# Supplementary material
Source: publisher figshare collection journal article supplement (https://tandf.figshare.com/articles/dataset/_/1339938)

Site 1

$K*100 = -0.4825$

$R^2 = 0.9073$

radius =  $-207.2335$

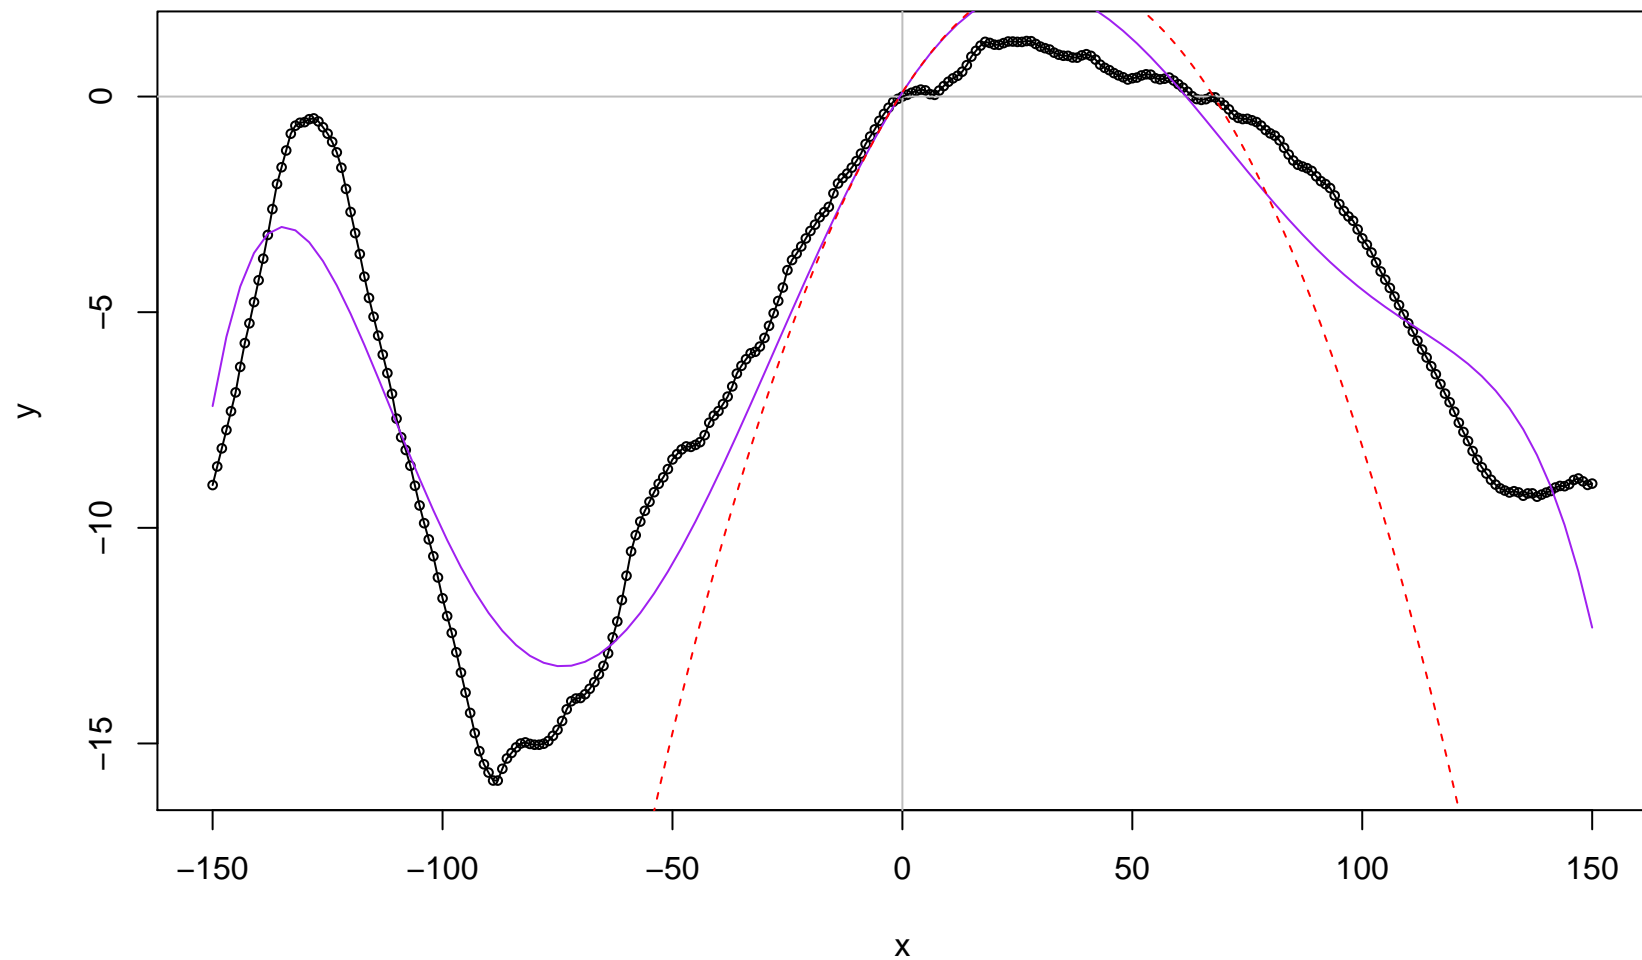

Site 2

$K \cdot 100 = 0.1012$

$R^2 = 0.9902$

radius= 988.2249

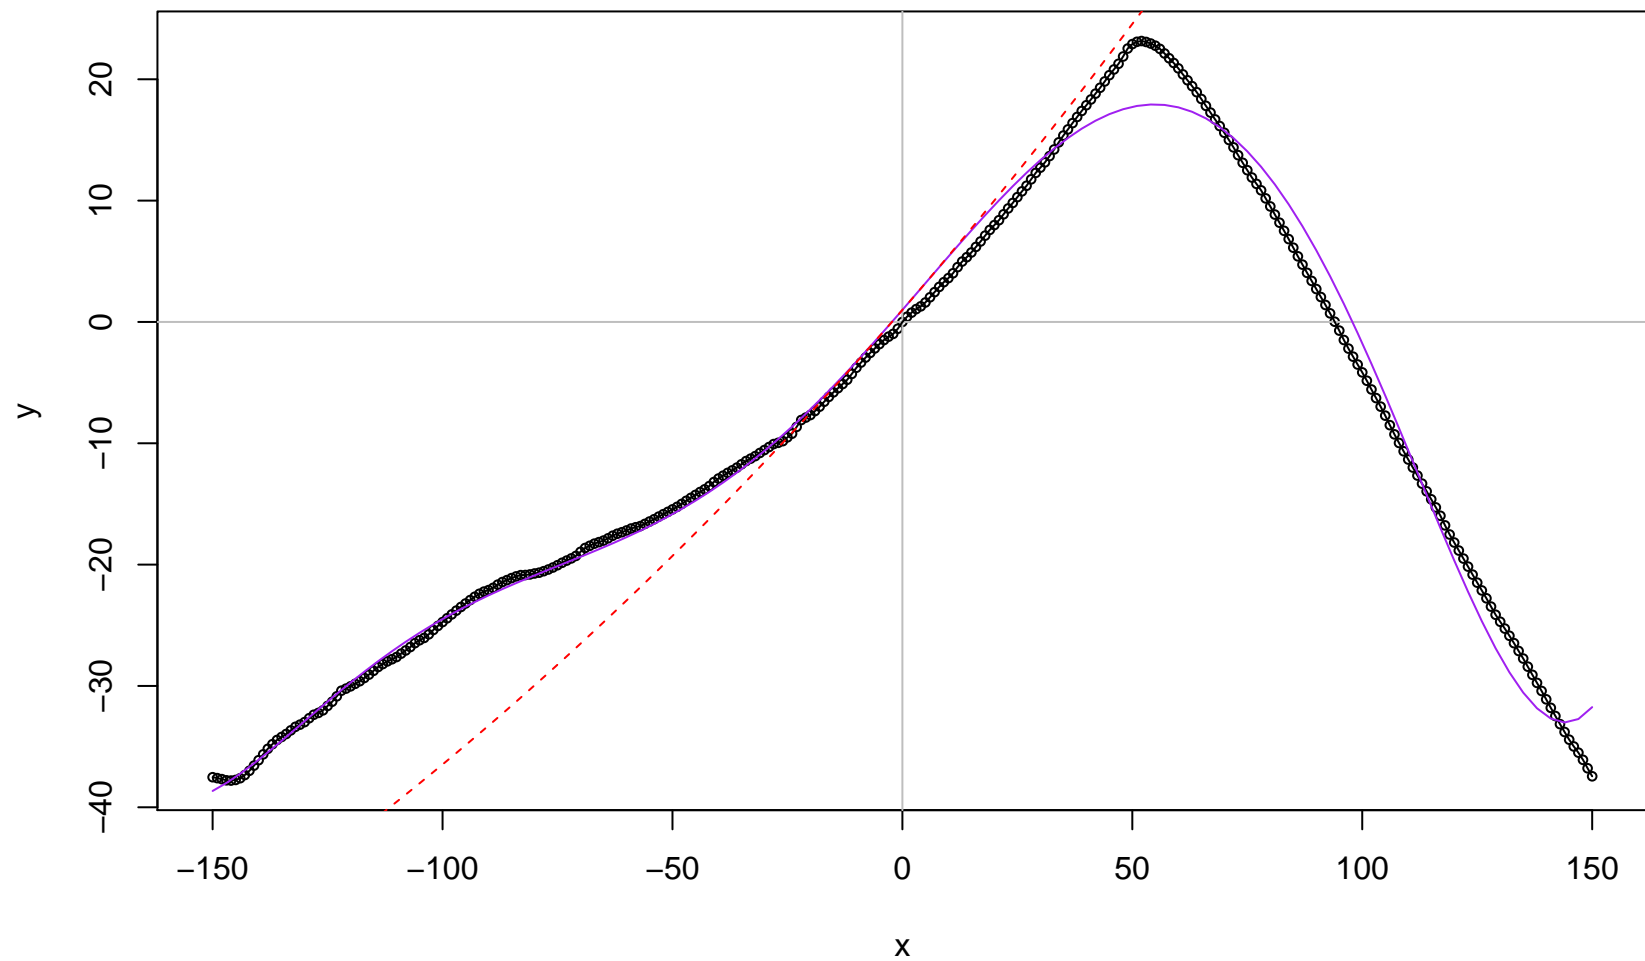

Site 3

$K \cdot 100 = -0.0298$

$R^2 = 0.9851$

radius =  $-3361.1599$

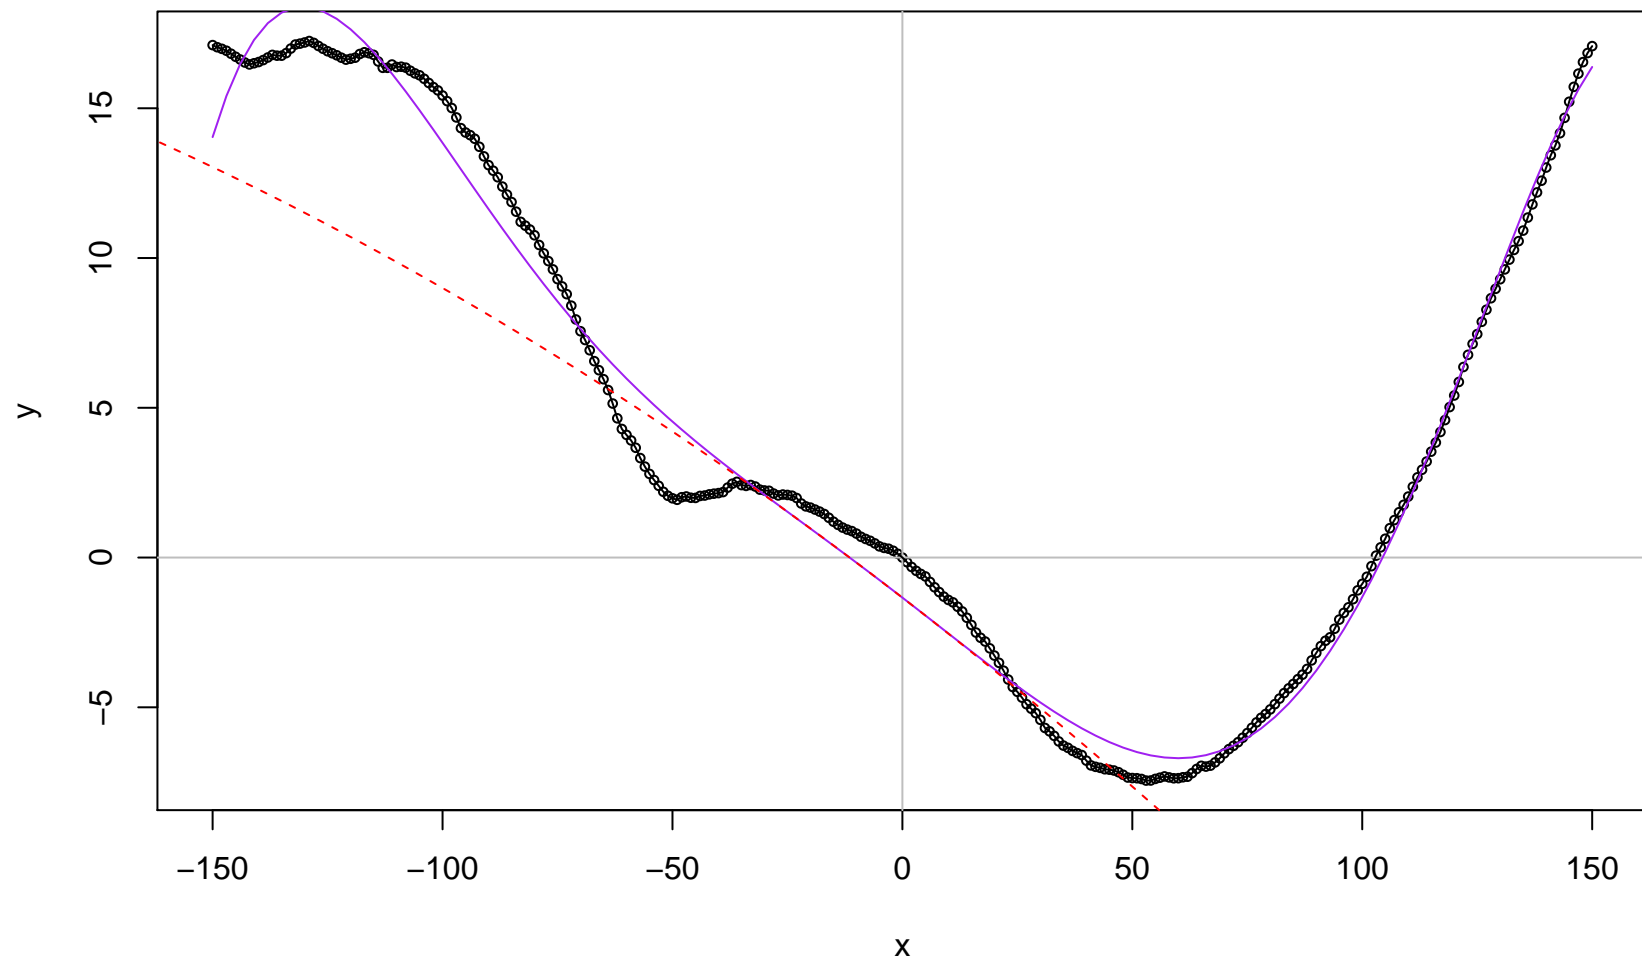

Site 4

$K \cdot 100 = 0.502$

$R^2 = 0.9859$

radius= 199.2051

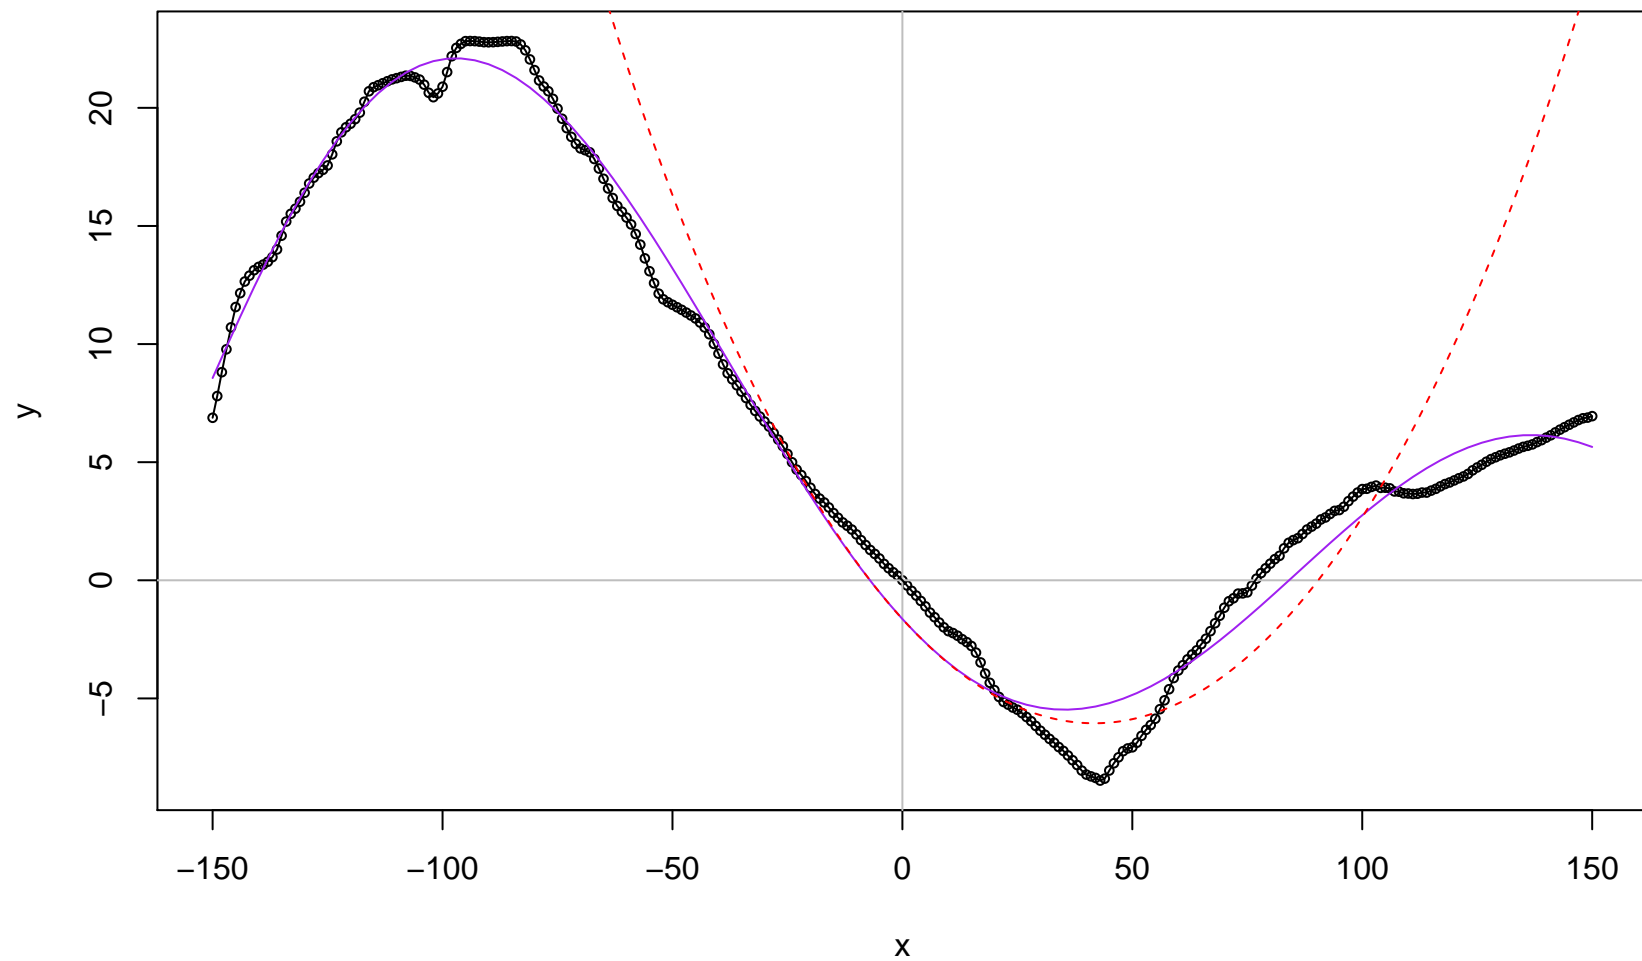

Site 5

$K \cdot 100 = 0.0143$

$R^2 = 0.9729$

radius= 6978.8635

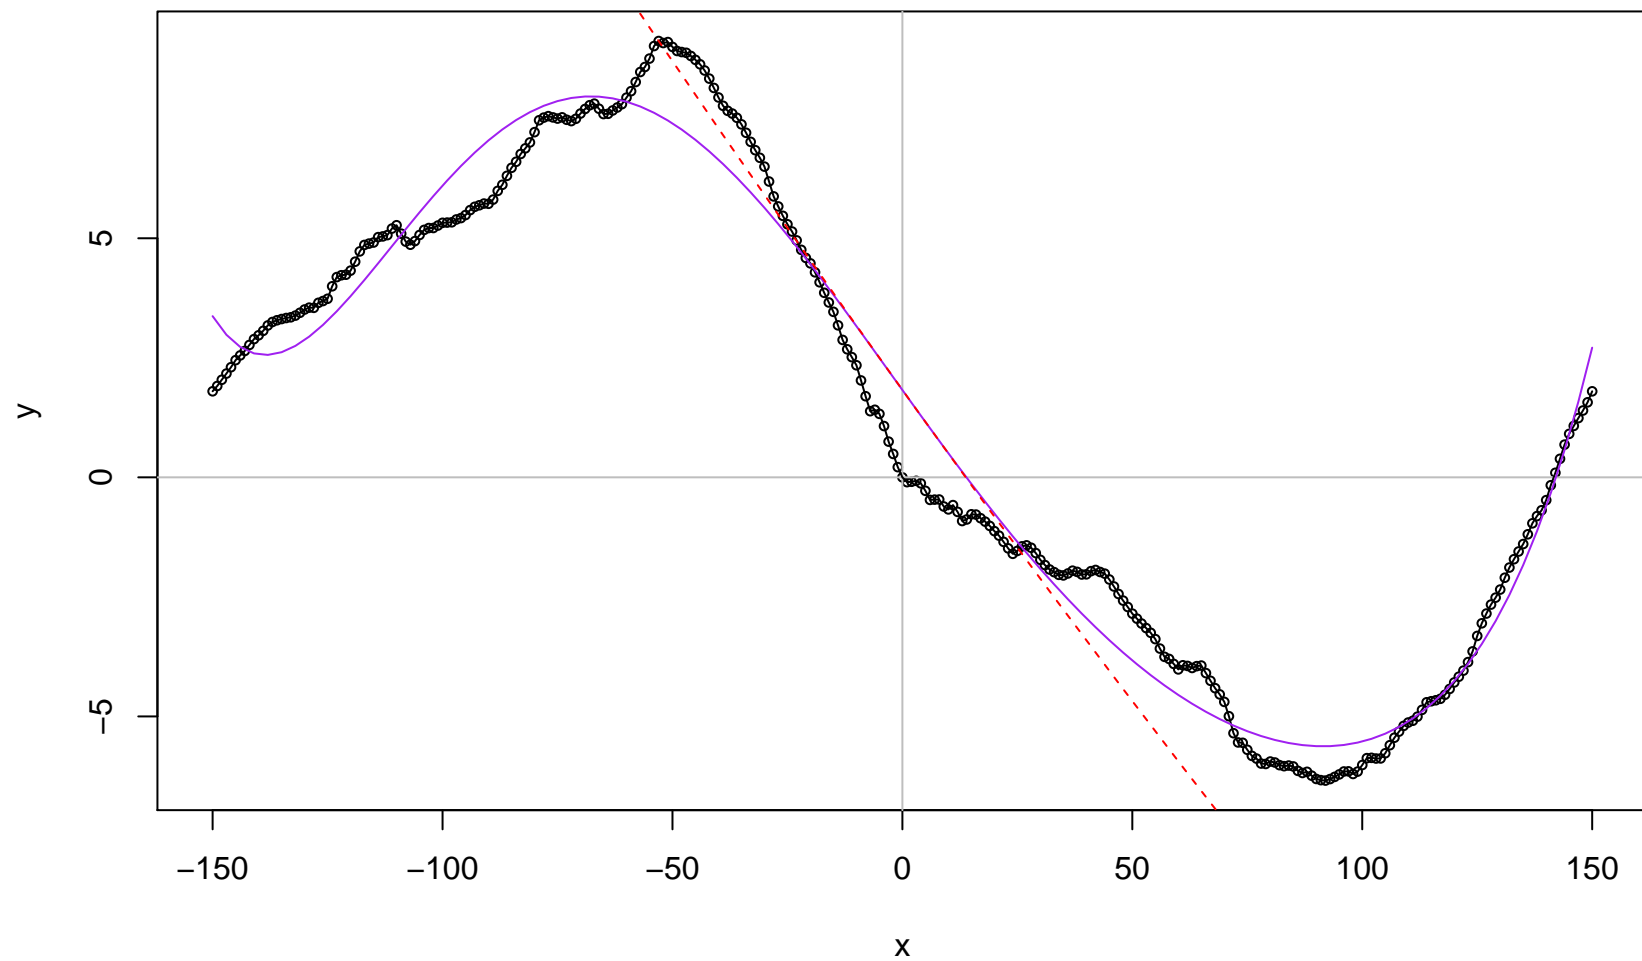

Site 6

$K*100= 0.686$

$R^2= 0.9884$

radius= 145.7659

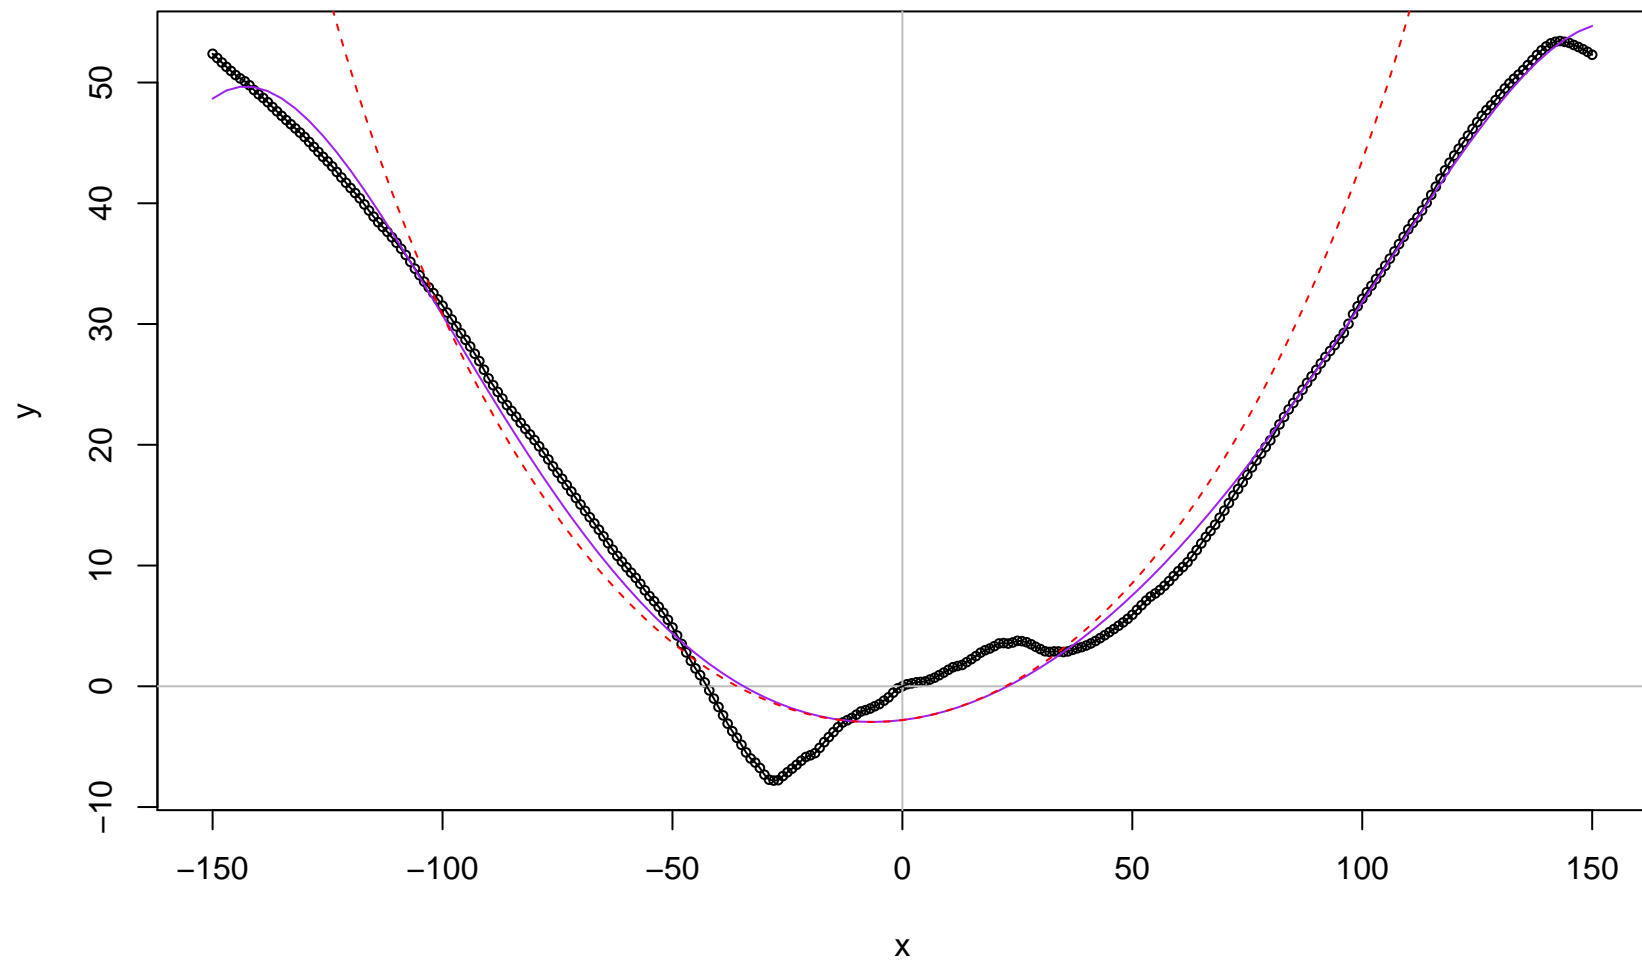

Site 7

$K*100 = -0.1585$

$R^2 = 0.9553$

radius = -631.0925

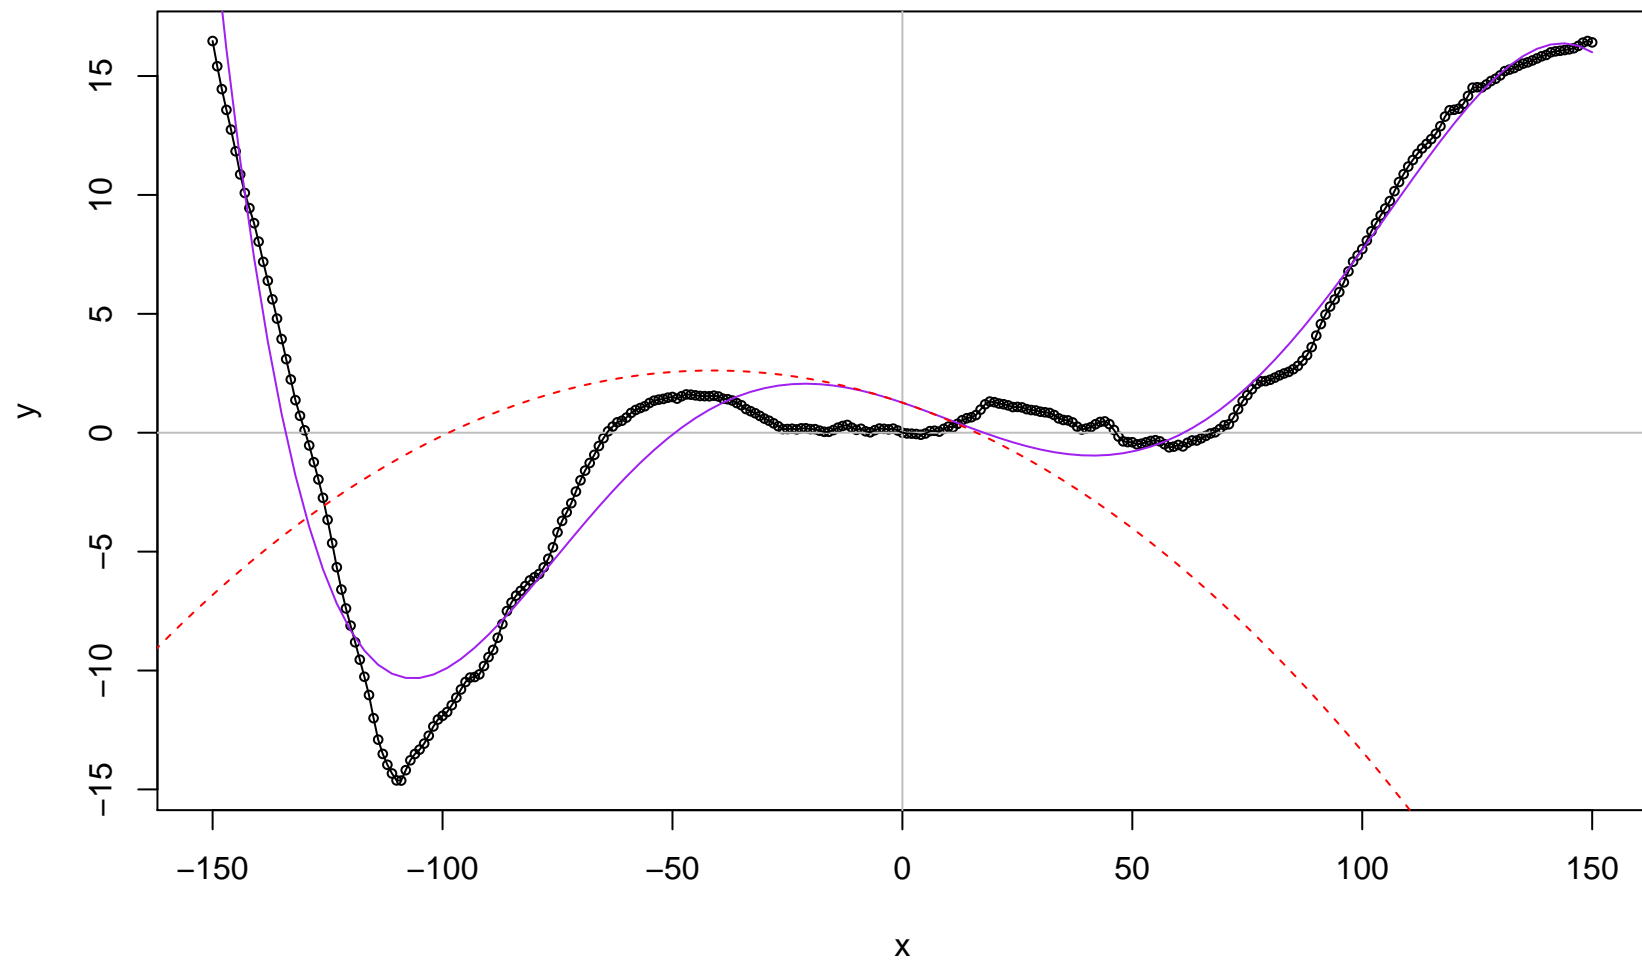

Site 8

$K*100 = -0.2169$

$R^2 = 0.9393$

radius =  $-460.9745$

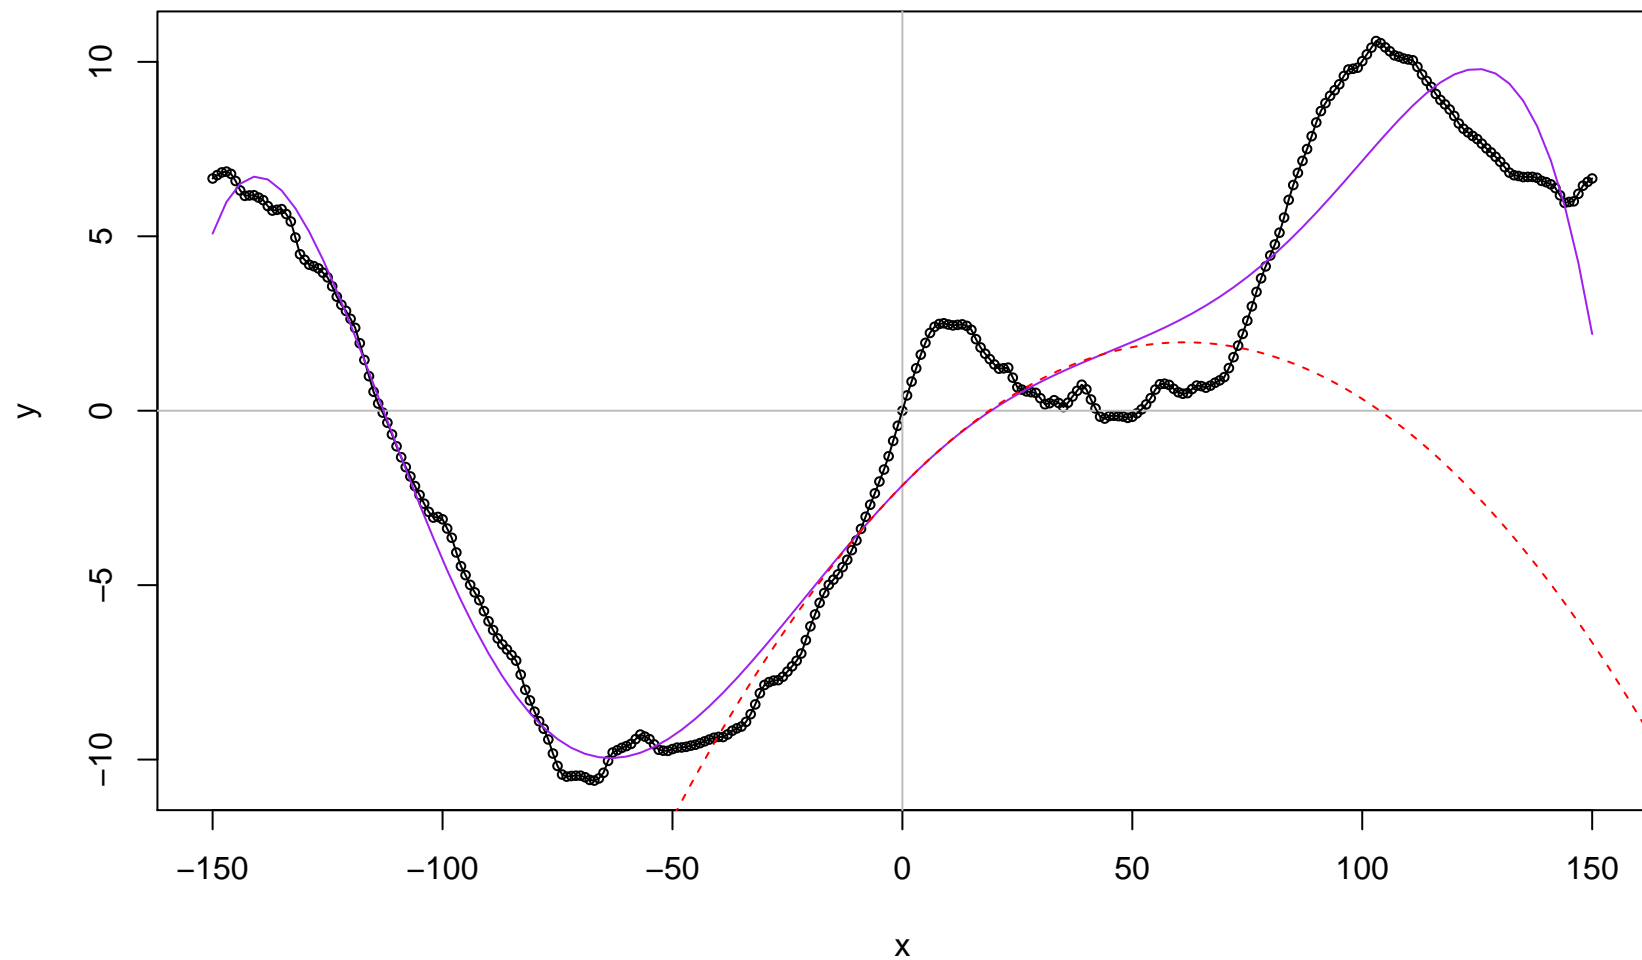



Site 9

$K*100 = -0.1108$

$R^2 = 0.9415$

radius =  $-902.5252$

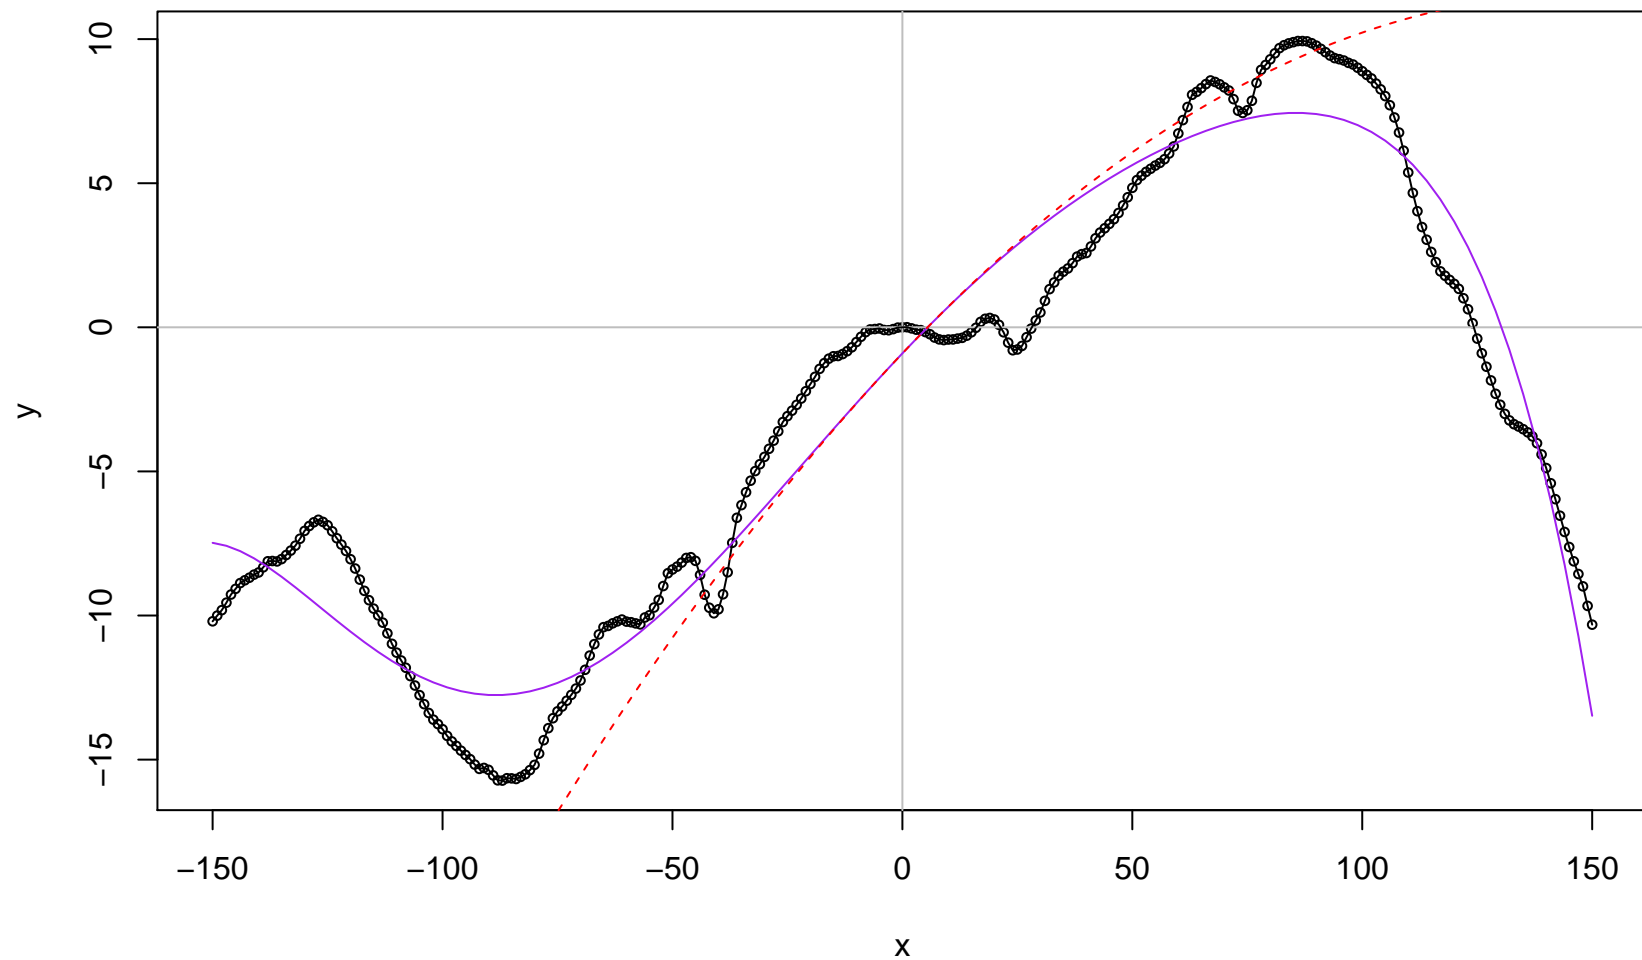

Site 10

$K \cdot 100 = 0.3965$

$R^2 = 0.971$

radius= 252.1836

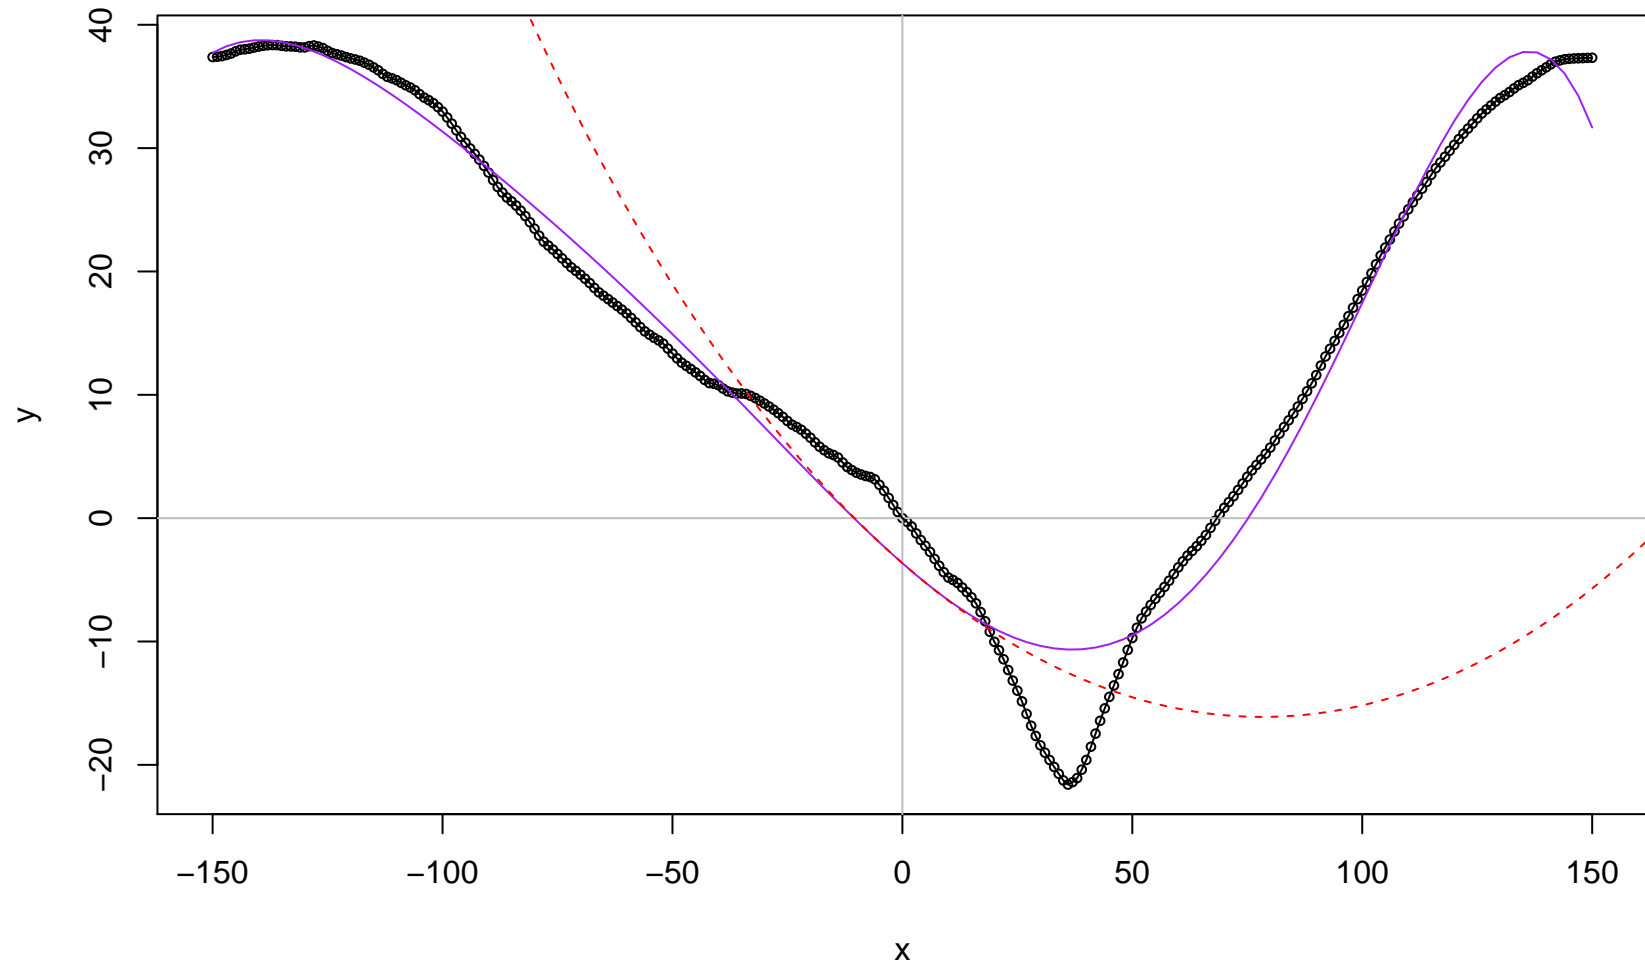

Site 11

$K \cdot 100 = 0.9167$

$R^2 = 0.9752$

radius= 109.0855

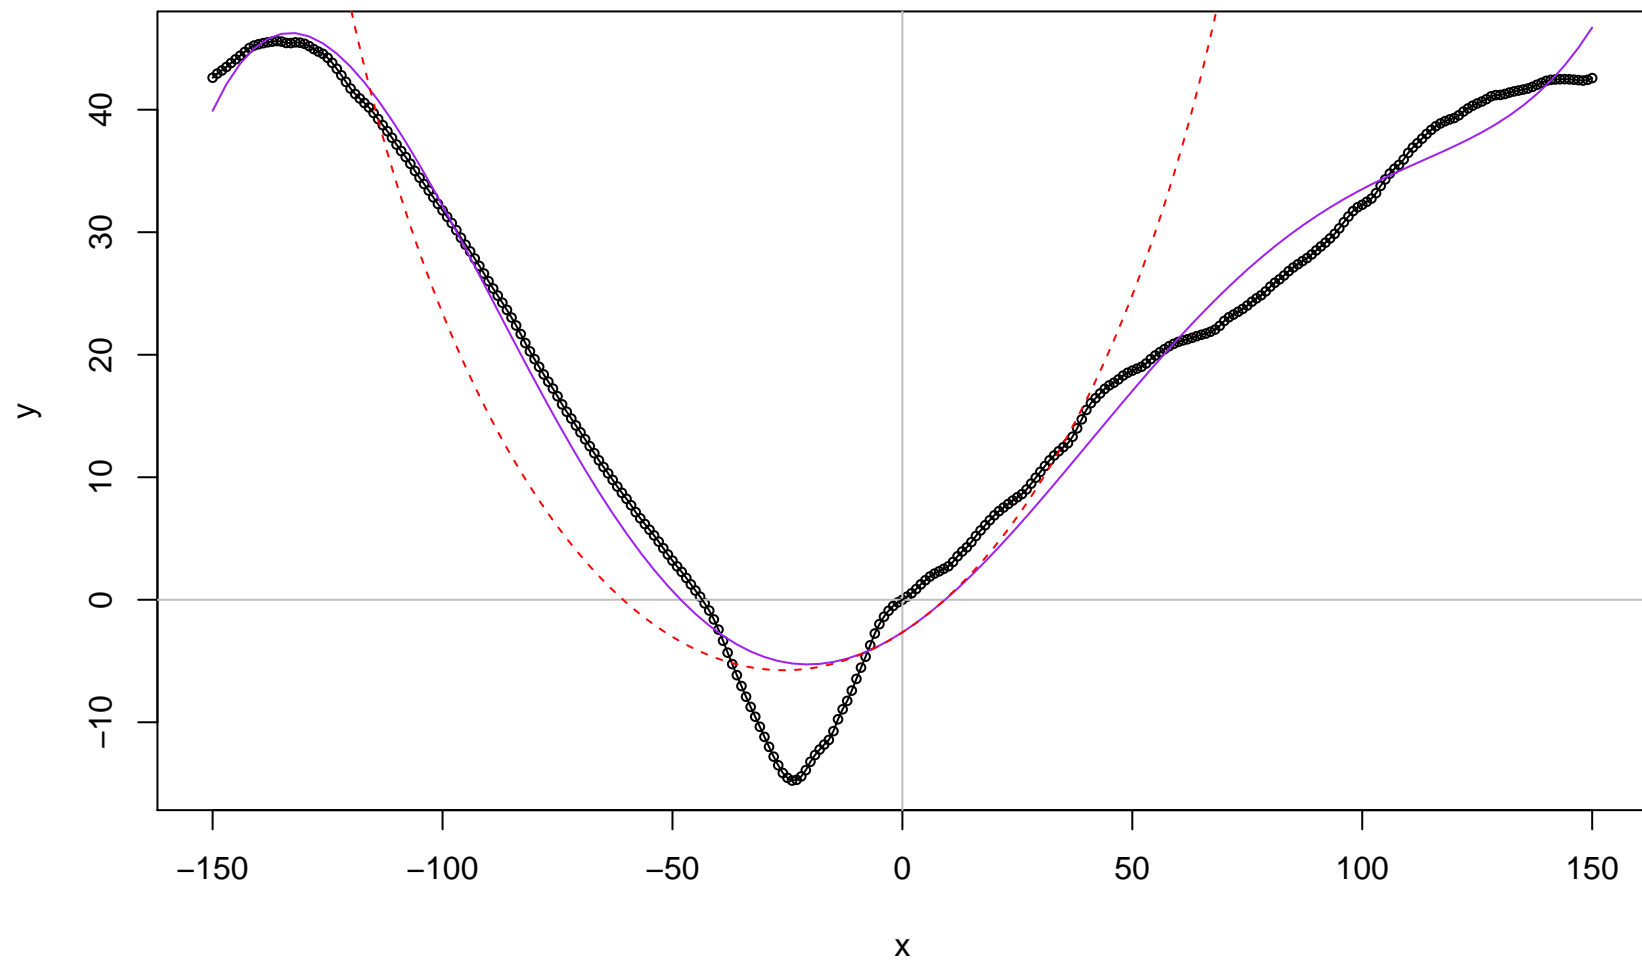

Site 12

$K*100= 0.9457$

$R^2= 0.9901$

radius= 105.7365

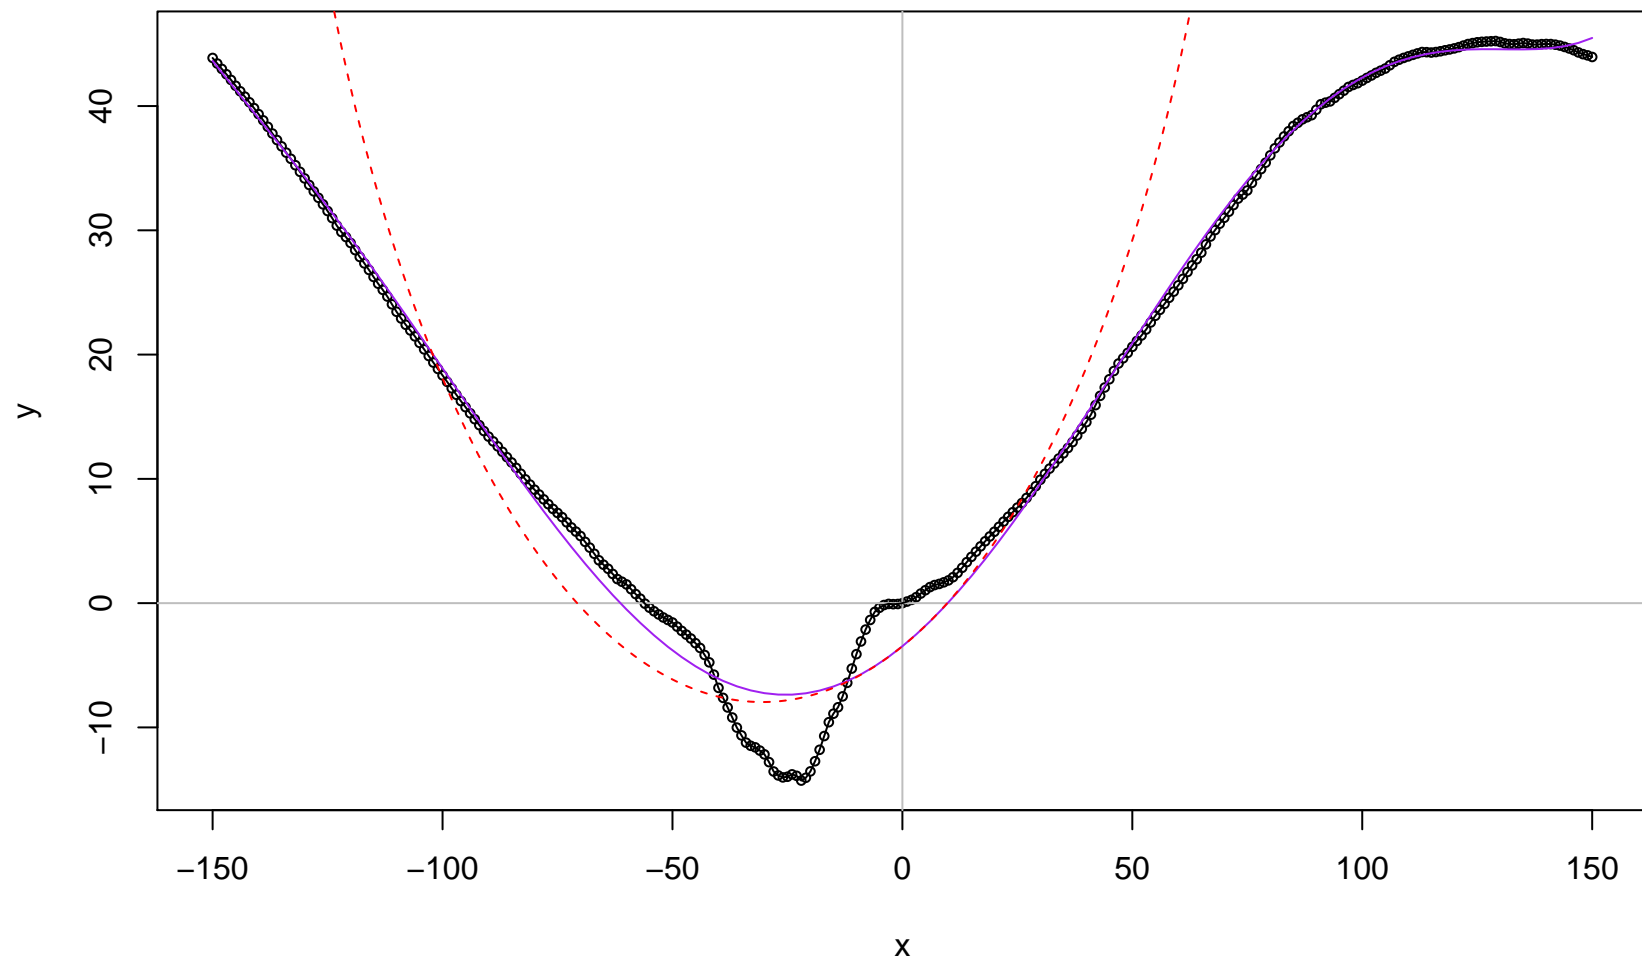

Site 13

$K \cdot 100 = -1.3799$

$R^2 = 0.9923$

radius =  $-72.4671$

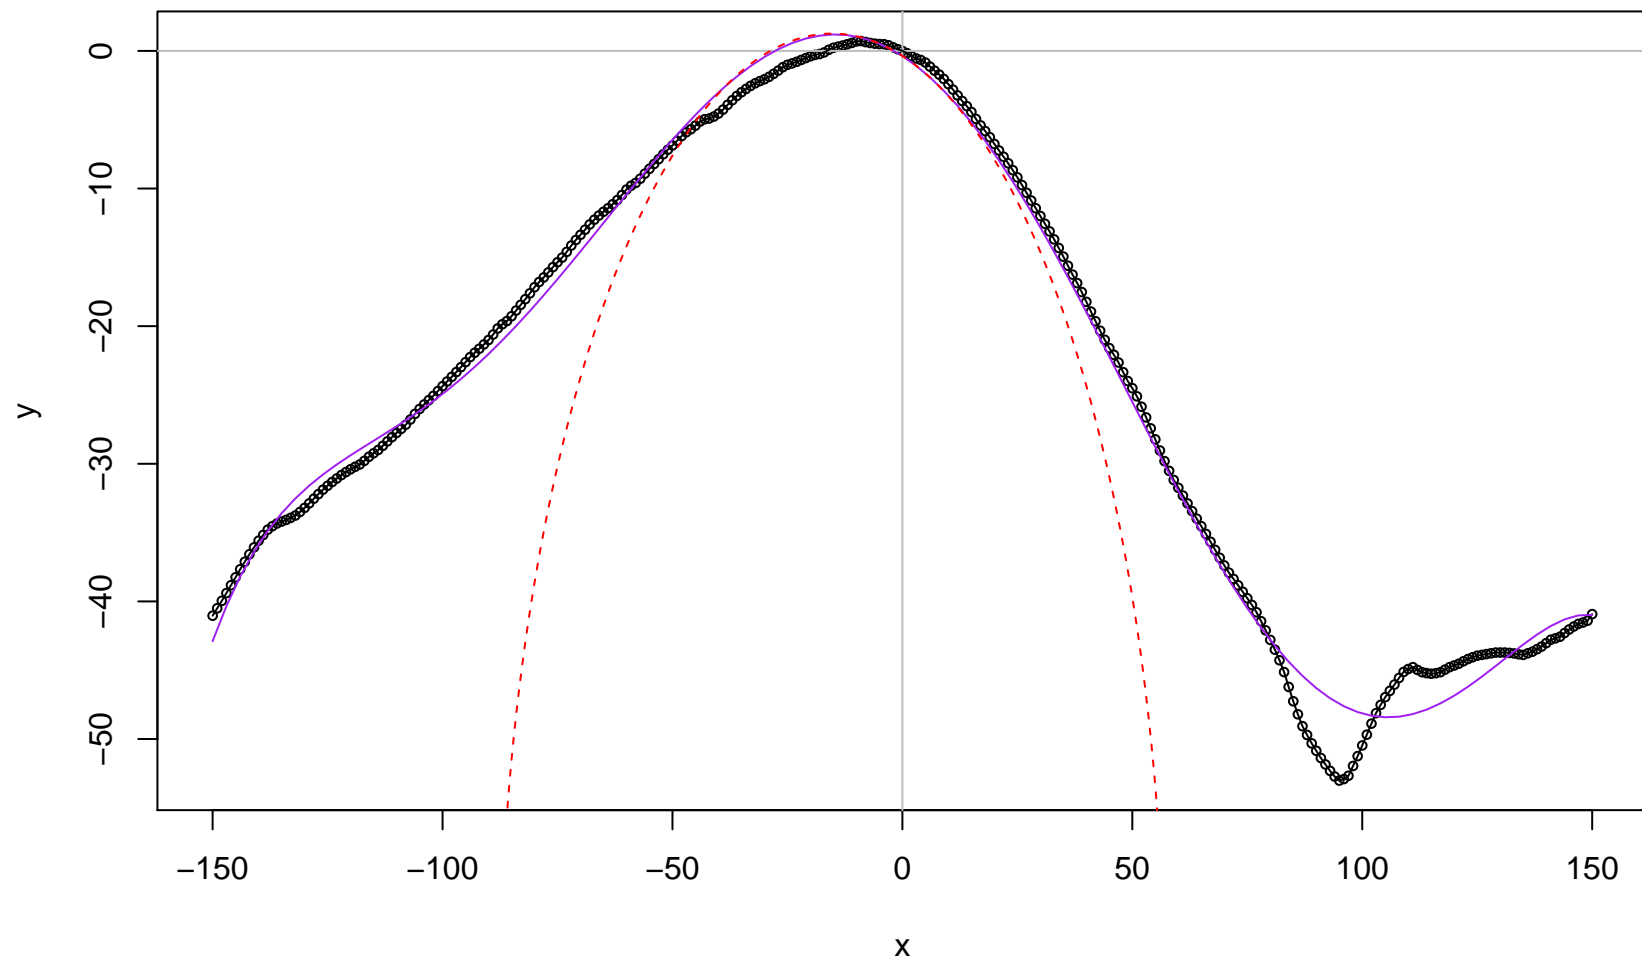

Site 14

$K \cdot 100 = 1.0556$

$R^2 = 0.9784$

radius= 94.7302

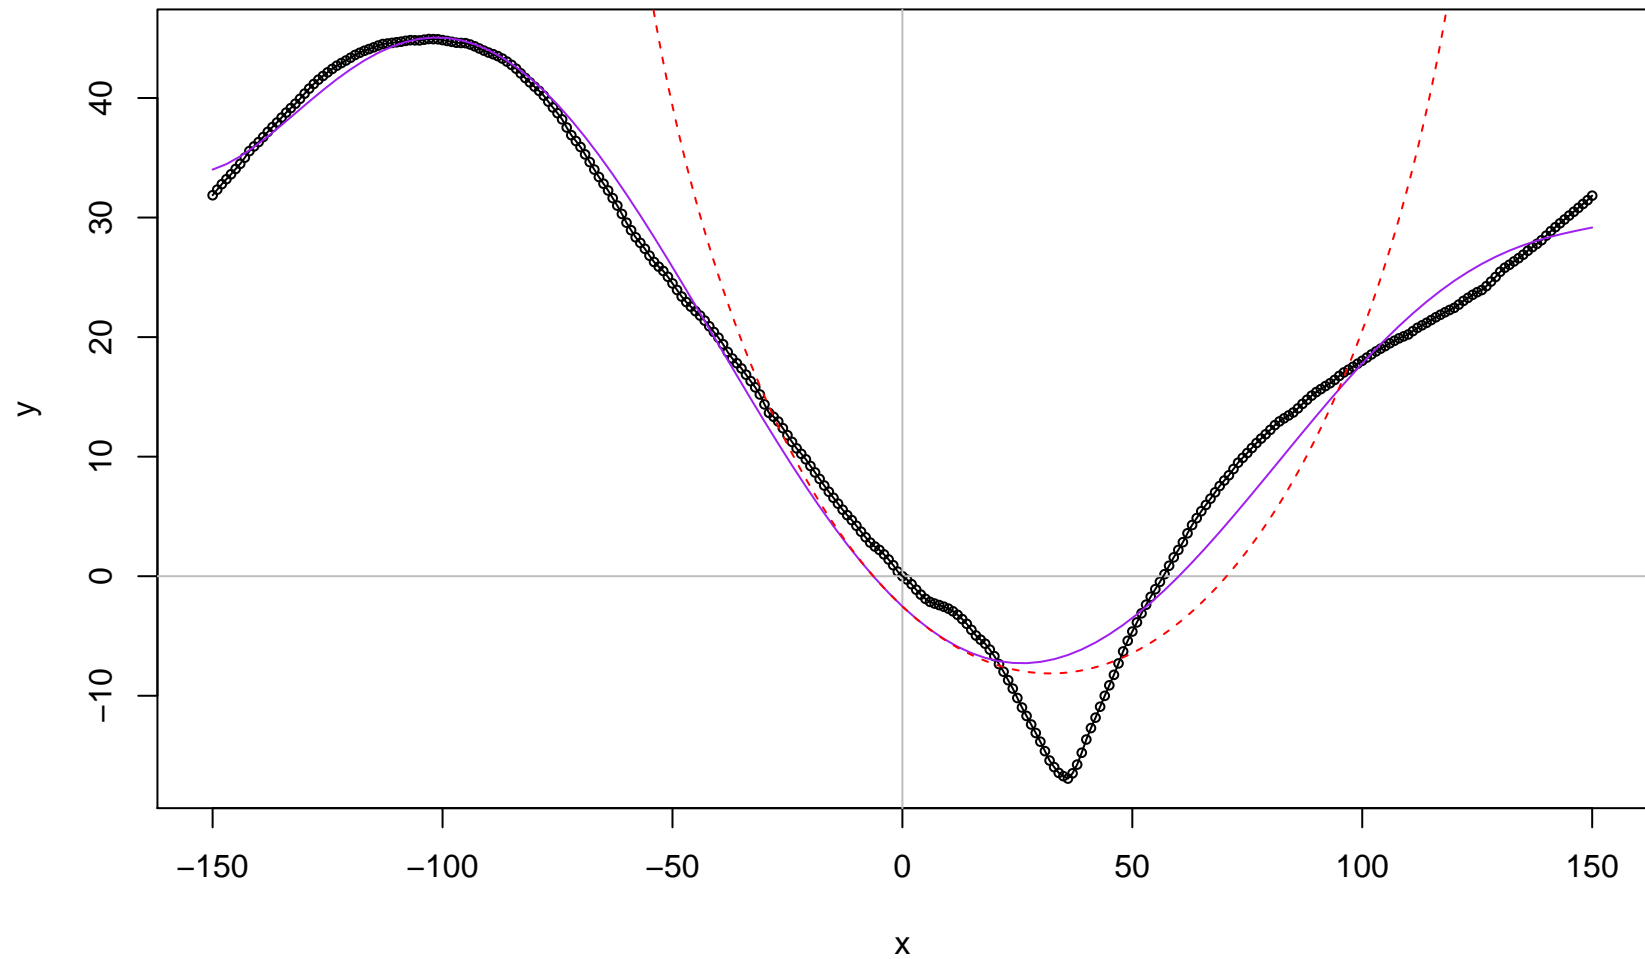

Site 15

$K*100 = -0.1948$

$R^2 = 0.9763$

radius = -513.2172

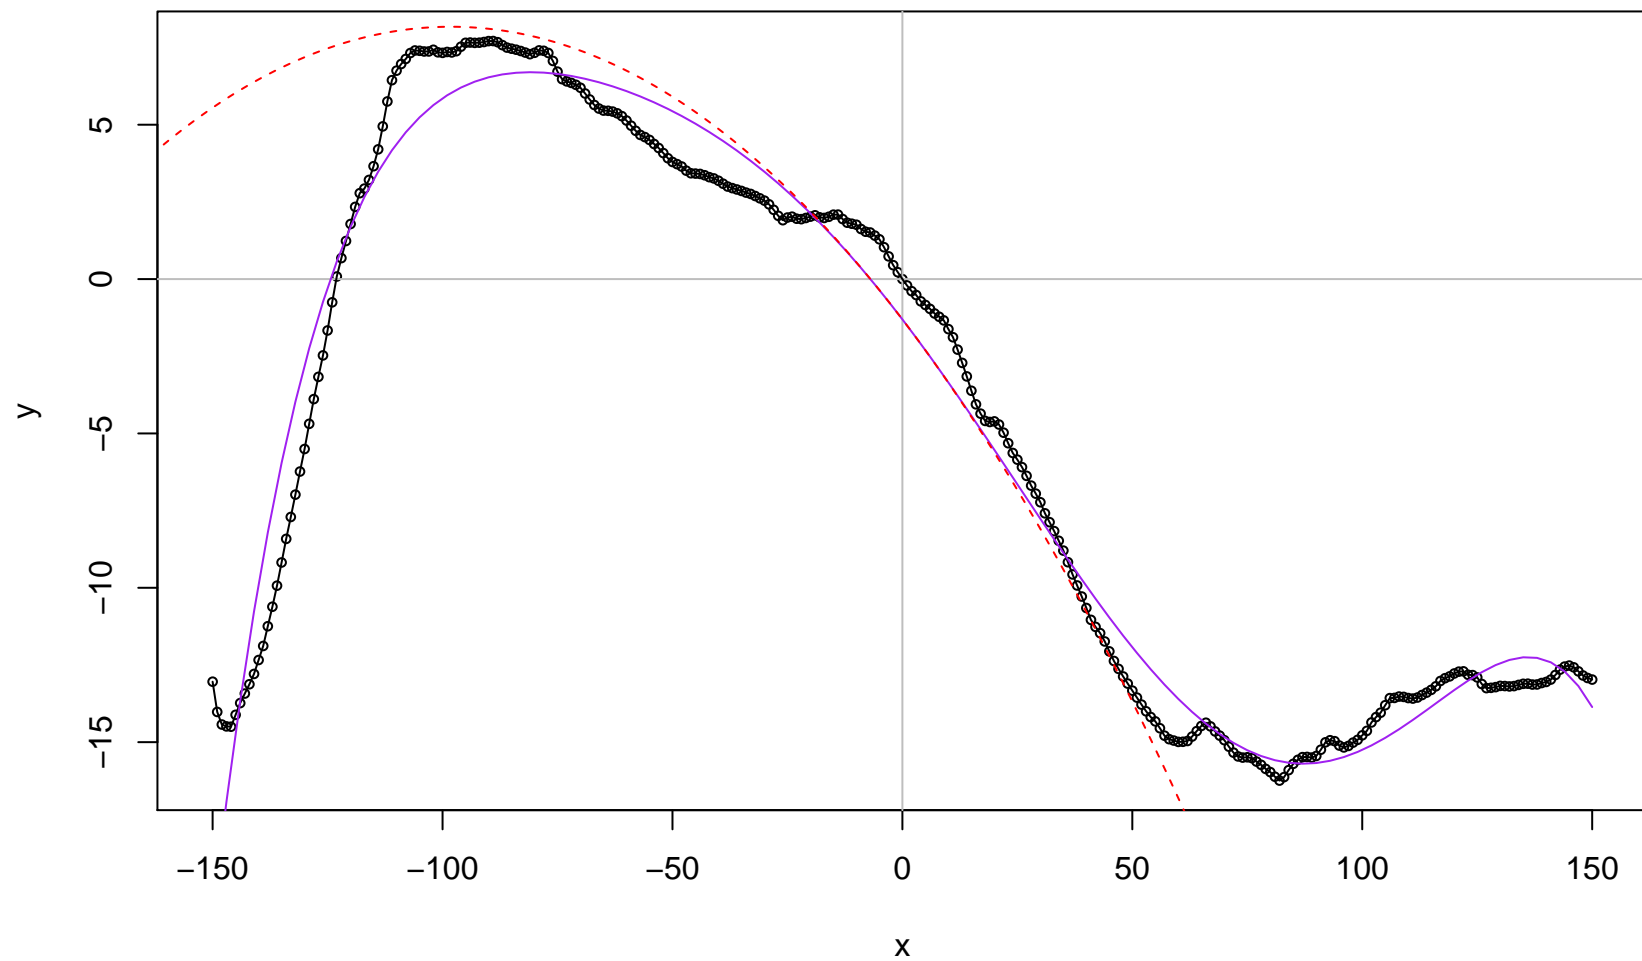

Site 16

$K*100 = -0.1031$

$R^2 = 0.9937$

radius = -970.3181

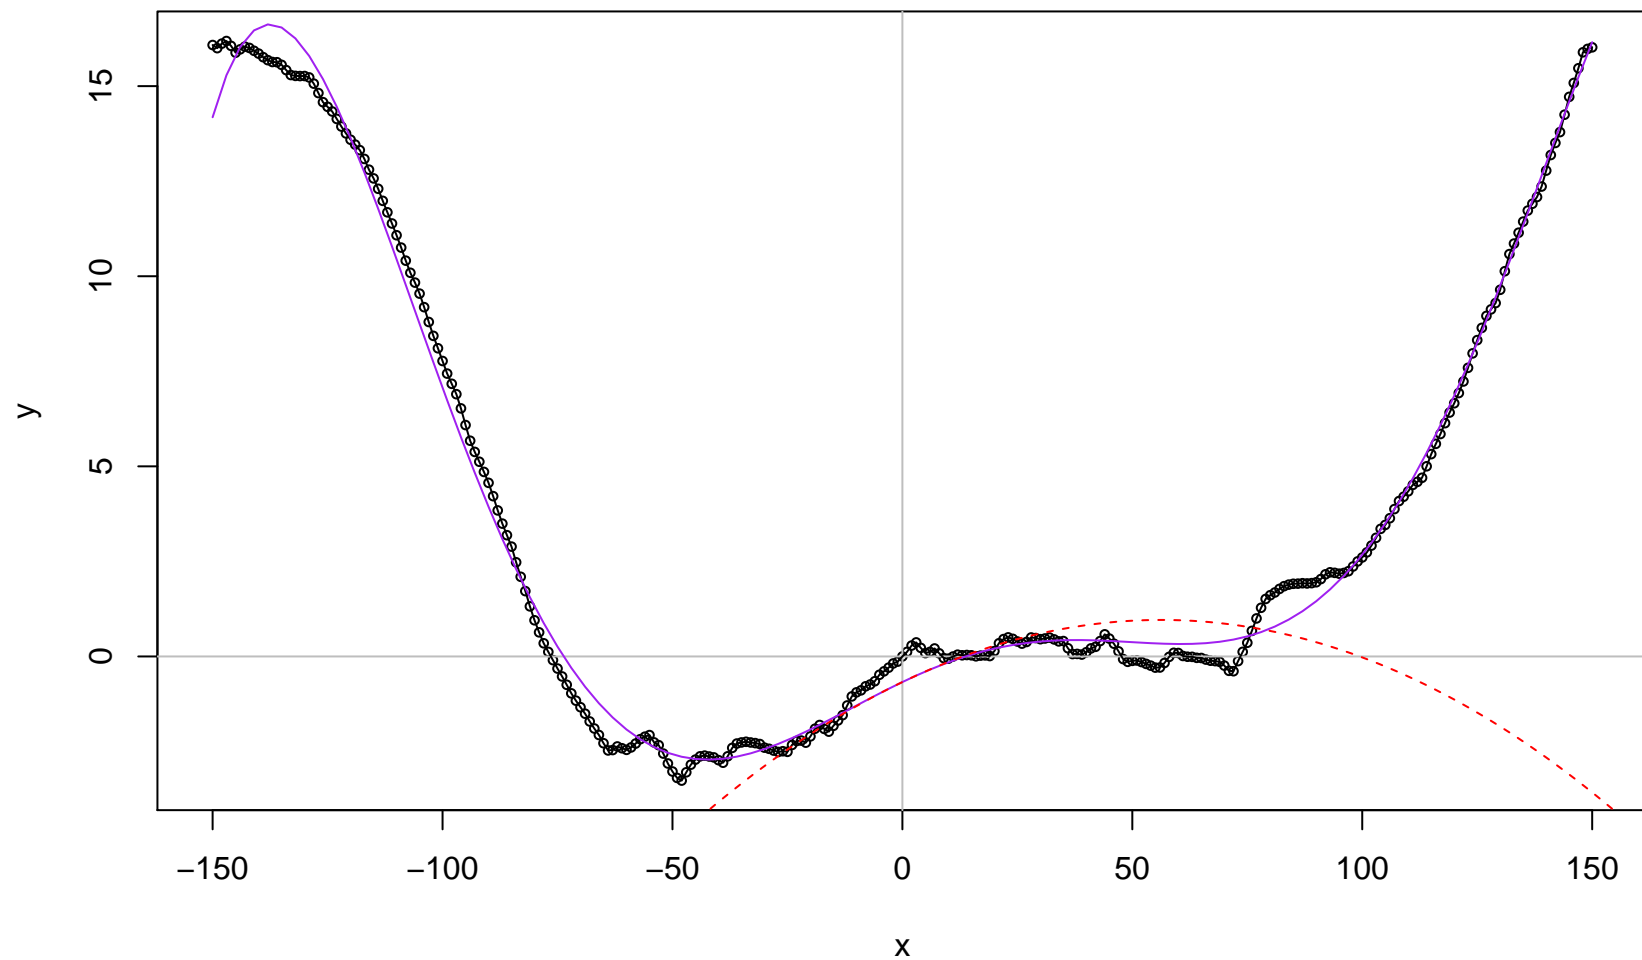



Site 17

$K*100= 0.1536$

$R^2= 0.9731$

radius= 651.0829

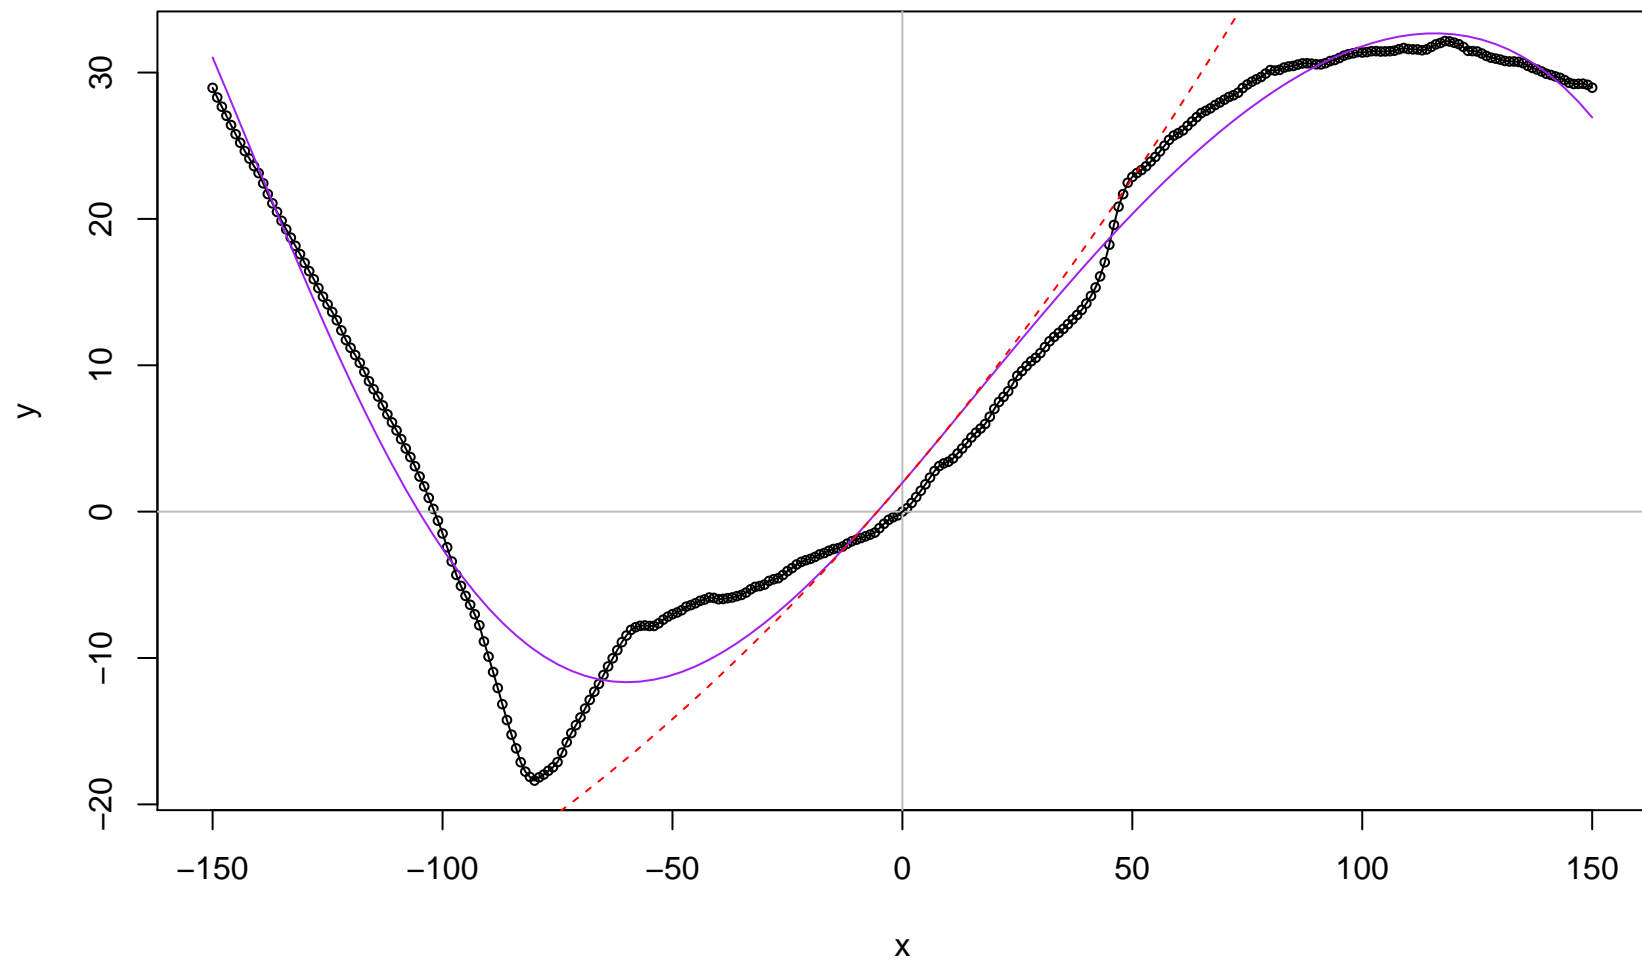

Site 18

$K*100 = -0.0679$

$R^2 = 0.9943$

radius =  $-1472.7647$

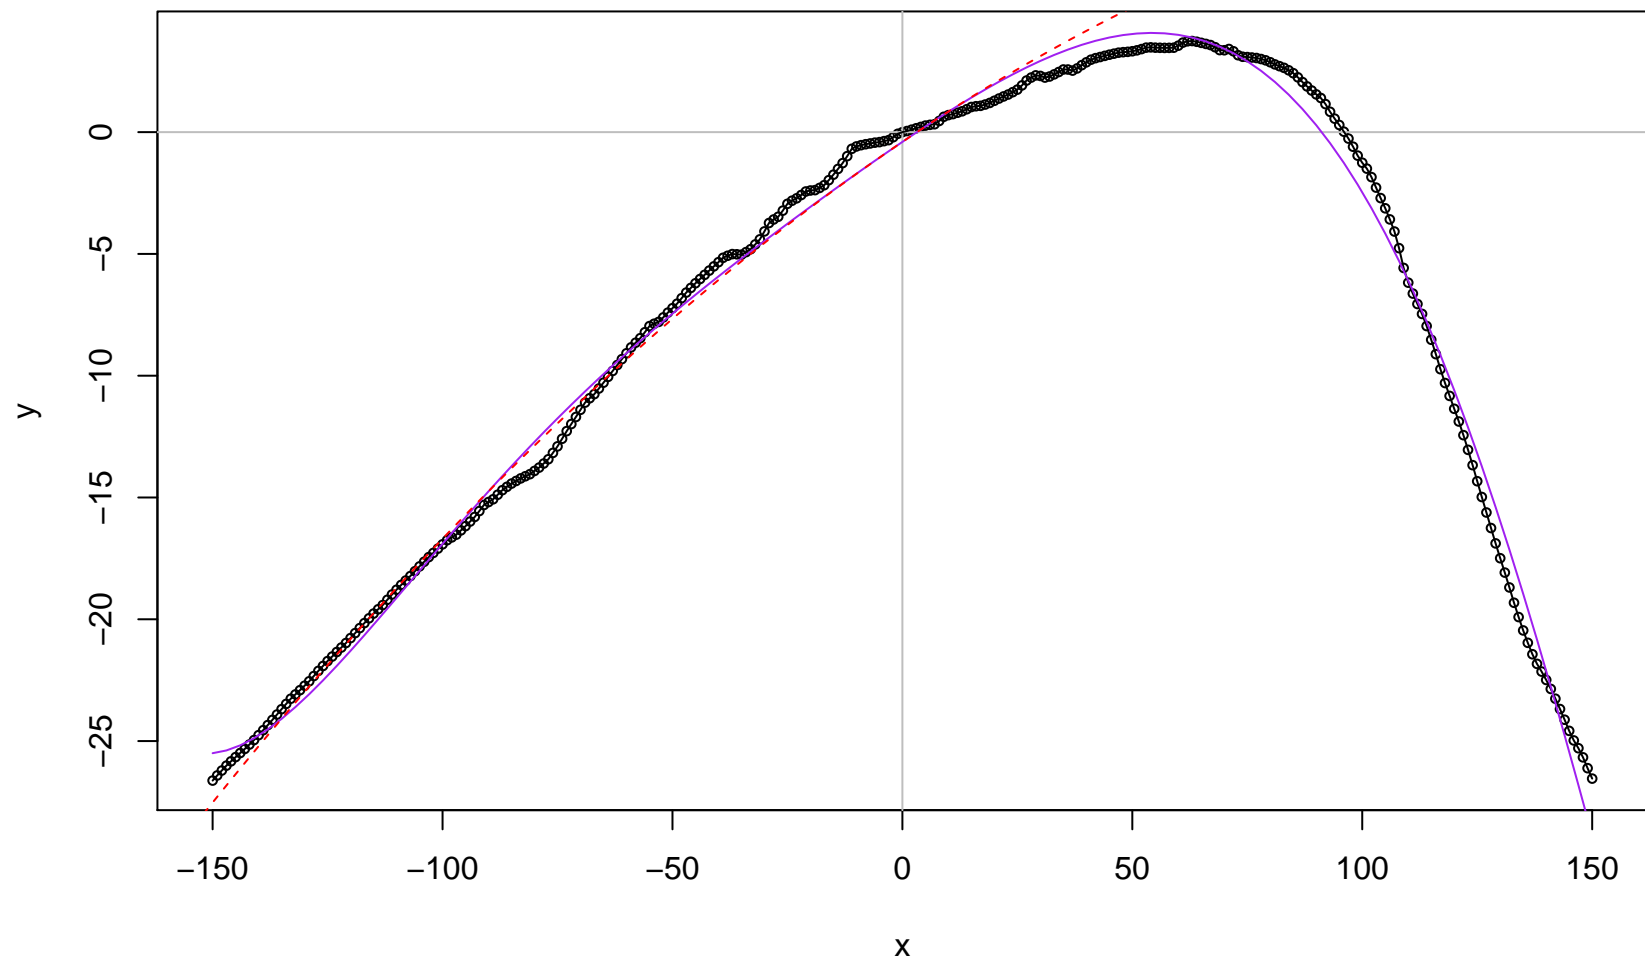

Site 19

$K*100= 1.0015$

$R^2= 0.9939$

radius= 99.851

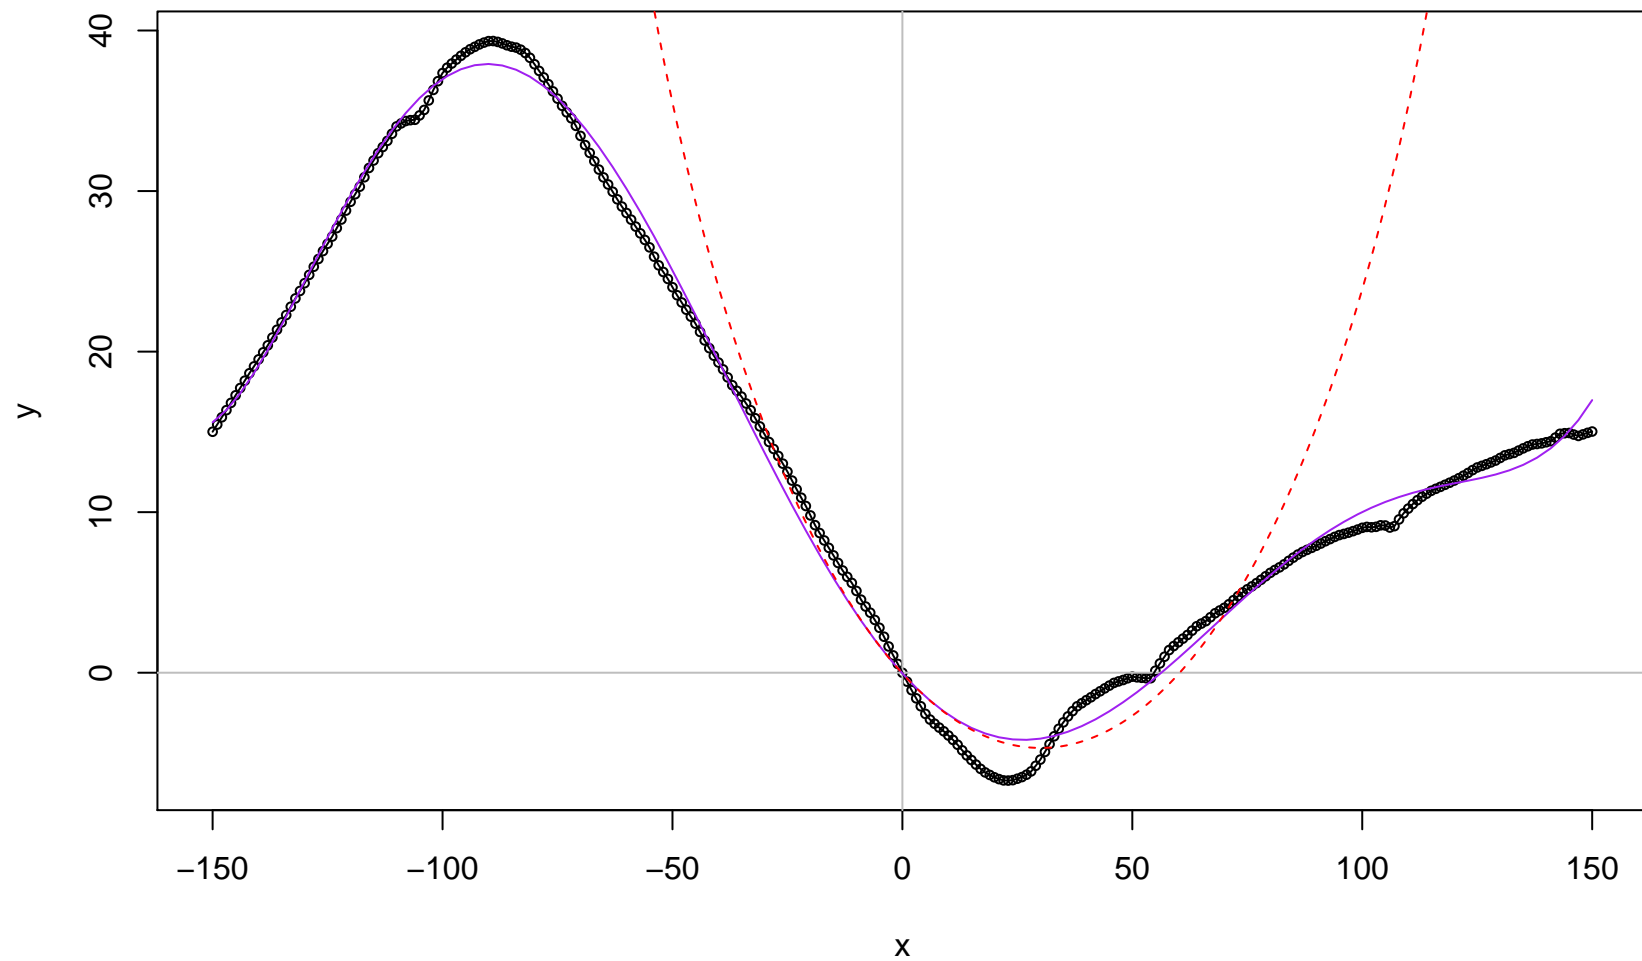

Site 20

$K*100= 1.4267$

$R^2= 0.9943$

radius= 70.0941

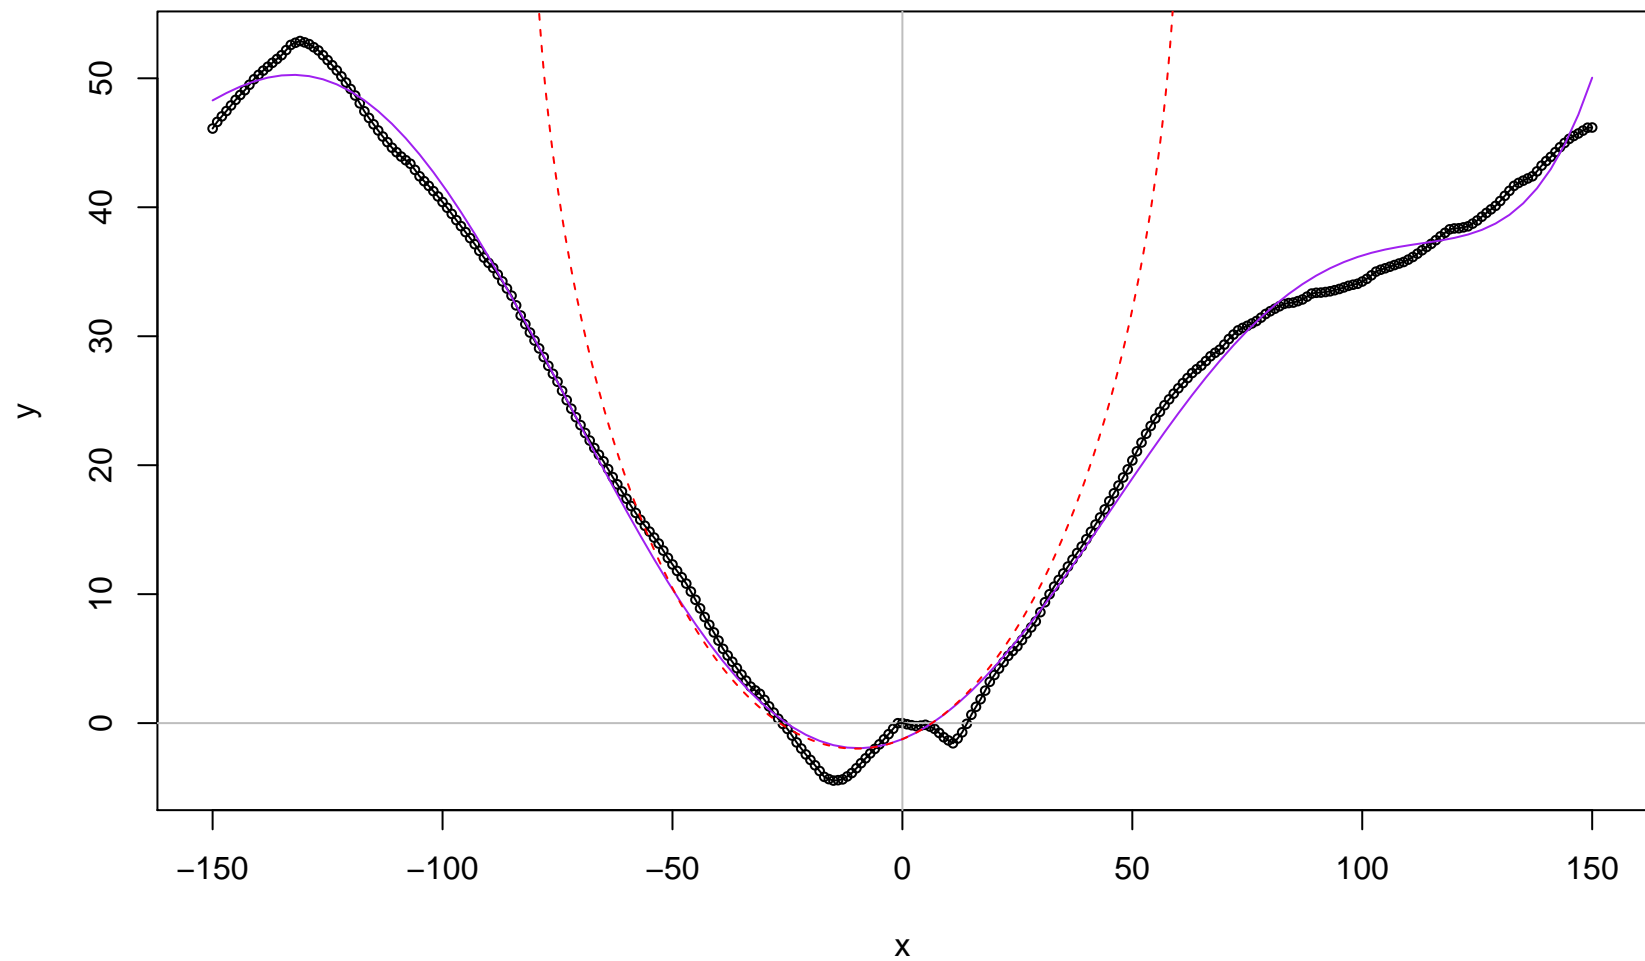

Site 21

$K \cdot 100 = 1.0975$

$R^2 = 0.9663$

radius= 91.1129

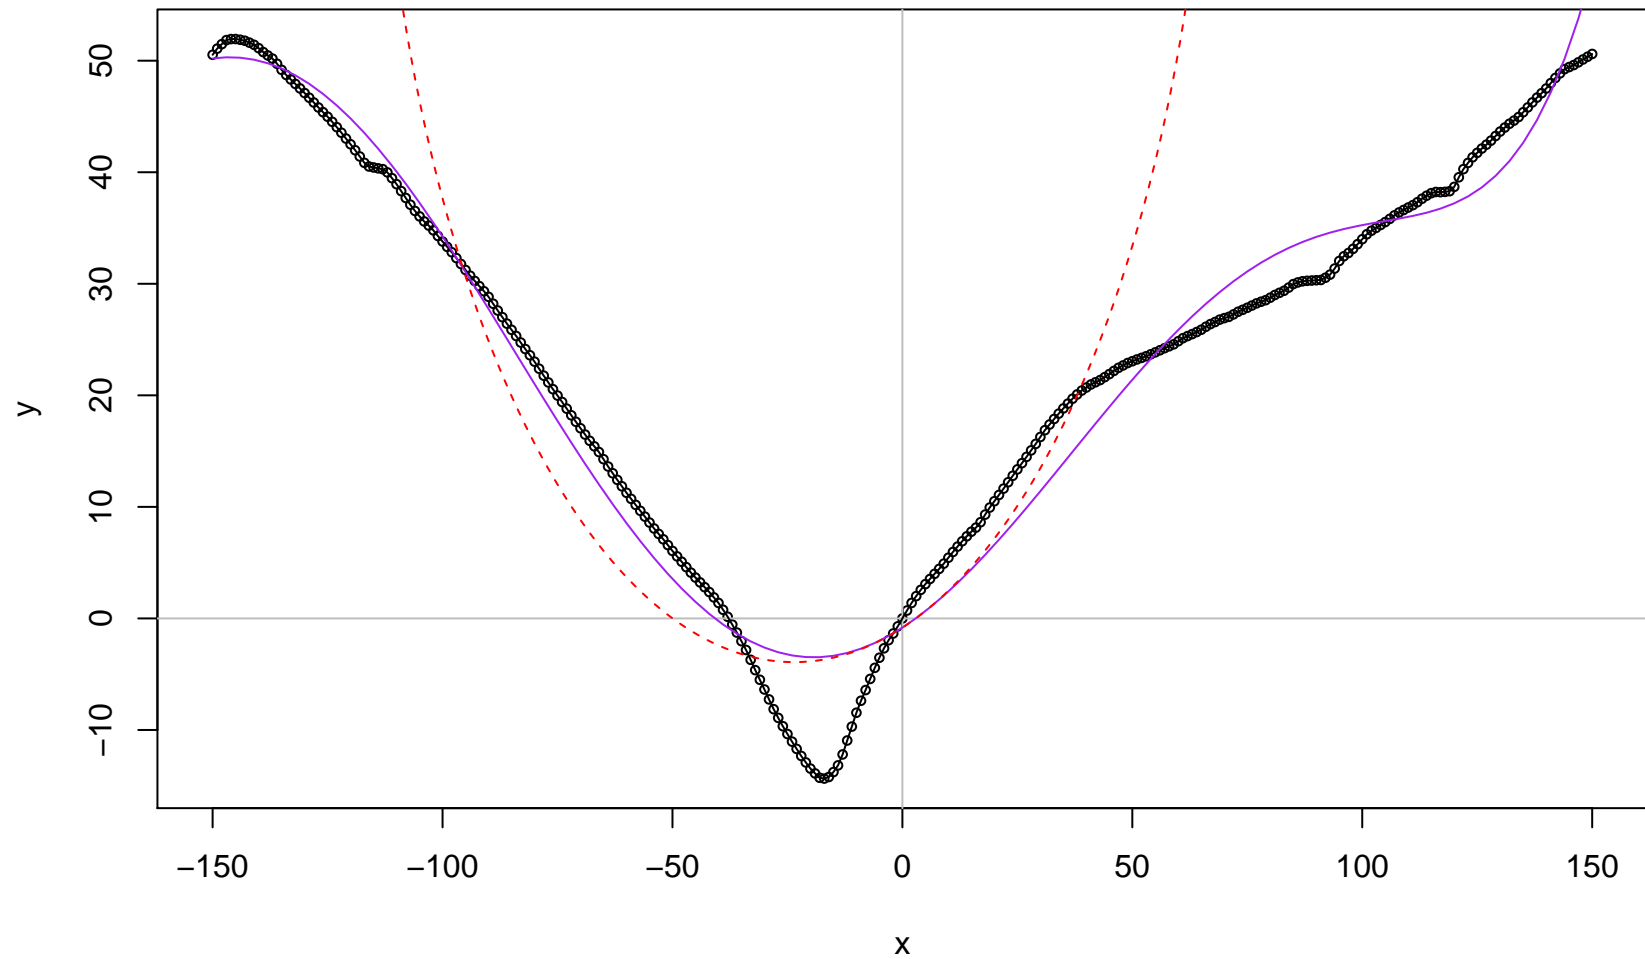

Site 22

$K \cdot 100 = -0.58$

$R^2 = 0.9401$

radius =  $-172.4137$

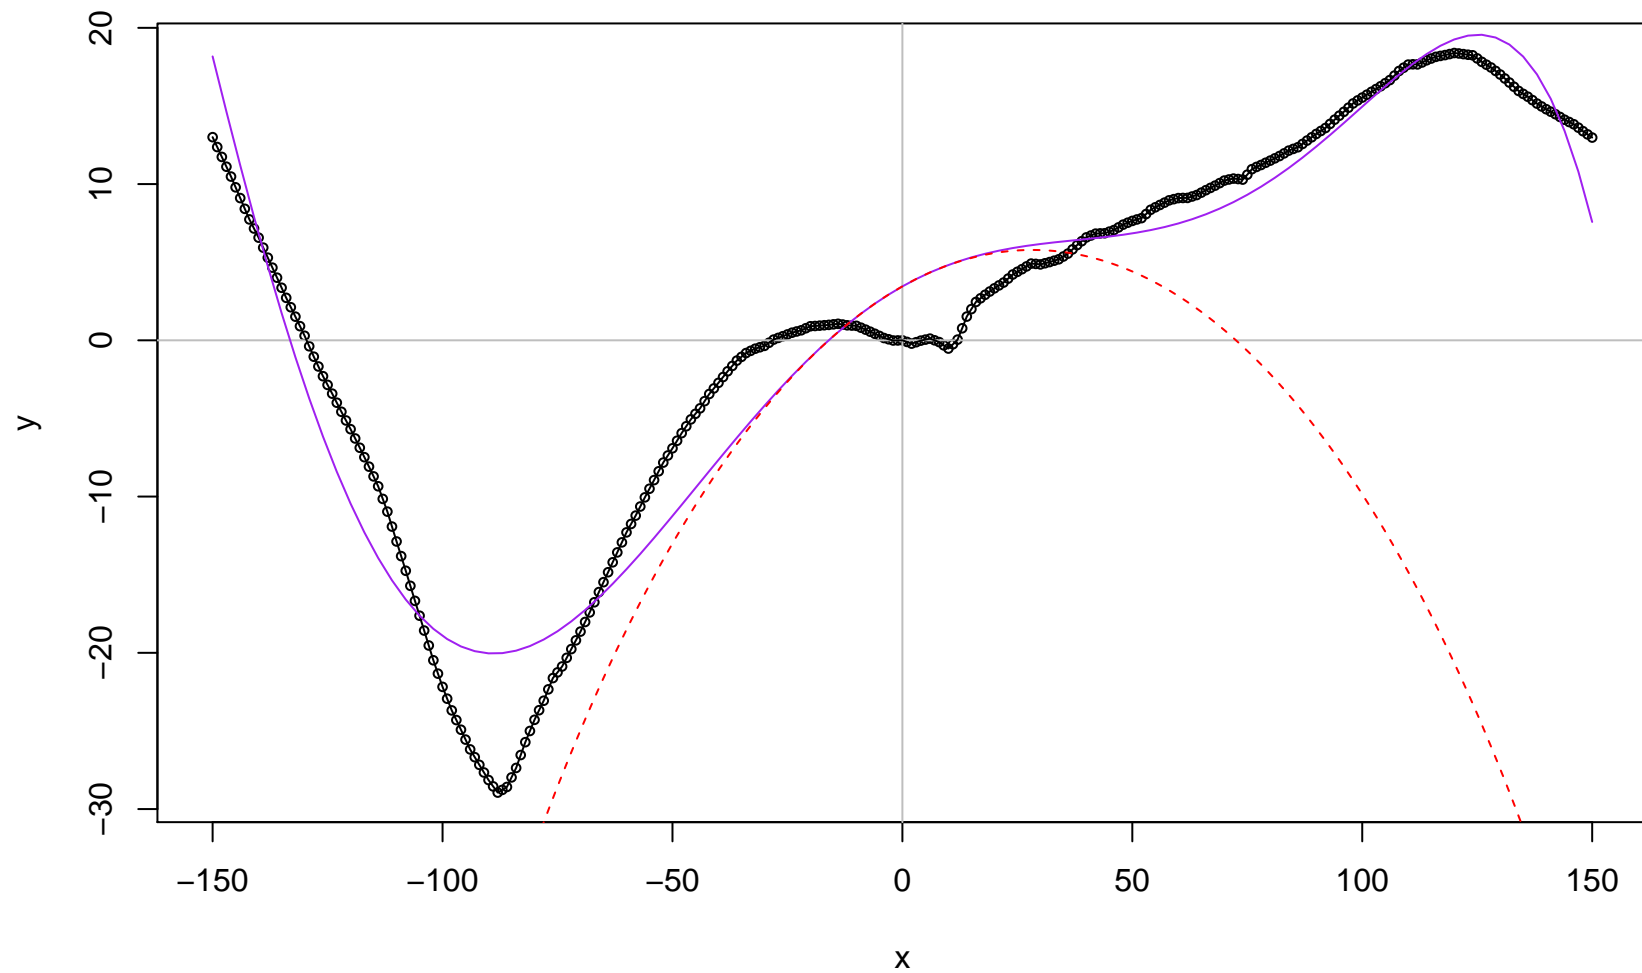

Site 23

$K \cdot 100 = 1.1041$

$R^2 = 0.9499$

radius= 90.5715

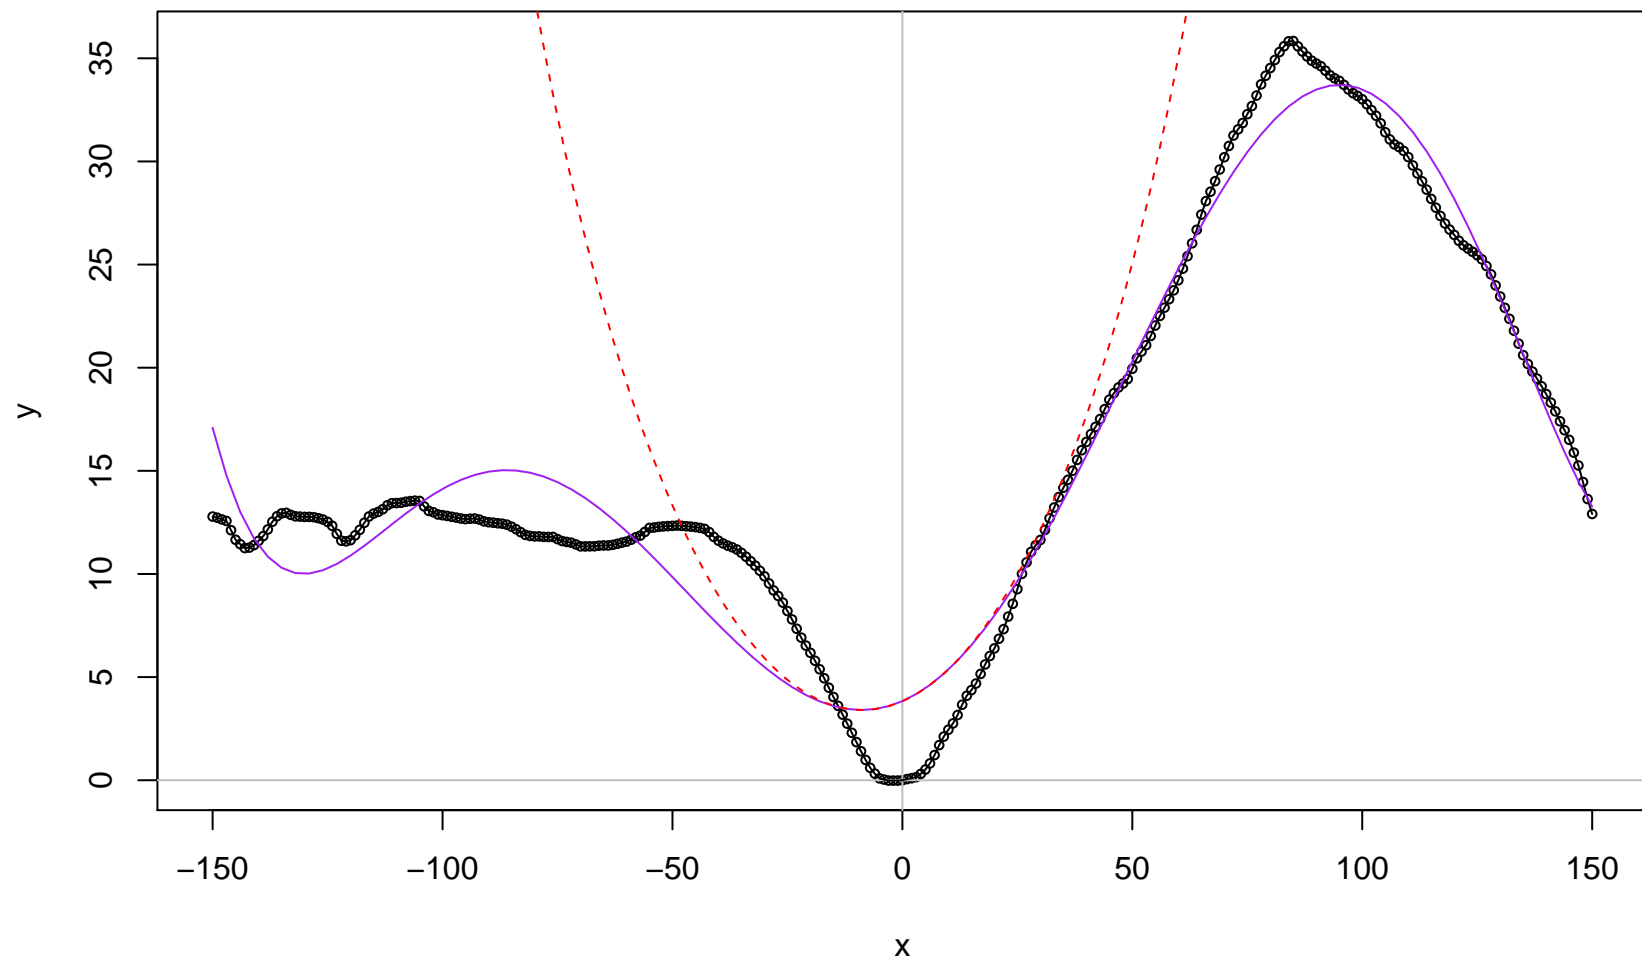

Site 24

$K \cdot 100 = -0.3335$

$R^2 = 0.9655$

radius =  $-299.8723$

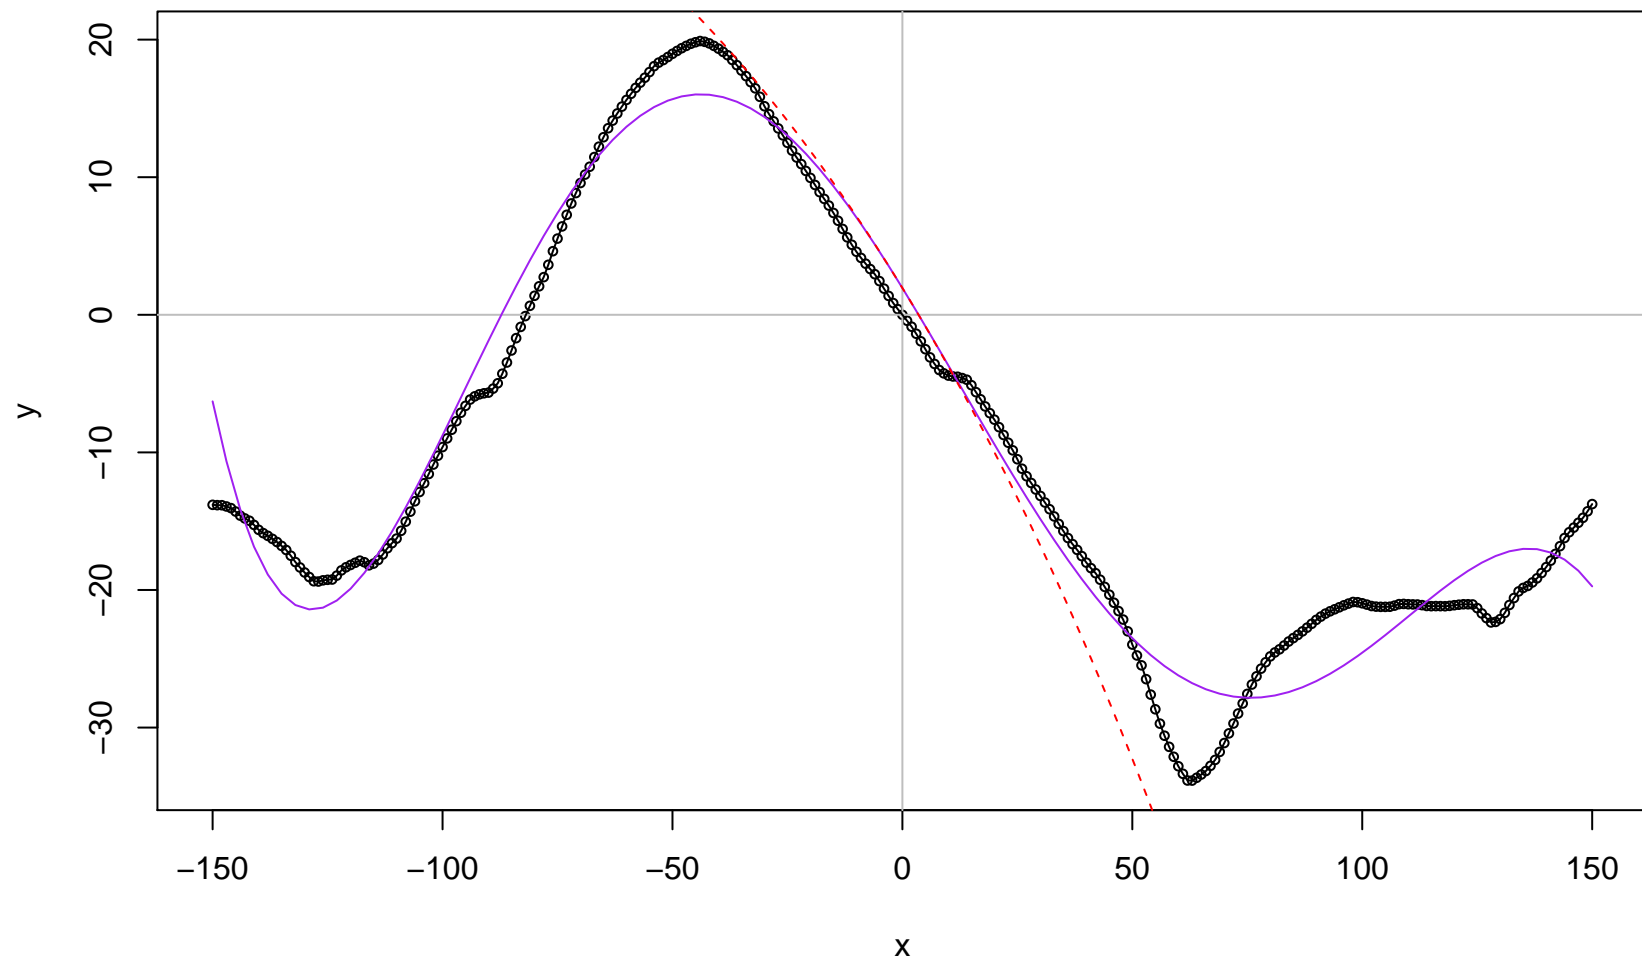



Site 25

$K*100 = -1.5603$

$R^2 = 0.9261$

radius = -64.0895

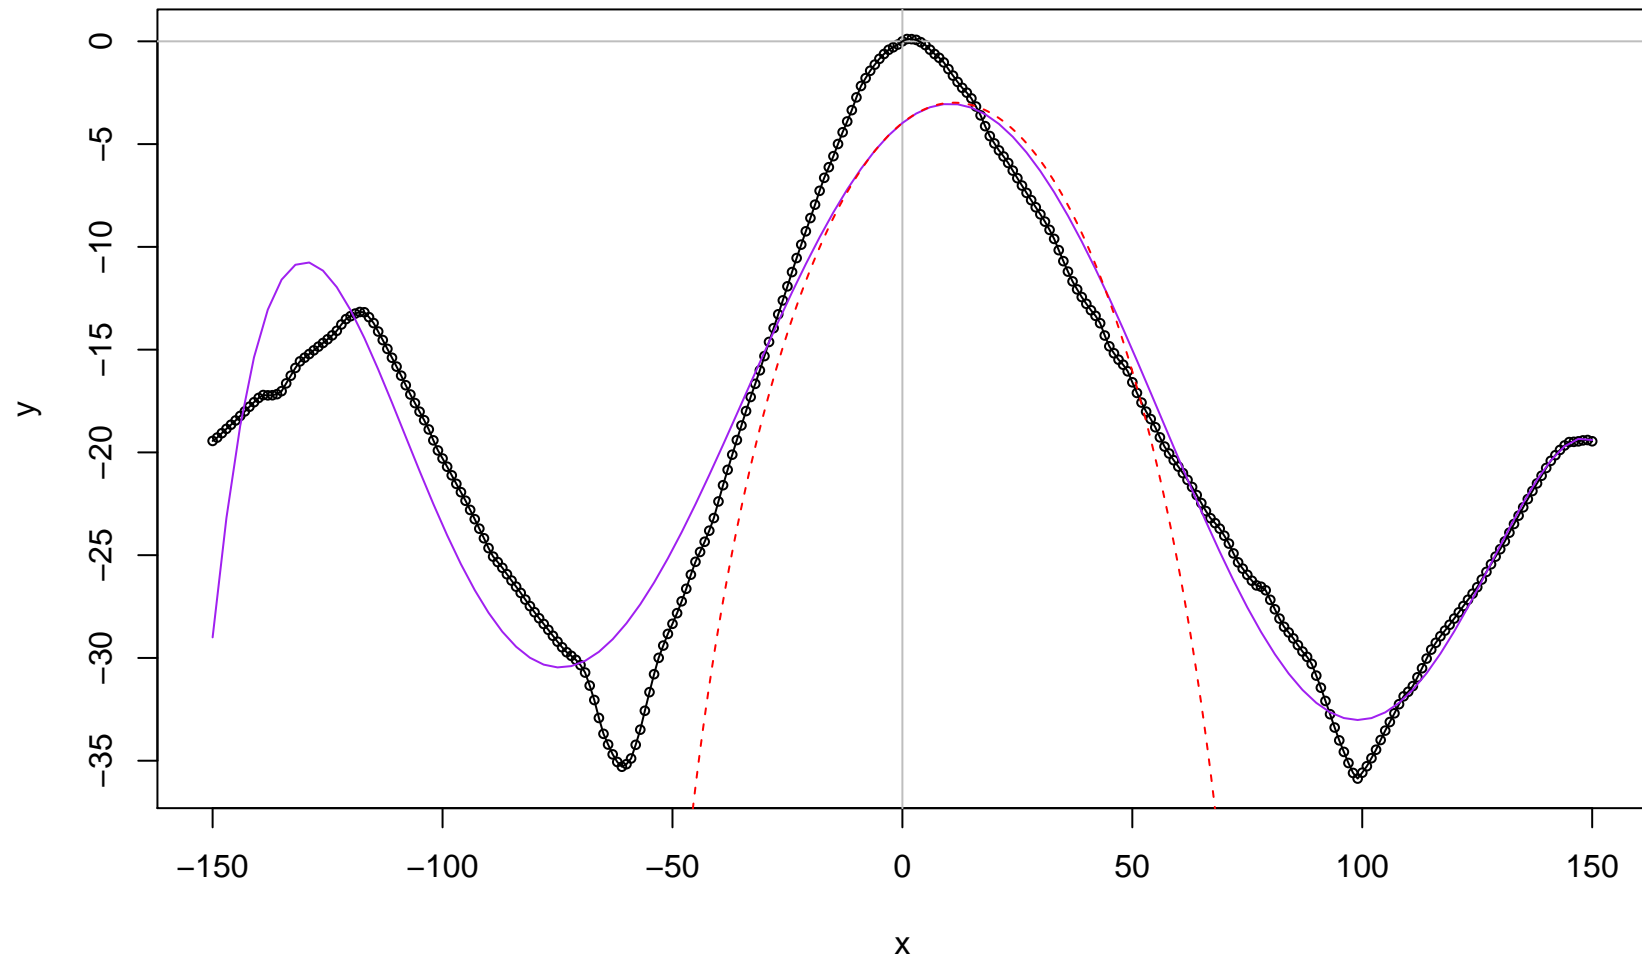

Site 26

$K \cdot 100 = 0.8966$

$R^2 = 0.9615$

radius= 111.5315

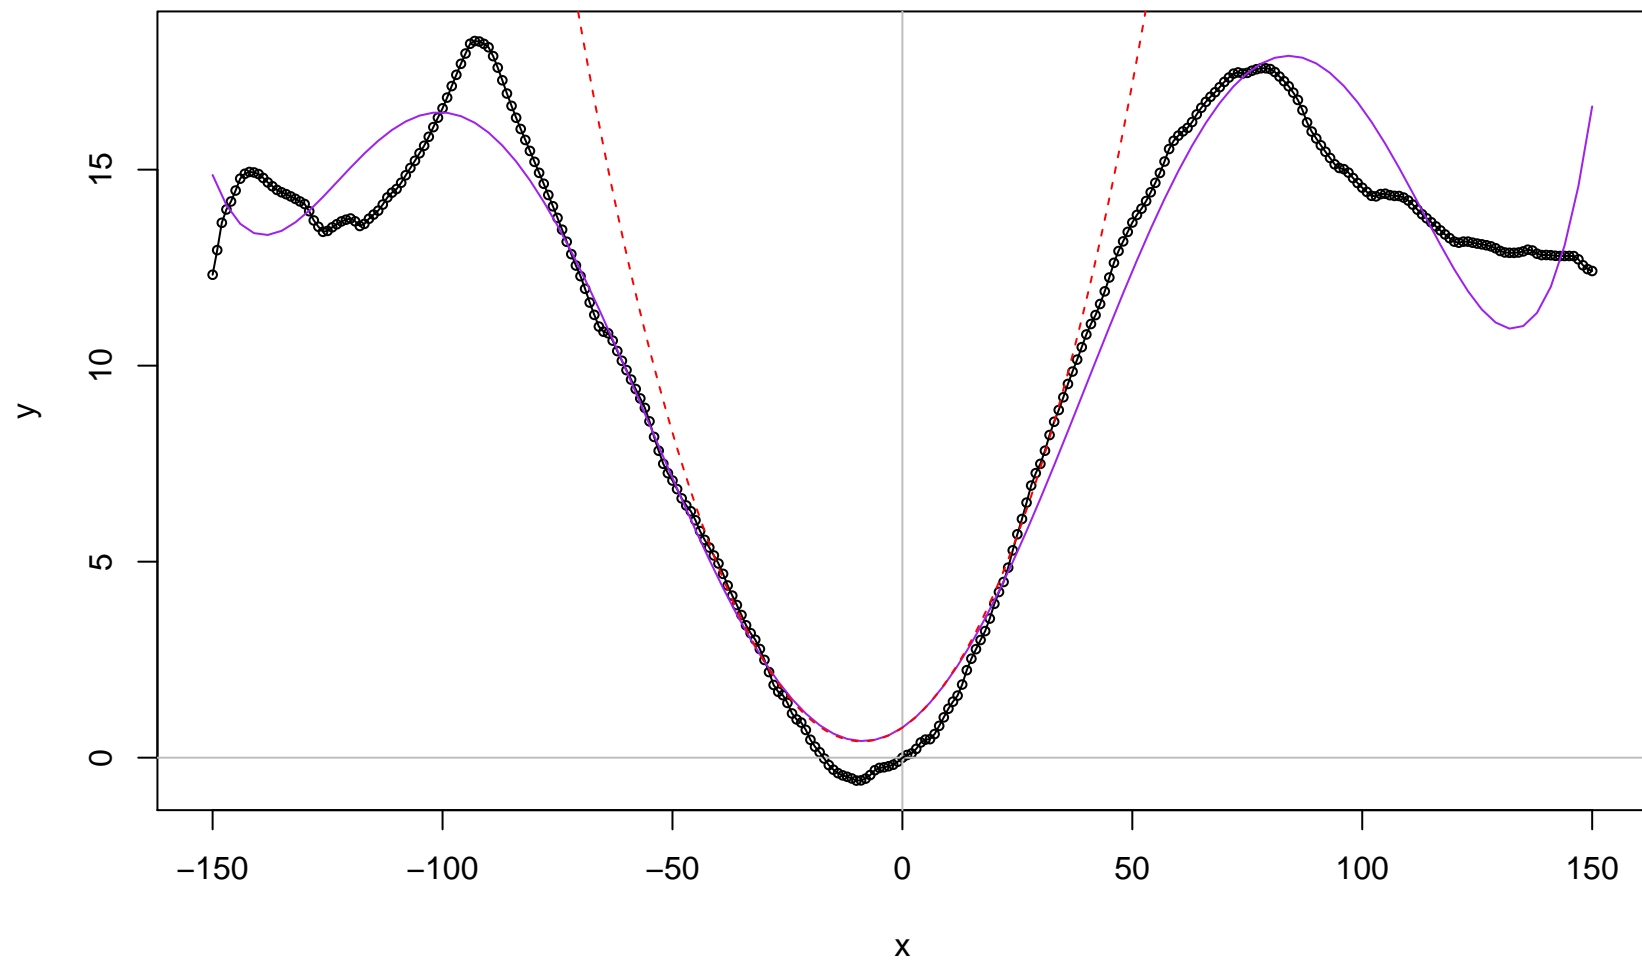

Site 27

$K \cdot 100 = 1.1803$

$R^2 = 0.9121$

radius = 84.7259

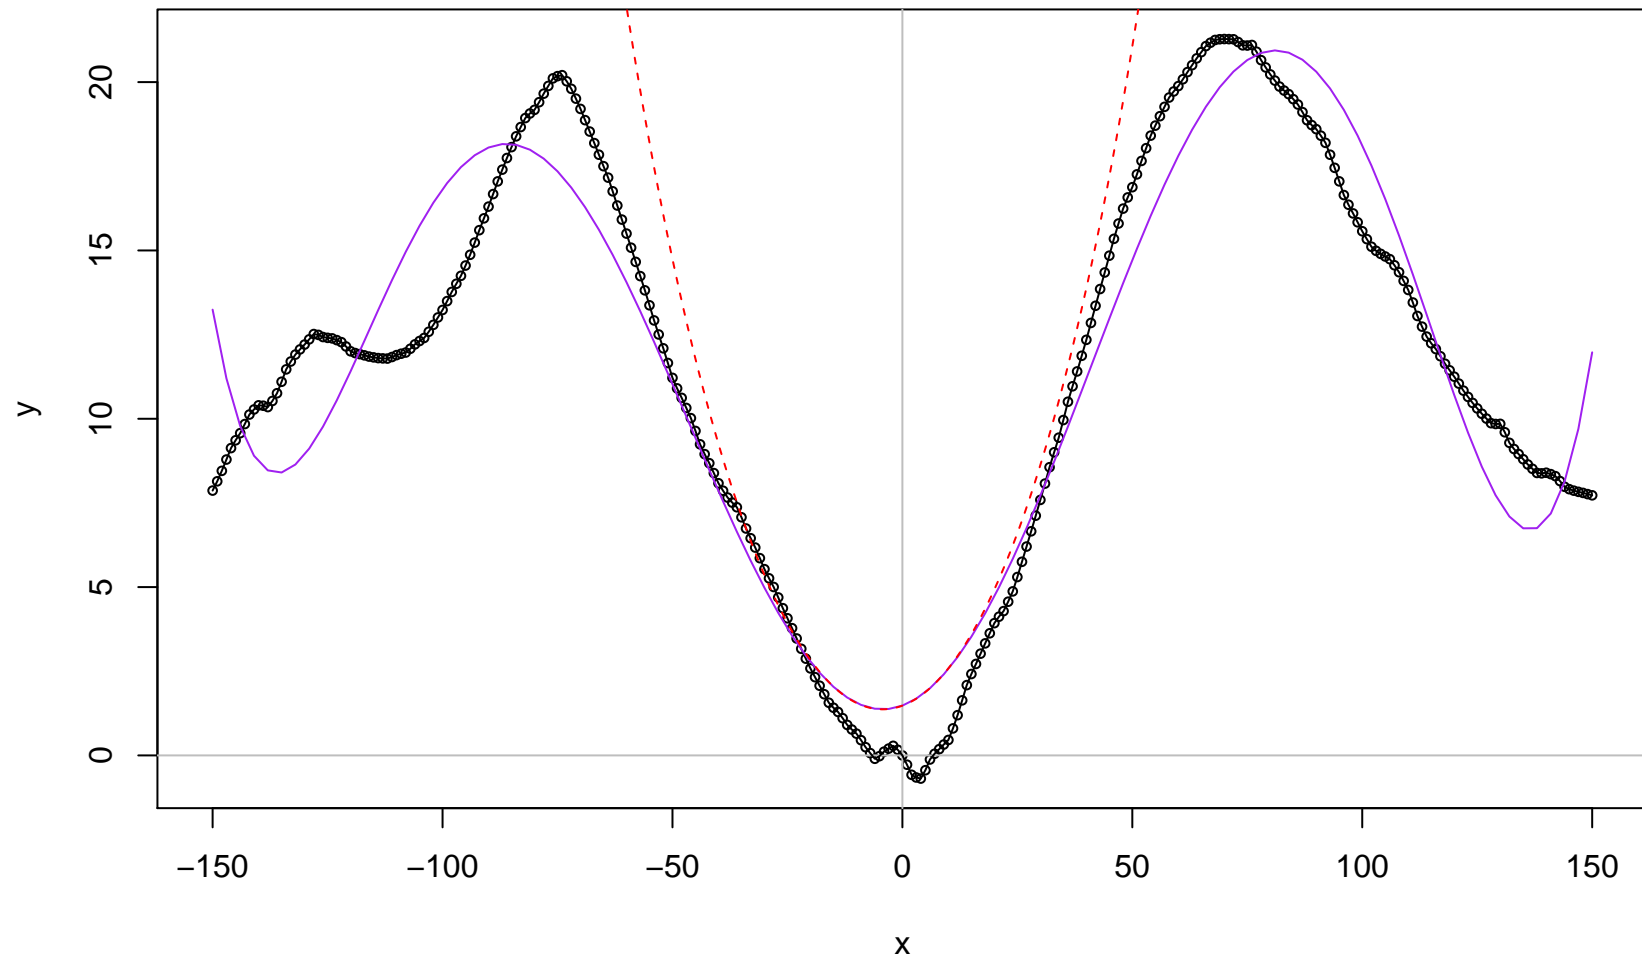

Site 28

$K*100 = -0.5837$

$R^2 = 0.9842$

radius = -171.3227

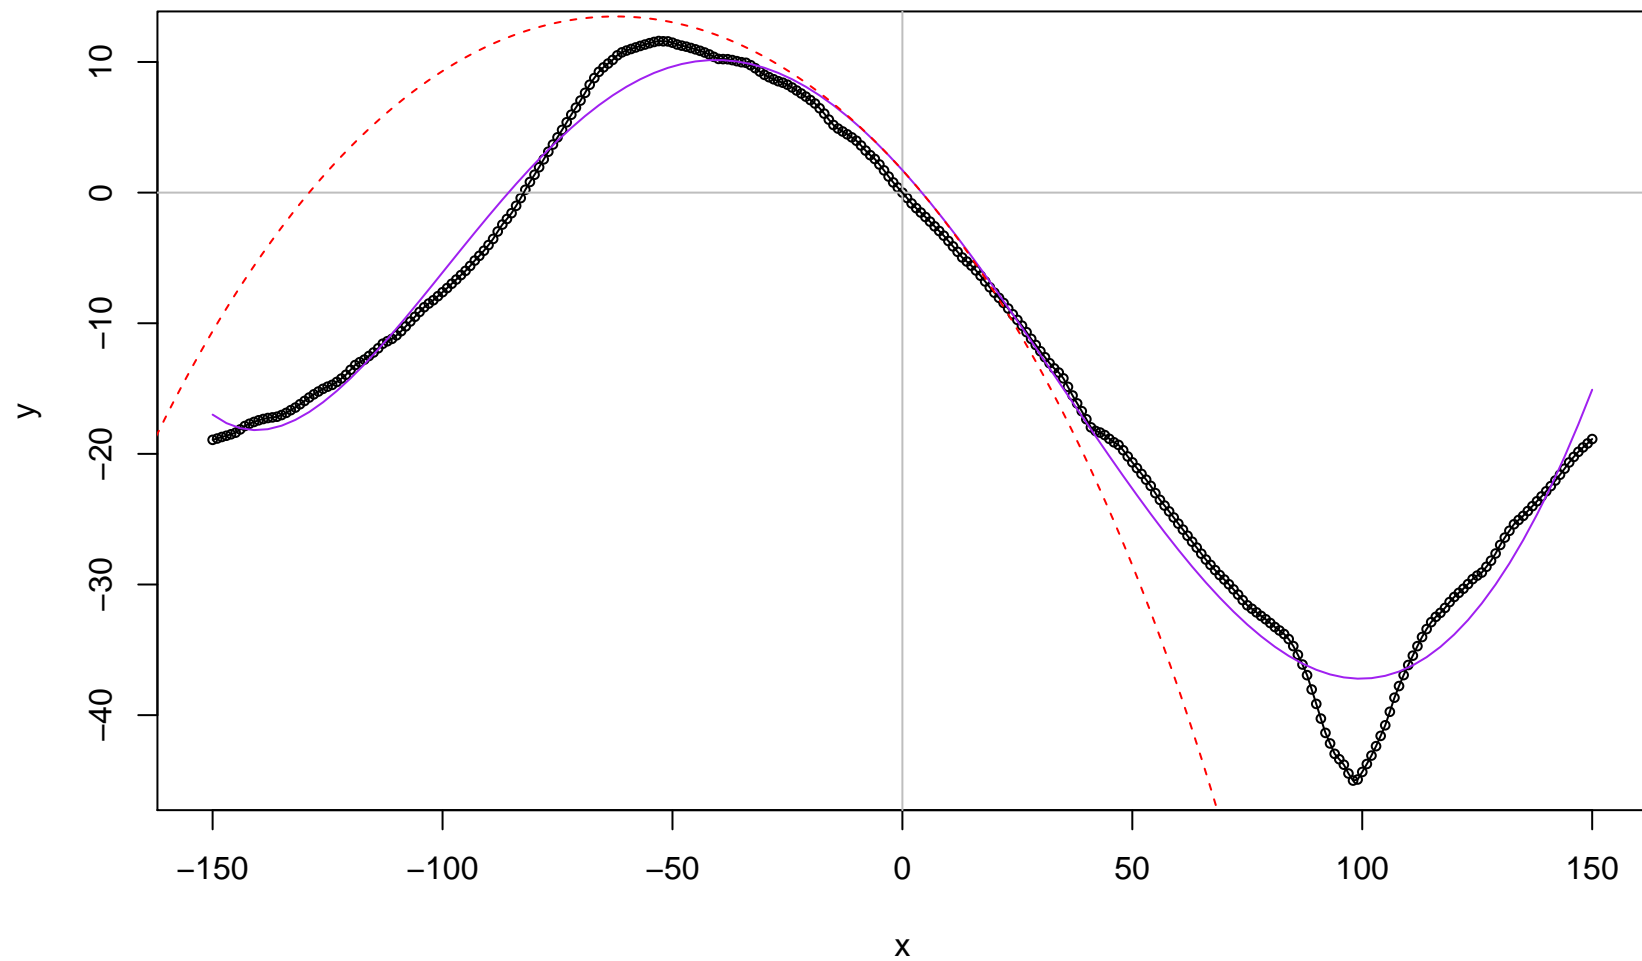

Site 29

$K*100 = -0.4848$

$R^2 = 0.9905$

radius = -206.2549

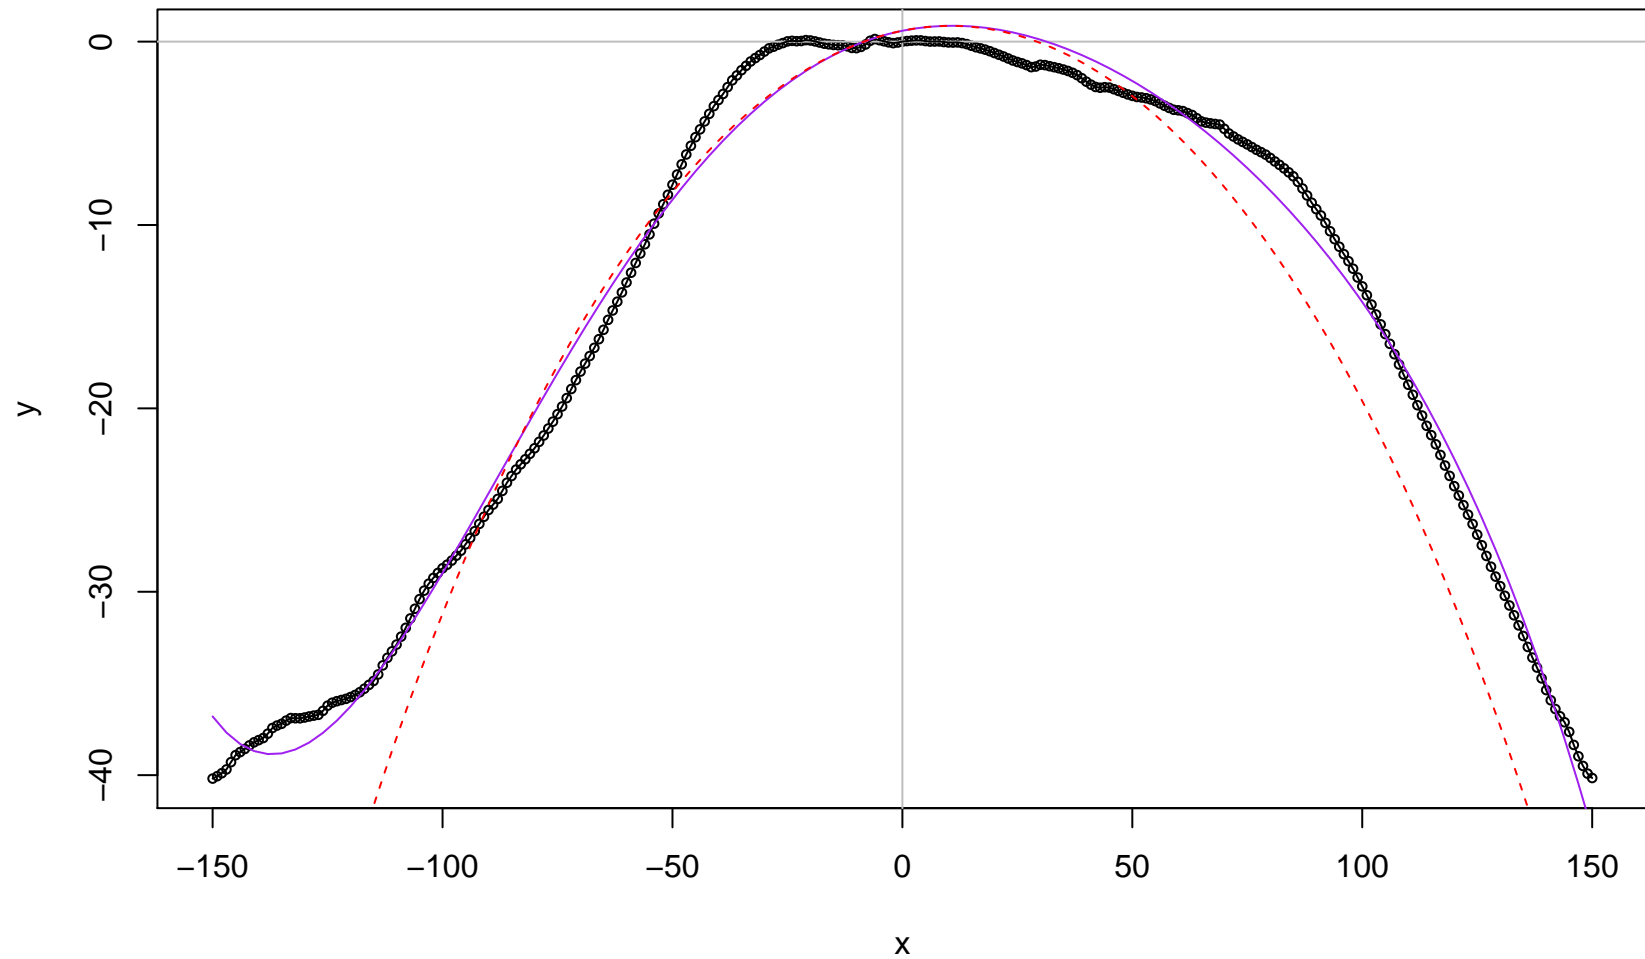

Site 30

$K \cdot 100 = 0.4089$

$R^2 = 0.9859$

radius= 244.5456

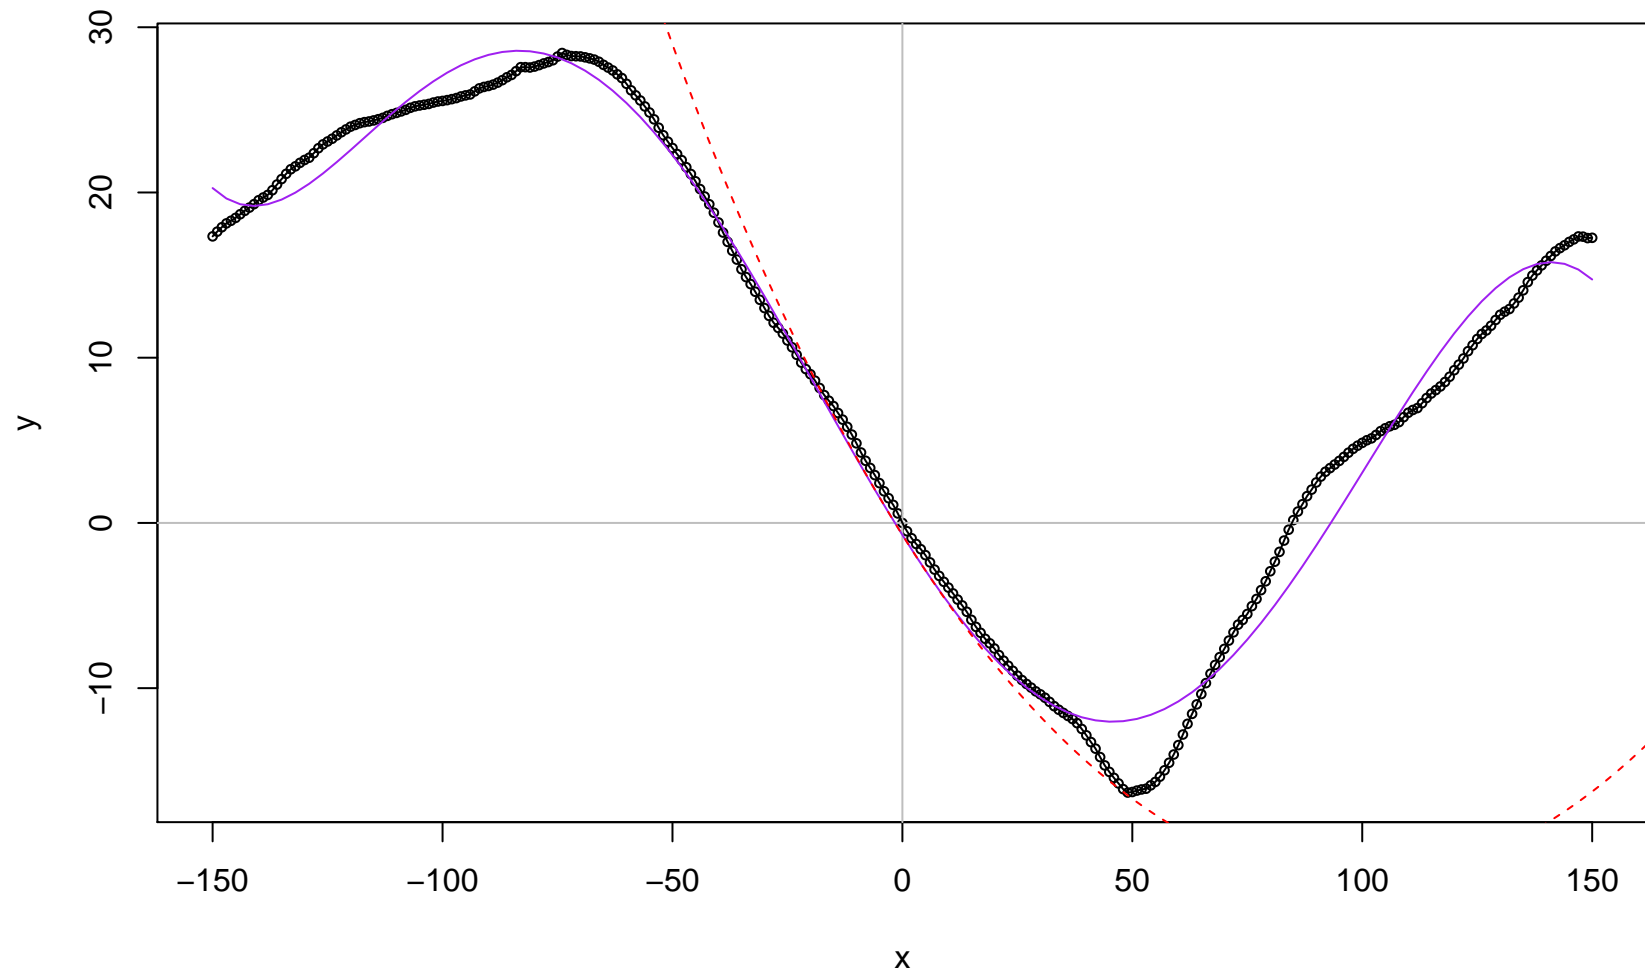

Site 31

$K \cdot 100 = 1.2333$

$R^2 = 0.9896$

radius= 81.0863

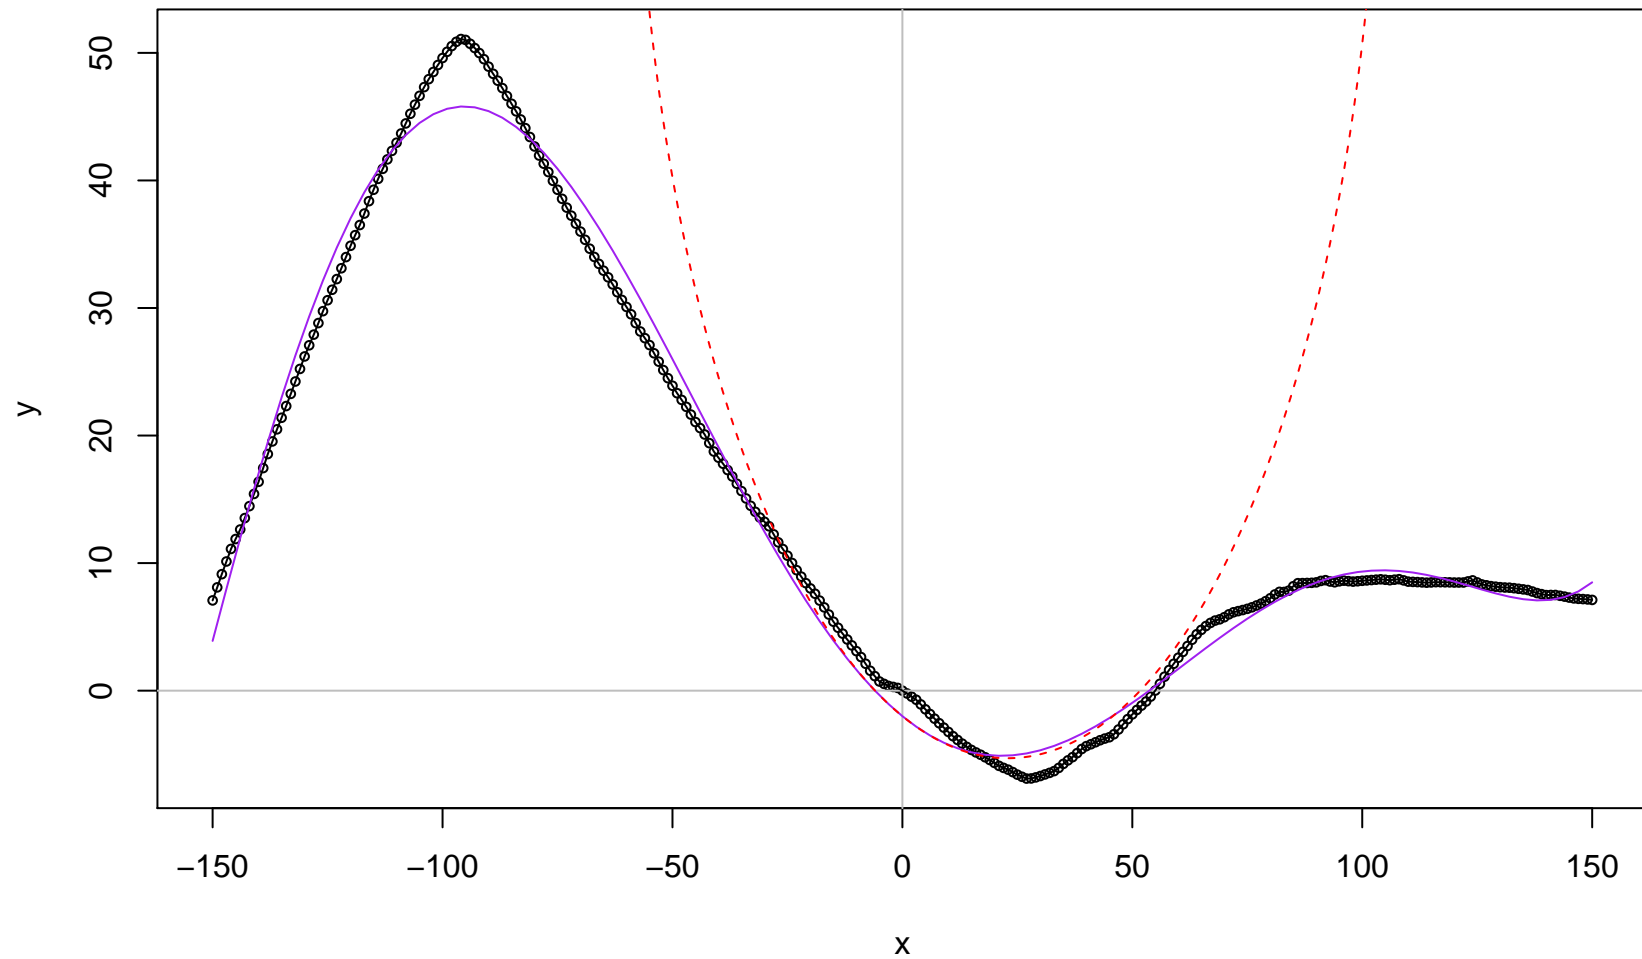

Site 32

$K*100 = -0.5902$

$R^2 = 0.9525$

radius = -169.4242

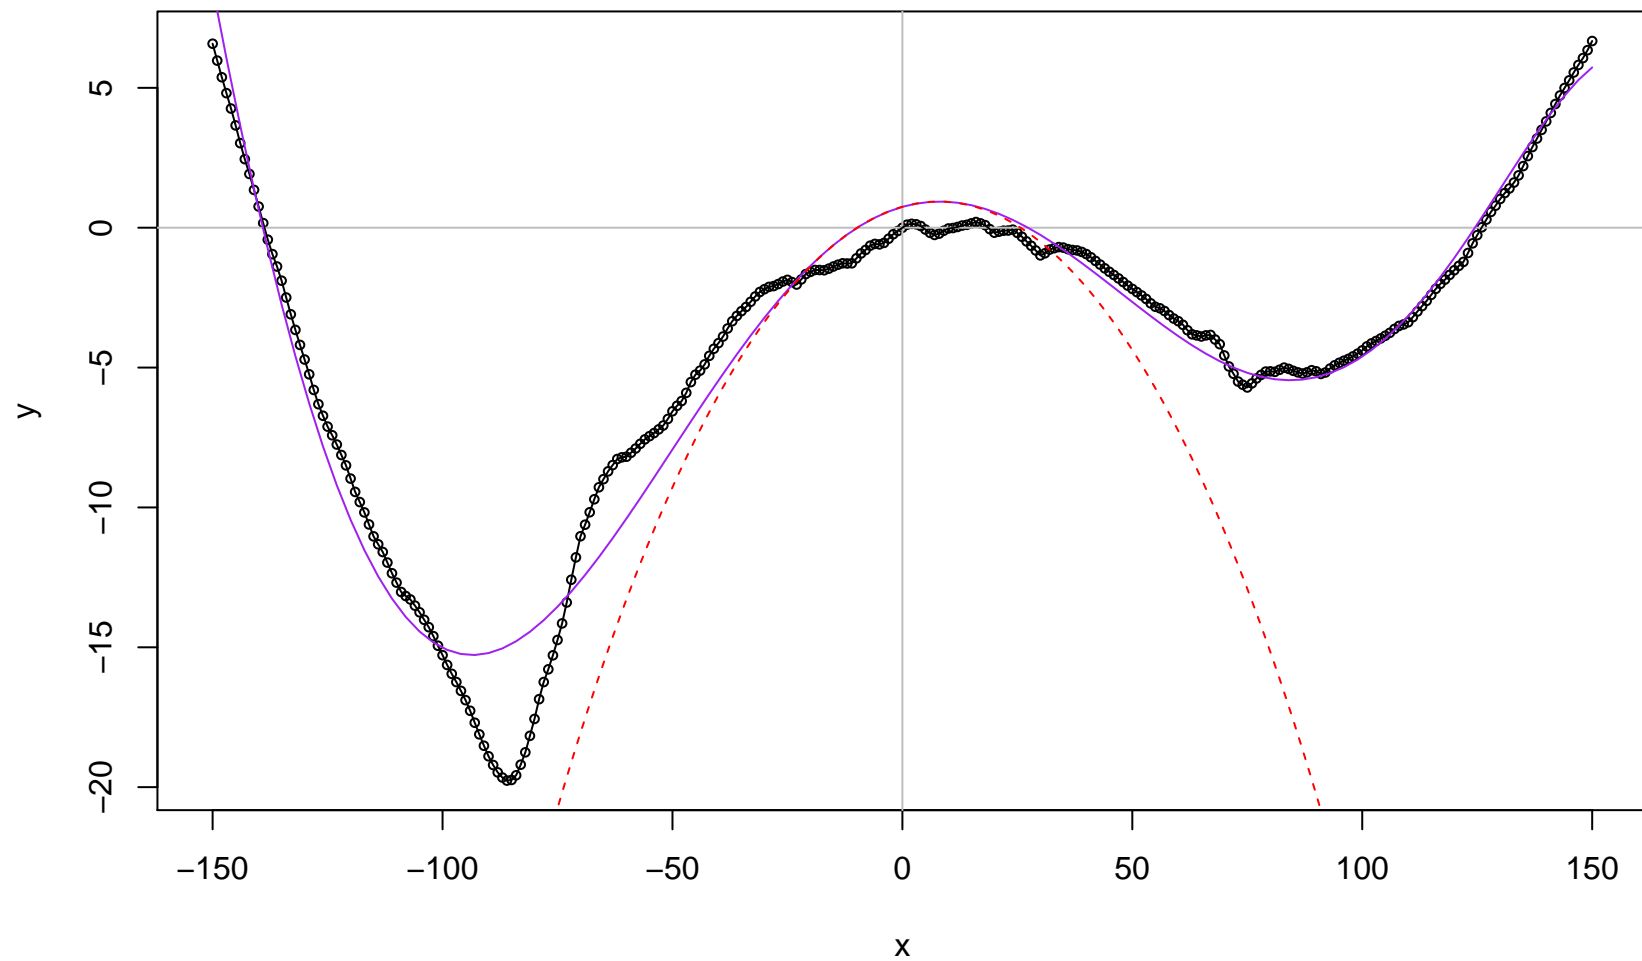



Site 33

$K*100= 0.4944$

$R^2= 0.9923$

radius= 202.2711

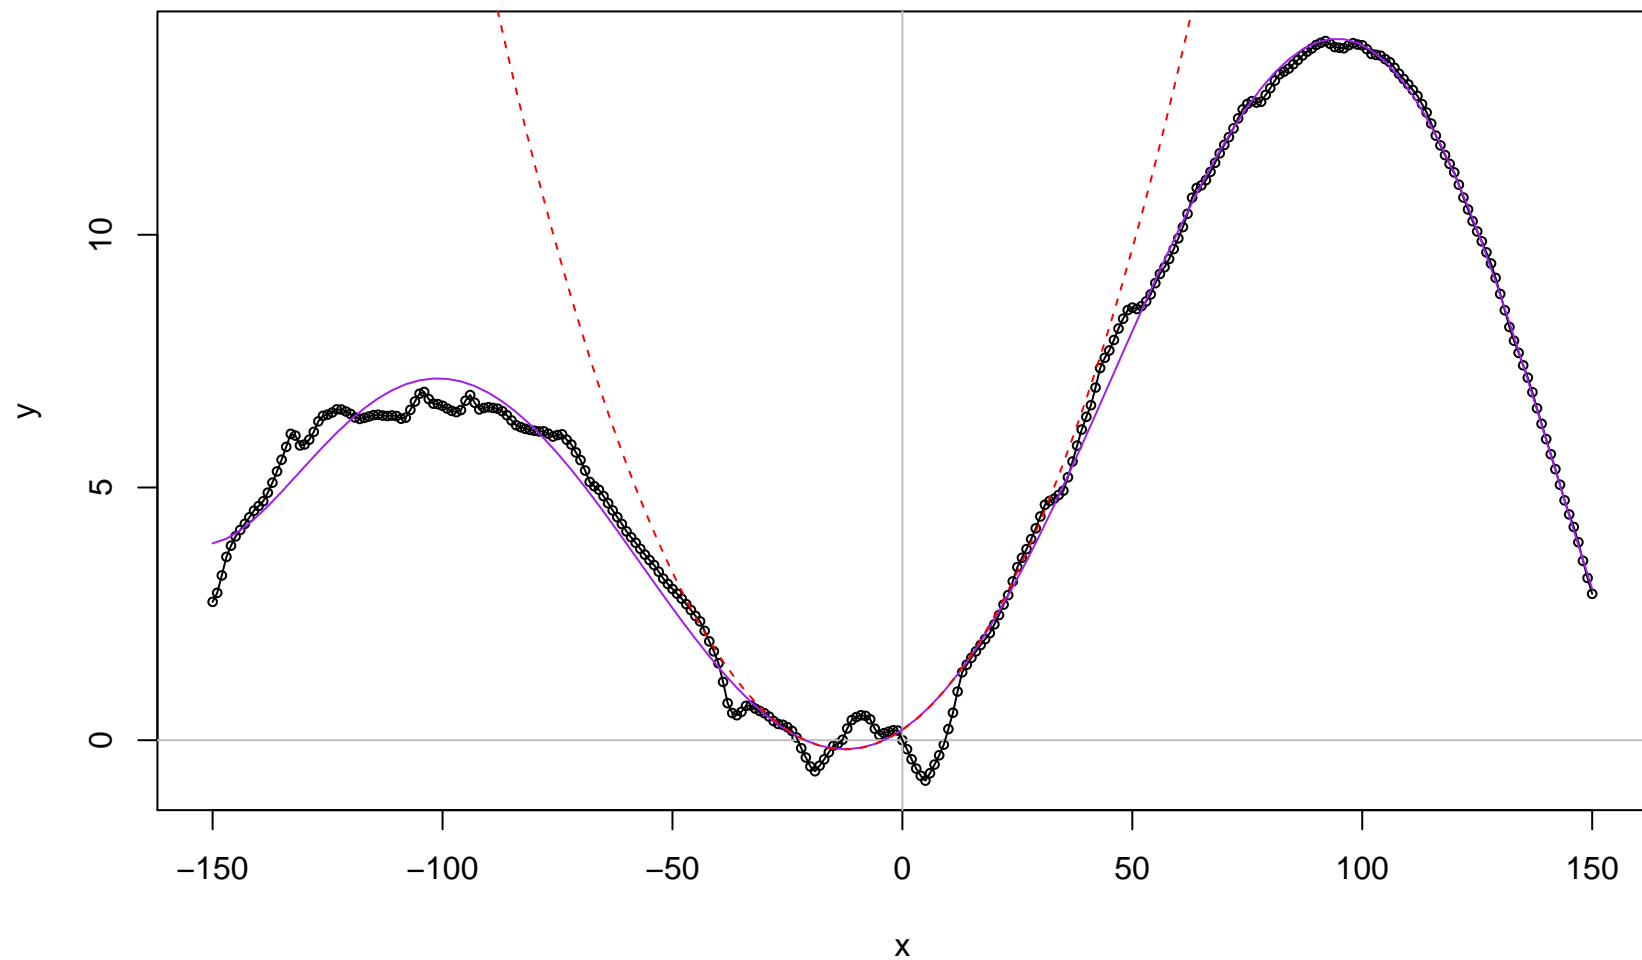

Site 34

$K*100= 2.0009$

$R^2= 0.993$

radius= 49.9768

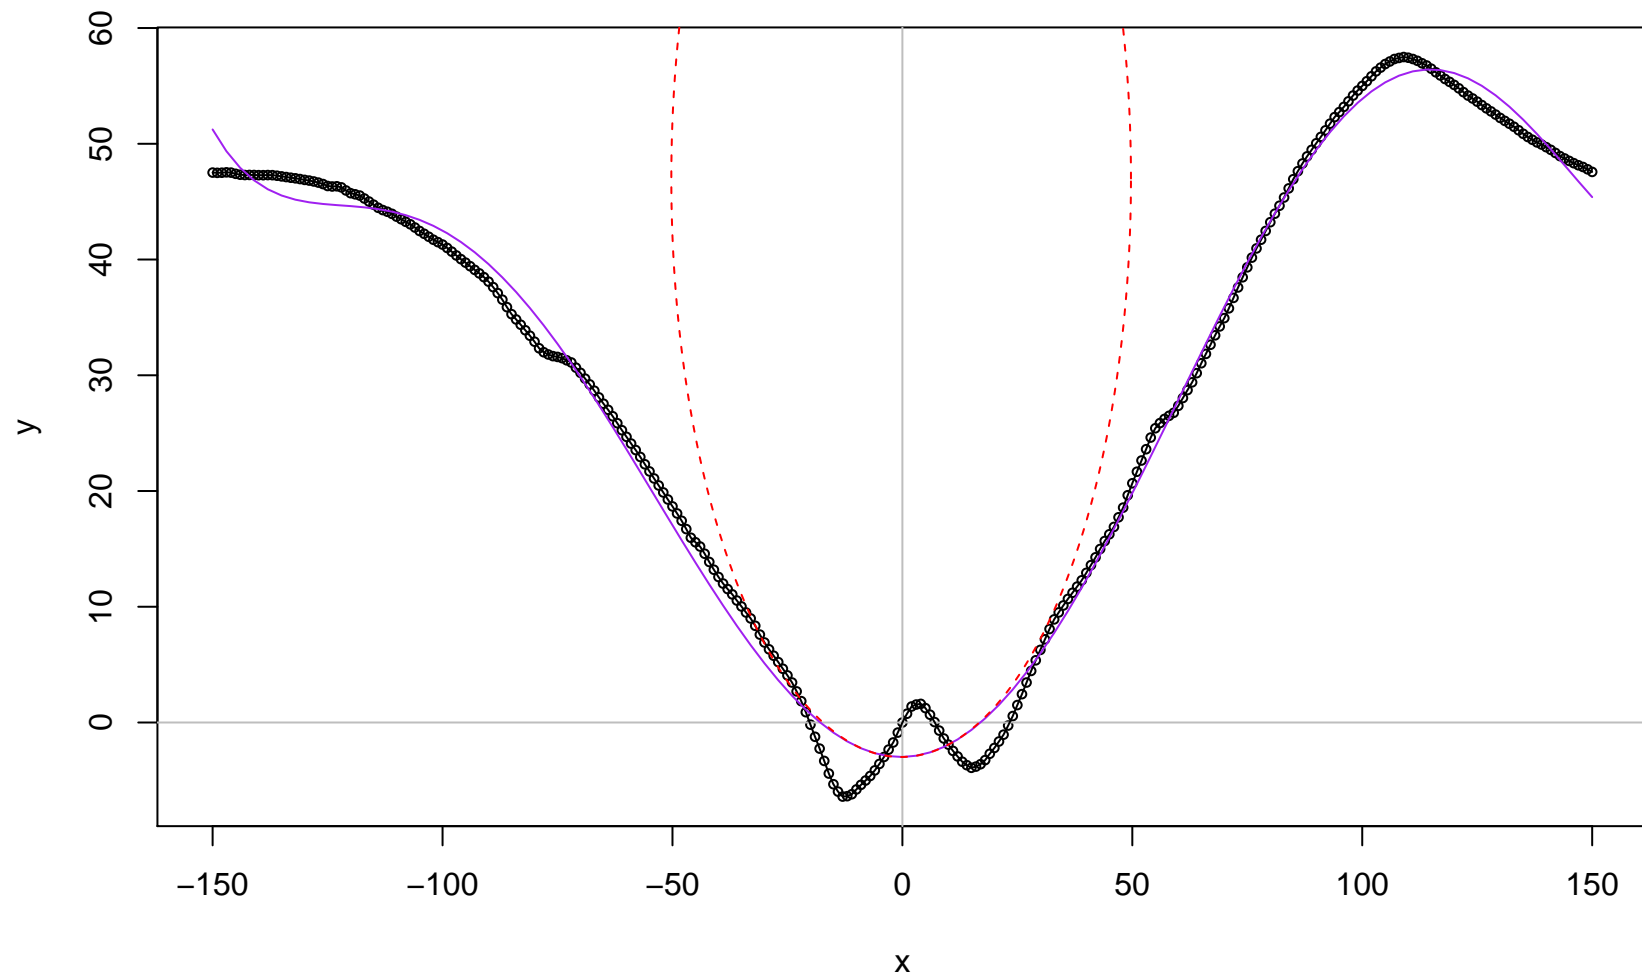

Site 35

$K*100= 1.851$

$R^2= 0.9698$

radius= 54.0235

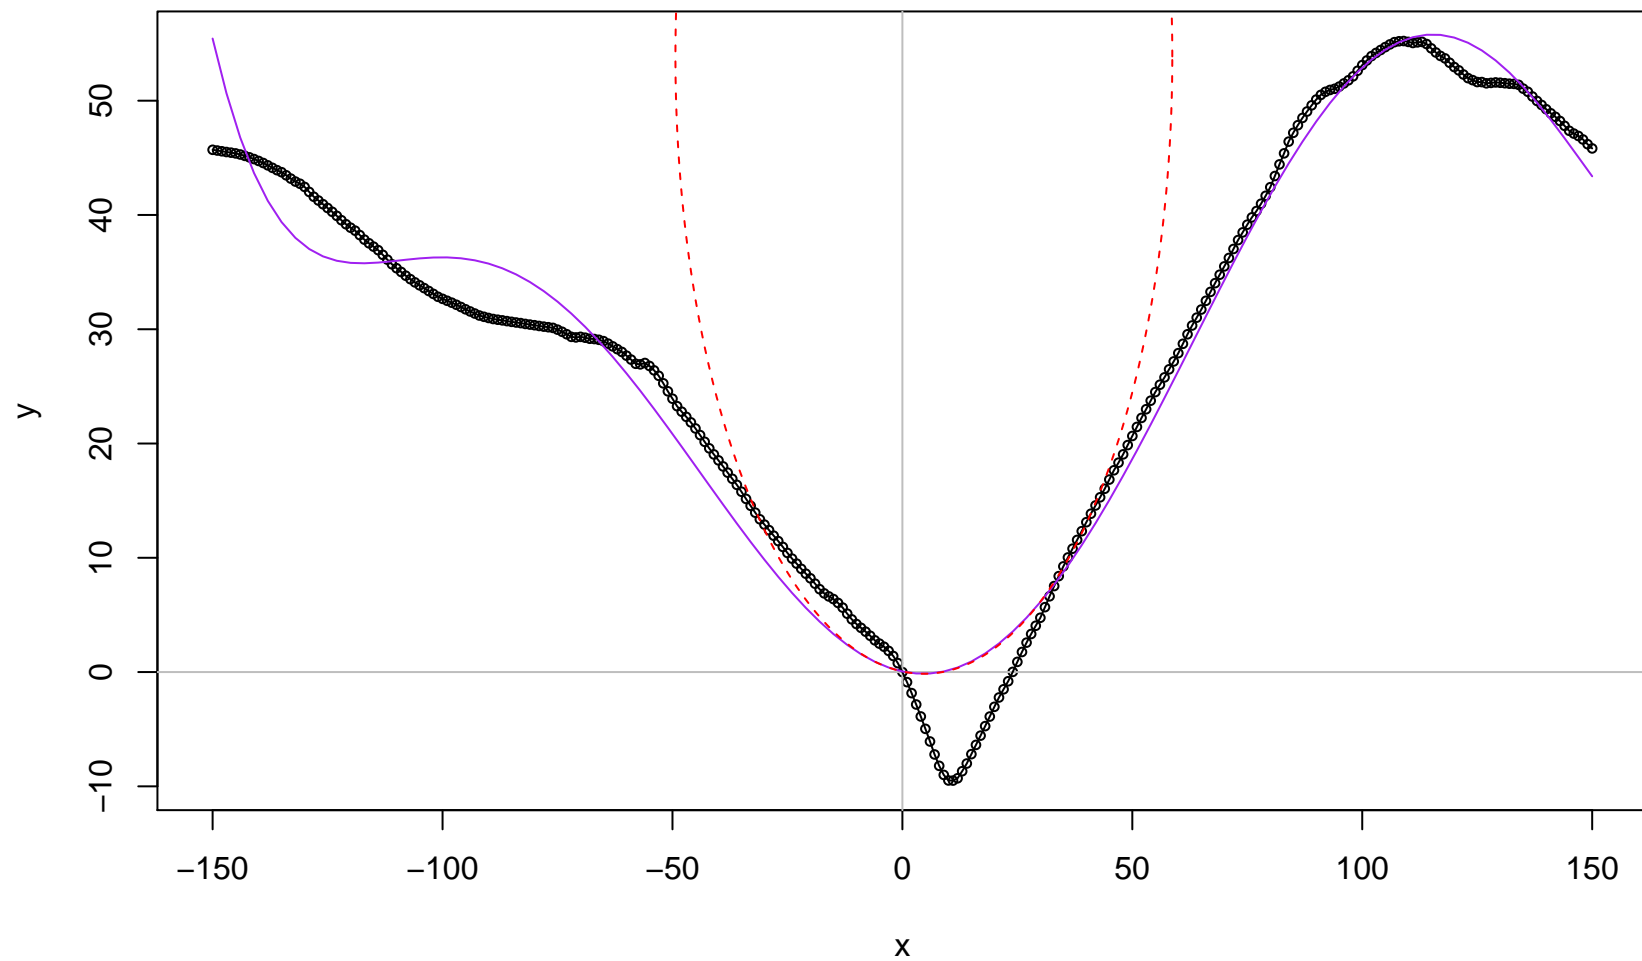

Site 36

$K*100= 1.8566$

$R^2= 0.9588$

radius= 53.8605

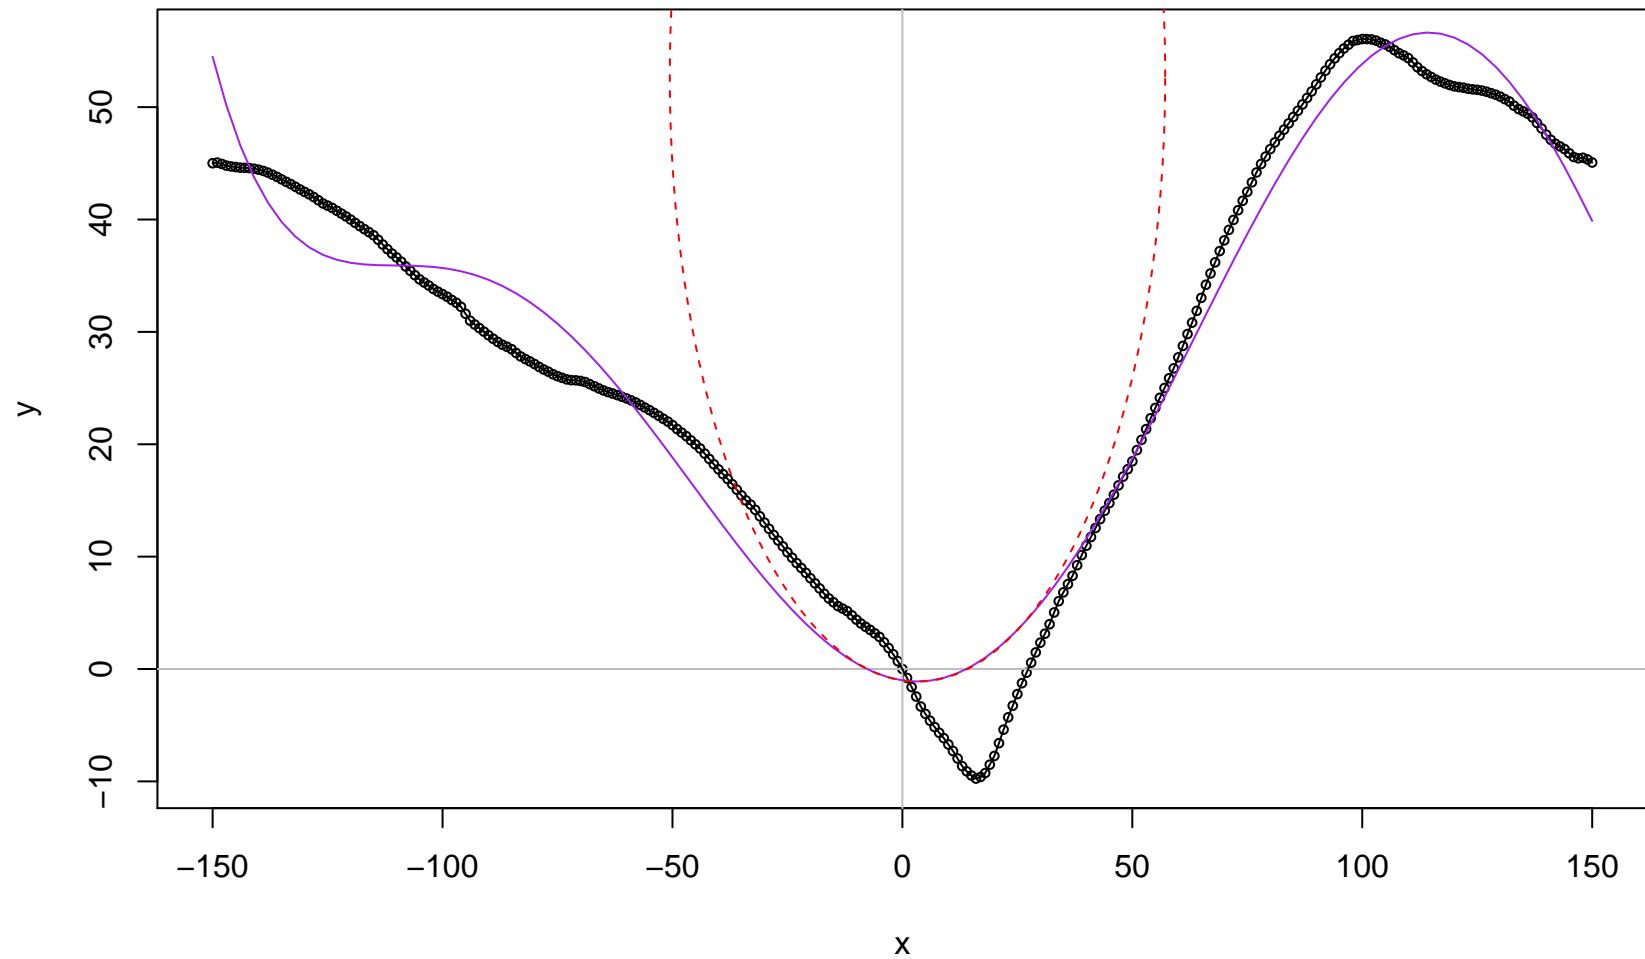

Site 37

$K*100 = -0.9451$

$R^2 = 0.9666$

radius =  $-105.8067$

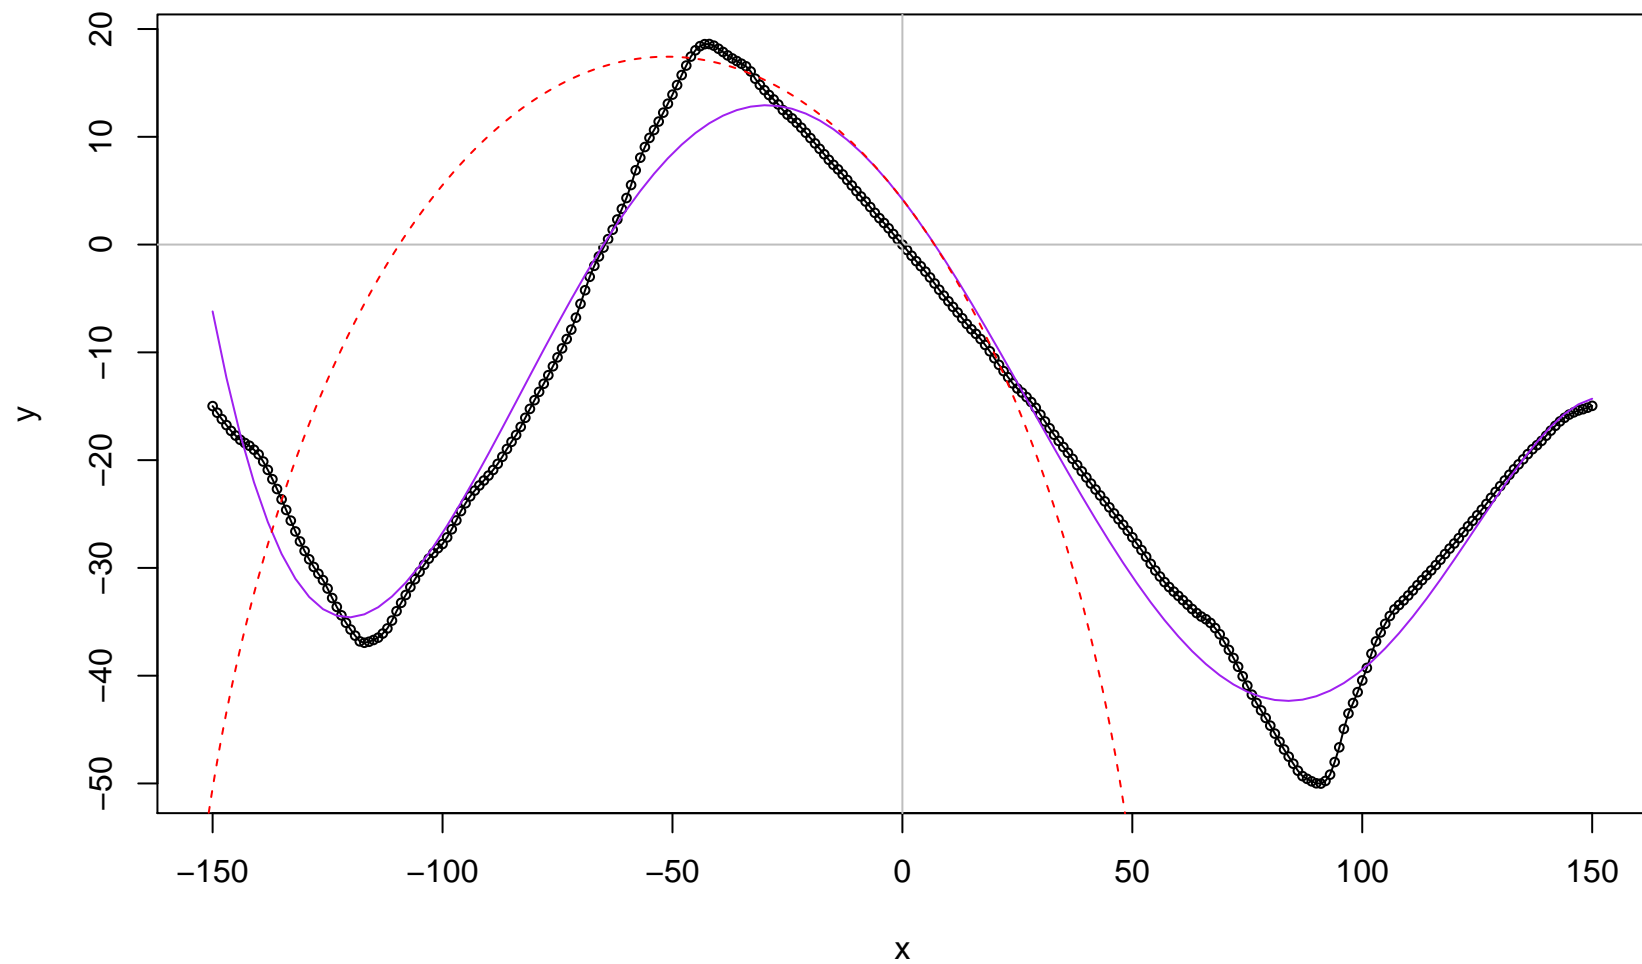

Site 38

$K*100 = -1.4986$

$R^2 = 0.9488$

radius =  $-66.7299$

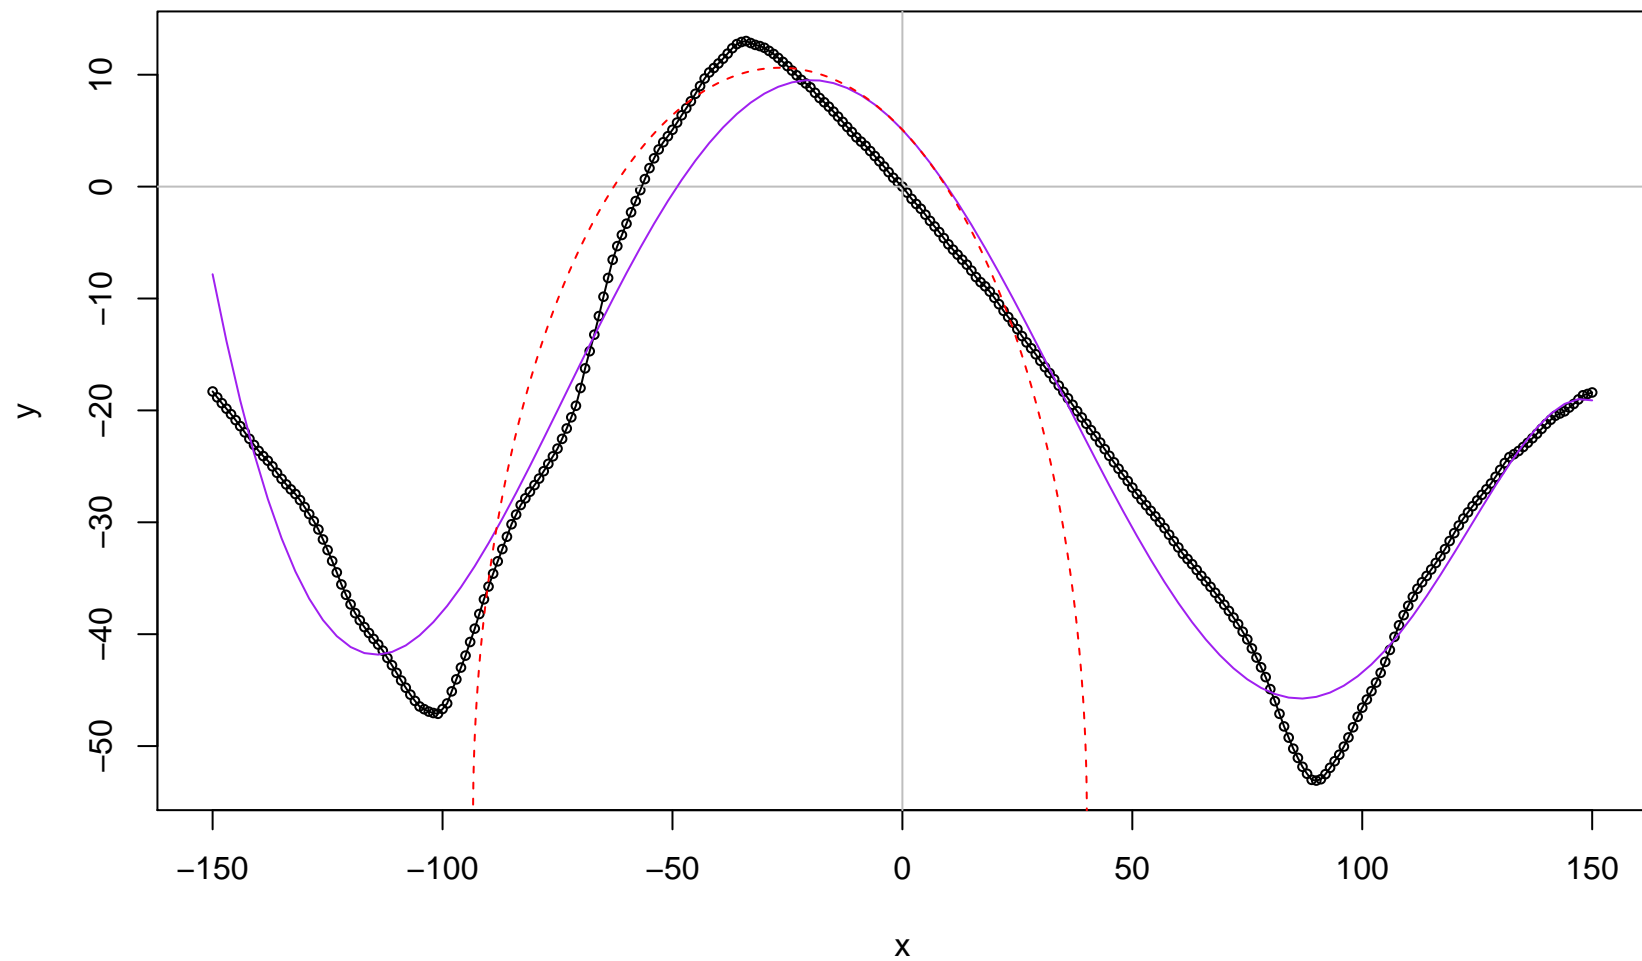

Site 39

$K \cdot 100 = -0.1565$

$R^2 = 0.9816$

radius =  $-638.964$

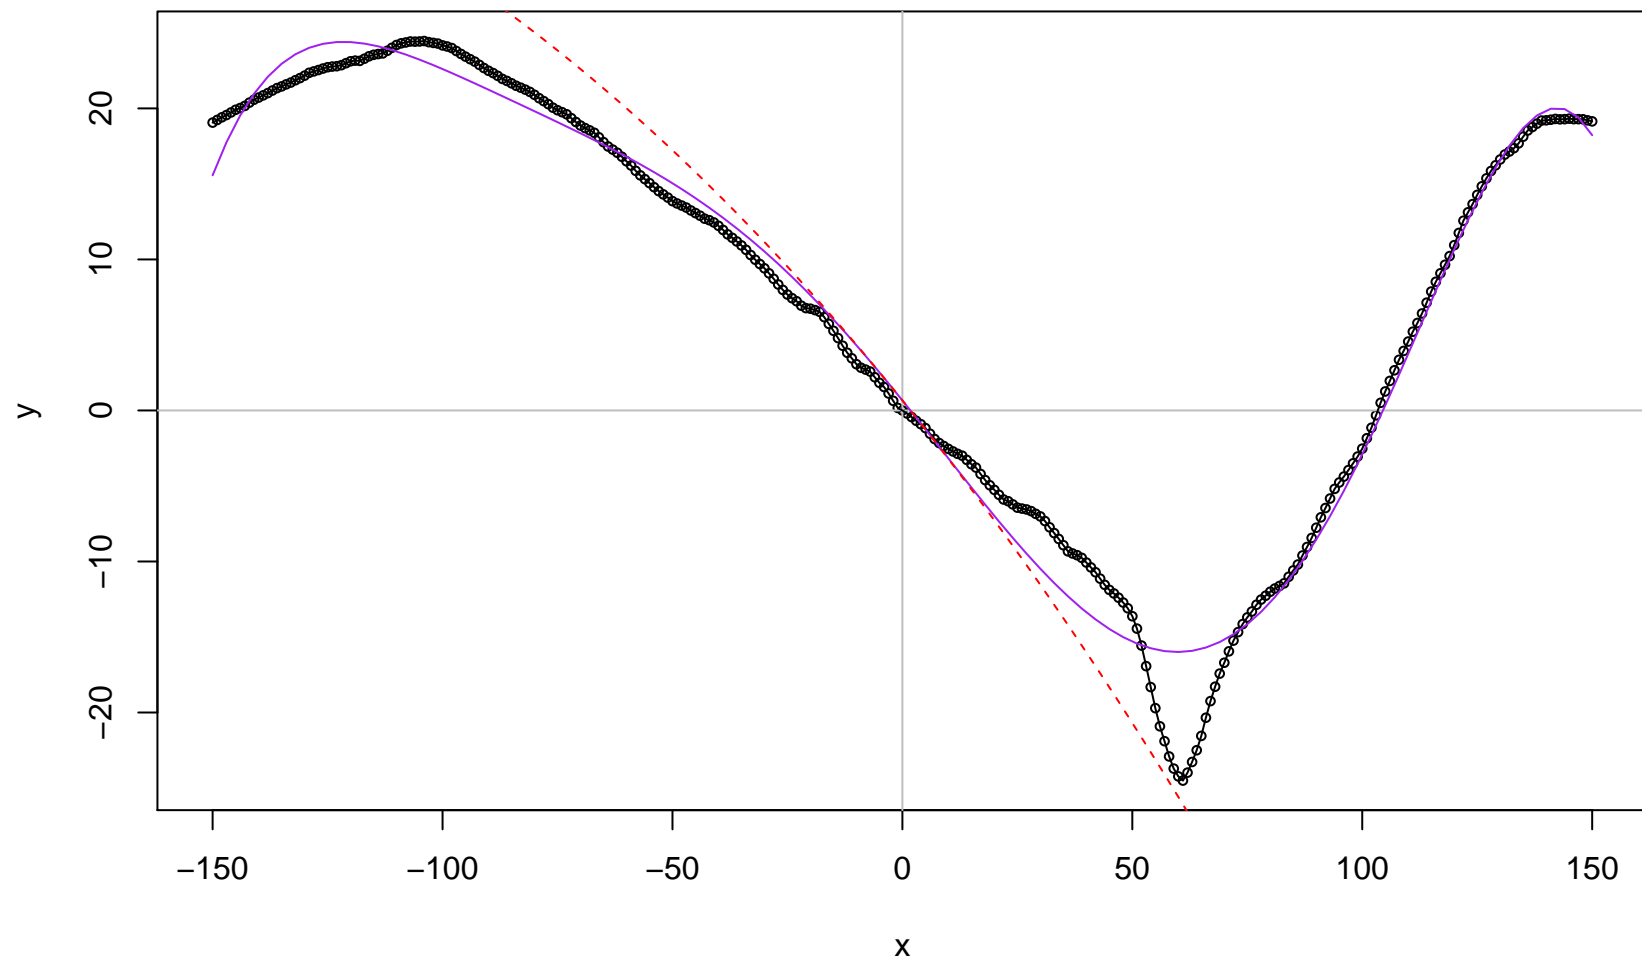

Site 40

$K \cdot 100 = 1.3563$

$R^2 = 0.9594$

radius= 73.7311

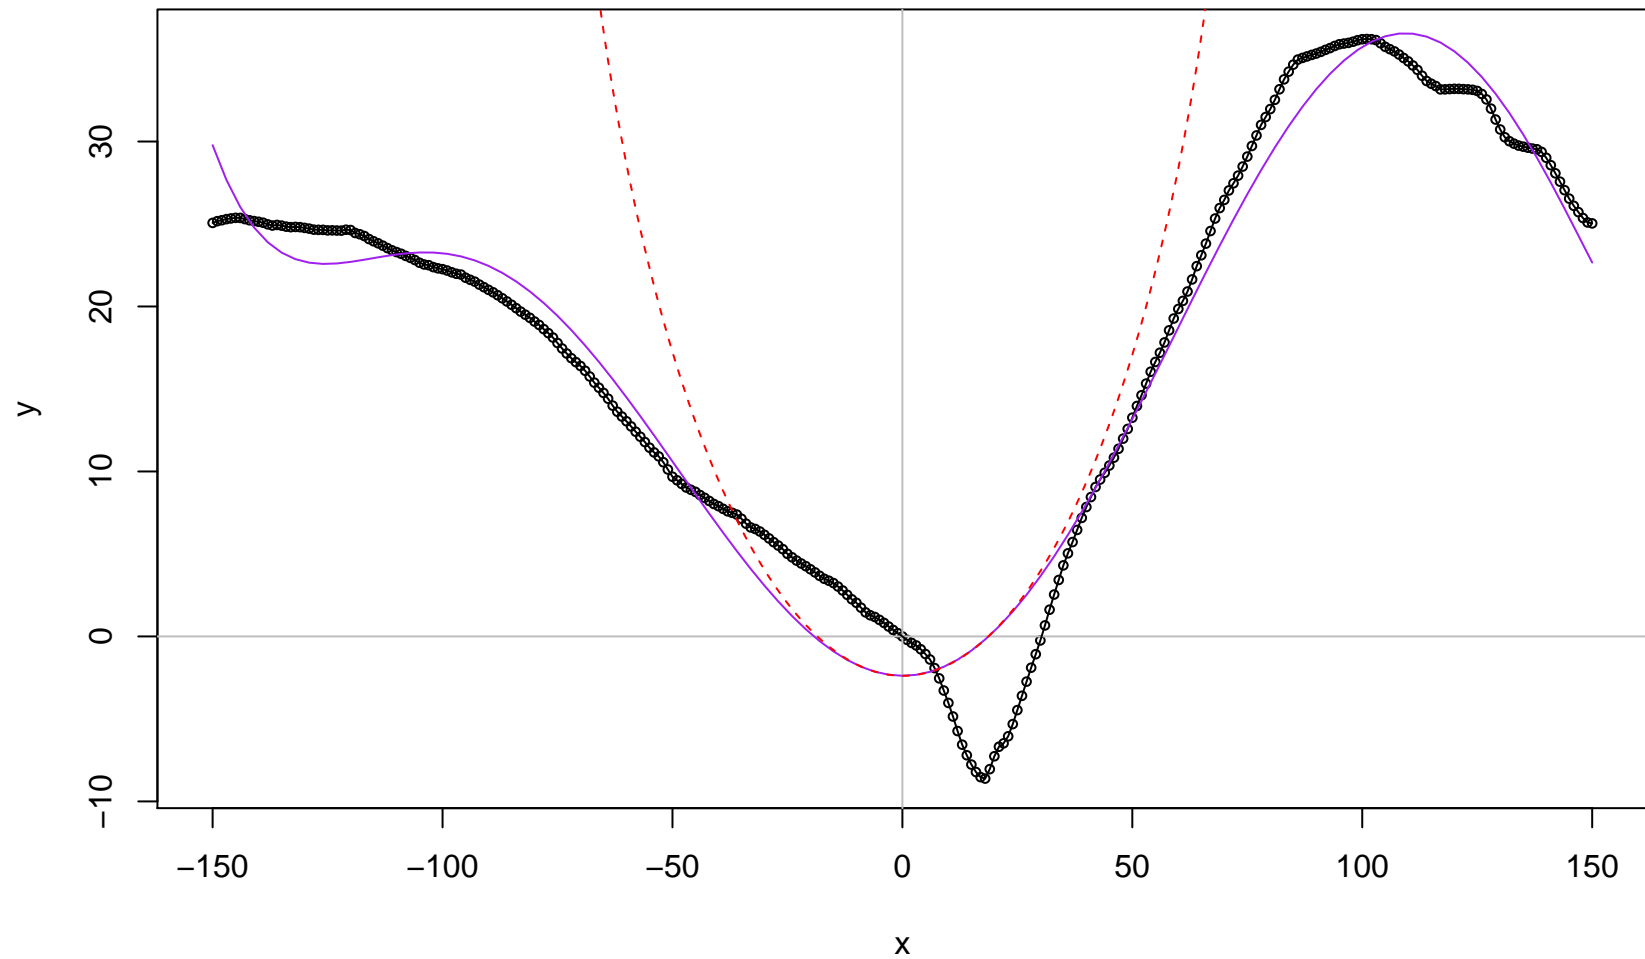



Site 41

$K*100 = -0.4051$

$R^2 = 0.9915$

radius =  $-246.8373$

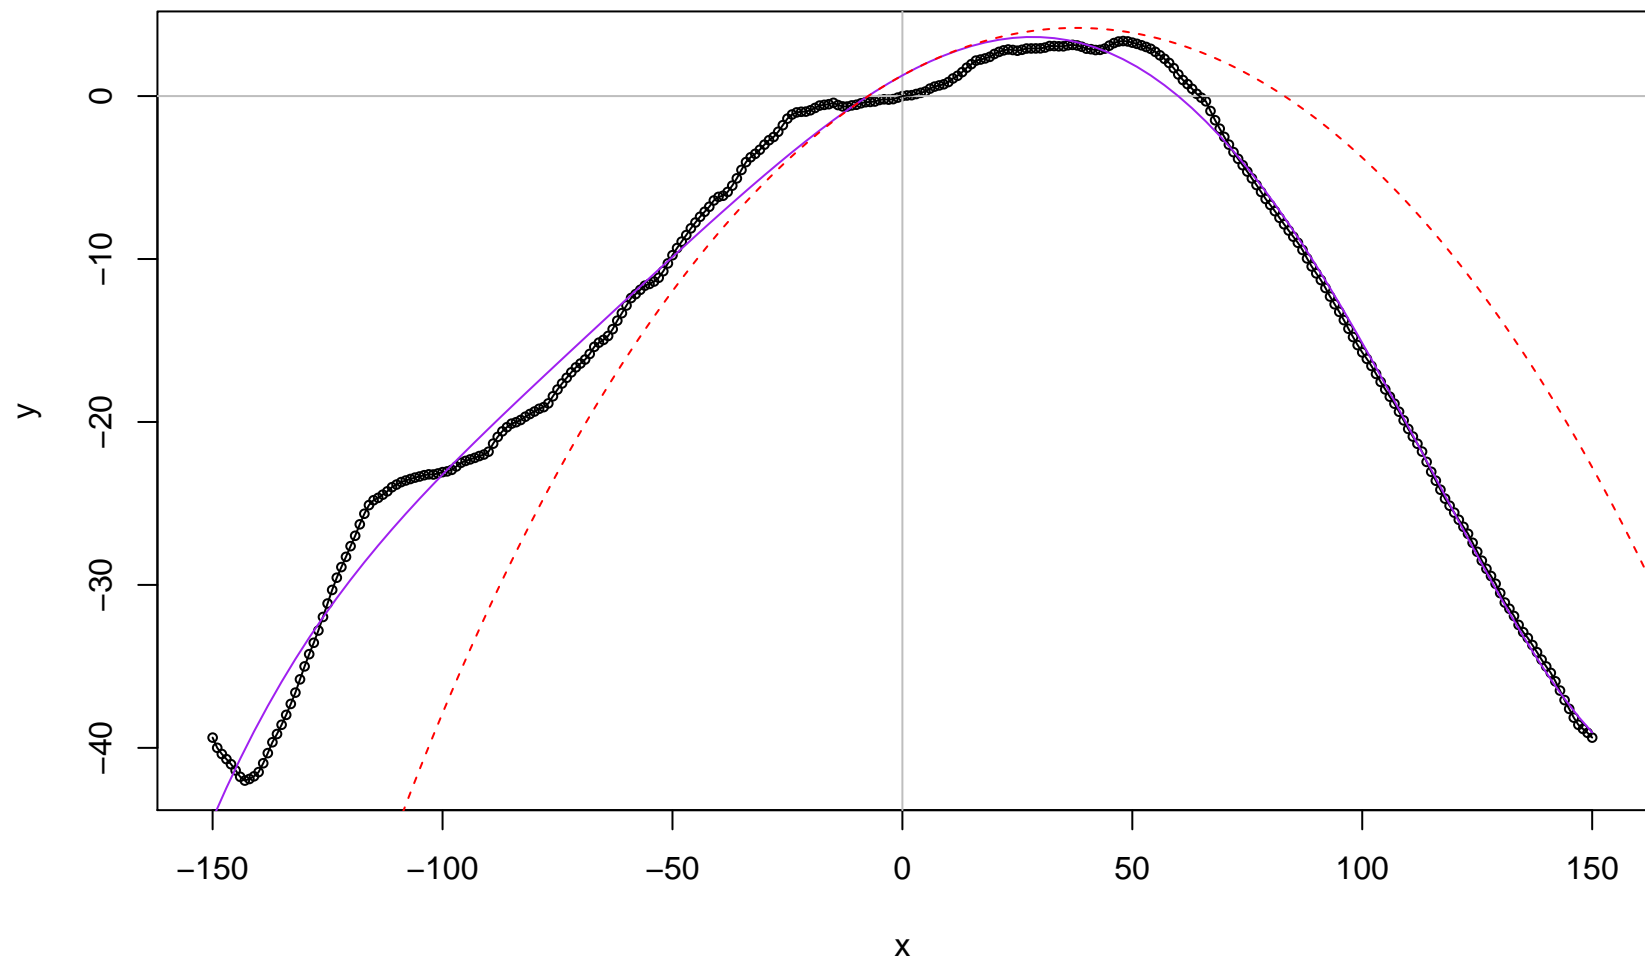

Site 42

$K \cdot 100 = 0.6492$

$R^2 = 0.9793$

radius= 154.0273

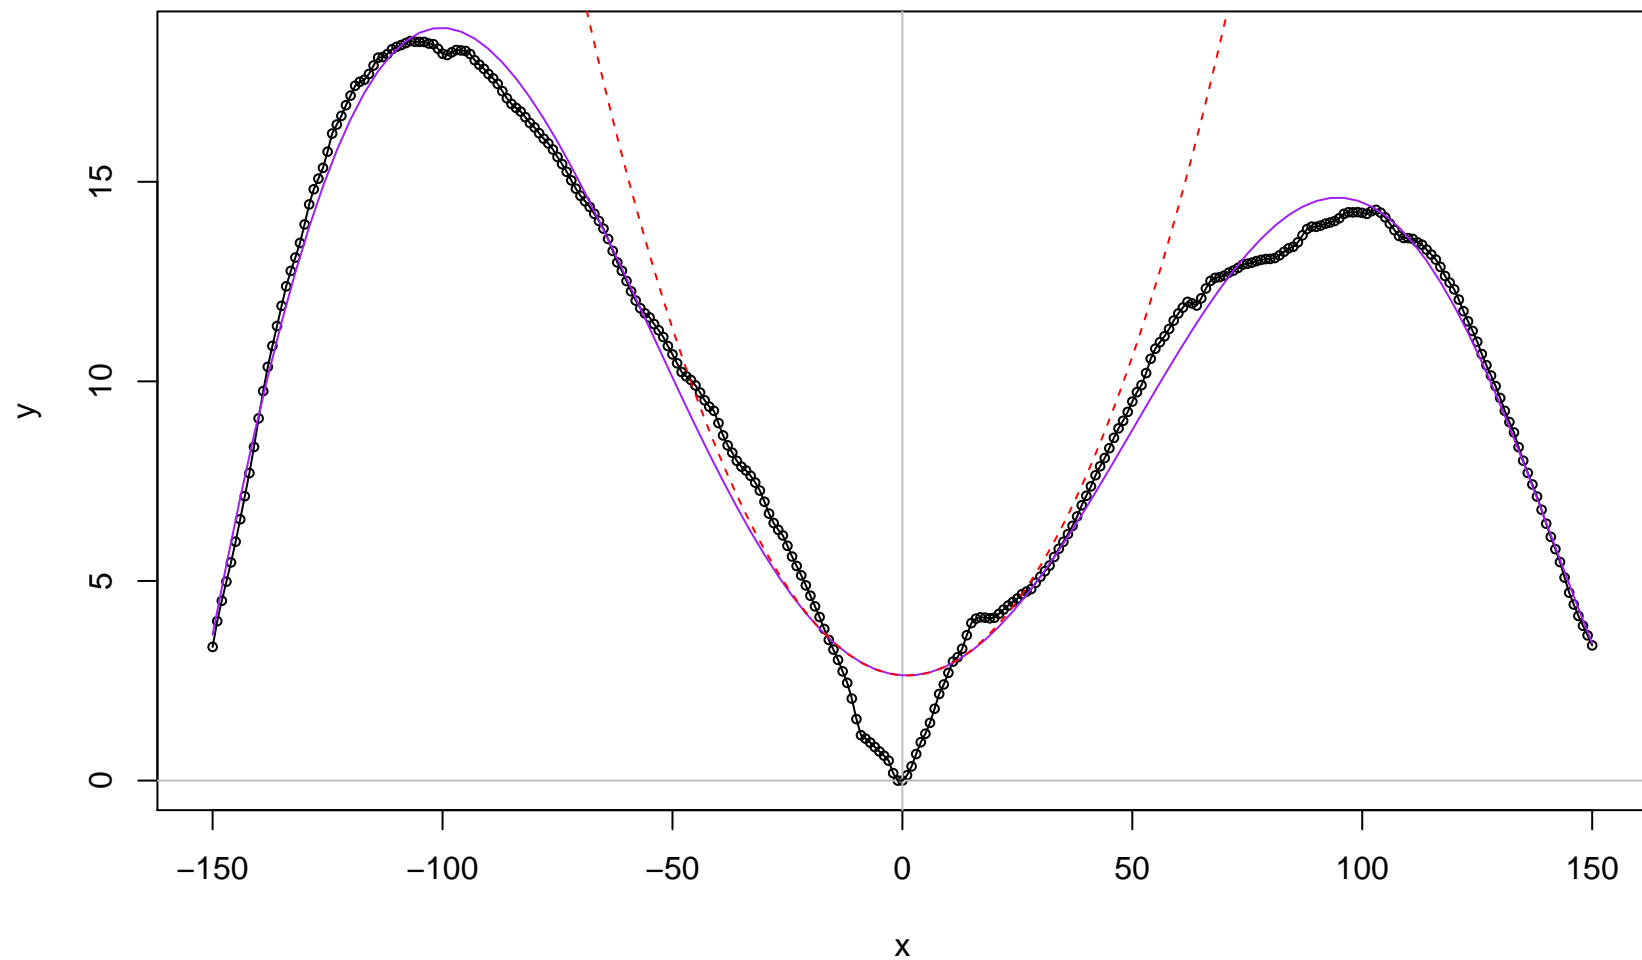

Site 43

$K*100= 0.7476$

$R^2= 0.8644$

radius= 133.7664

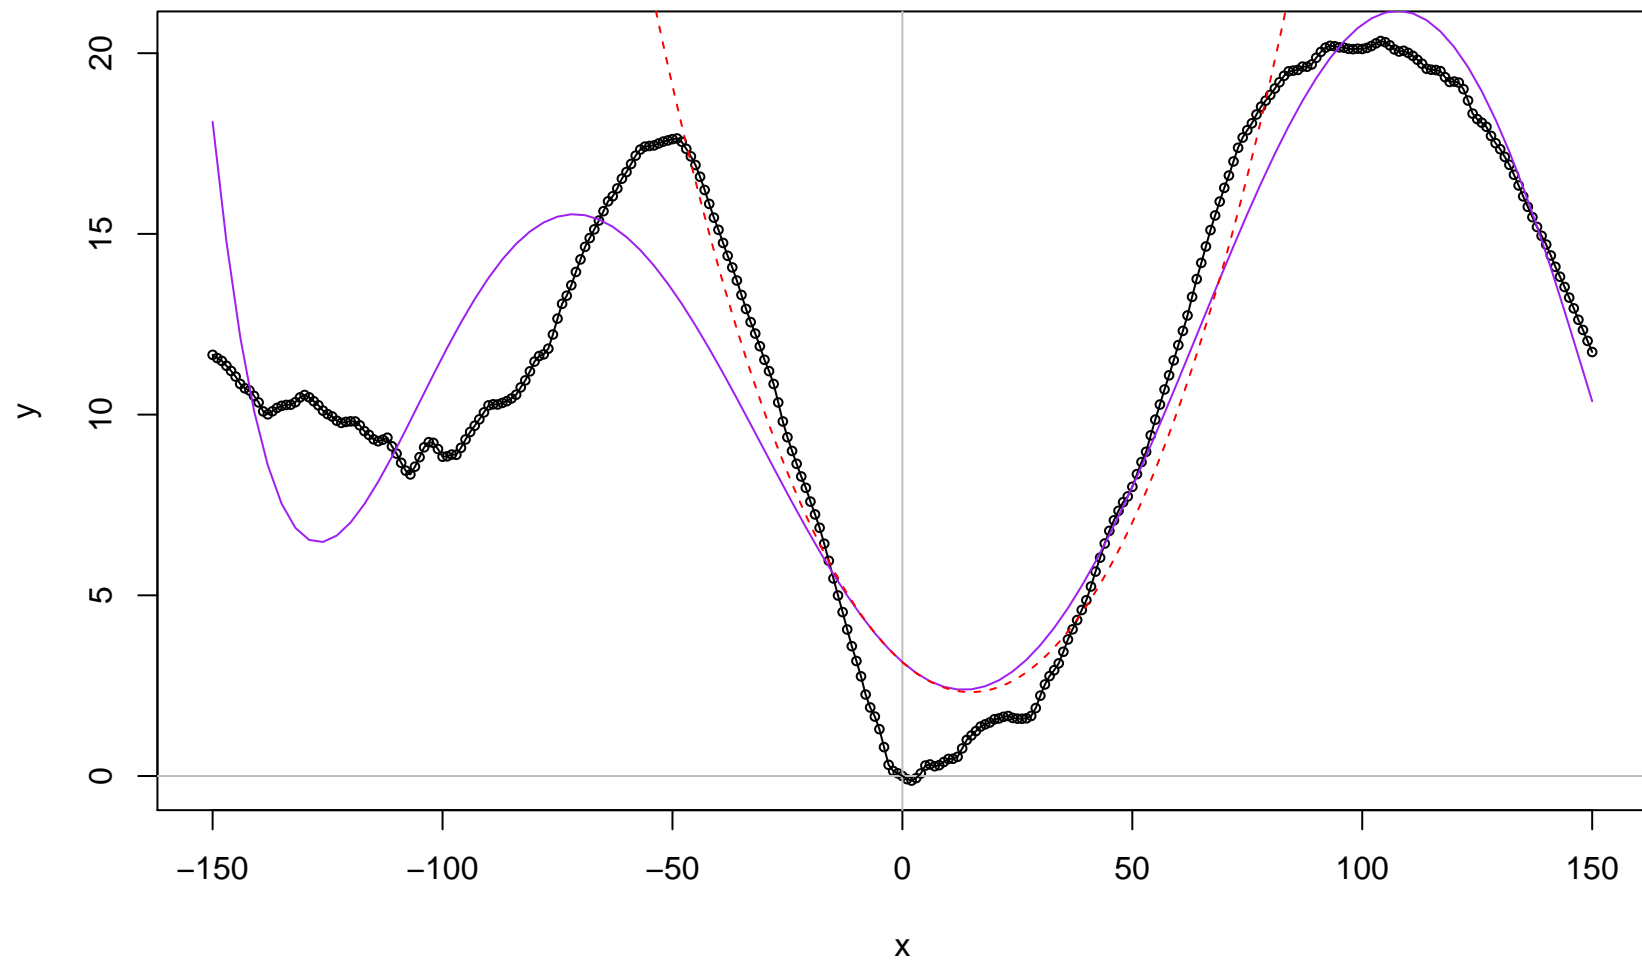

Site 44

$K*100= 0.4421$

$R^2= 0.8698$

radius= 226.1944

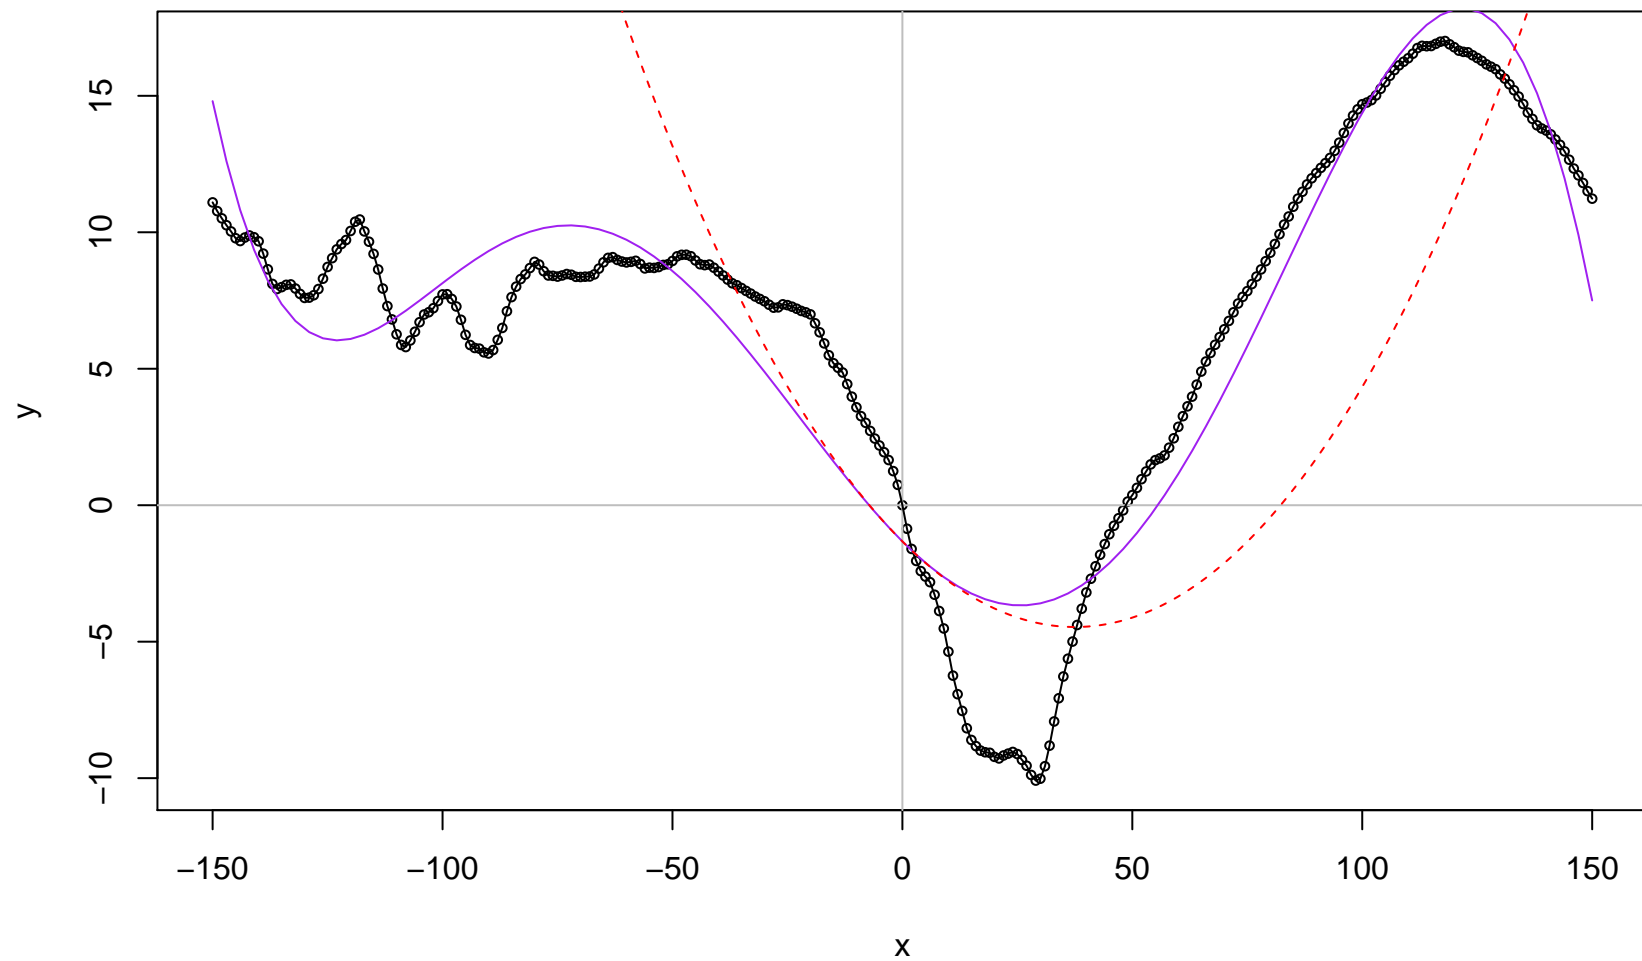

Site 45

$K \cdot 100 = 0.2823$

$R^2 = 0.9797$

radius= 354.2837

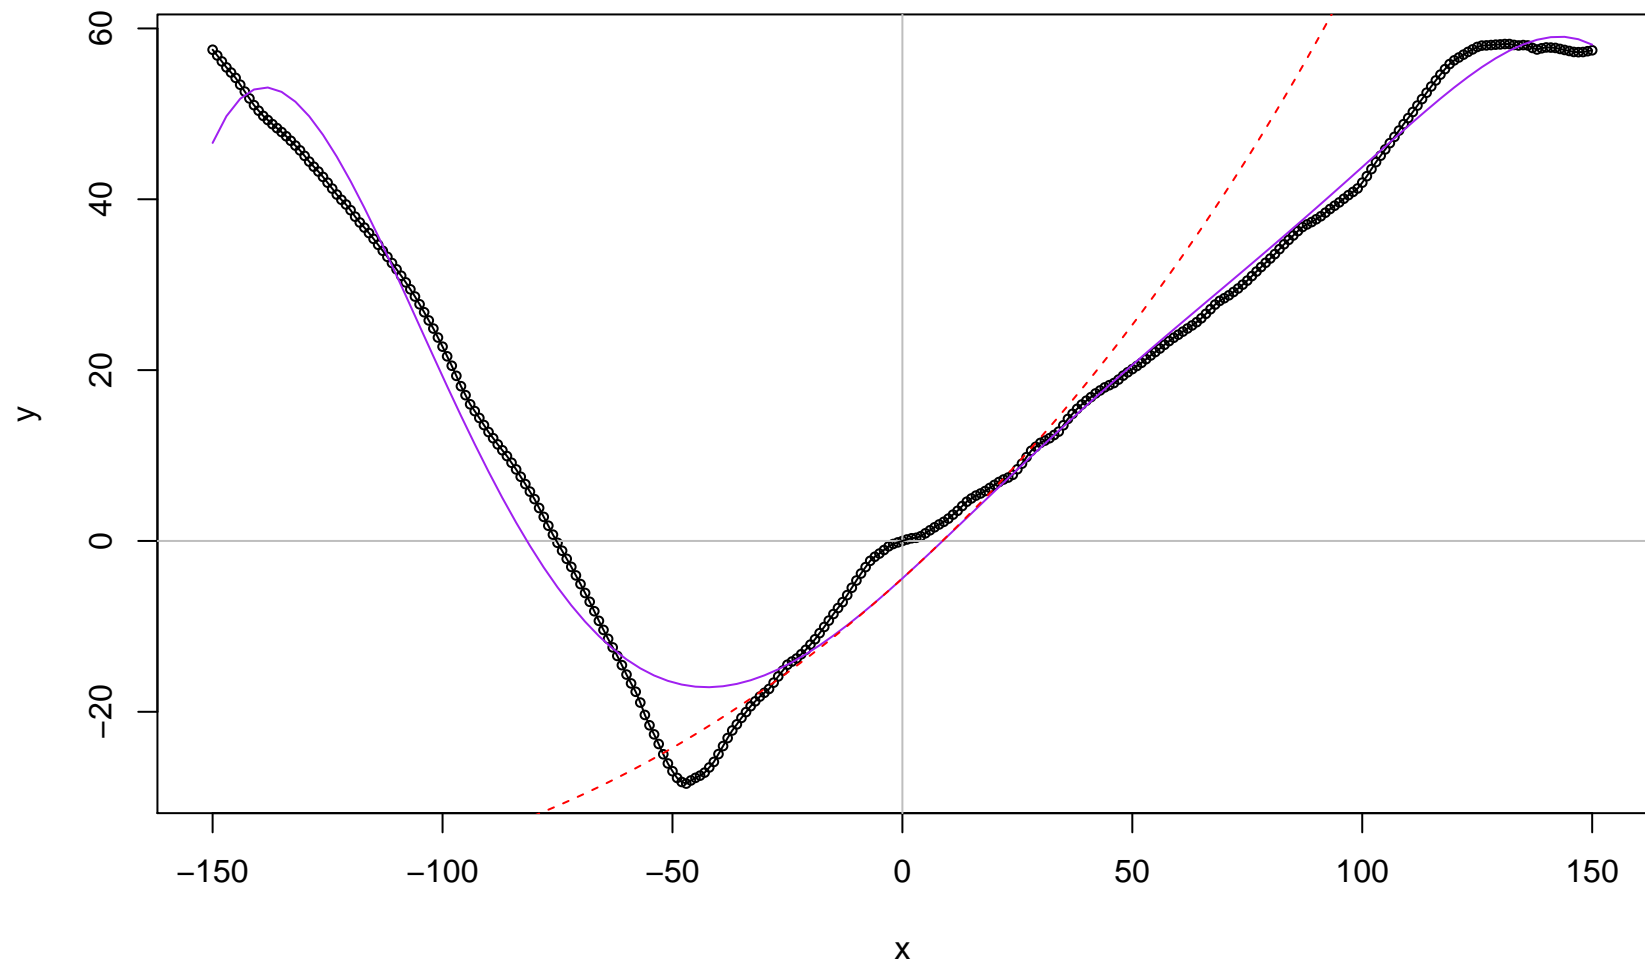

Site 46

$K \cdot 100 = 0.0797$

$R^2 = 0.9896$

radius= 1254.0535

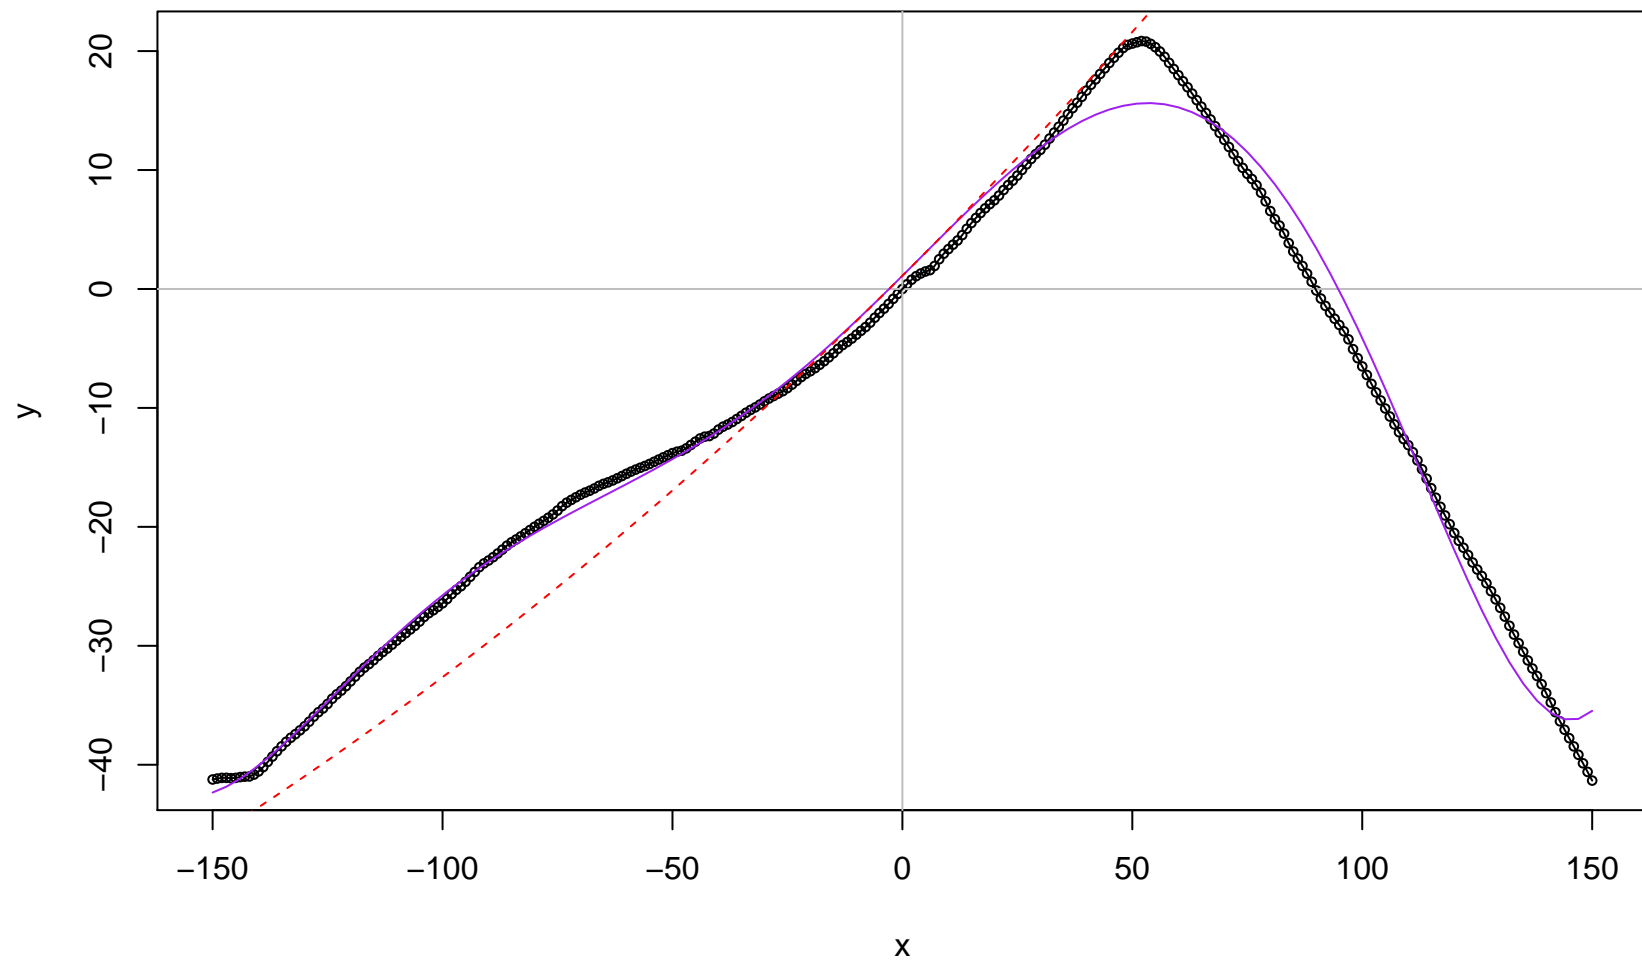

Site 47

$K*100= 0.2292$

$R^2= 0.9952$

radius= 436.3796

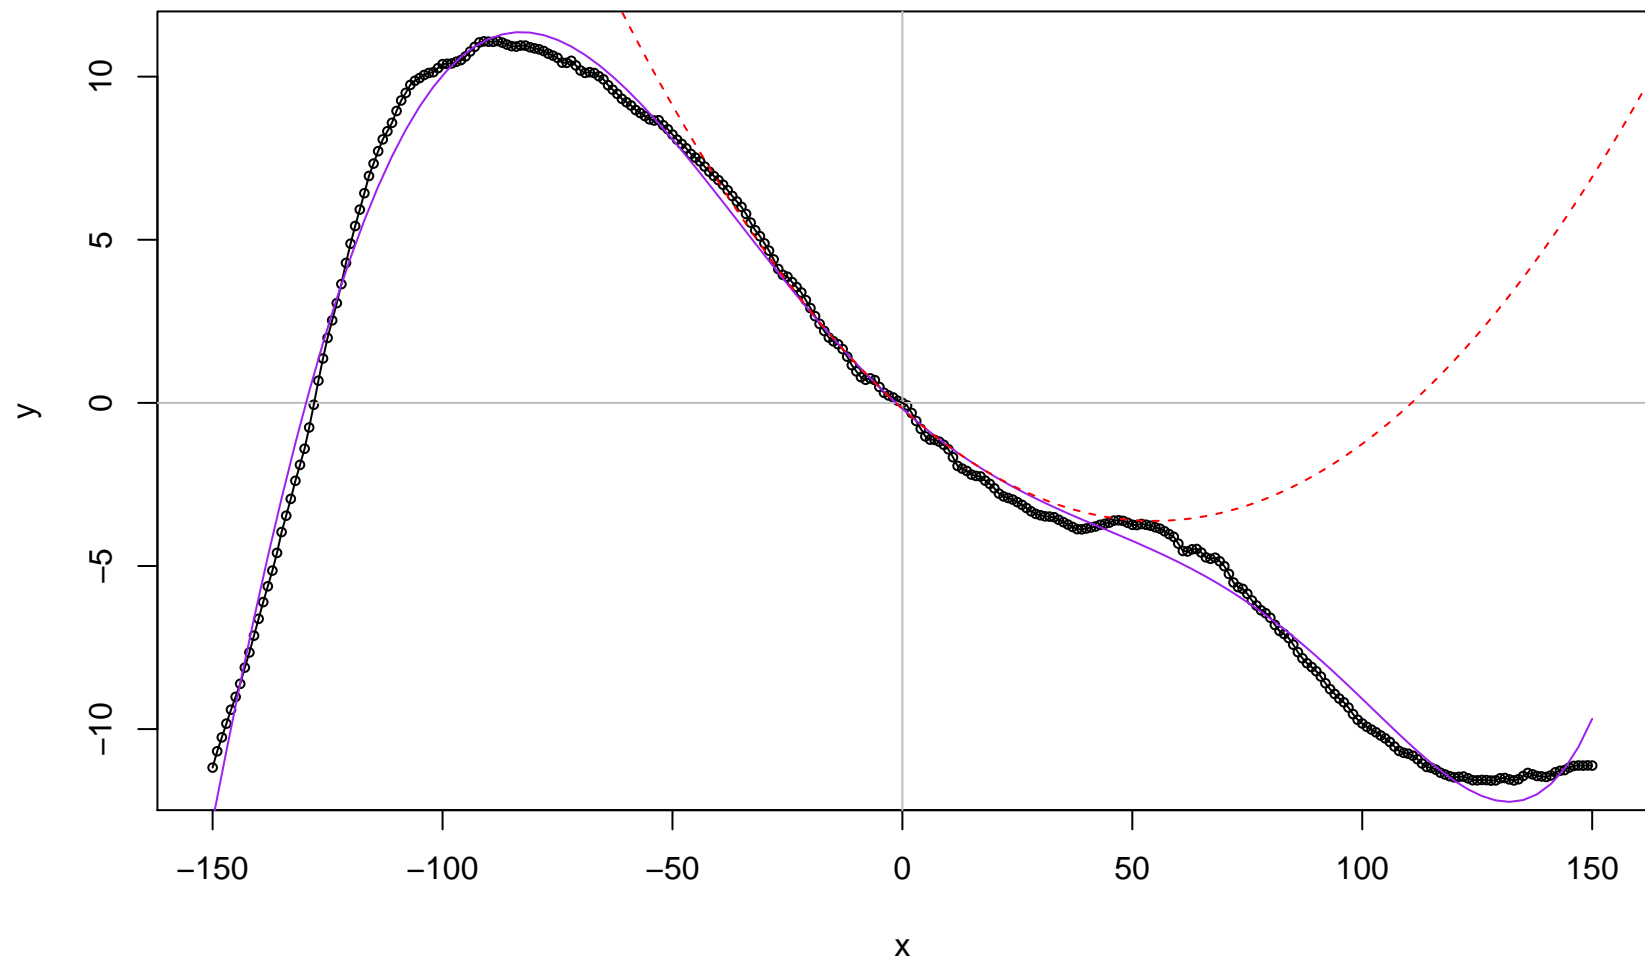

Site 48

$K*100 = -1.0811$

$R^2 = 0.9908$

radius =  $-92.4987$

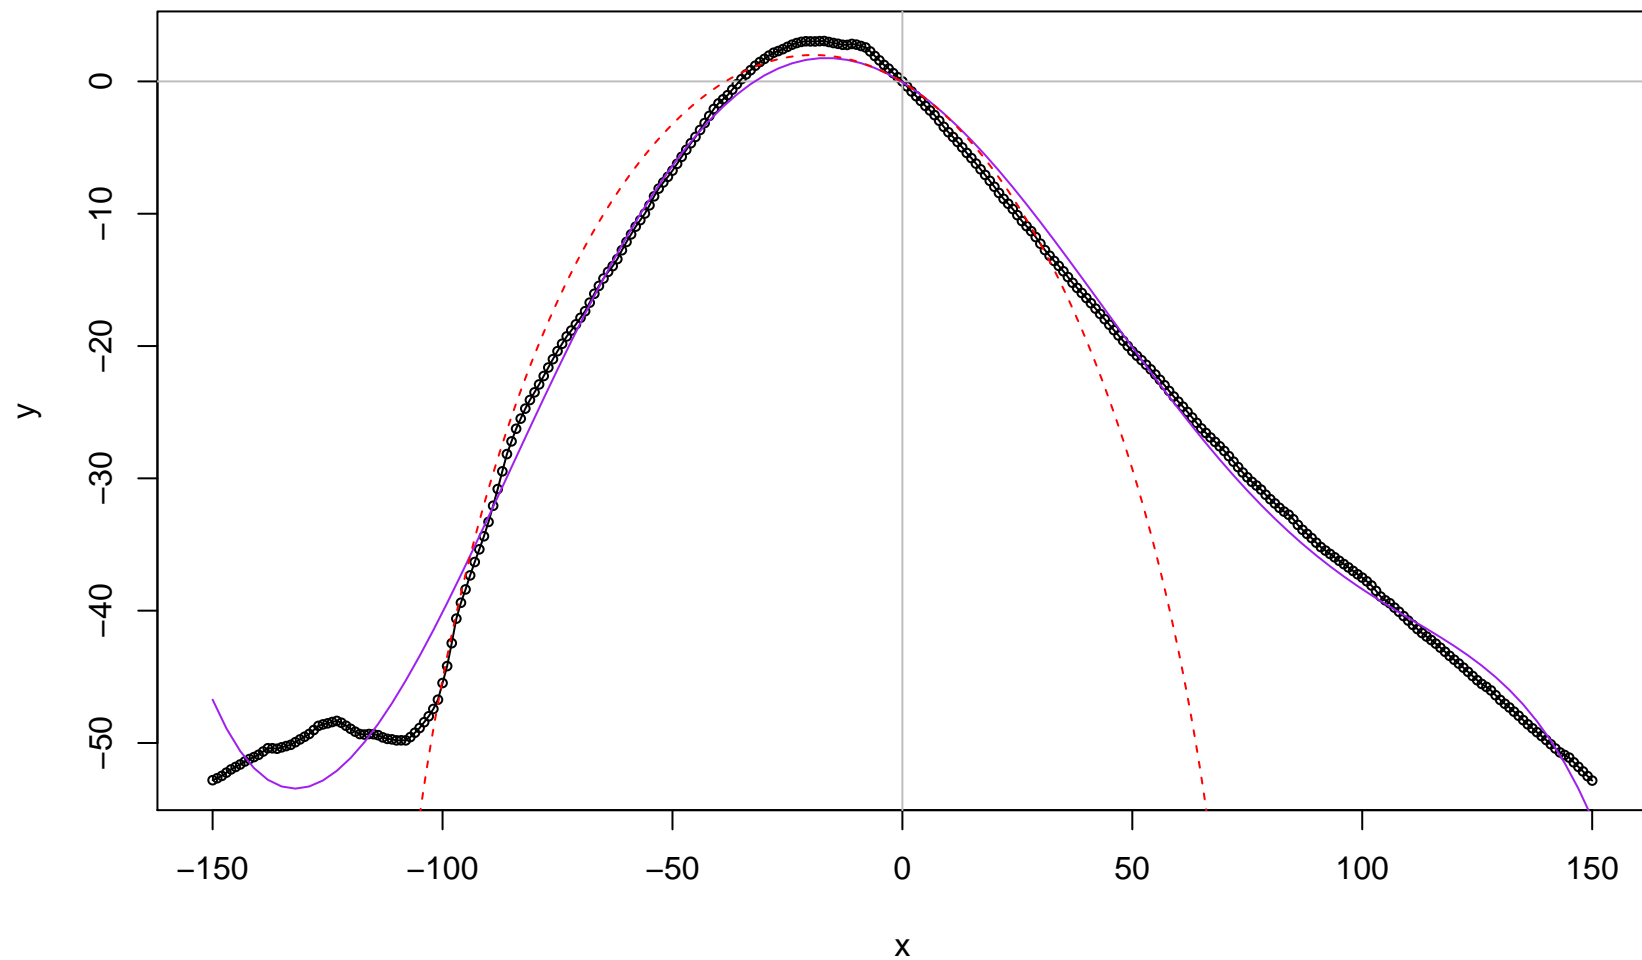



Site 49

$K*100 = -0.9072$

$R^2 = 0.9906$

radius = -110.2283

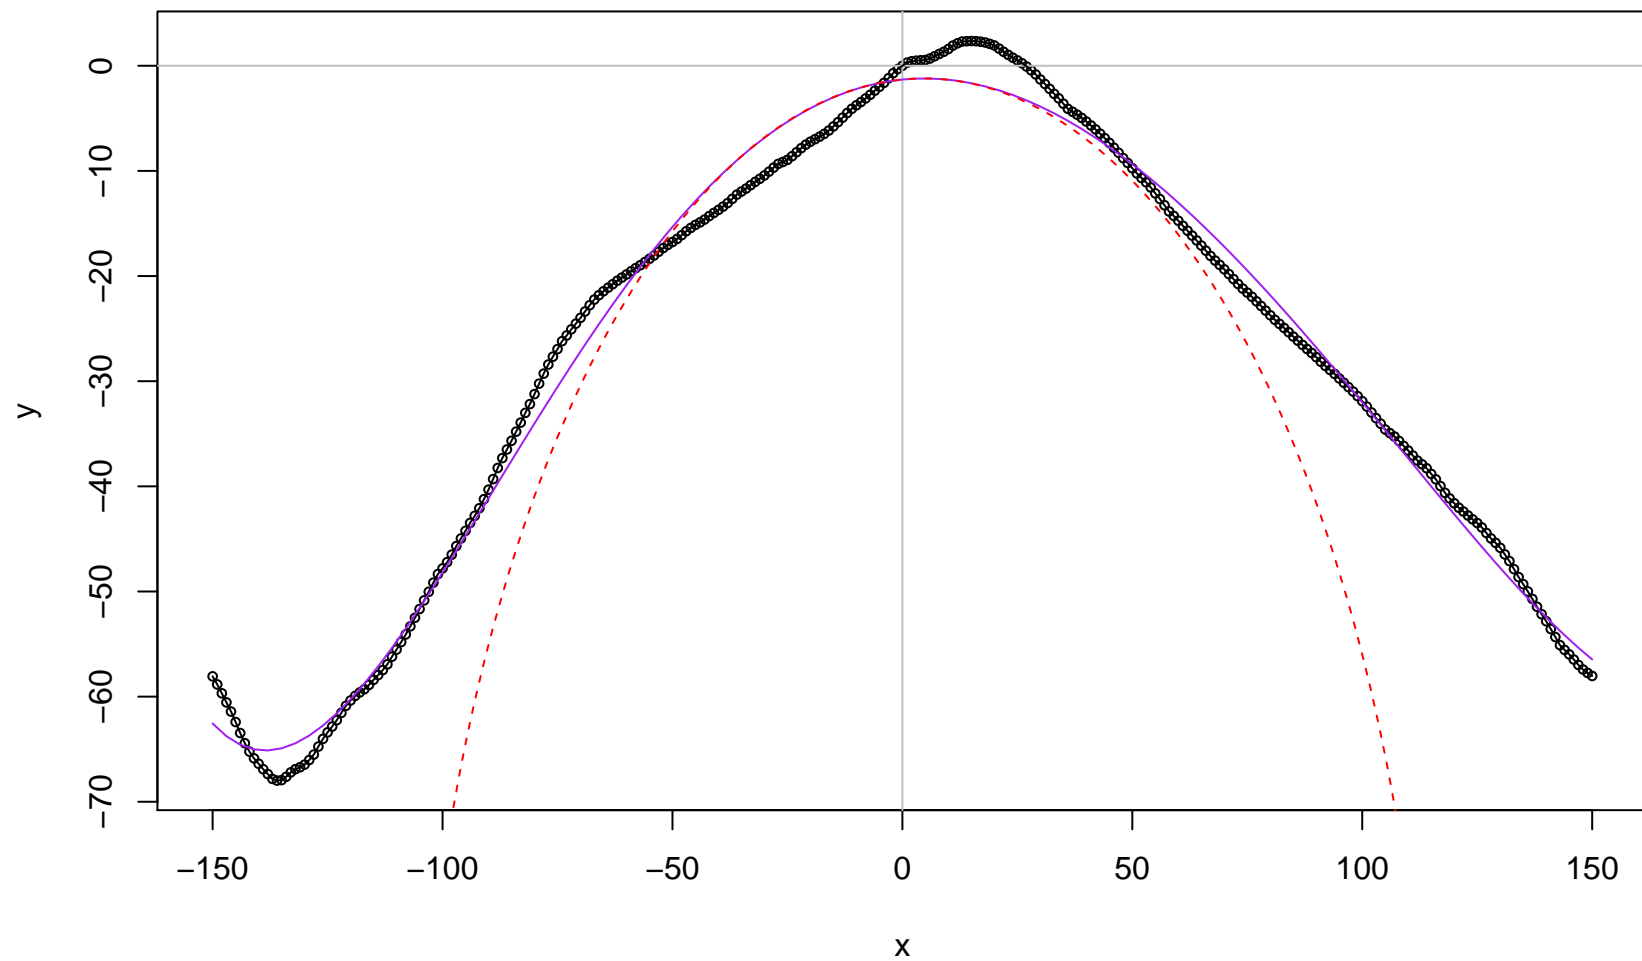

Site 50

$K*100 = -0.9456$

$R^2 = 0.9901$

radius = -105.7585

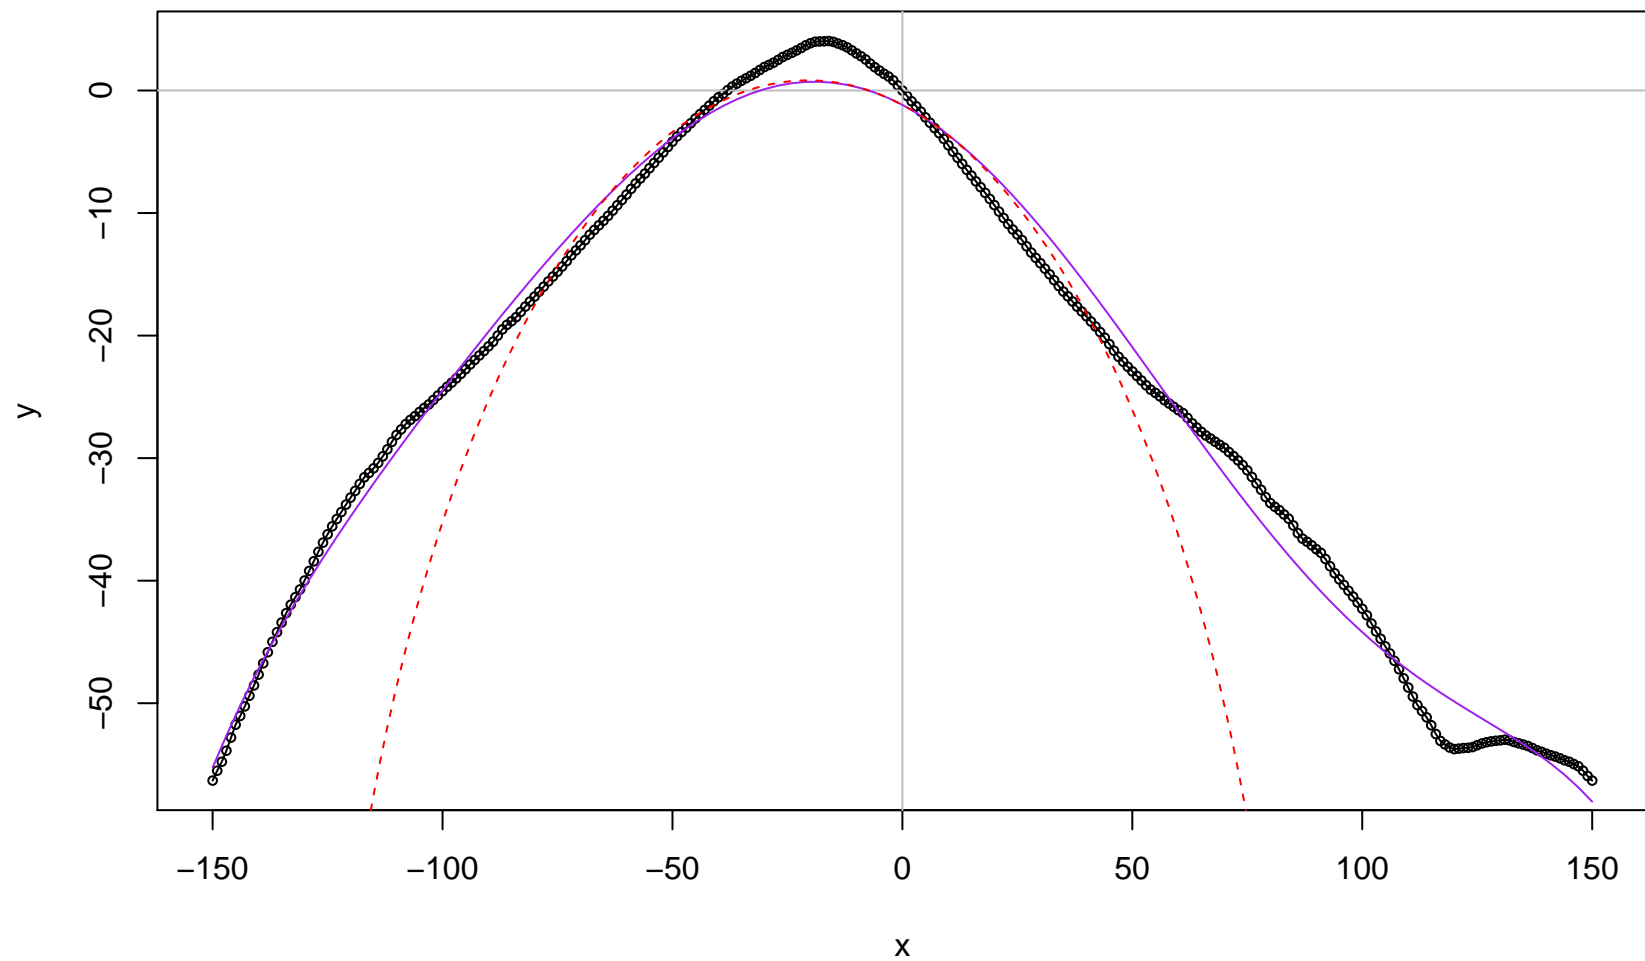

Site 51

$K*100= 2.0575$

$R^2= 0.991$

radius= 48.6034

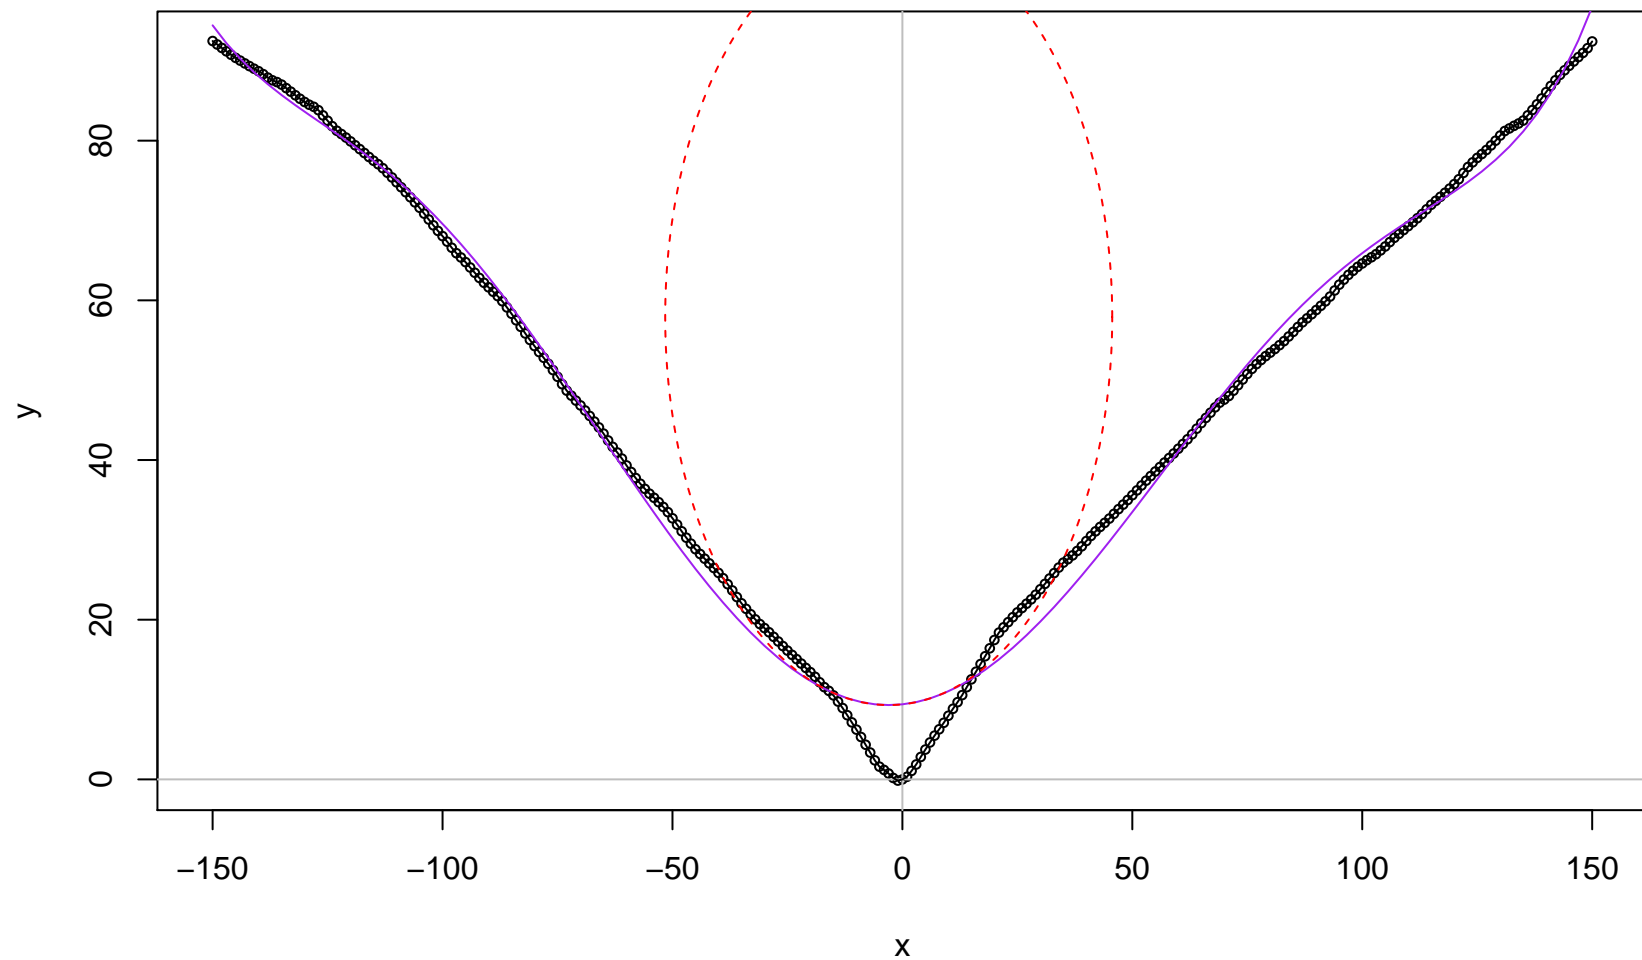

Site 52

$K*100= 1.9619$

$R^2= 0.9921$

radius= 50.9721

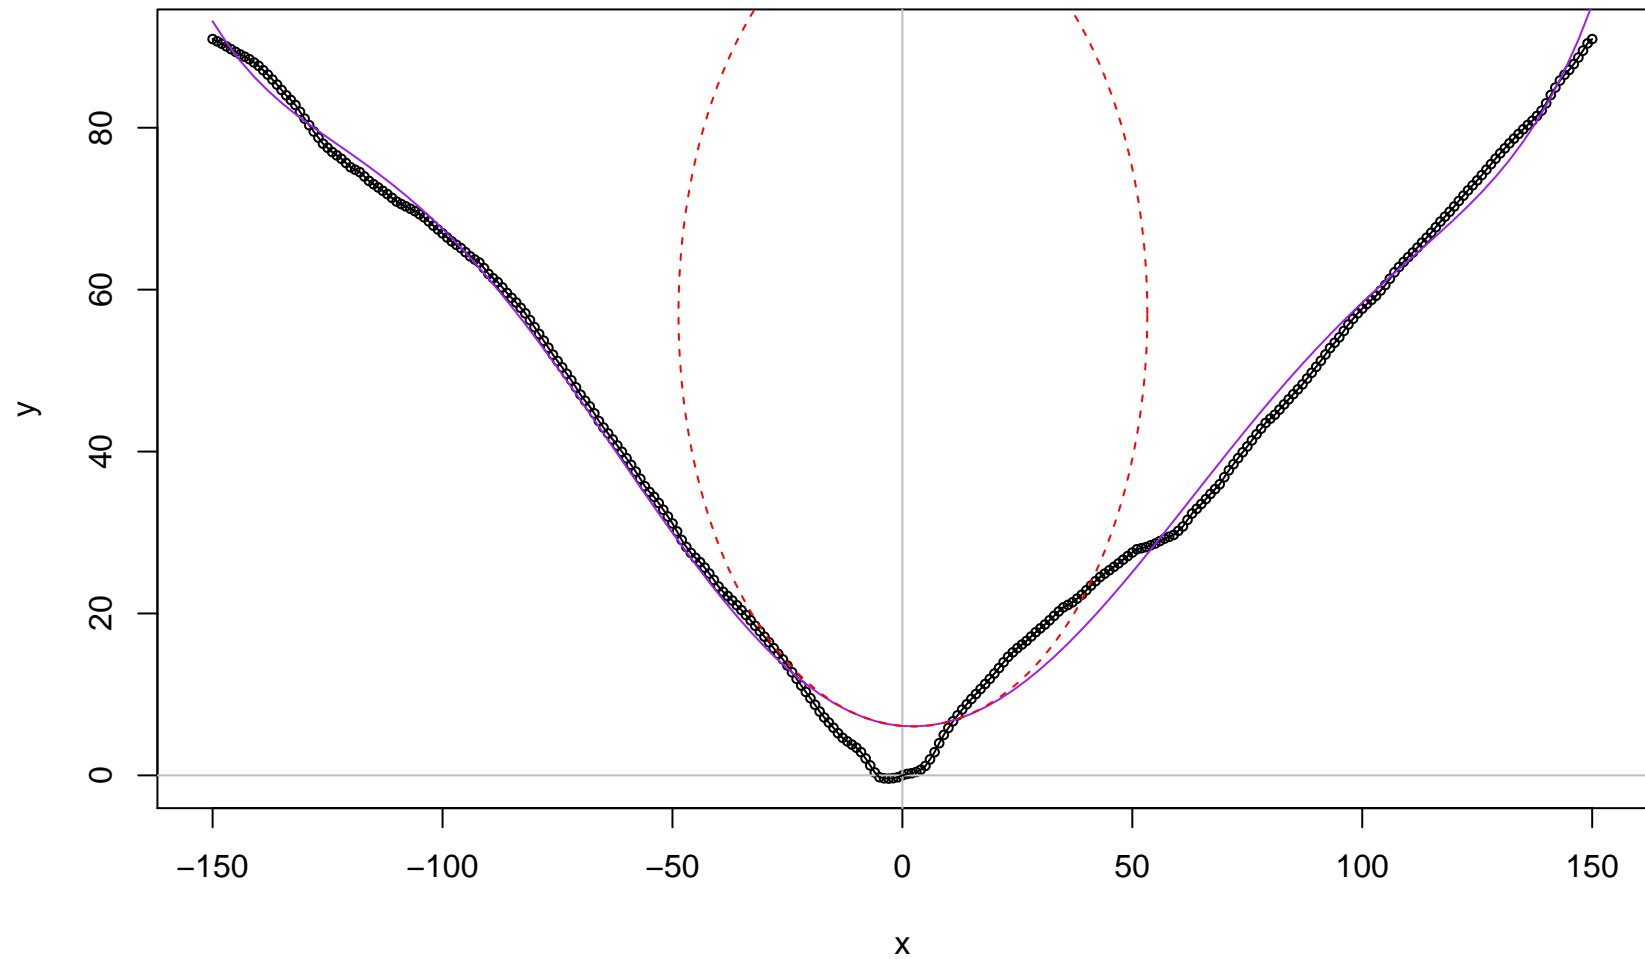

Site 53

$K \cdot 100 = 1.5812$

$R^2 = 0.9875$

radius= 63.2438

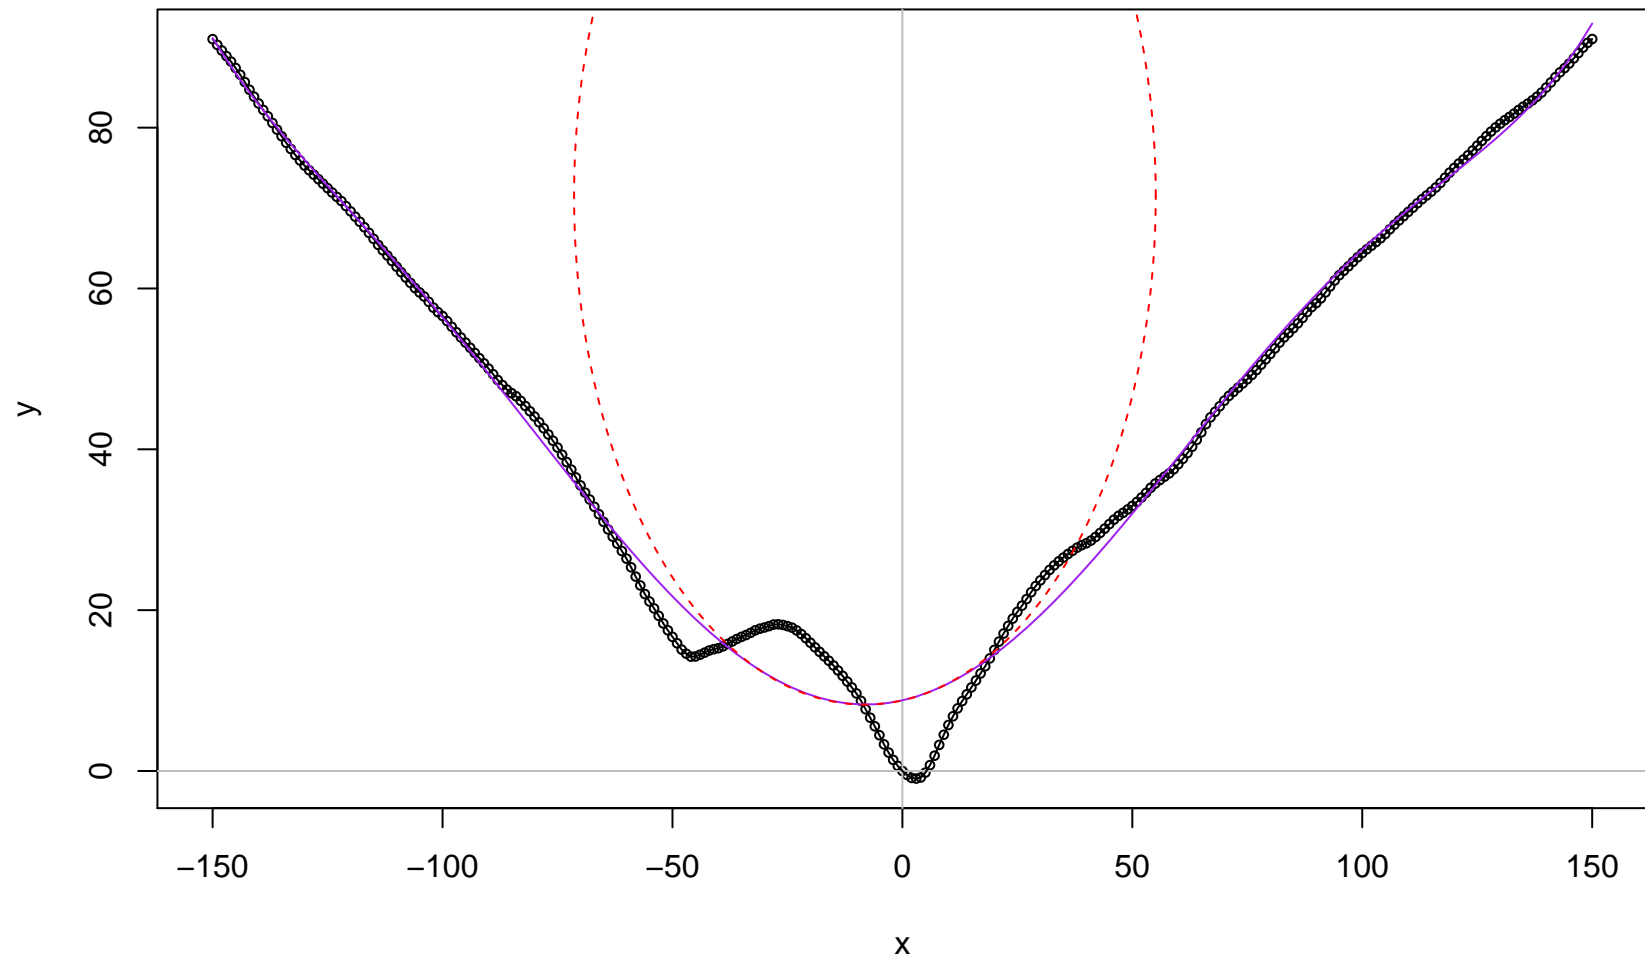

Site 54

$K \cdot 100 = 0.8876$

$R^2 = 0.9474$

radius = 112.6634

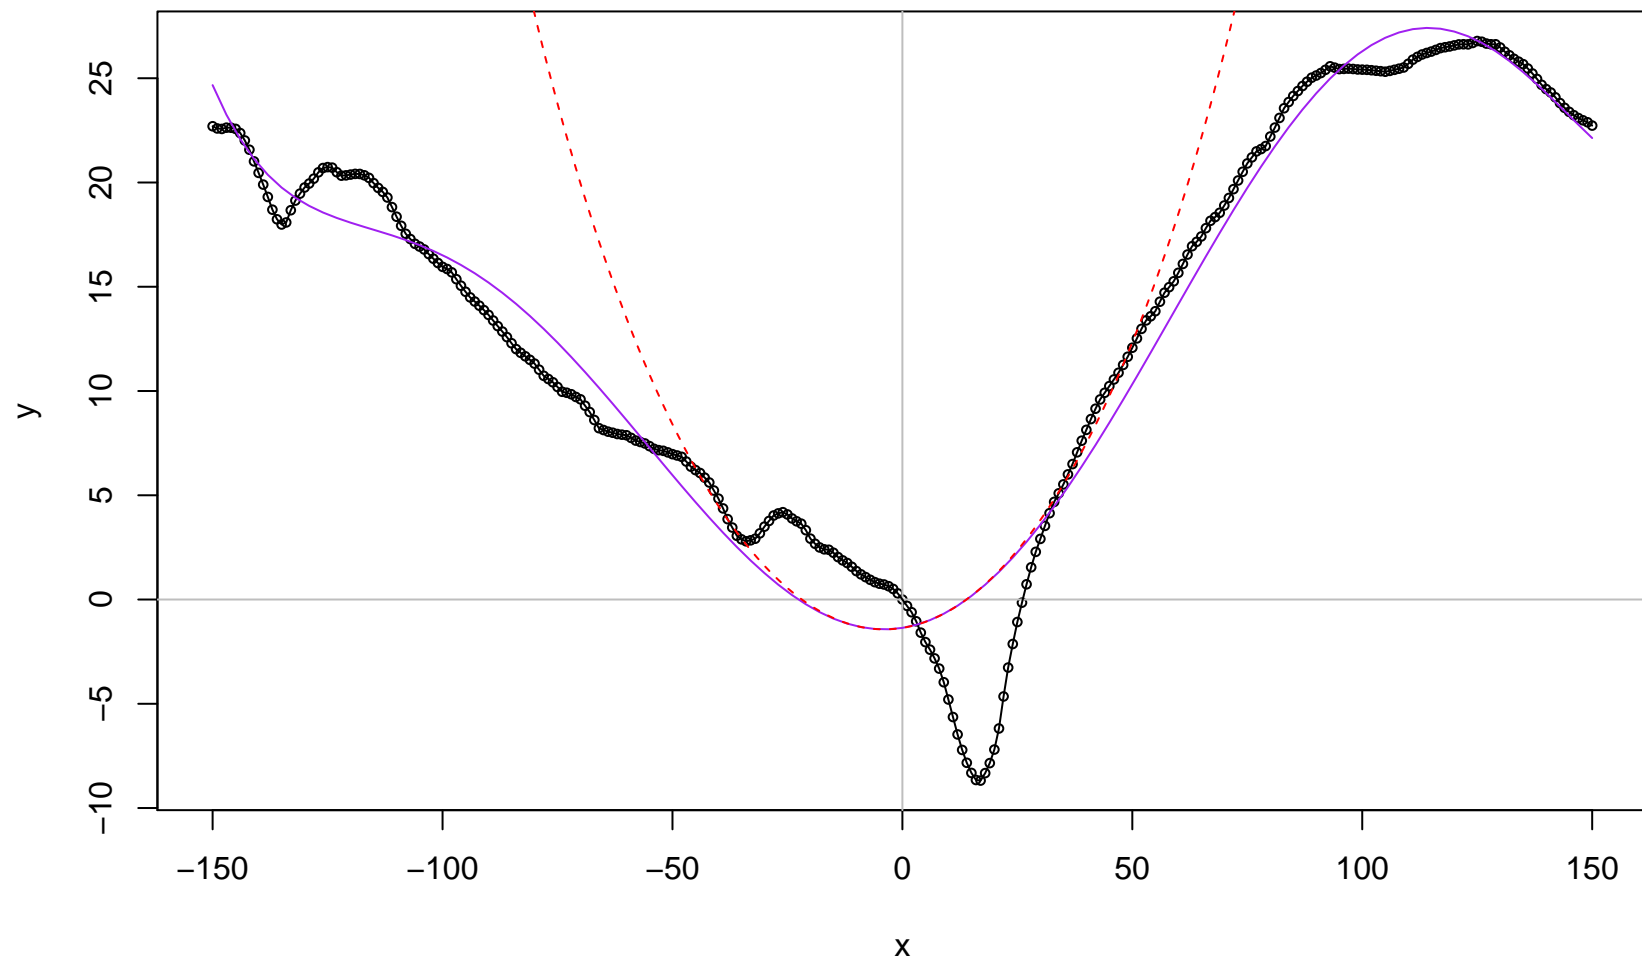

Site 55

$K*100 = -0.1816$

$R^2 = 0.9665$

radius =  $-550.6597$

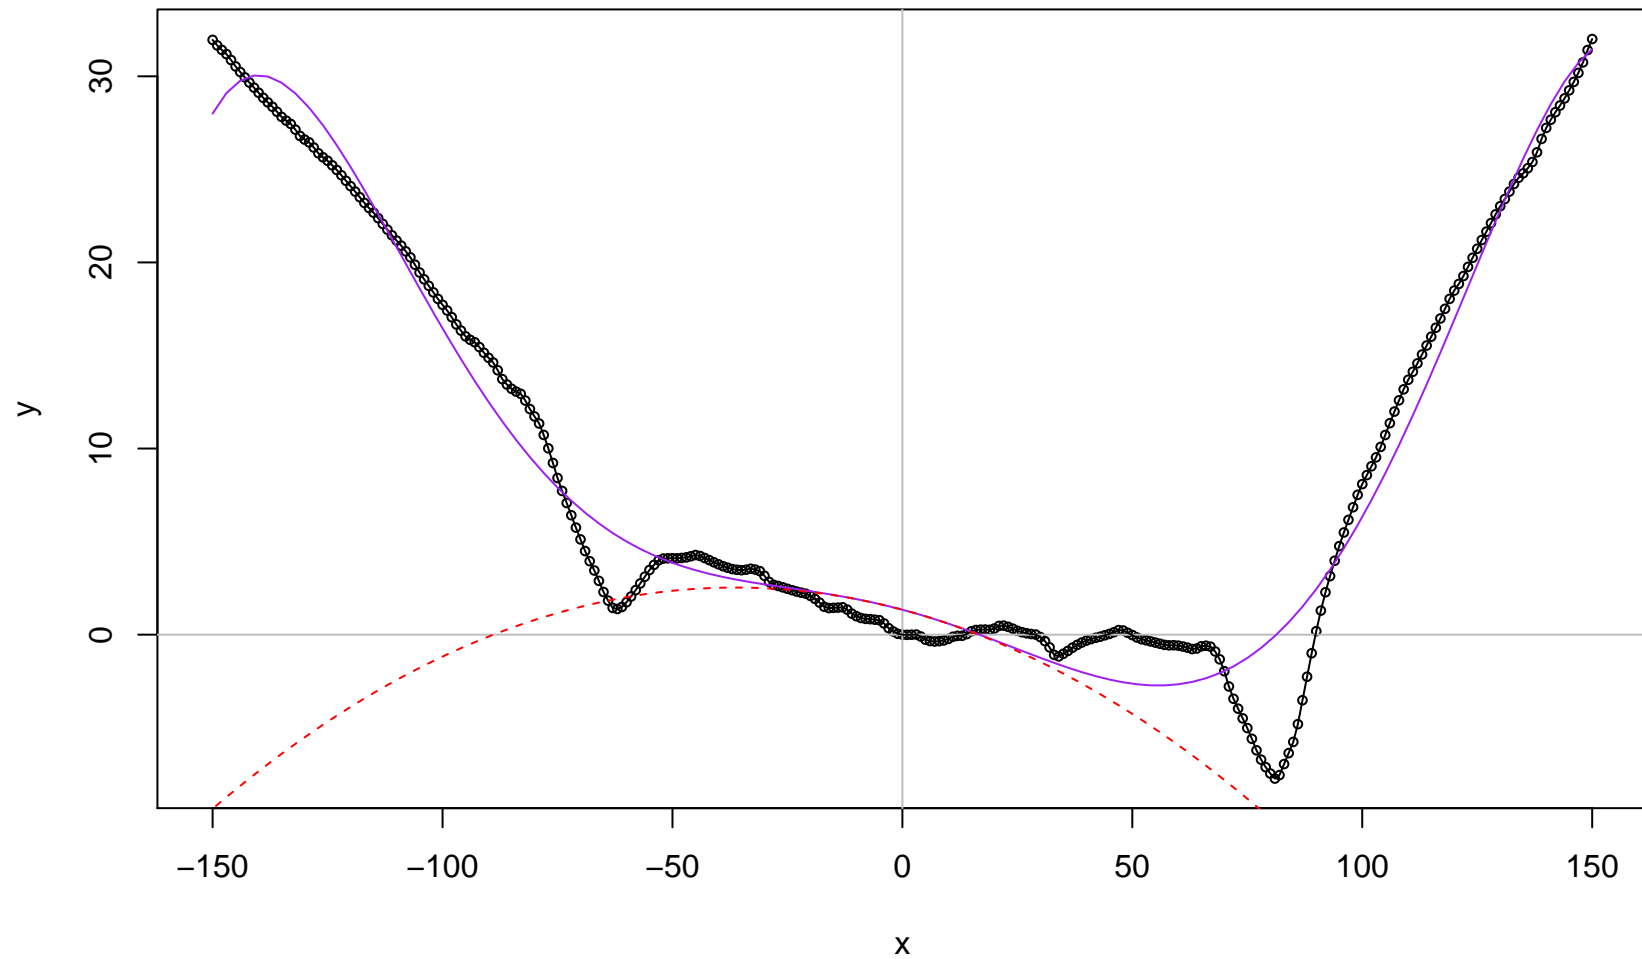

Site 56

$K \cdot 100 = 1.2788$

$R^2 = 0.9771$

radius = 78.1997

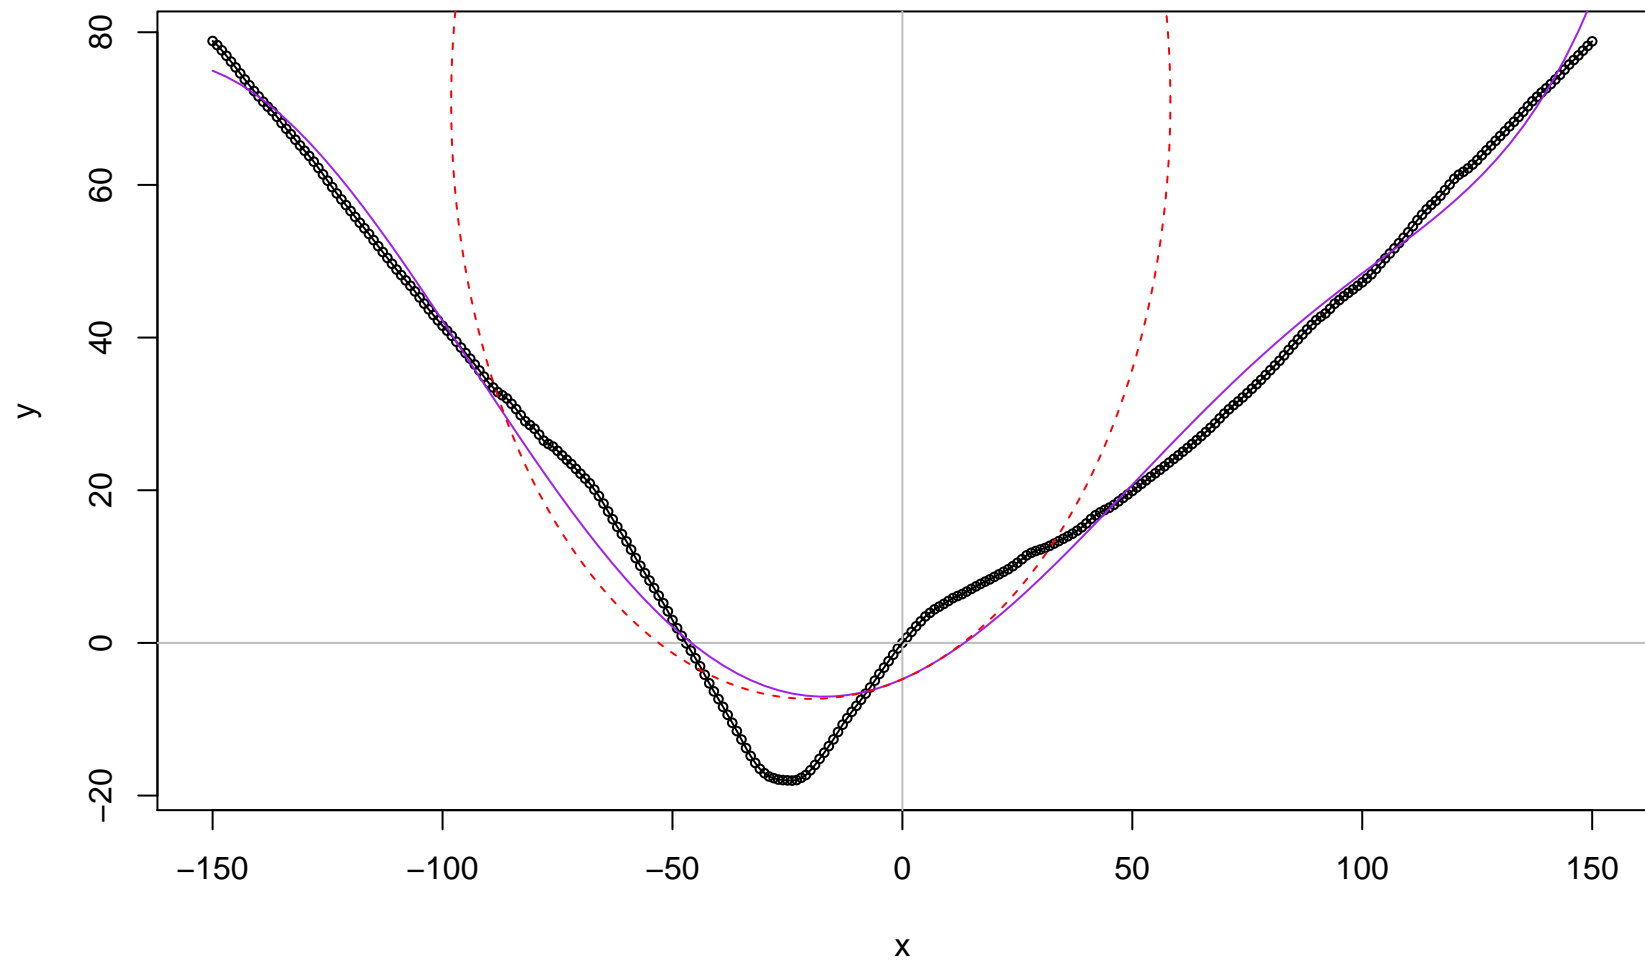



Site 57

$K \cdot 100 = -0.2465$

$R^2 = 0.9435$

radius =  $-405.7095$

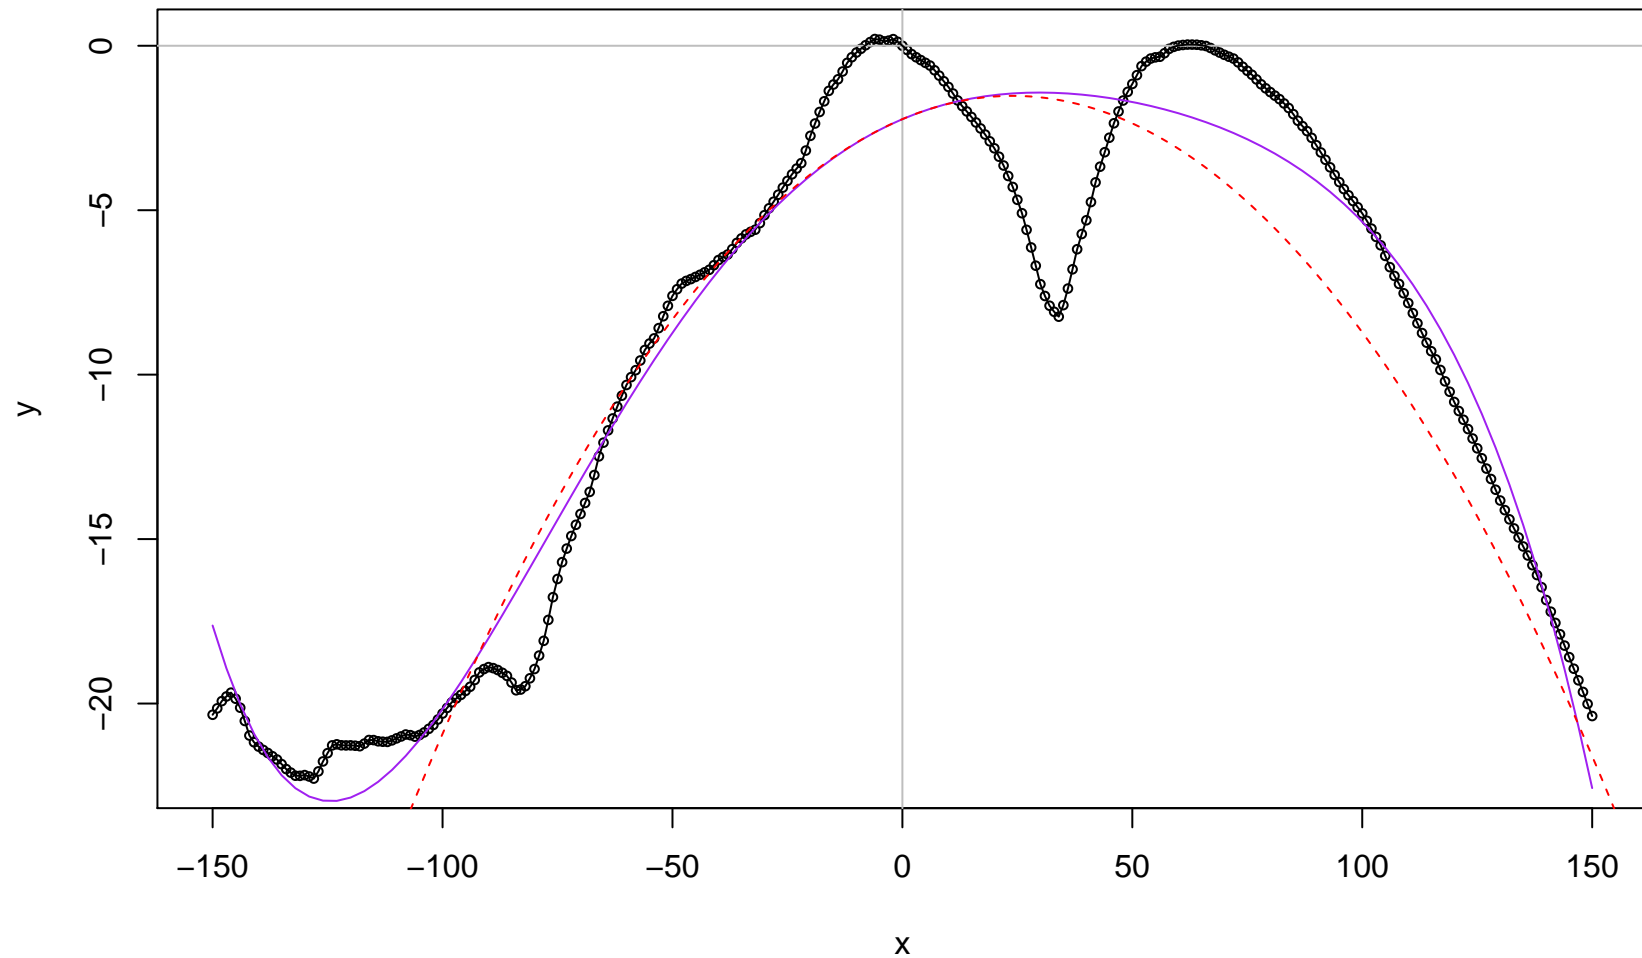

Site 58

$K*100 = -0.2391$

$R^2 = 0.9955$

radius = -418.2906

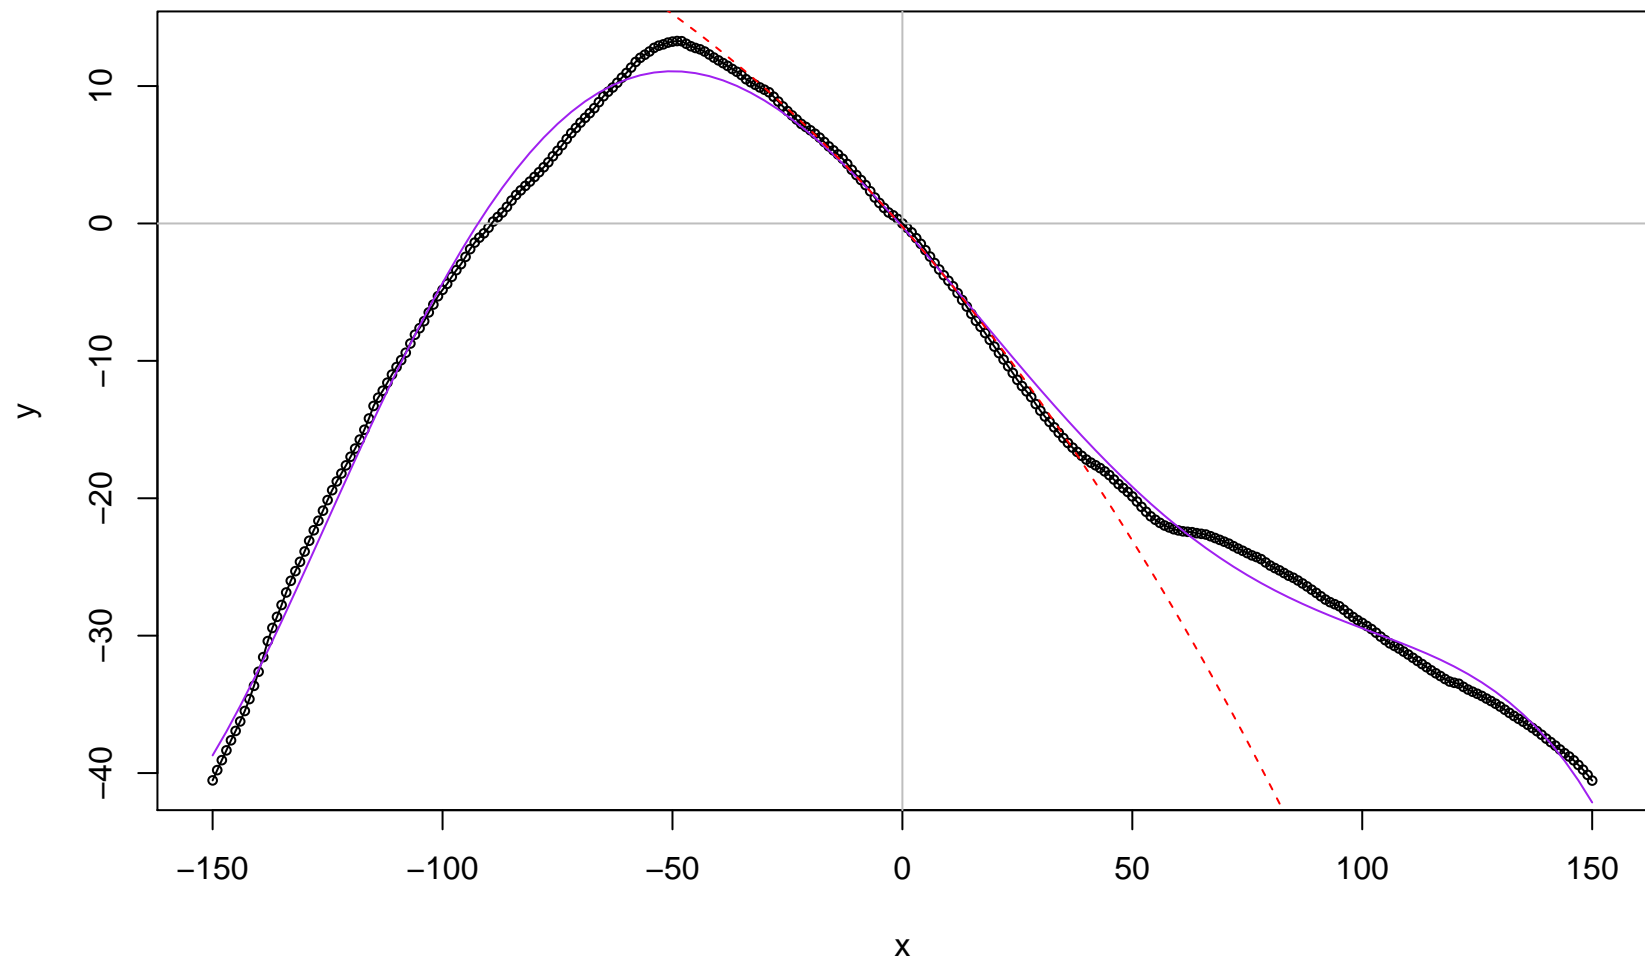

Site 59

$K \cdot 100 = 1.6289$

$R^2 = 0.9742$

radius = 61.3898

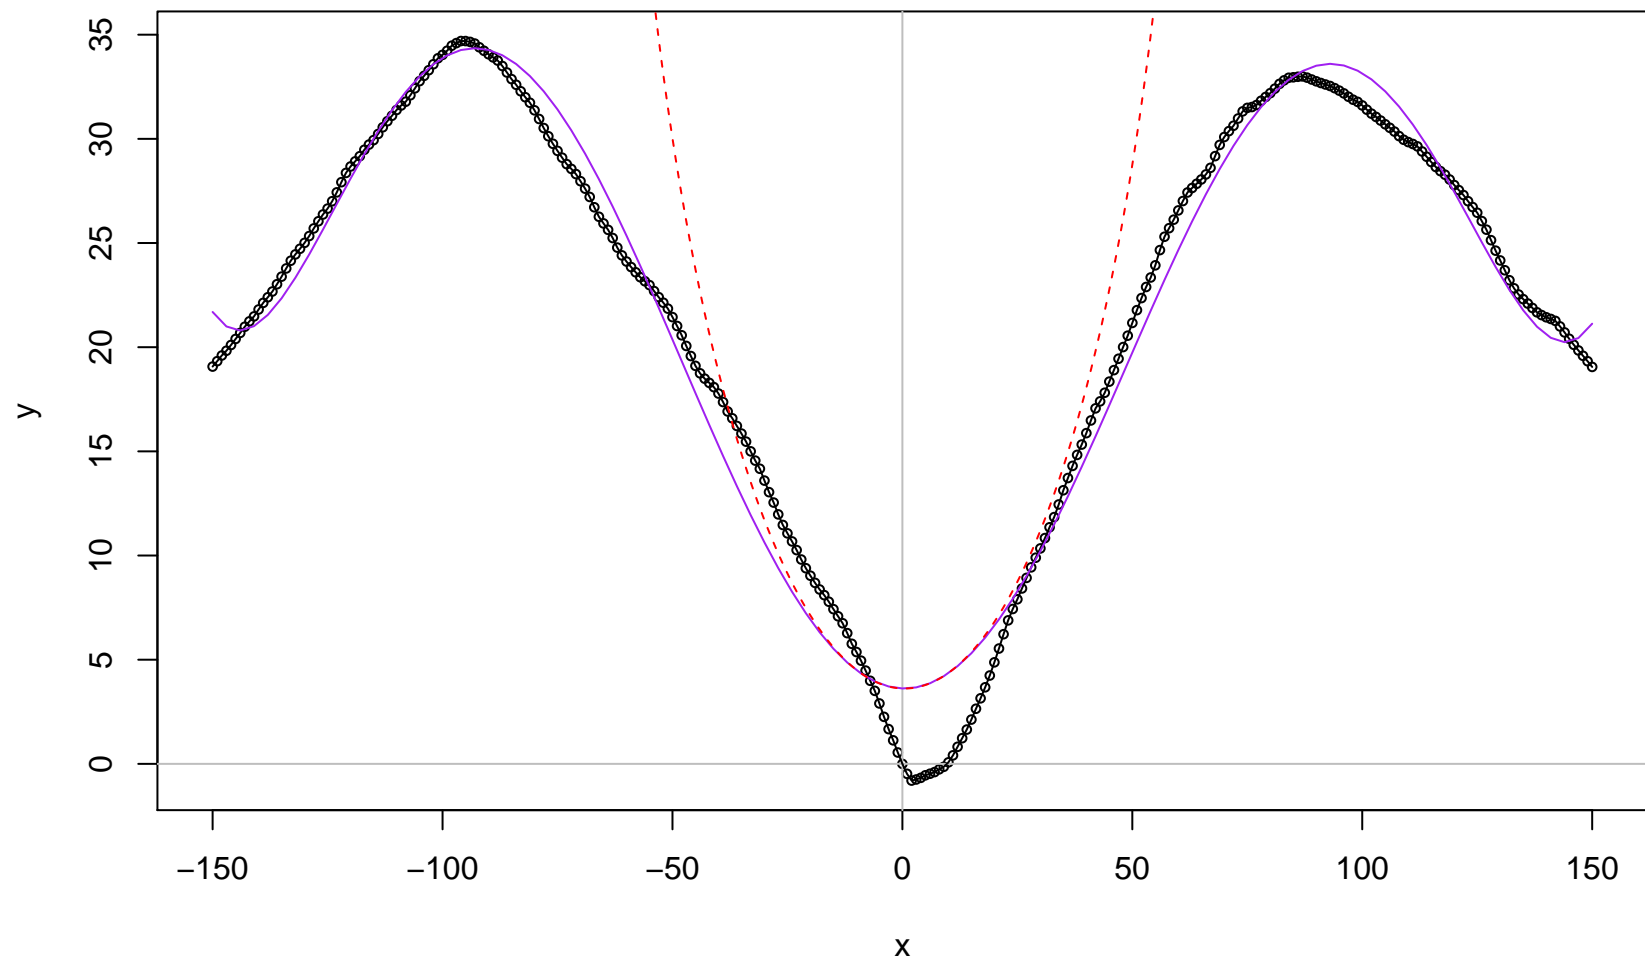

Site 60

$K*100= 1.2906$

$R^2= 0.9936$

radius= 77.4851

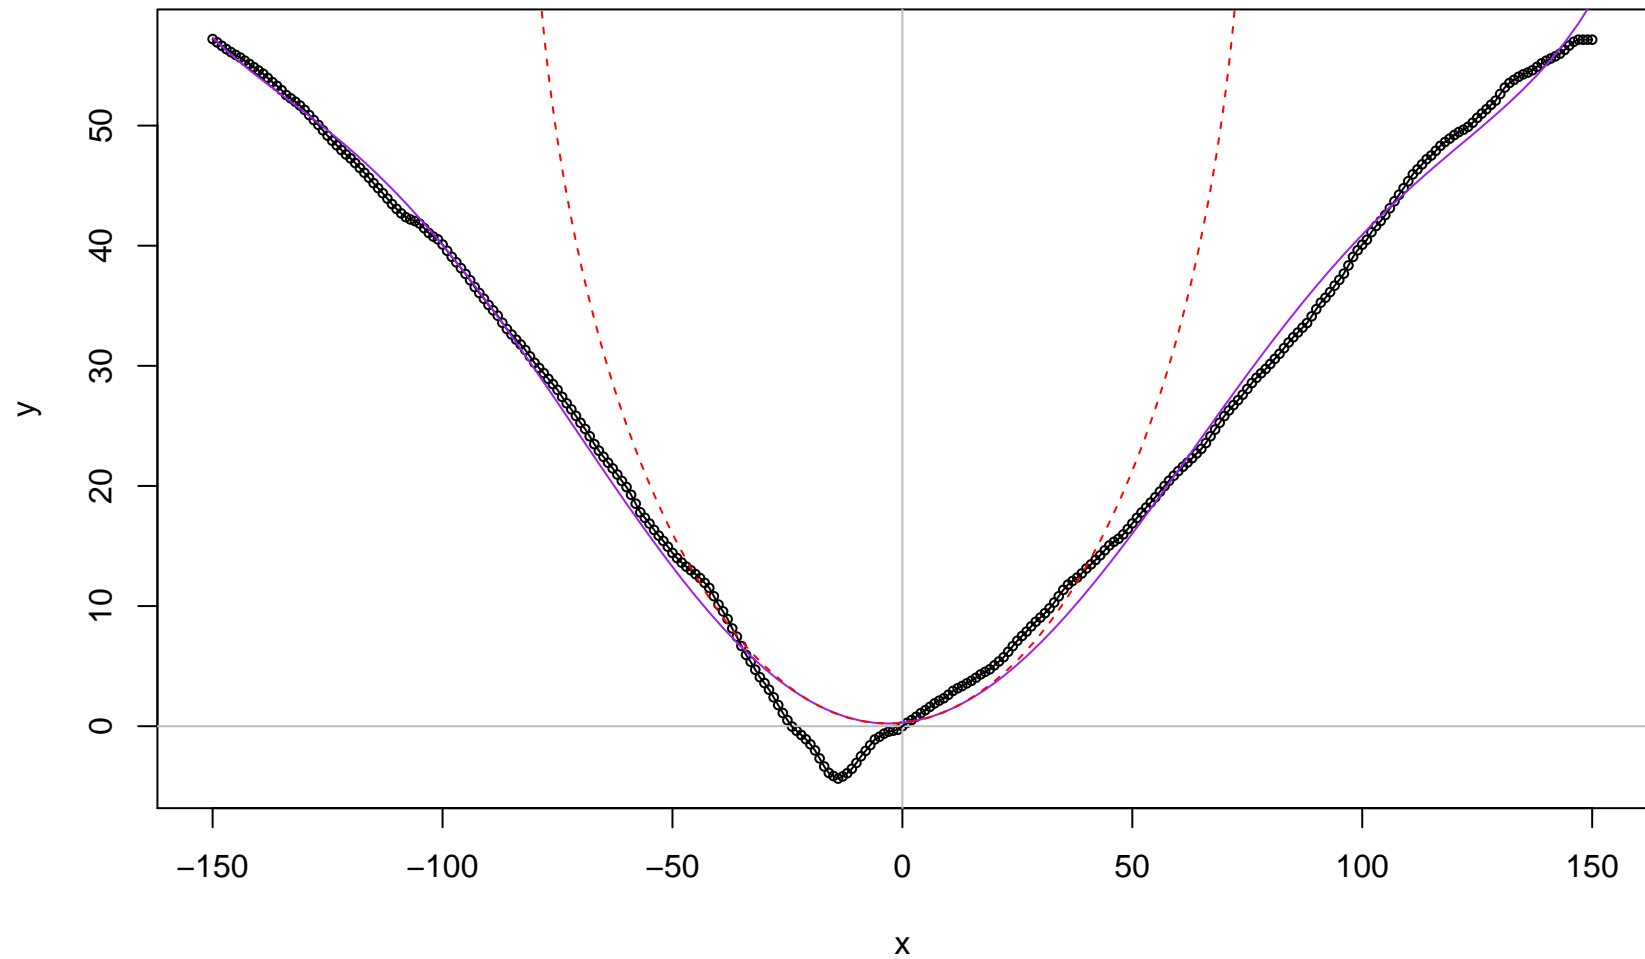

Site 61

$K*100 = -0.6723$

$R^2 = 0.9906$

radius =  $-148.7324$

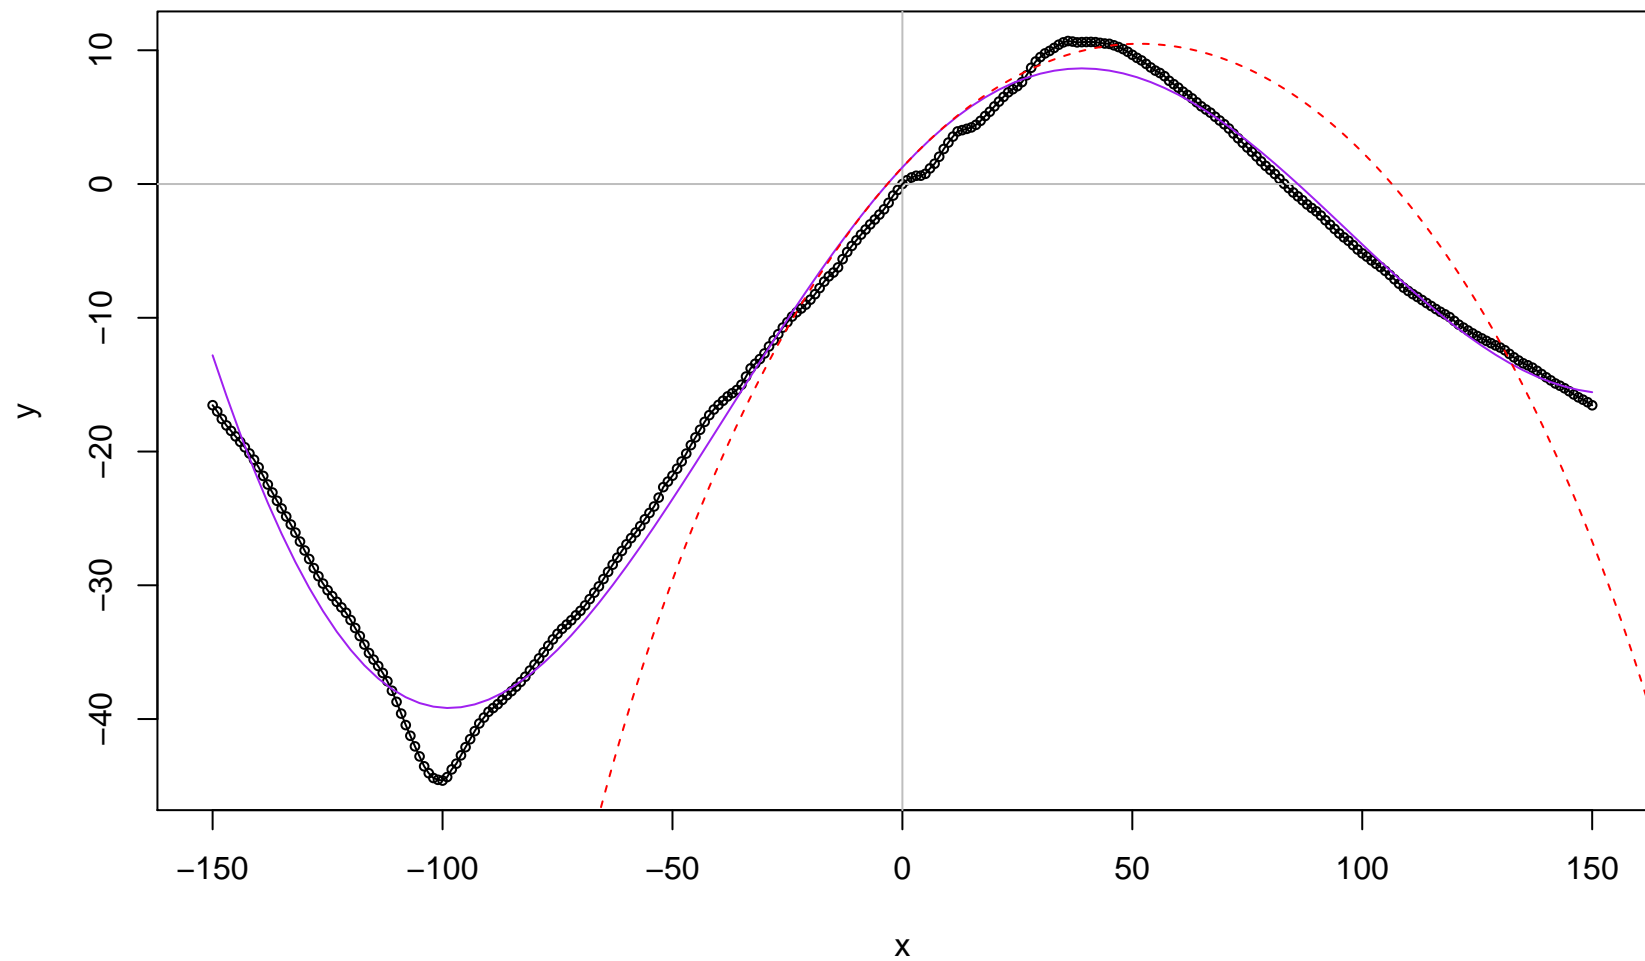

Site 62

$K^*100 = -0.7878$

$R^2 = 0.9854$

radius =  $-126.9432$

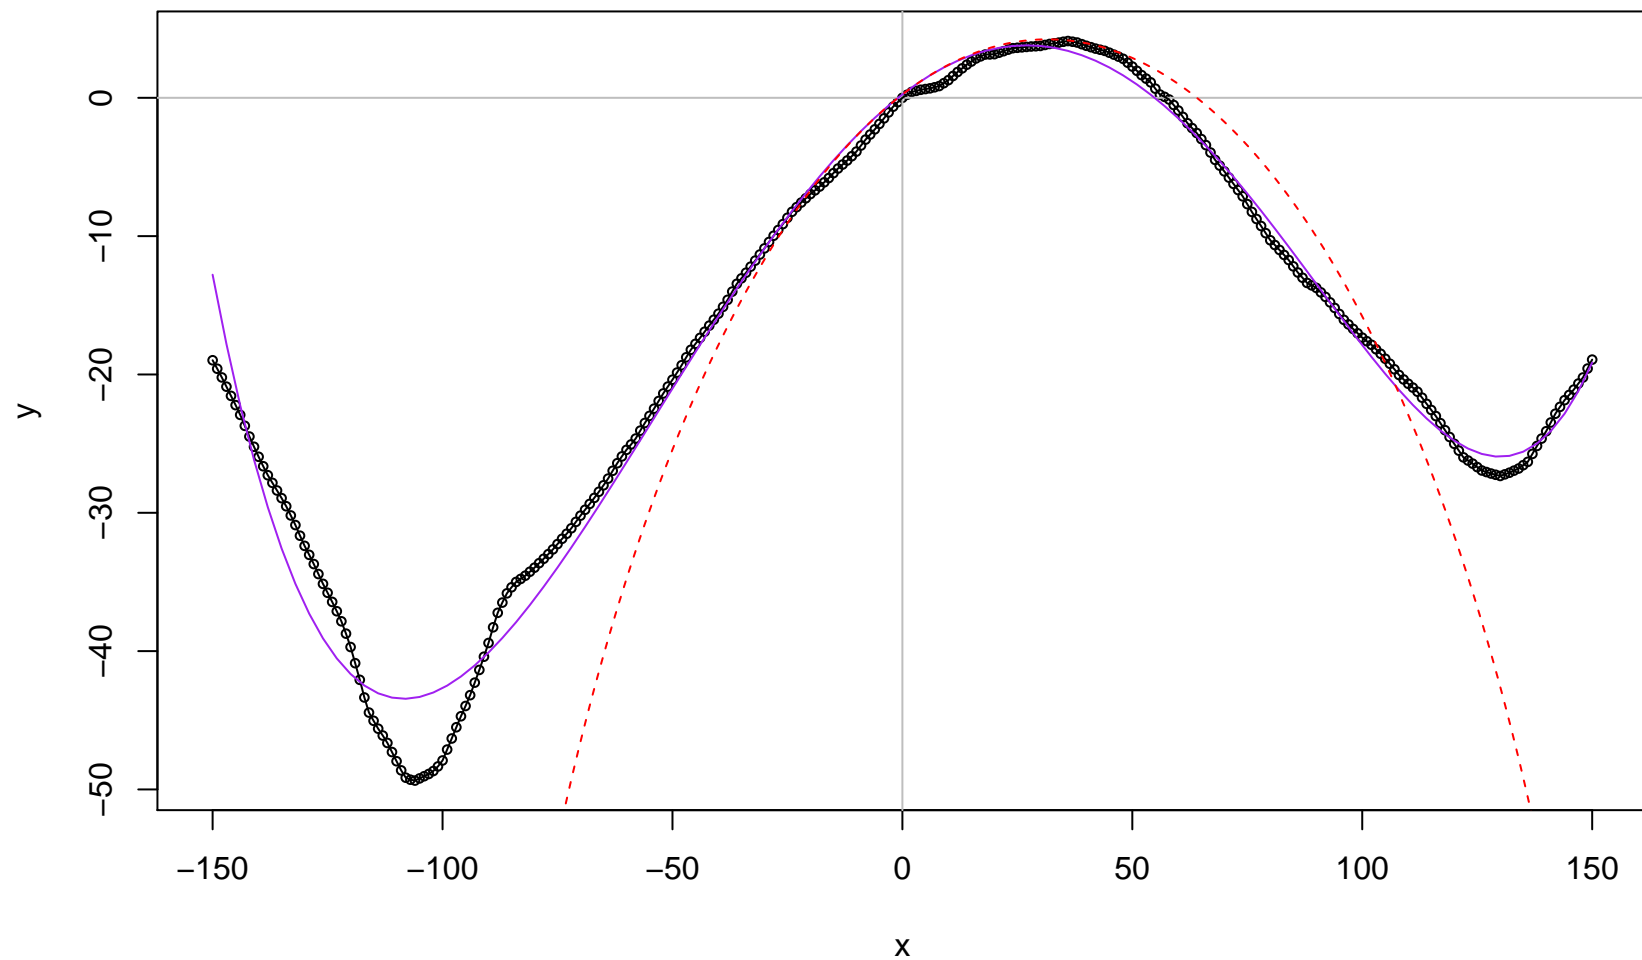

Site 63

$K \cdot 100 = 1.3387$

$R^2 = 0.9949$

radius= 74.7005

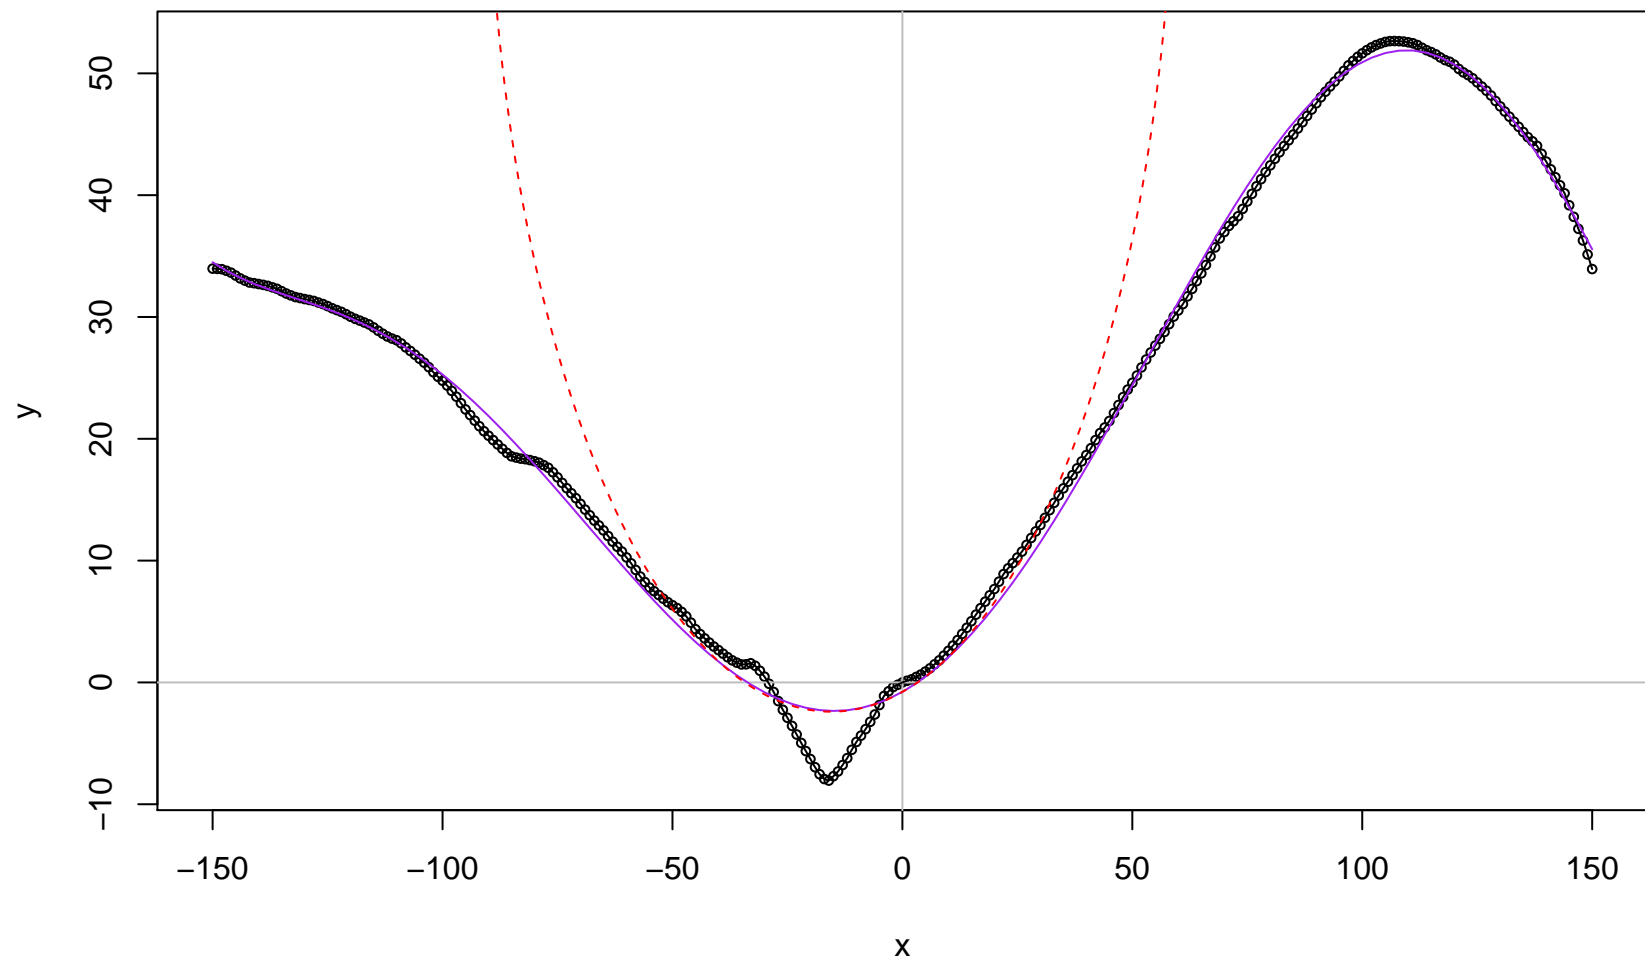

Site 64

$K \cdot 100 = 0.1007$

$R^2 = 0.9921$

radius= 992.8631

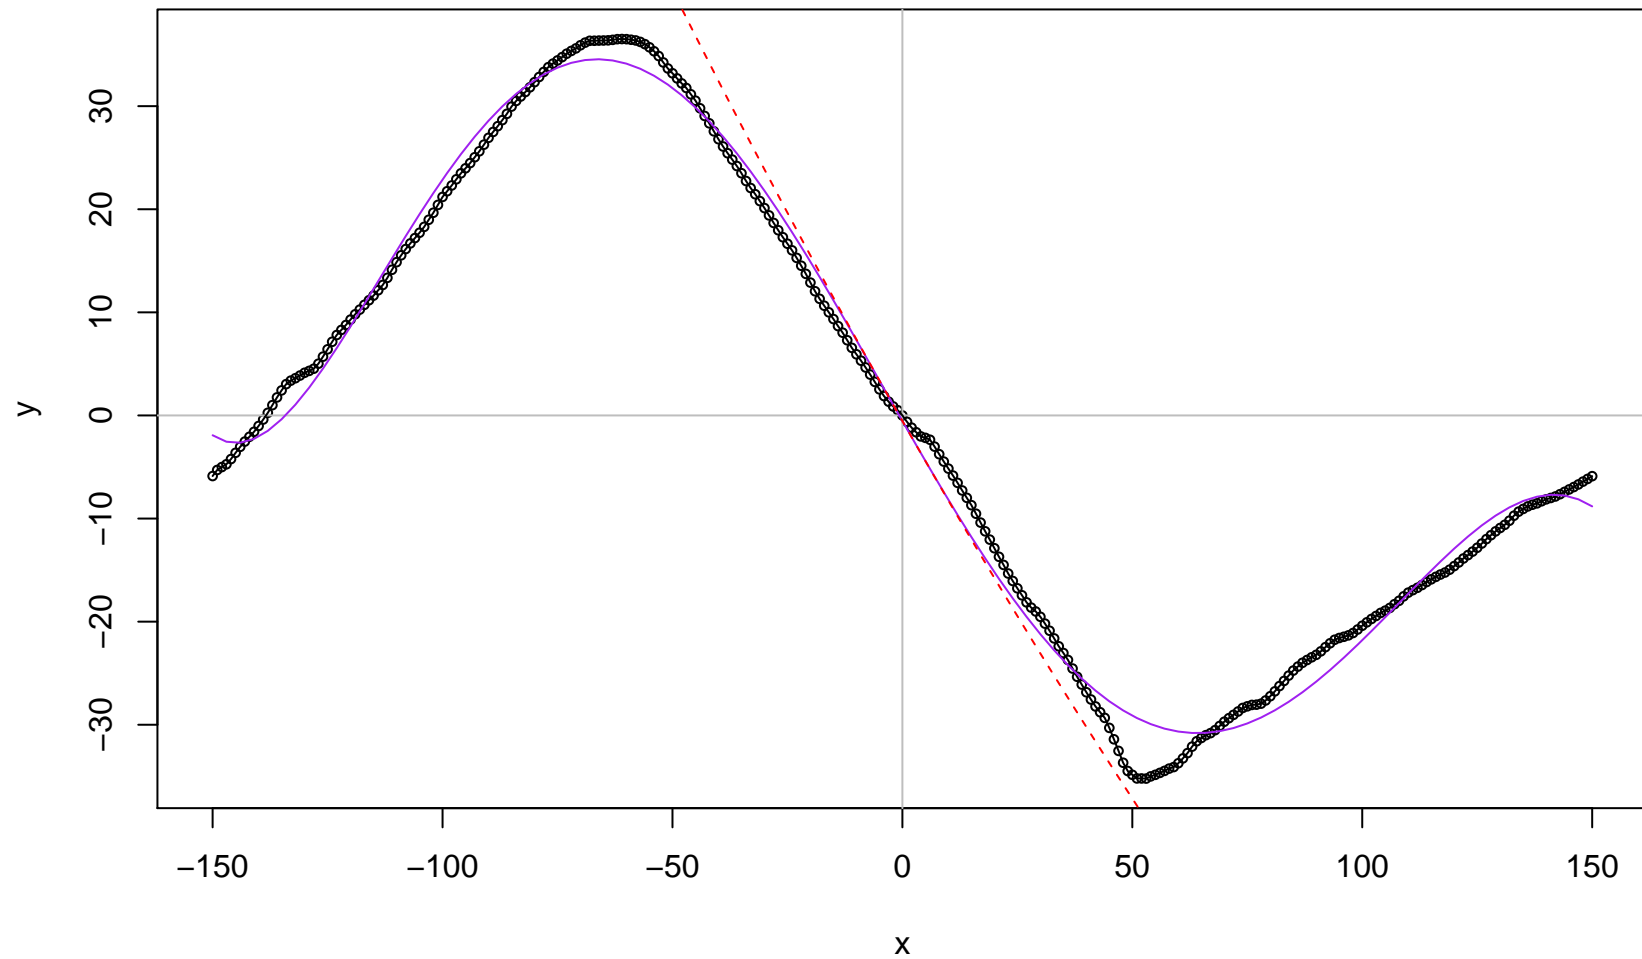



Site 65

$K*100= 1.9991$

$R^2= 0.9773$

radius= 50.0214

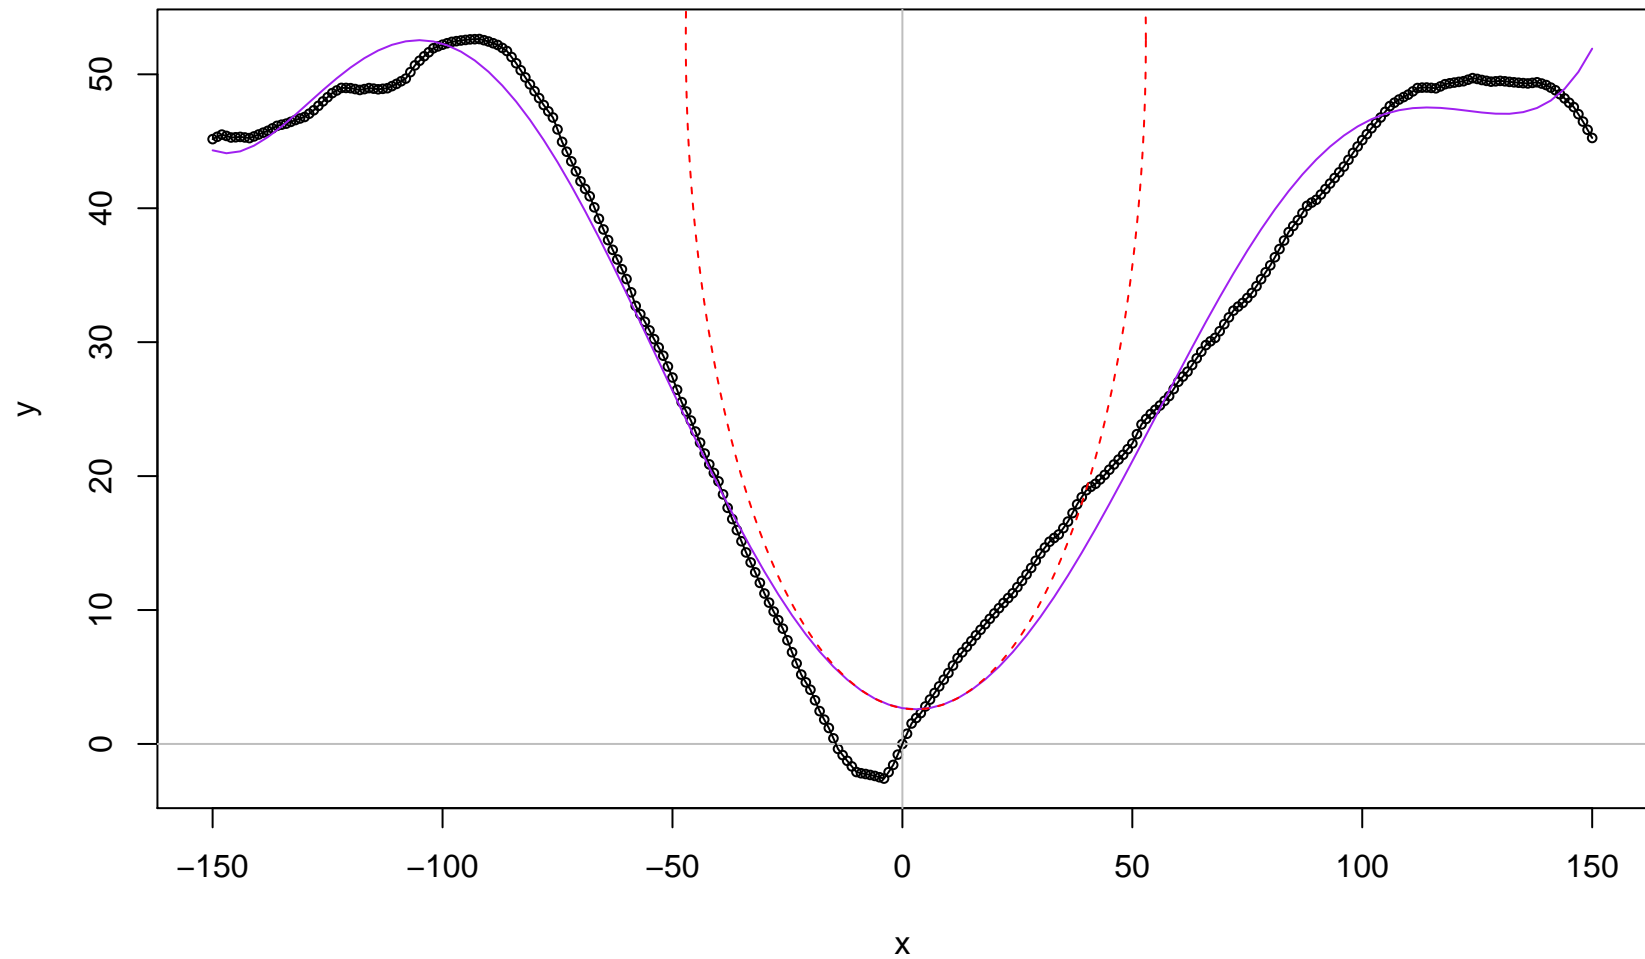

Site 66

$K*100 = -0.0649$

$R^2 = 0.8132$

radius = -1541.176

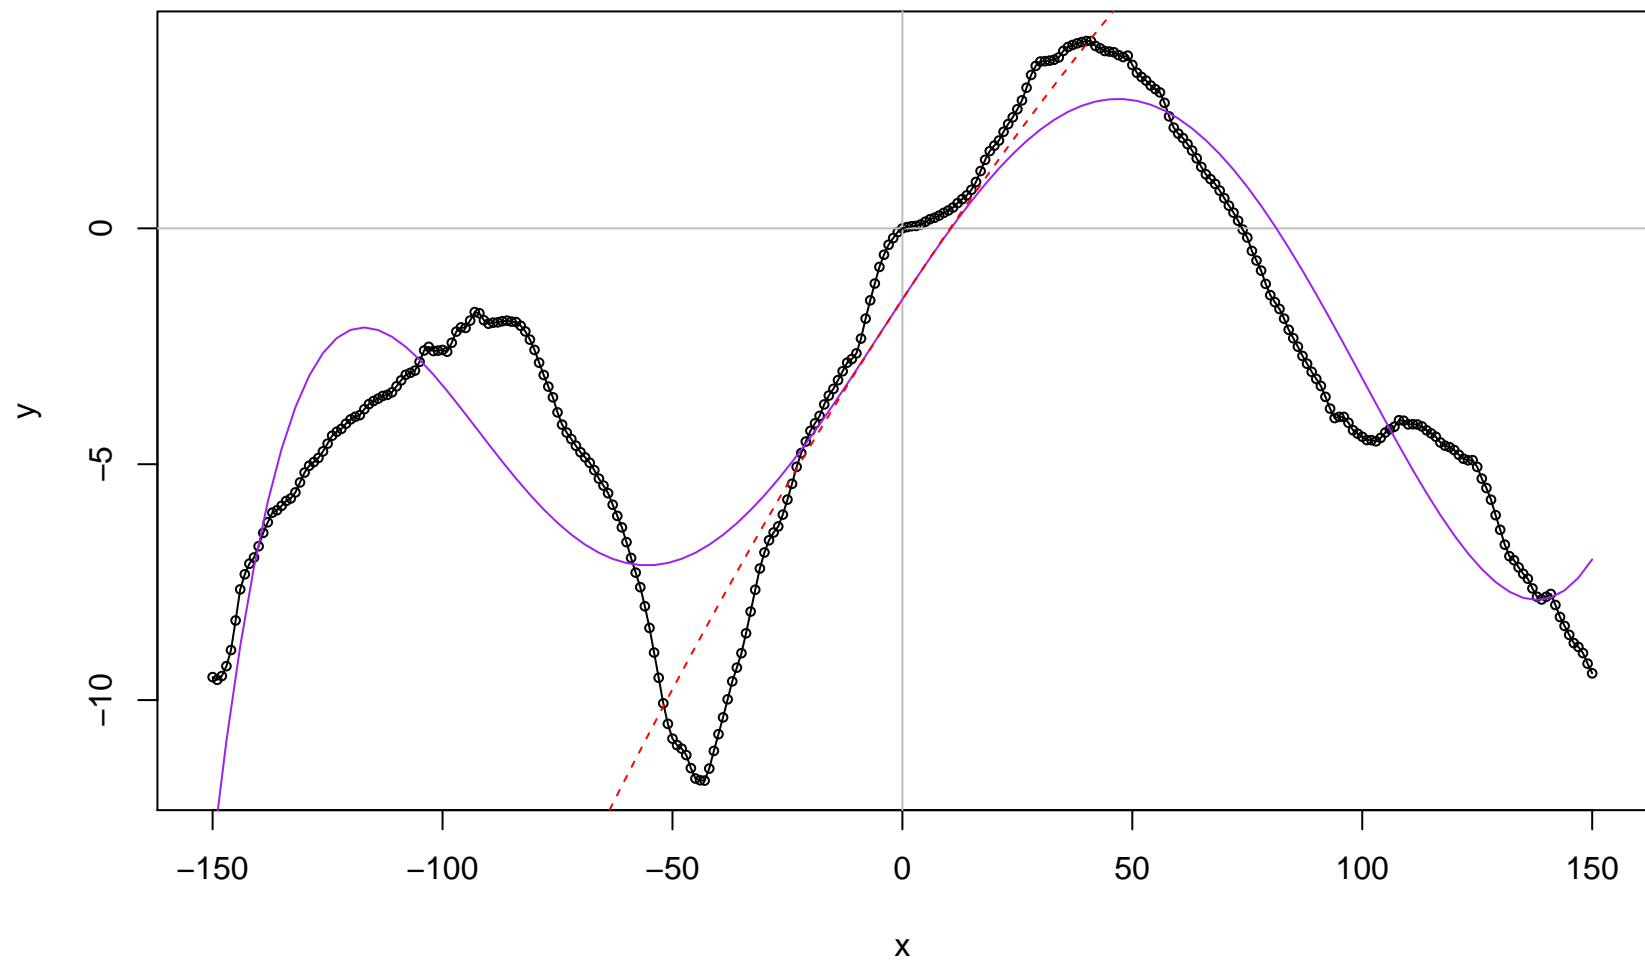

Site 67

$K \cdot 100 = -0.2697$

$R^2 = 0.9864$

radius =  $-370.7223$

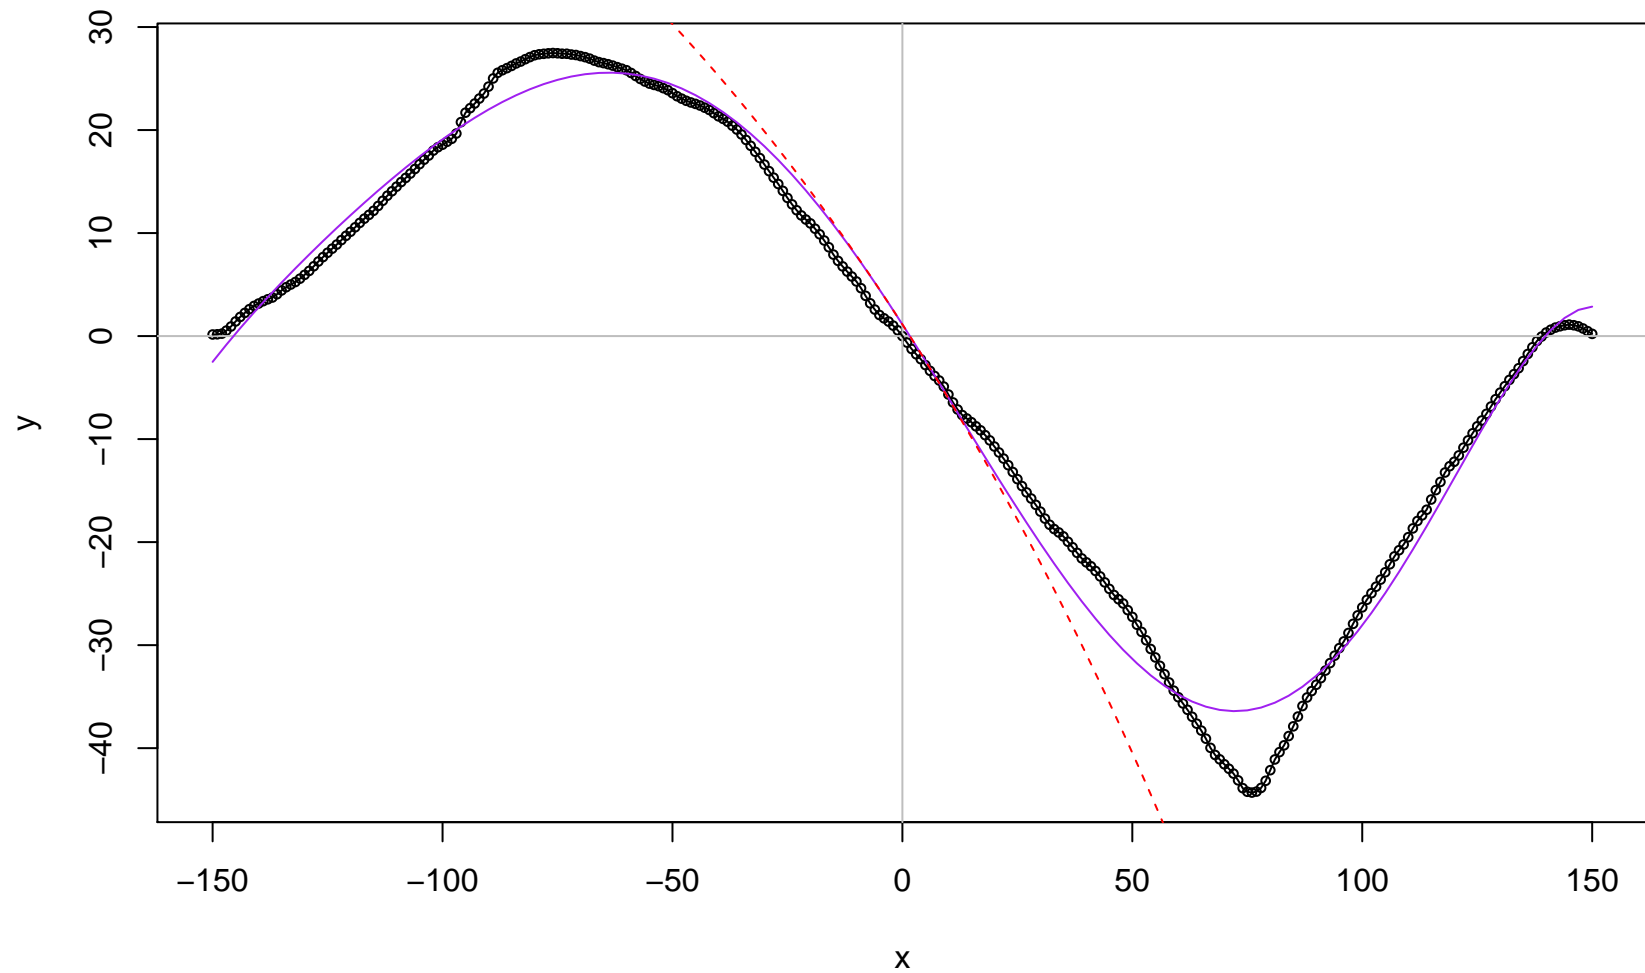

Site 68

$K*100= 0.0992$

$R^2= 0.9708$

radius= 1007.9443

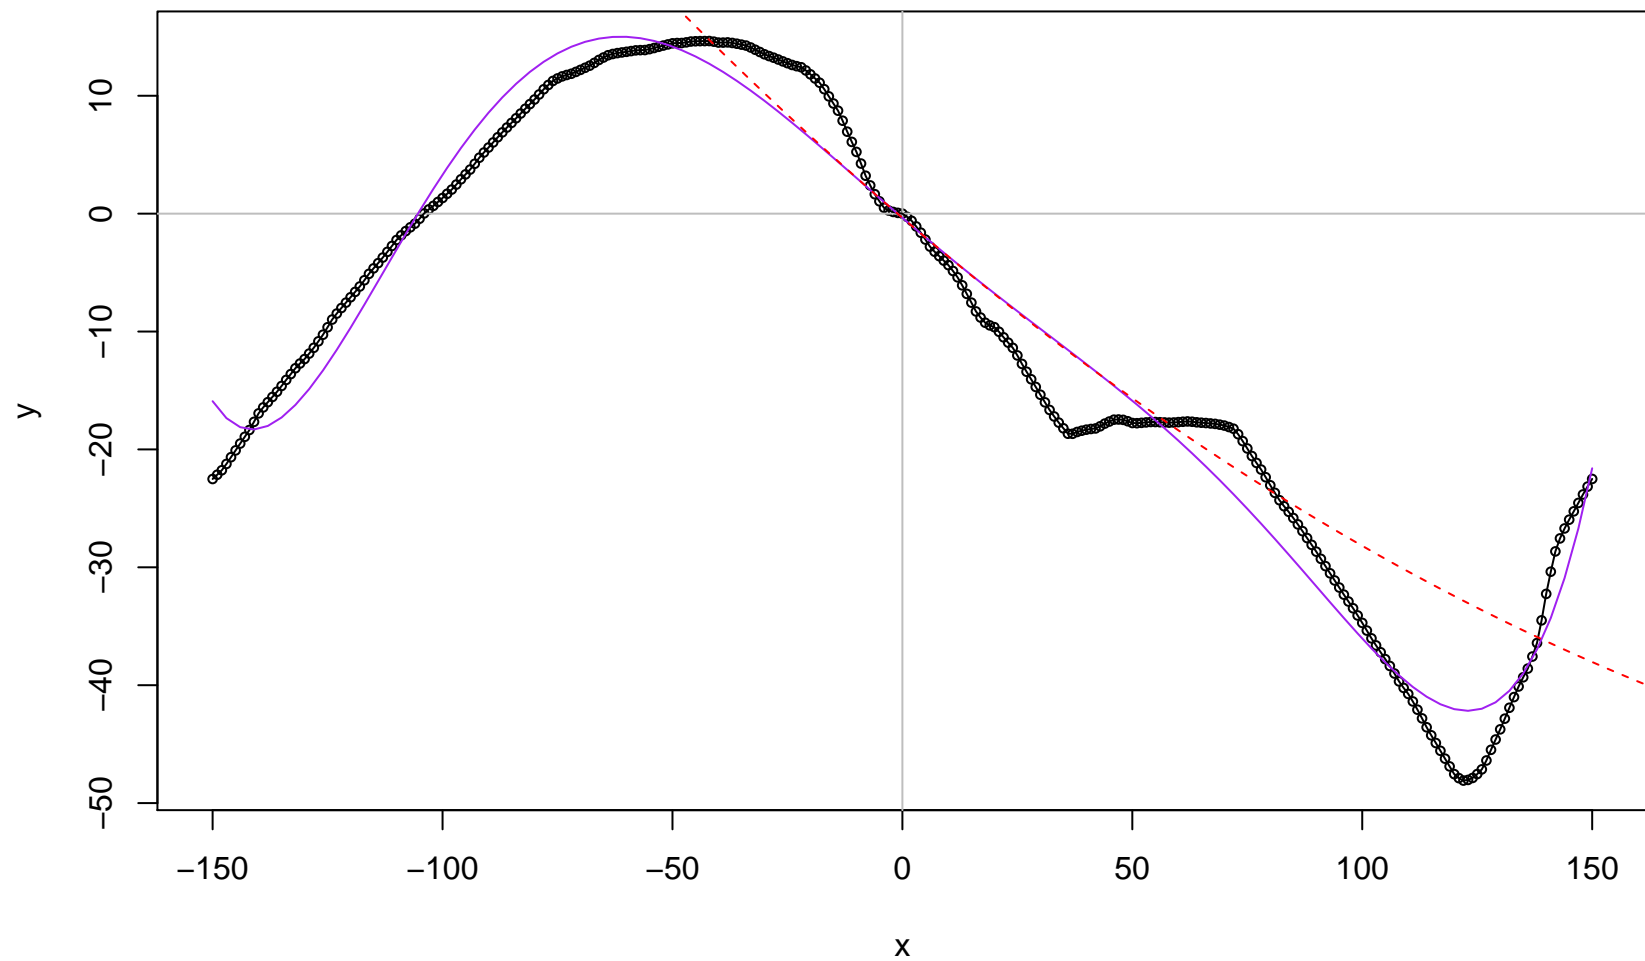

Site 69

$K*100 = -0.032$

$R^2 = 0.9754$

radius= -3120.8278

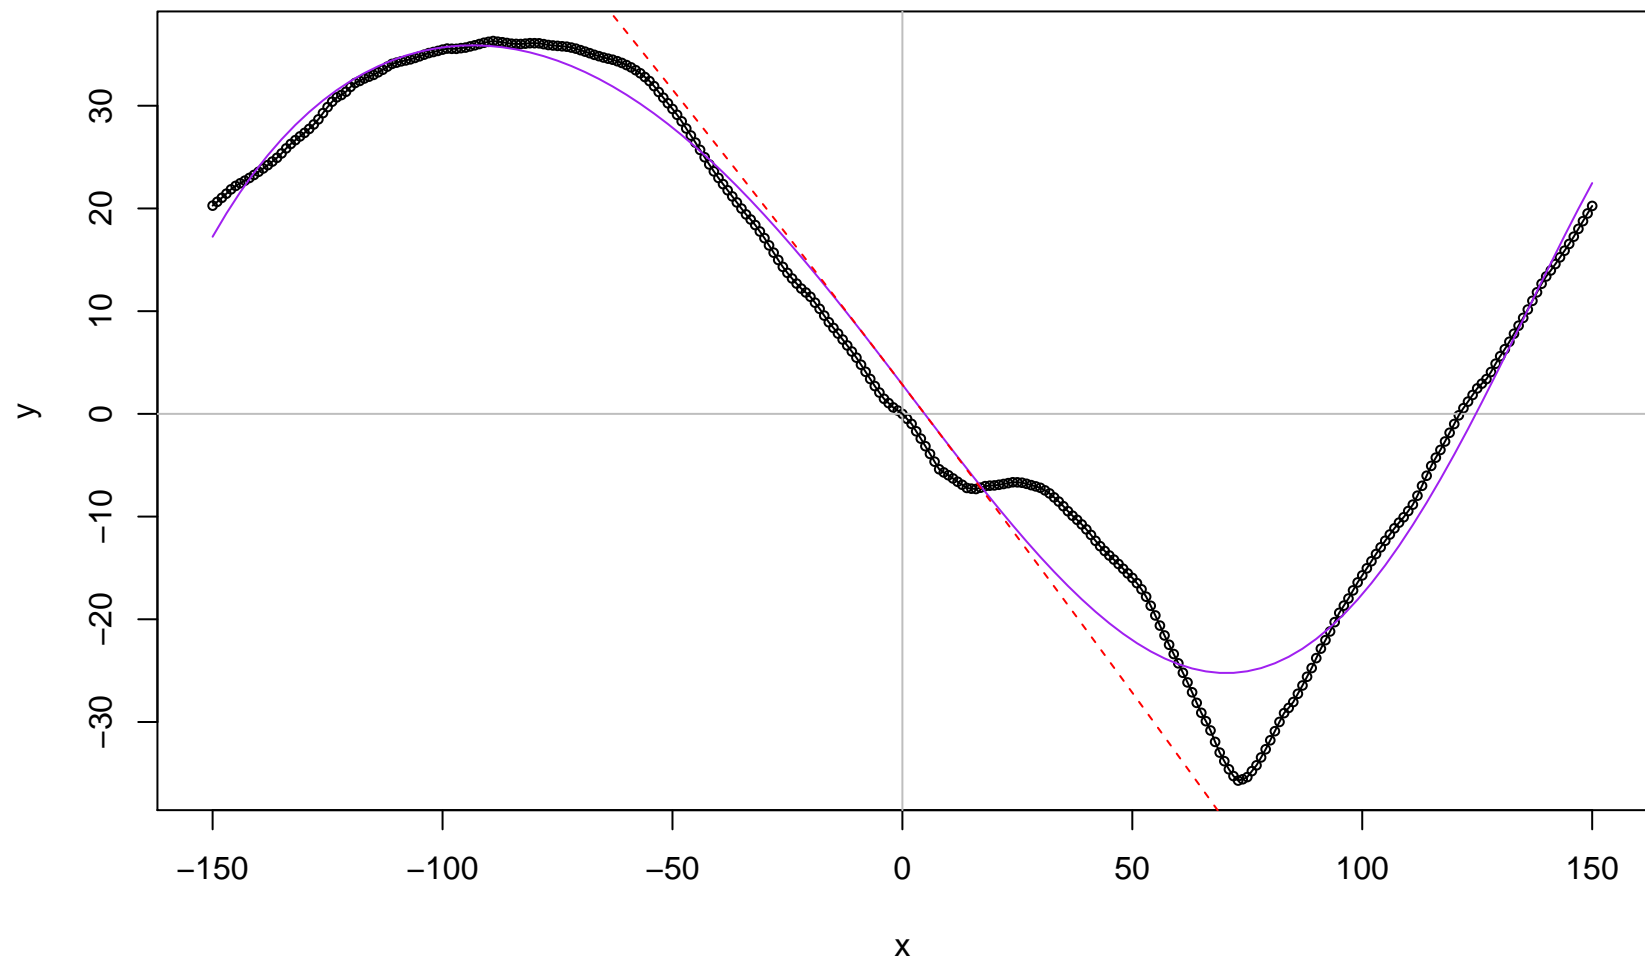

Site 70

$K \cdot 100 = 0.0048$

$R^2 = 0.9793$

radius= 20793.3193

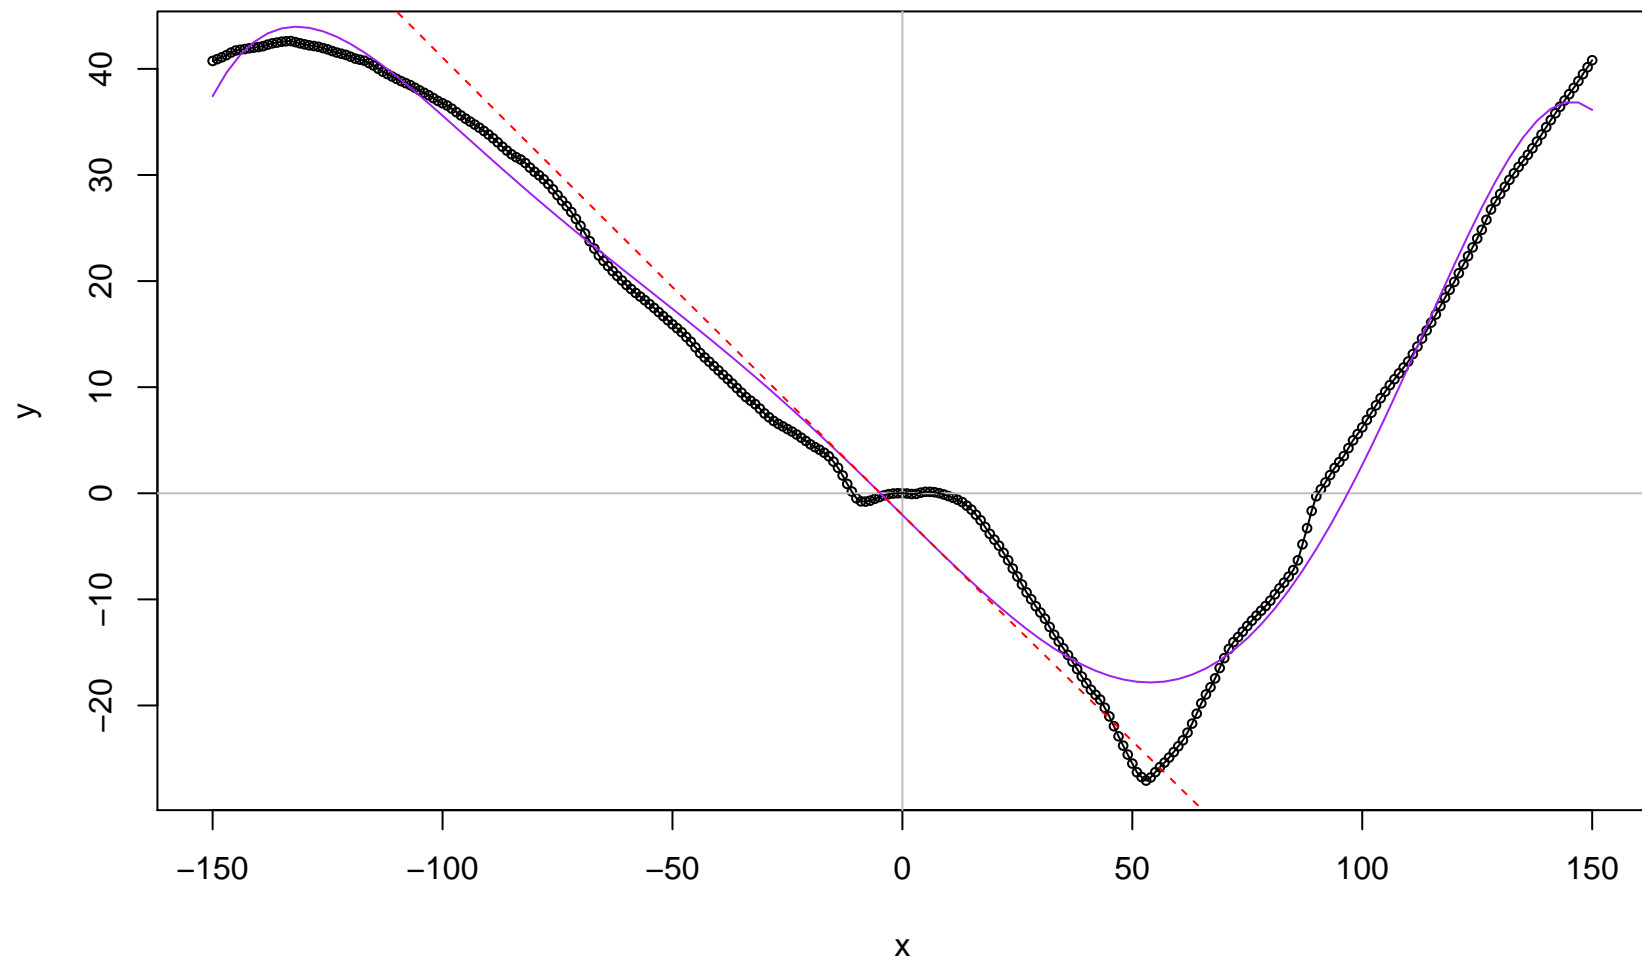

Site 71

$K \cdot 100 = 0.3713$

$R^2 = 0.9916$

radius= 269.3321

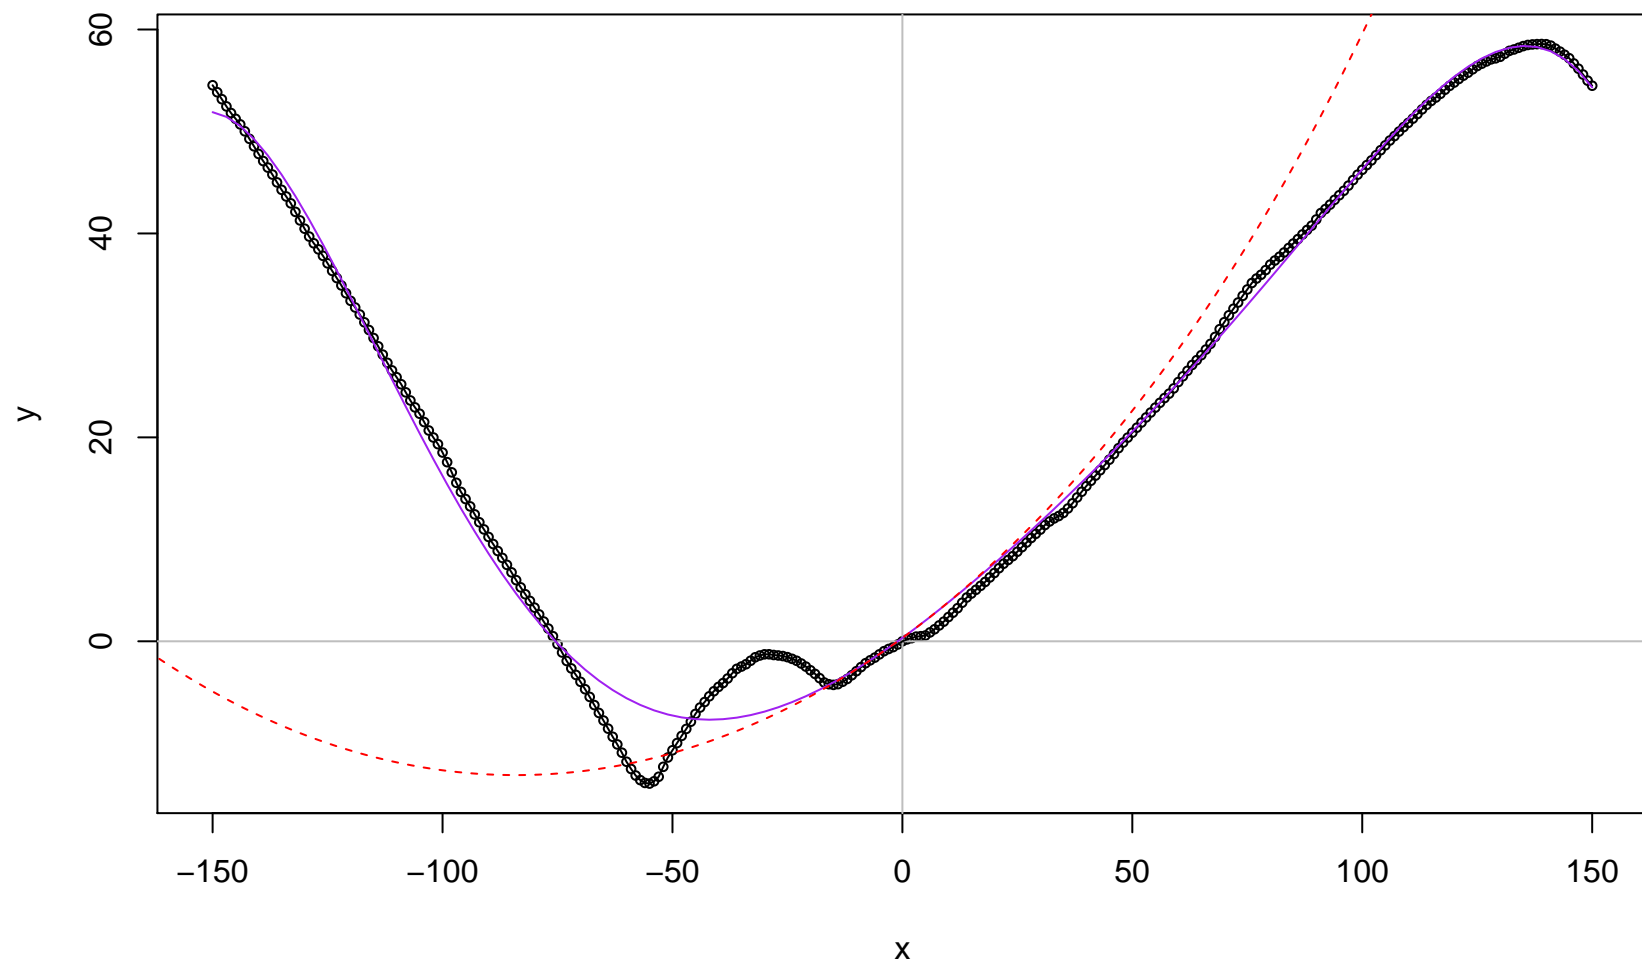

Site 72

$K \cdot 100 = -0.0891$

$R^2 = 0.9885$

radius =  $-1121.9443$

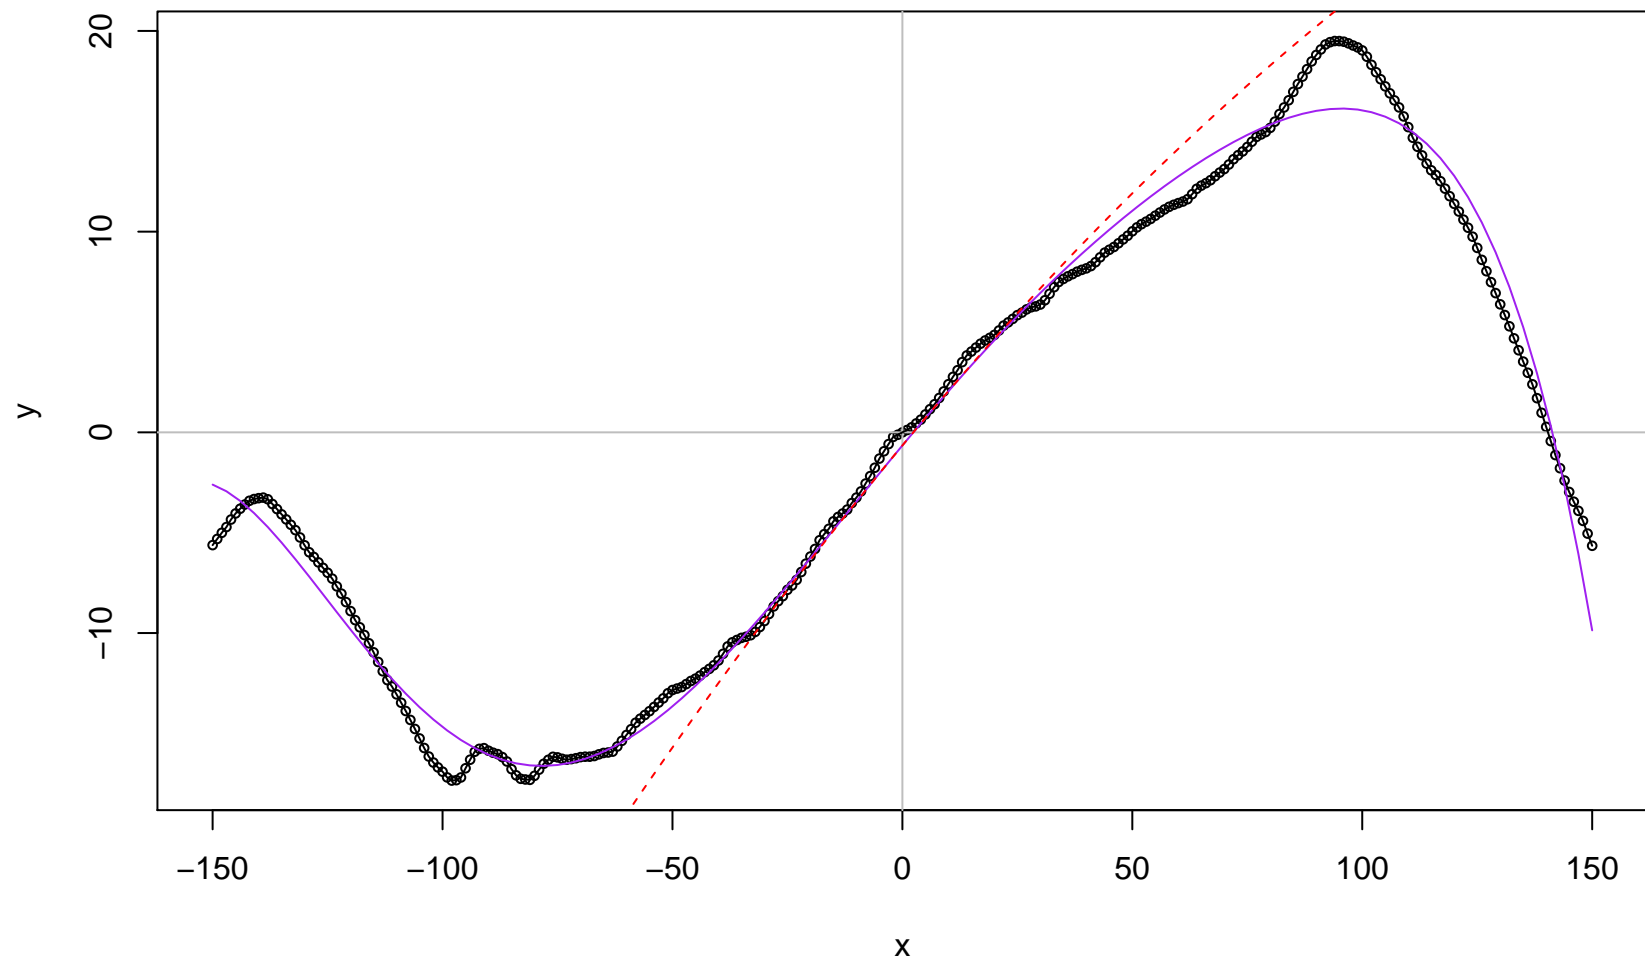



Site 73

$K \cdot 100 = 0.9465$

$R^2 = 0.9899$

radius = 105.6561

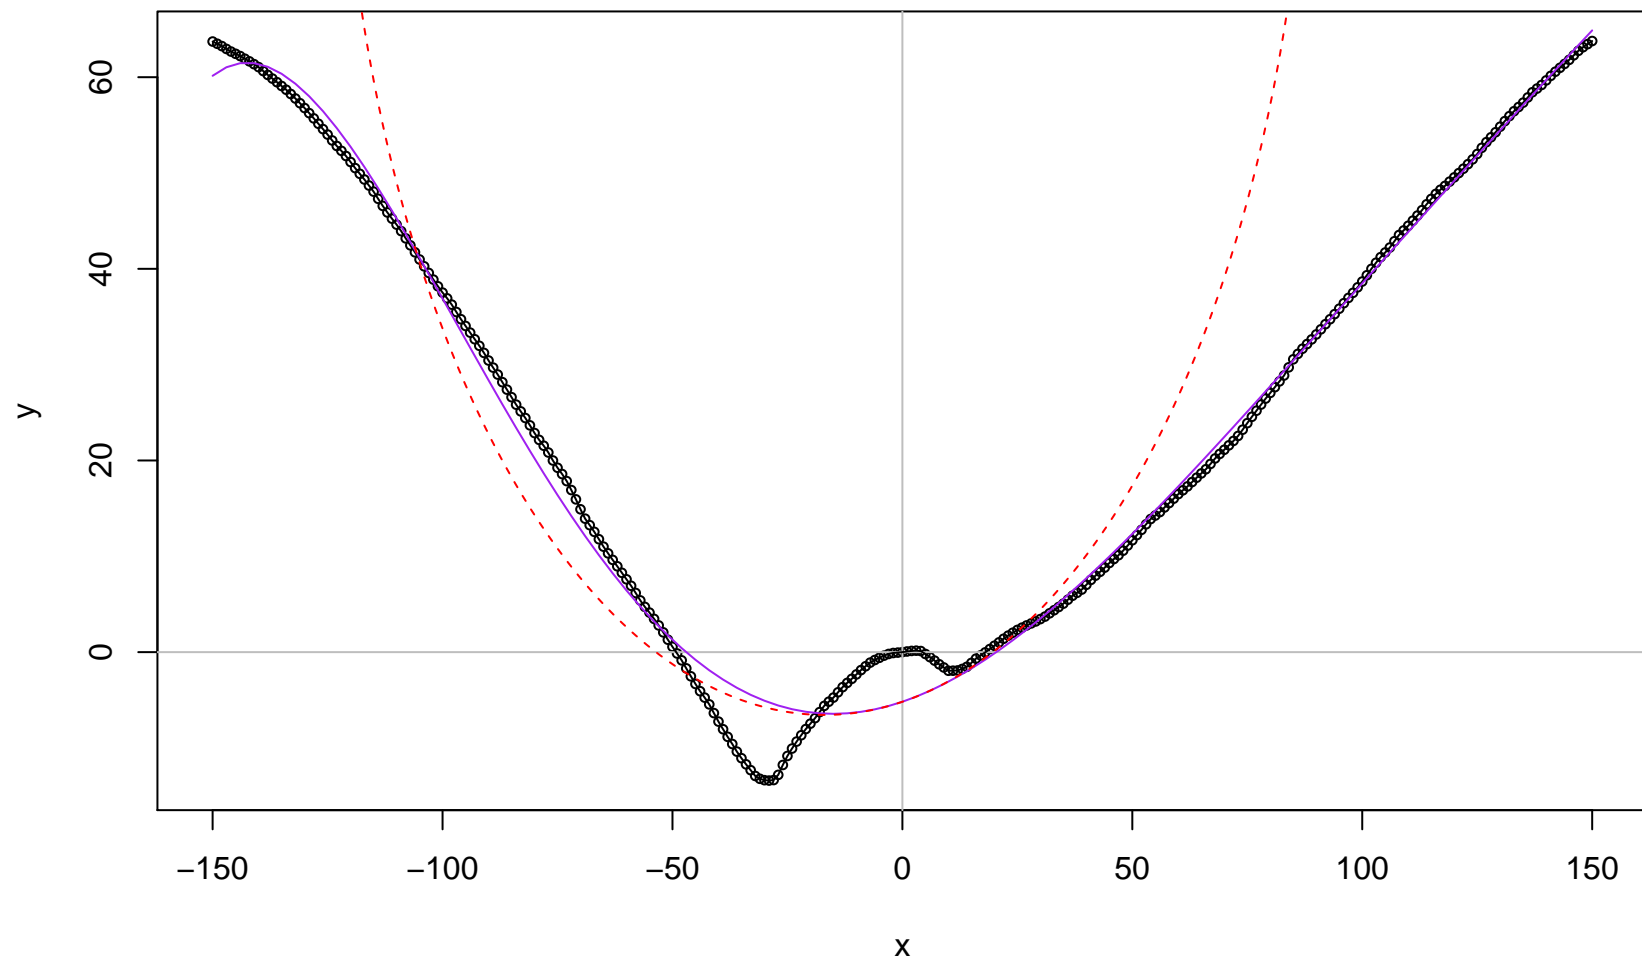

Site 74

$K \cdot 100 = 1.6406$

$R^2 = 0.9952$

radius= 60.9517

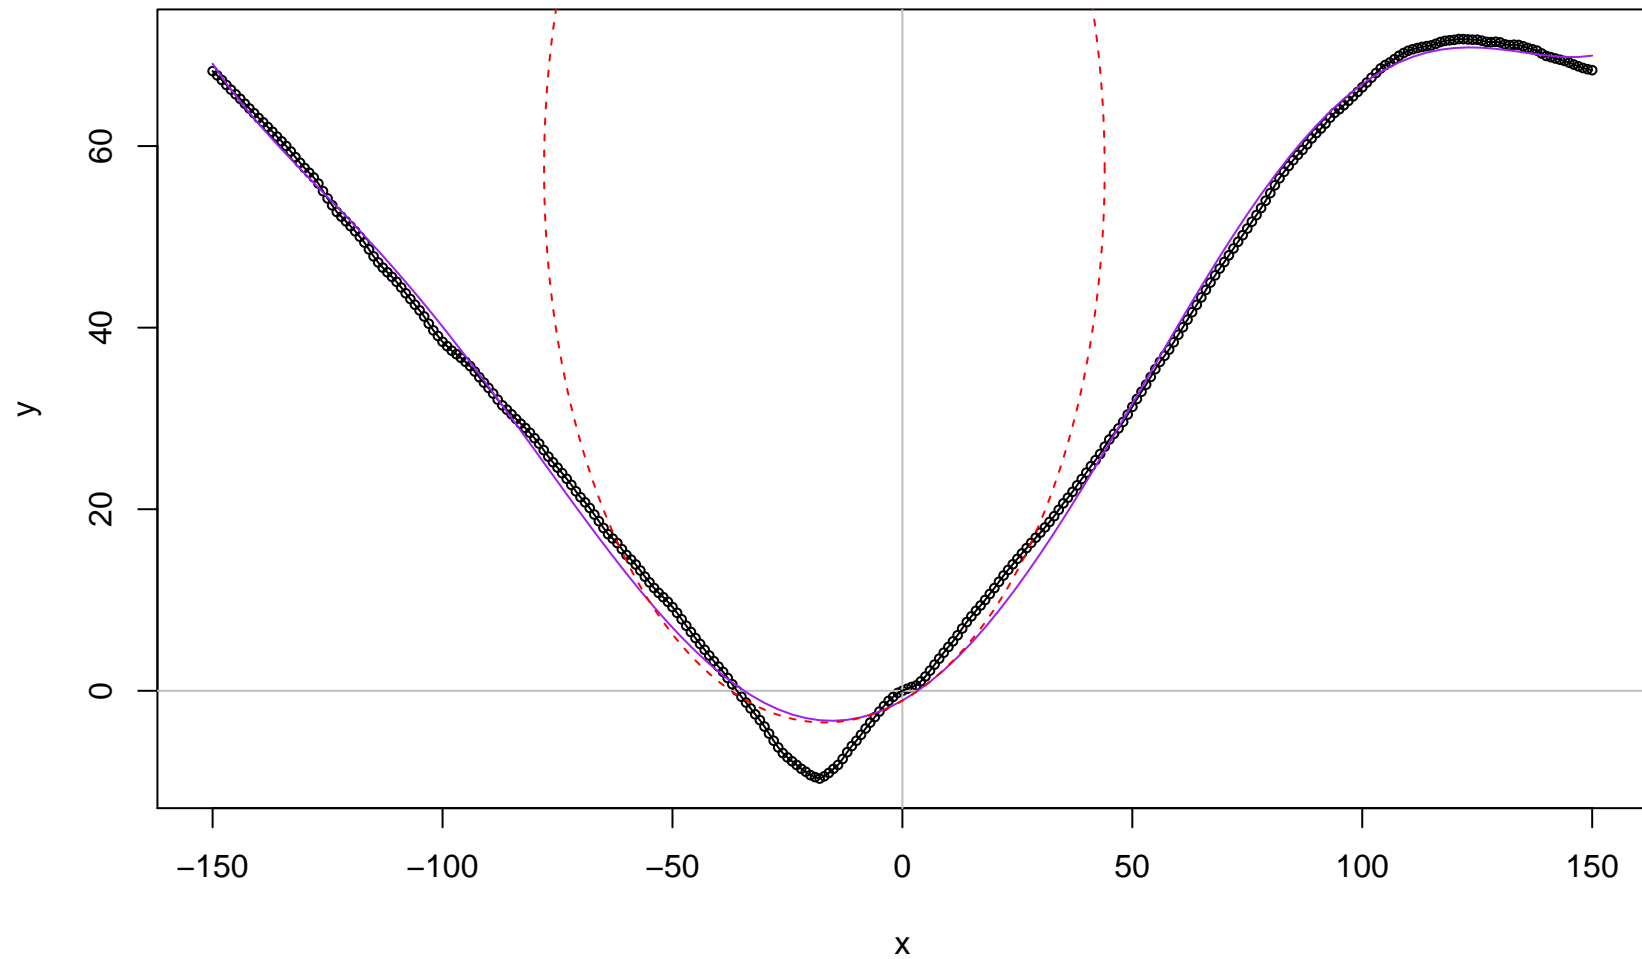

Site 75

$K*100 = -0.5811$

$R^2 = 0.994$

radius =  $-172.0747$

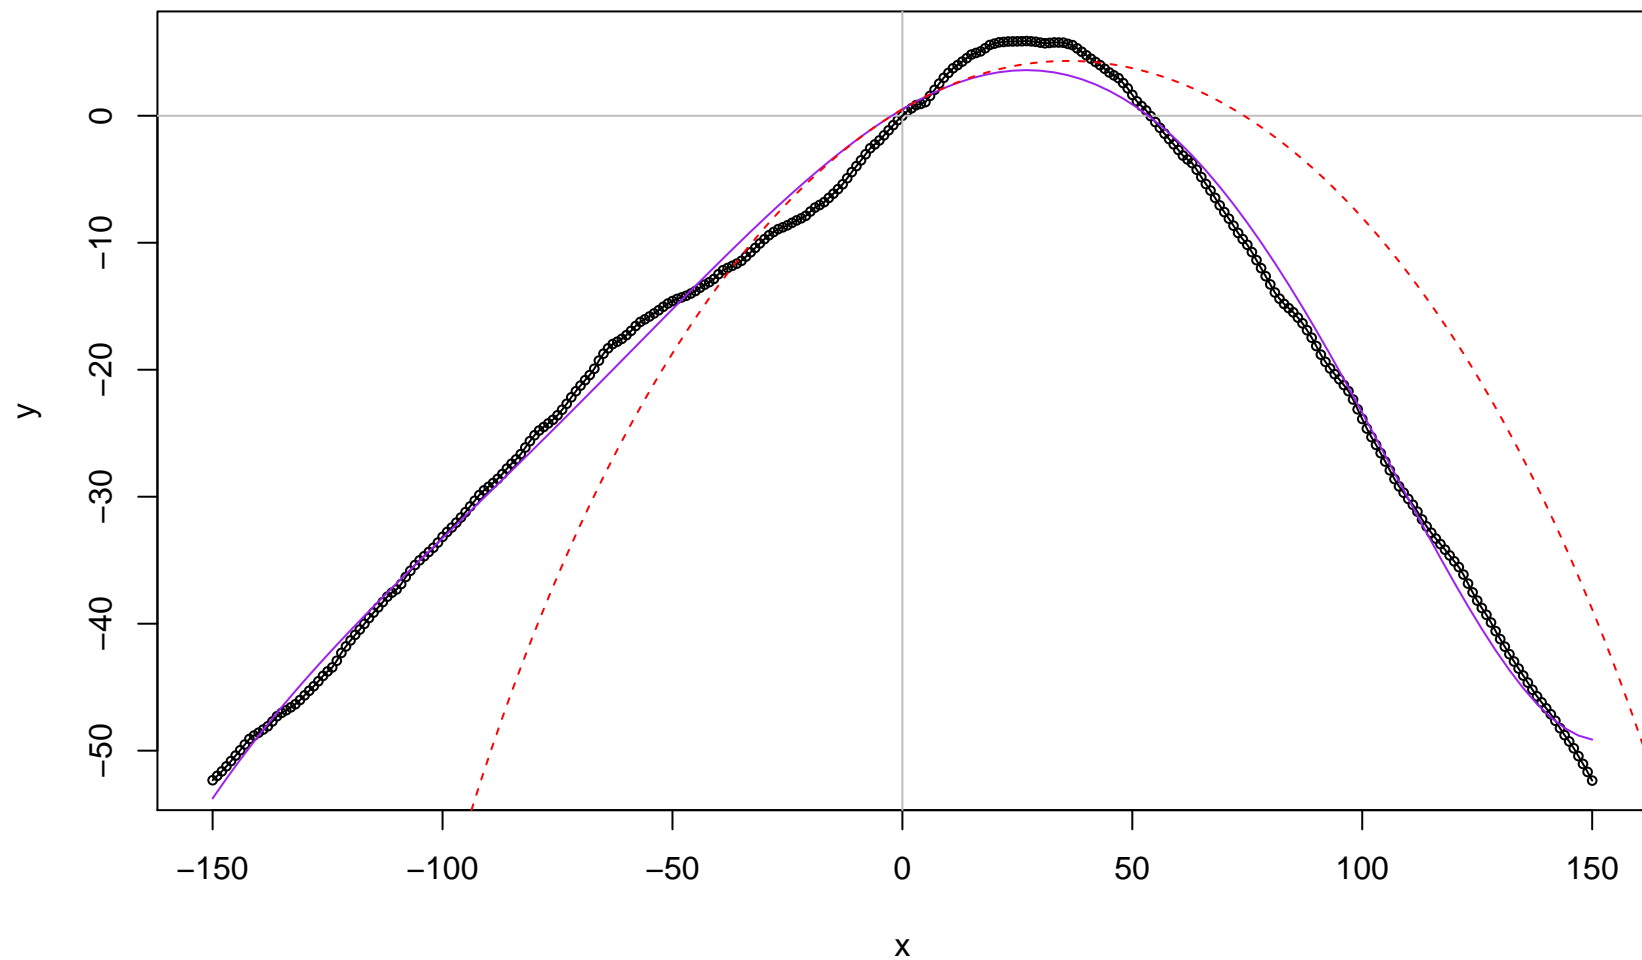

Site 76

$K*100 = -0.7121$

$R^2 = 0.9983$

radius =  $-140.4229$

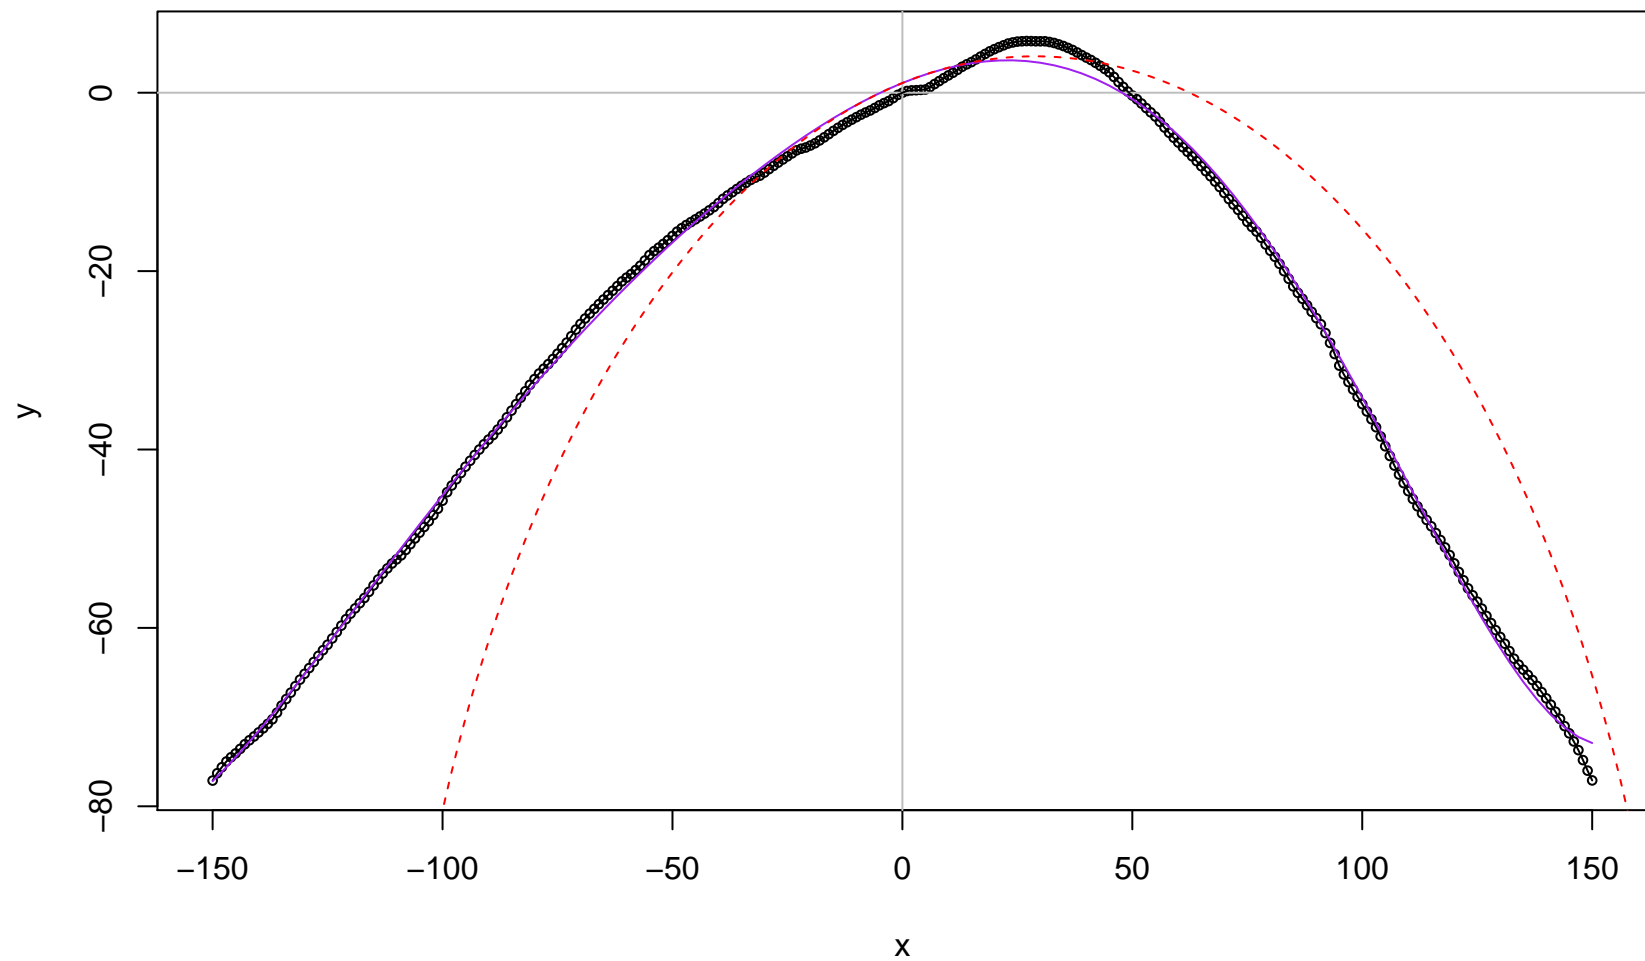

Site 77

$K*100 = -0.0452$

$R^2 = 0.9613$

radius = -2214.2694

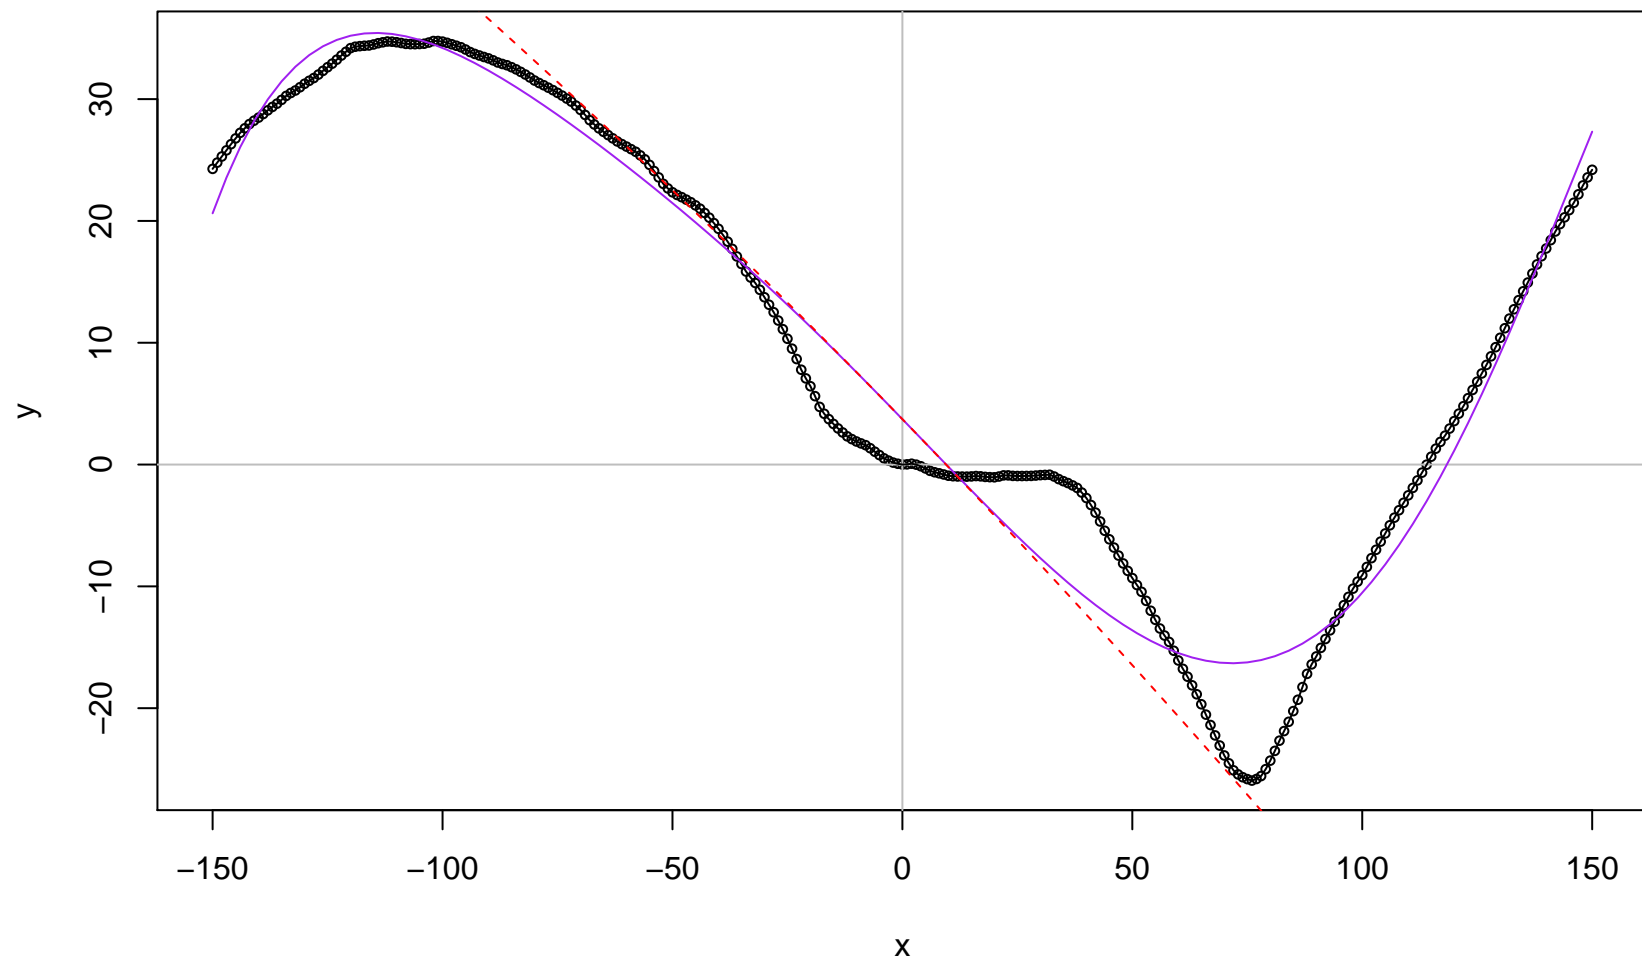

Site 78

$K*100 = -0.8832$

$R^2 = 0.986$

radius =  $-113.2196$

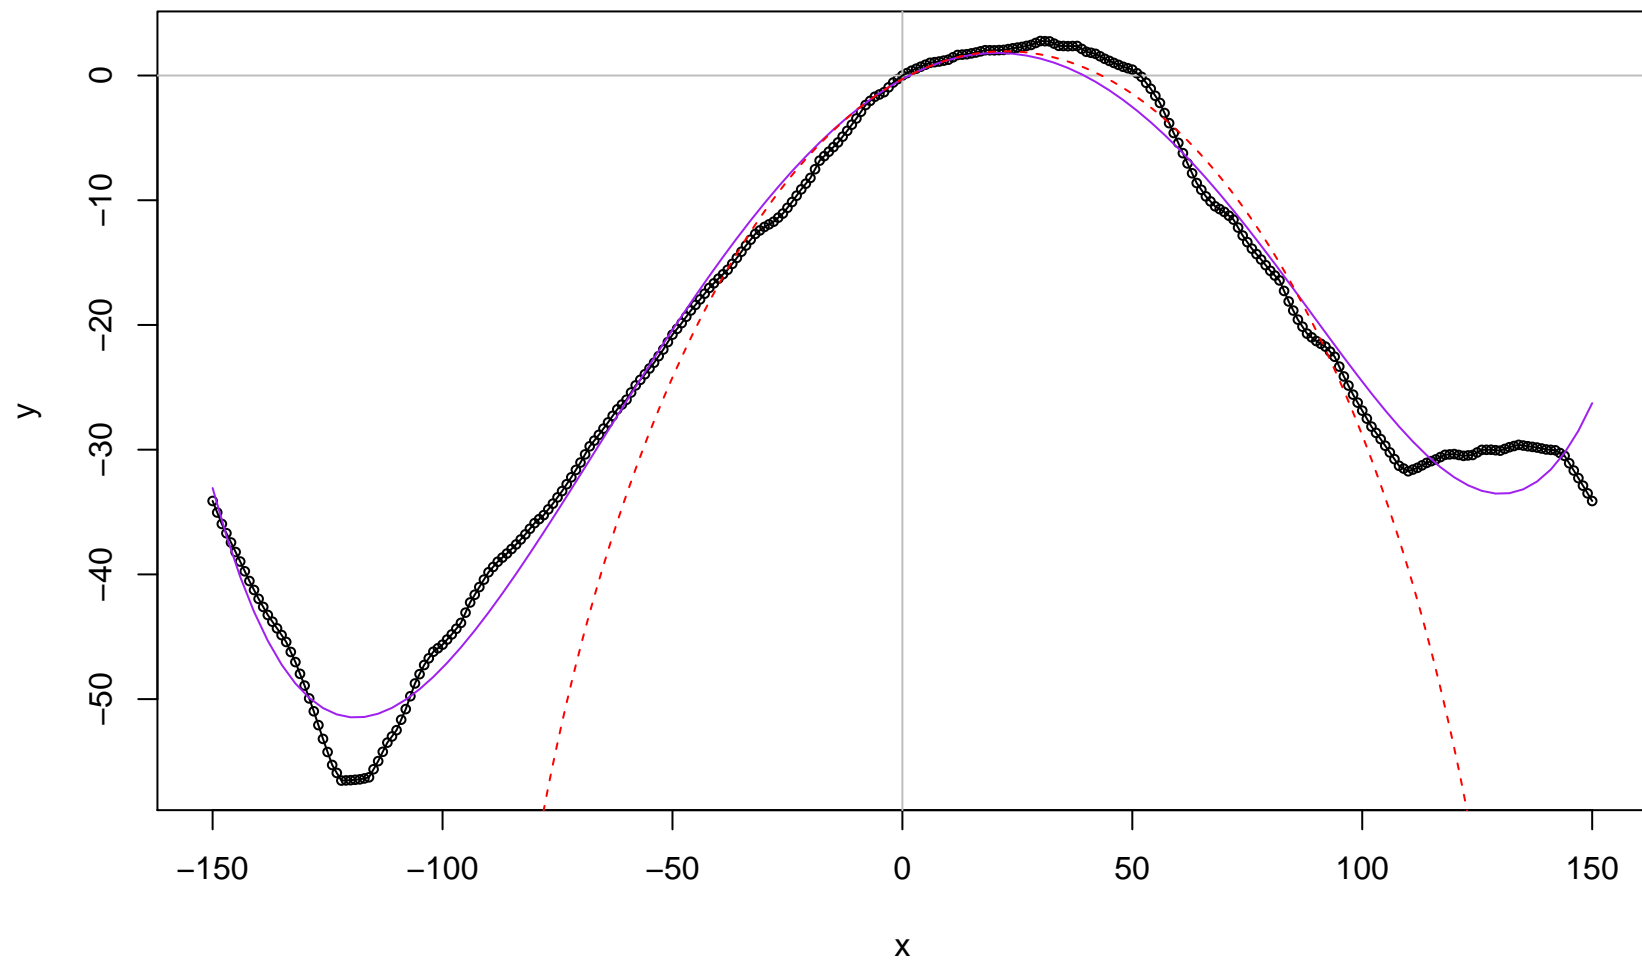

Site 79

$K \cdot 100 = 0.3016$

$R^2 = 0.9848$

radius= 331.5355

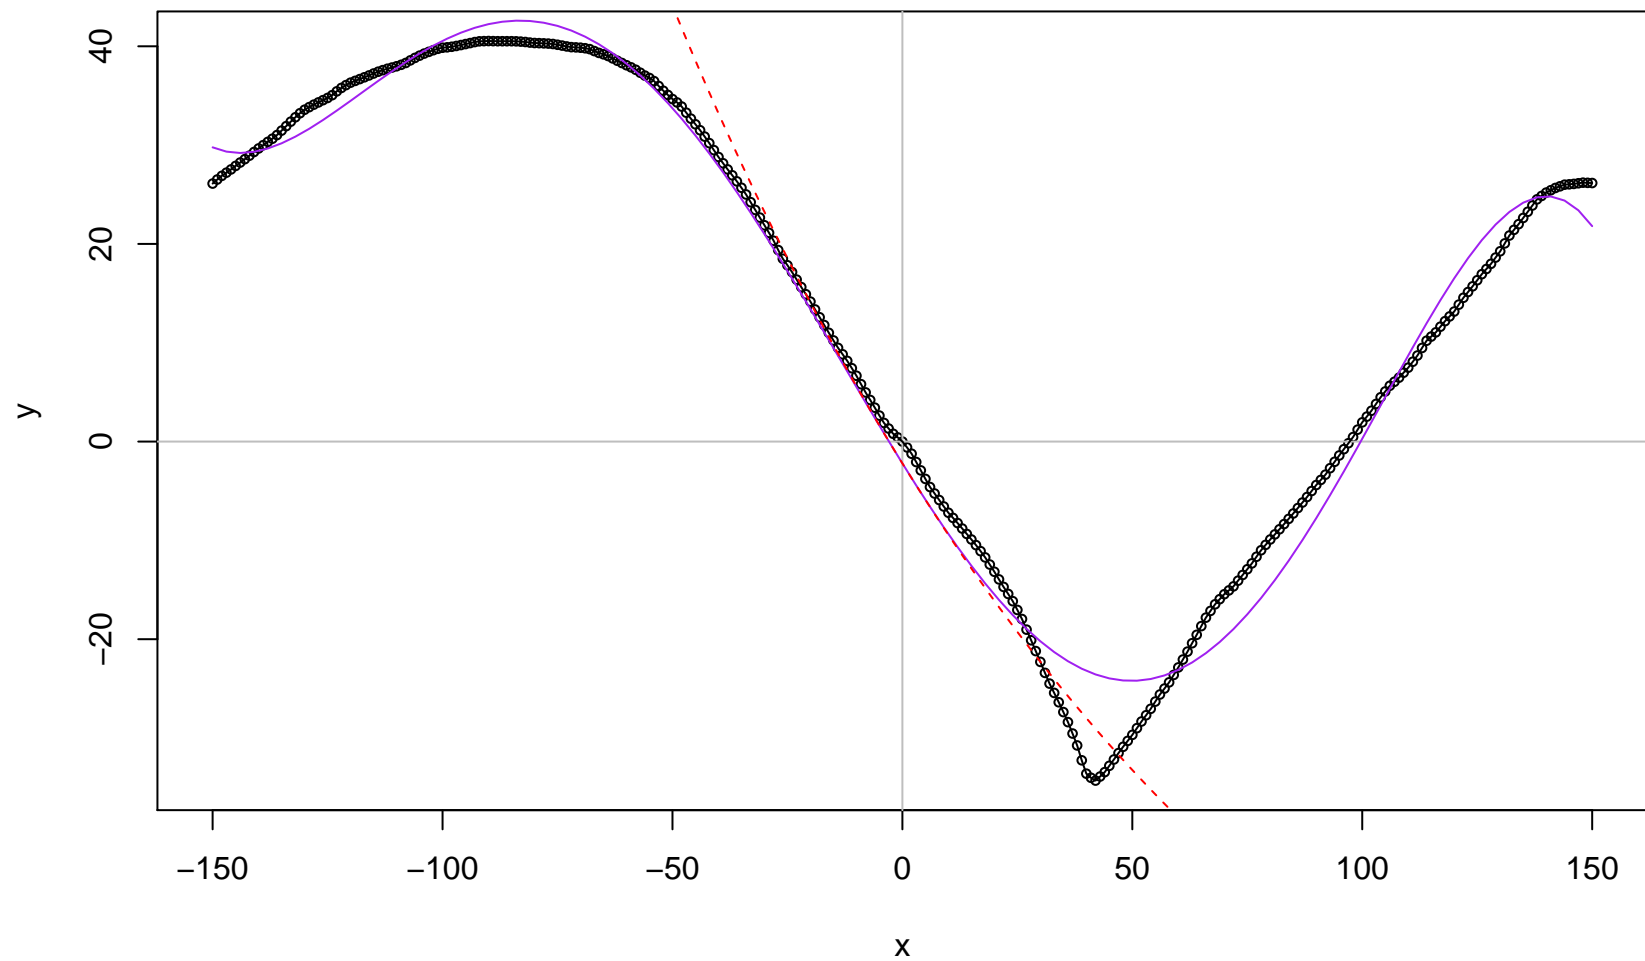

Site 80

$K*100 = -0.4519$

$R^2 = 0.9495$

radius =  $-221.3063$

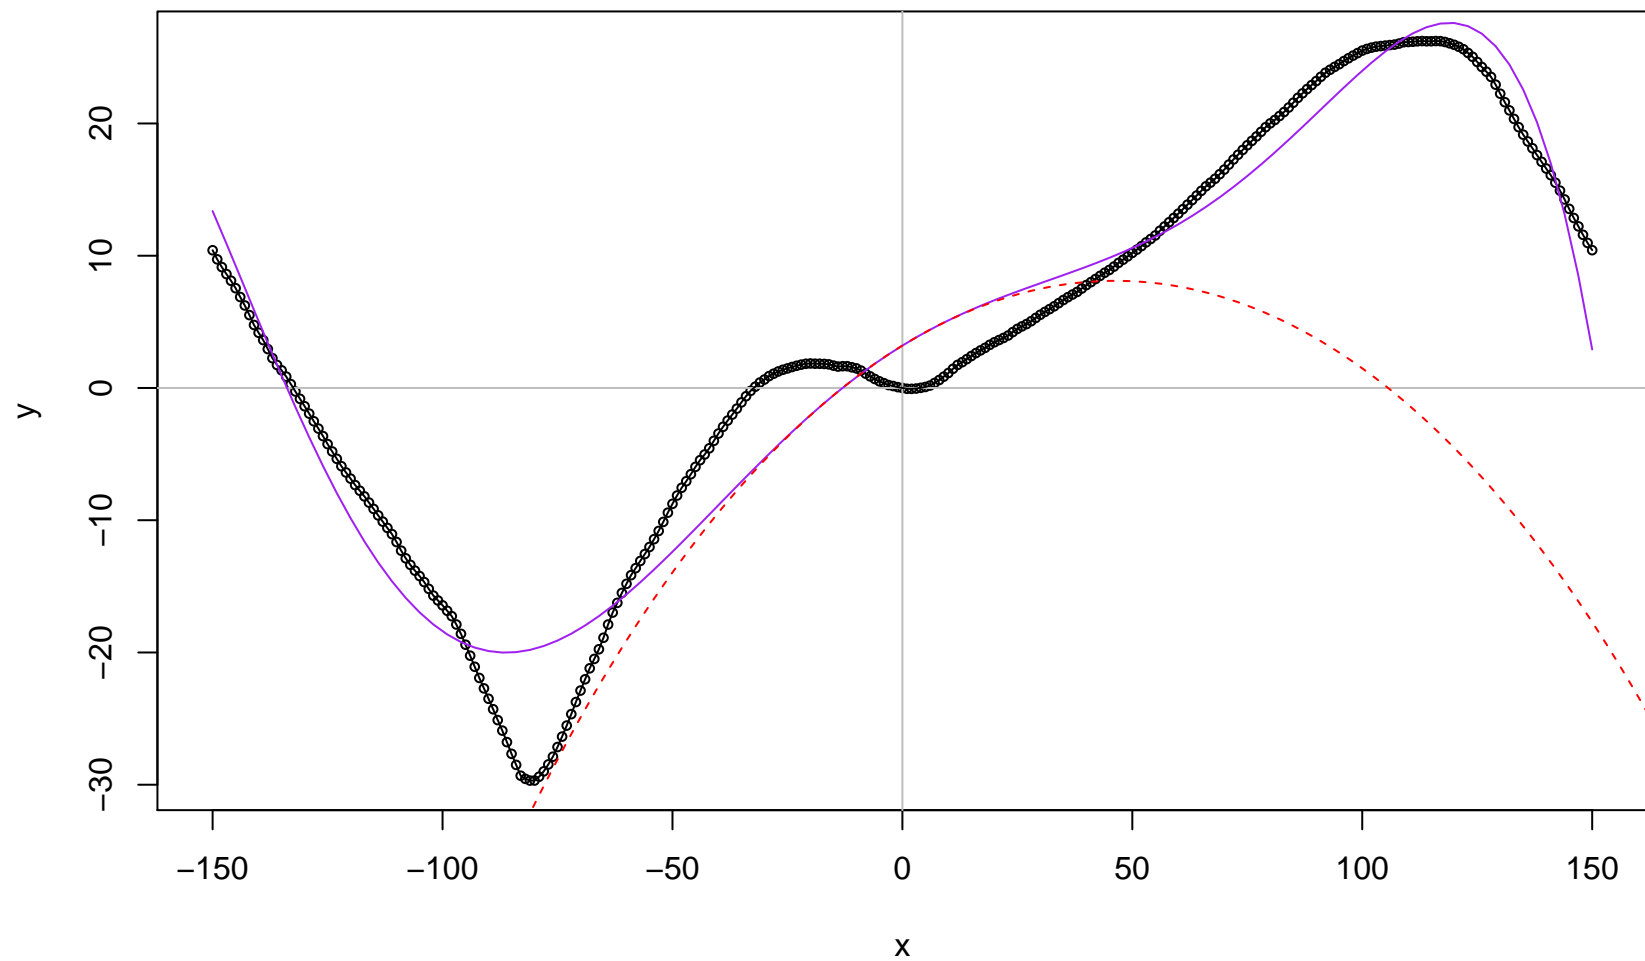



Site 81

$K*100 = -0.3683$

$R^2 = 0.9963$

radius = -271.5489

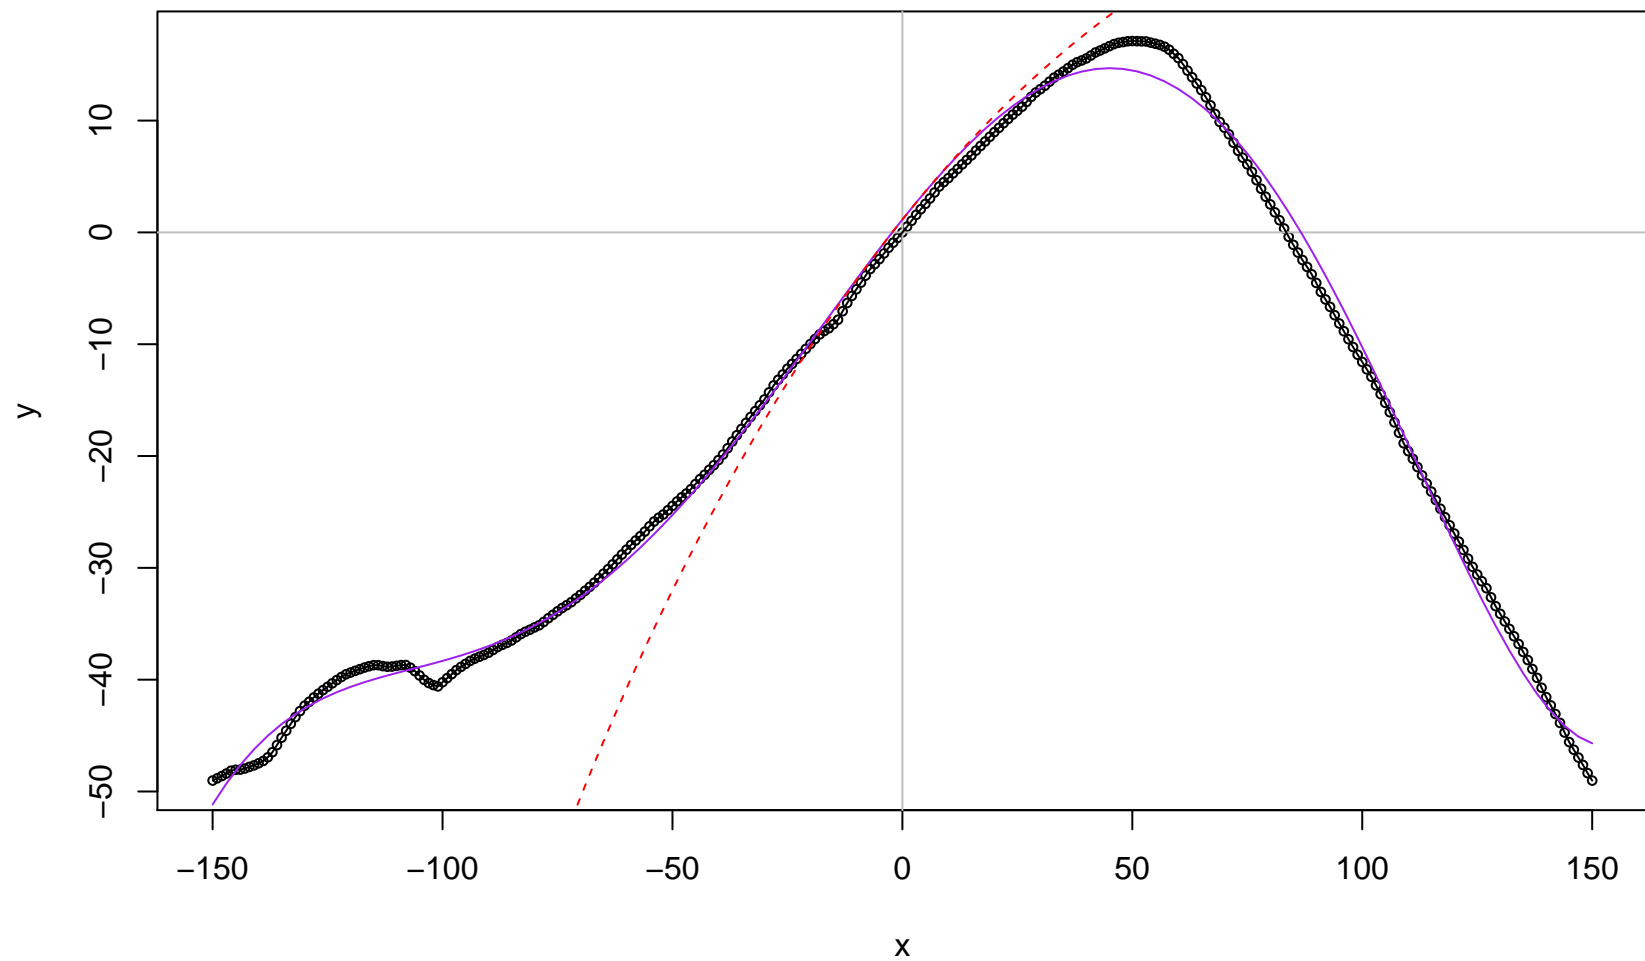

Site 82

$K*100= 1.571$

$R^2= 0.9874$

radius= 63.6538

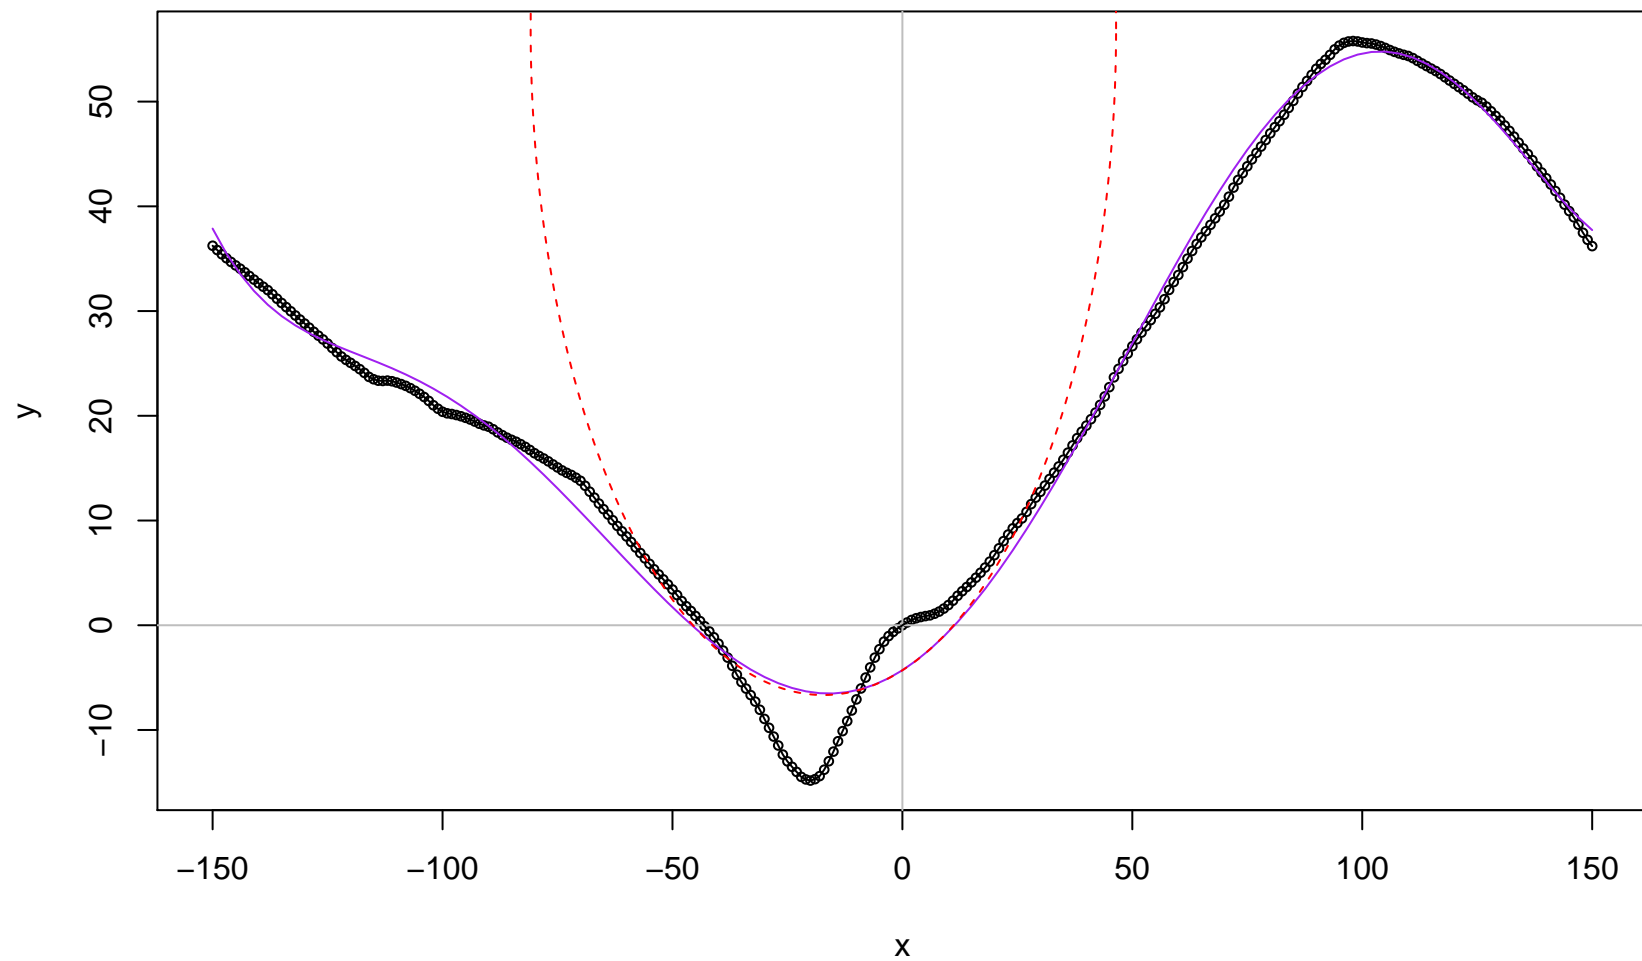

Site 83

$K \cdot 100 = 0.816$

$R^2 = 0.9746$

radius= 122.5543

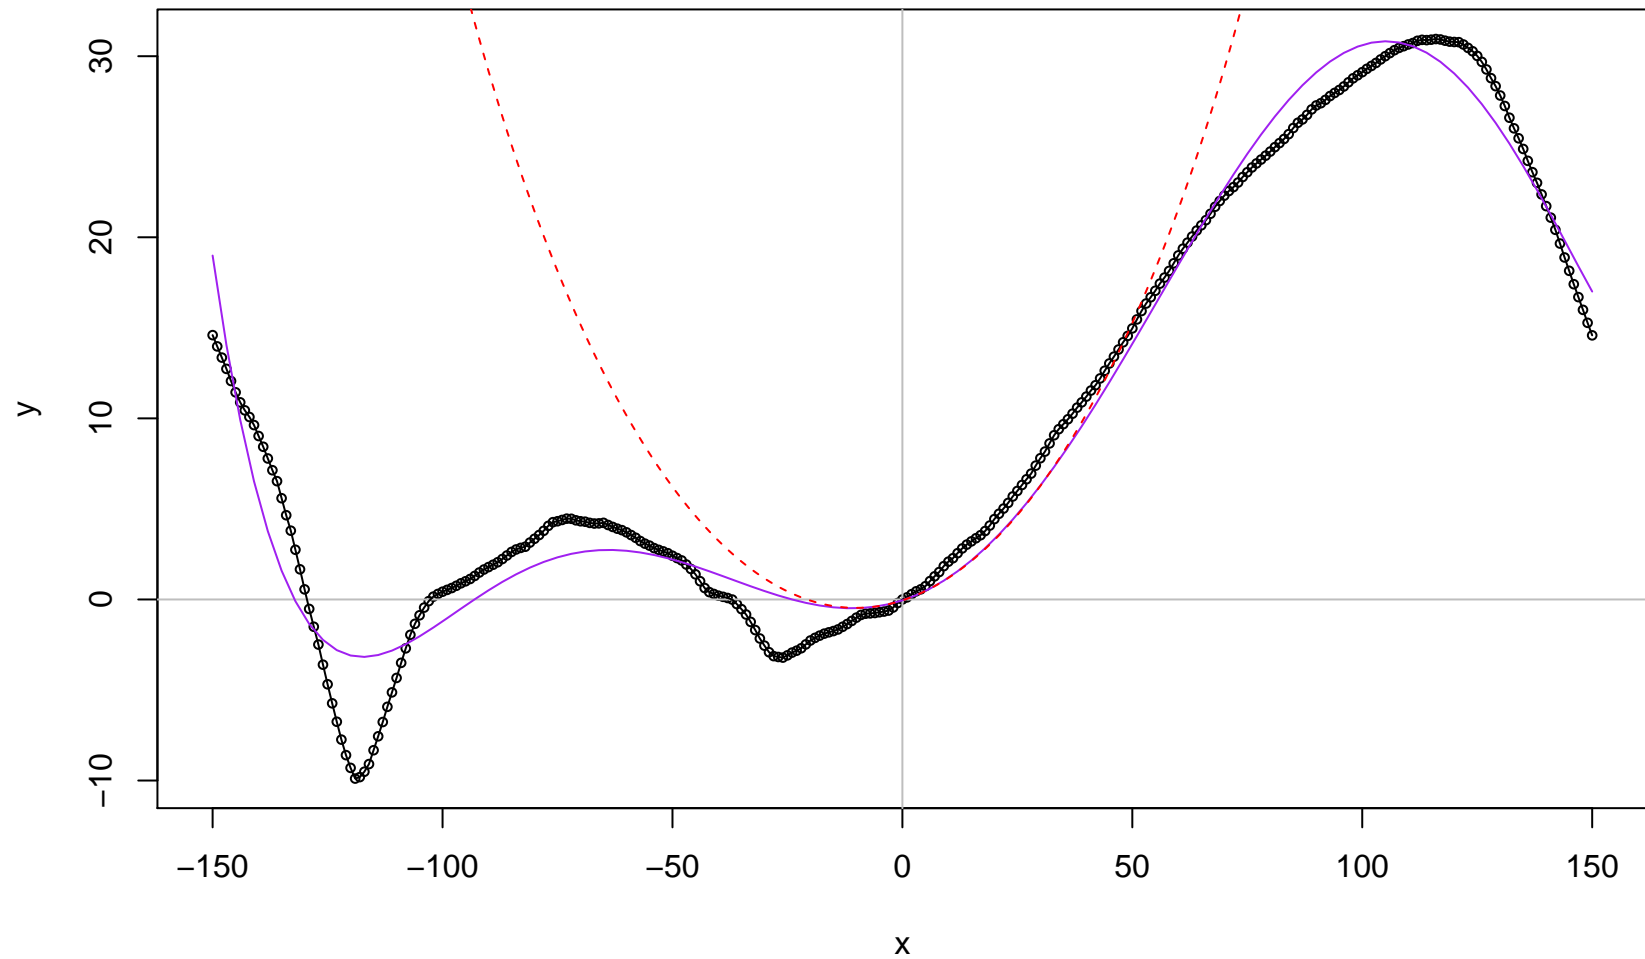

Site 84

$K \cdot 100 = 0.2182$

$R^2 = 0.9598$

radius= 458.2558

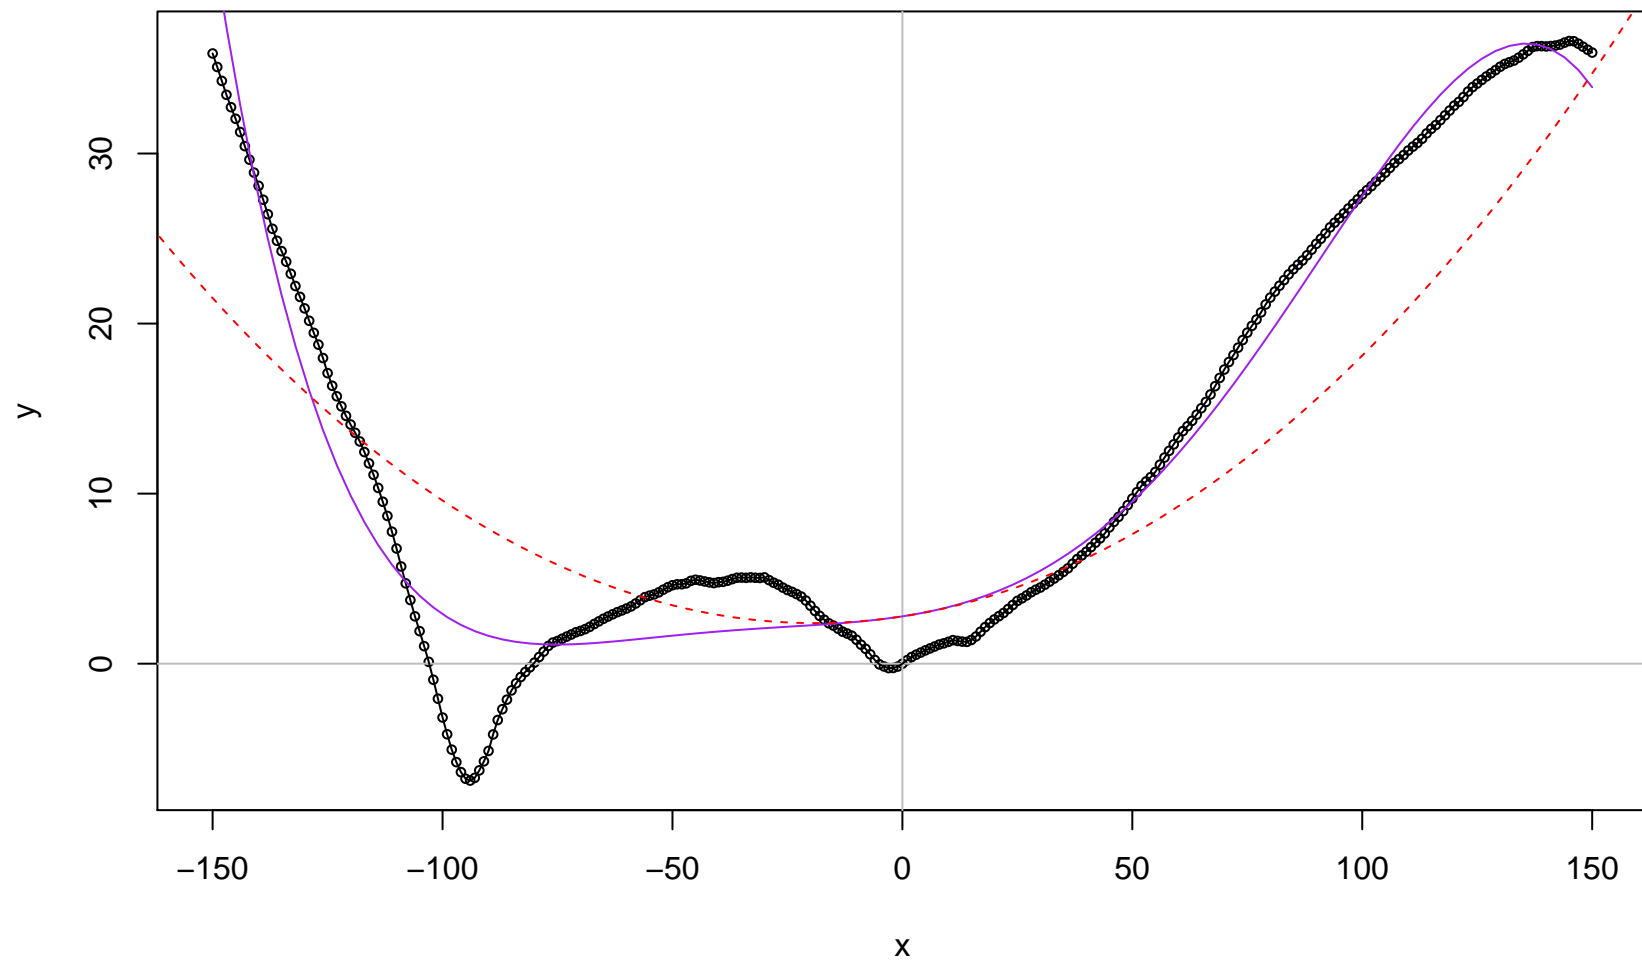

Site 85

$K \cdot 100 = 0.054$

$R^2 = 0.9692$

radius= 1850.4694

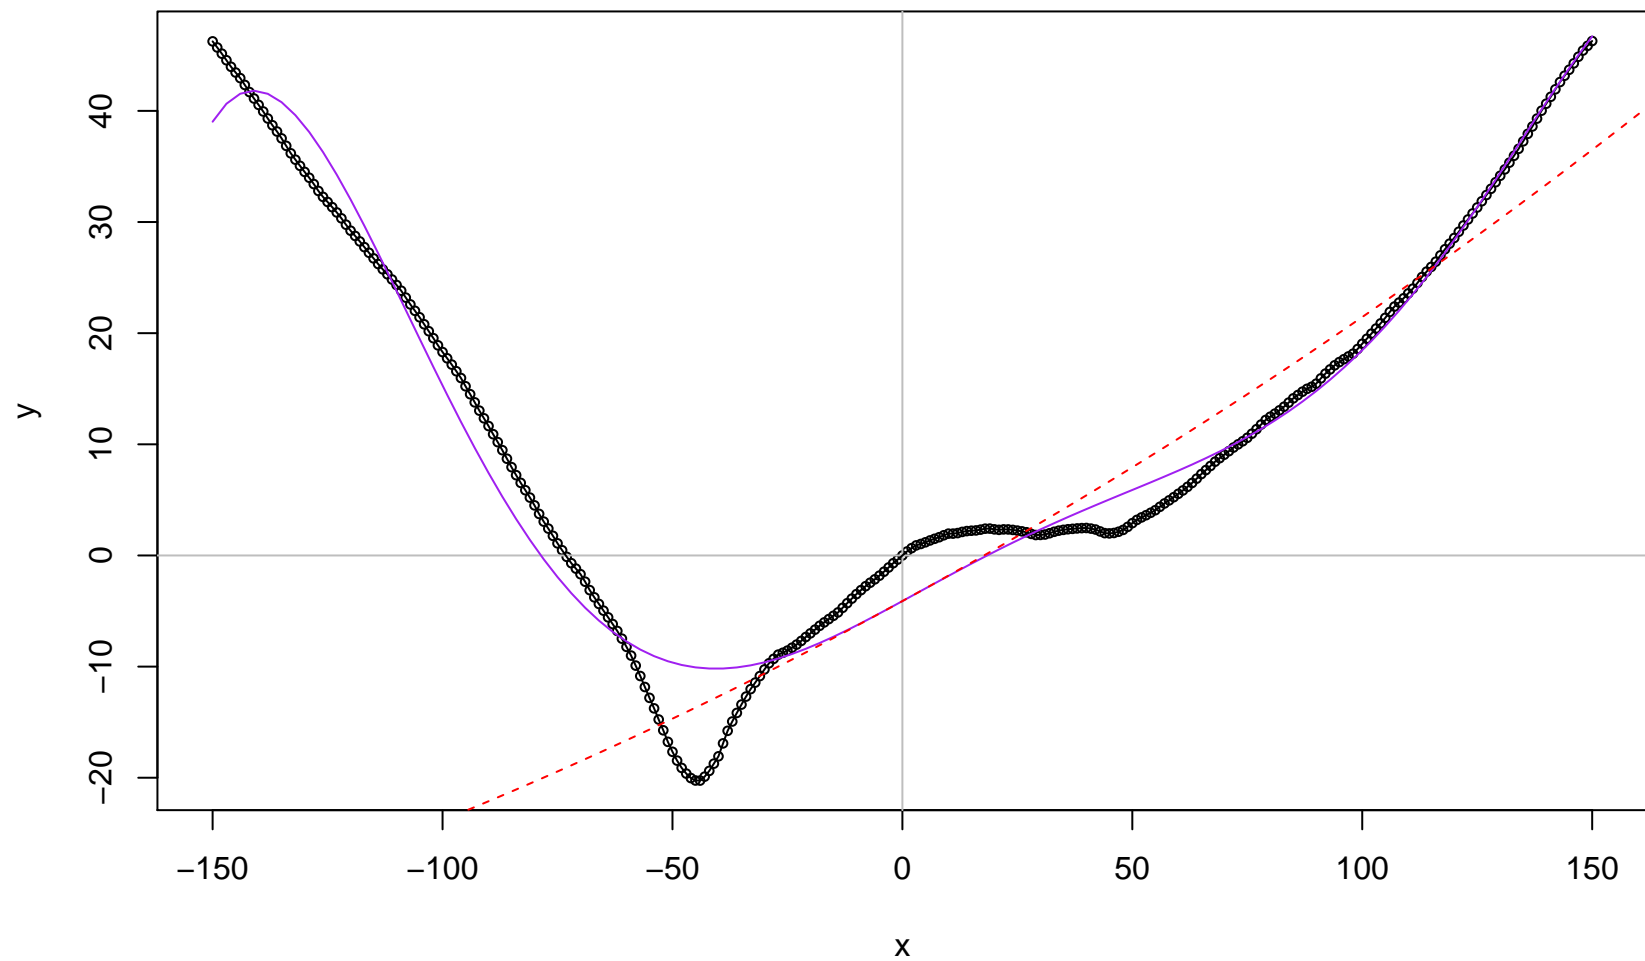

Site 86

$K \cdot 100 = 0.7755$

$R^2 = 0.991$

radius= 128.9504

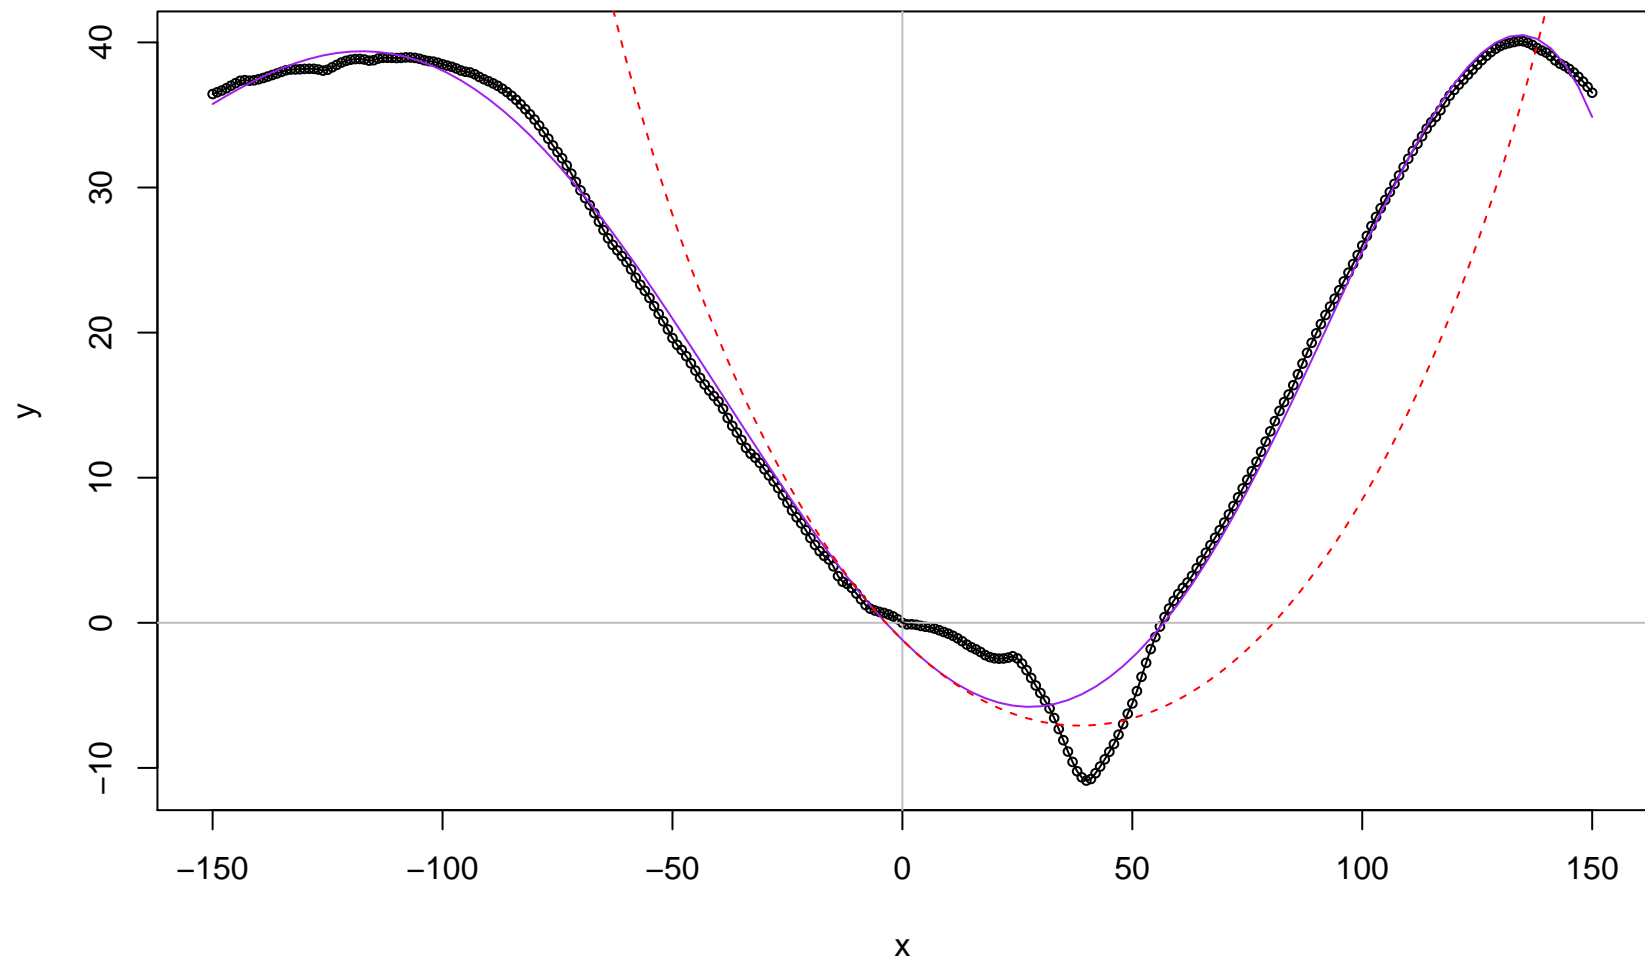

Site 87

$K \cdot 100 = -1.3456$

$R^2 = 0.9927$

radius =  $-74.3158$

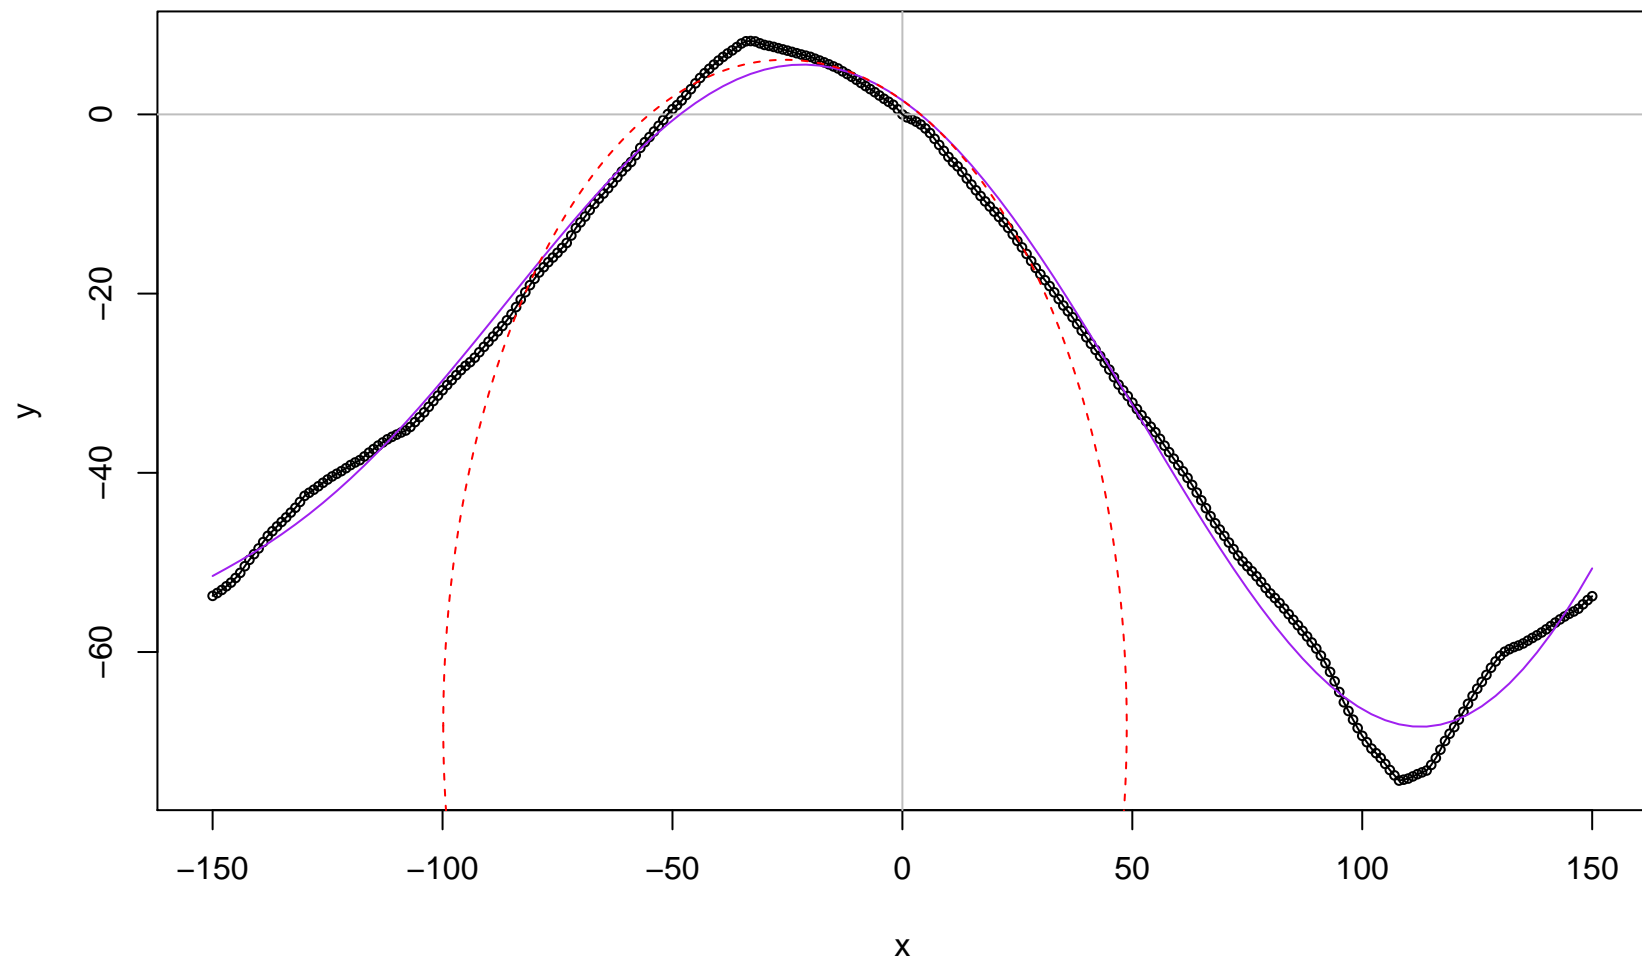

Site 88

$K*100 = -0.7637$

$R^2 = 0.9976$

radius =  $-130.938$

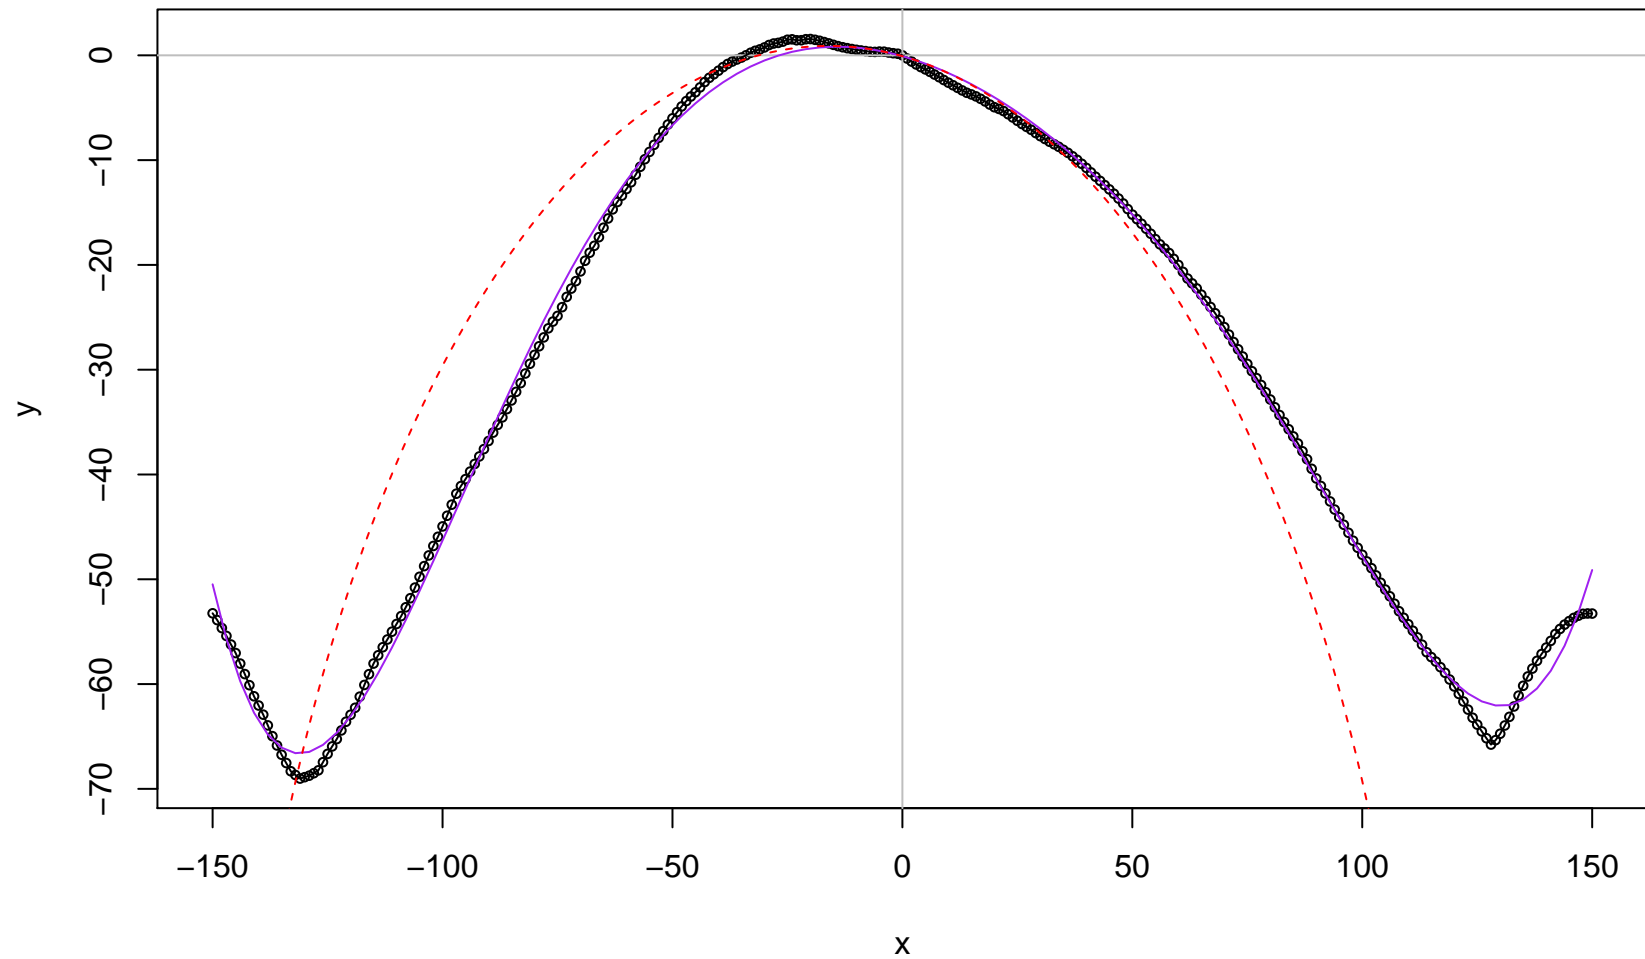



Site 89

$K \cdot 100 = 1.2196$

$R^2 = 0.979$

radius= 81.9937

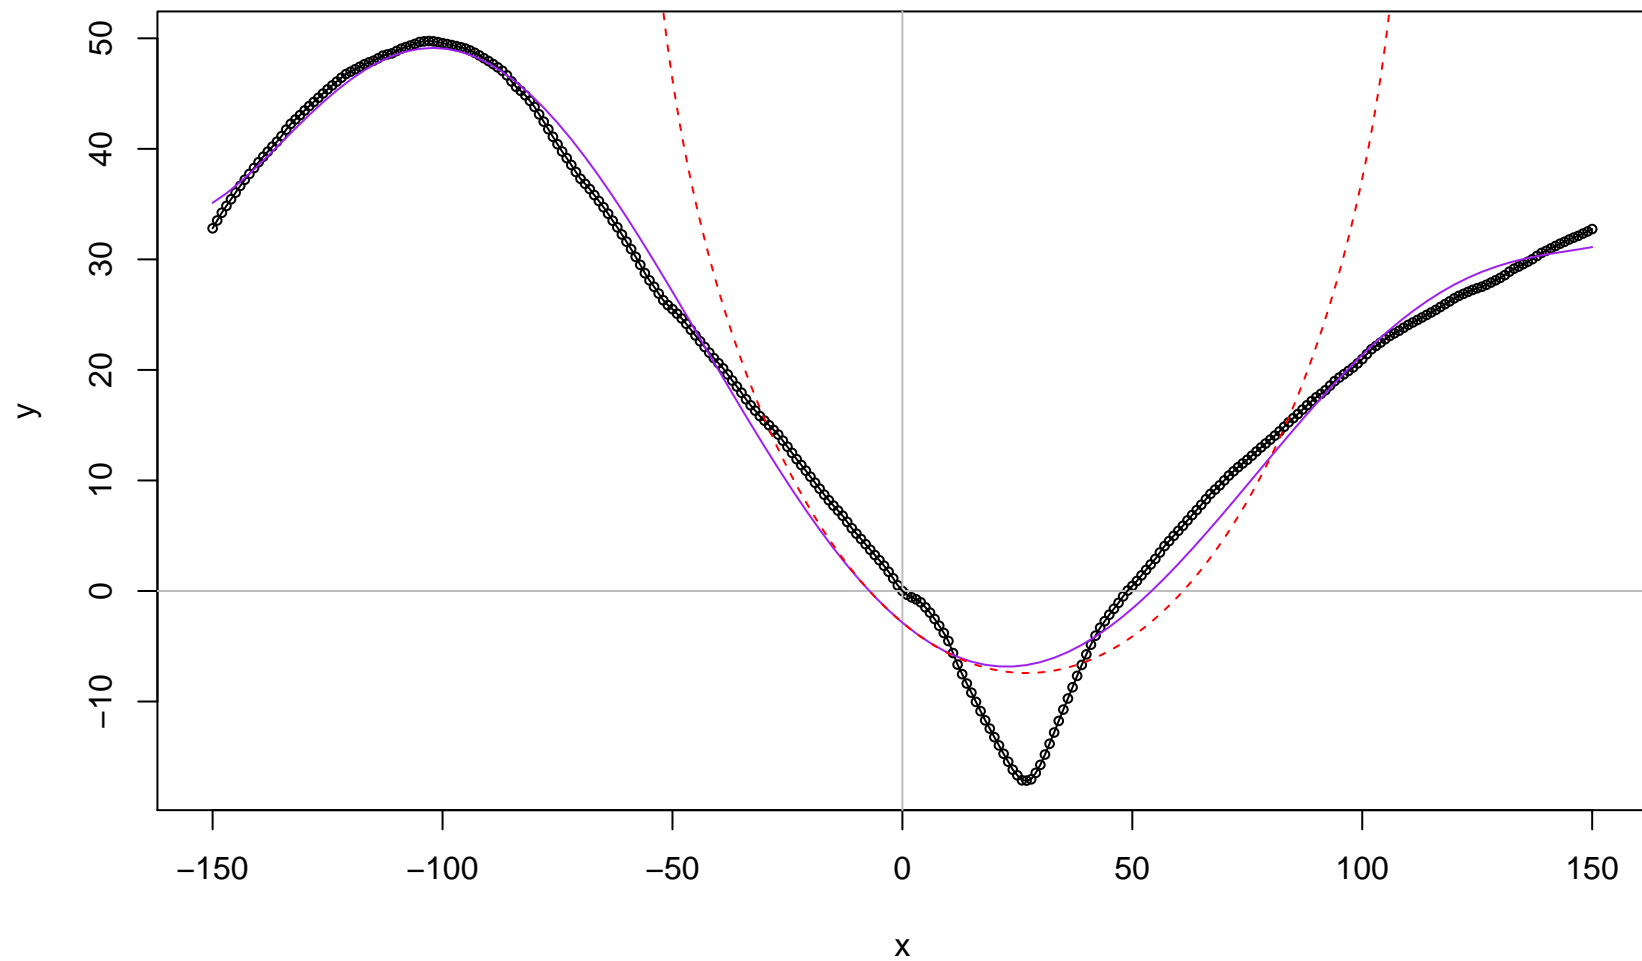

Site 90

$K*100= 1.2455$

$R^2= 0.998$

radius= 80.2869

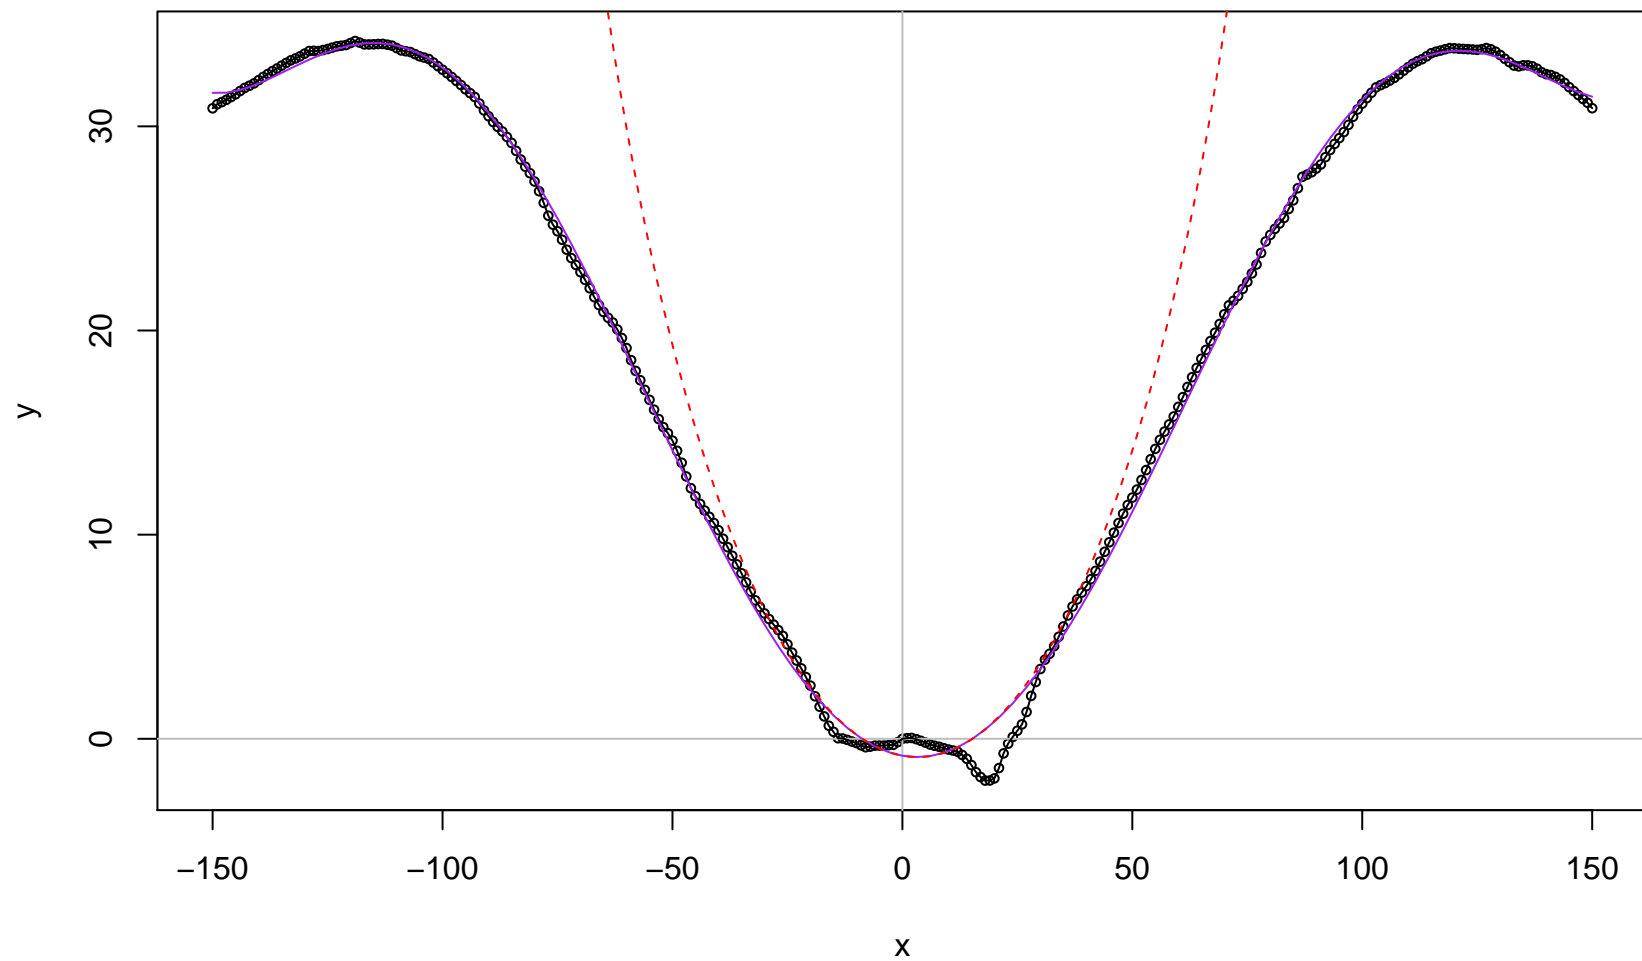

Site 91

$K*100= 0.8295$

$R^2= 0.9949$

radius= 120.5513

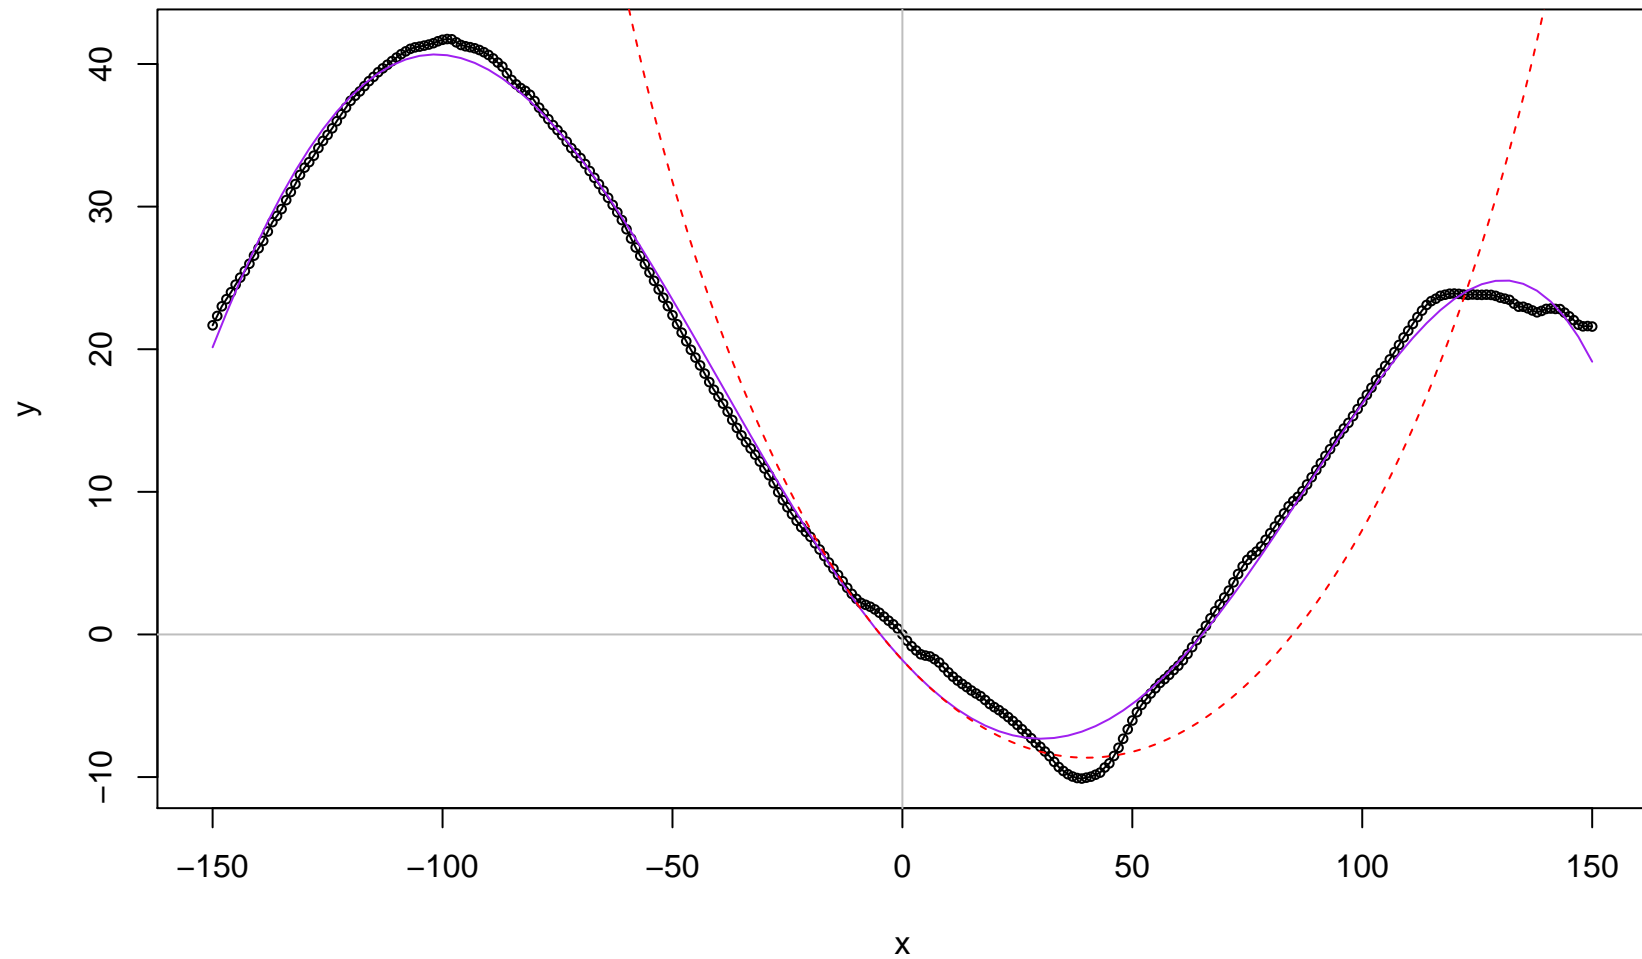

Site 92

$K \cdot 100 = 2.123$

$R^2 = 0.9953$

radius = 47.1025

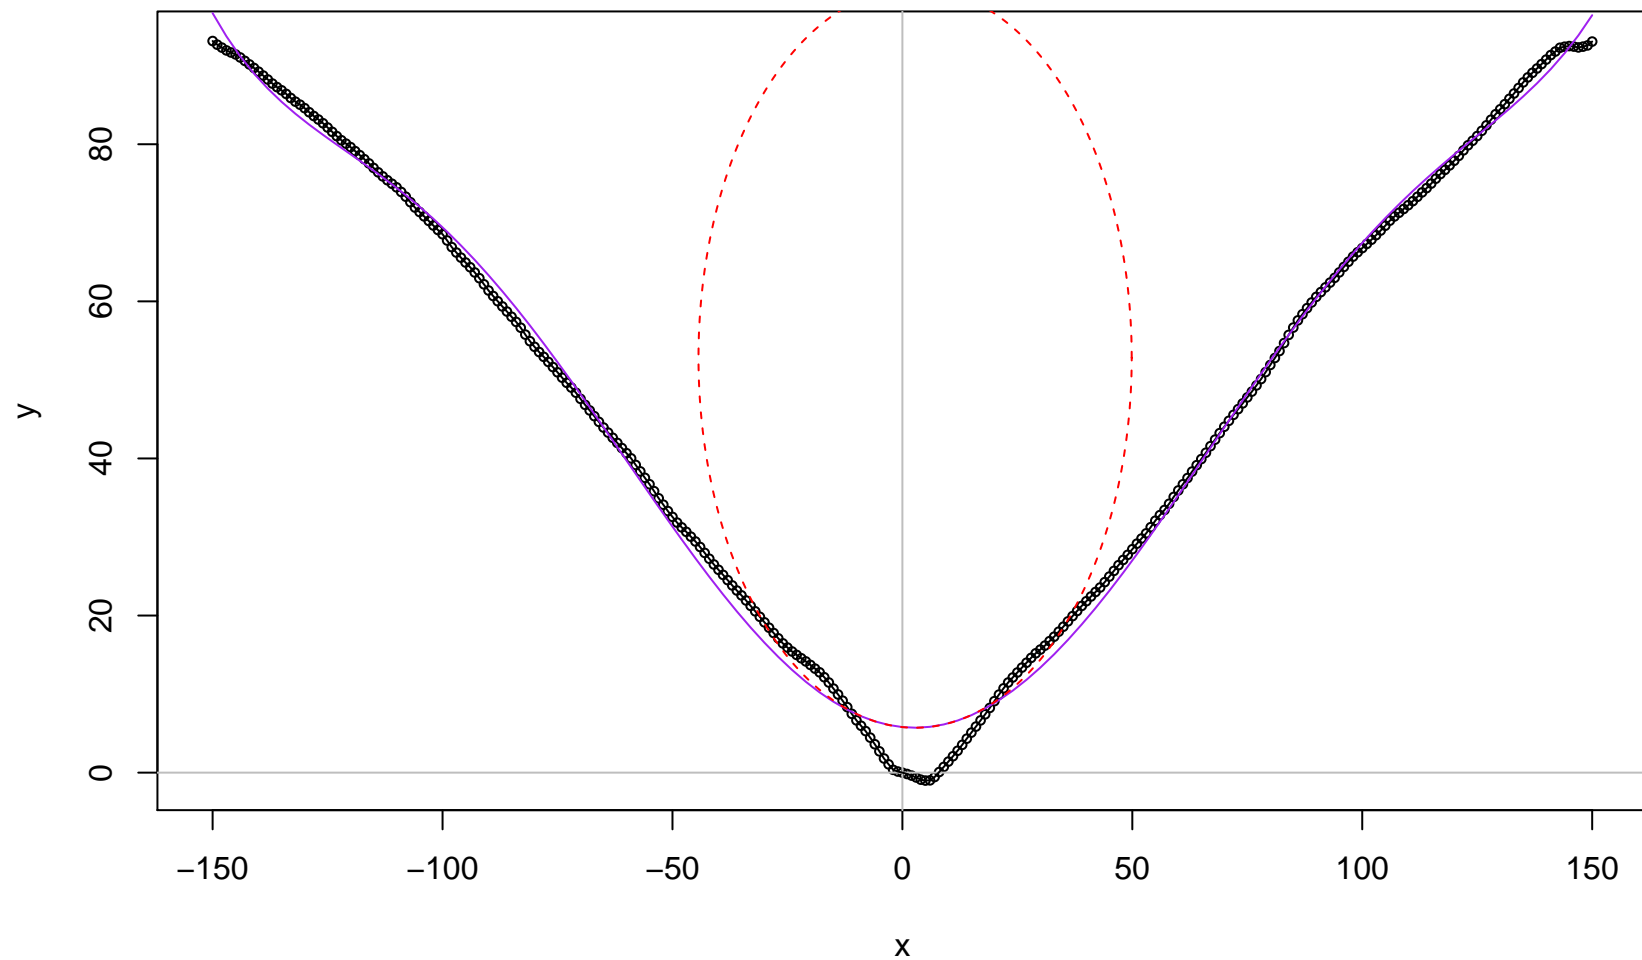

Site 93

$K \cdot 100 = 0.7825$

$R^2 = 0.9888$

radius = 127.7995

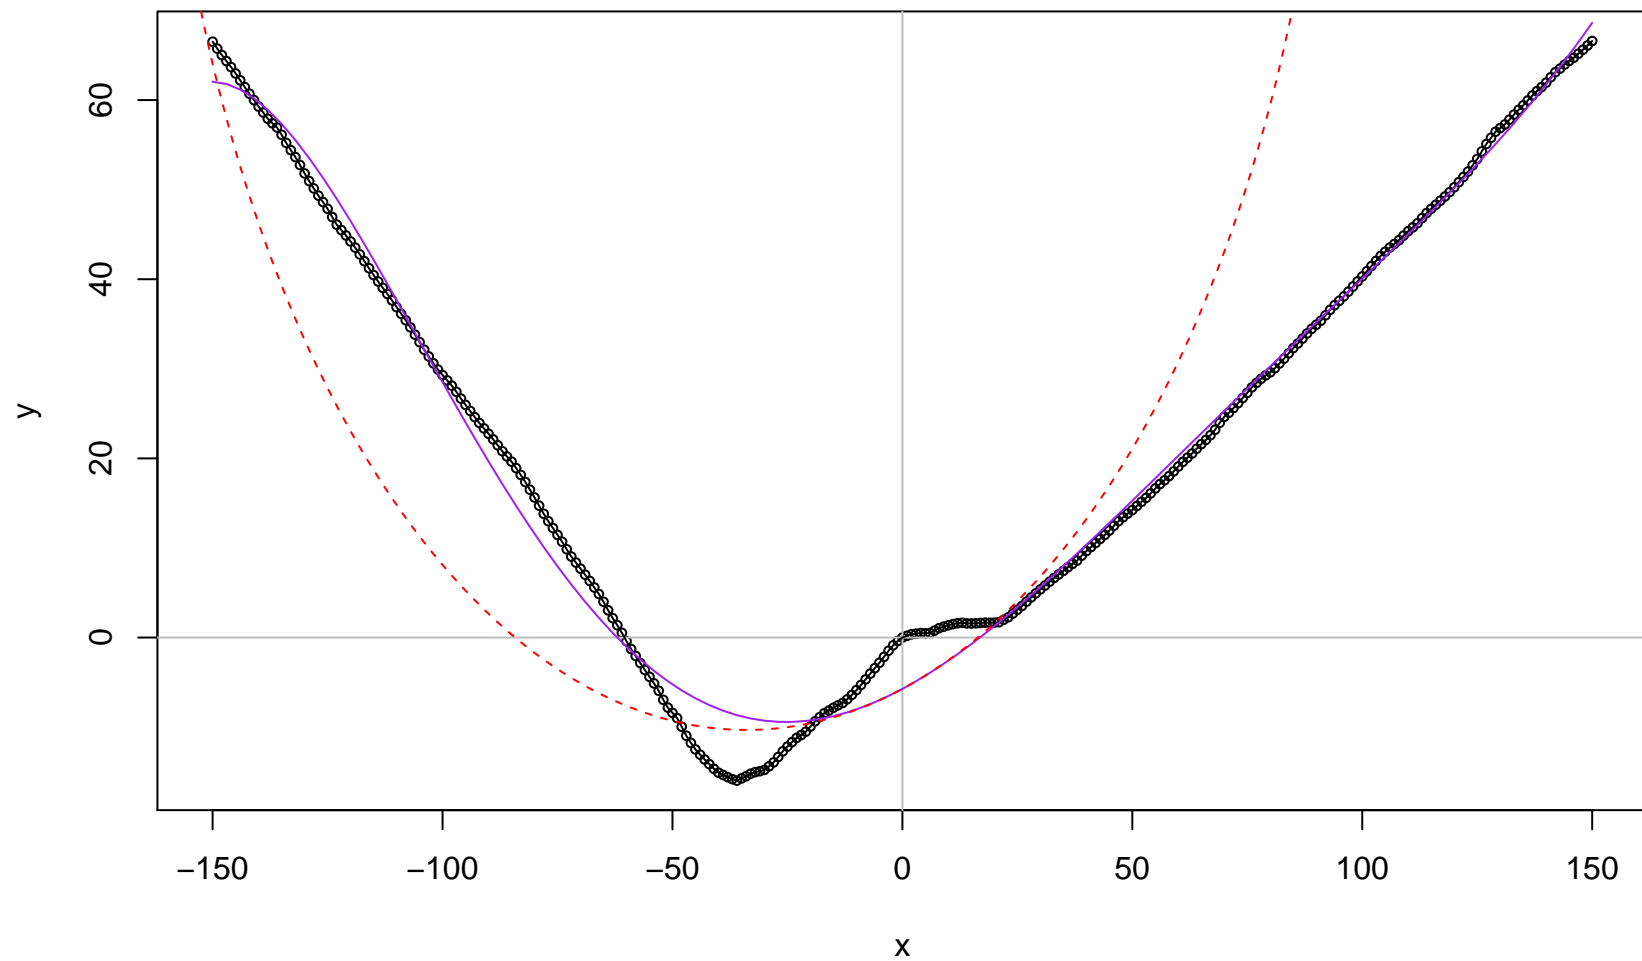

Site 94

$K \cdot 100 = 0.4292$

$R^2 = 0.9724$

radius = 233.0142

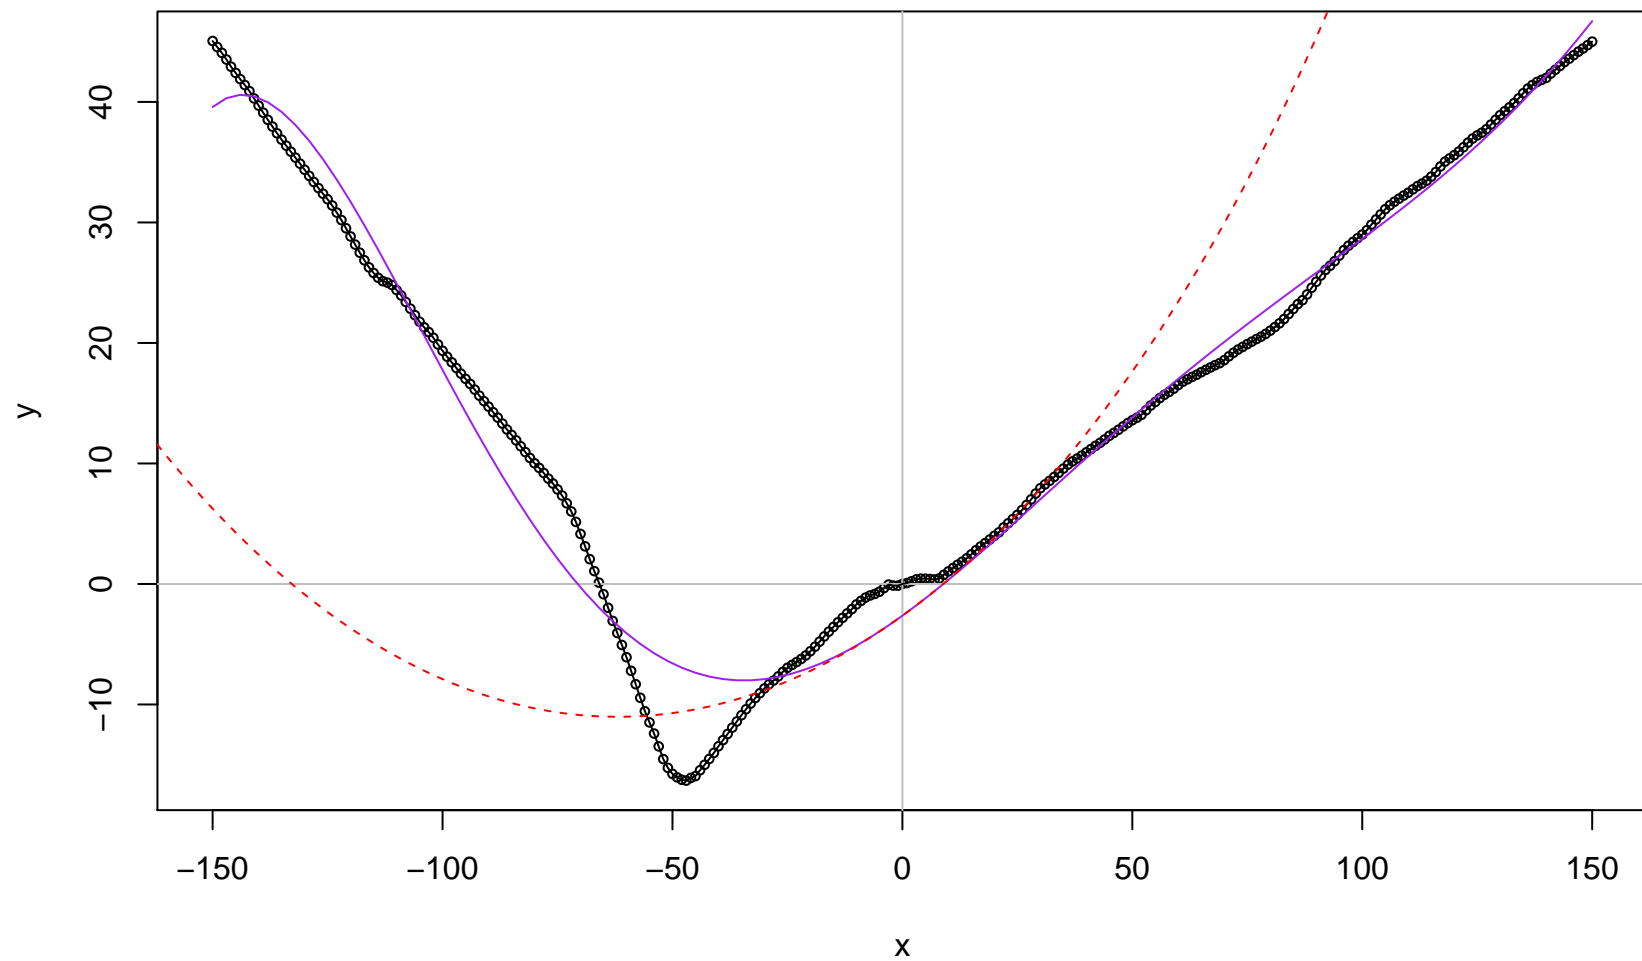

Site 95

$K*100= 1.2986$

$R^2= 0.9789$

radius= 77.0052

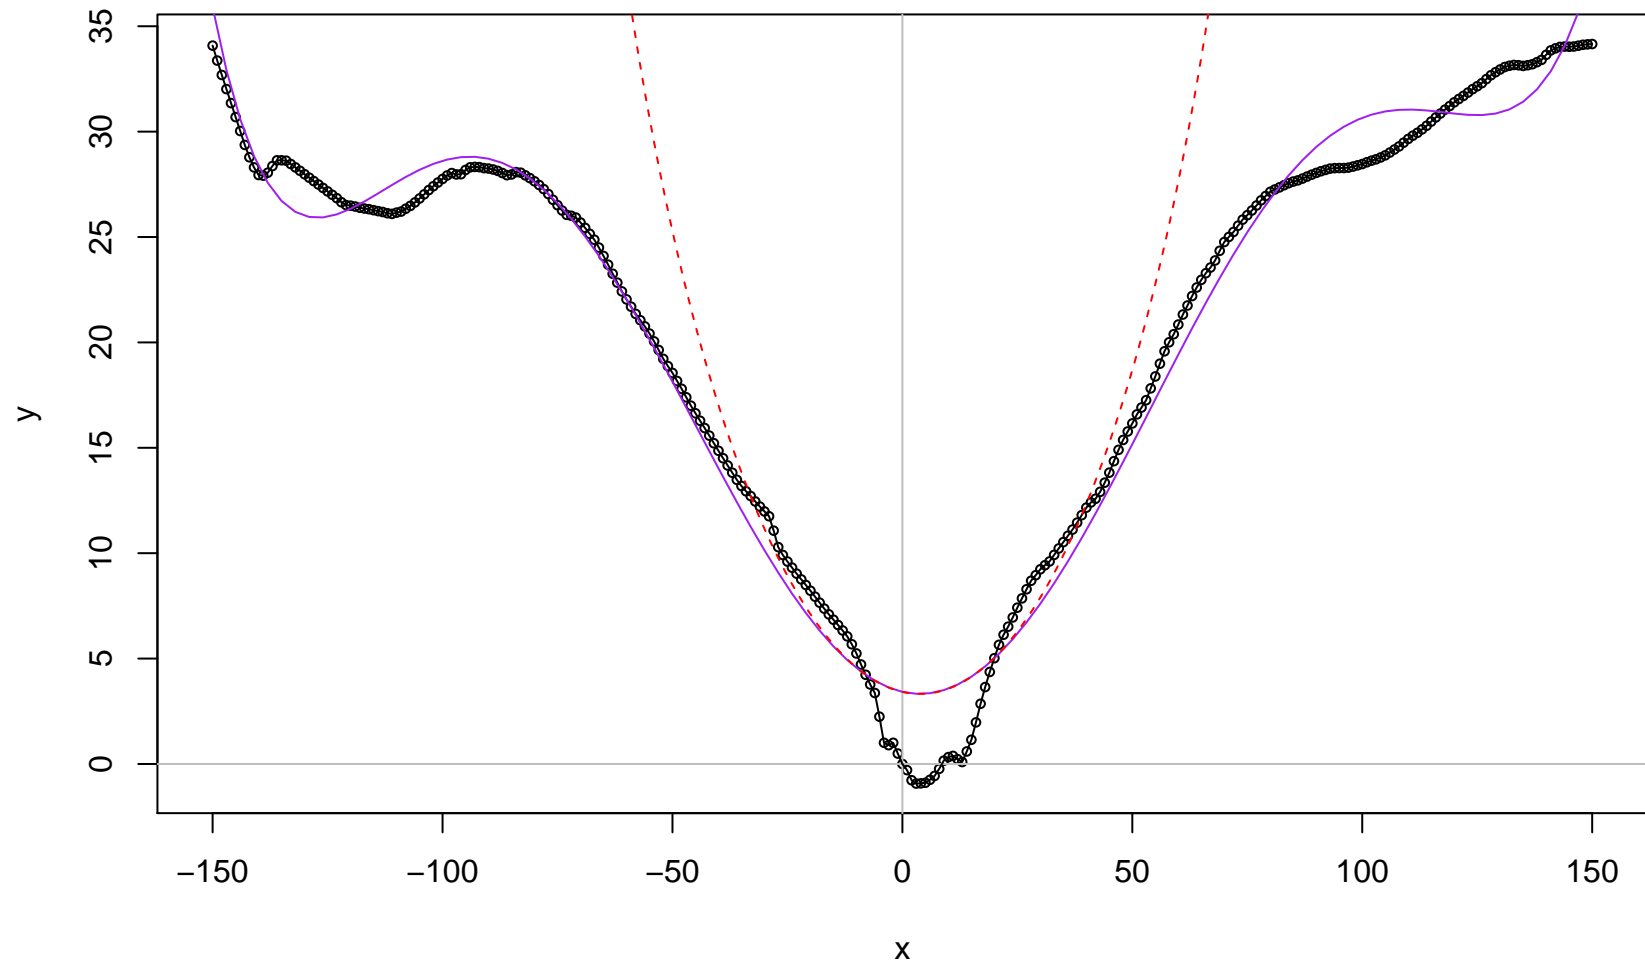

Site 96

$K \cdot 100 = 0.5436$

$R^2 = 0.9811$

radius = 183.9617

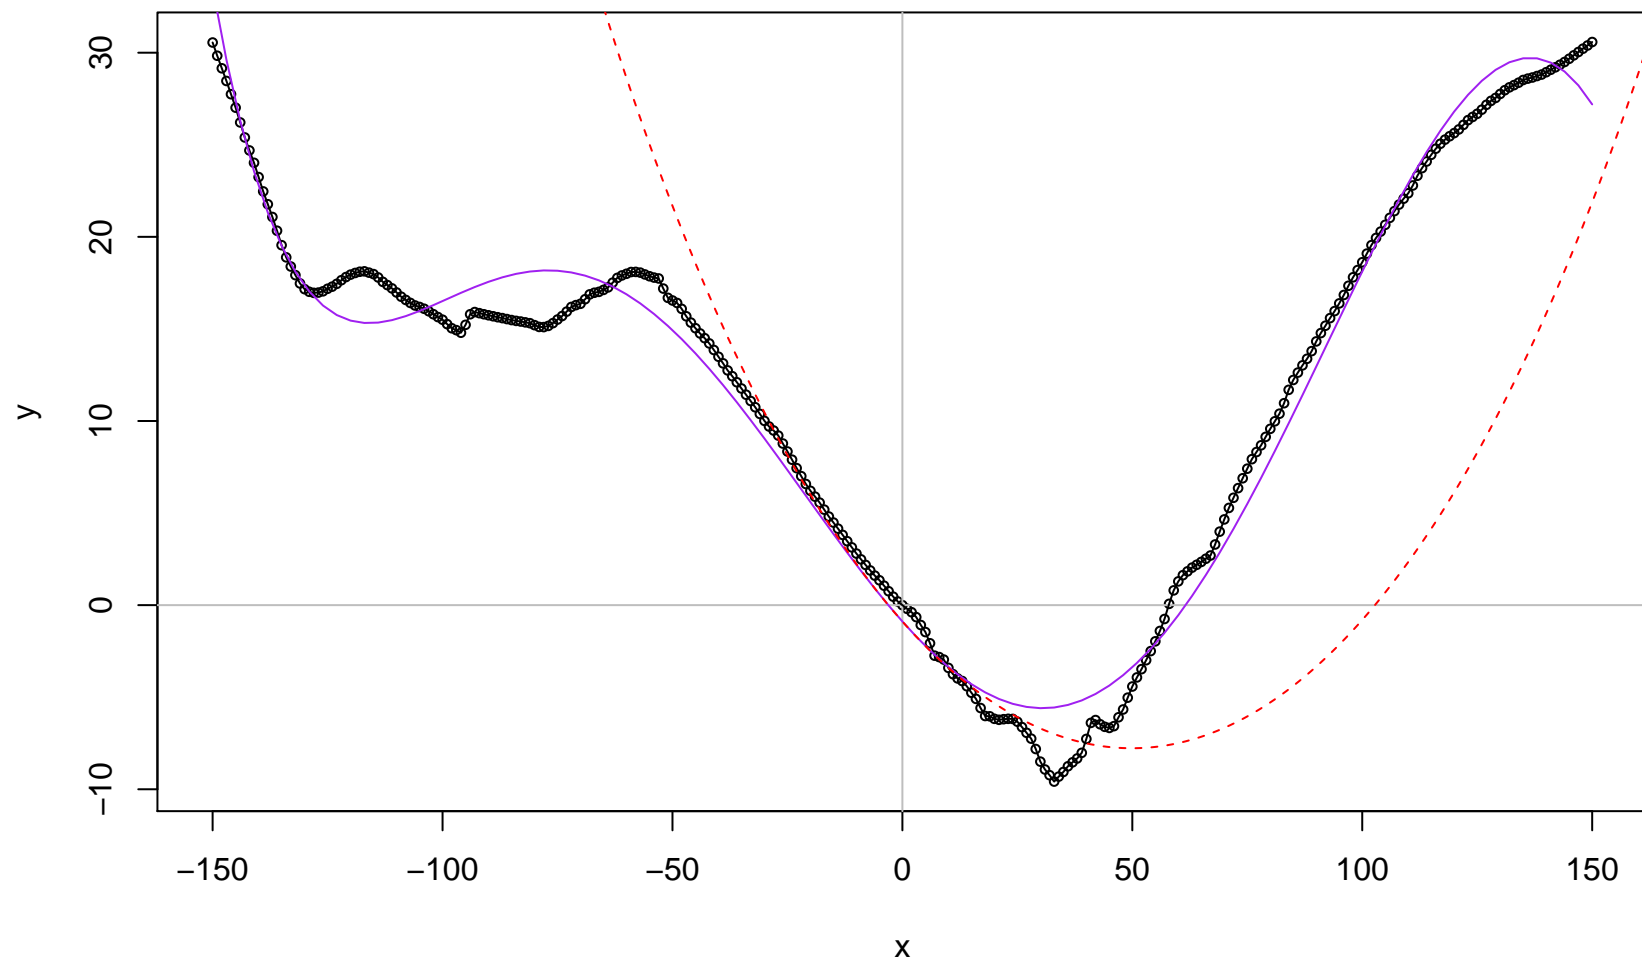



Site 97

$K*100= 0.5192$

$R^2= 0.9783$

radius= 192.6047

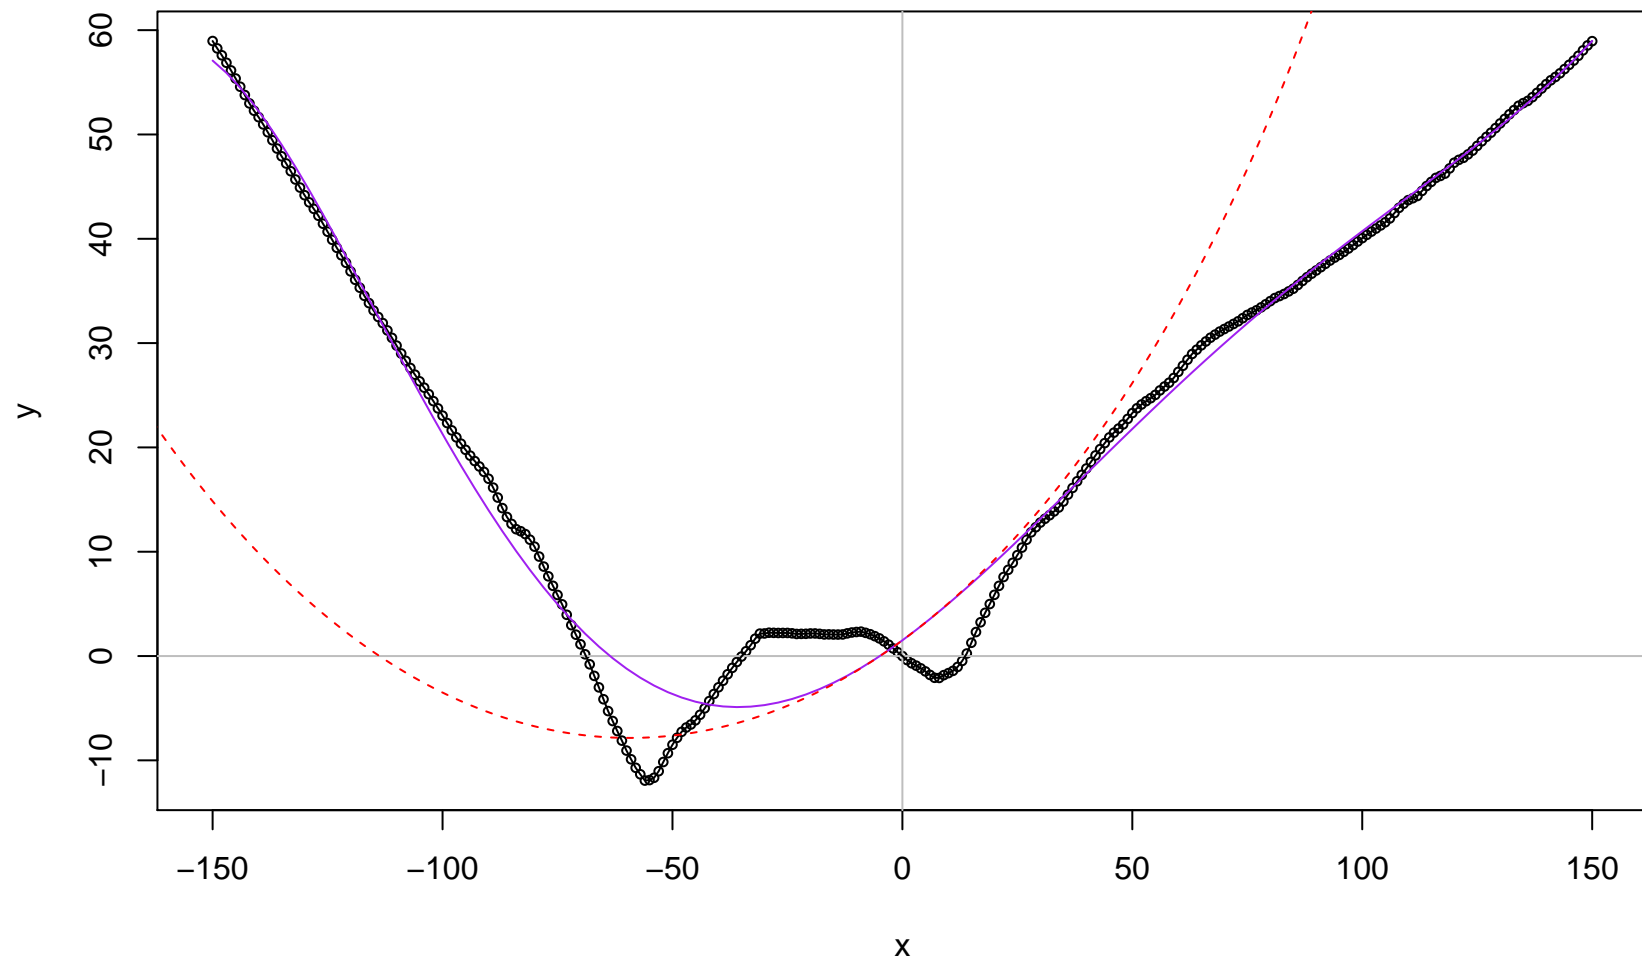

Site 98

$K*100= 0.2099$

$R^2= 0.9474$

radius= 476.5119

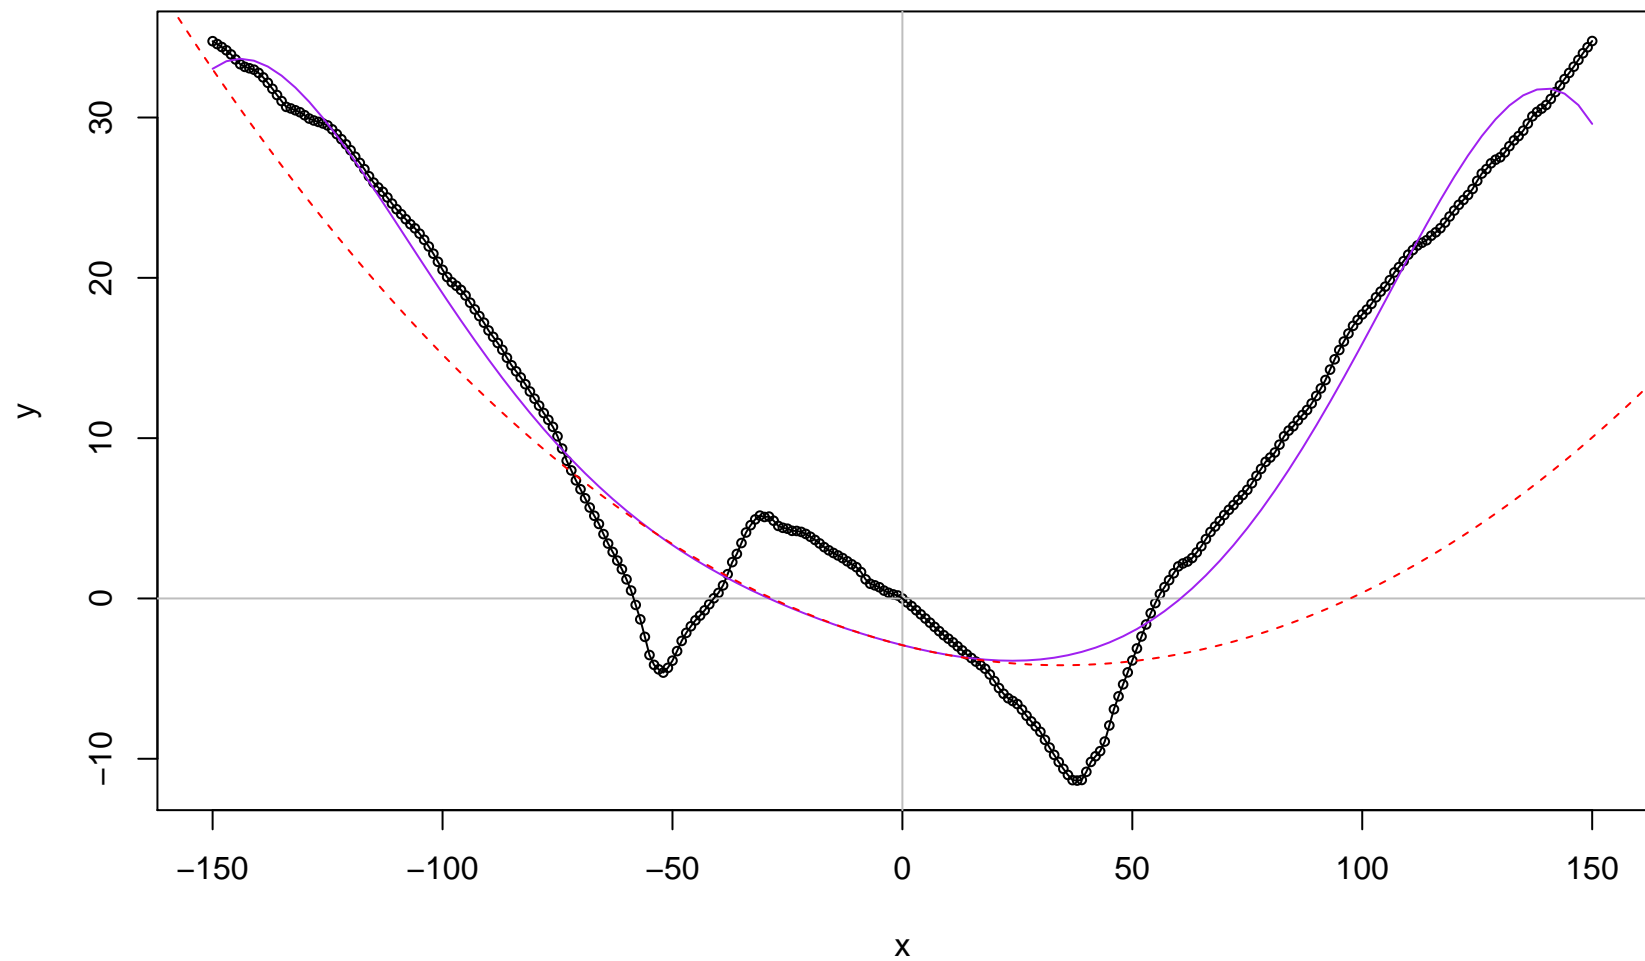

Site 99

$K*100= 1.3233$

$R^2= 0.9812$

radius= 75.5707

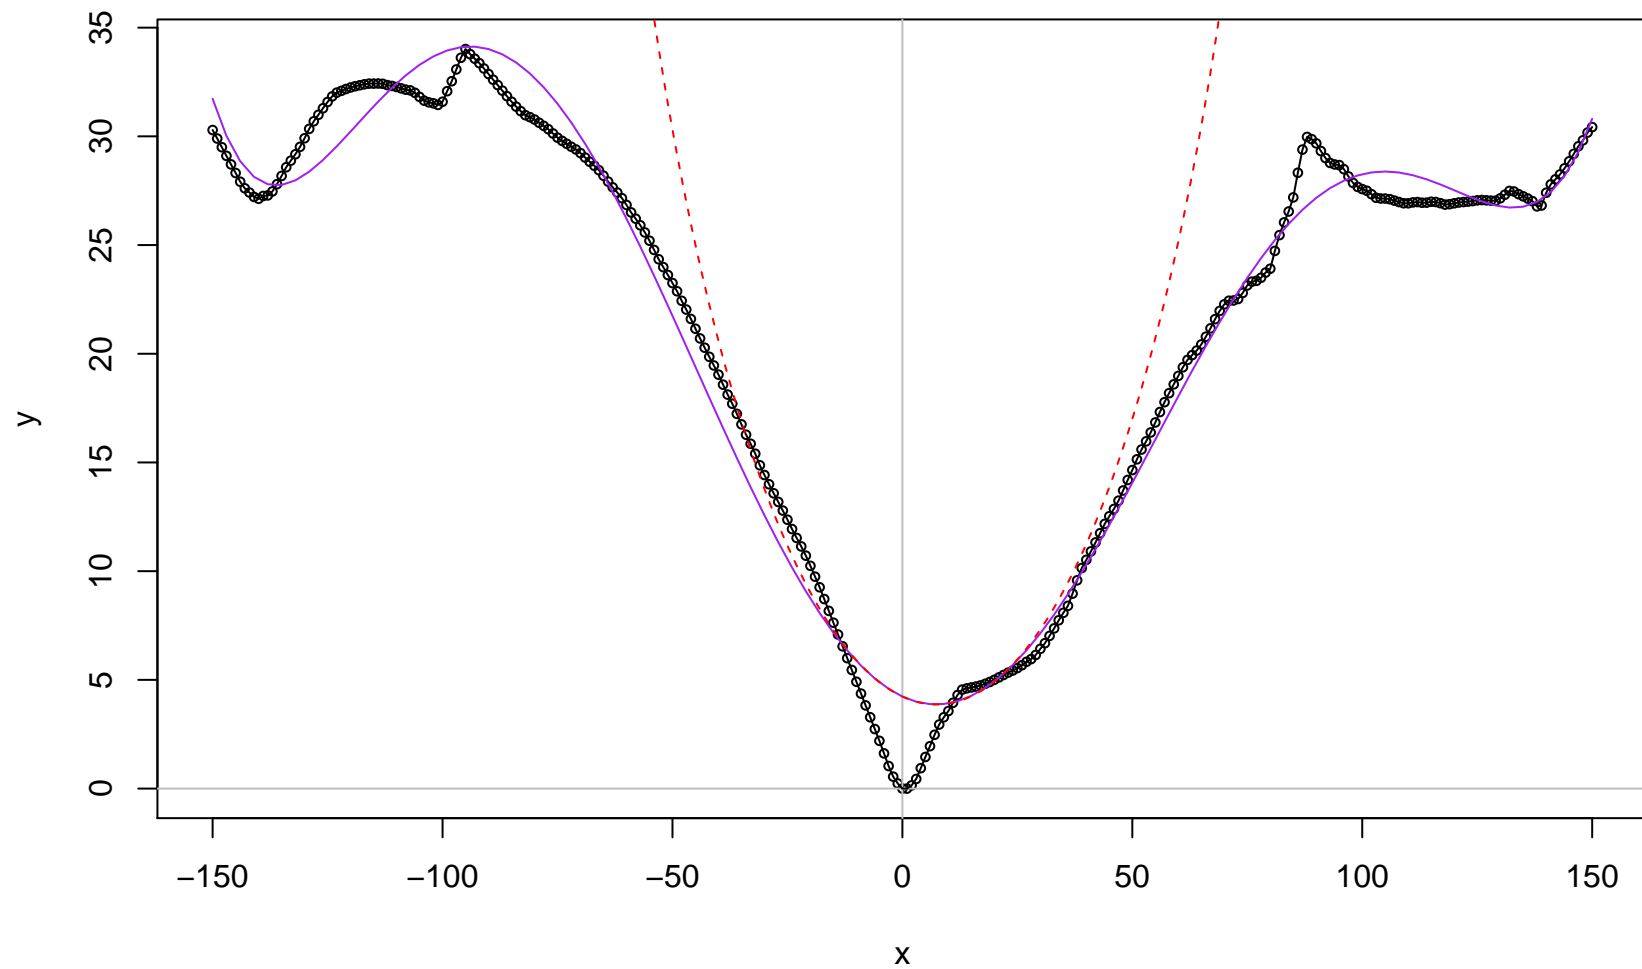

Site 100

$K*100= 1.5174$

$R^2= 0.9881$

radius= 65.9003

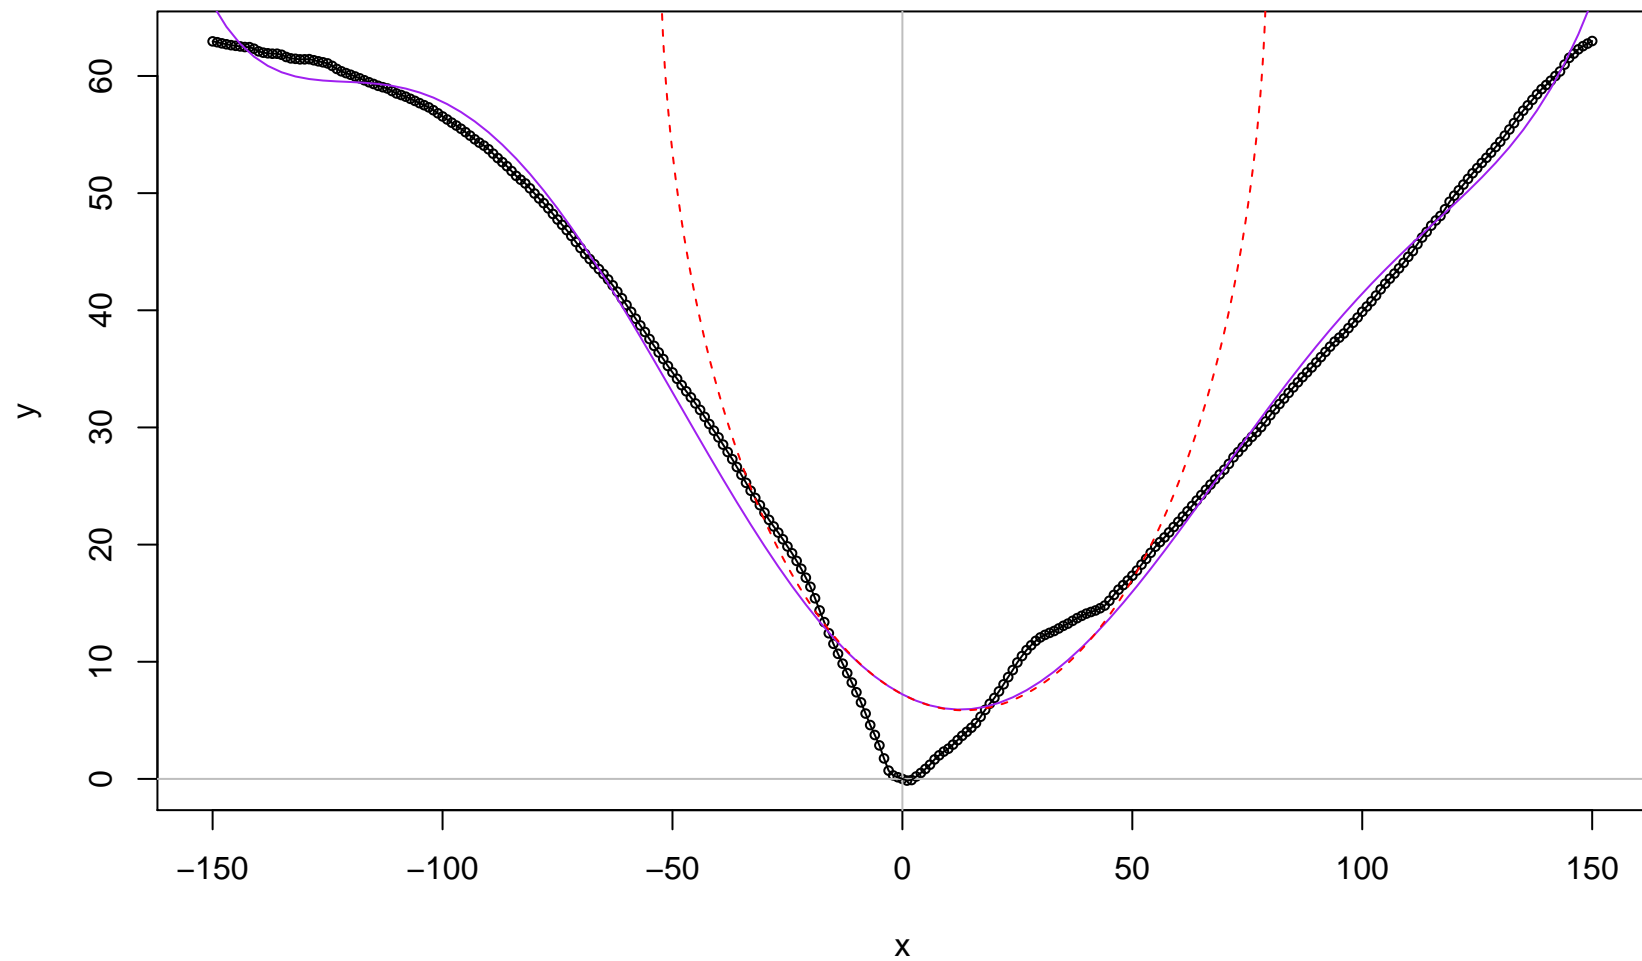

Site 101

$K*100= 0.9447$

$R^2= 0.9821$

radius= 105.856

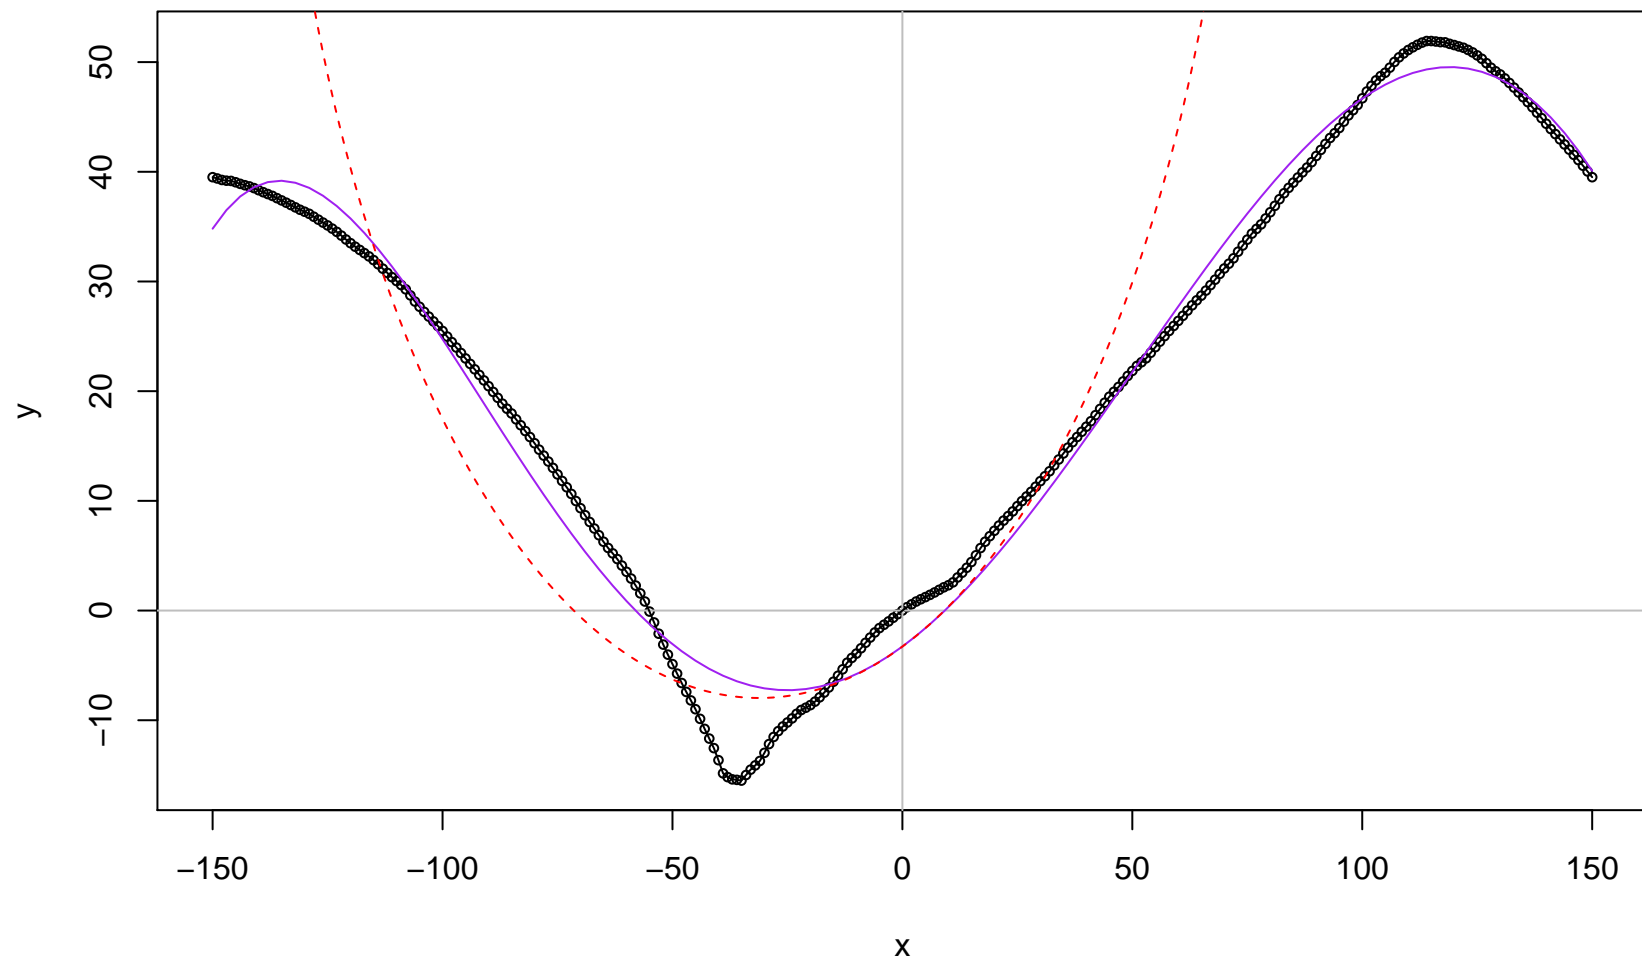

**Site 102**

**$K \cdot 100 = 0.9104$**

**$R^2 = 0.9694$**

**radius= 109.8456**

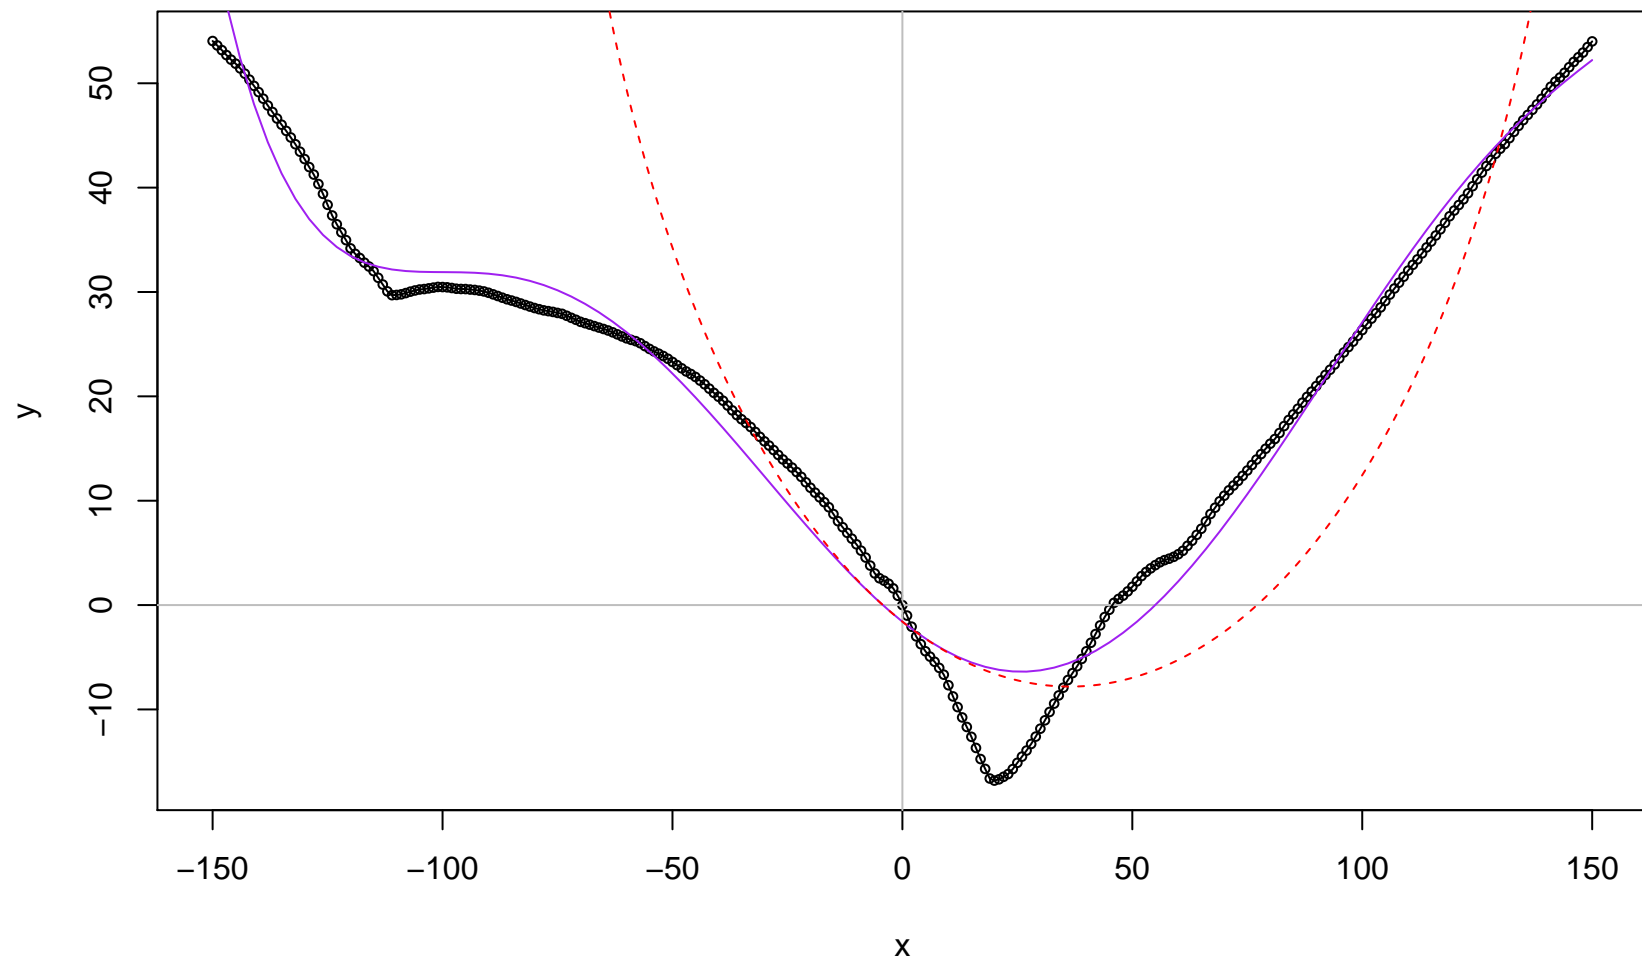

Site 103

$K \cdot 100 = -1.261$

$R^2 = 0.9966$

radius =  $-79.3049$

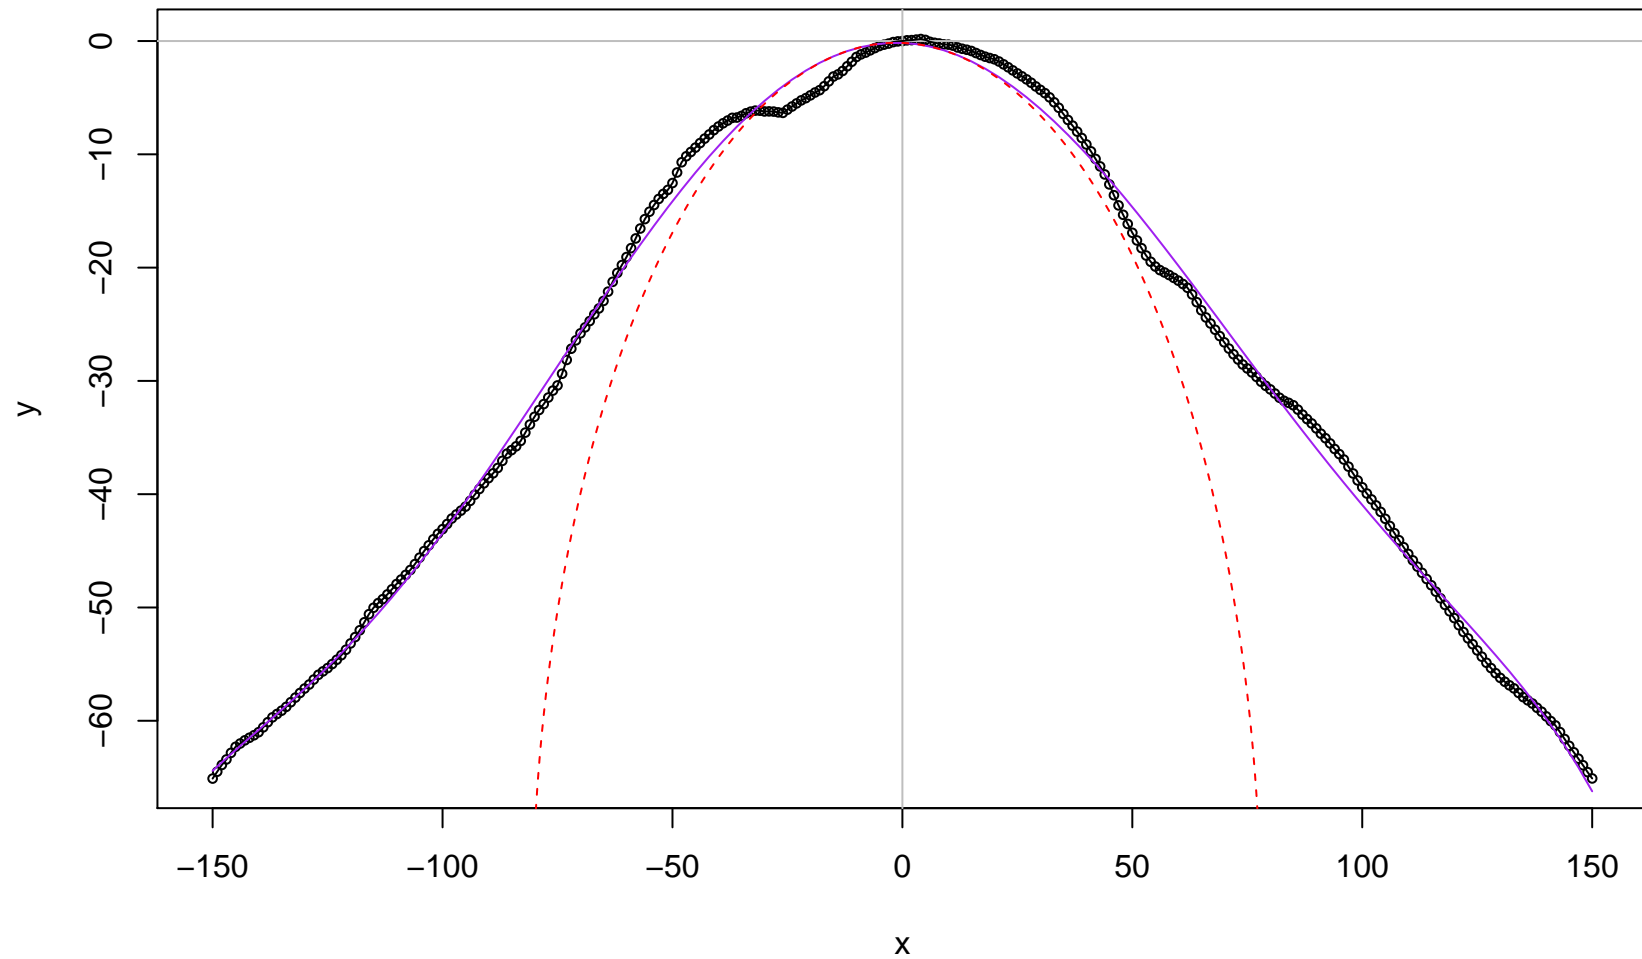

Site 104

$K*100= 0.8237$

$R^2= 0.9902$

radius= 121.3999

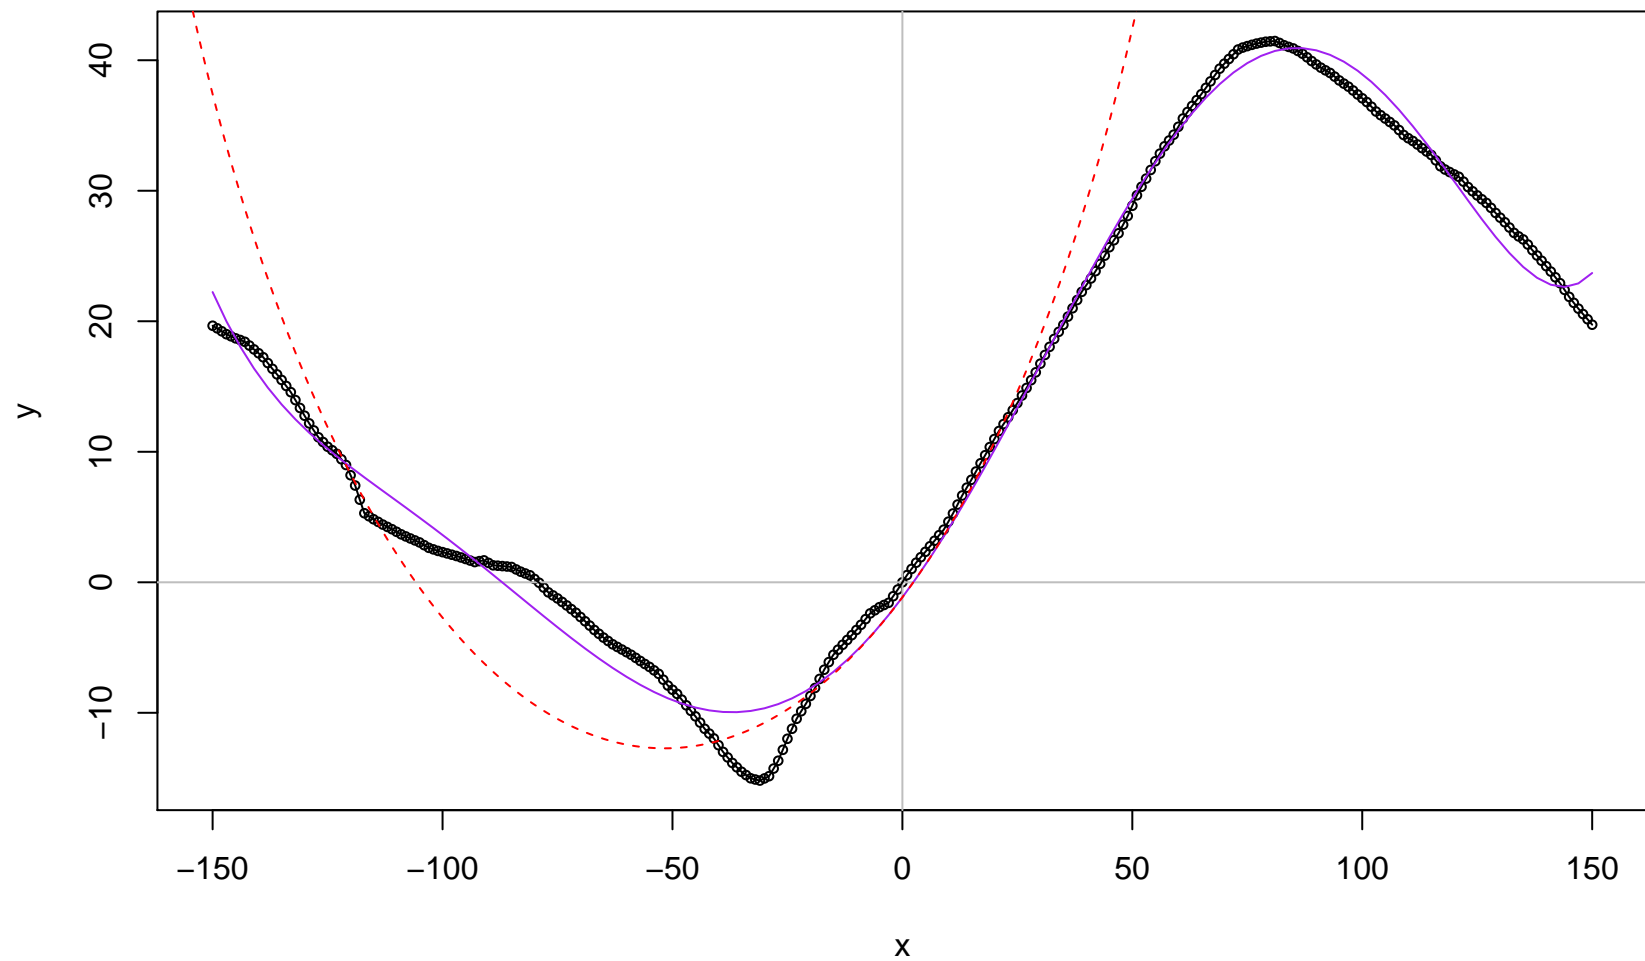



Site 105

$K*100 = -0.3899$

$R^2 = 0.9846$

radius =  $-256.4651$

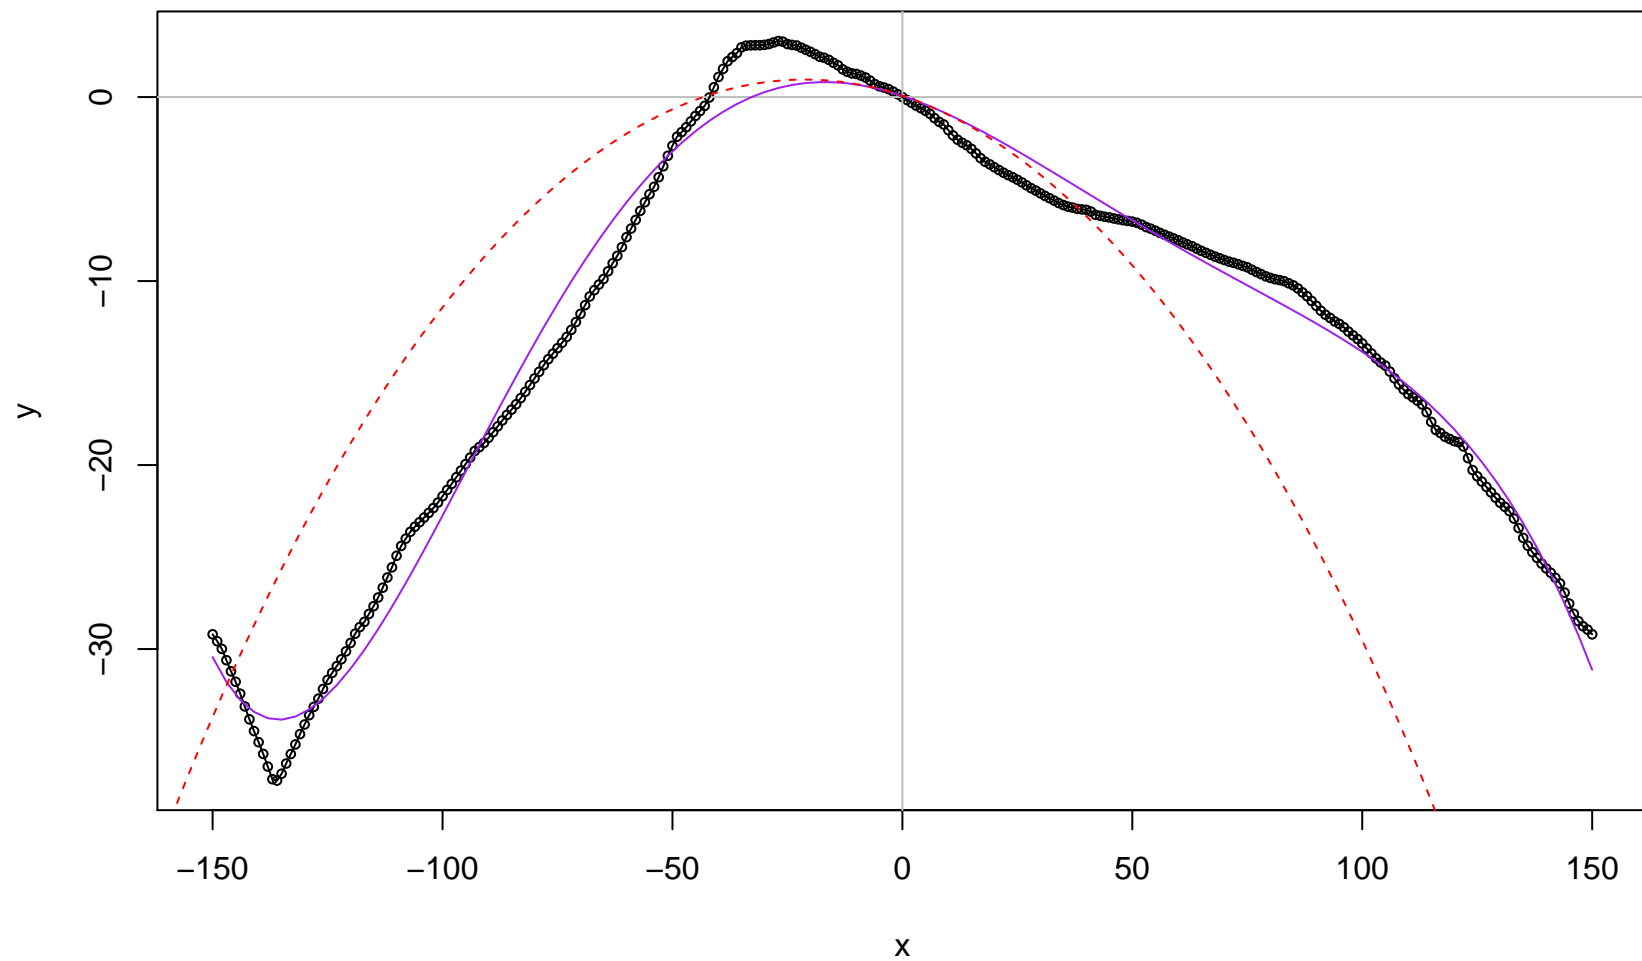

Site 106

$K \cdot 100 = 0.0954$

$R^2 = 0.9353$

radius= 1047.8344

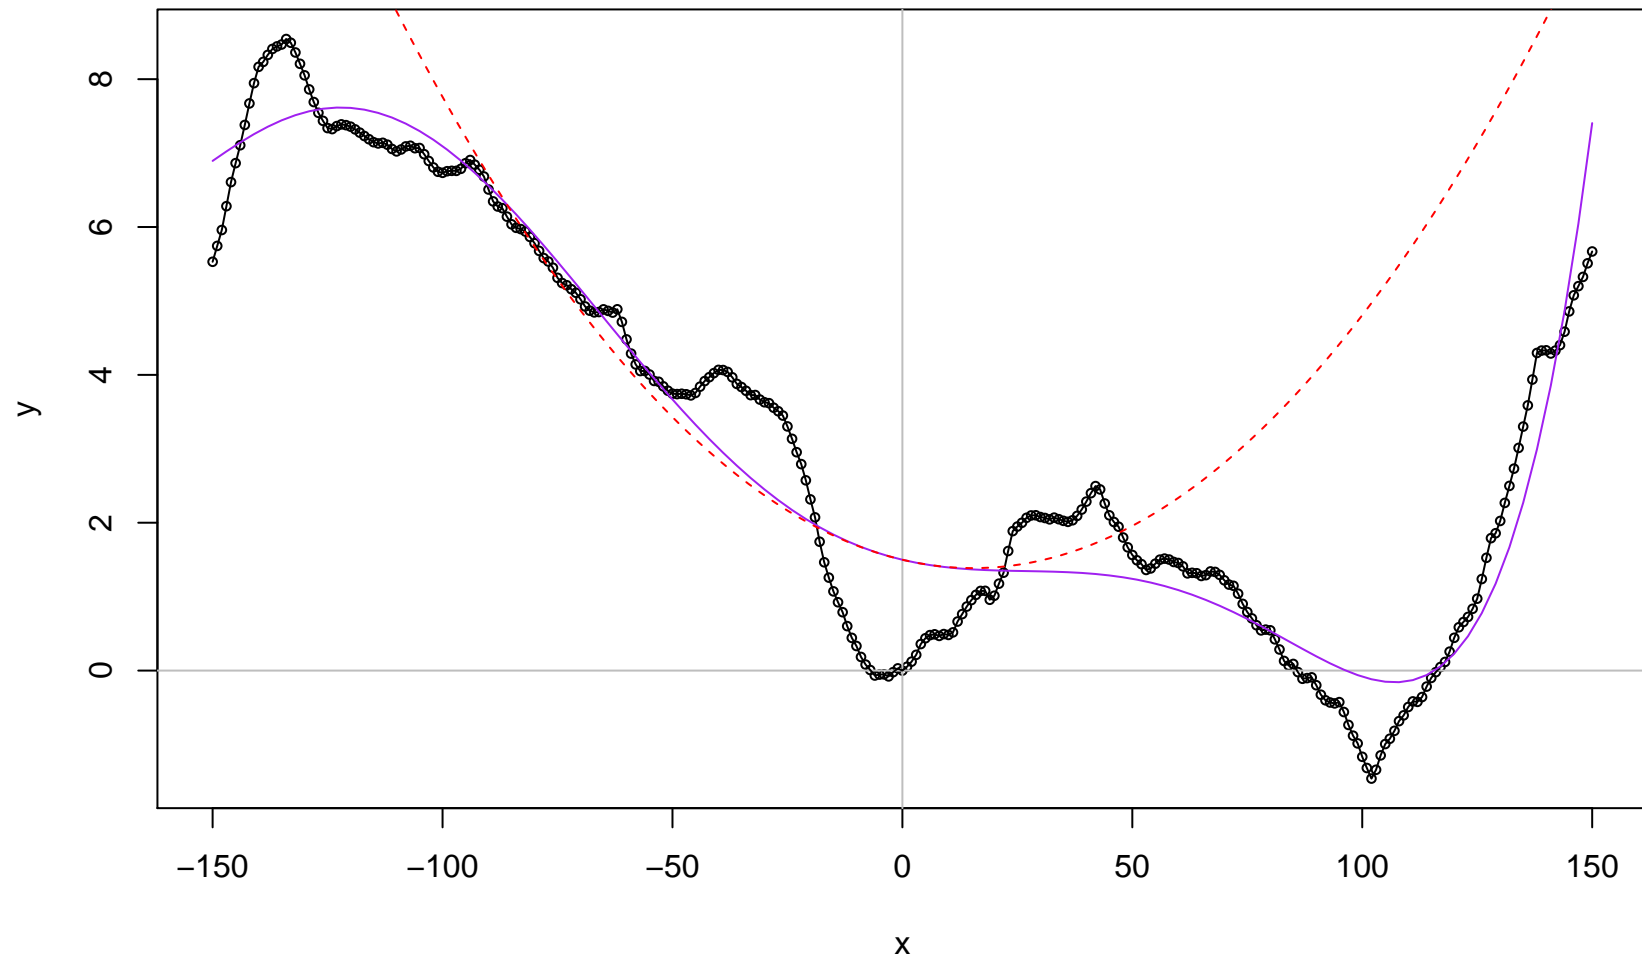

Site 107

$K*100= 0.2816$

$R^2= 0.964$

radius= 355.1191

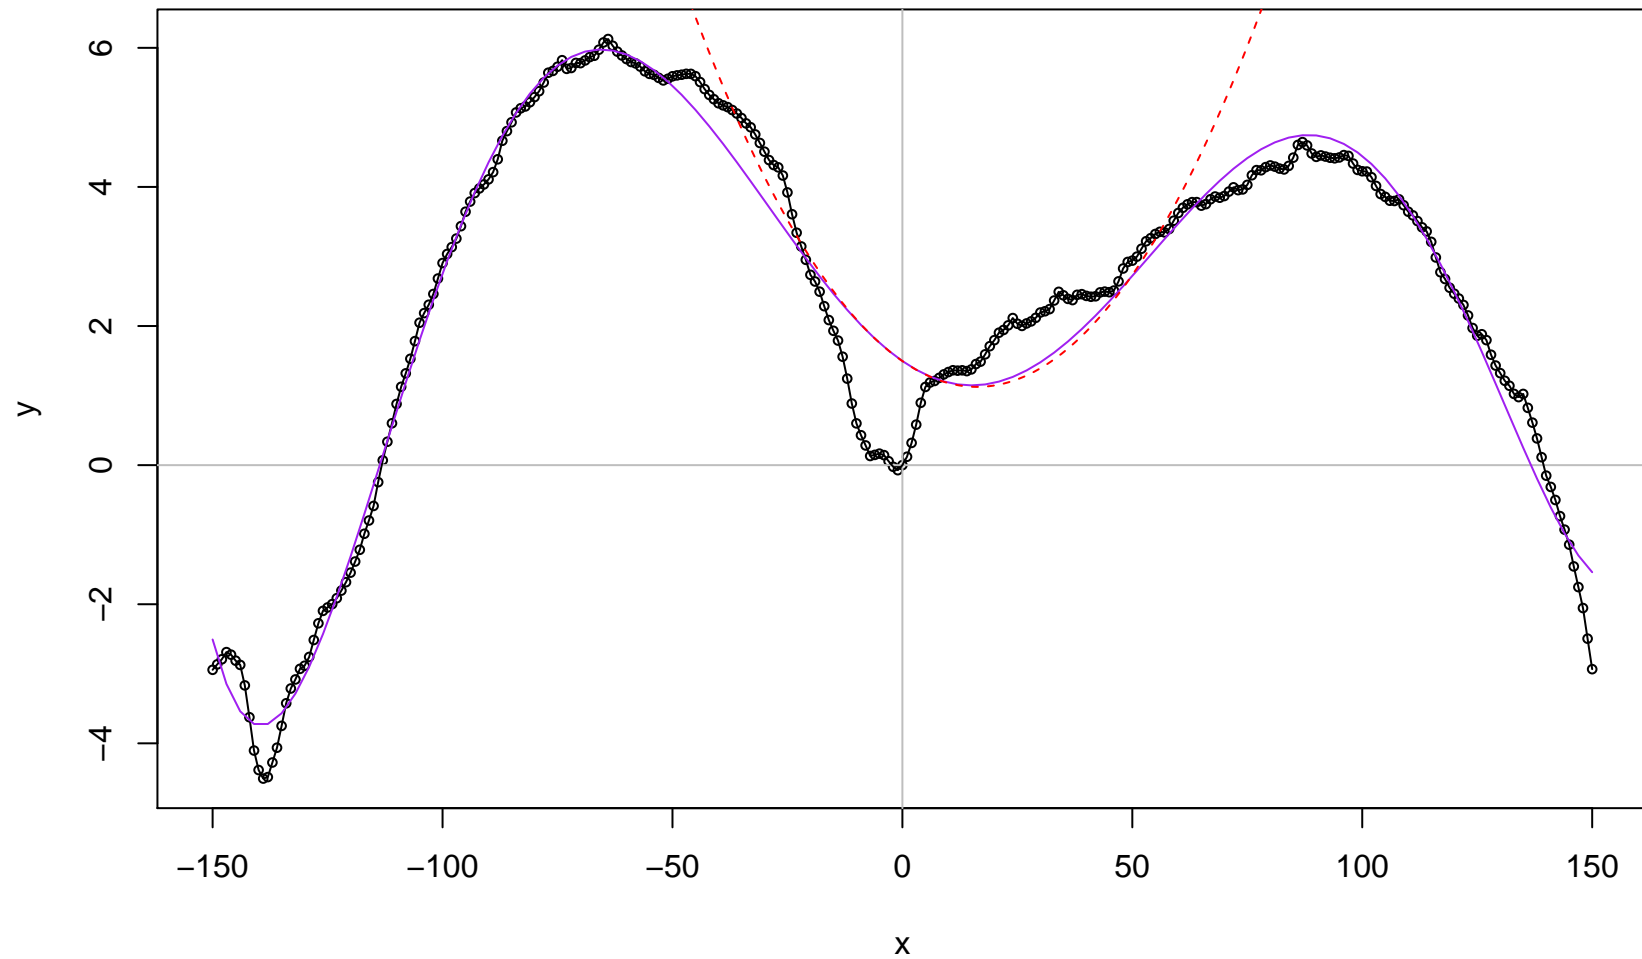

Site 108

$K*100= 1.2438$

$R^2= 0.9627$

radius= 80.4008

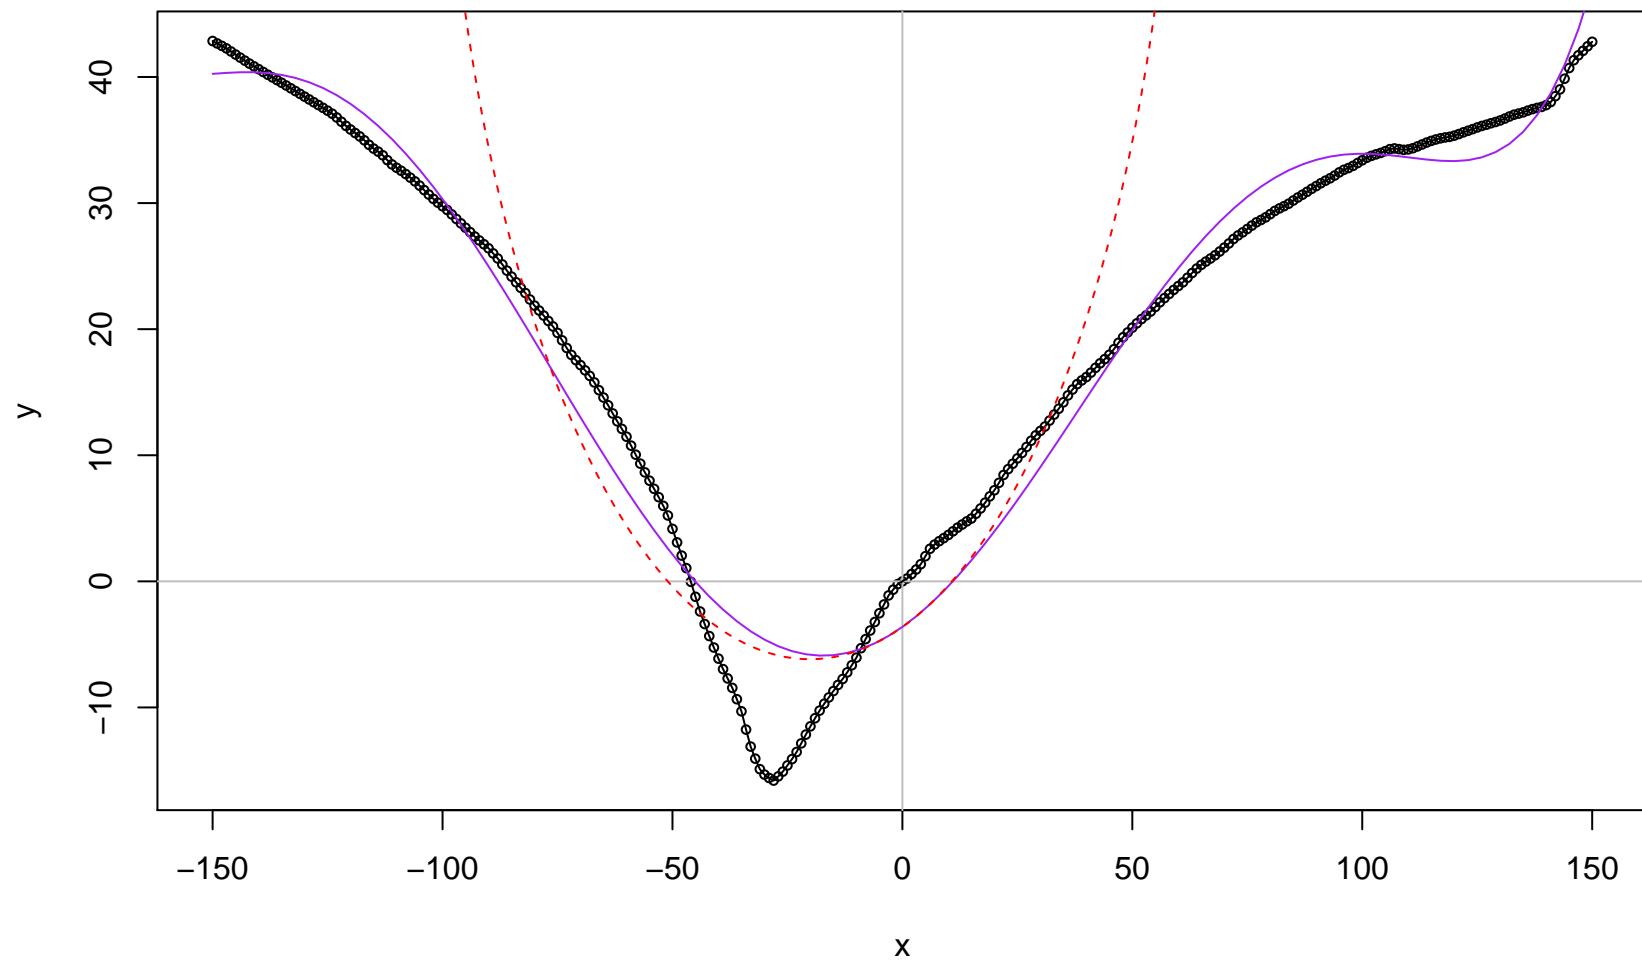

Site 109

$K \cdot 100 = 0.3706$

$R^2 = 0.9743$

radius= 269.8199

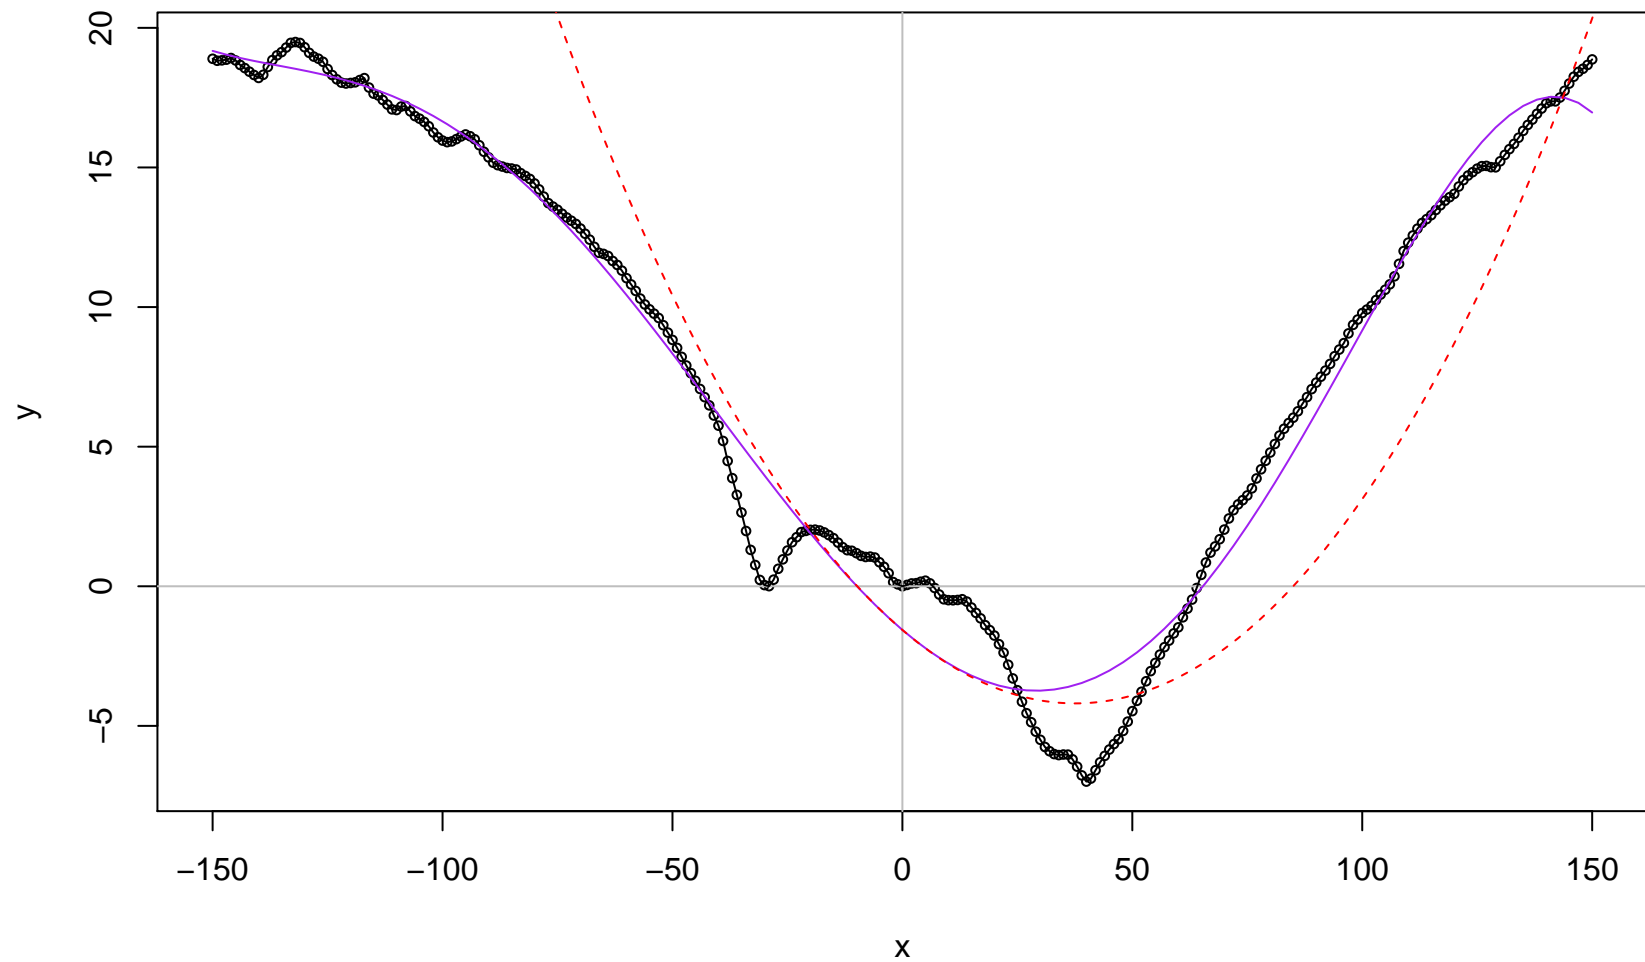

Site 110

$K*100= 0.2973$

$R^2= 0.9911$

radius= 336.3059

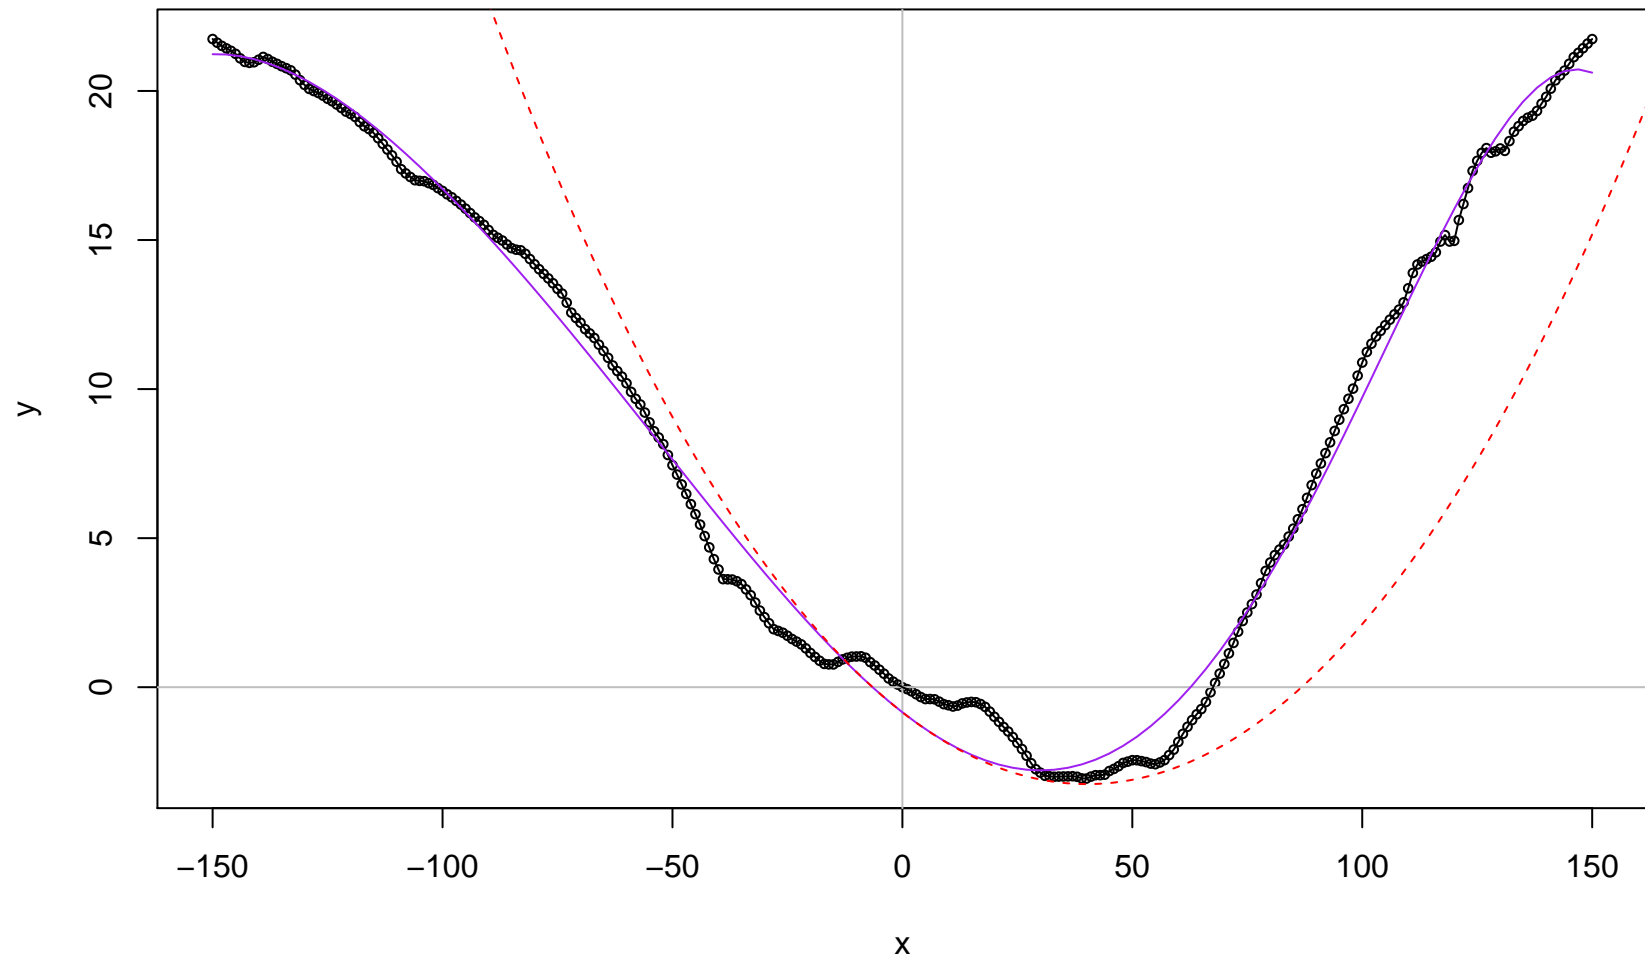

Site 111

$K \cdot 100 = 0.5201$

$R^2 = 0.9965$

radius= 192.2787

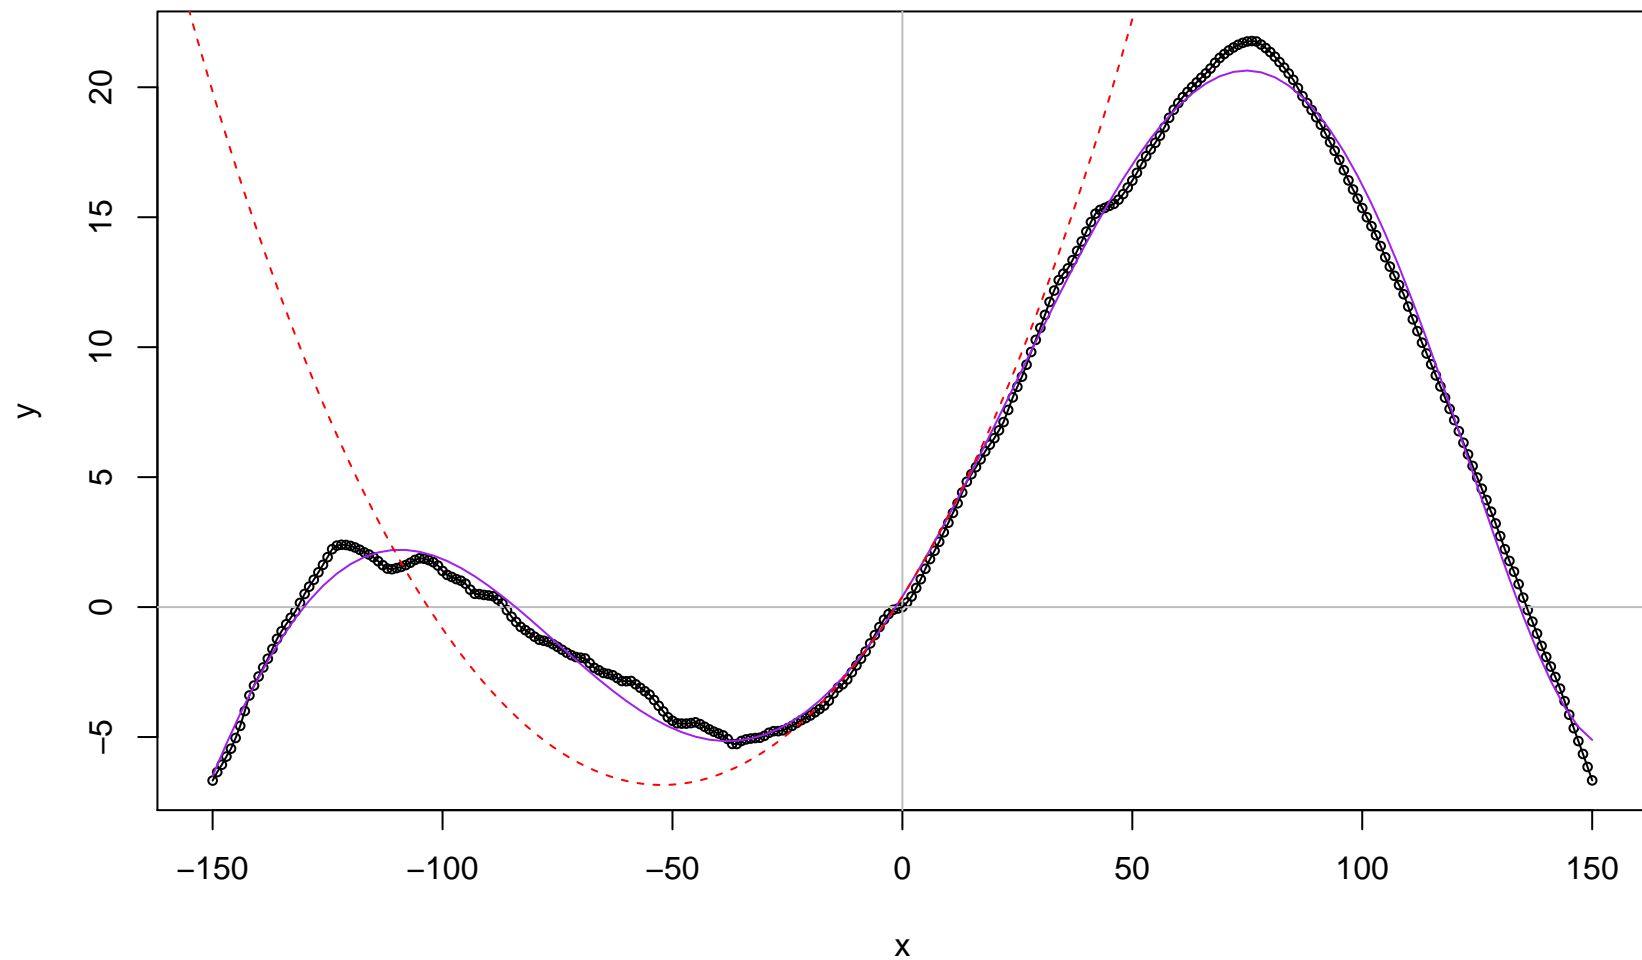

Site 112

$K \cdot 100 = 0.4353$

$R^2 = 0.9962$

radius= 229.7133

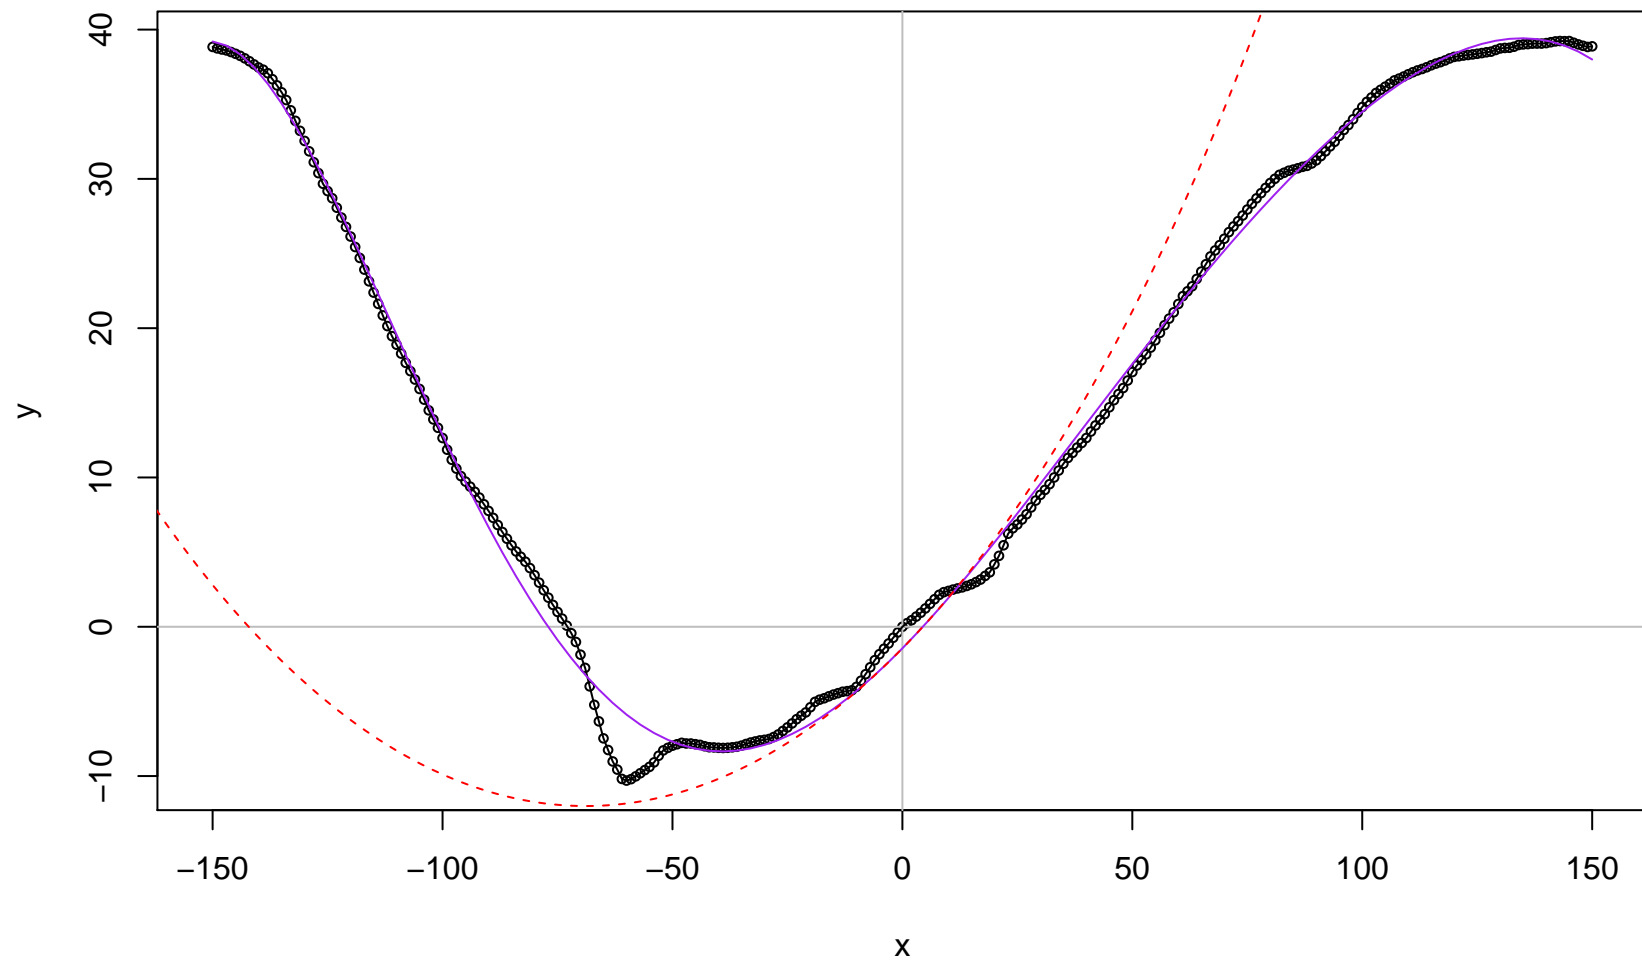



Site 113

$K \cdot 100 = 0.7667$

$R^2 = 0.9957$

radius= 130.4329

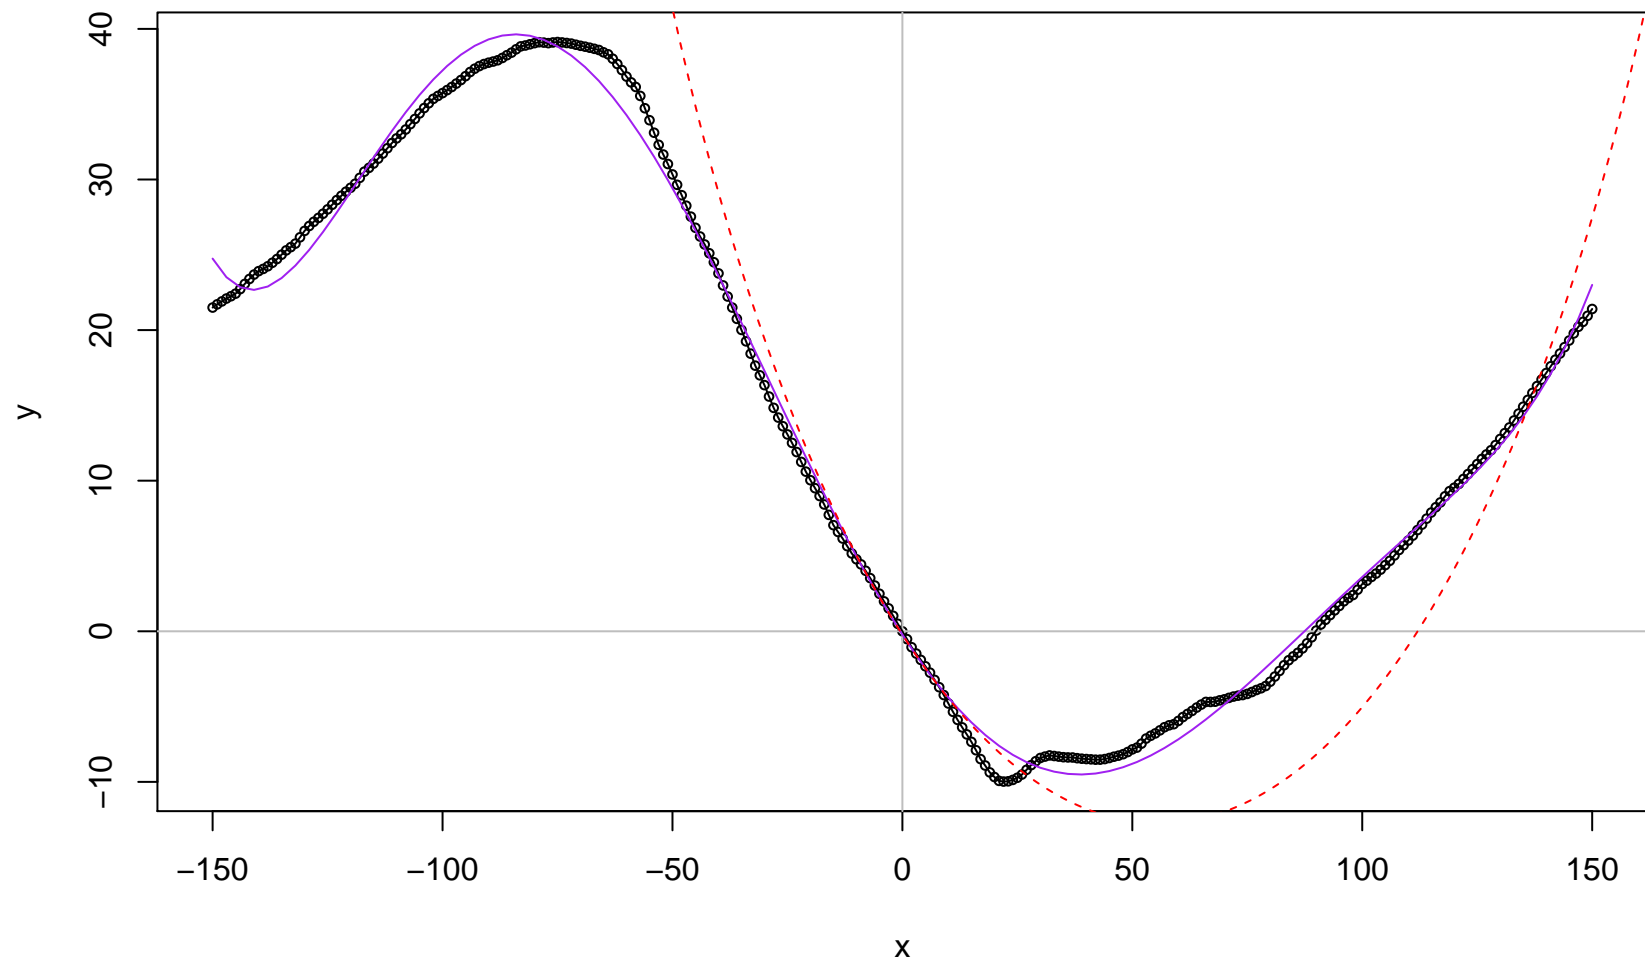

Site 114

$K*100 = -0.7354$

$R^2 = 0.9976$

radius=  $-135.9749$

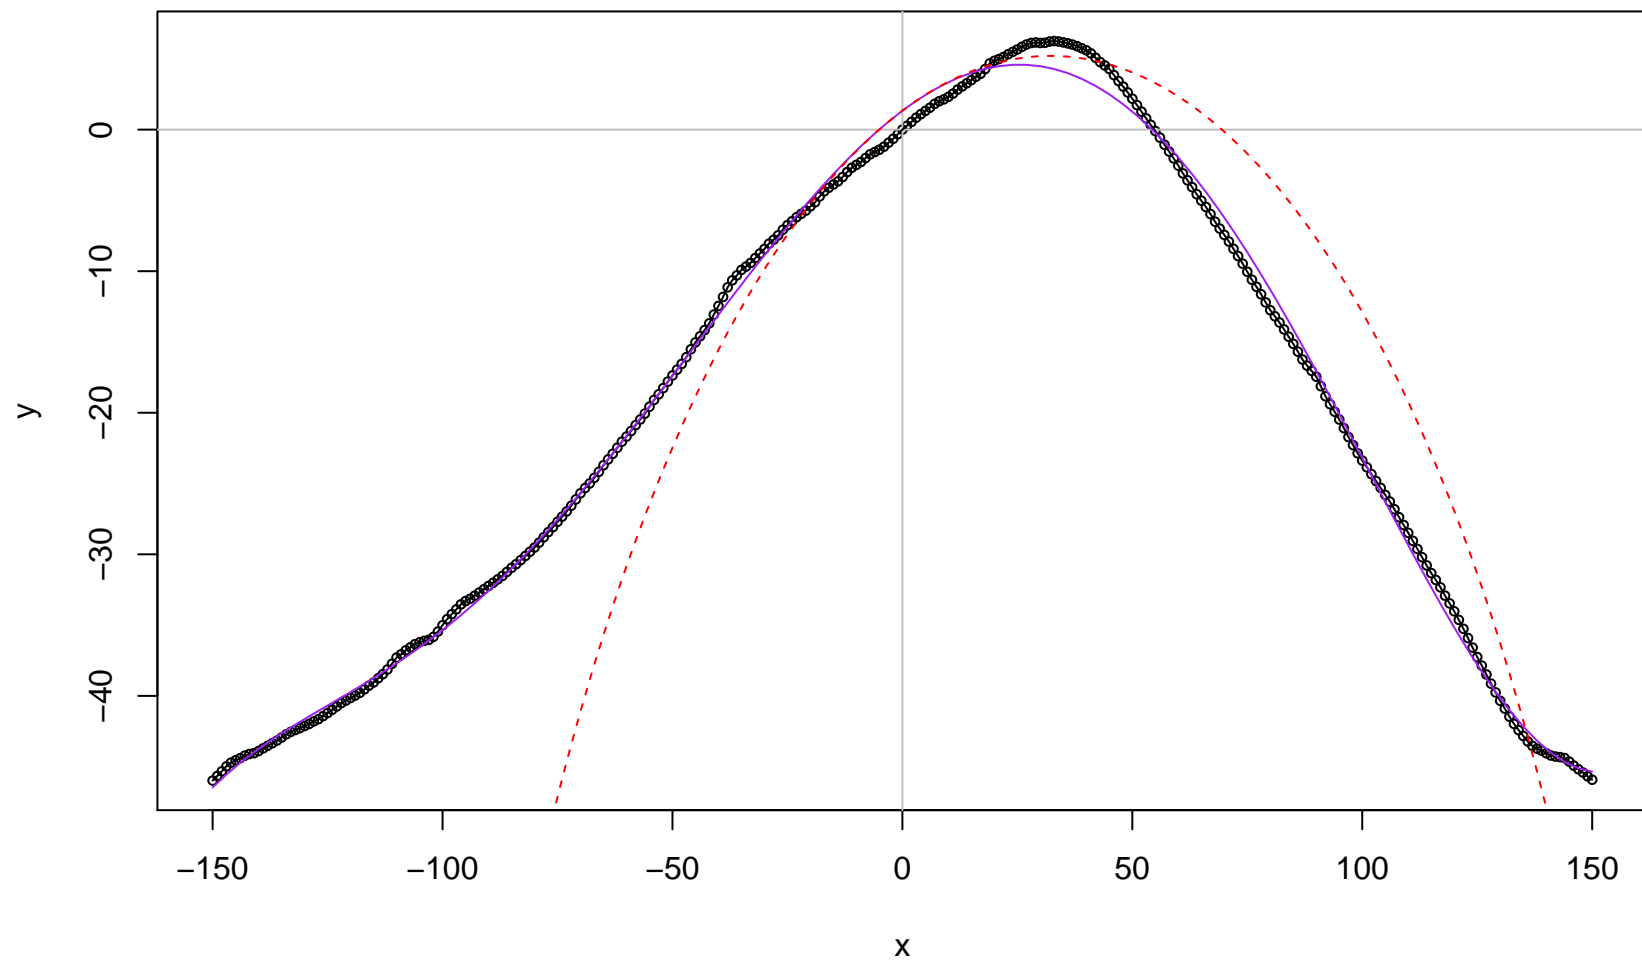

Site 115

$K*100 = -0.4409$

$R^2 = 0.9459$

radius =  $-226.8153$

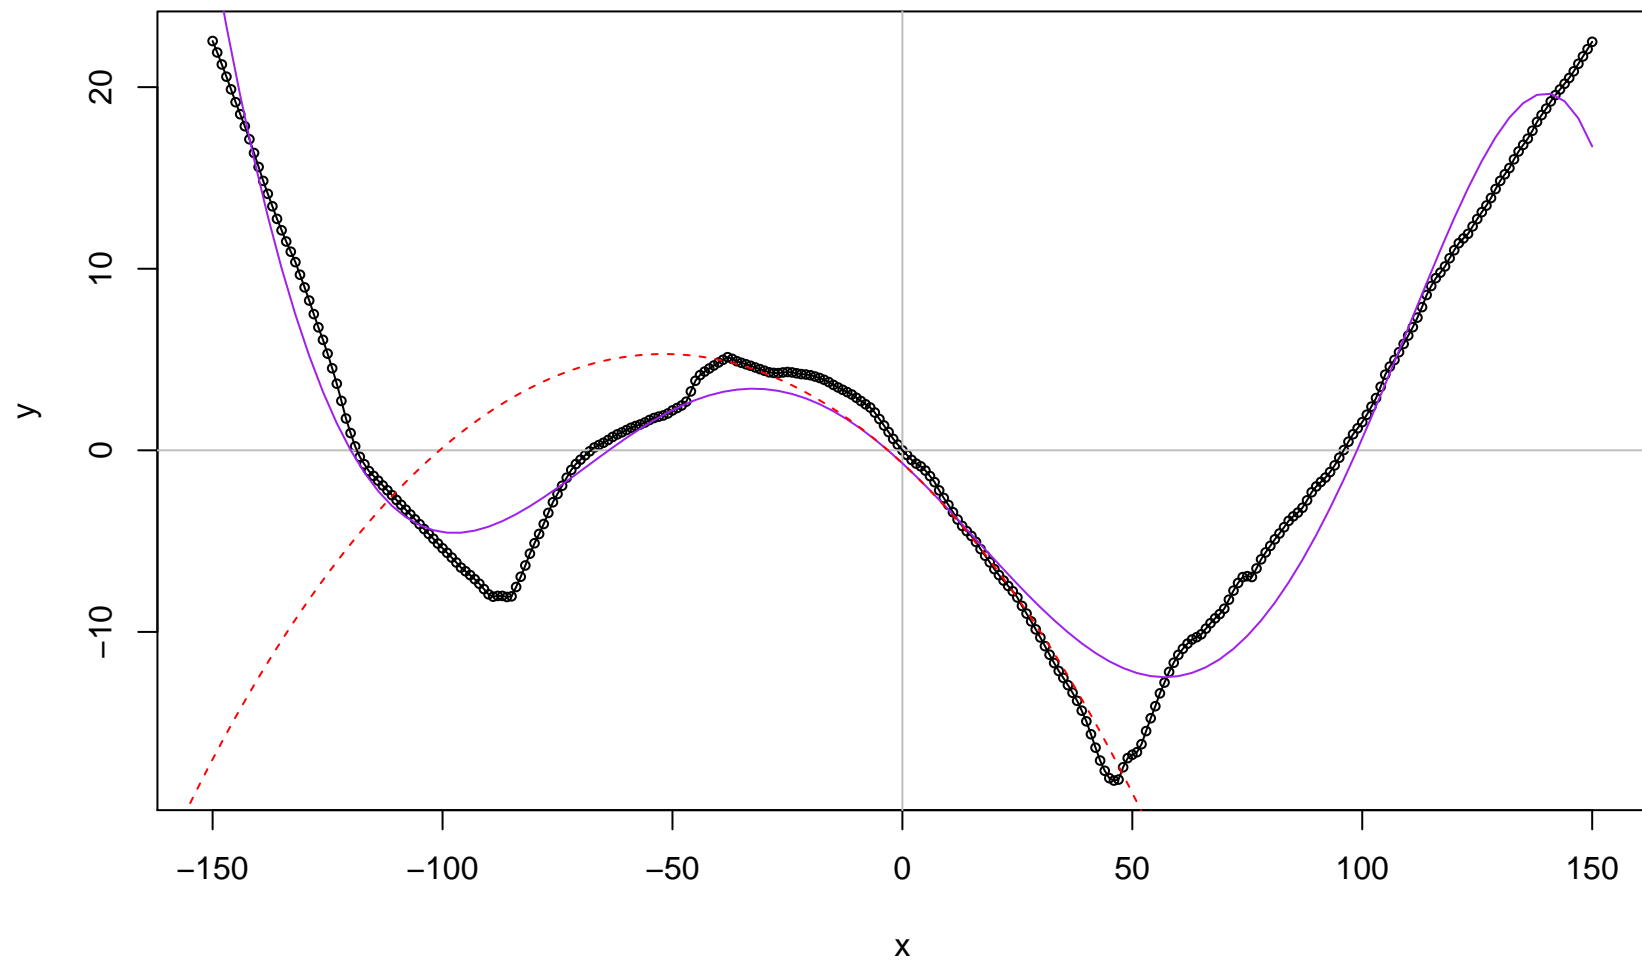

Site 116

$K \cdot 100 = 0.0769$

$R^2 = 0.9586$

radius= 1300.3562

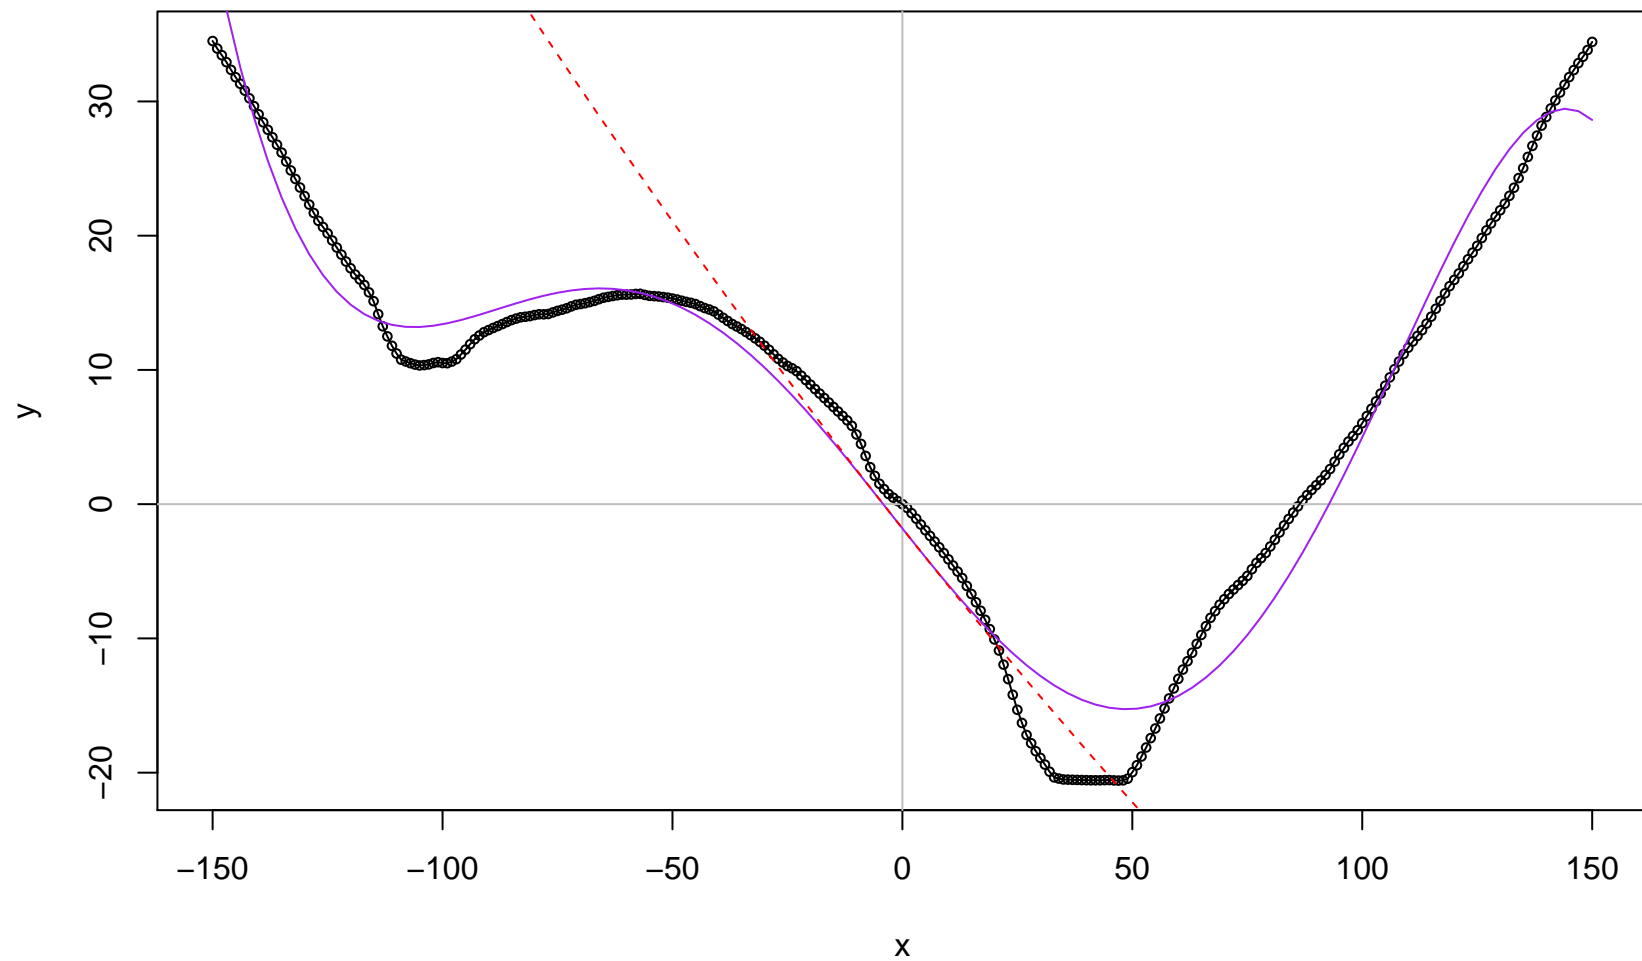

Site 117

$K \cdot 100 = 0.2237$

$R^2 = 0.9881$

radius= 447.026

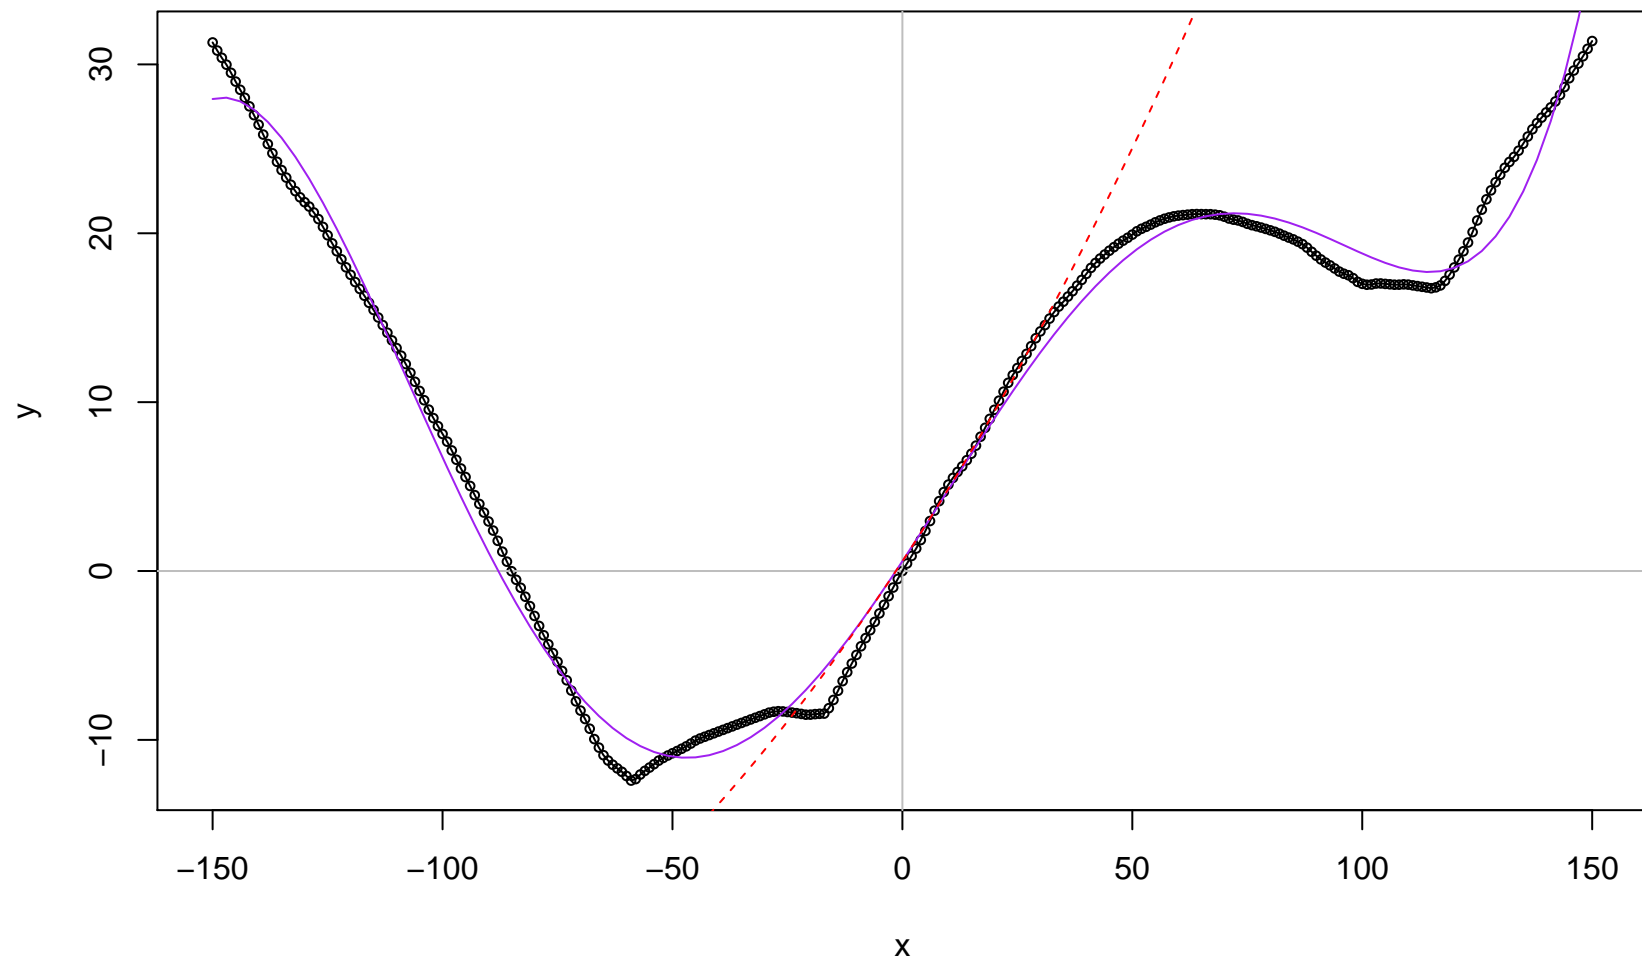

Site 118

$K*100= 0.9283$

$R^2= 0.9922$

radius= 107.7211

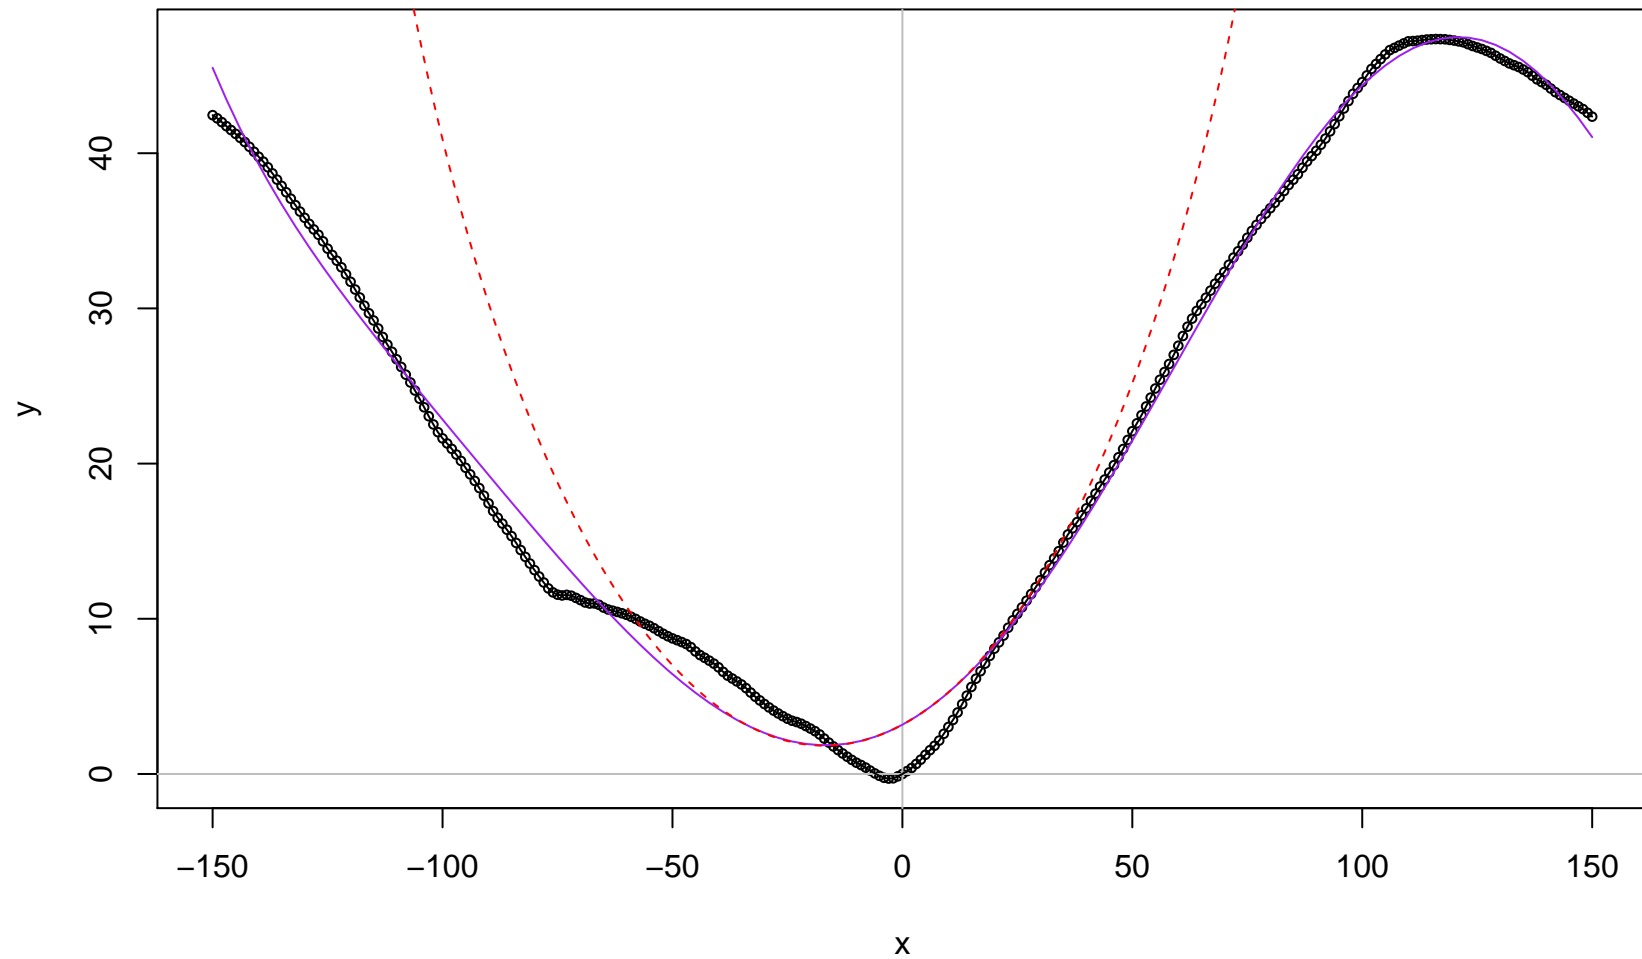

Site 119

$K \cdot 100 = -0.2611$

$R^2 = 0.9832$

radius= -382.9276

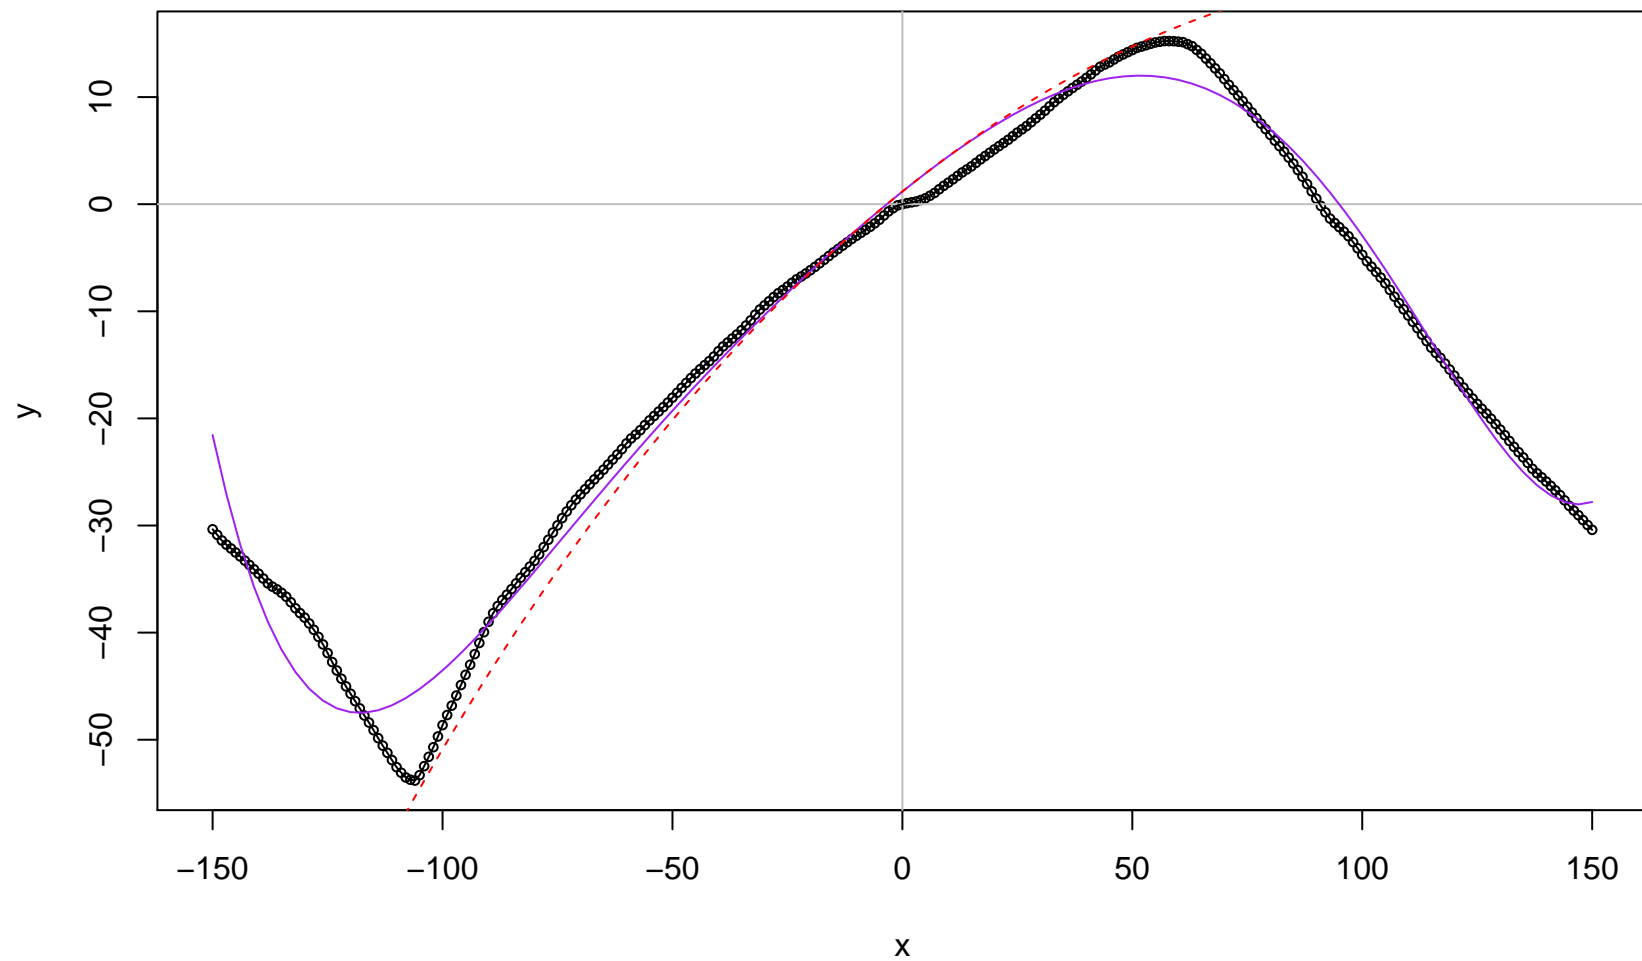

Site 120

$K \cdot 100 = 0.7456$

$R^2 = 0.9668$

radius= 134.1201

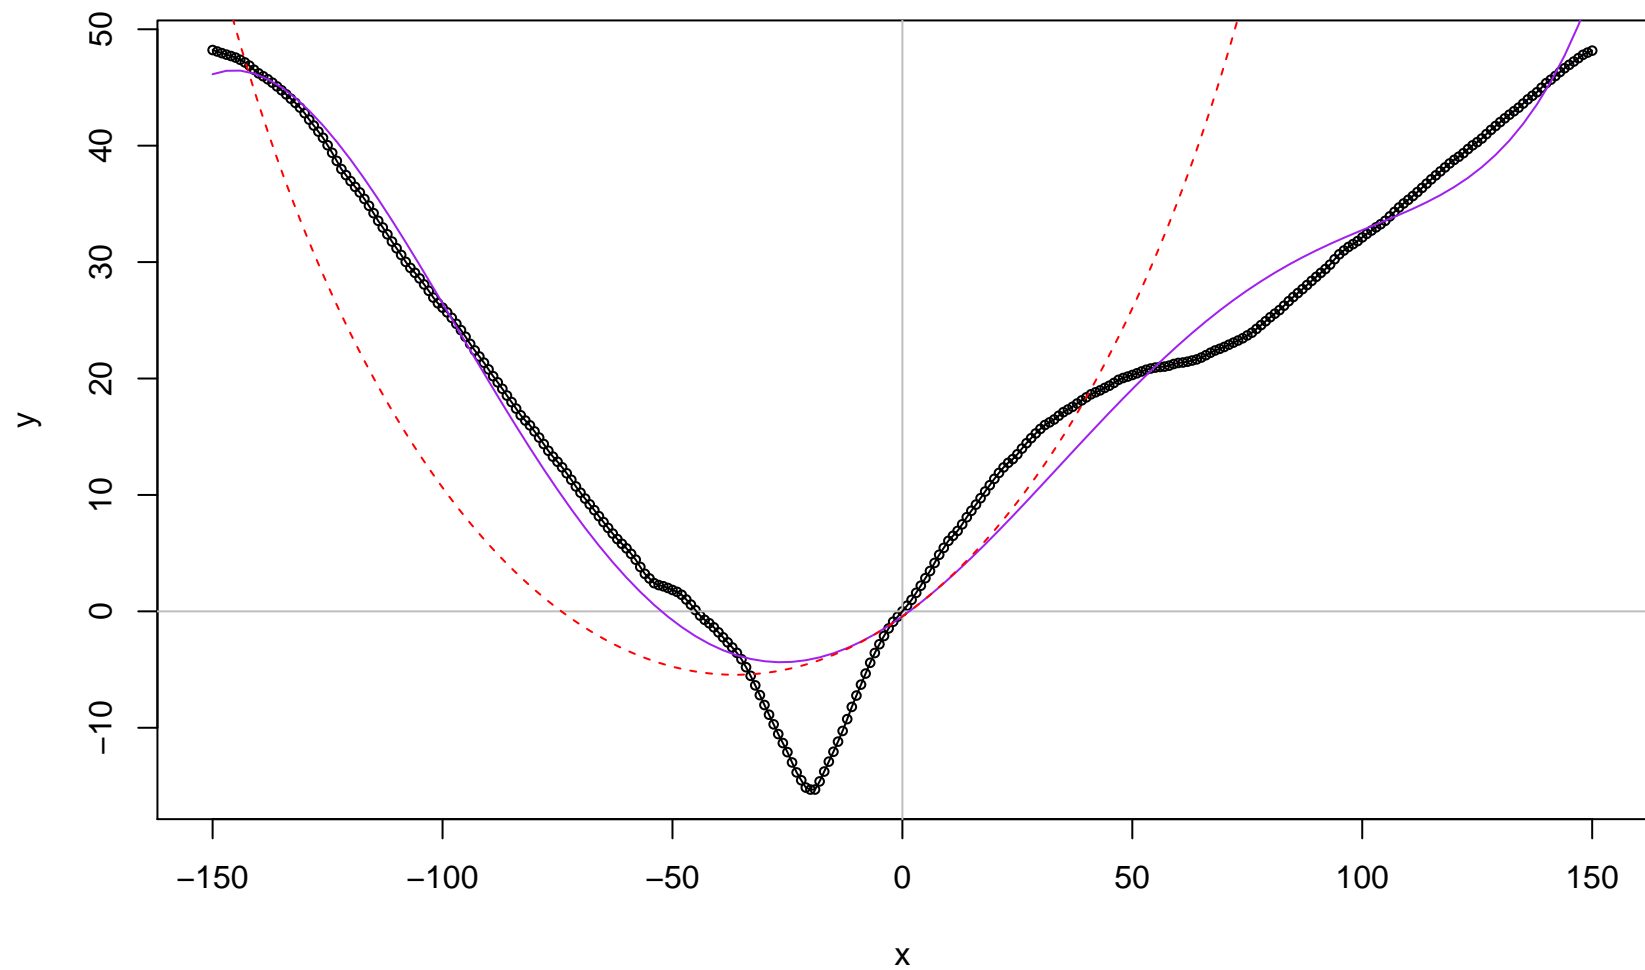



Site 121

$K*100= 0.9961$

$R^2= 0.9789$

radius= 100.3956

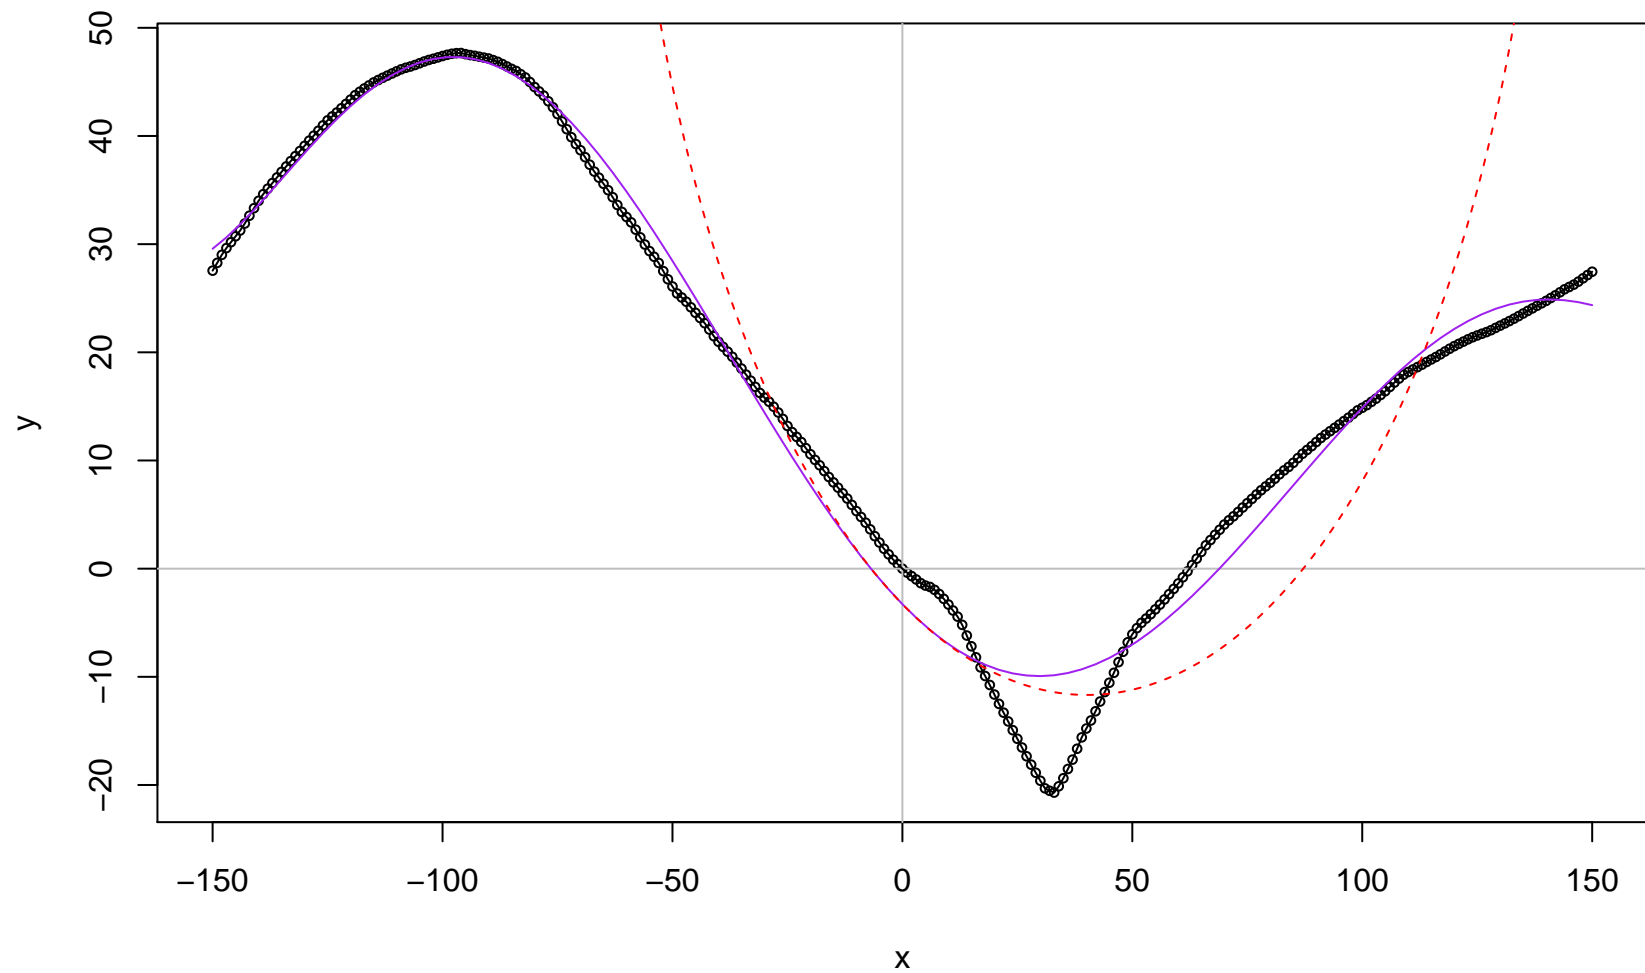

Site 122

$K*100= 1.4018$

$R^2= 0.9717$

radius= 71.3371

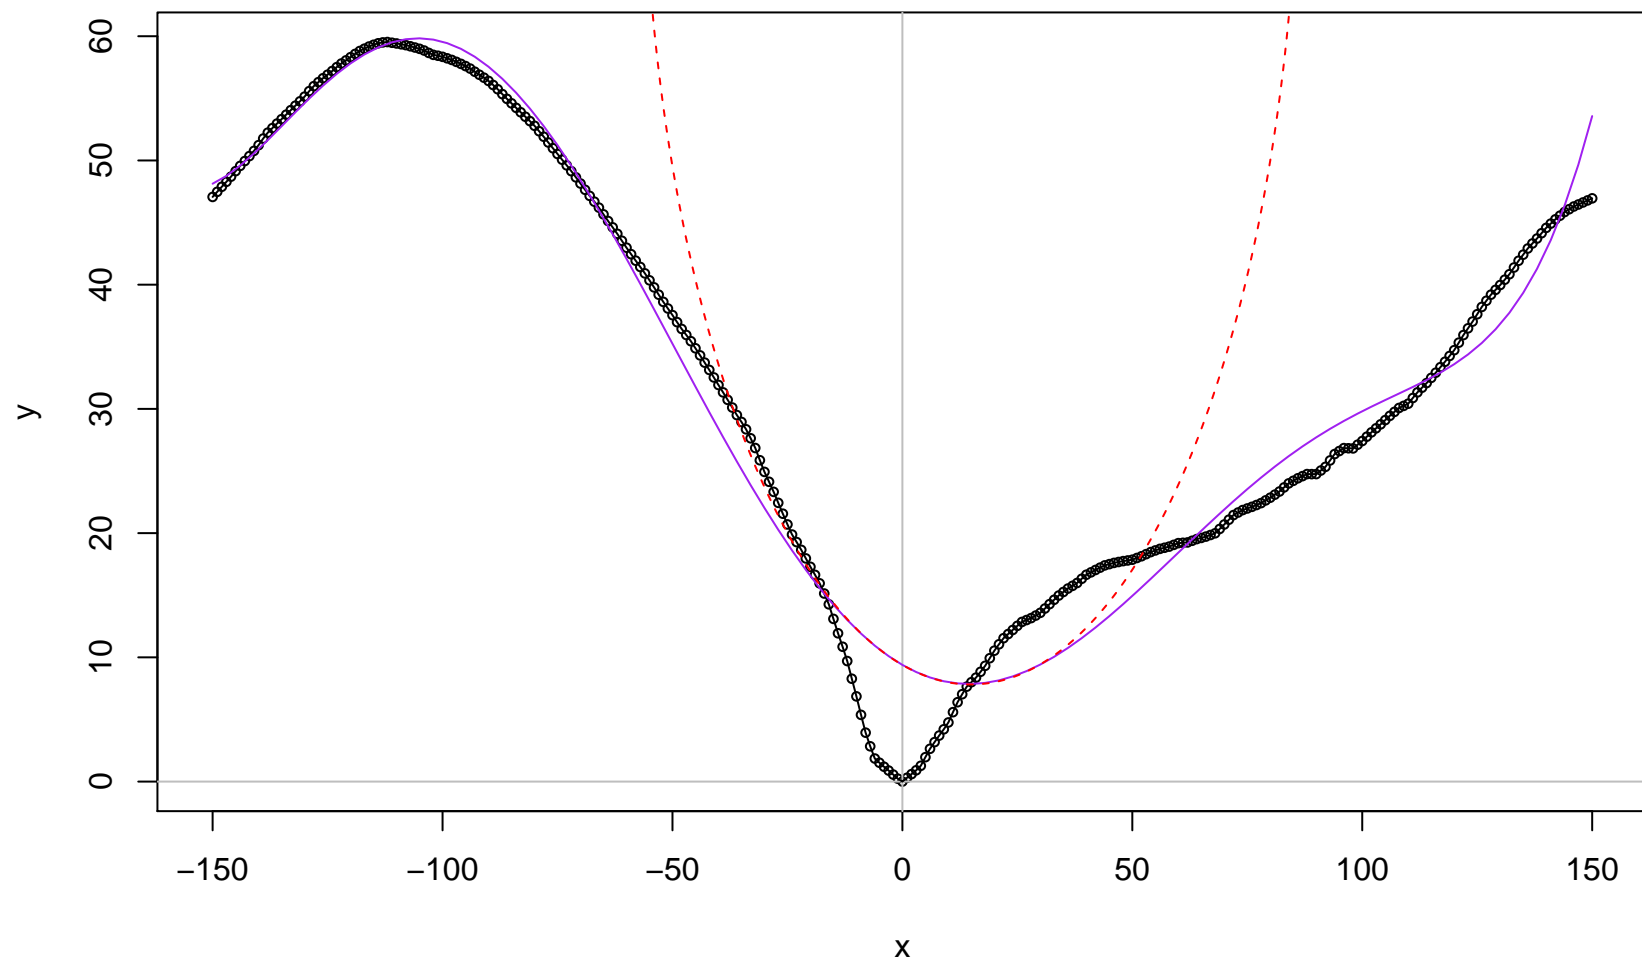

Site 123

$K*100= 1.1915$

$R^2= 0.9926$

radius= 83.9244

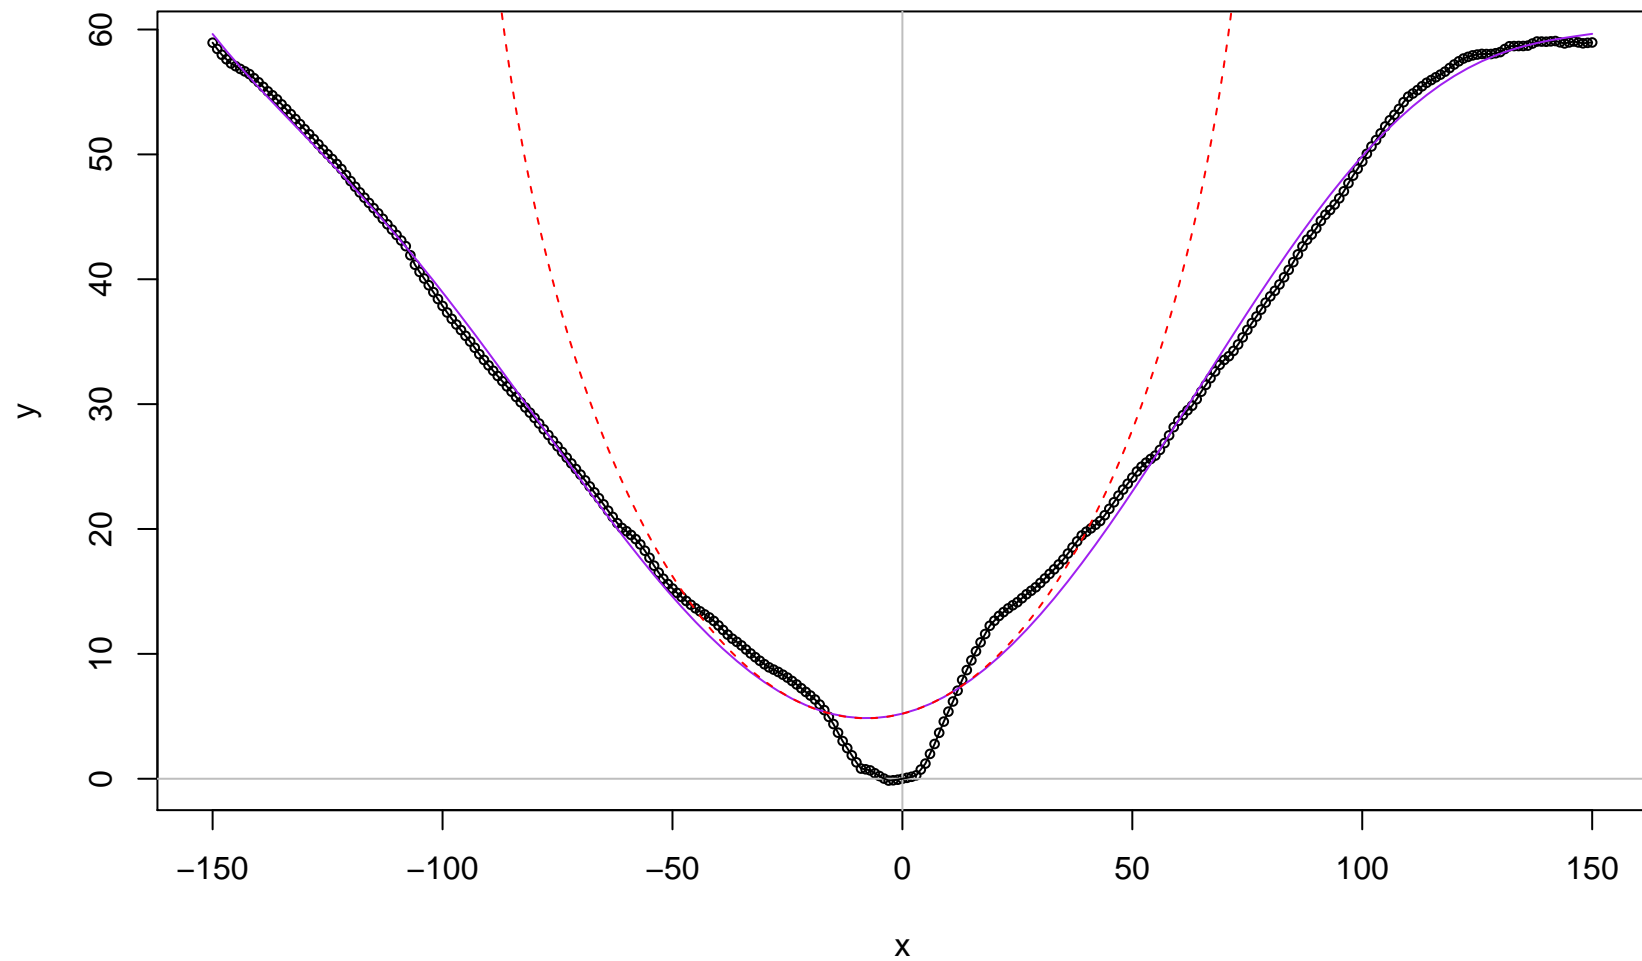

Site 124

$K*100 = -0.0878$

$R^2 = 0.9521$

radius = -1139.0022

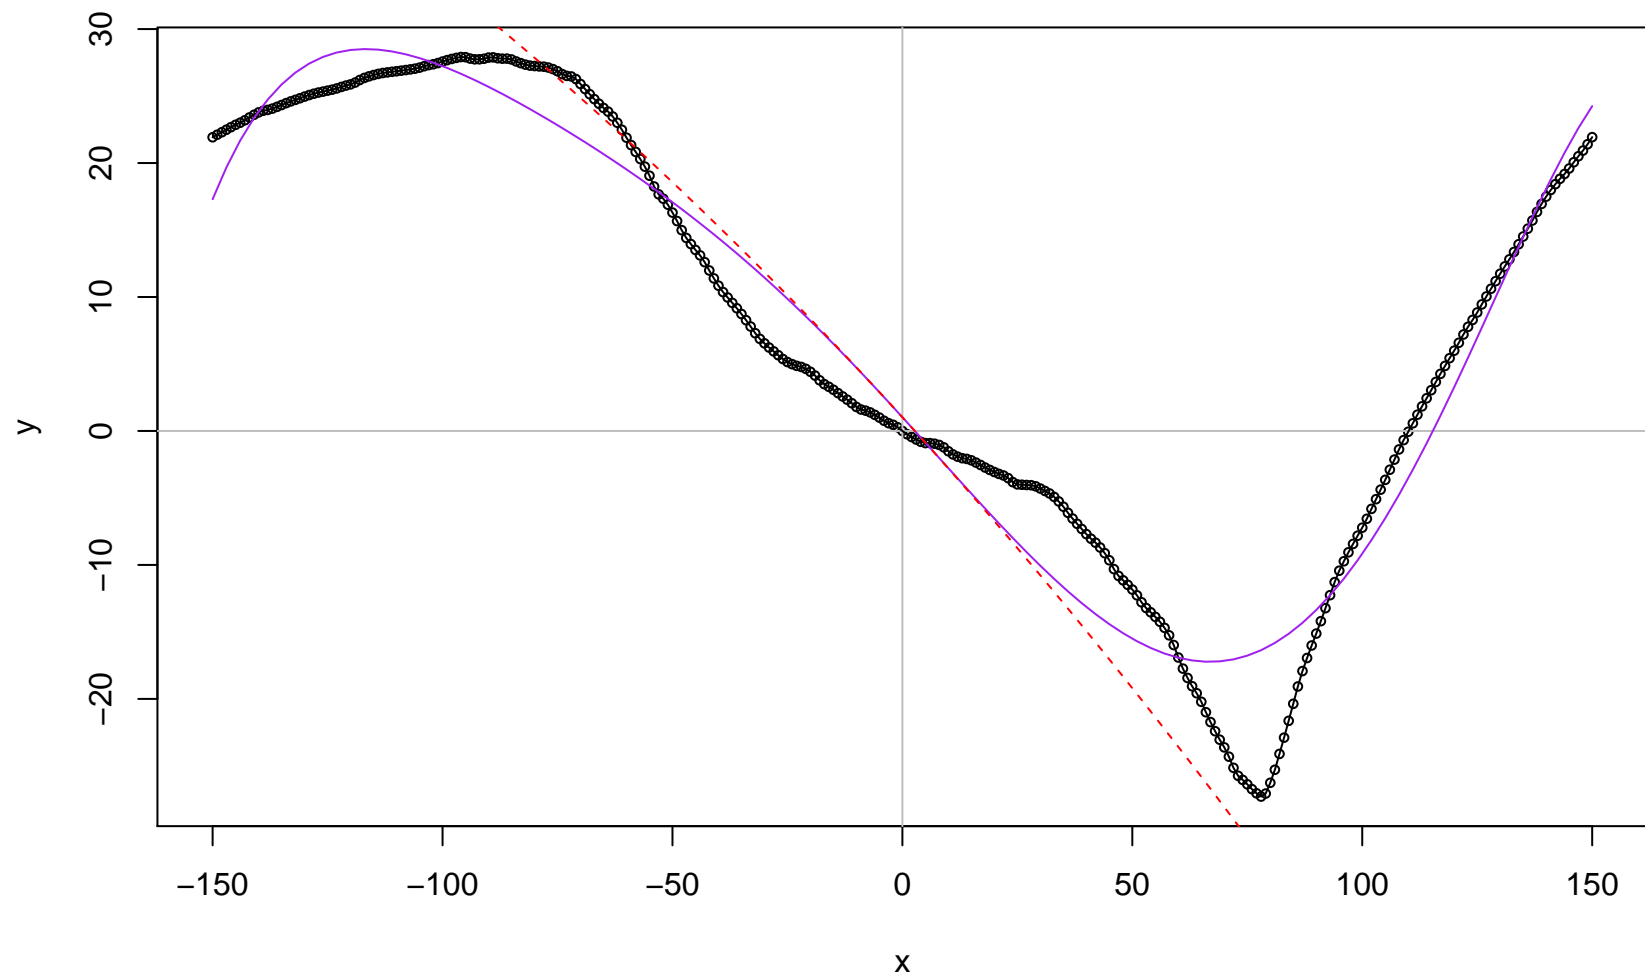

Site 125

$K*100 = -0.7738$

$R^2 = 0.9929$

radius =  $-129.2319$

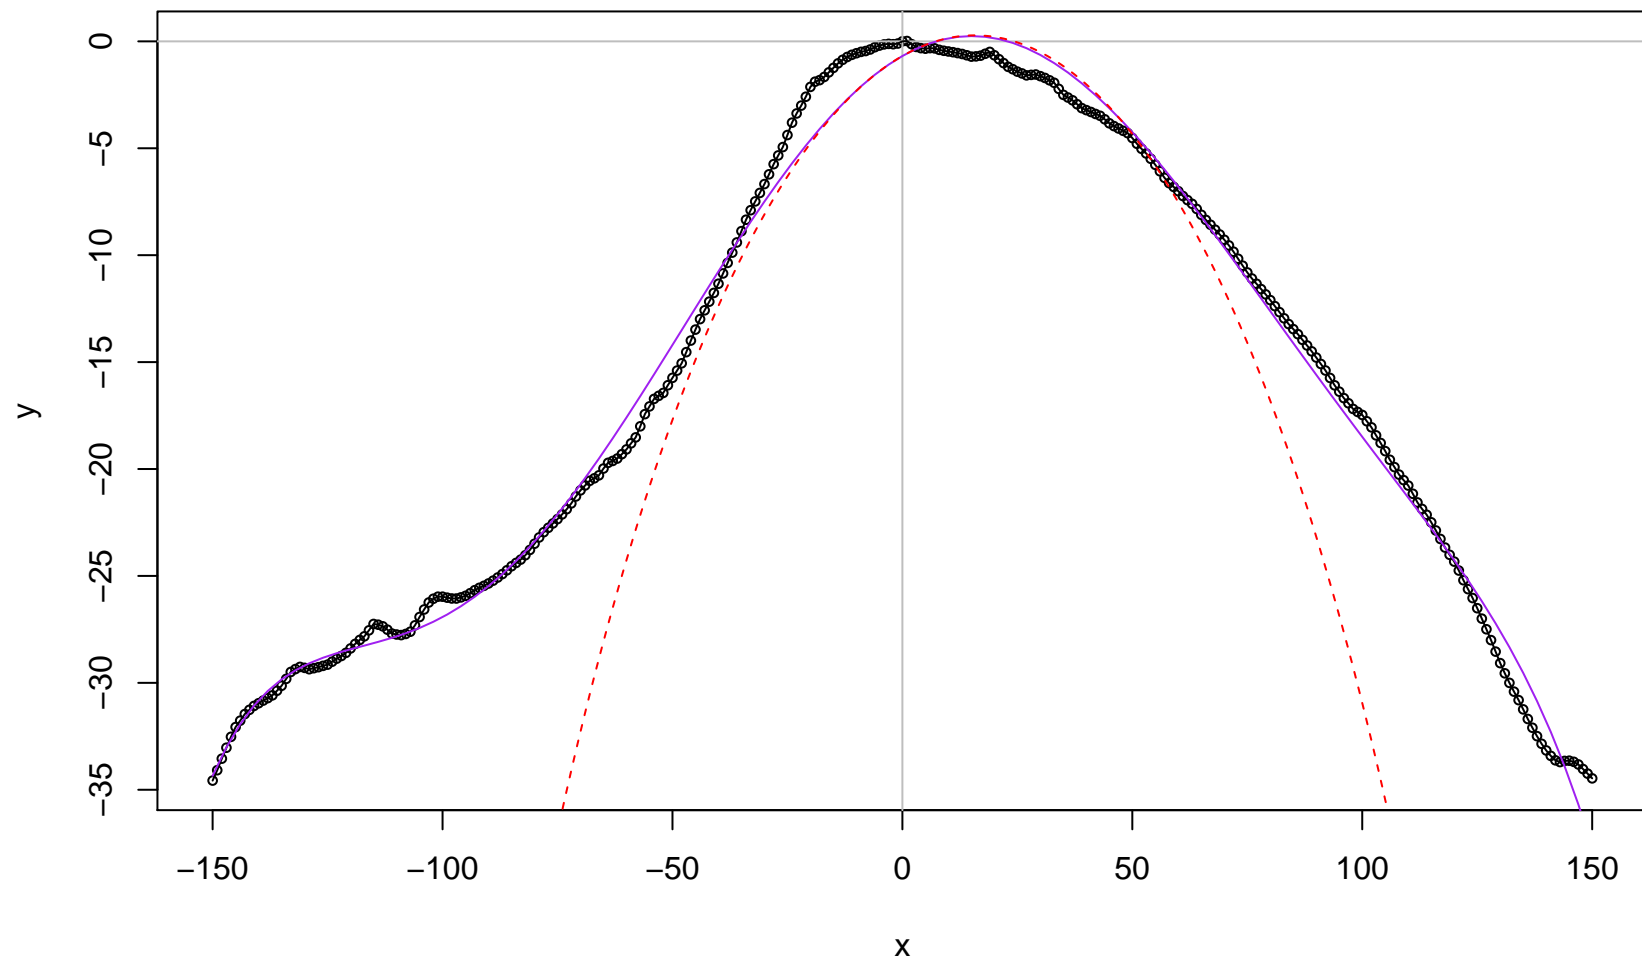

Site 126

$K*100 = -0.1427$

$R^2 = 0.9925$

radius =  $-700.7034$

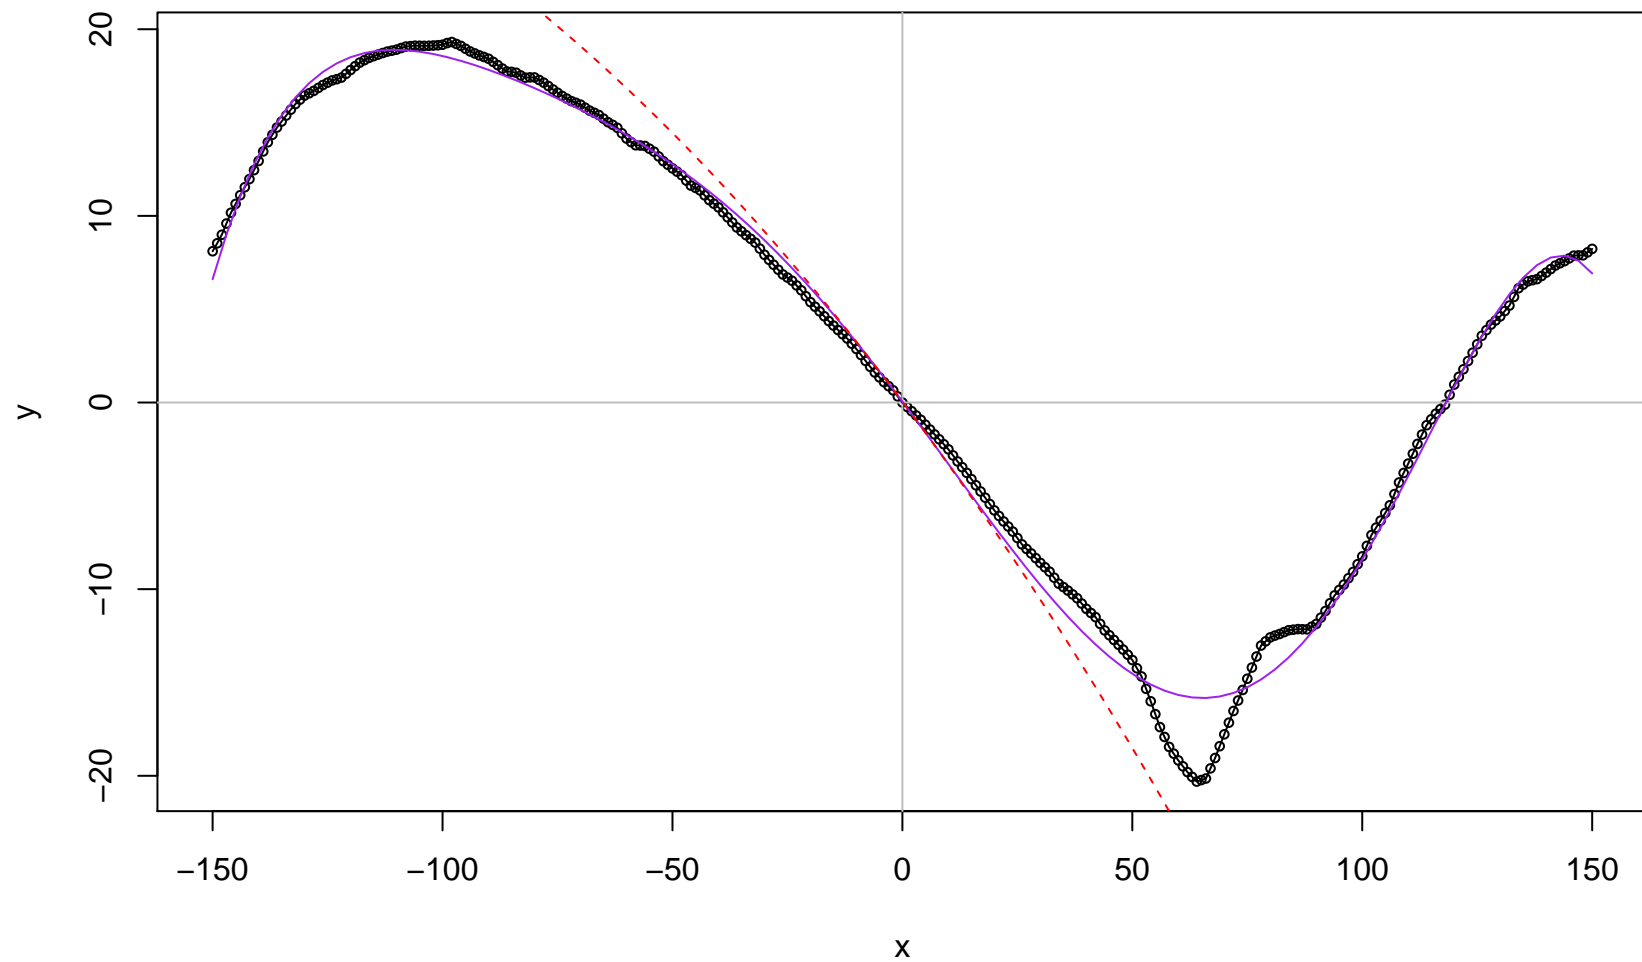

**Site 127**

**$K \cdot 100 = 0.5264$**

**$R^2 = 0.9936$**

**radius= 189.9543**

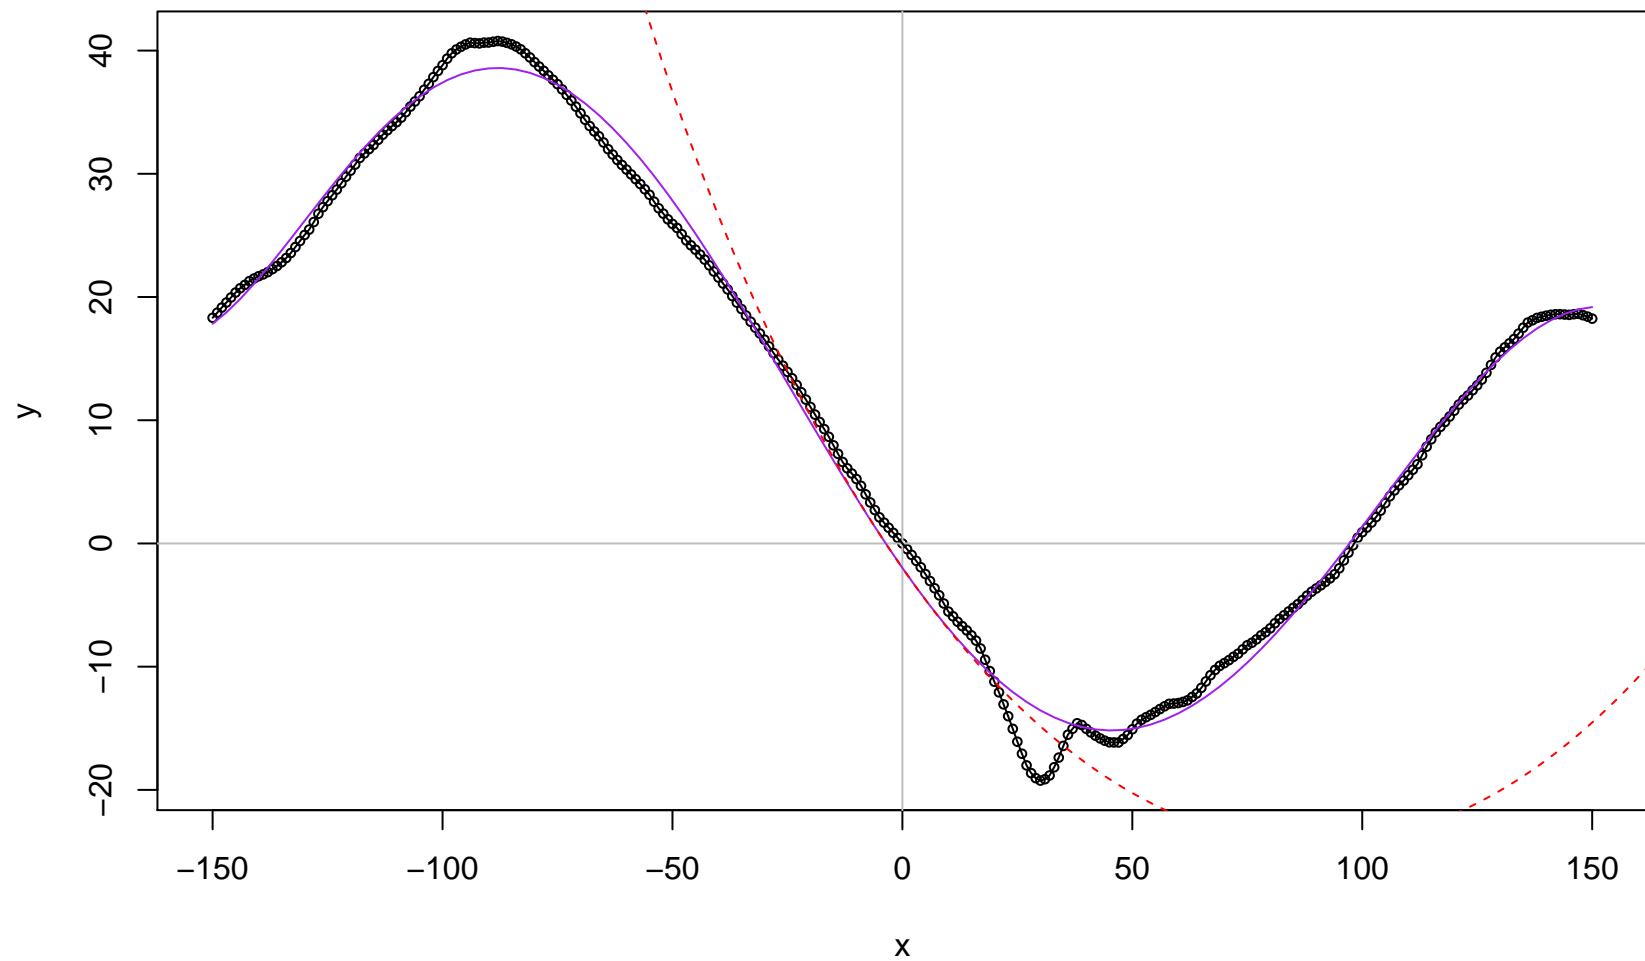

Site 128

$K*100 = -0.5683$

$R^2 = 0.9643$

radius =  $-175.9522$

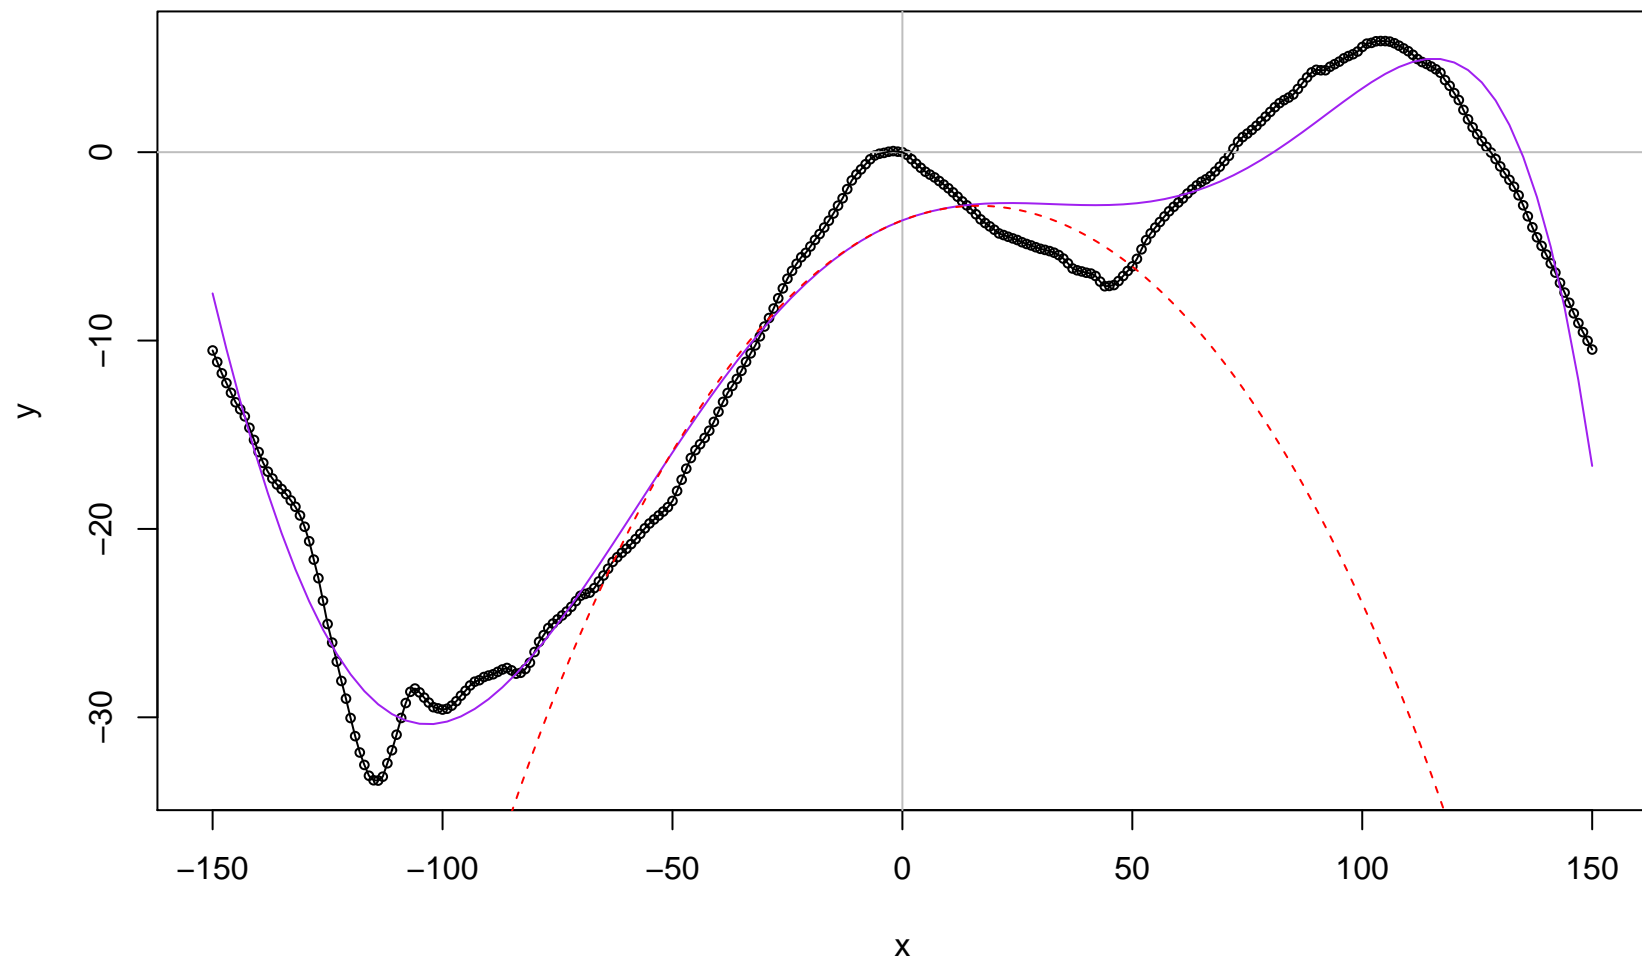



Site 129

$K \cdot 100 = -0.2782$

$R^2 = 0.9905$

radius =  $-359.4818$

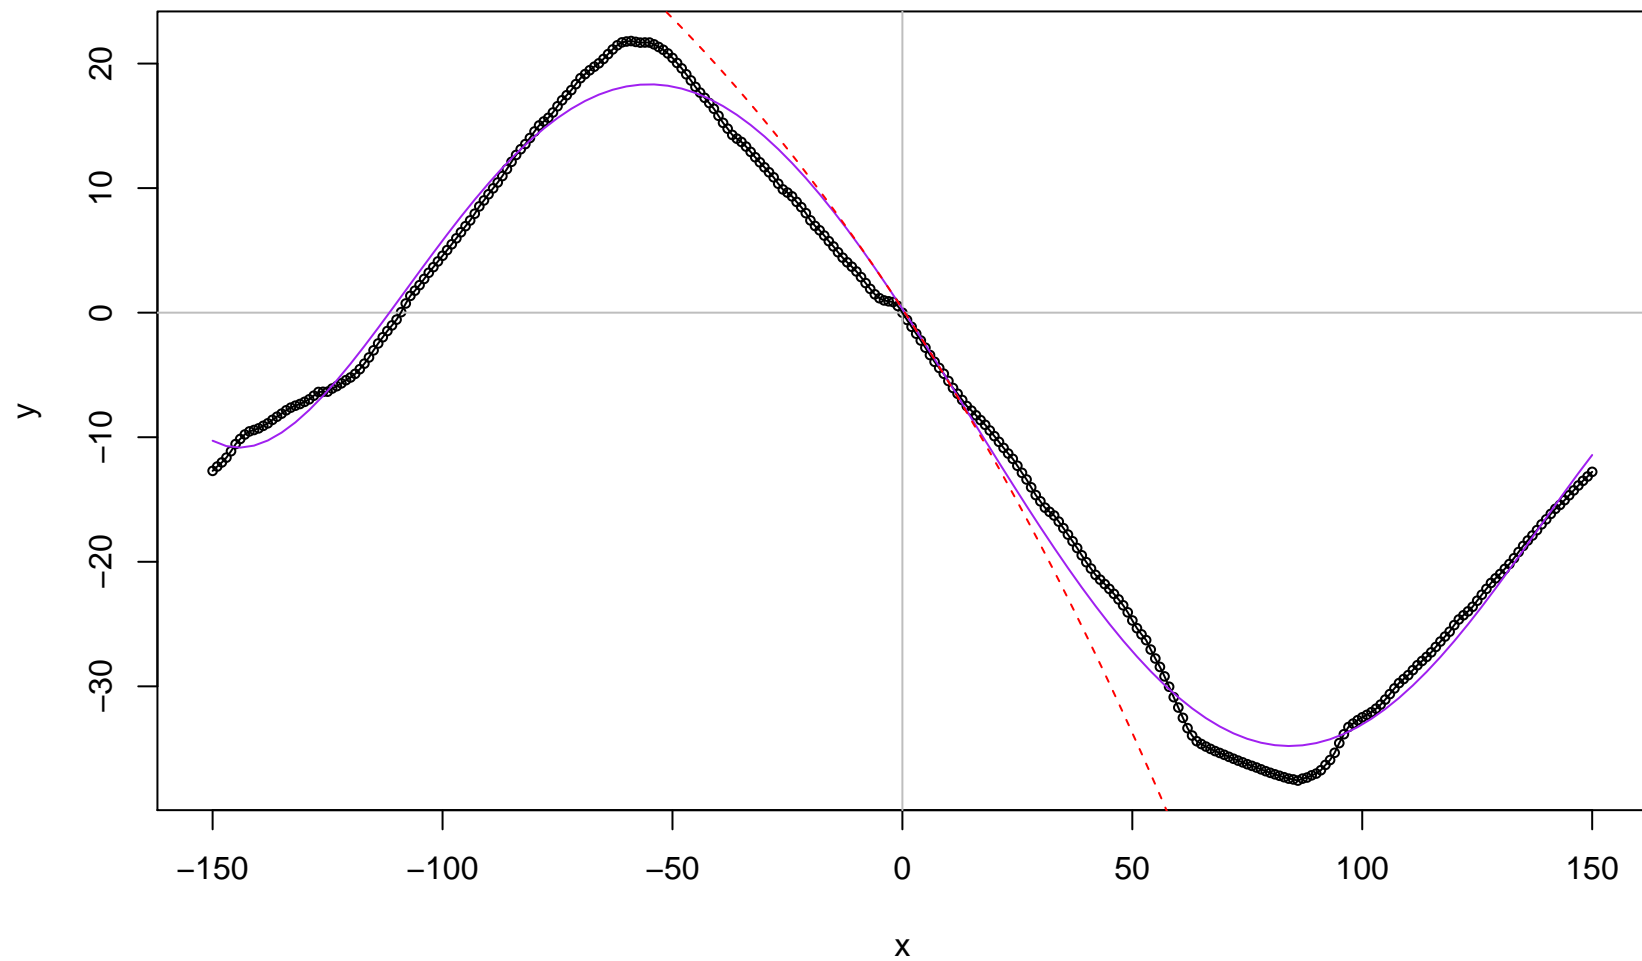

Site 130

$K \cdot 100 = 0.6634$

$R^2 = 0.9585$

radius= 150.7342

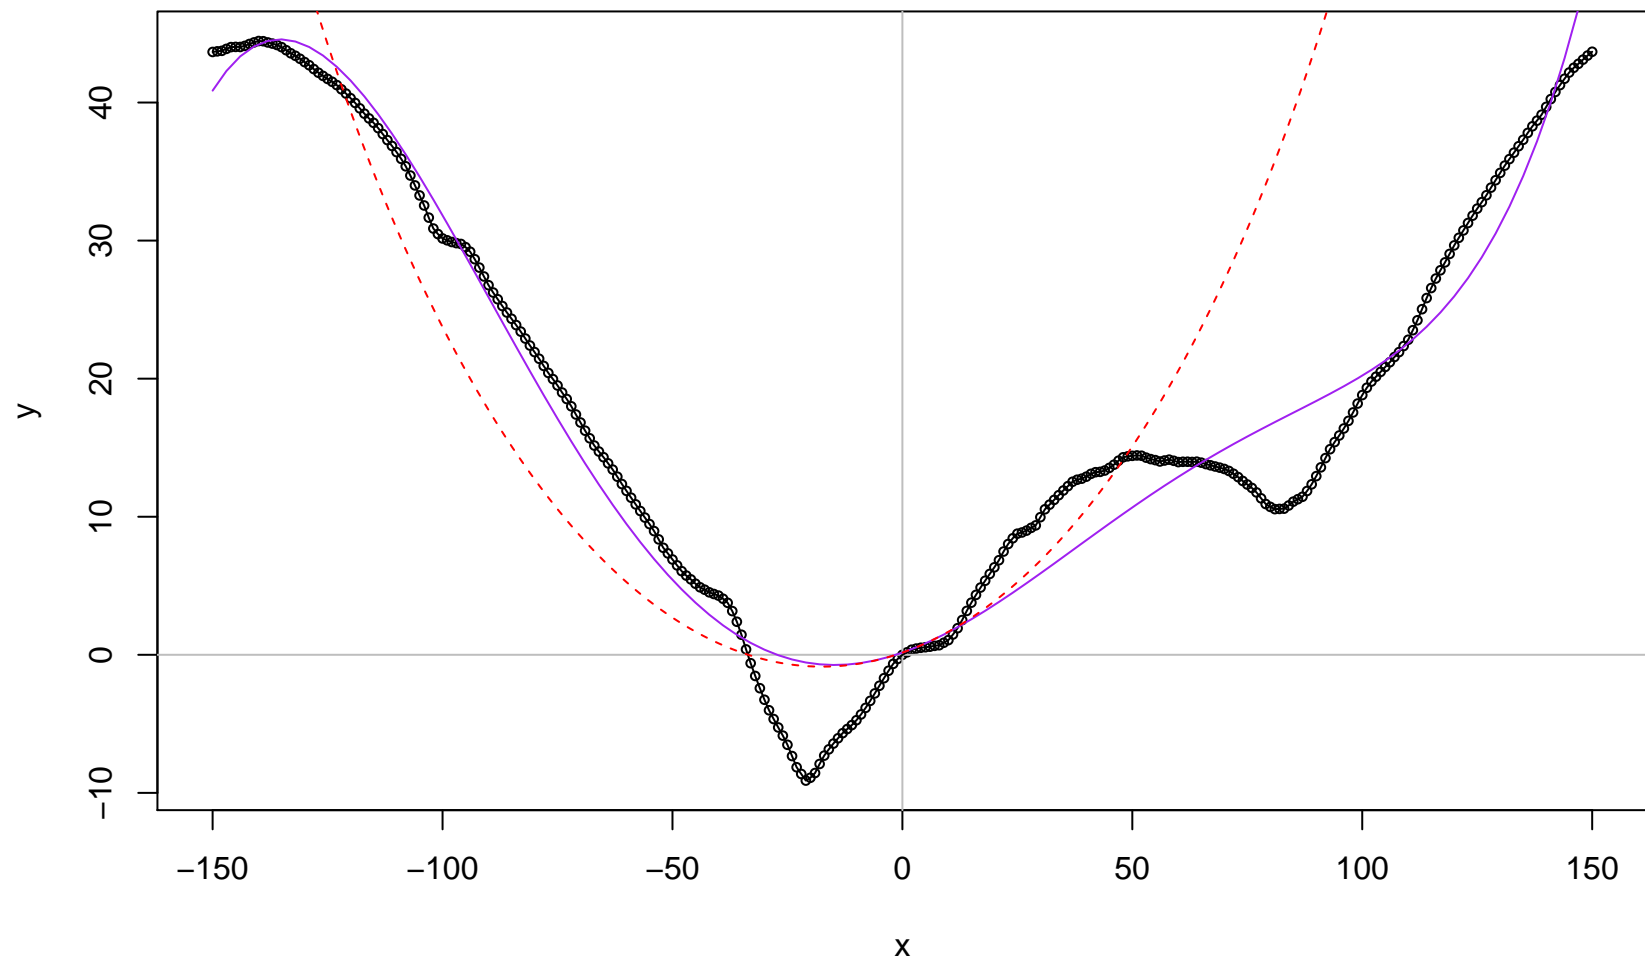

Site 131

$K*100= 0.5399$

$R^2= 0.9742$

radius= 185.2211

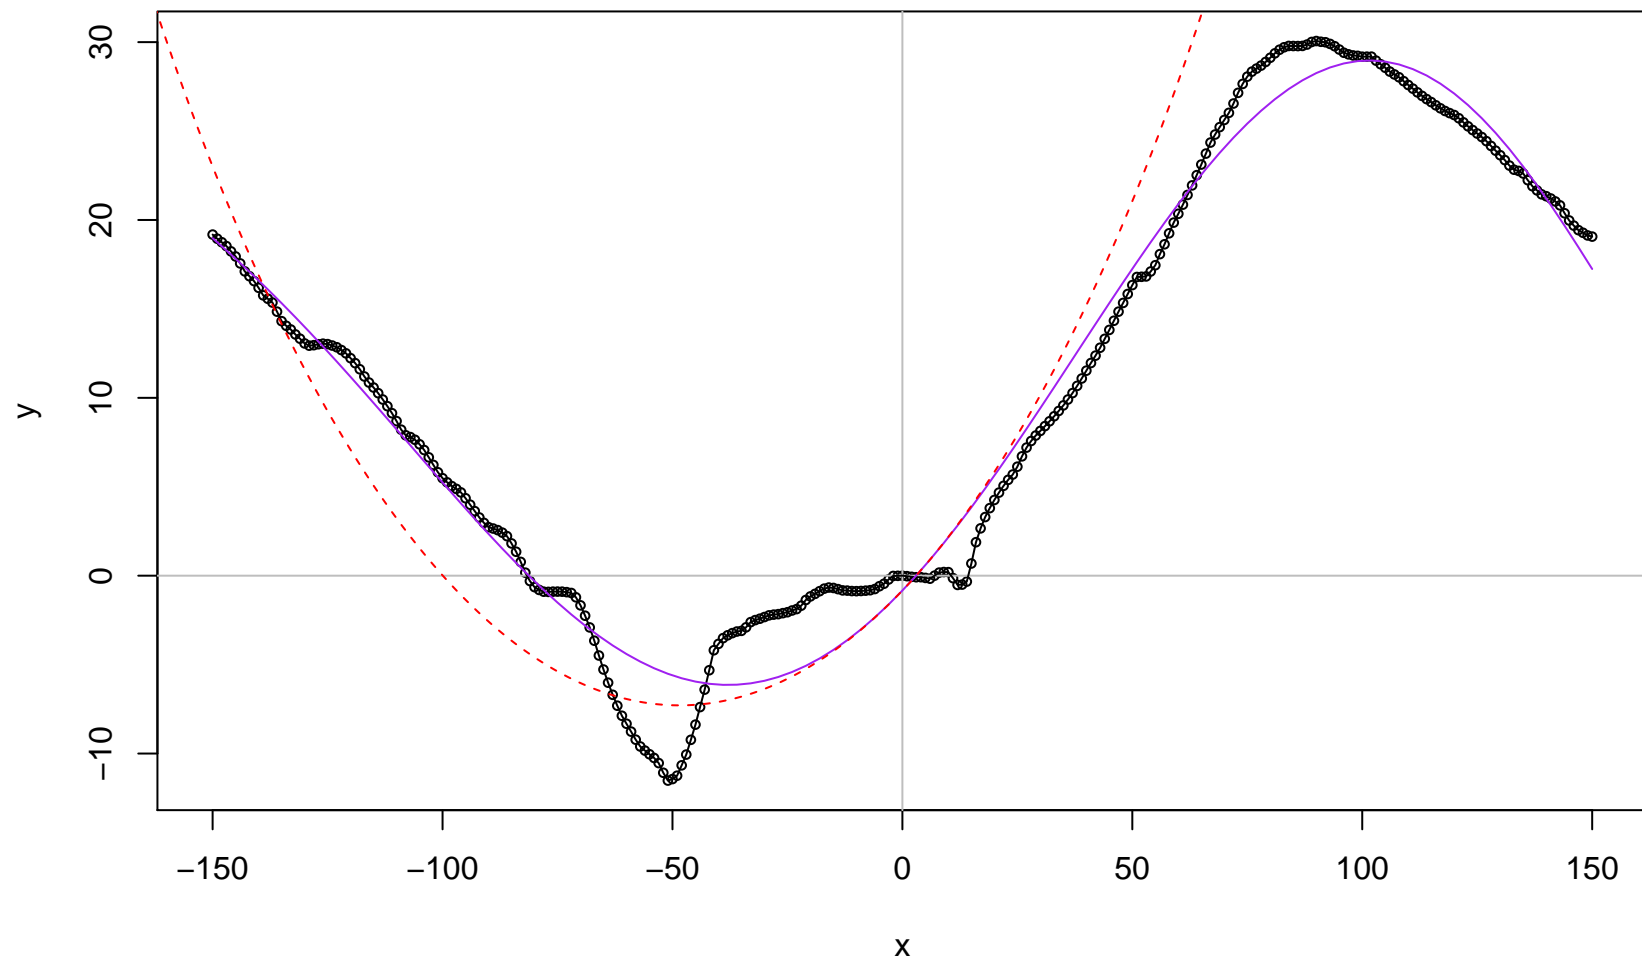

Site 132

$K^*100 = -0.1791$

$R^2 = 0.847$

radius = -558.2249

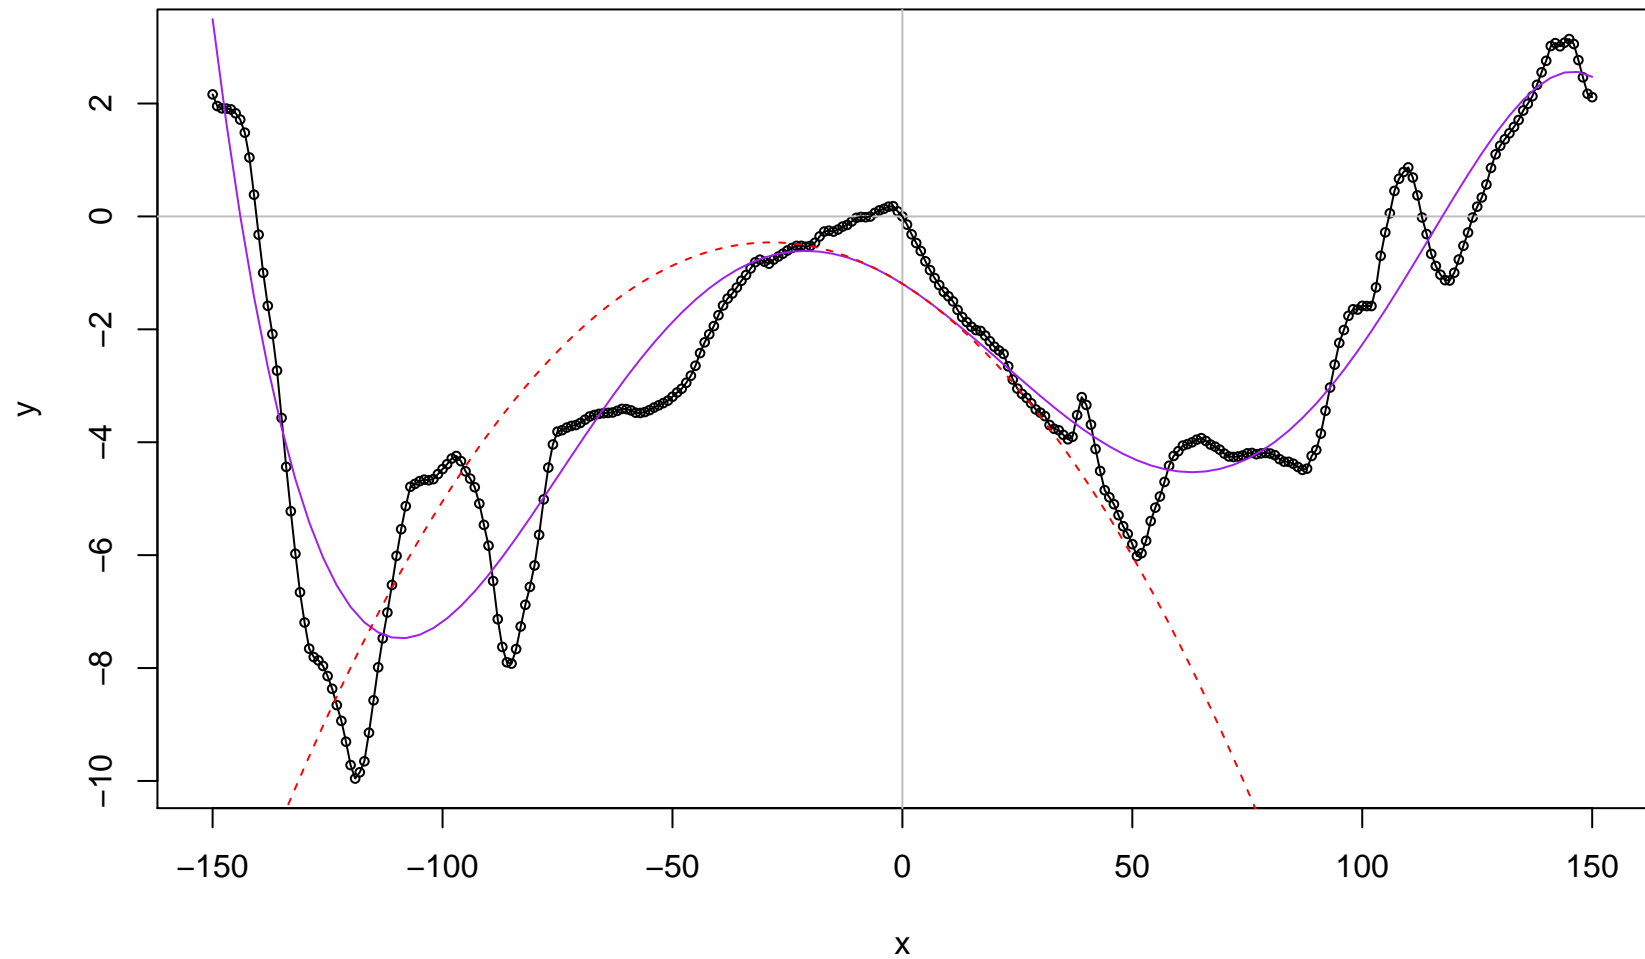

Site 133

$K*100= 0.1798$

$R^2= 0.9935$

radius= 556.3228

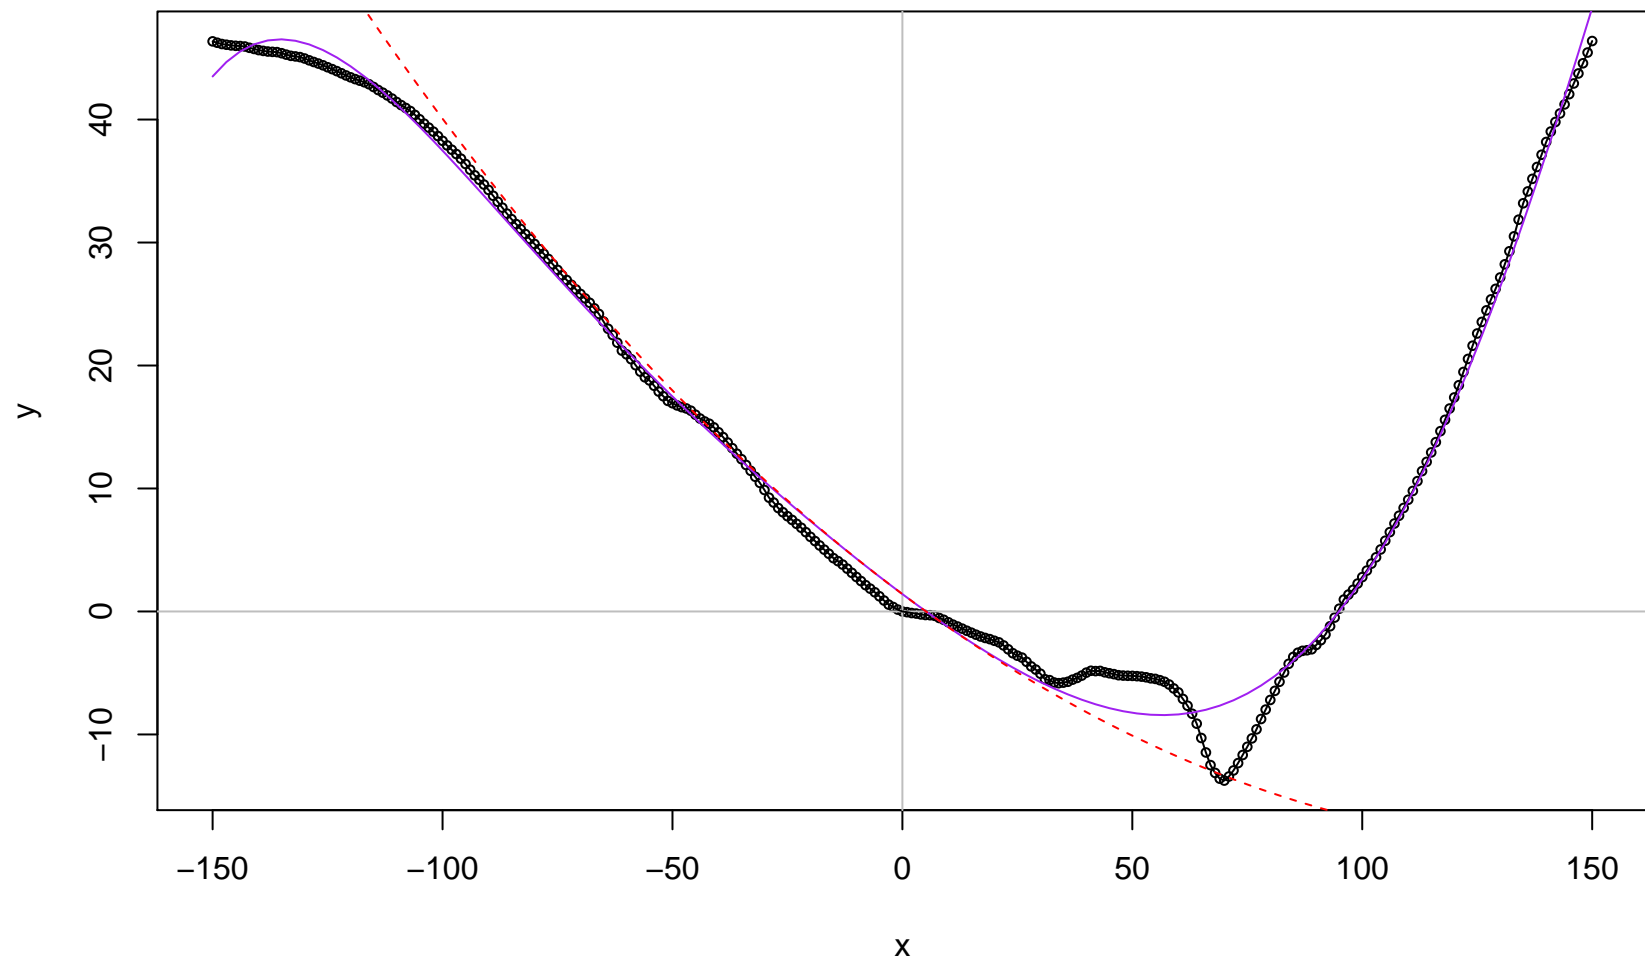

Site 134

$K \cdot 100 = 0.3128$

$R^2 = 0.967$

radius = 319.6868

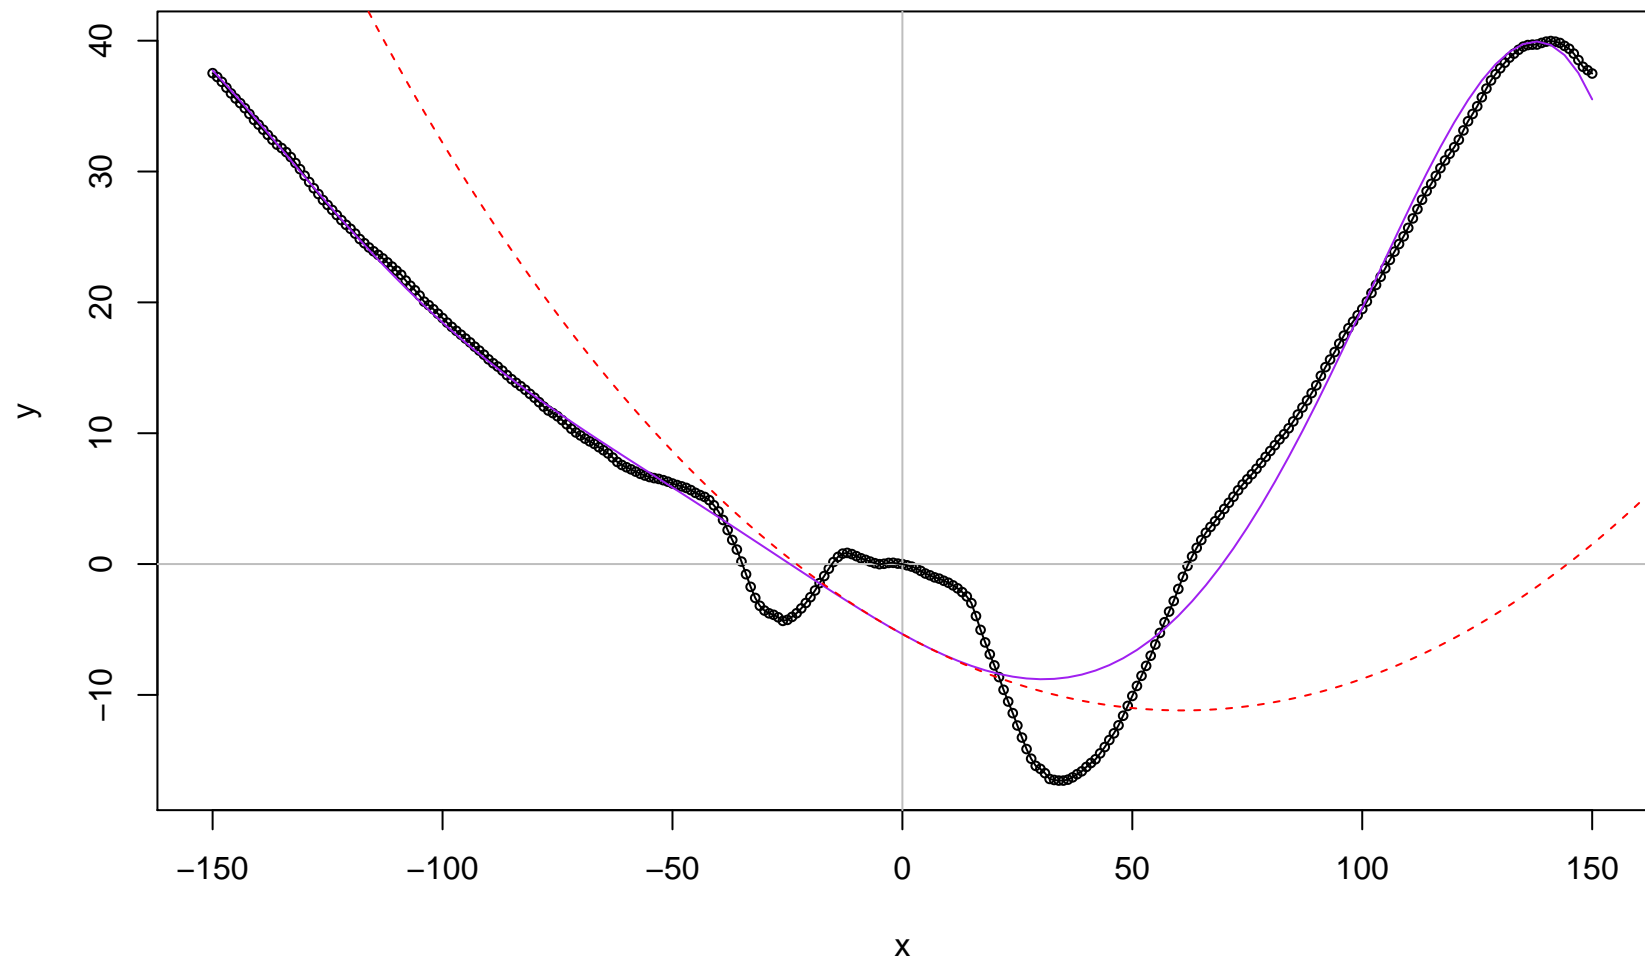

Site 135

$K \cdot 100 = 0.1144$

$R^2 = 0.9964$

radius= 873.9744

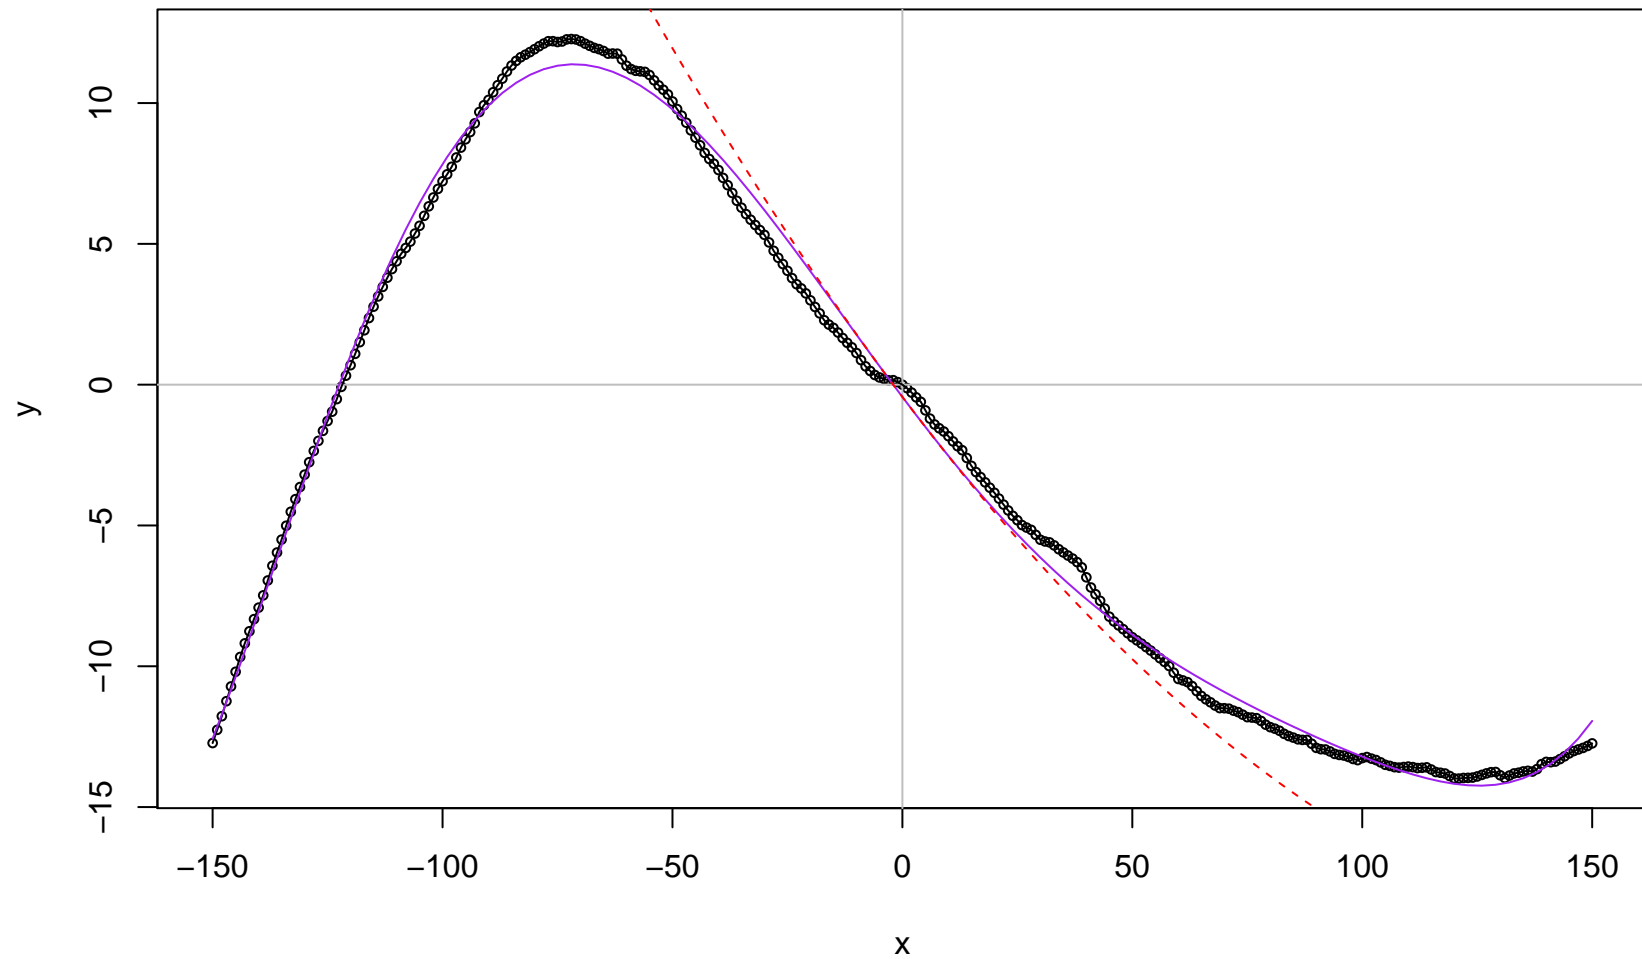

Site 136

$K*100 = -0.2264$

$R^2 = 0.9511$

radius =  $-441.6639$

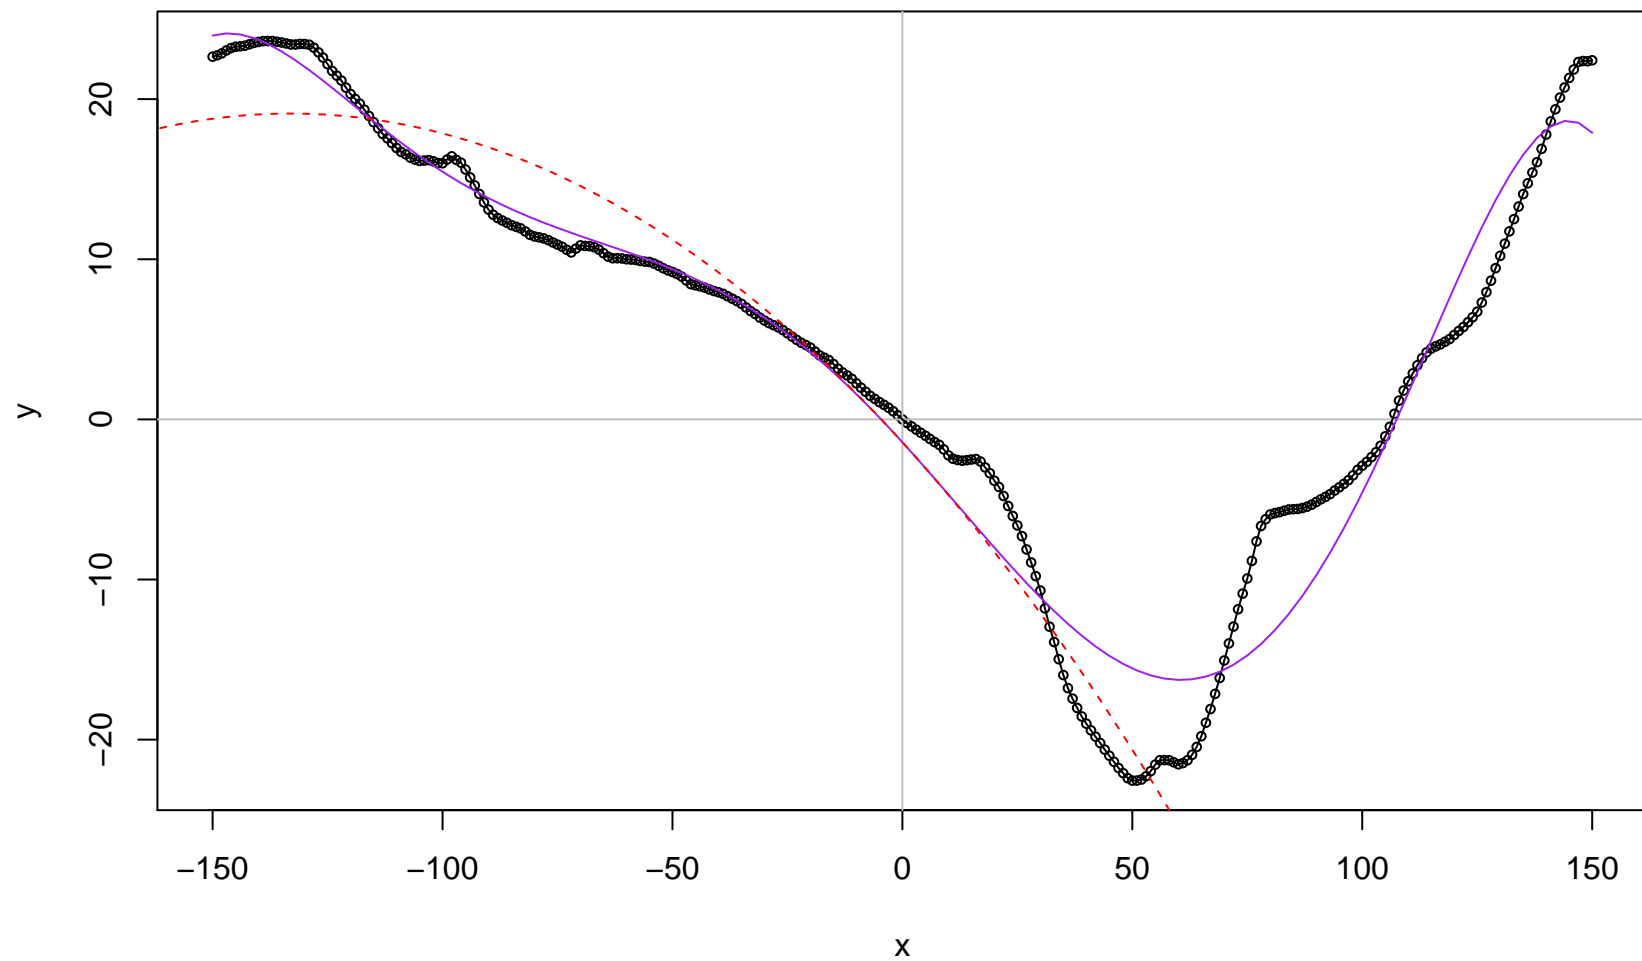



Site 137

$K*100= 0.3903$

$R^2= 0.9758$

radius= 256.2315

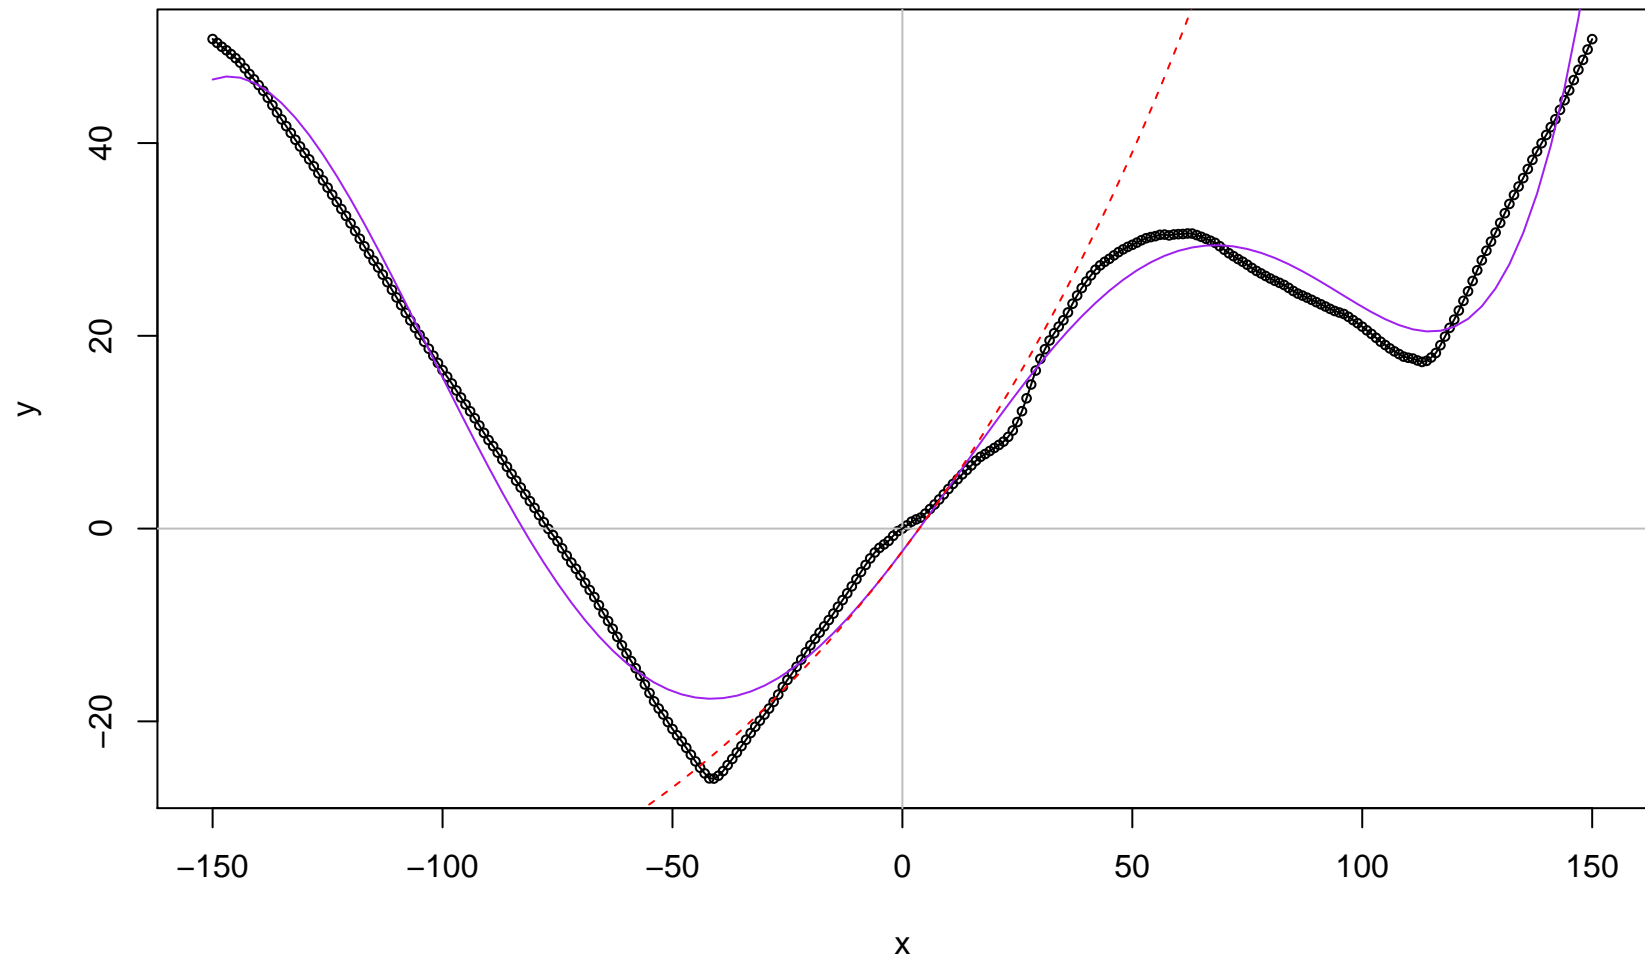

Site 138

$K*100= 1.3972$

$R^2= 0.9966$

radius= 71.5702

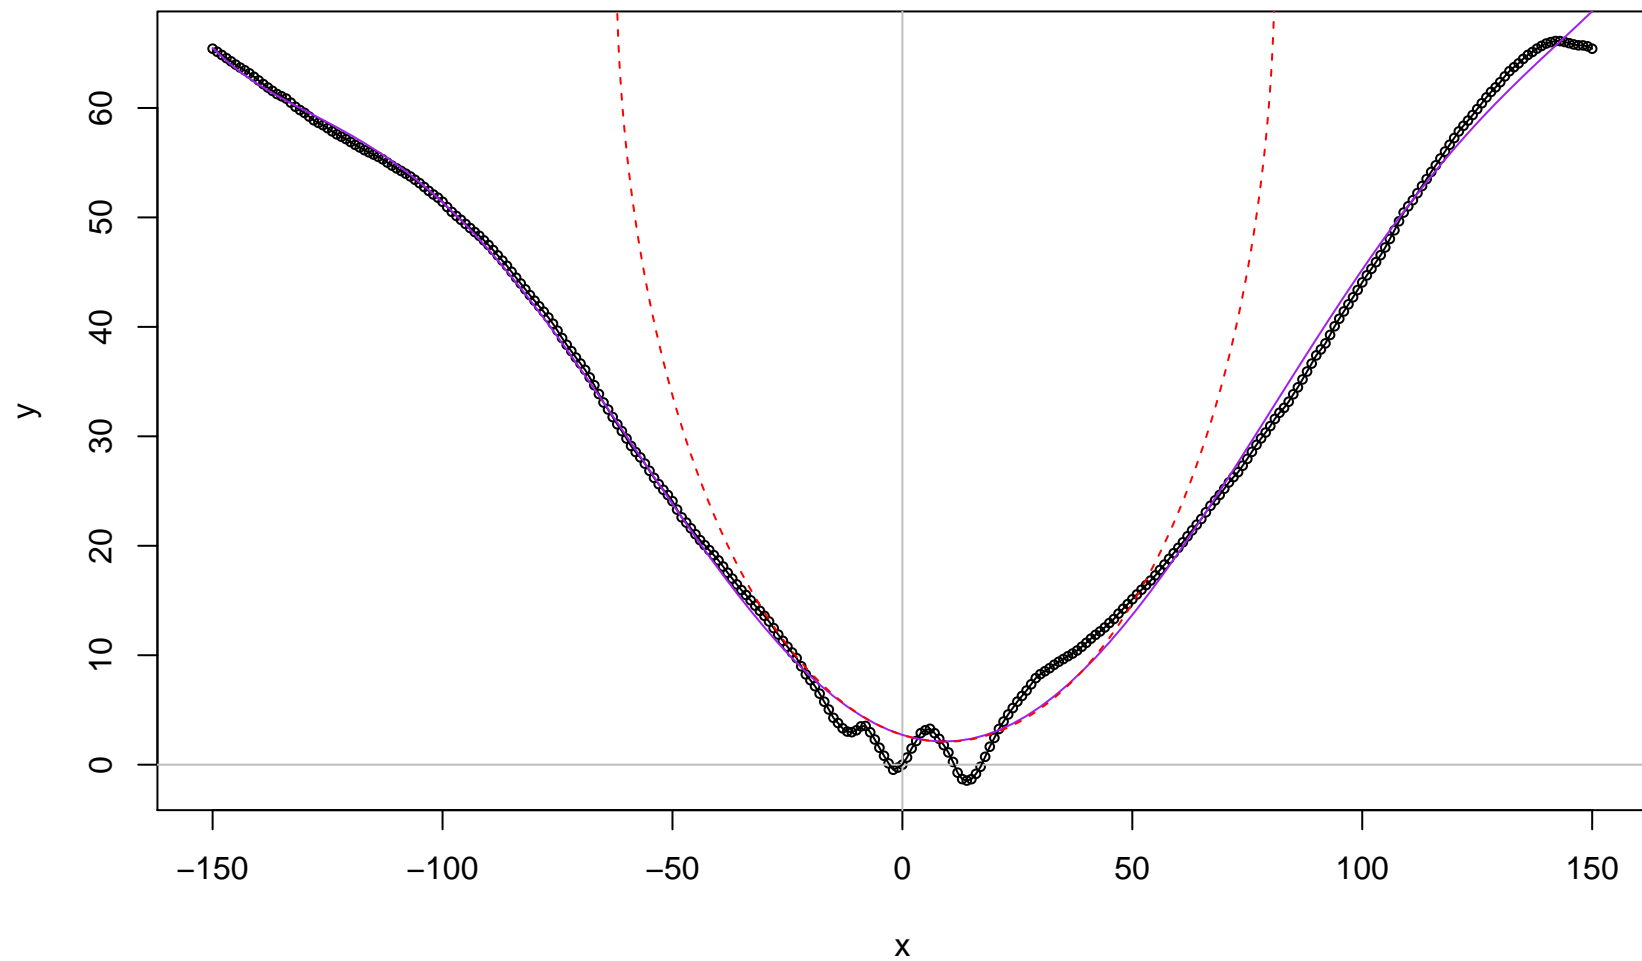

Site 139

$K*100= 2.1118$

$R^2= 0.9931$

radius= 47.3526

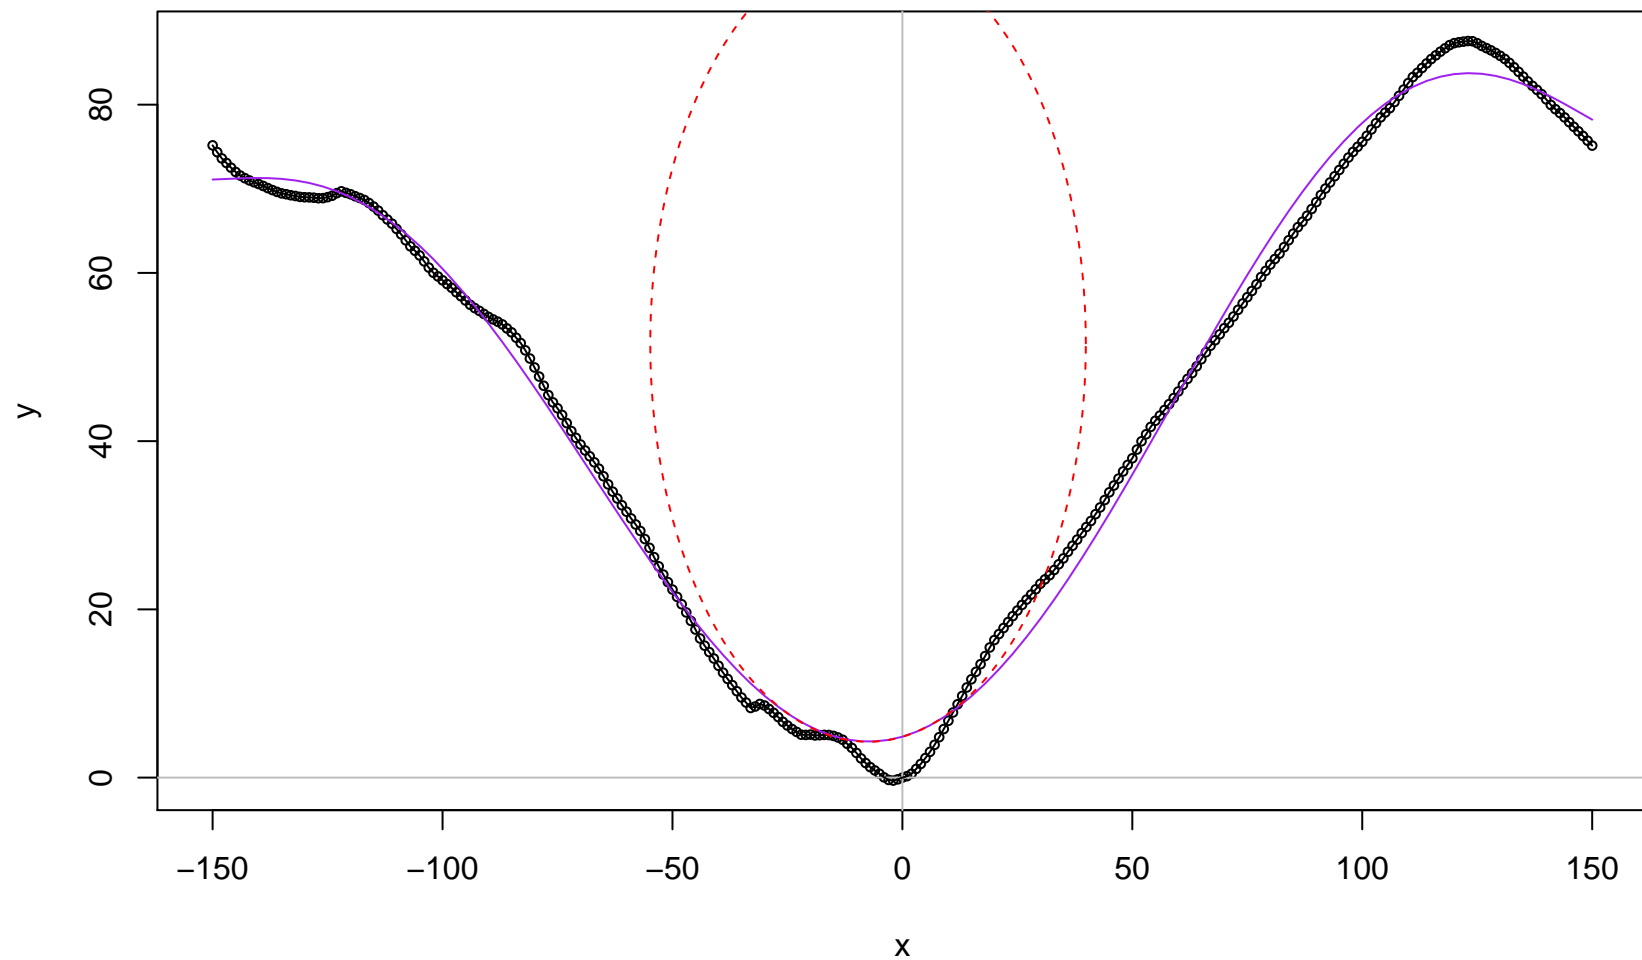

Site 140

$K*100= 1.9845$

$R^2= 0.9926$

radius= 50.3912

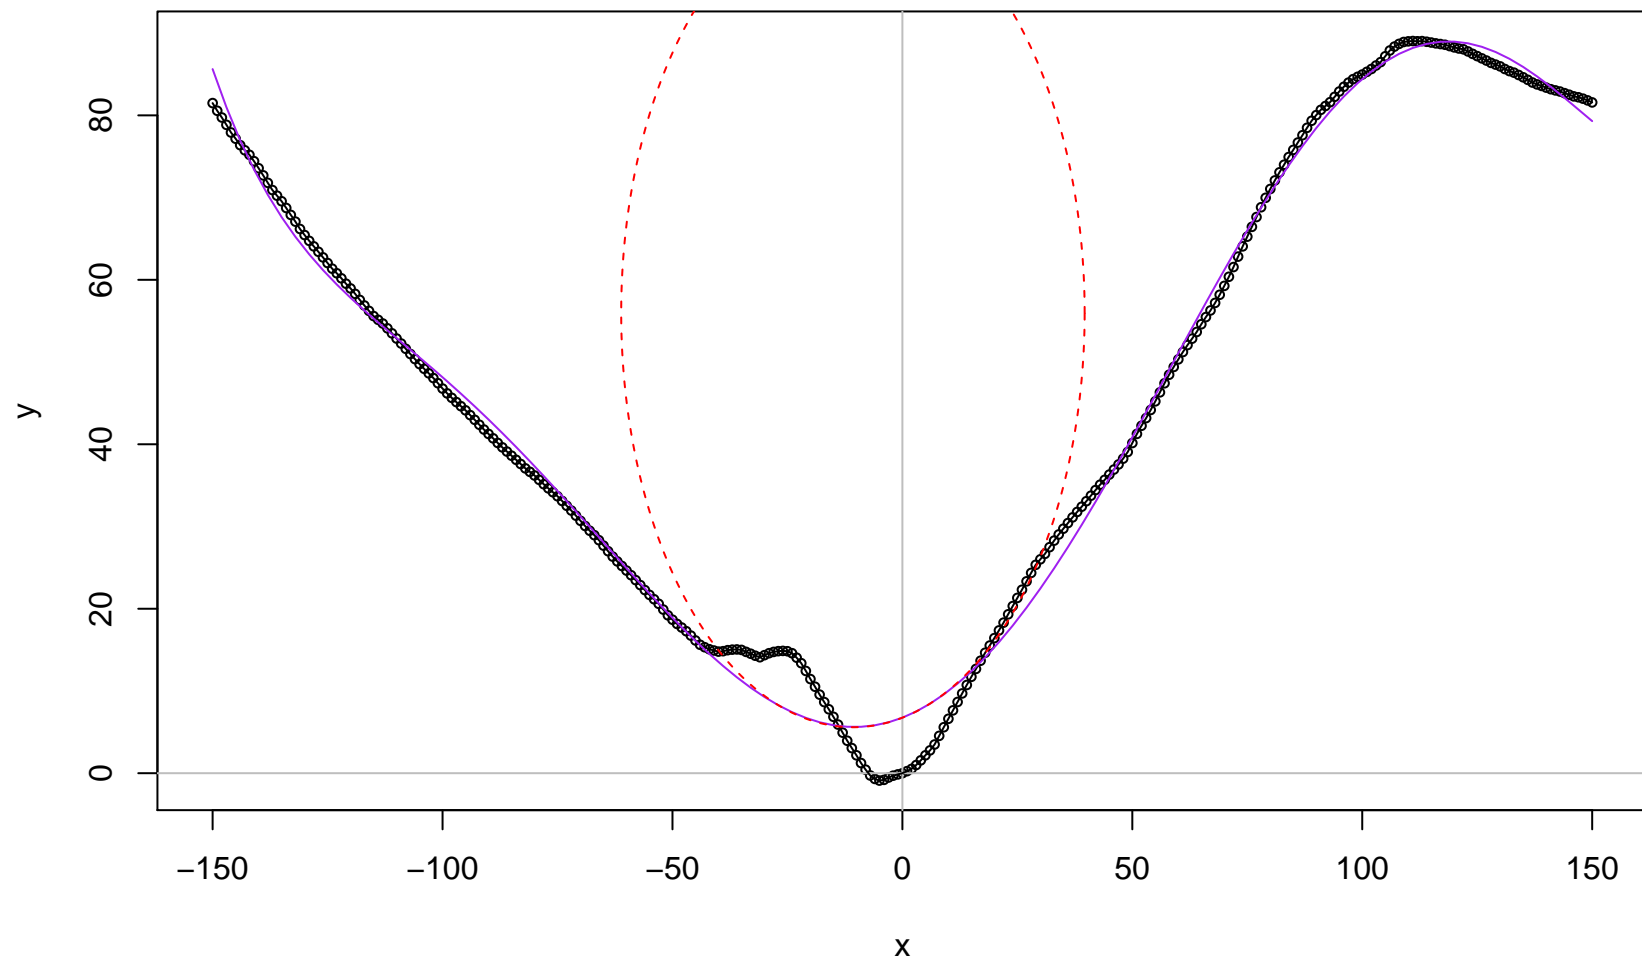

Site 141

$K \cdot 100 = 1.161$

$R^2 = 0.9921$

radius = 86.1306

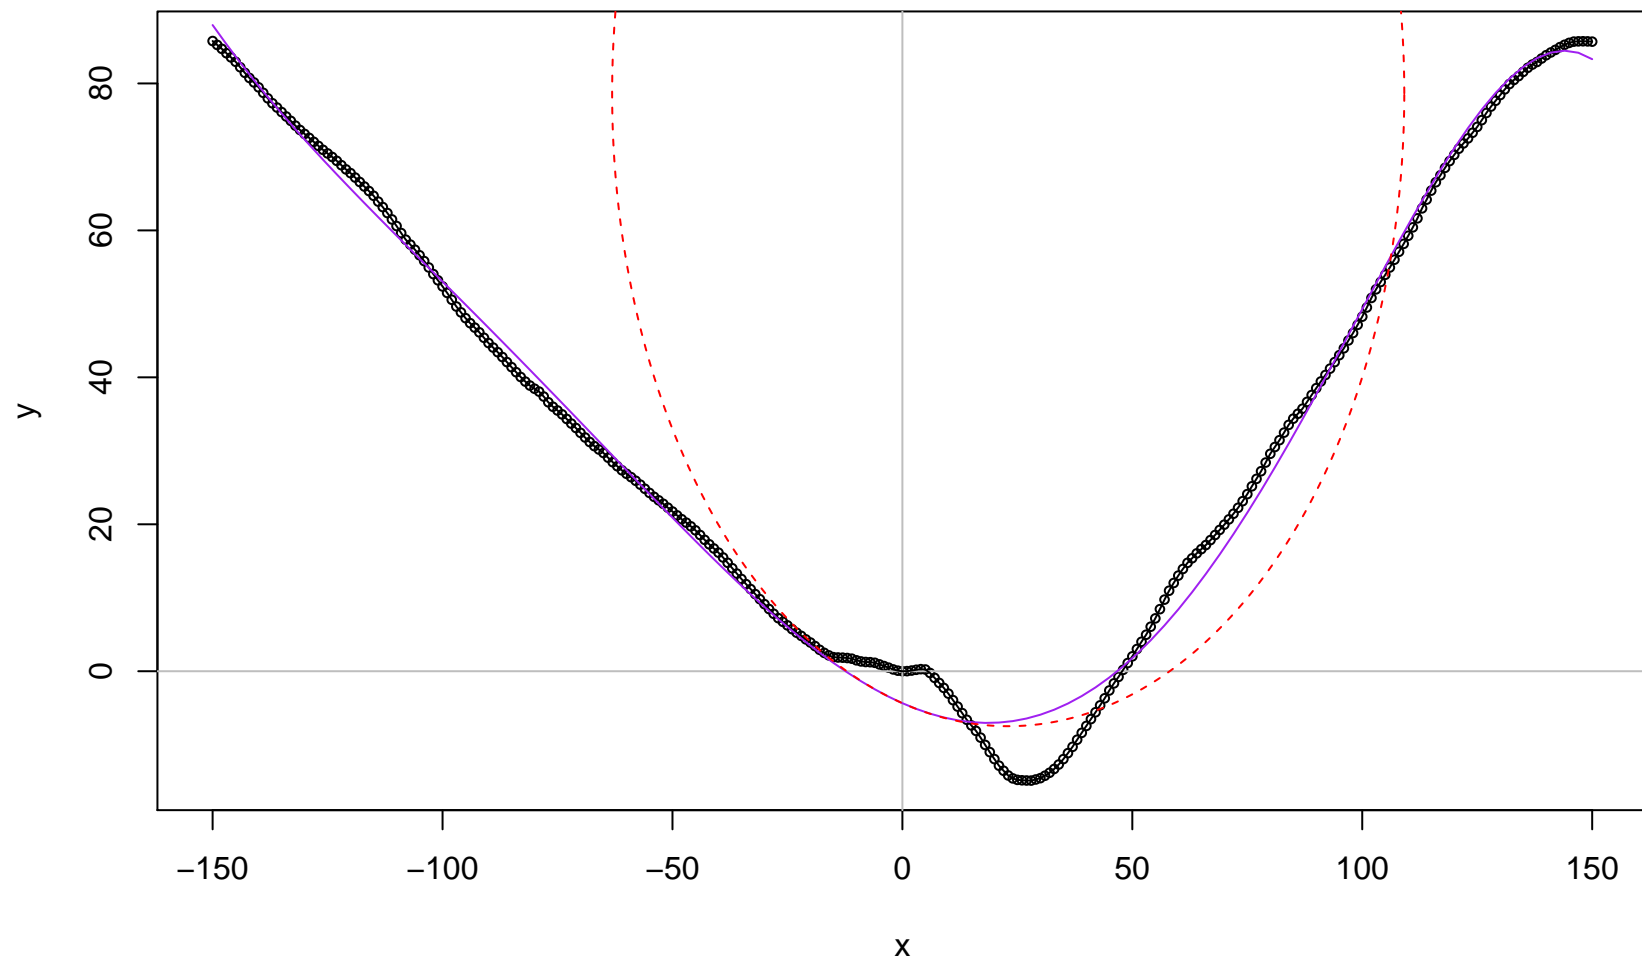

Site 142

$K*100 = -0.0253$

$R^2 = 0.9712$

radius = -3951.6894

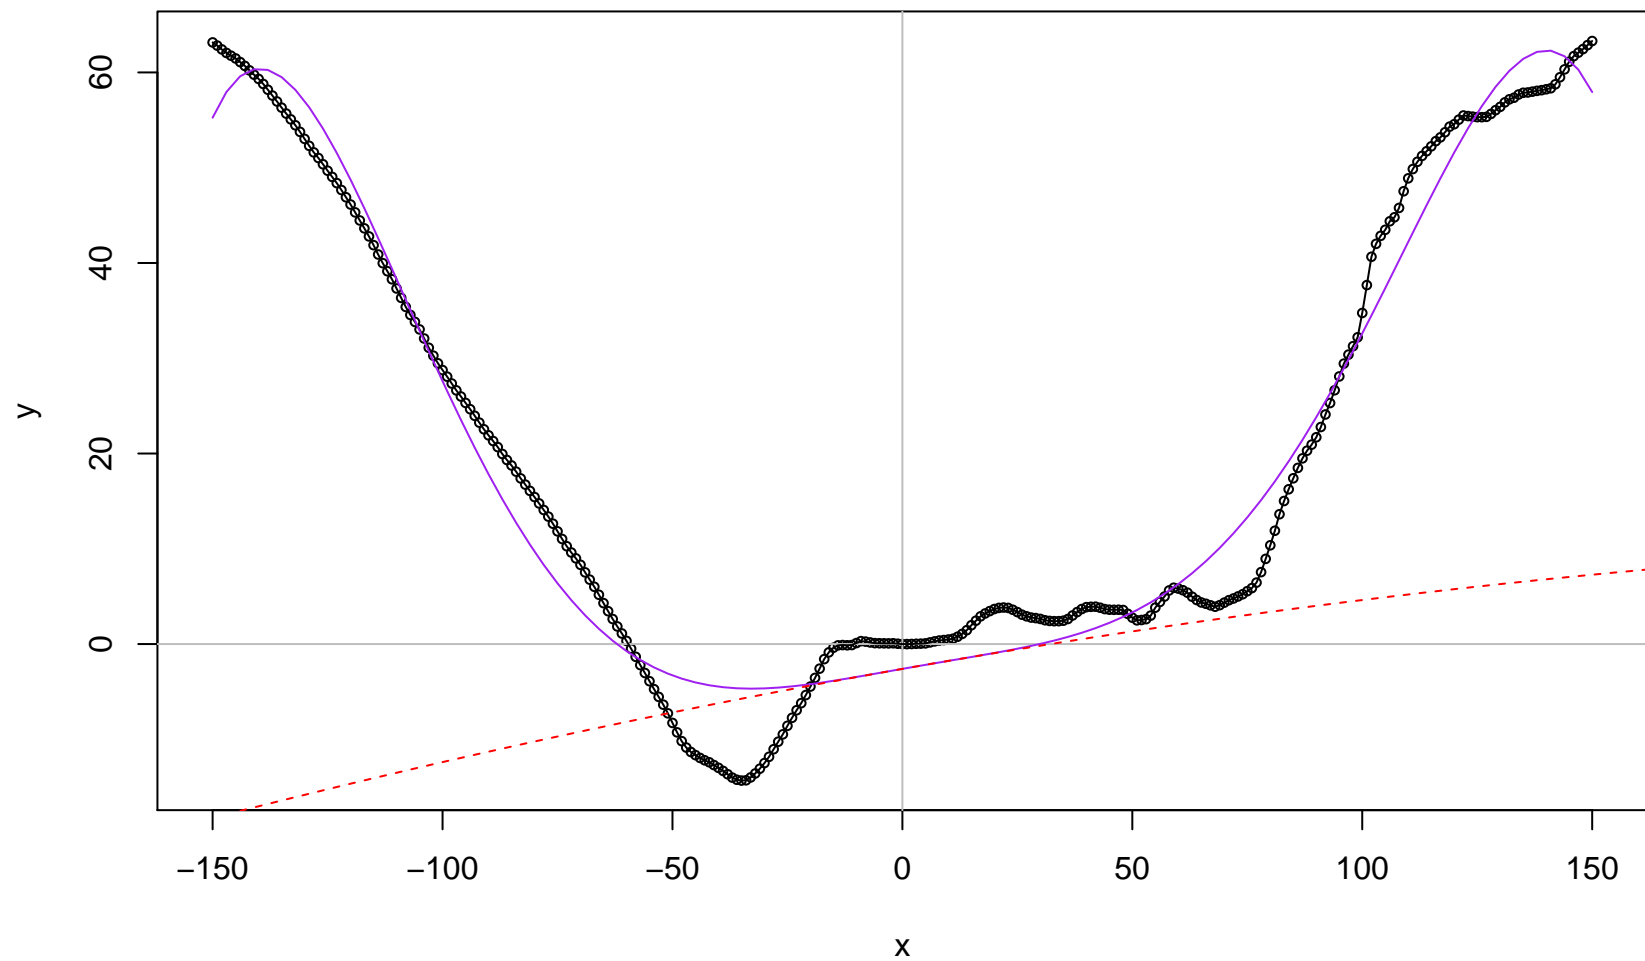

Site 143

$K*100= 1.7392$

$R^2= 0.9782$

radius= 57.4962

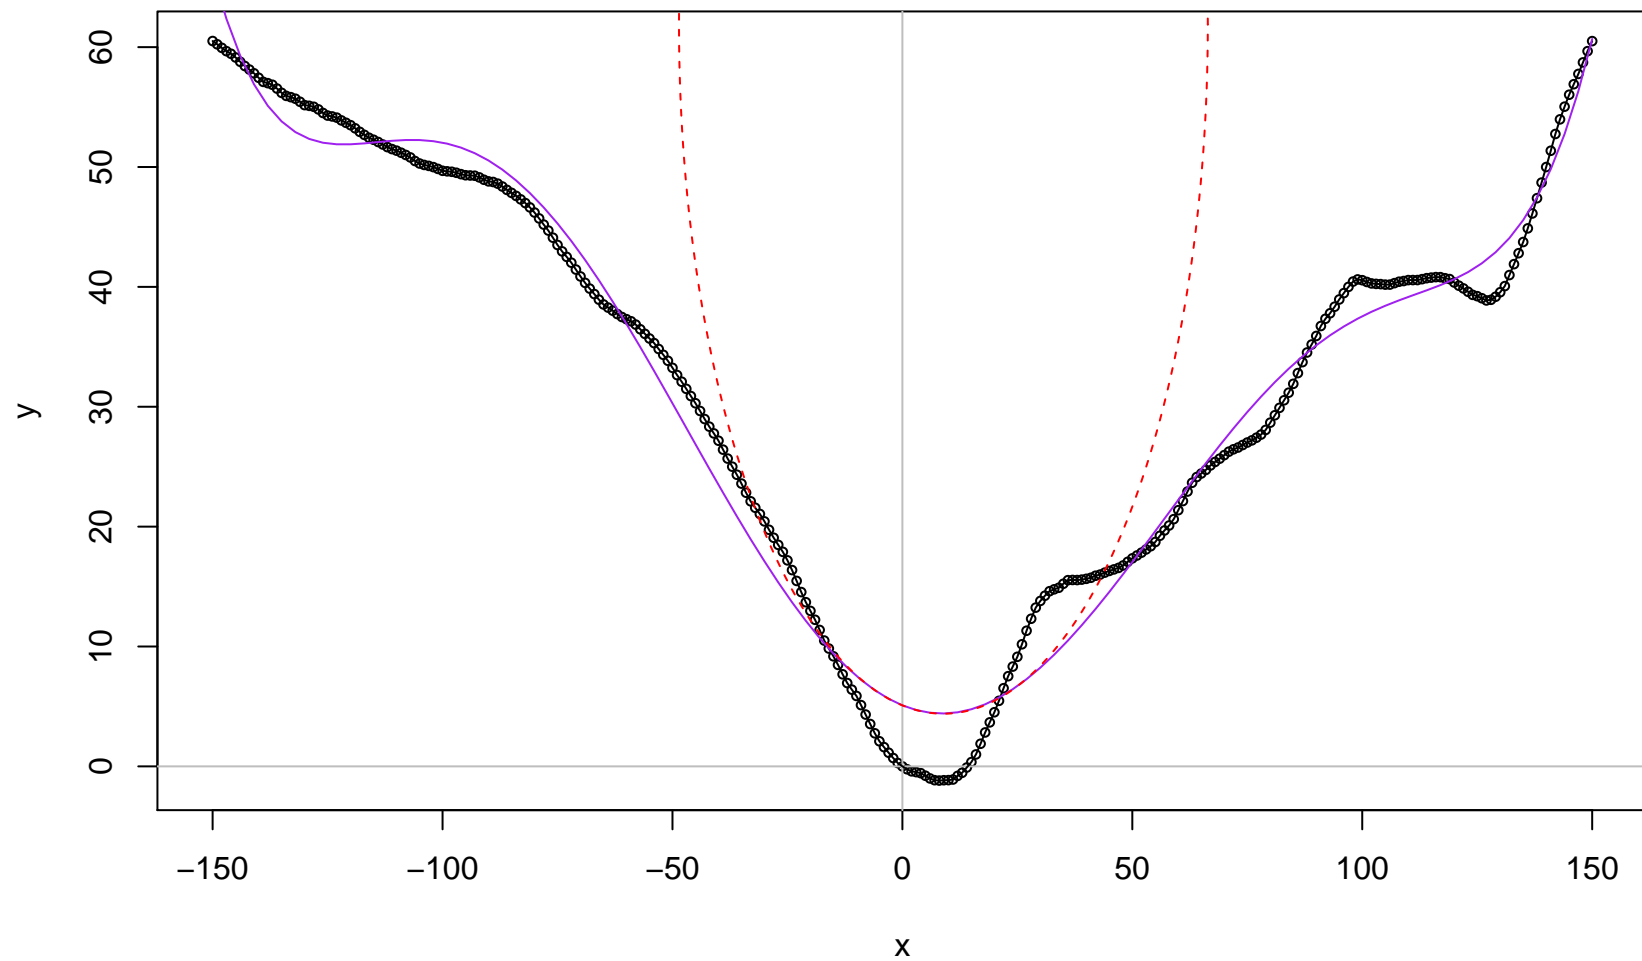

Site 144

$K \cdot 100 = 2.1278$

$R^2 = 0.985$

radius = 46.9978

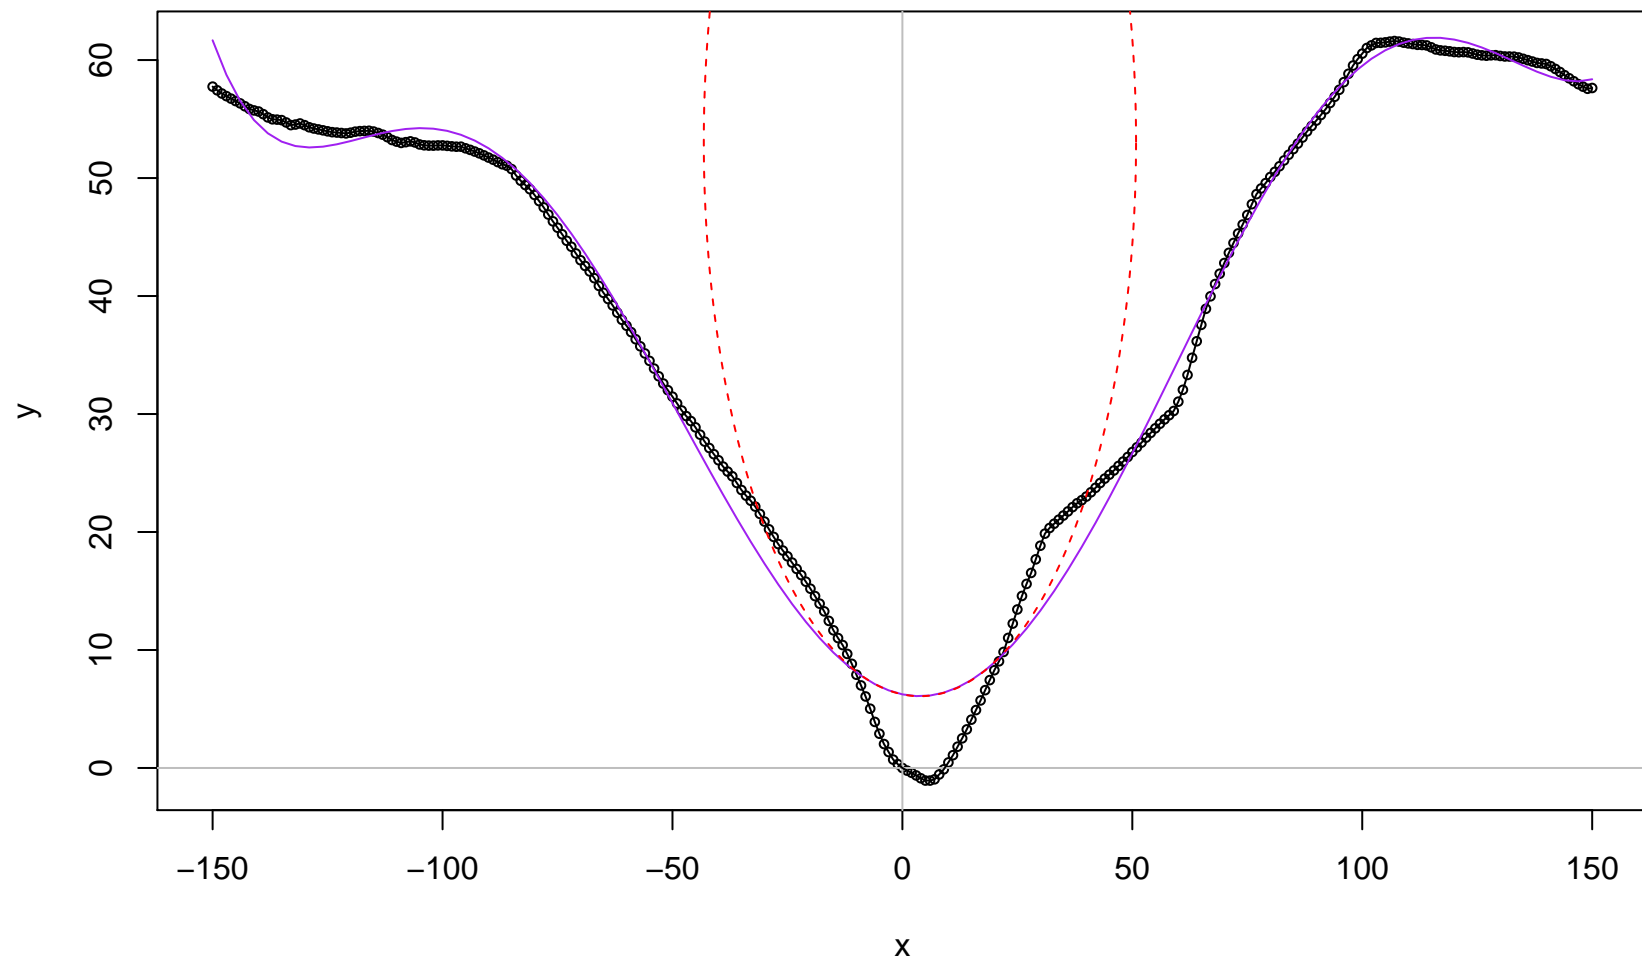



Site 145

$K*100= 1.3853$

$R^2= 0.9539$

radius= 72.1871

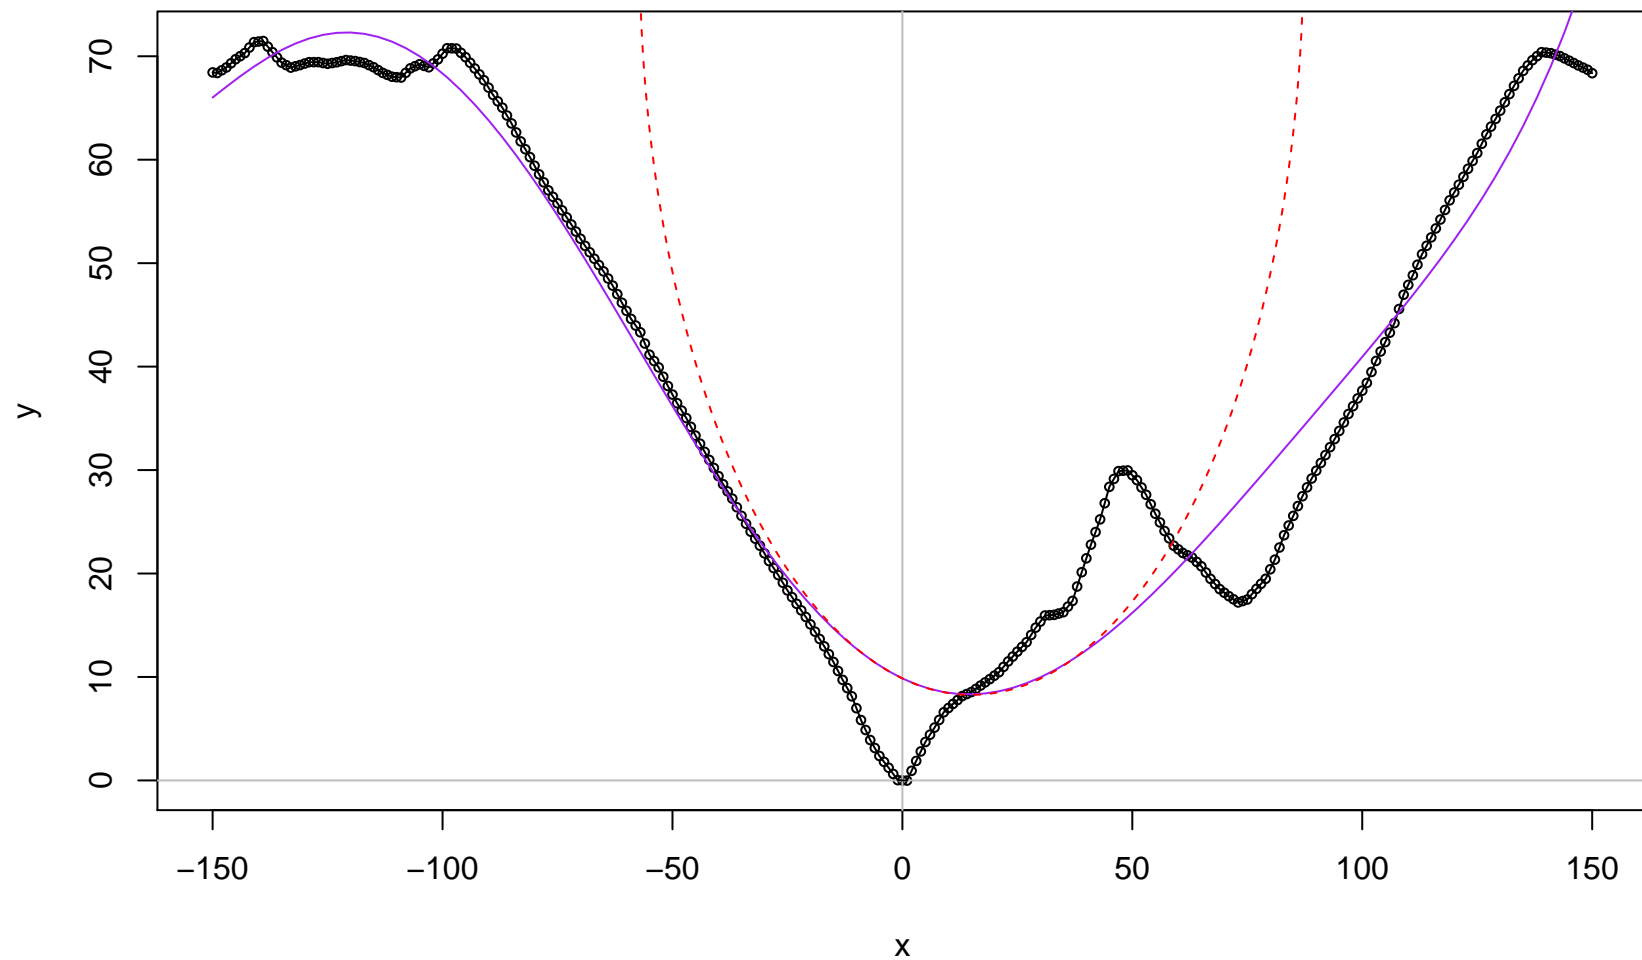

Site 146

$K \cdot 100 = 0.5009$

$R^2 = 0.9901$

radius= 199.6463

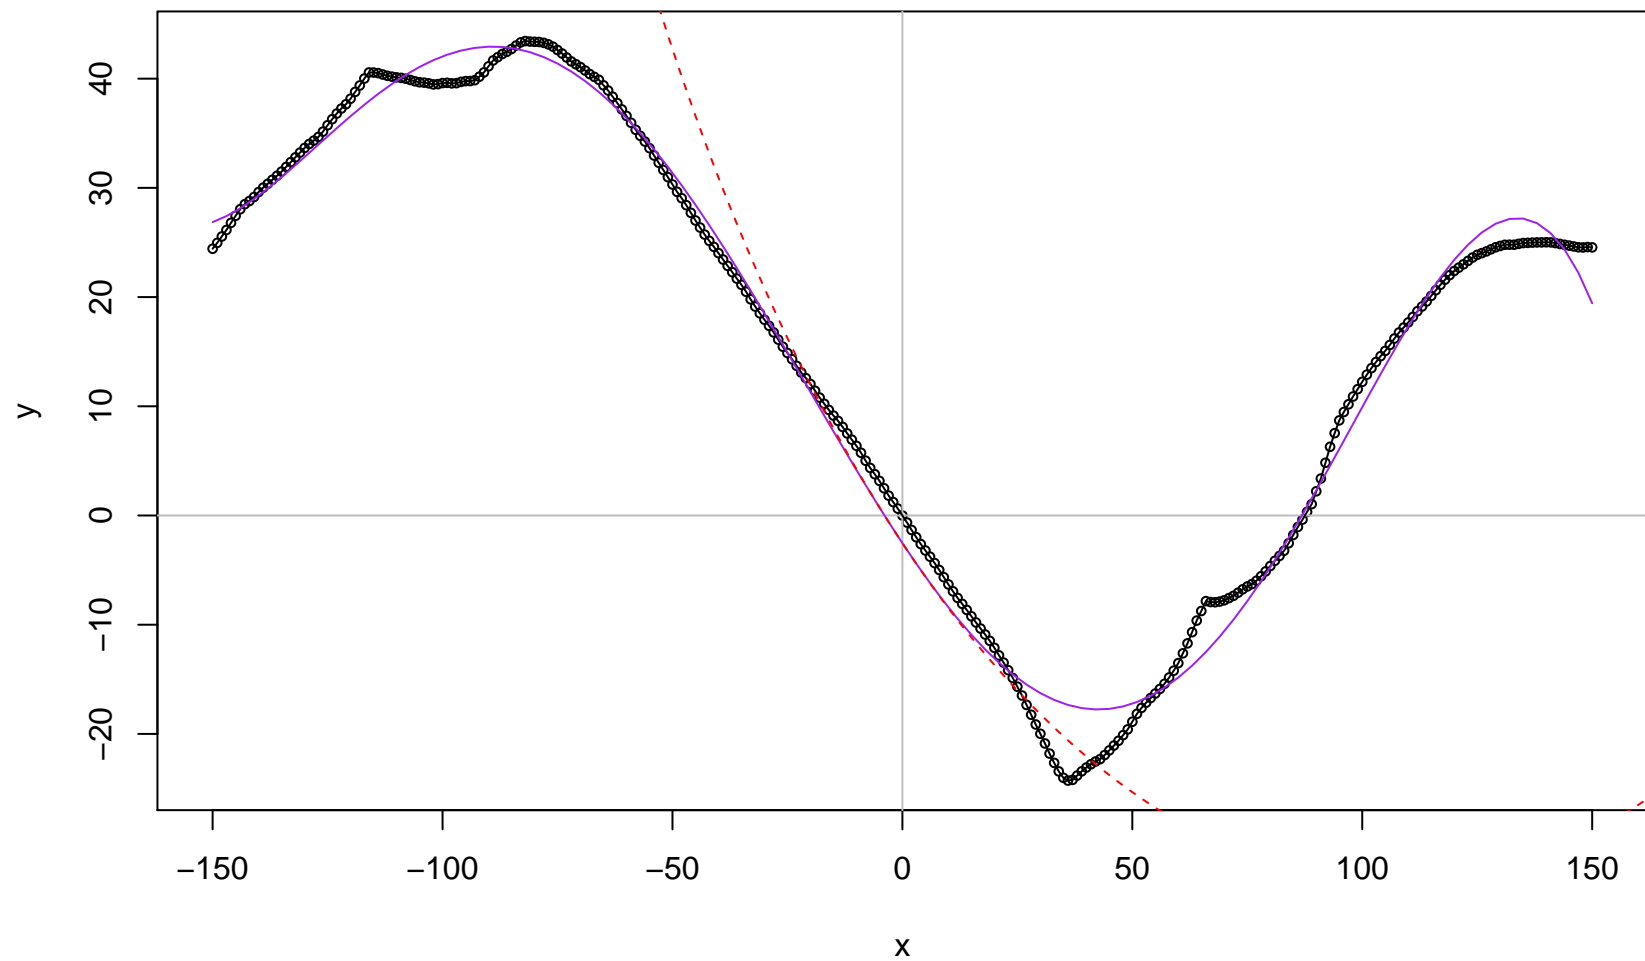

Site 147

$K \cdot 100 = -0.3978$

$R^2 = 0.9988$

radius =  $-251.3761$

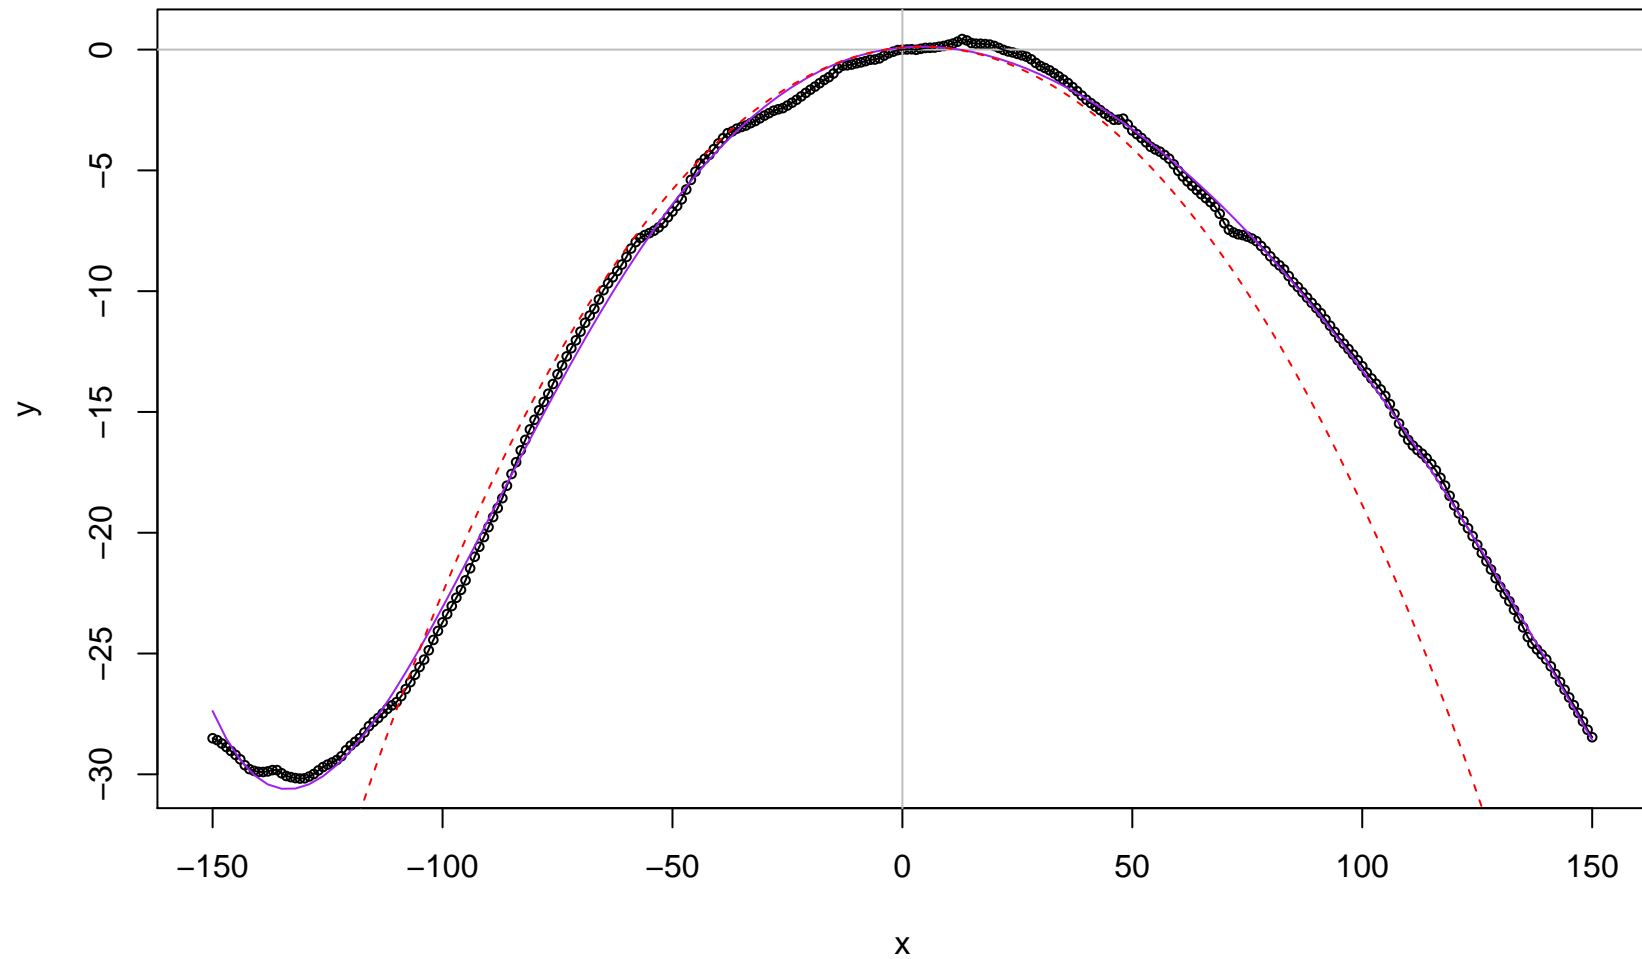

Site 148

$K^*100 = -0.0891$

$R^2 = 0.9618$

radius = -1122.6841

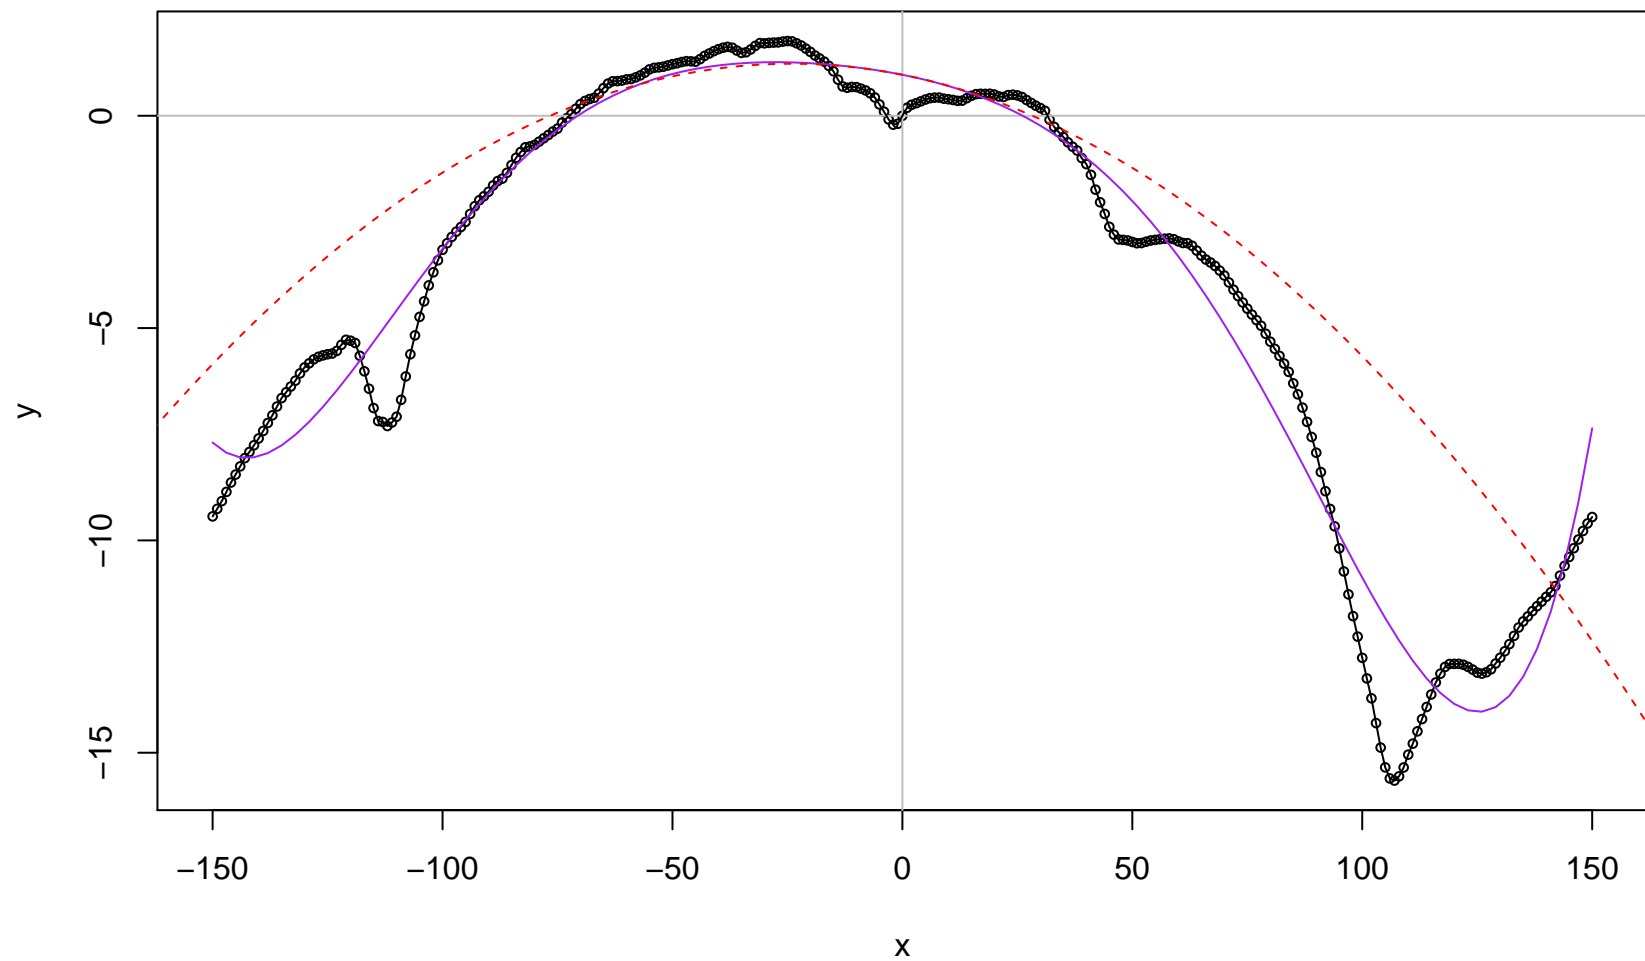

Site 149

$K*100 = -0.4762$

$R^2 = 0.9363$

radius =  $-209.9988$

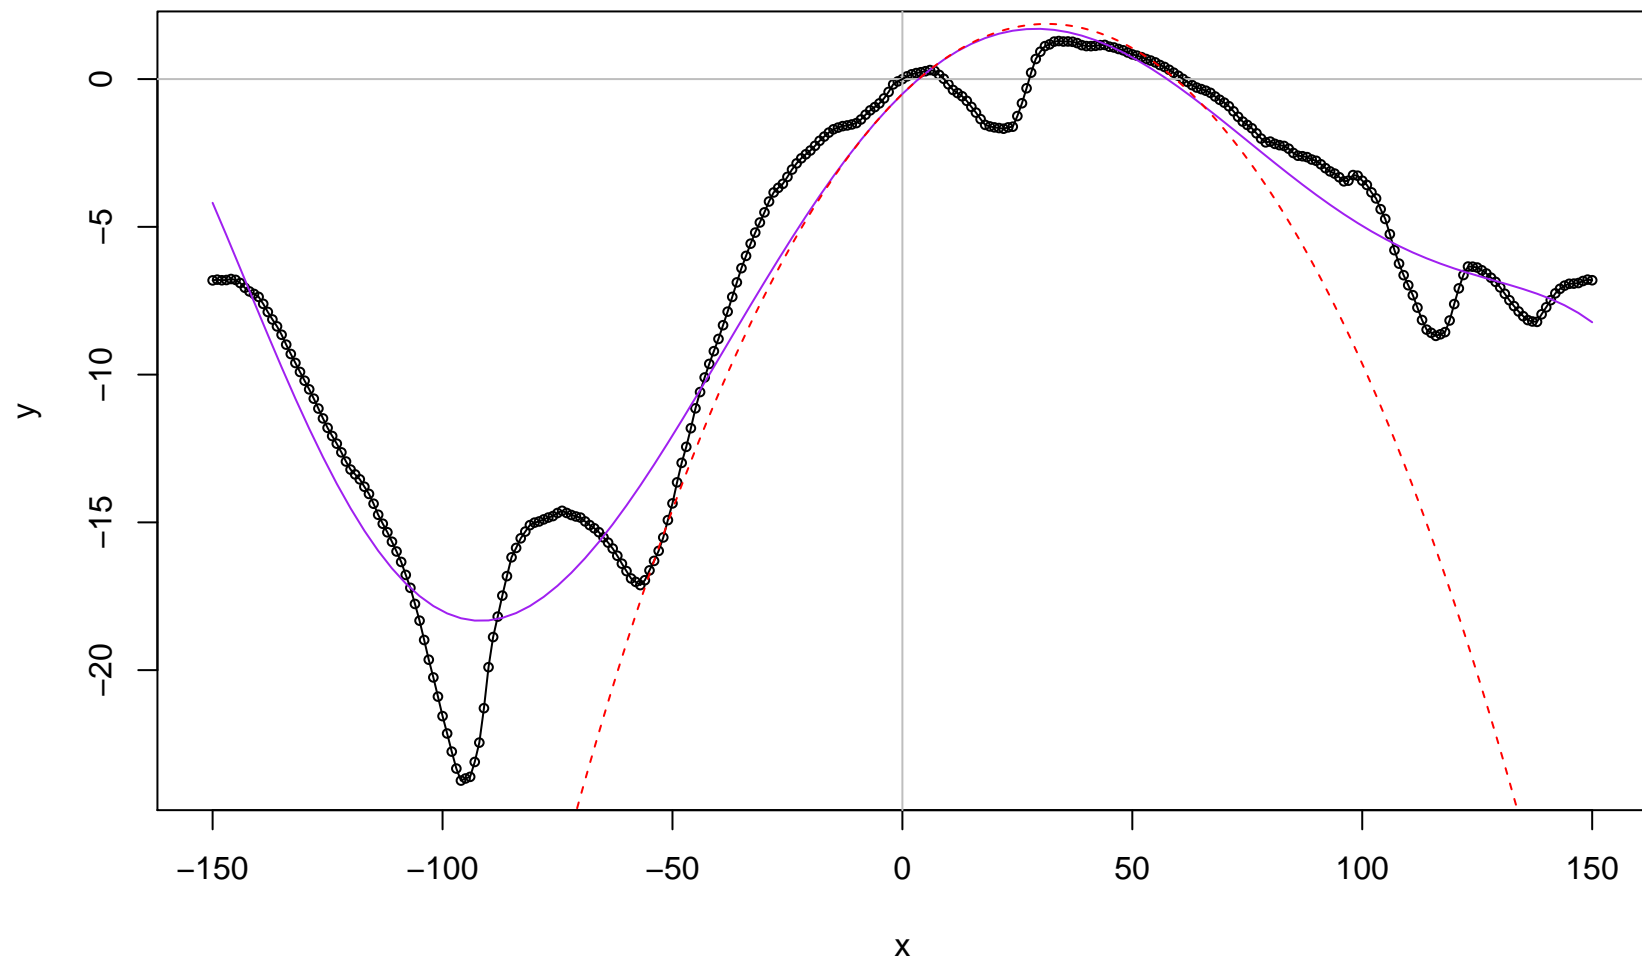

Site 150

$K*100 = -0.32$

$R^2 = 0.9873$

radius = -312.5245

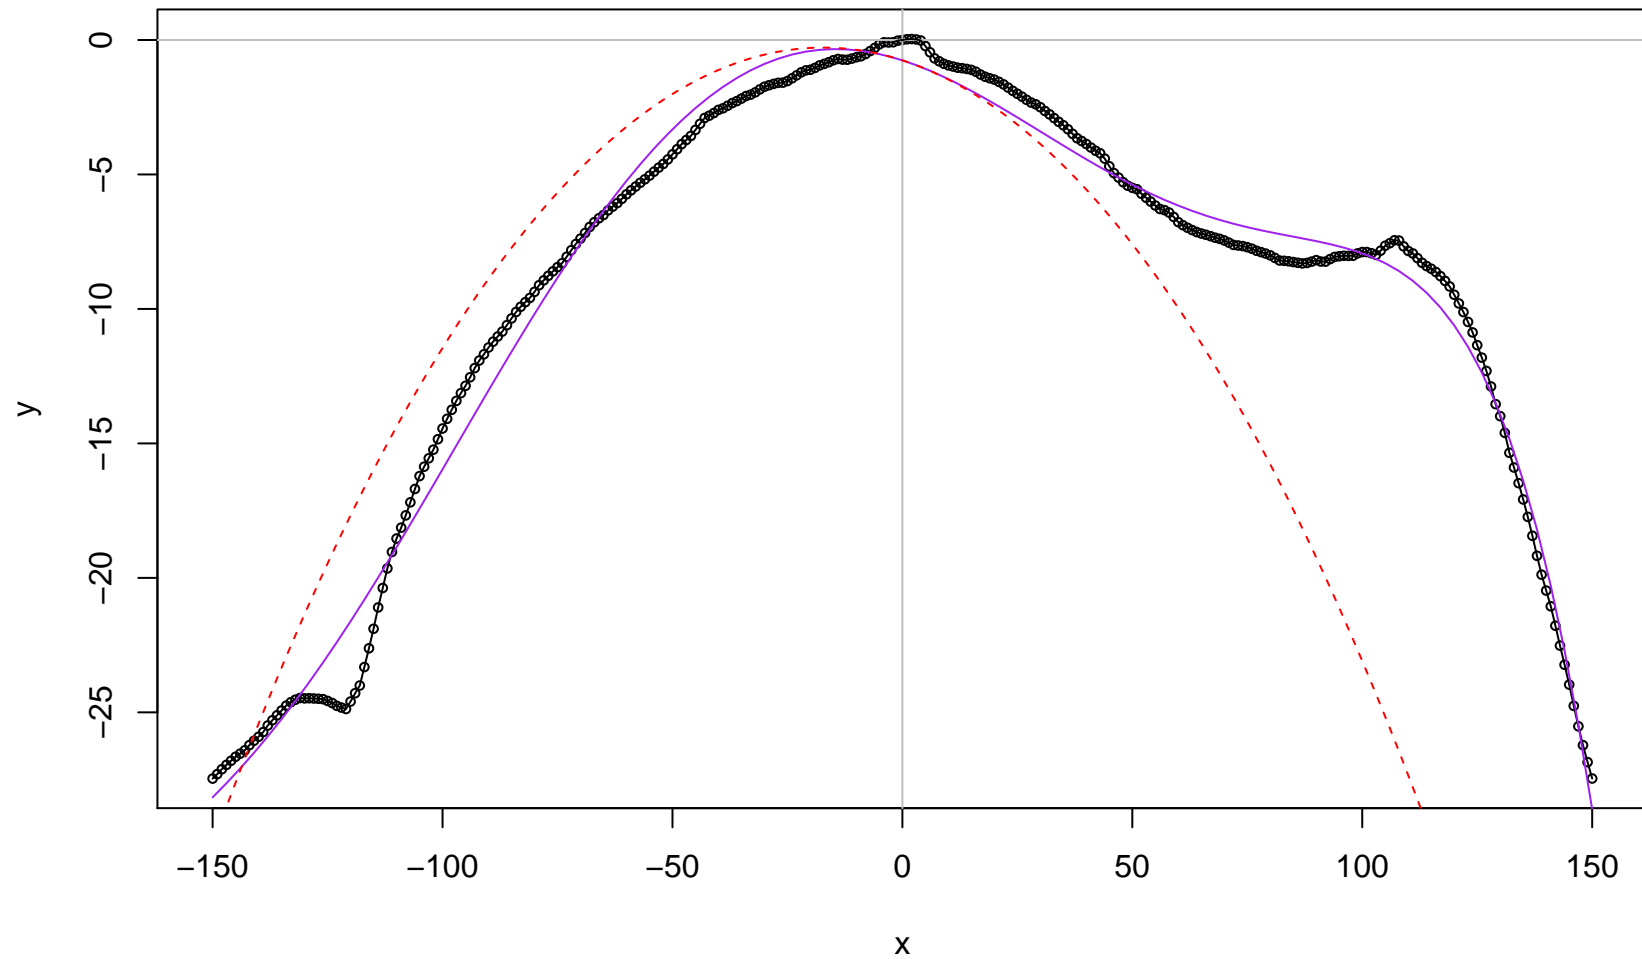

Site 151

$K*100 = -0.1299$

$R^2 = 0.9817$

radius= -769.8726

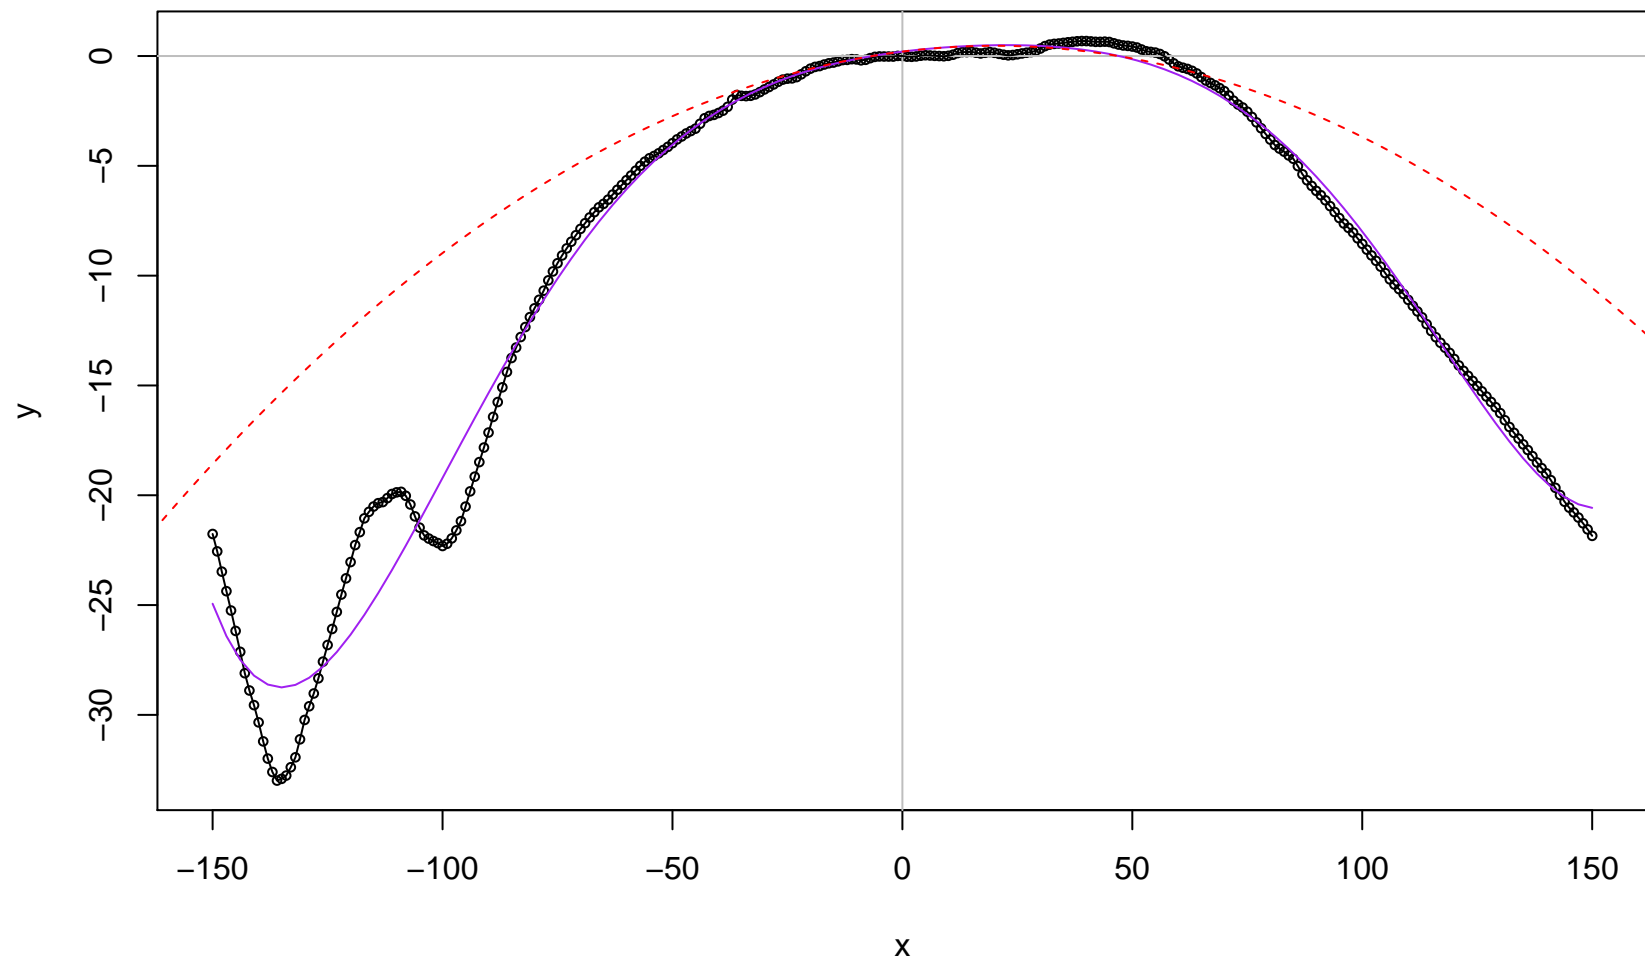

Site 152

$K*100 = -0.4236$

$R^2 = 0.997$

radius = -236.061

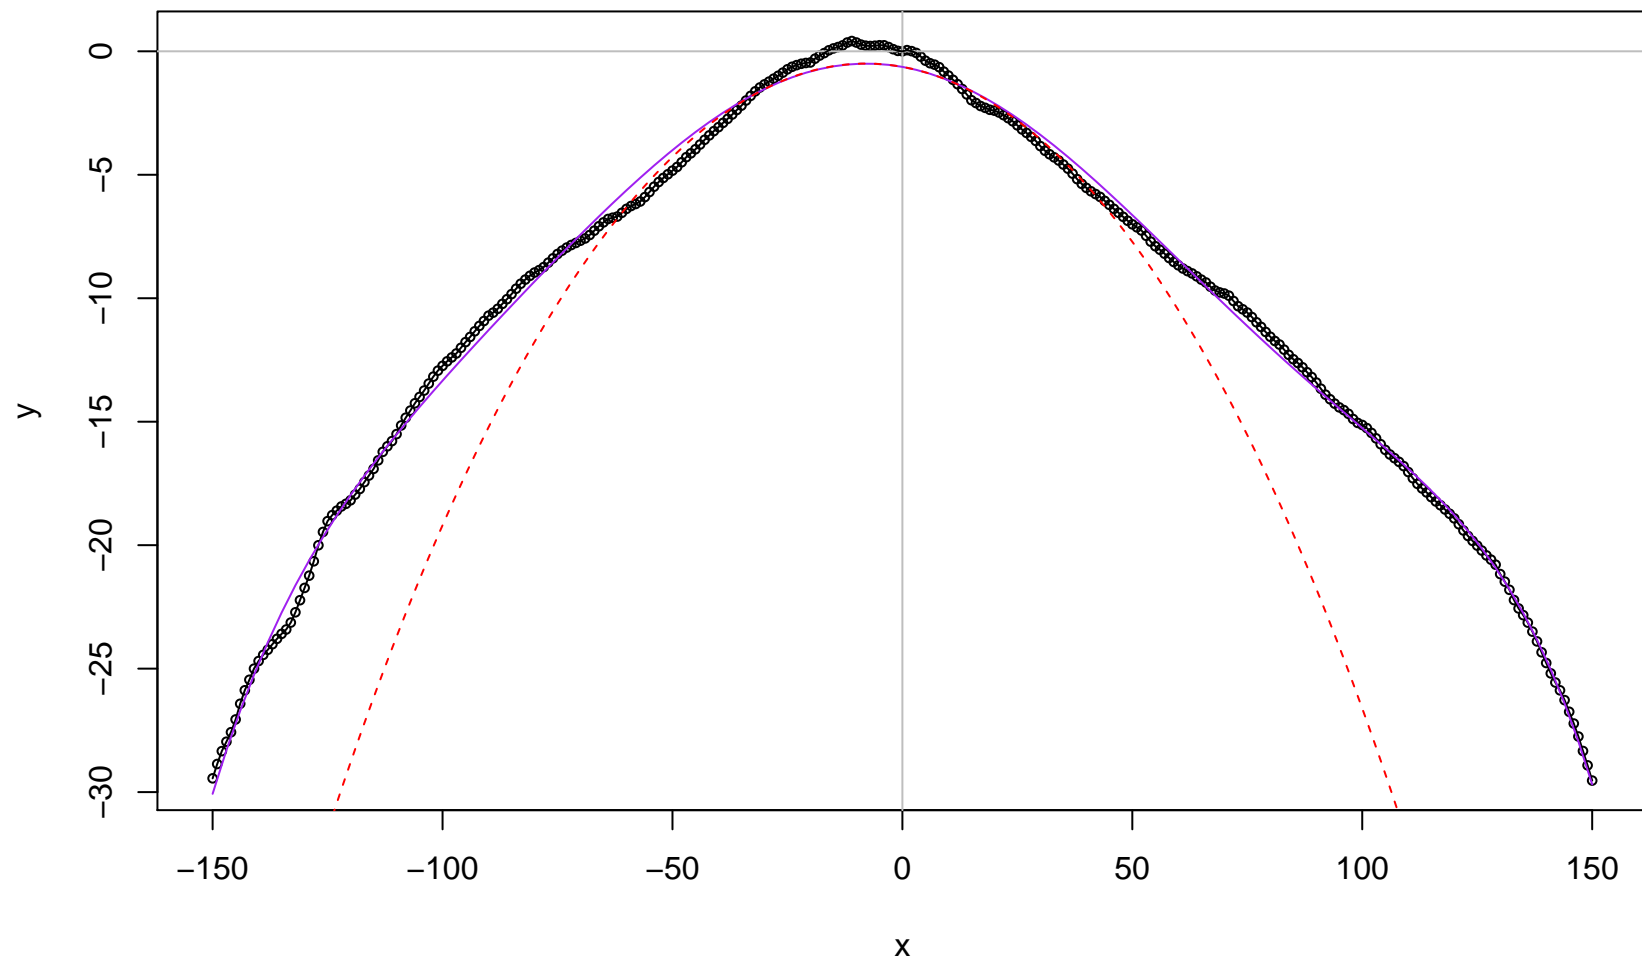



Site 153

$K \cdot 100 = -0.3477$

$R^2 = 0.9986$

radius =  $-287.5697$

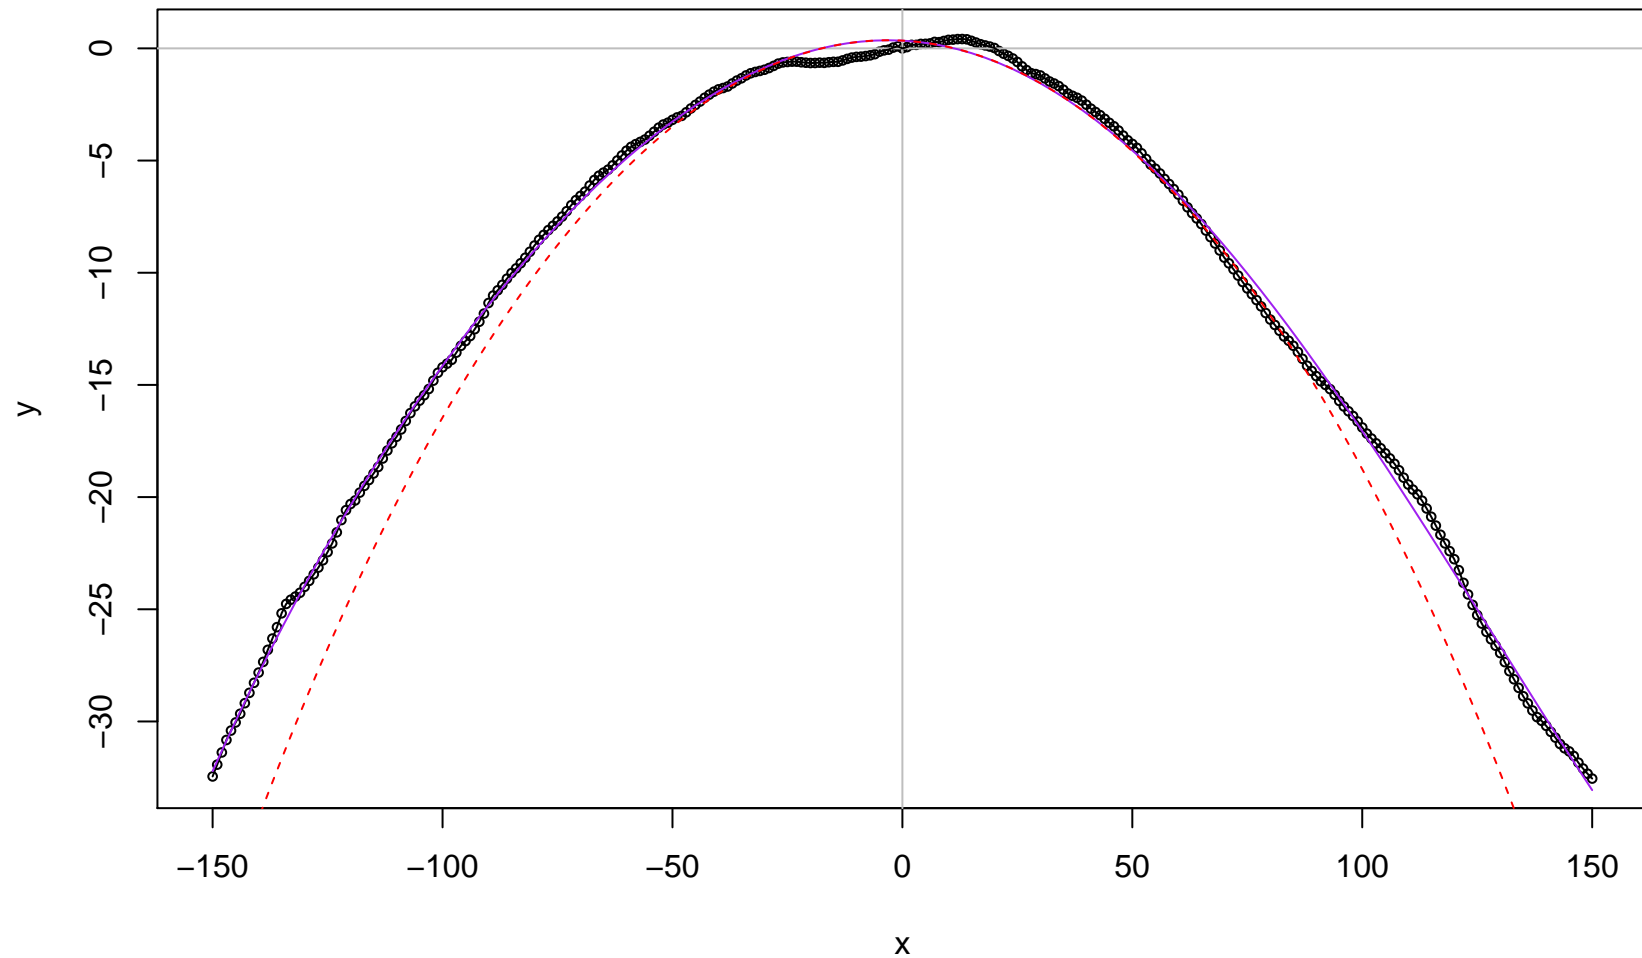

Site 154

$K*100 = -0.4069$

$R^2 = 0.9858$

radius =  $-245.7422$

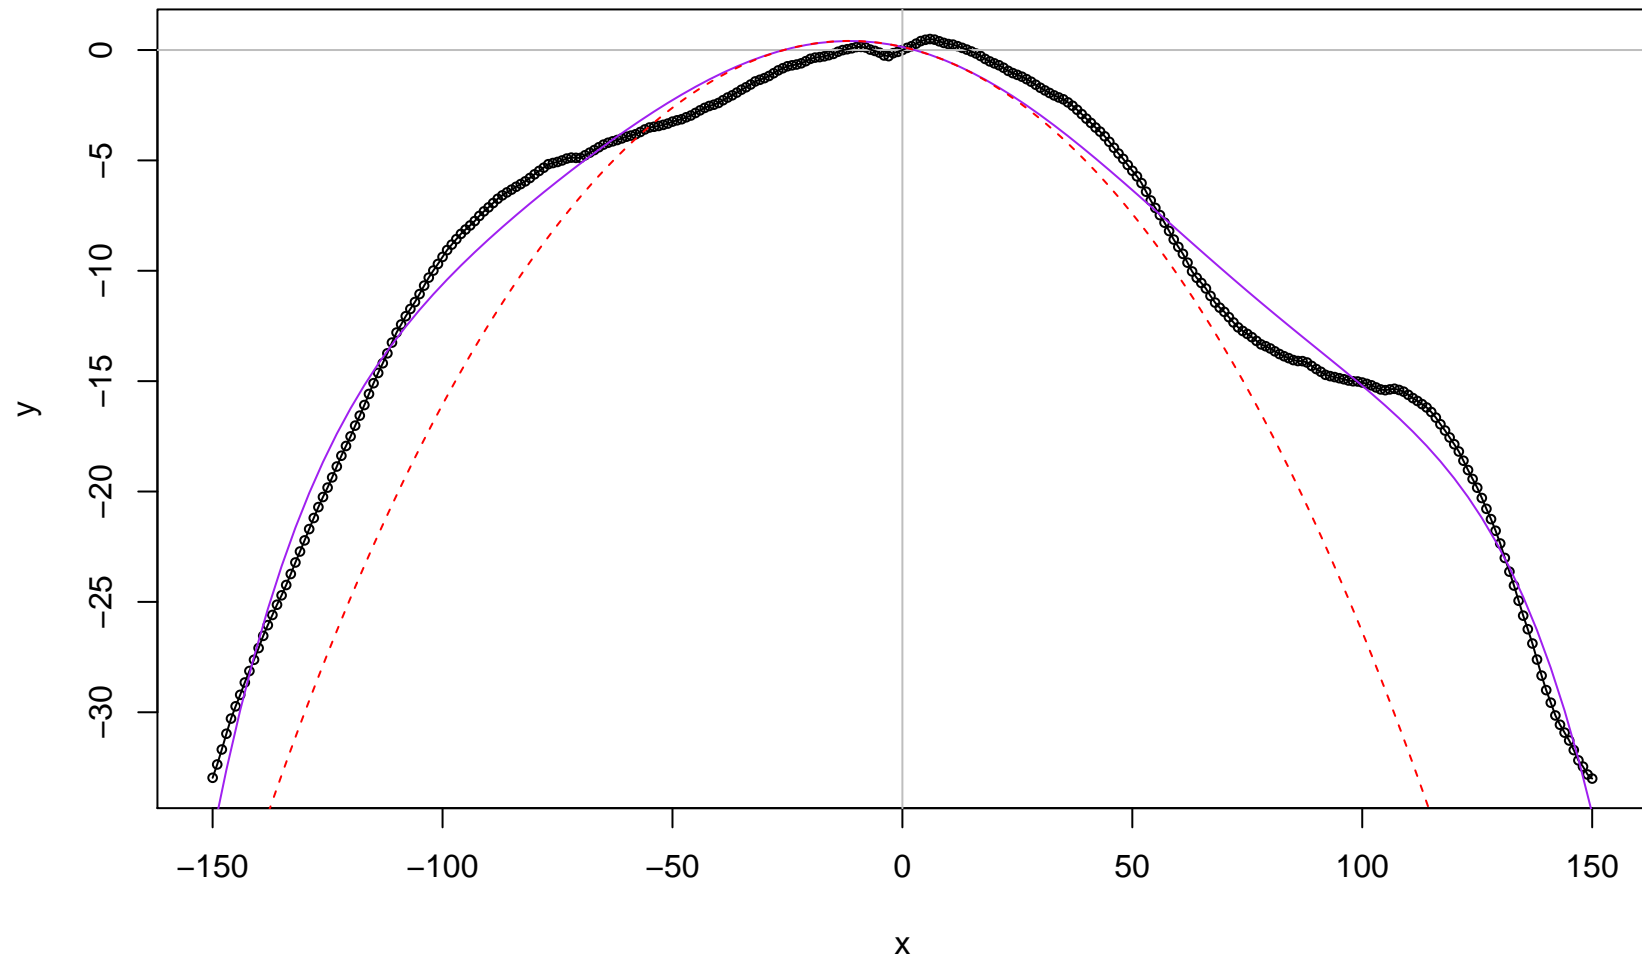

Site 155

$K \cdot 100 = 2.5742$

$R^2 = 0.9782$

radius = 38.847

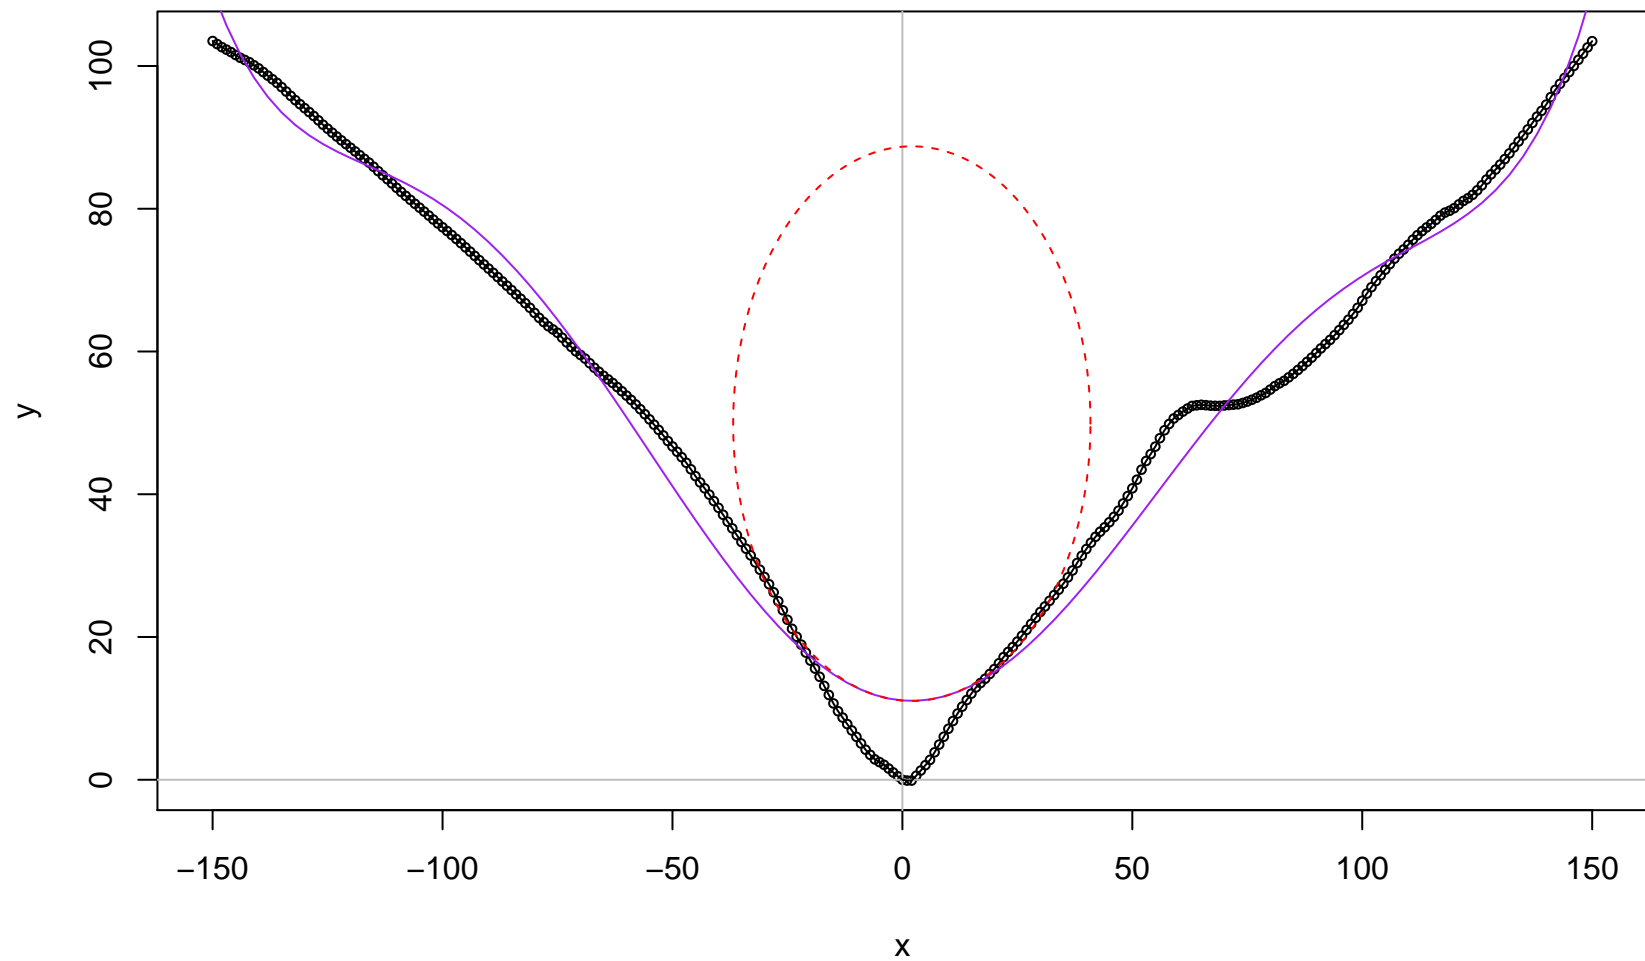

Site 156

$K \cdot 100 = 0.7125$

$R^2 = 0.9092$

radius= 140.3531

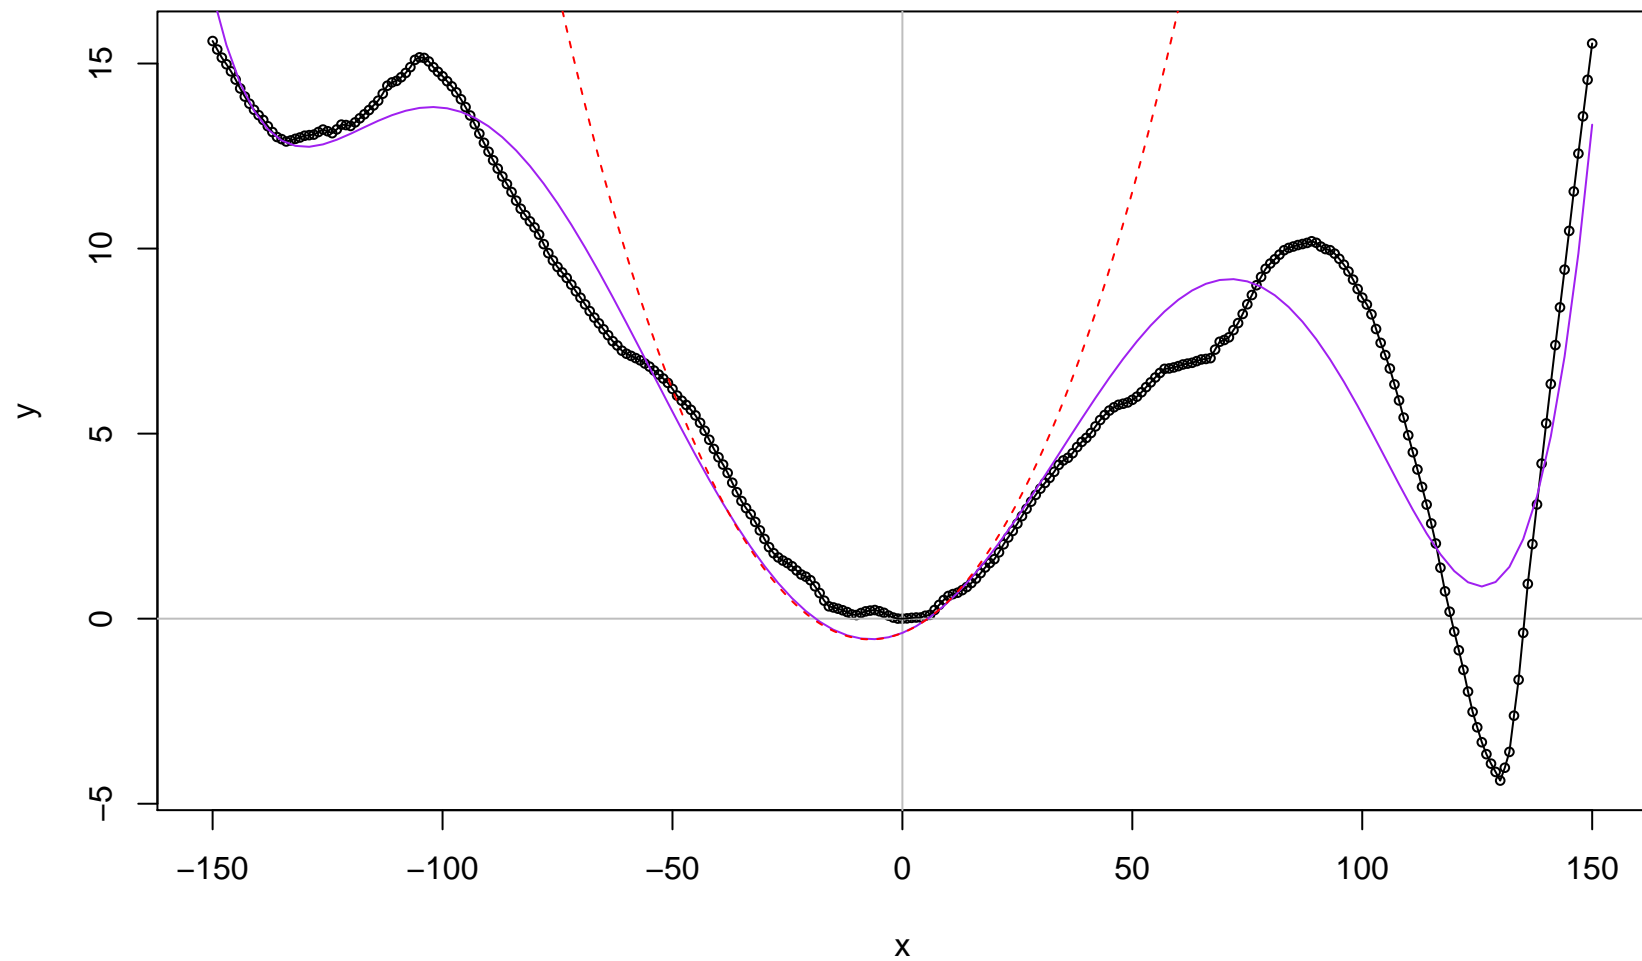

Site 157

$K*100= 1.8894$

$R^2= 0.9659$

radius= 52.9256

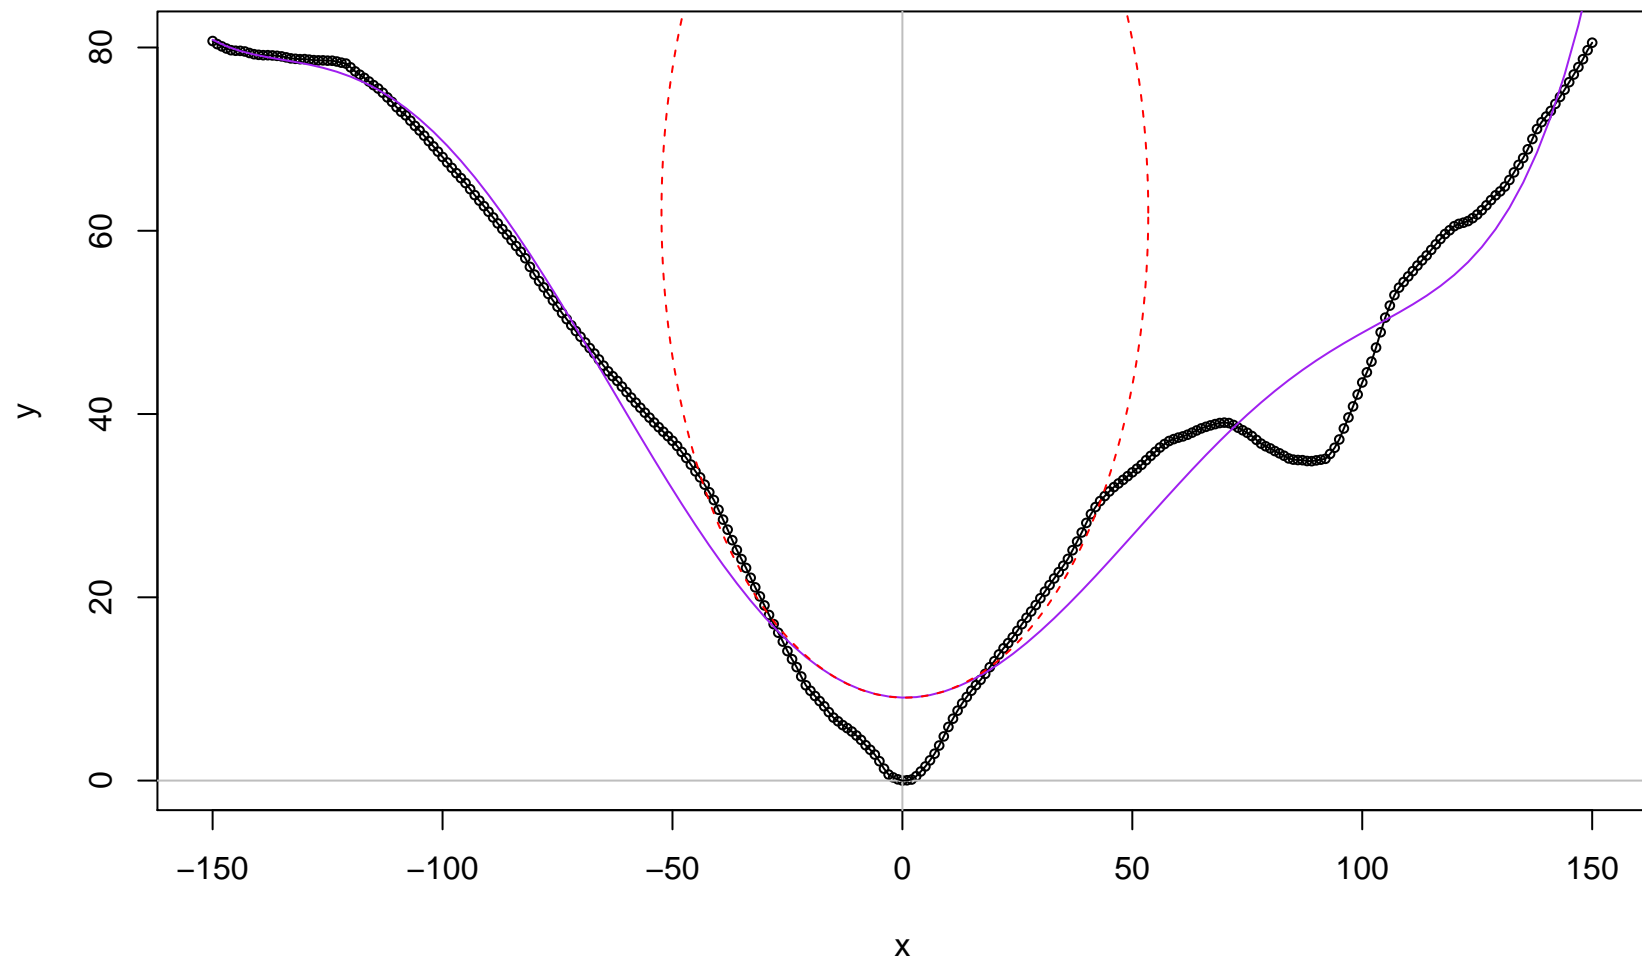

Site 158

$K*100 = -1.3746$

$R^2 = 0.9943$

radius =  $-72.7471$

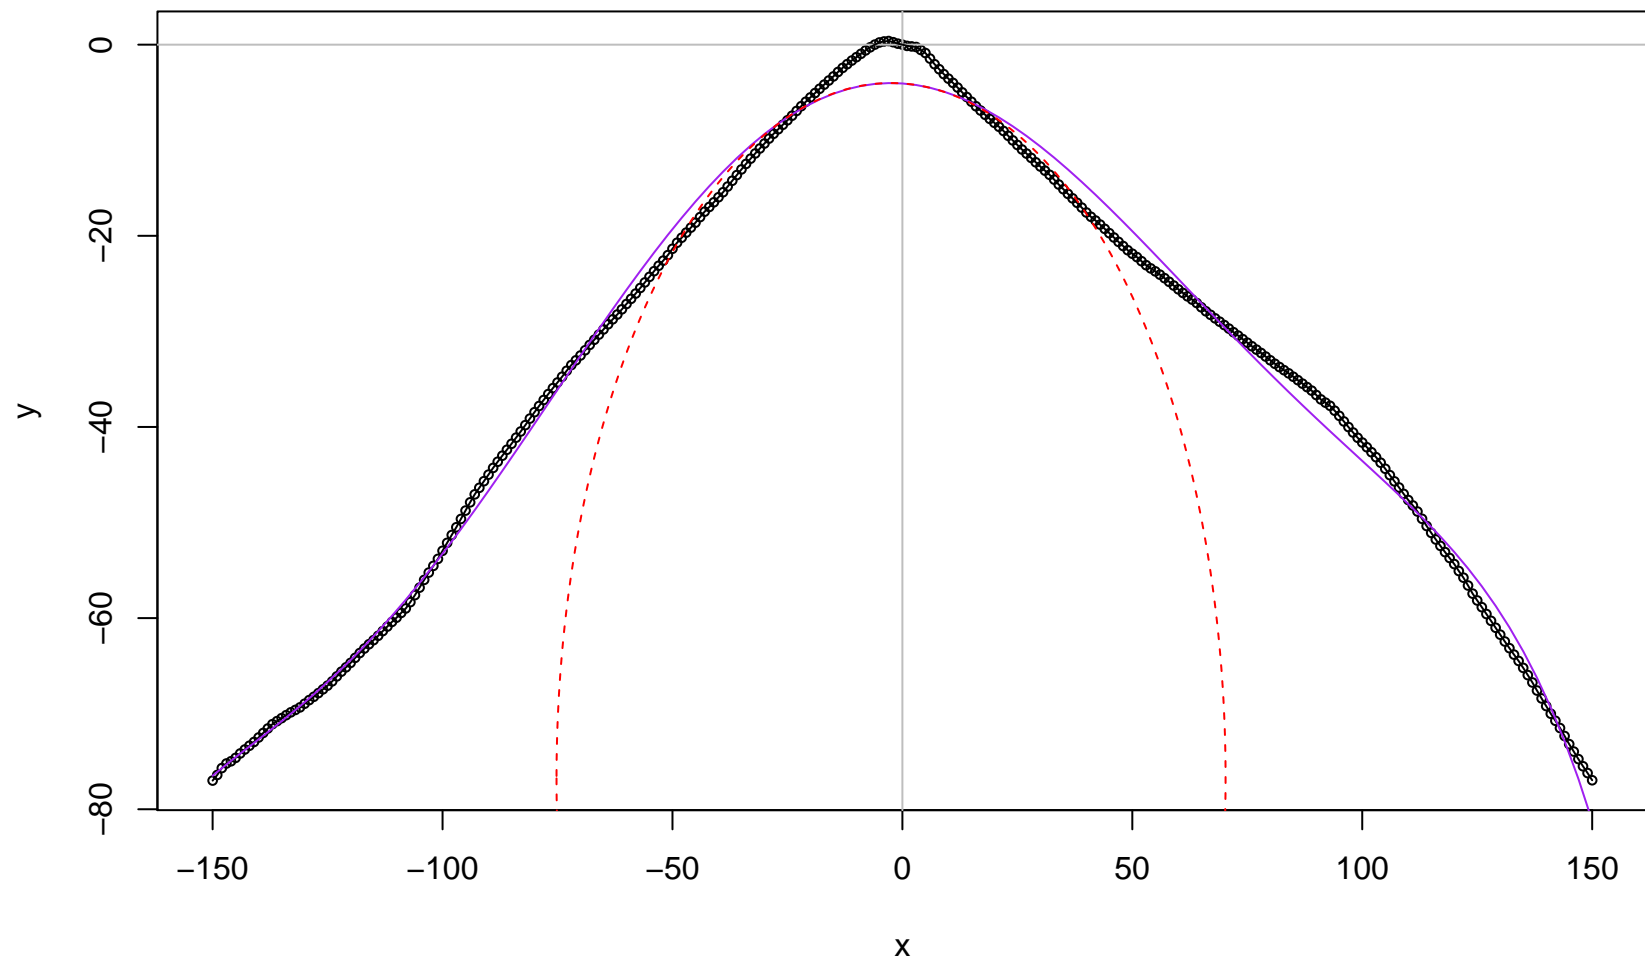

Site 159

$K \cdot 100 = 0.5534$

$R^2 = 0.9739$

radius= 180.7038

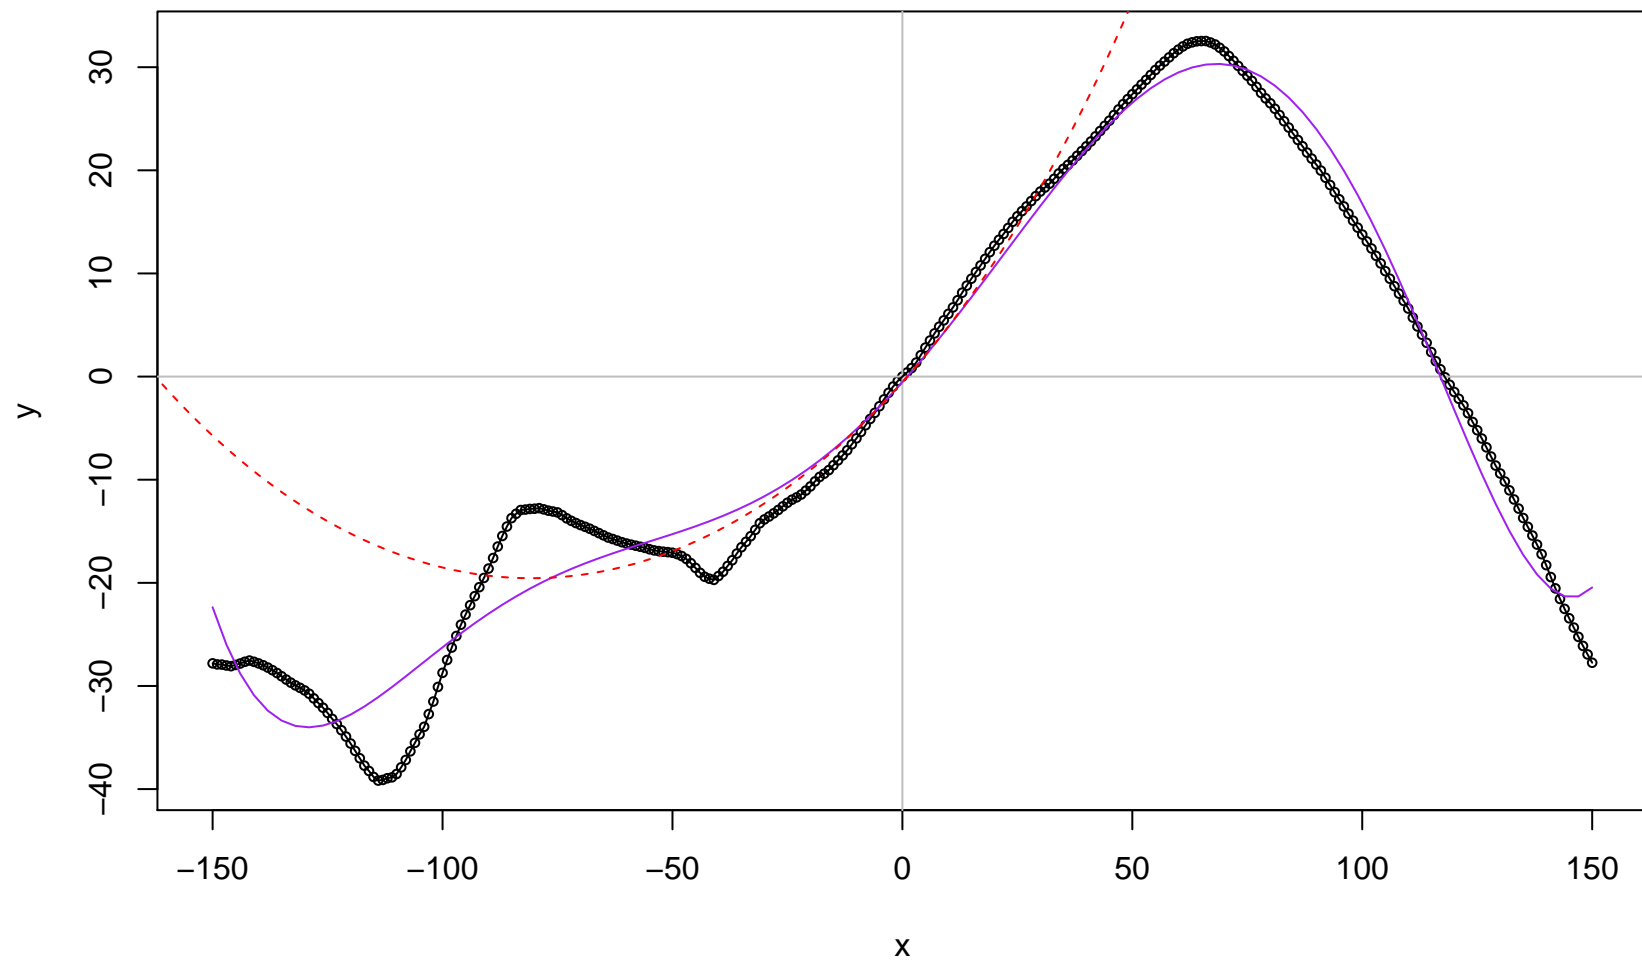

Site 160

$K*100= 0.4042$

$R^2= 0.8964$

radius= 247.3871

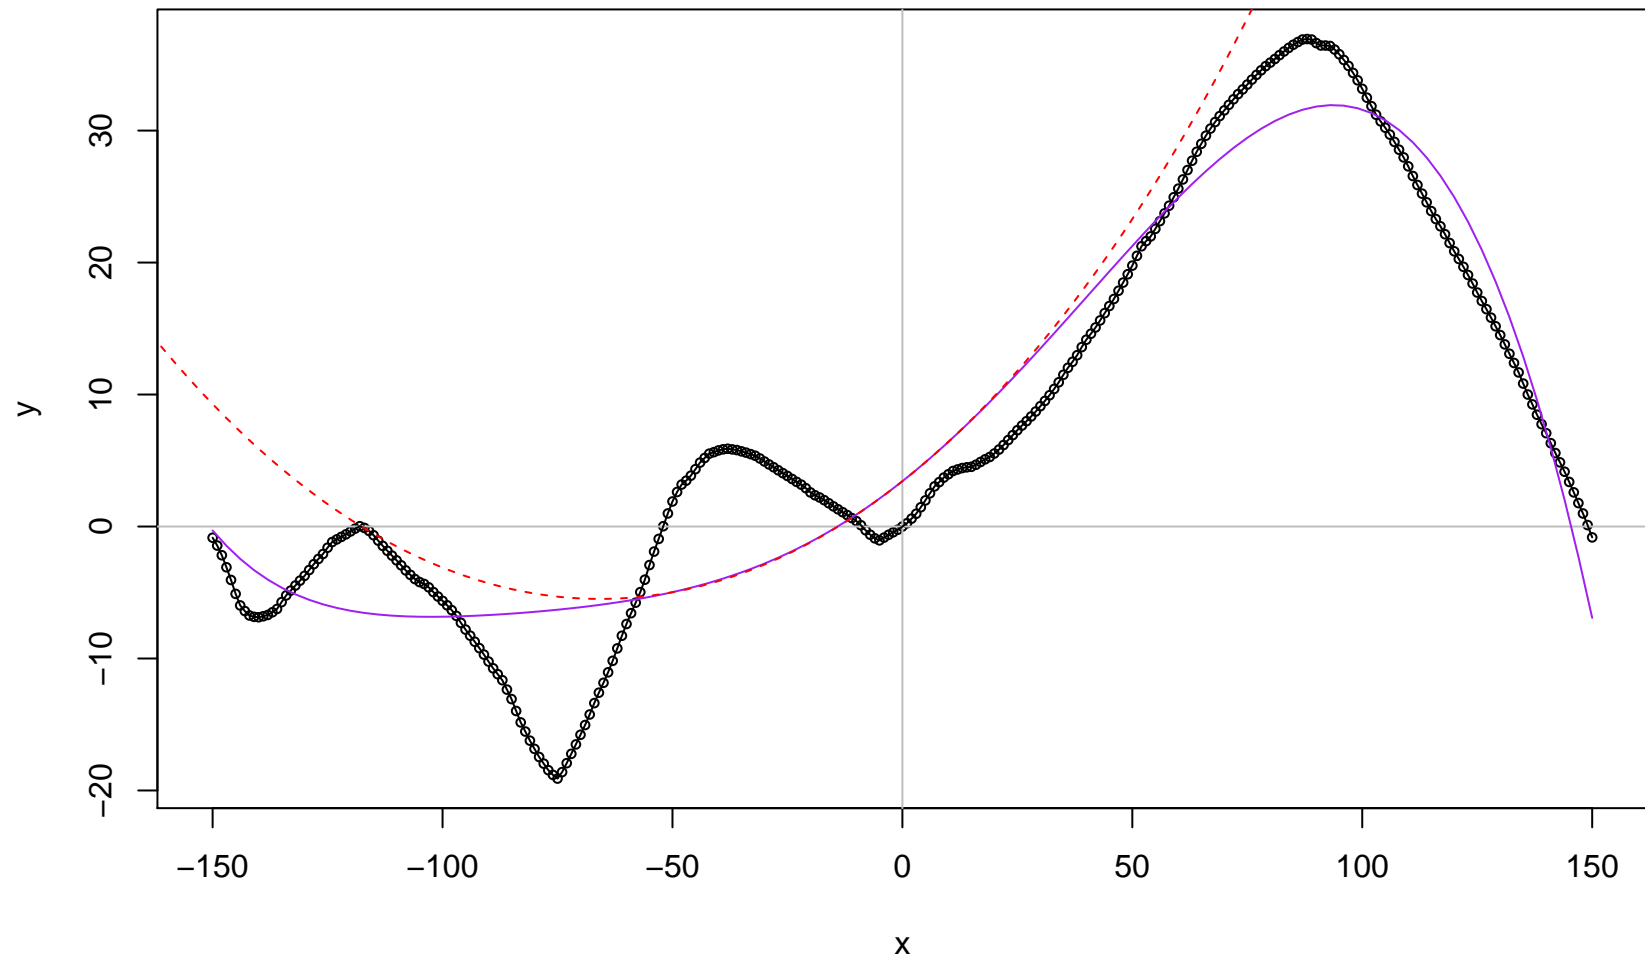



Site 161

$K \cdot 100 = 0.7212$

$R^2 = 0.9885$

radius= 138.6634

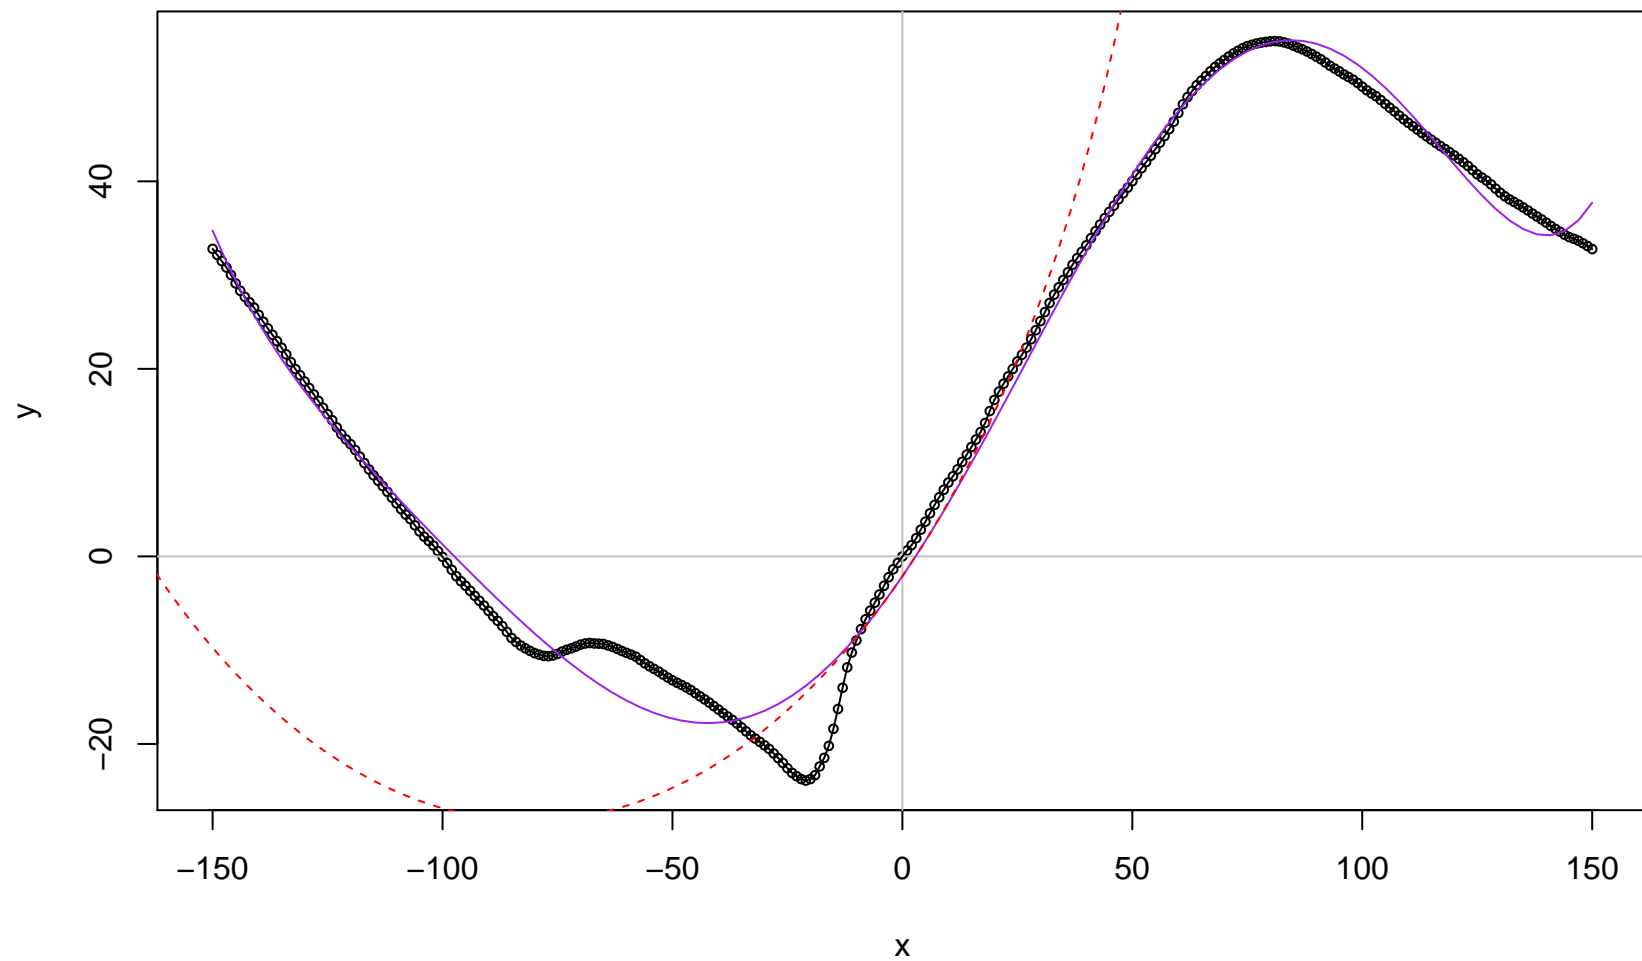

Site 162

$K \cdot 100 = 1.1331$

$R^2 = 0.9961$

radius = 88.257

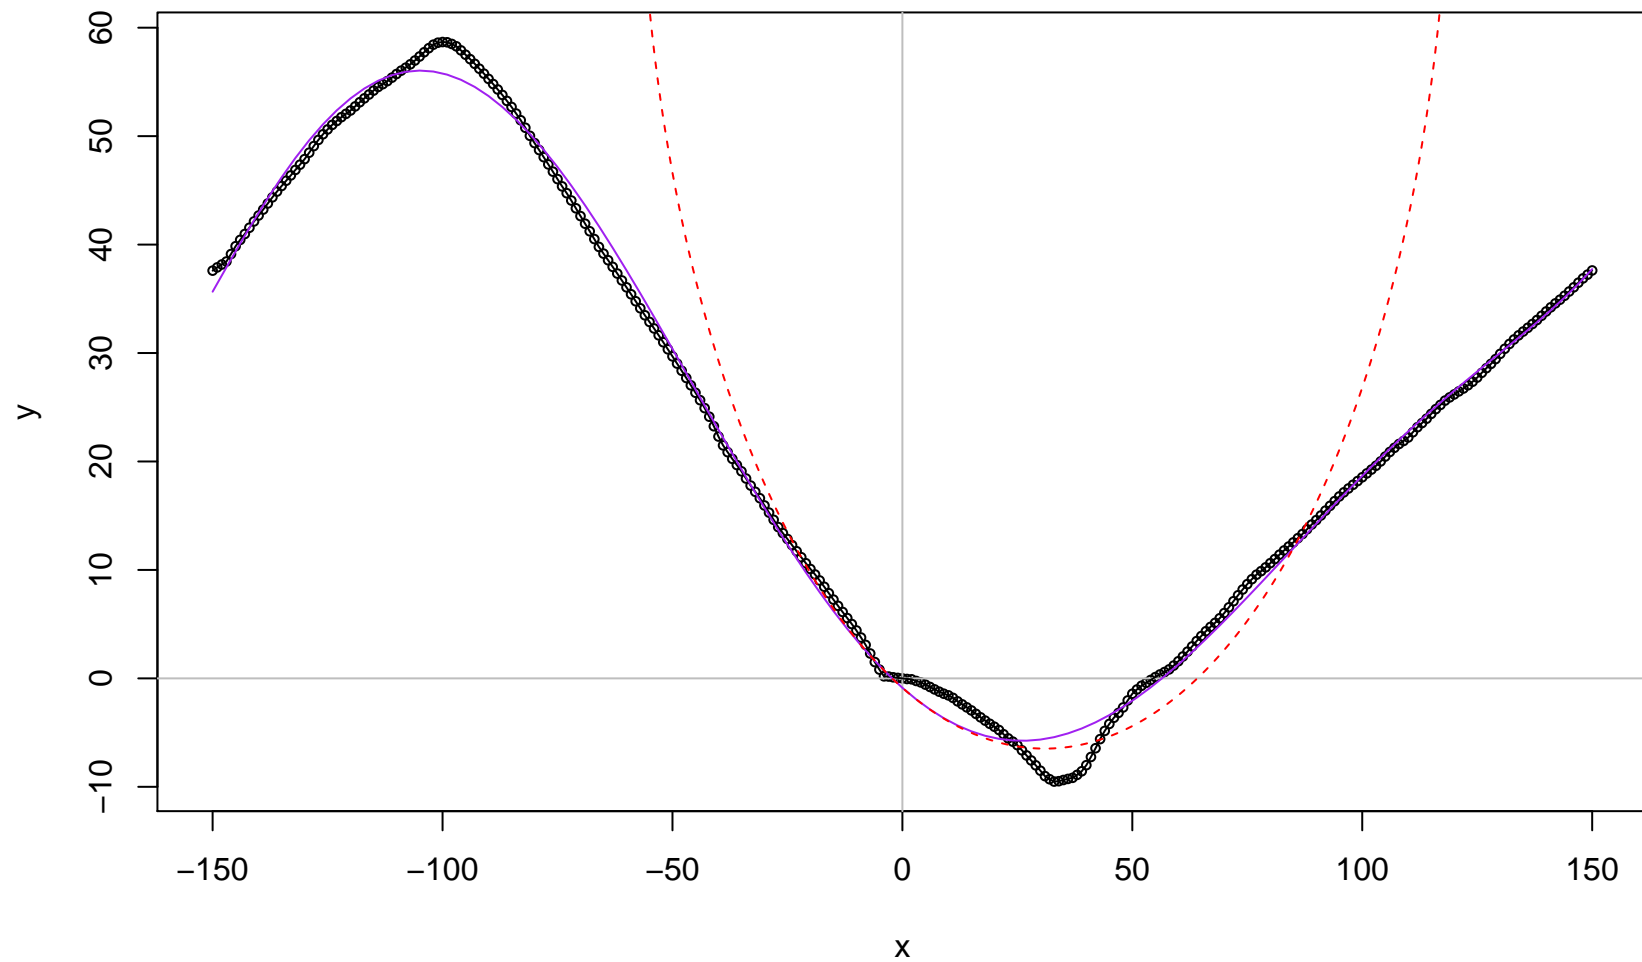

Site 163

$K \cdot 100 = 0.9958$

$R^2 = 0.9954$

radius= 100.422

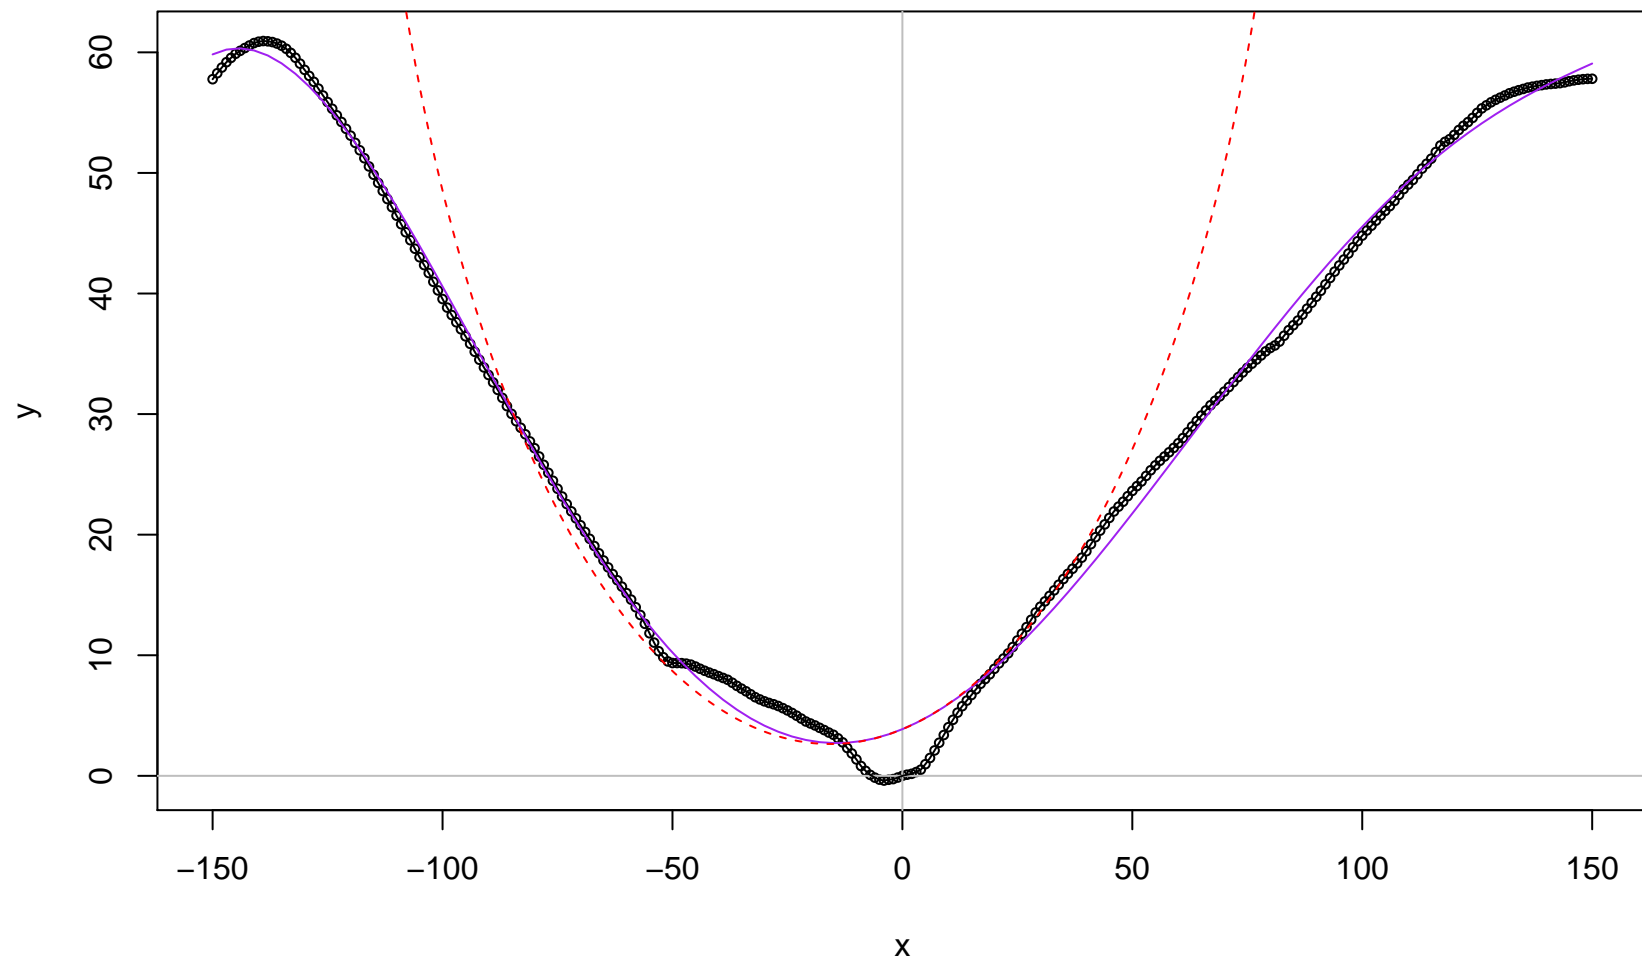

Site 164

$K \cdot 100 = 1.0862$

$R^2 = 0.8888$

radius = 92.0648

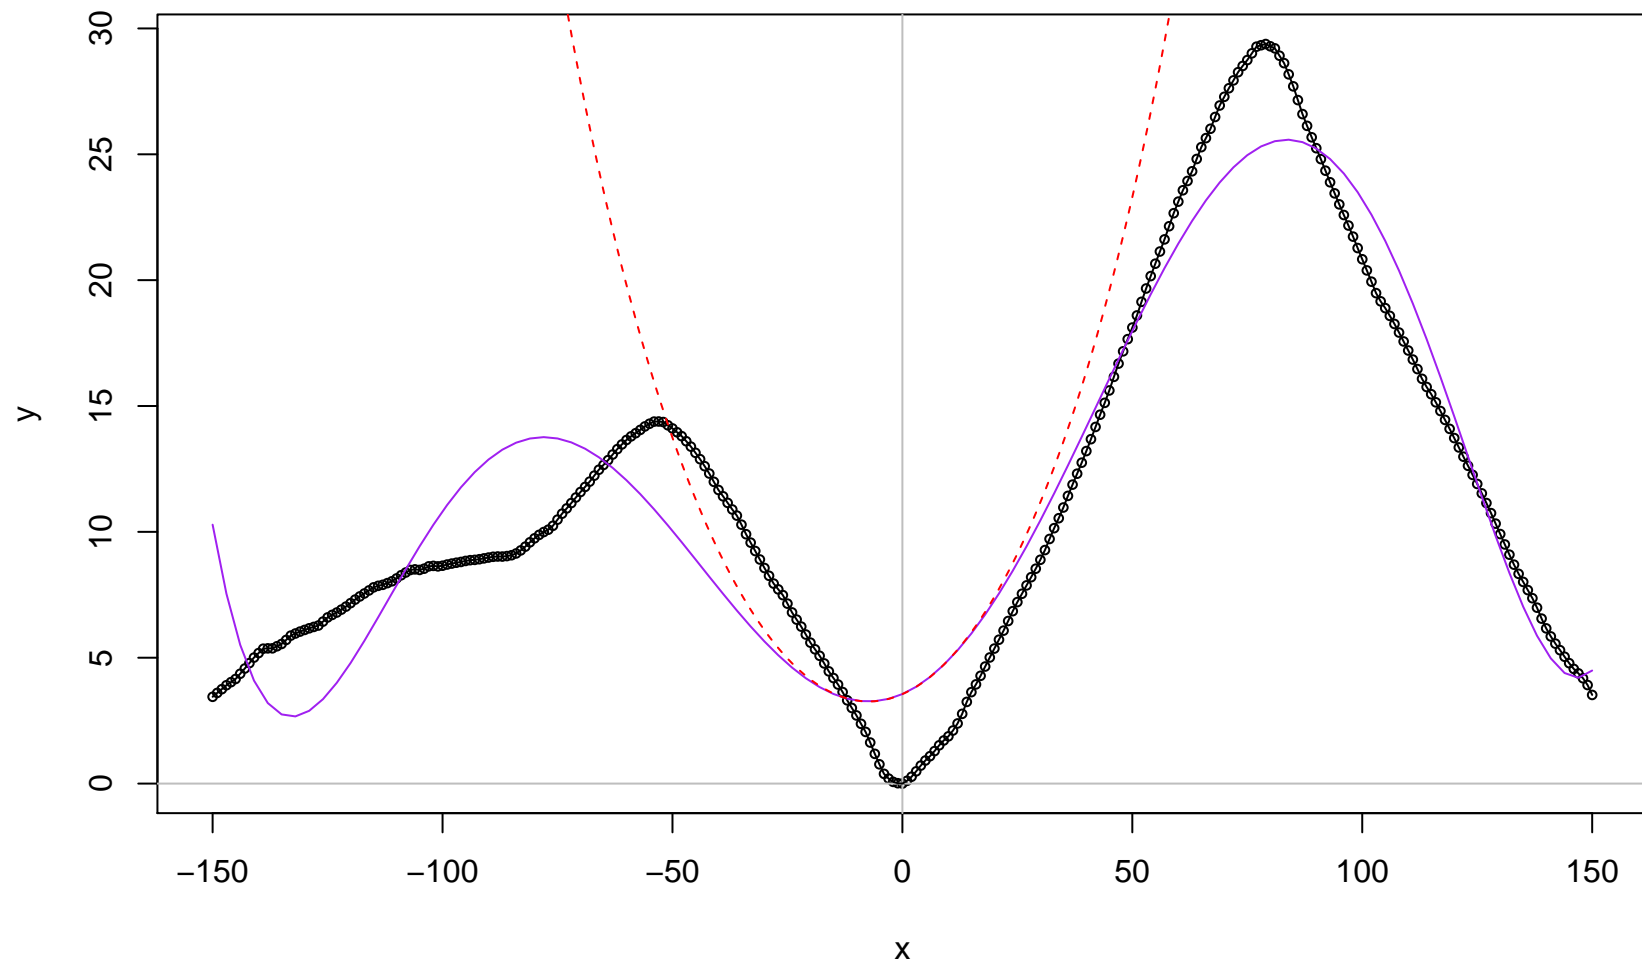

Site 165

$K \cdot 100 = -0.323$

$R^2 = 0.9862$

radius = -309.5669

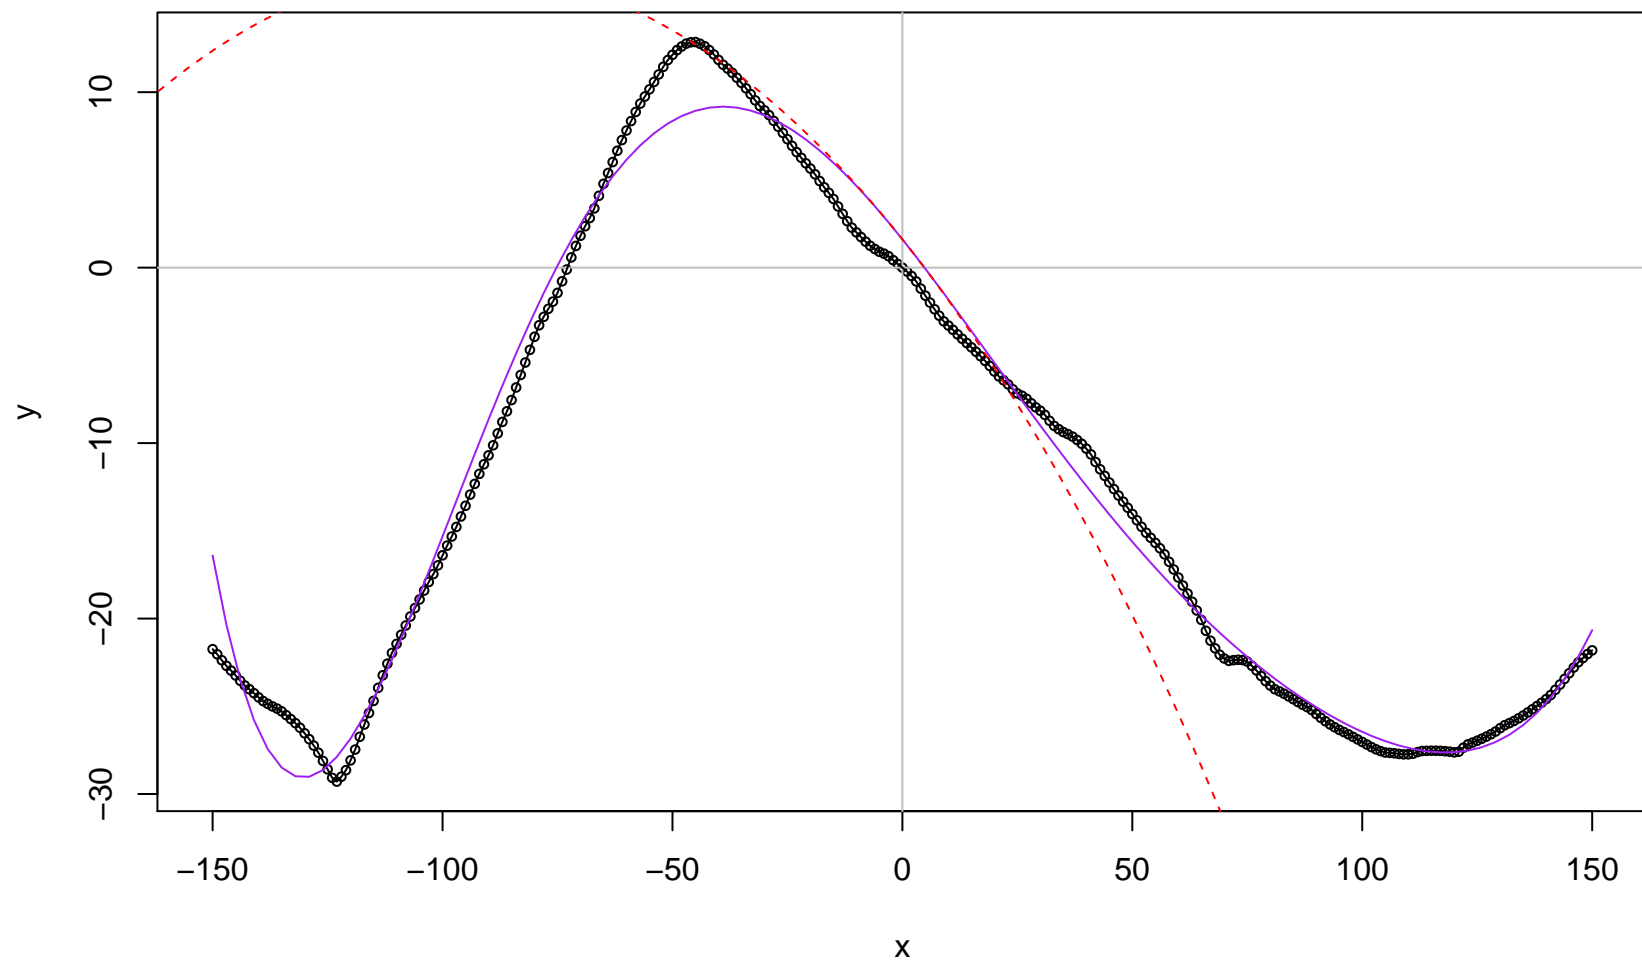

Site 166

$K*100= 0.2367$

$R^2= 0.9945$

radius= 422.5334

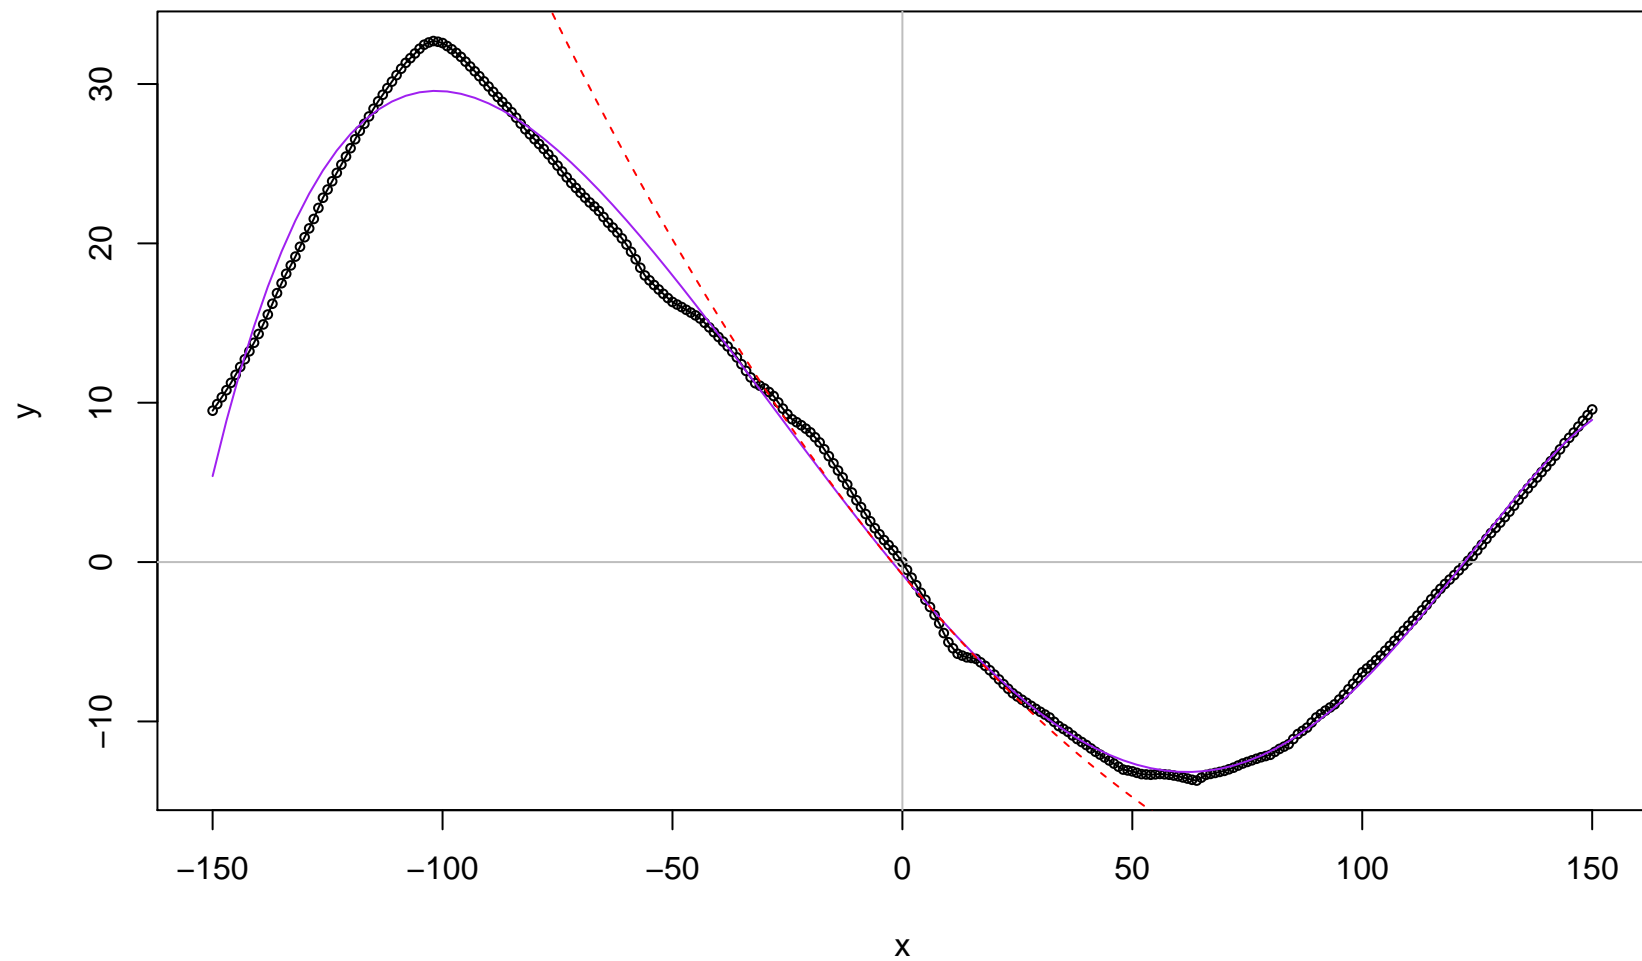

Site 167

$K*100 = -0.7388$

$R^2 = 0.9854$

radius =  $-135.3588$

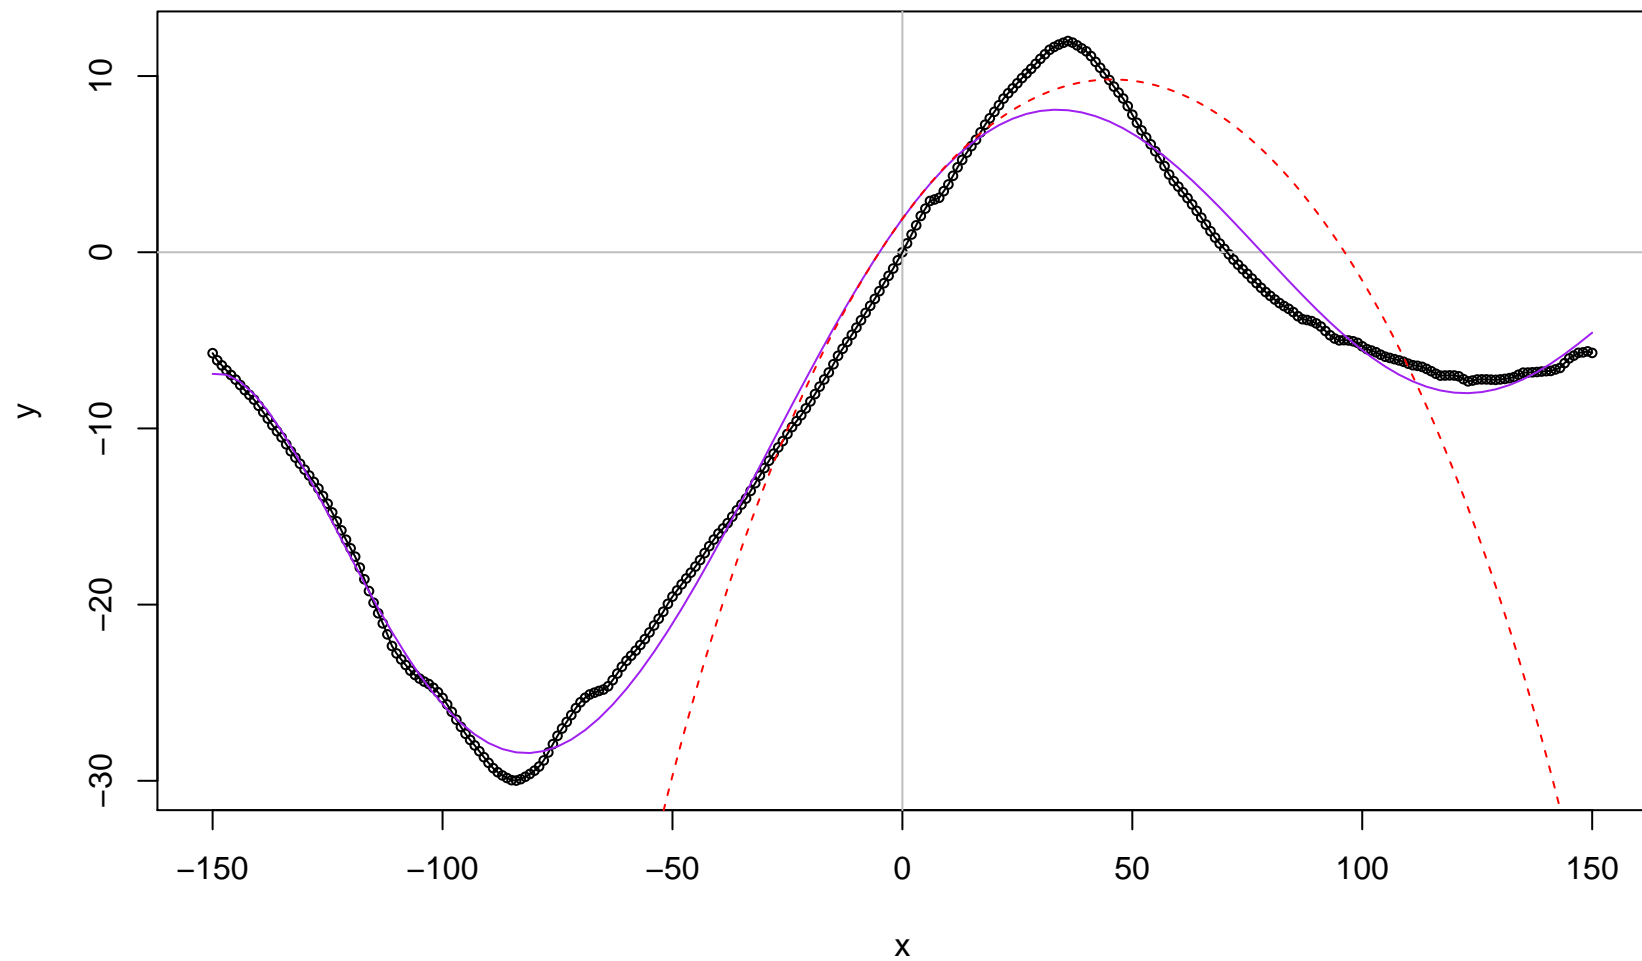

Site 168

$K*100 = -0.6279$

$R^2 = 0.9038$

radius =  $-159.2512$

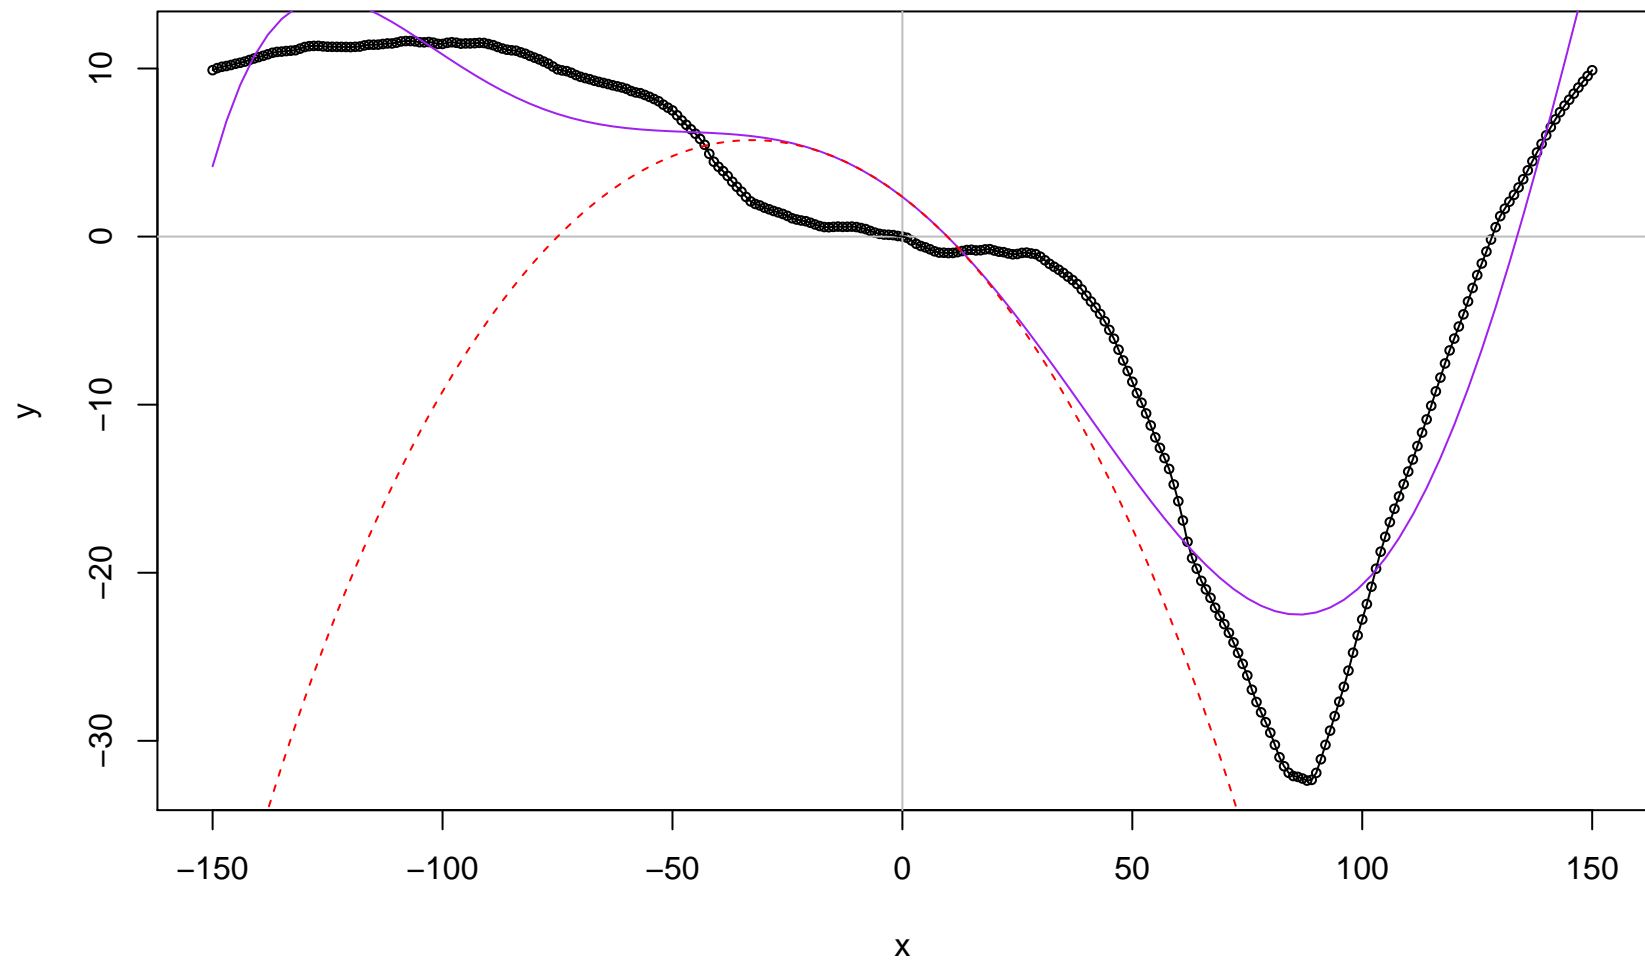



Site 169

$K*100 = -0.7881$

$R^2 = 0.9905$

radius =  $-126.8868$

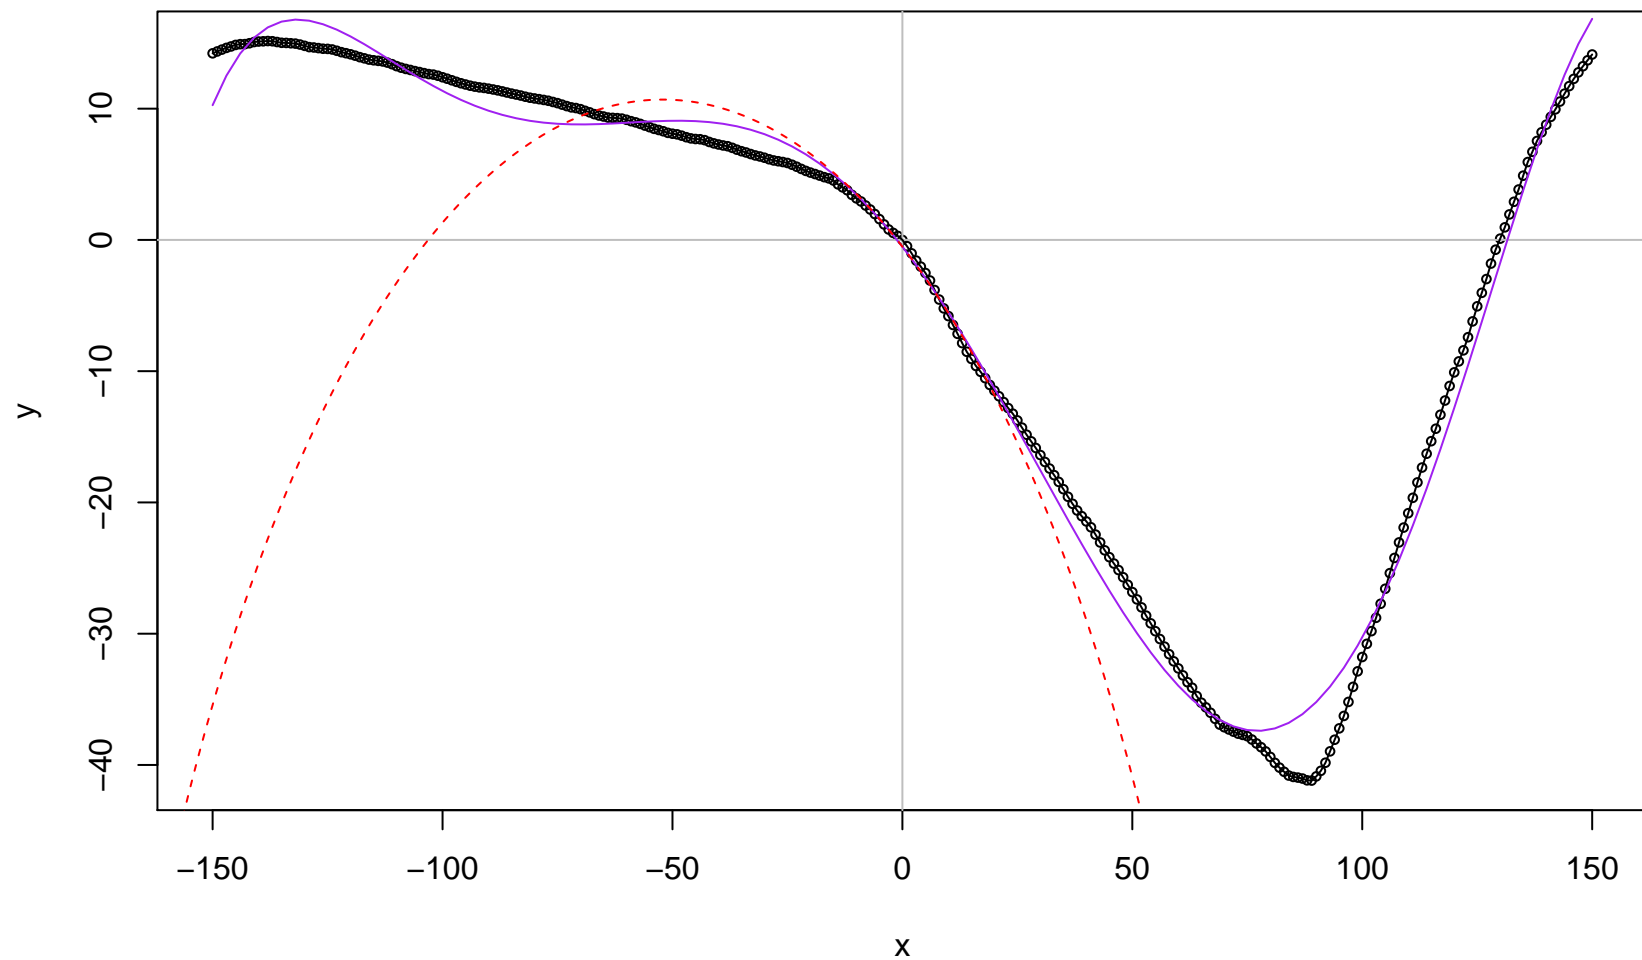

Site 170

$K \cdot 100 = 1.6369$

$R^2 = 0.9726$

radius = 61.092

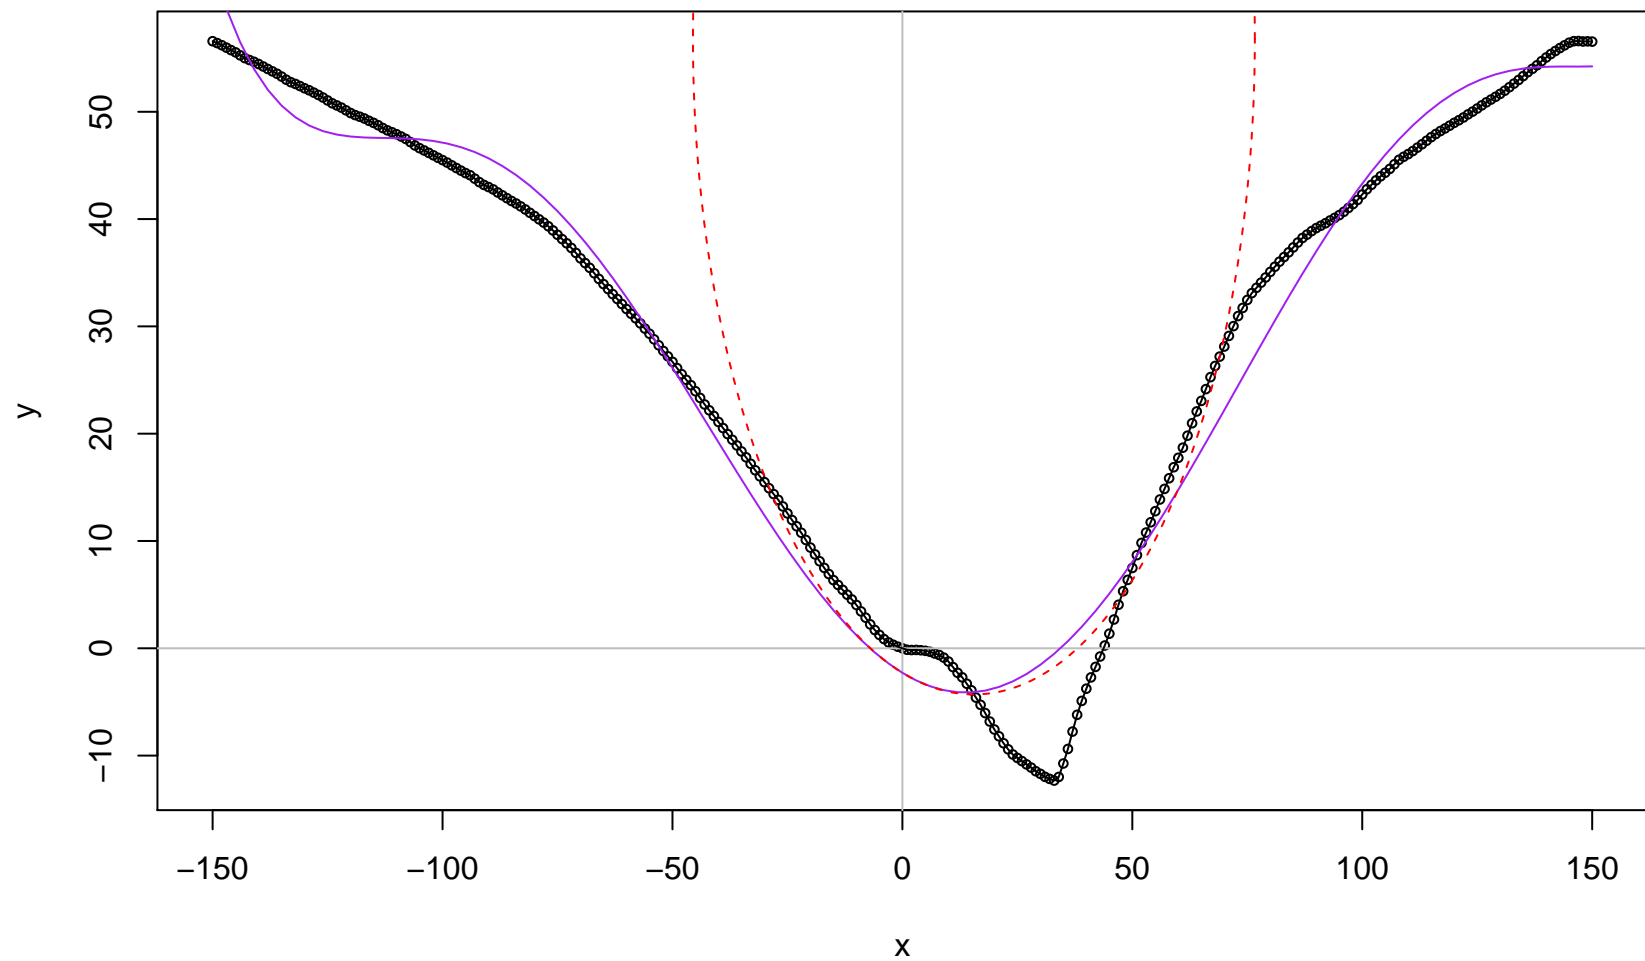

Site 171

$K*100 = -0.2263$

$R^2 = 0.9845$

radius =  $-441.954$

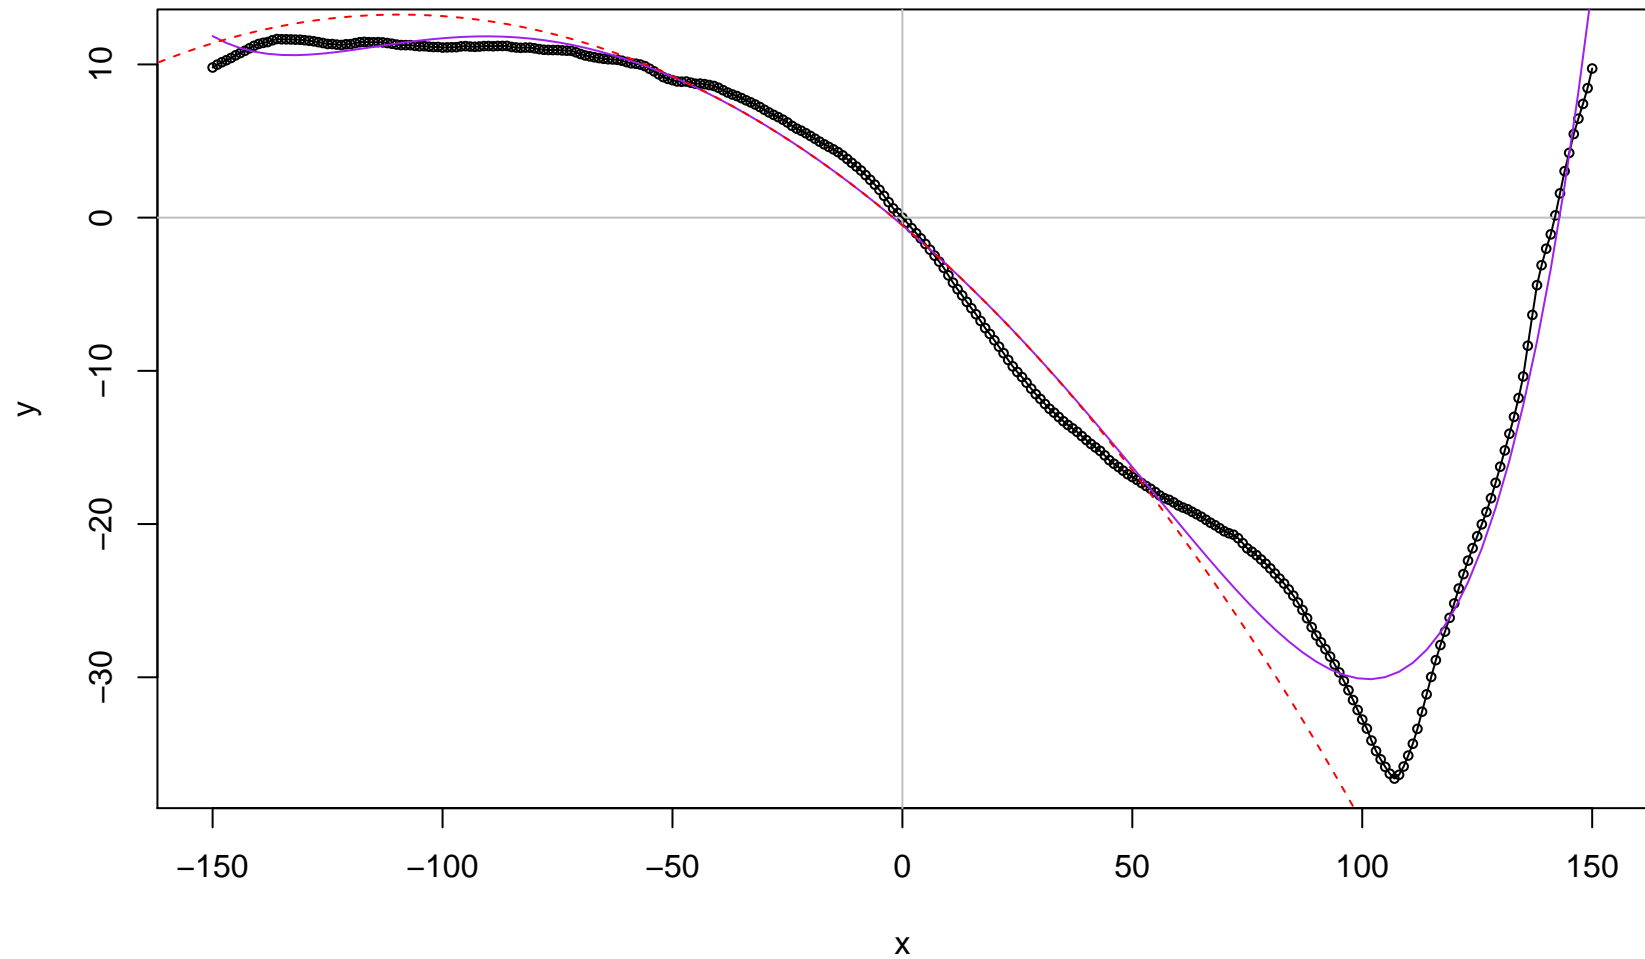

Site 172

$K*100= 0.2881$

$R^2= 0.98$

radius= 347.1305

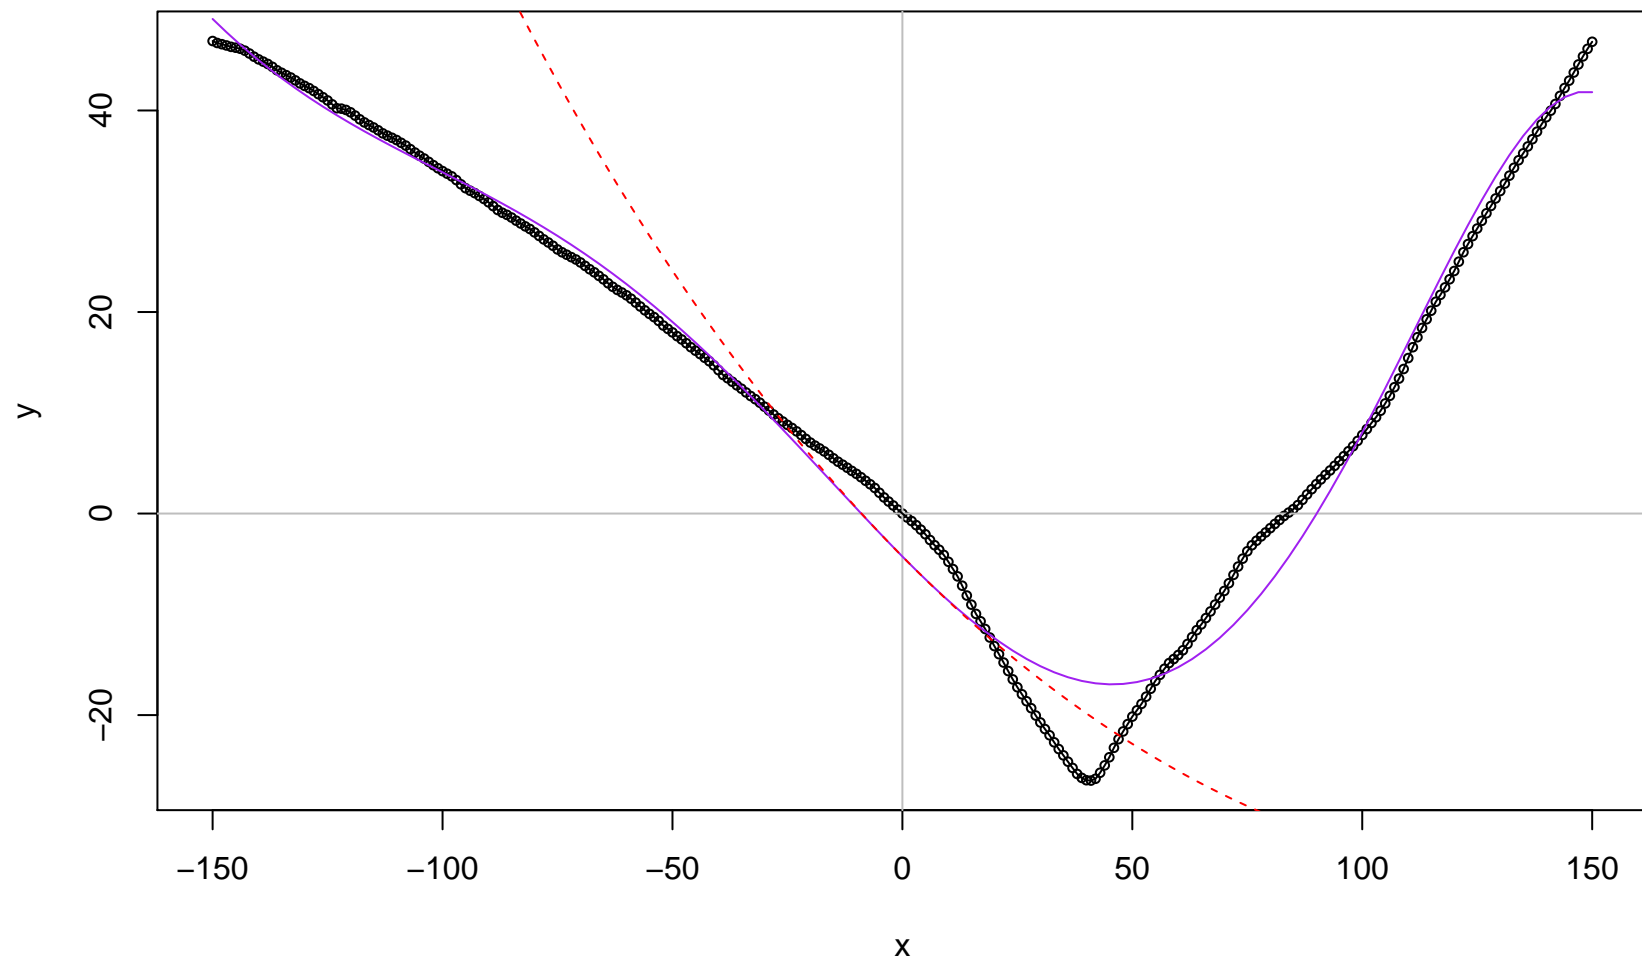

Site 173

$K \cdot 100 = 0.7674$

$R^2 = 0.9707$

radius= 130.3128

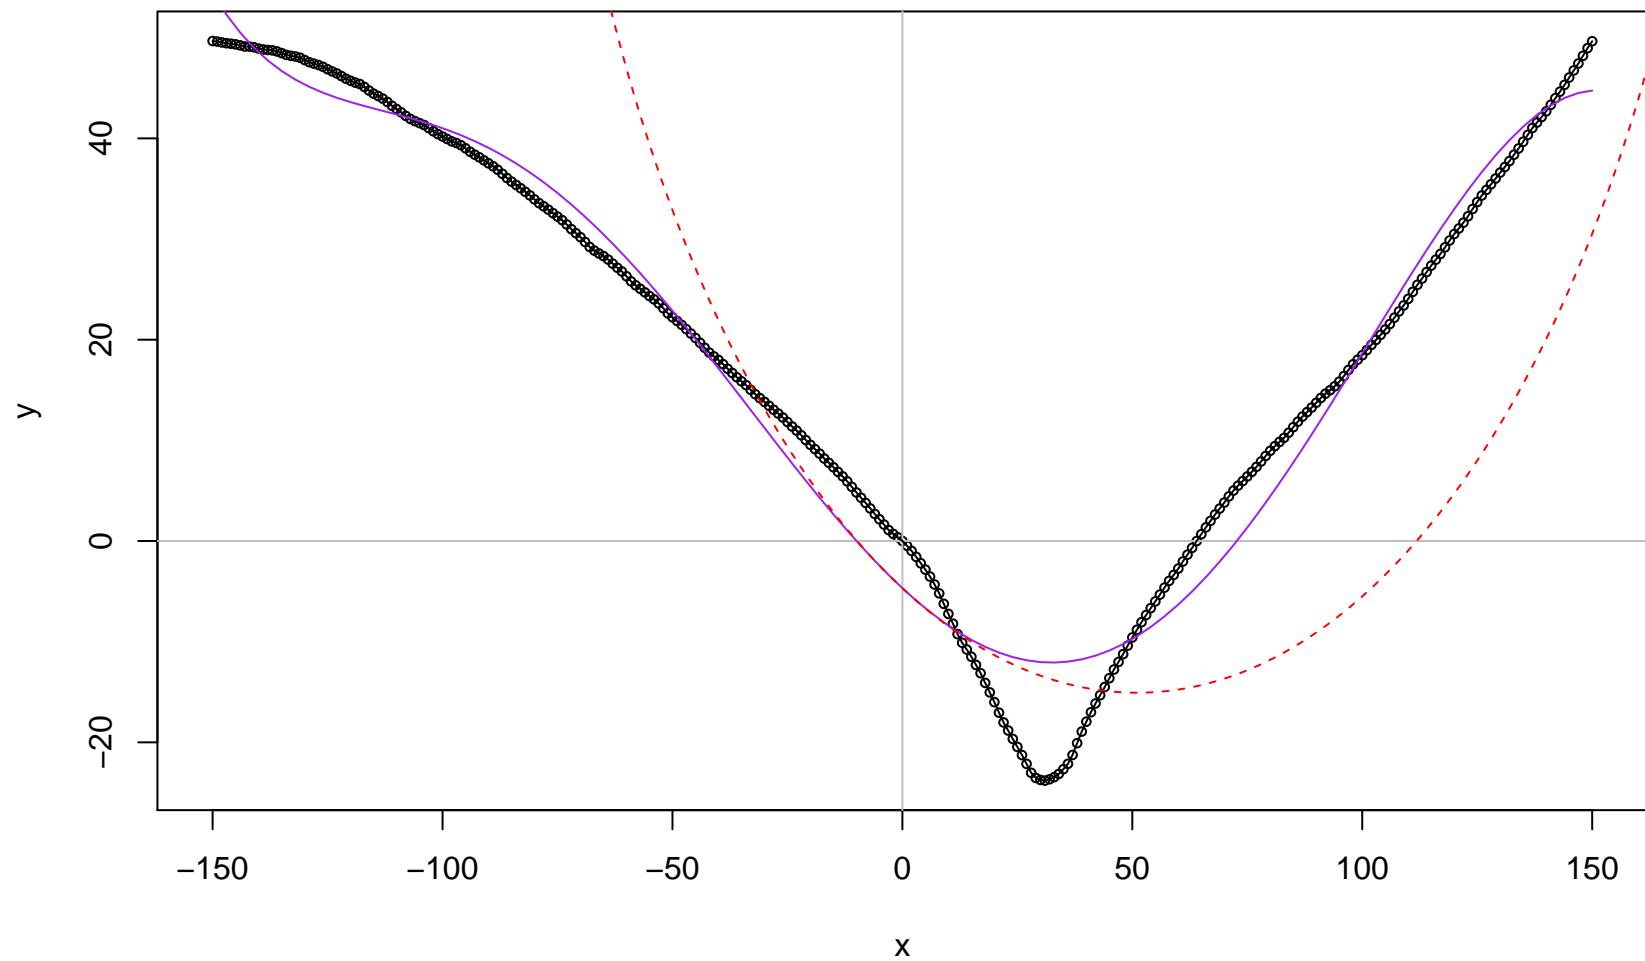

Site 174

$K*100= 0.348$

$R^2= 0.9747$

radius= 287.3851

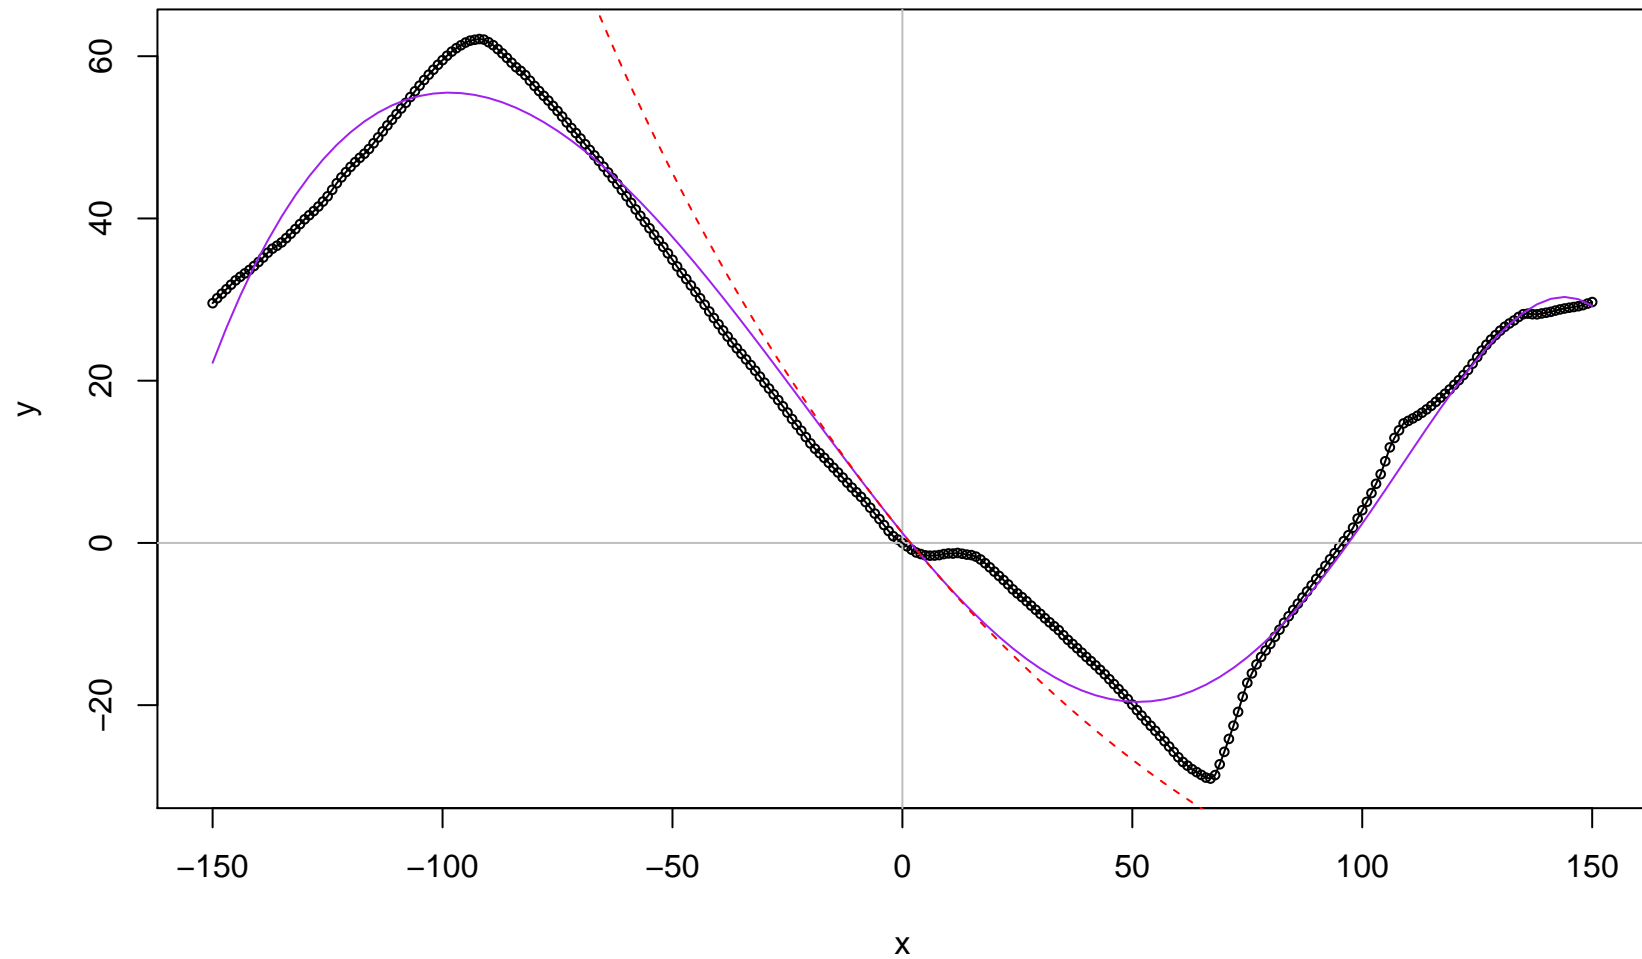

Site 175

$K^*100 = 1.3733$

$R^2 = 0.98$

radius= 72.8153

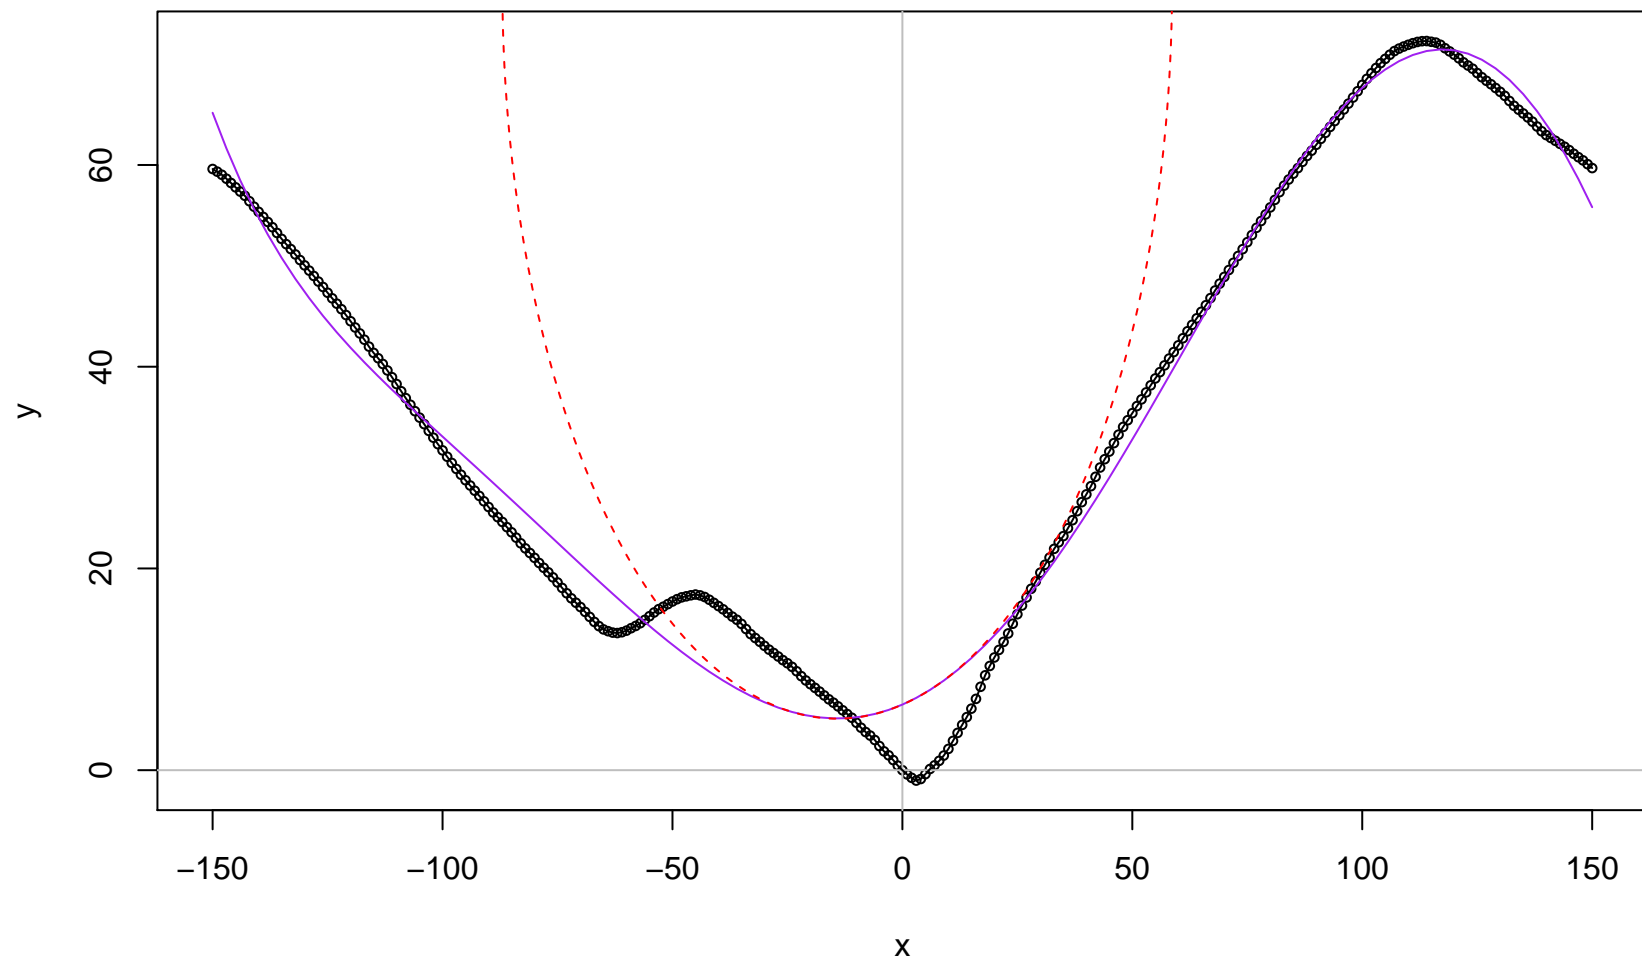

Site 176

$K \cdot 100 = 0.0067$

$R^2 = 0.8669$

radius= 14939.0045

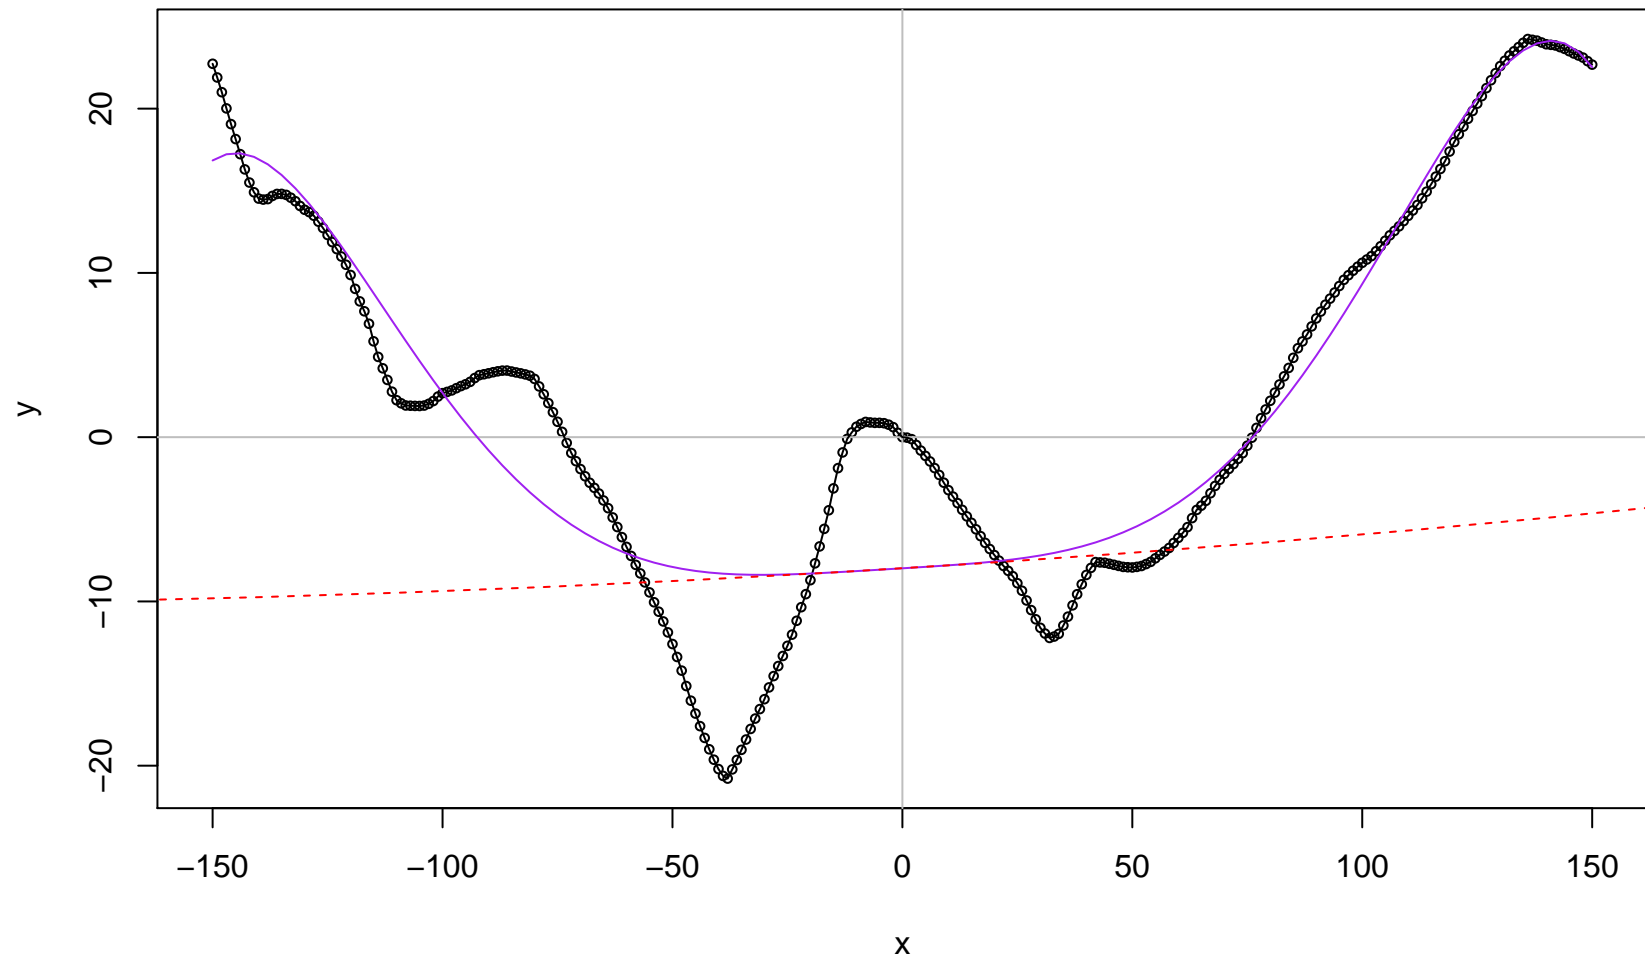



Site 177

$K*100= 0.6501$

$R^2= 0.937$

radius= 153.8336

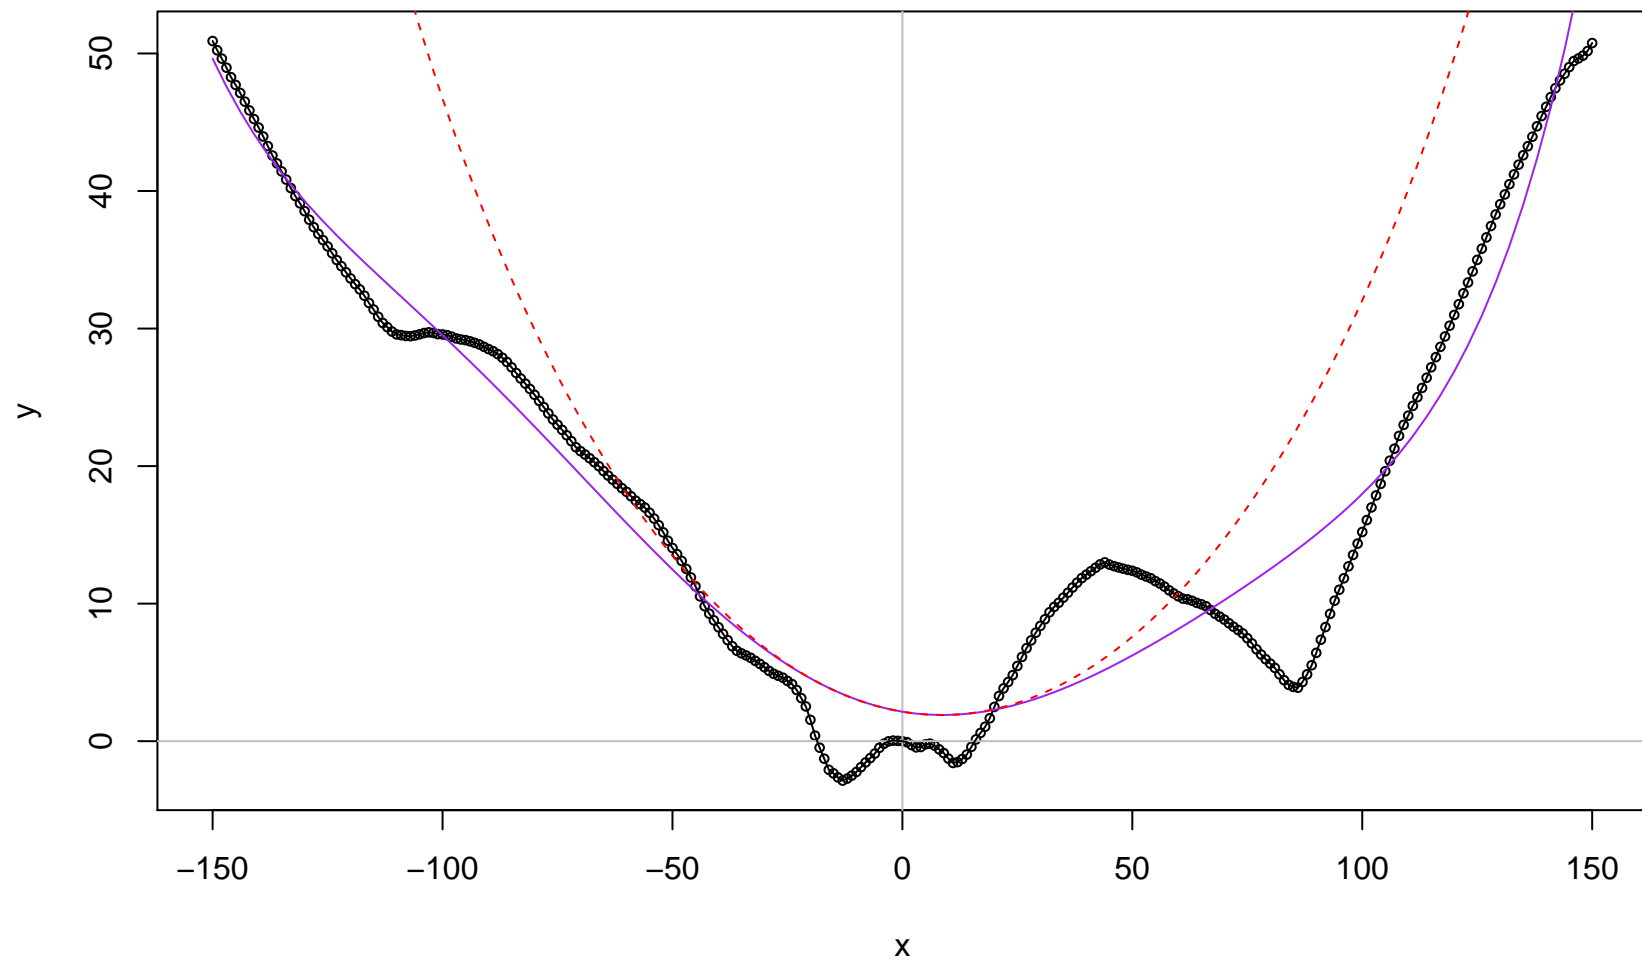

Site 178

$K*100 = -0.15$

$R^2 = 0.9657$

radius =  $-666.7318$

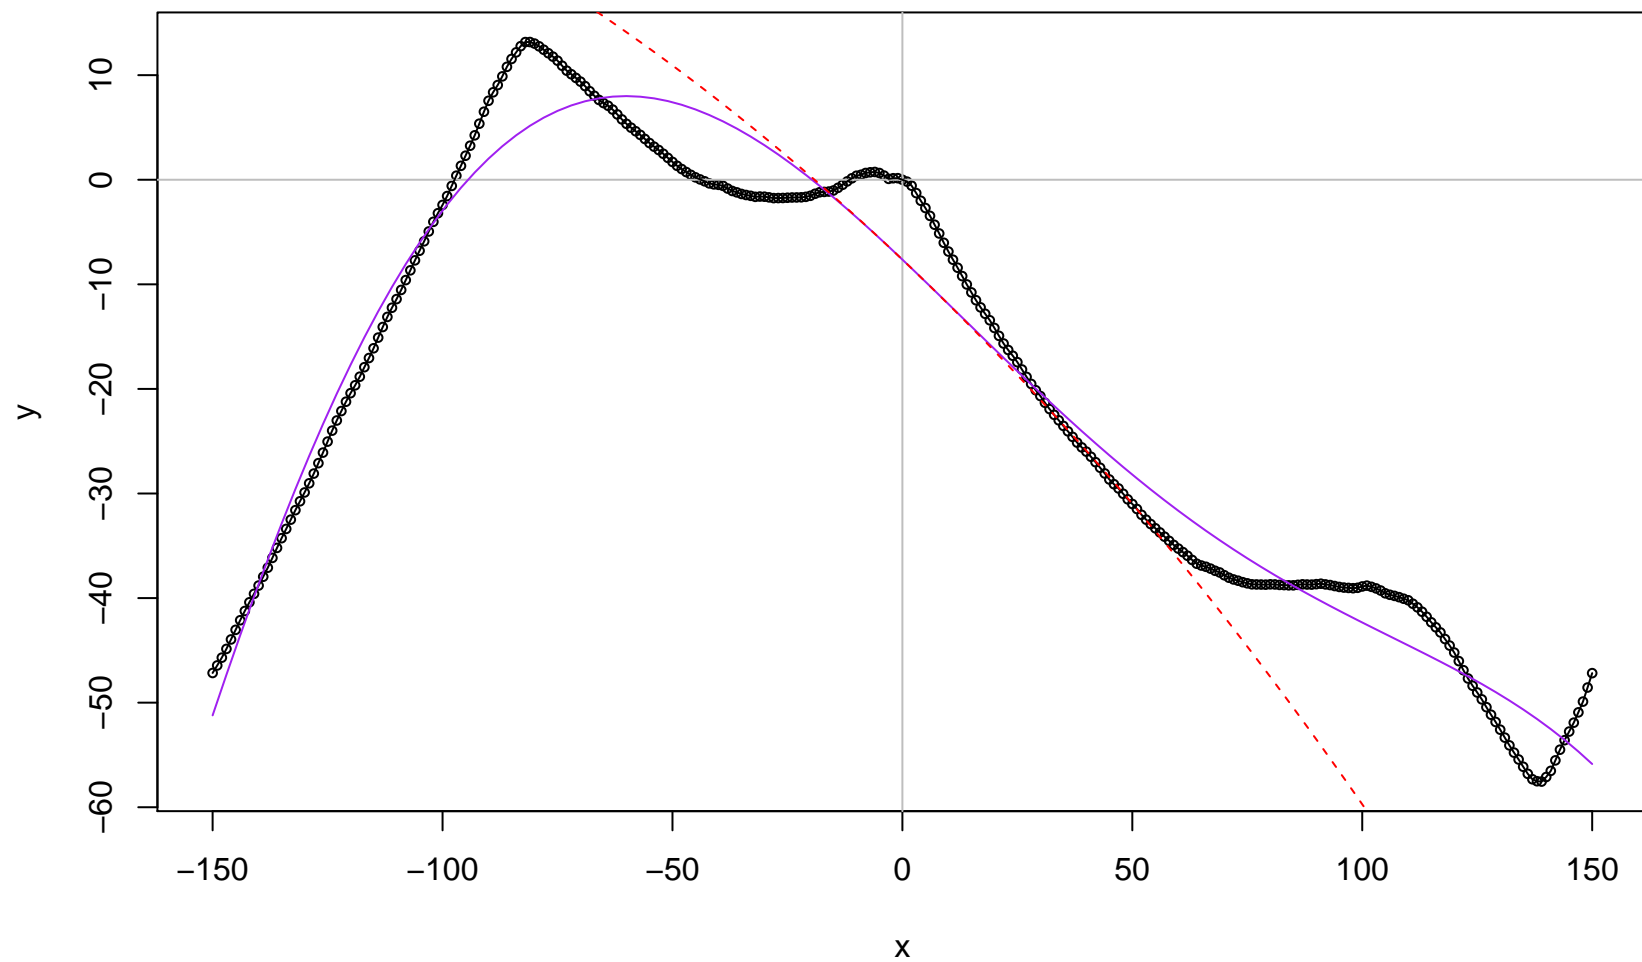

Site 179

$K*100 = -0.2382$

$R^2 = 0.967$

radius =  $-419.8373$

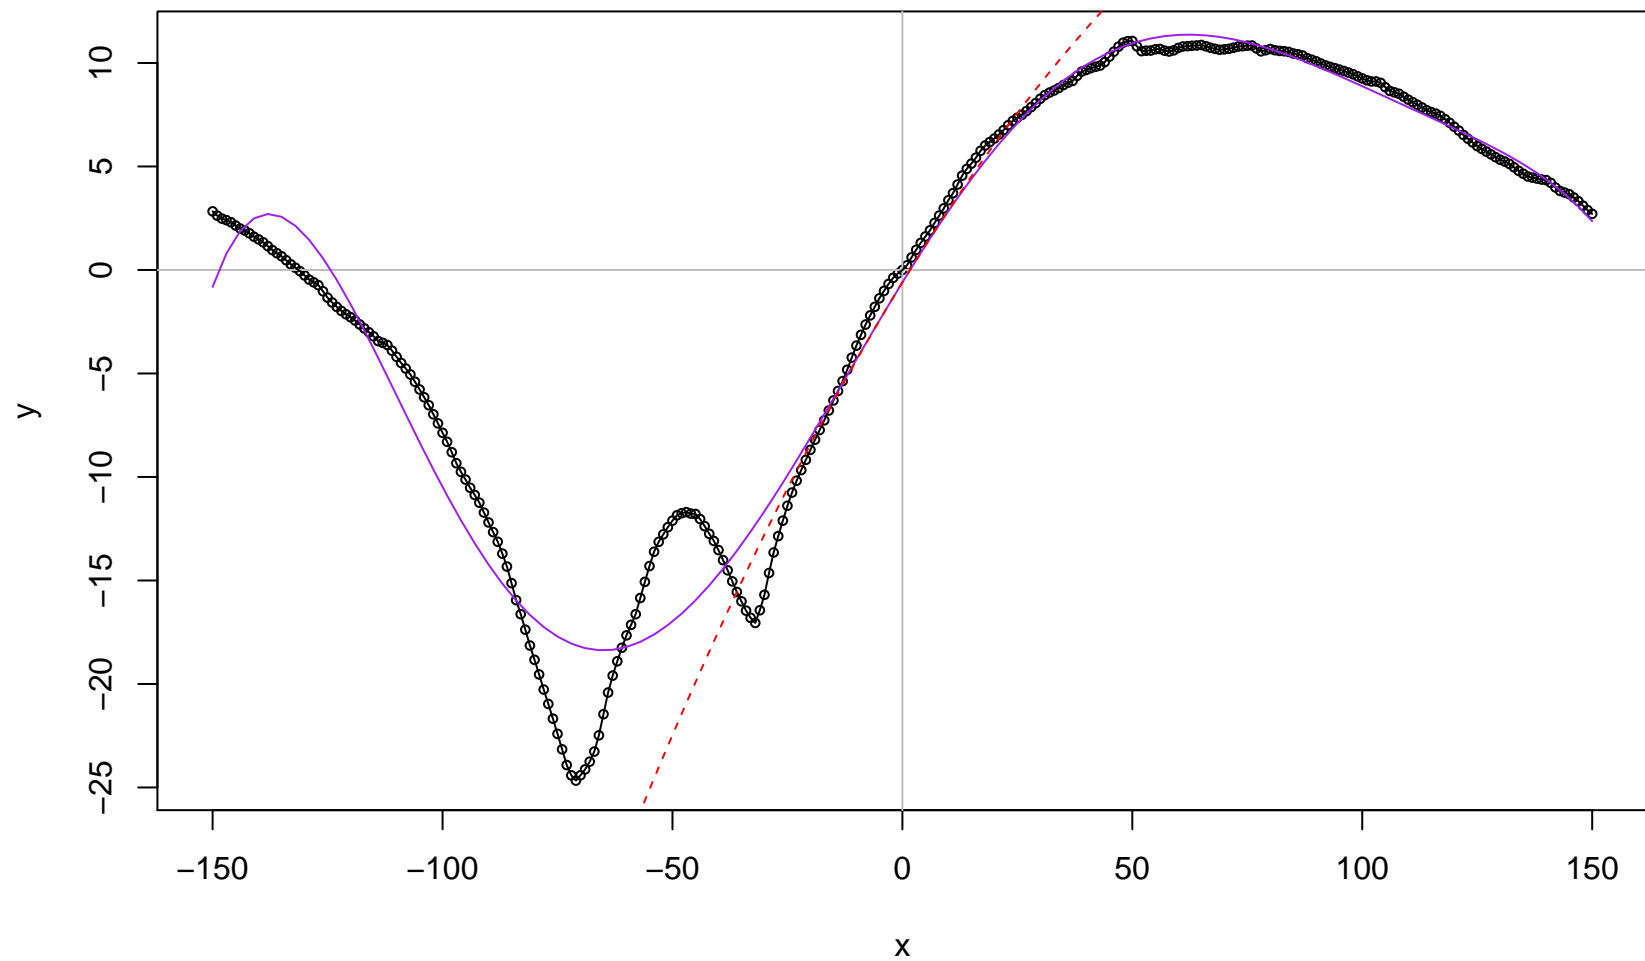

Site 180

$K*100= 1.0614$

$R^2= 0.9638$

radius= 94.2171

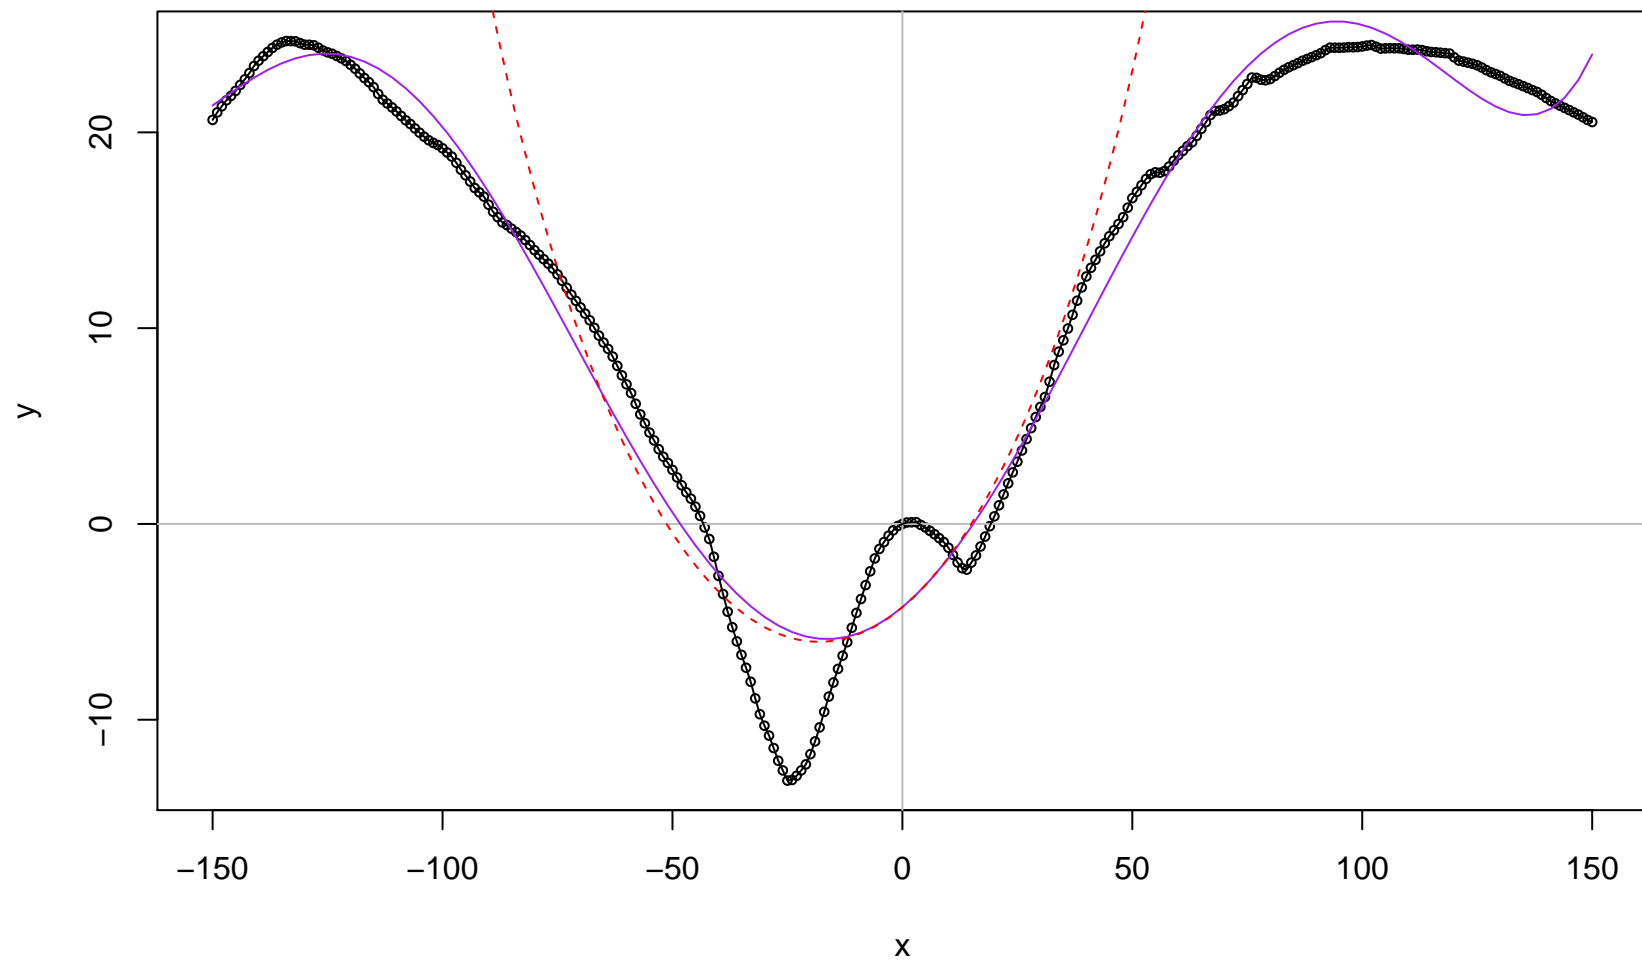

Site 181

$K*100 = -0.401$

$R^2 = 0.8639$

radius = -249.3657

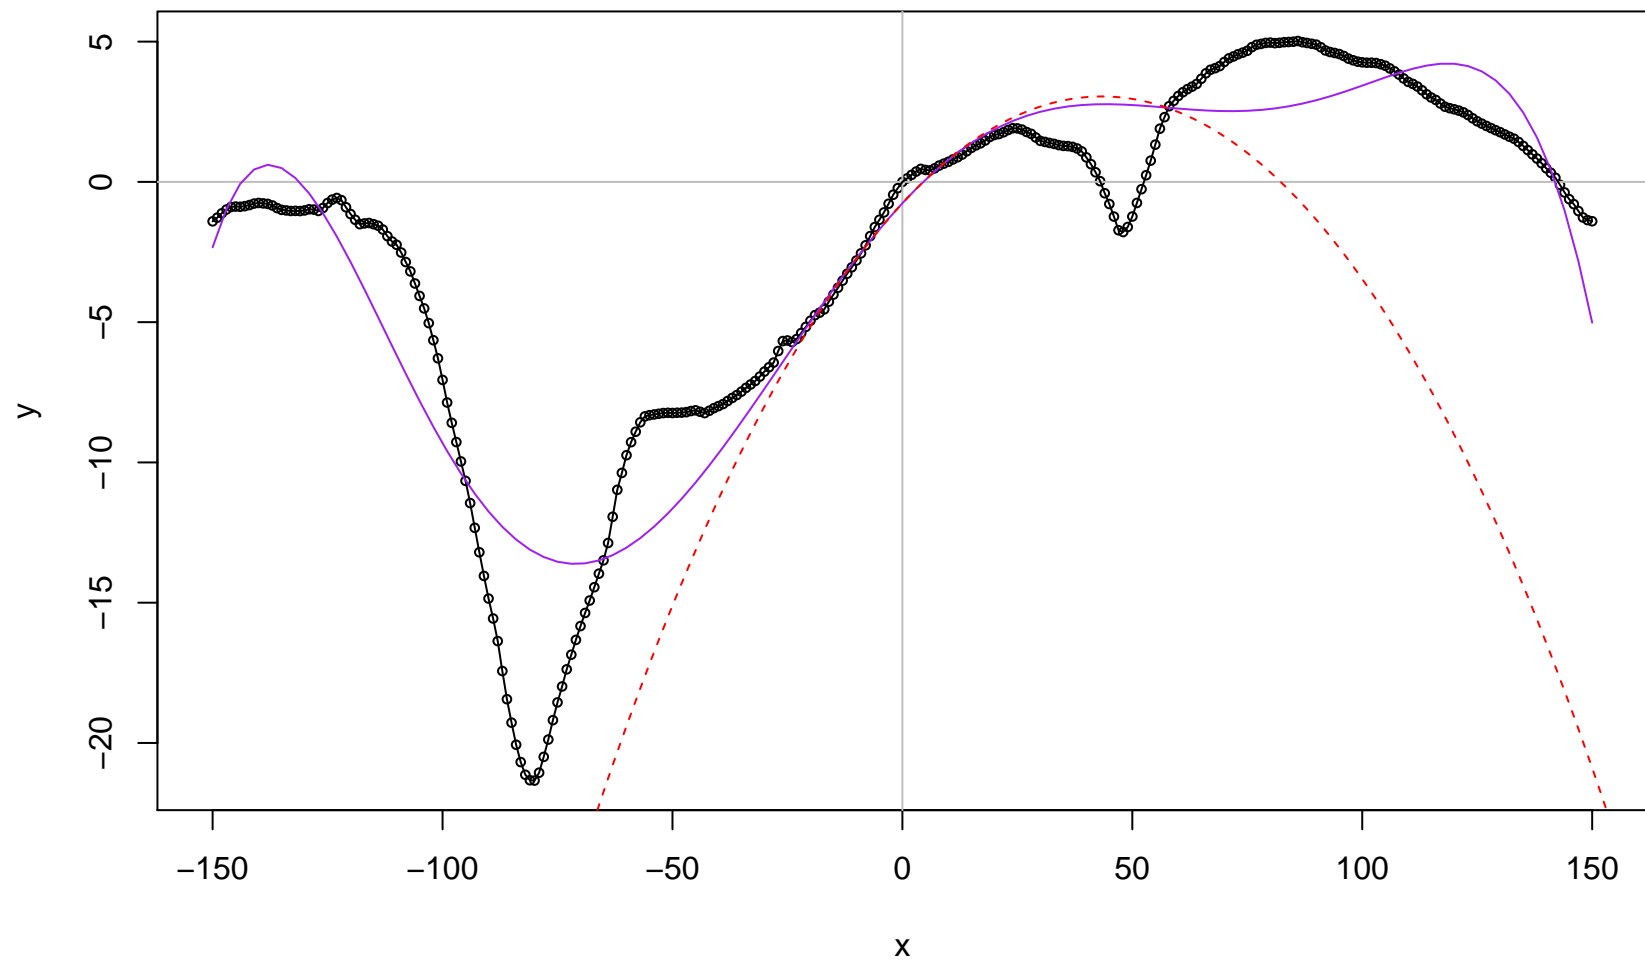

Site 182

$K*100 = -0.1878$

$R^2 = 0.7606$

radius = -532.3664

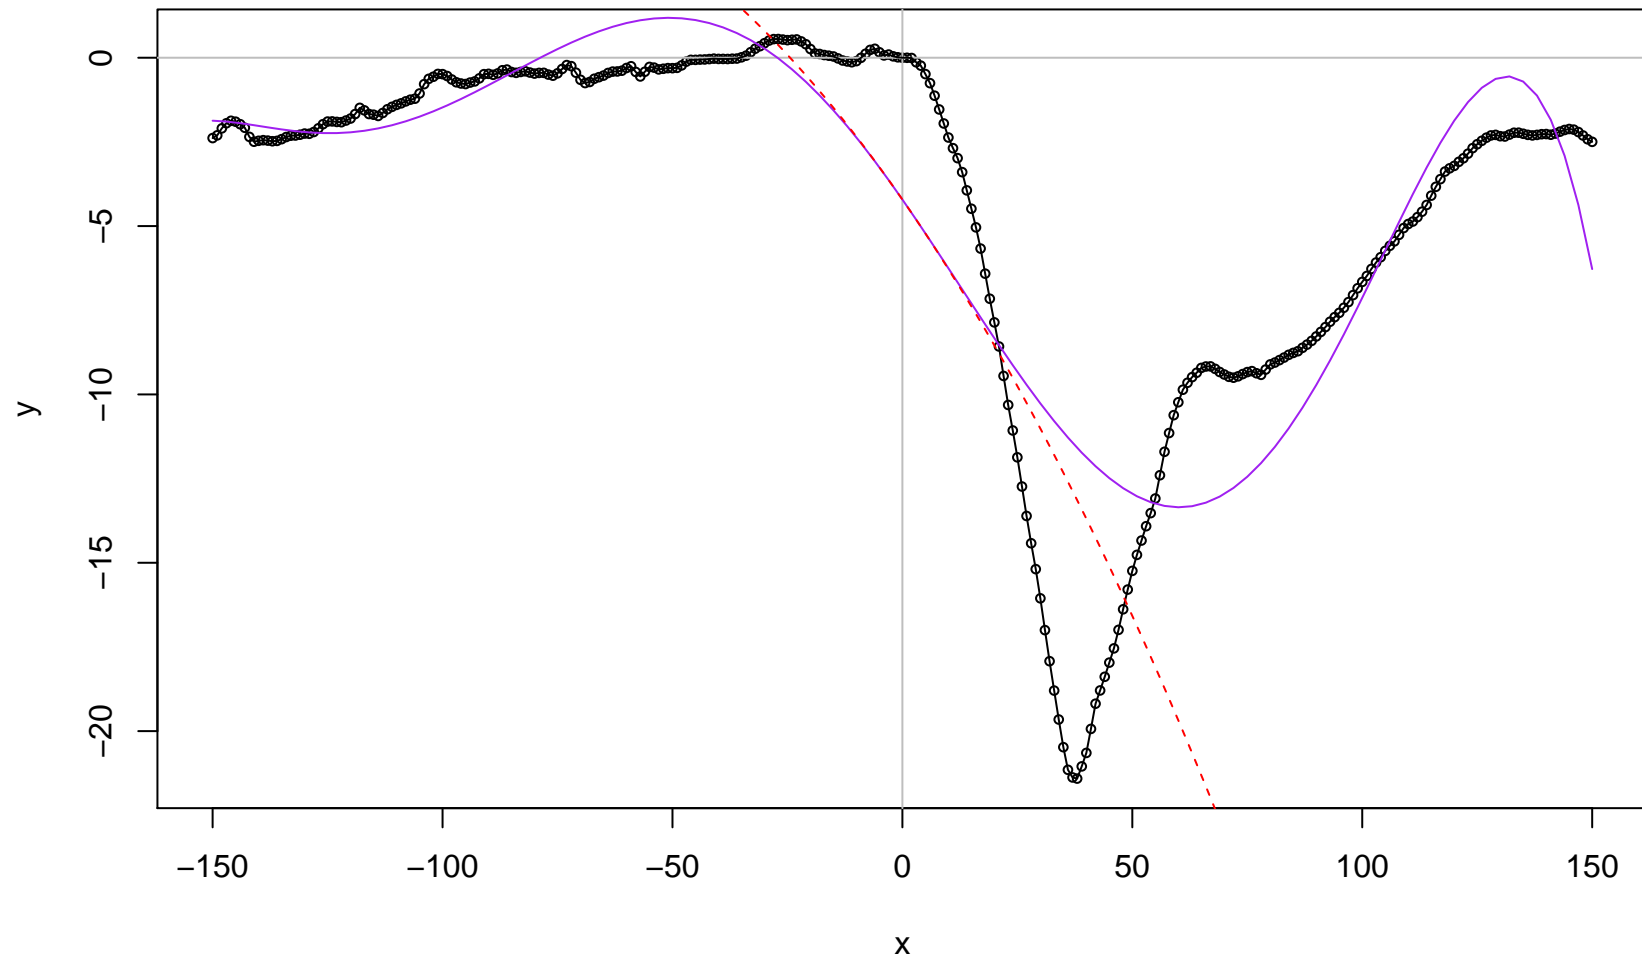

Site 183

$K \cdot 100 = 0.0342$

$R^2 = 0.9954$

radius= 2923.1553

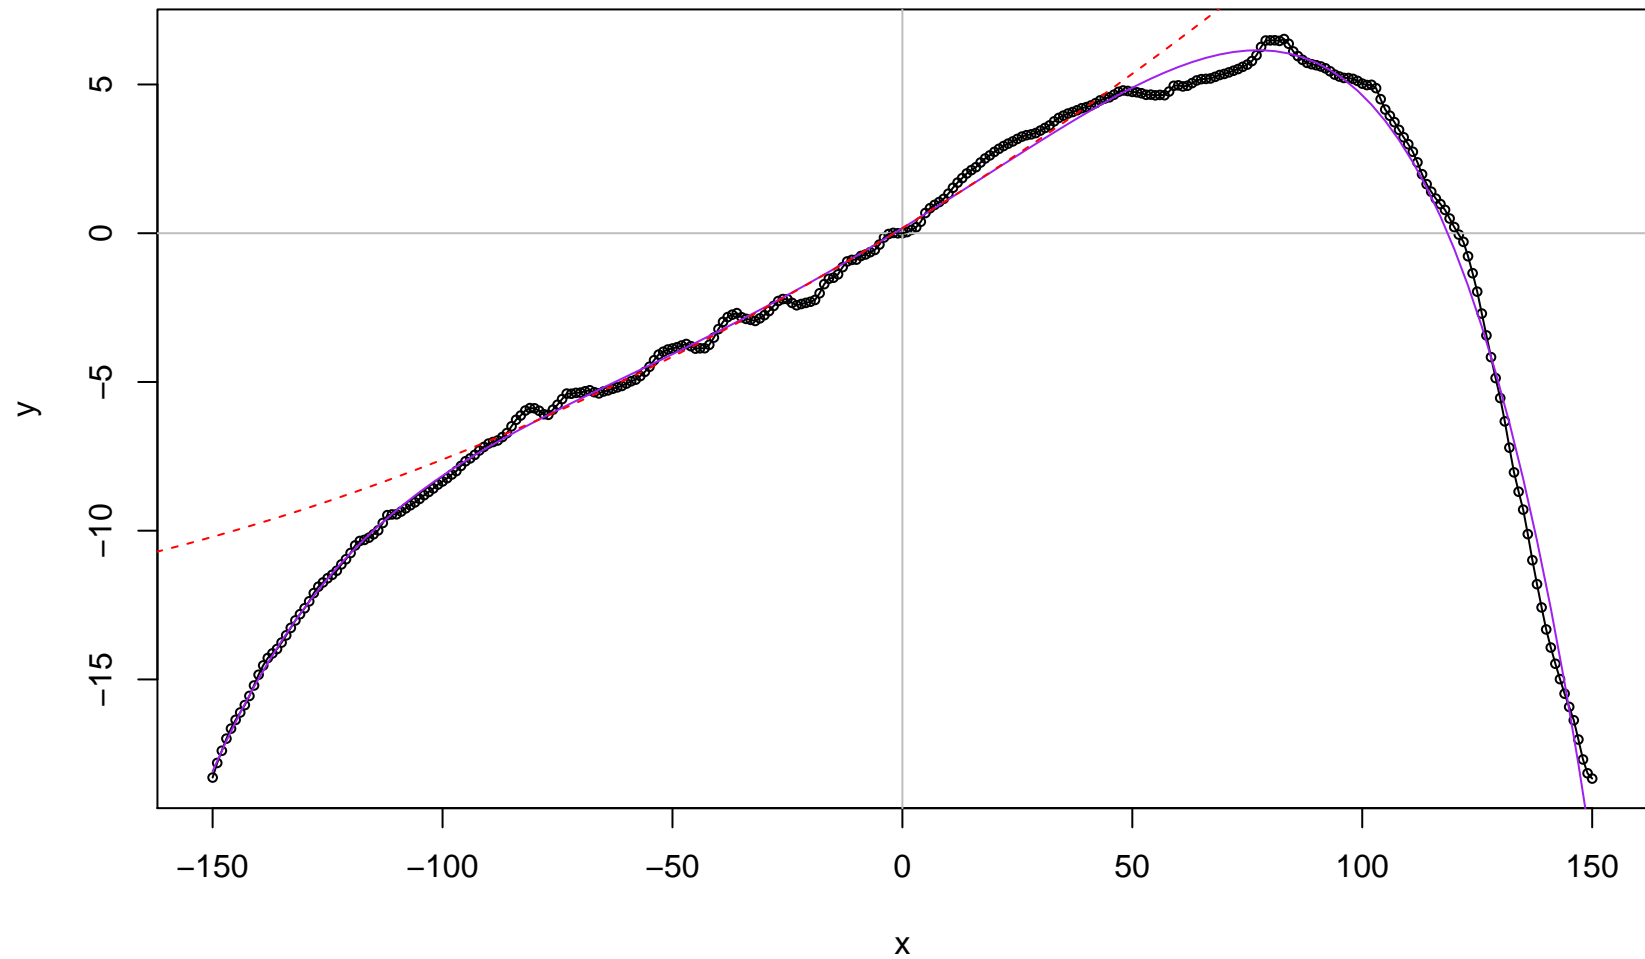

Site 184

$K*100= 0.2046$

$R^2= 0.9386$

radius= 488.8556

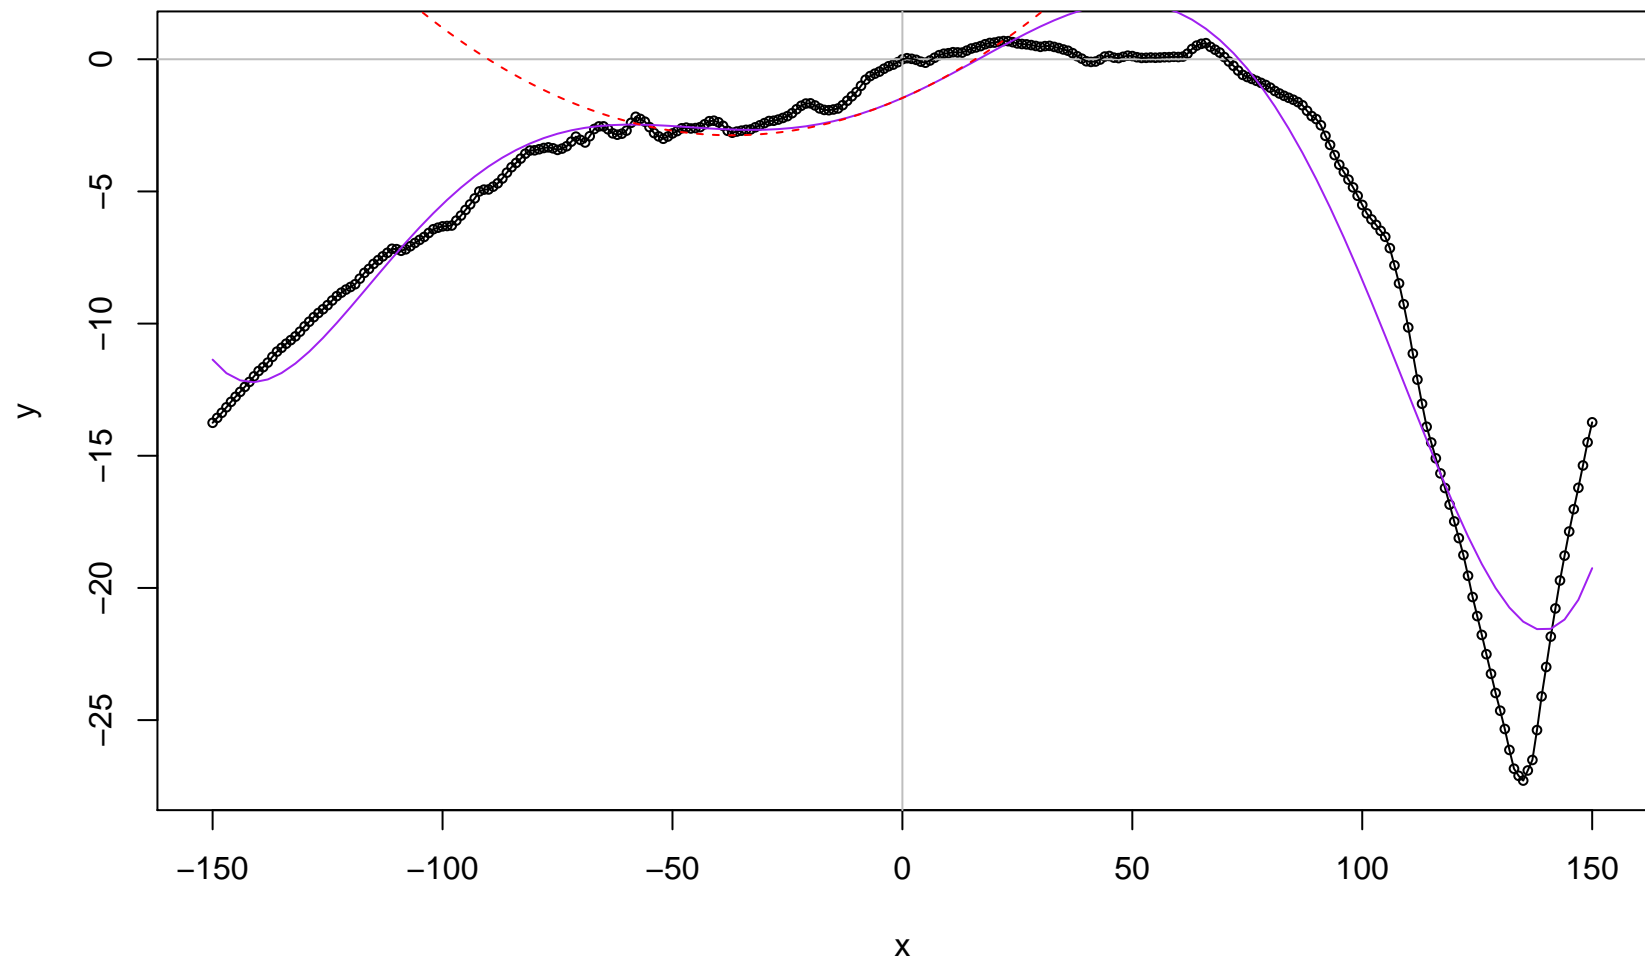



Site 185

$K \cdot 100 = 0.0068$

$R^2 = 0.9047$

radius= 14749.8894

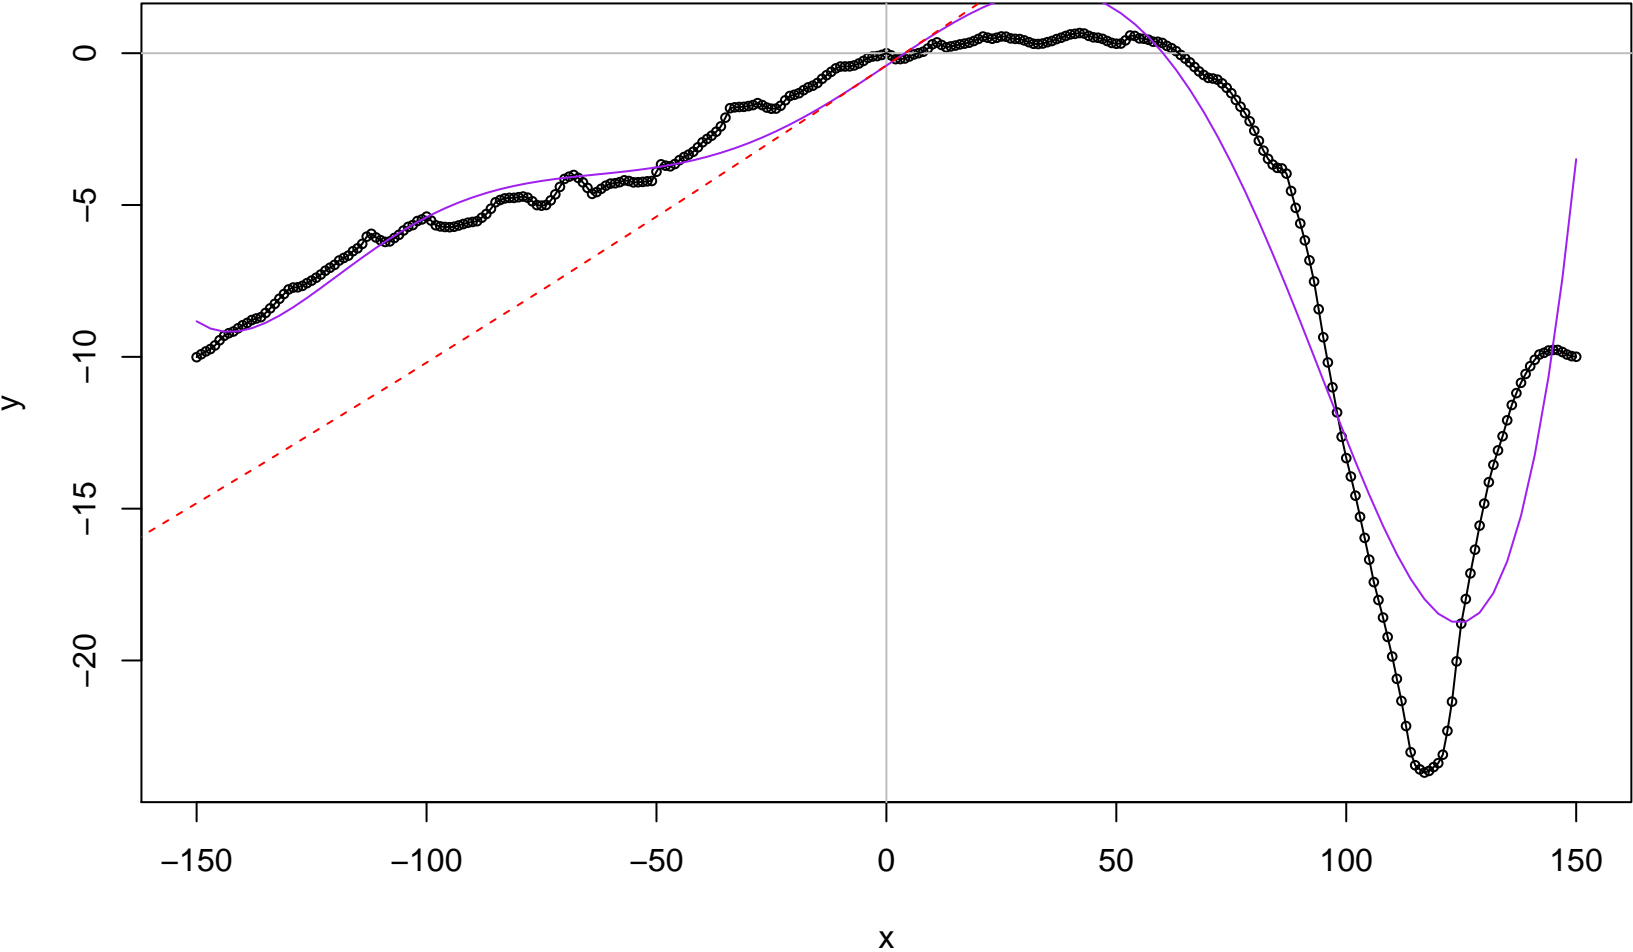

Site 186

$K \cdot 100 = 0.4974$

$R^2 = 0.9476$

radius= 201.0552

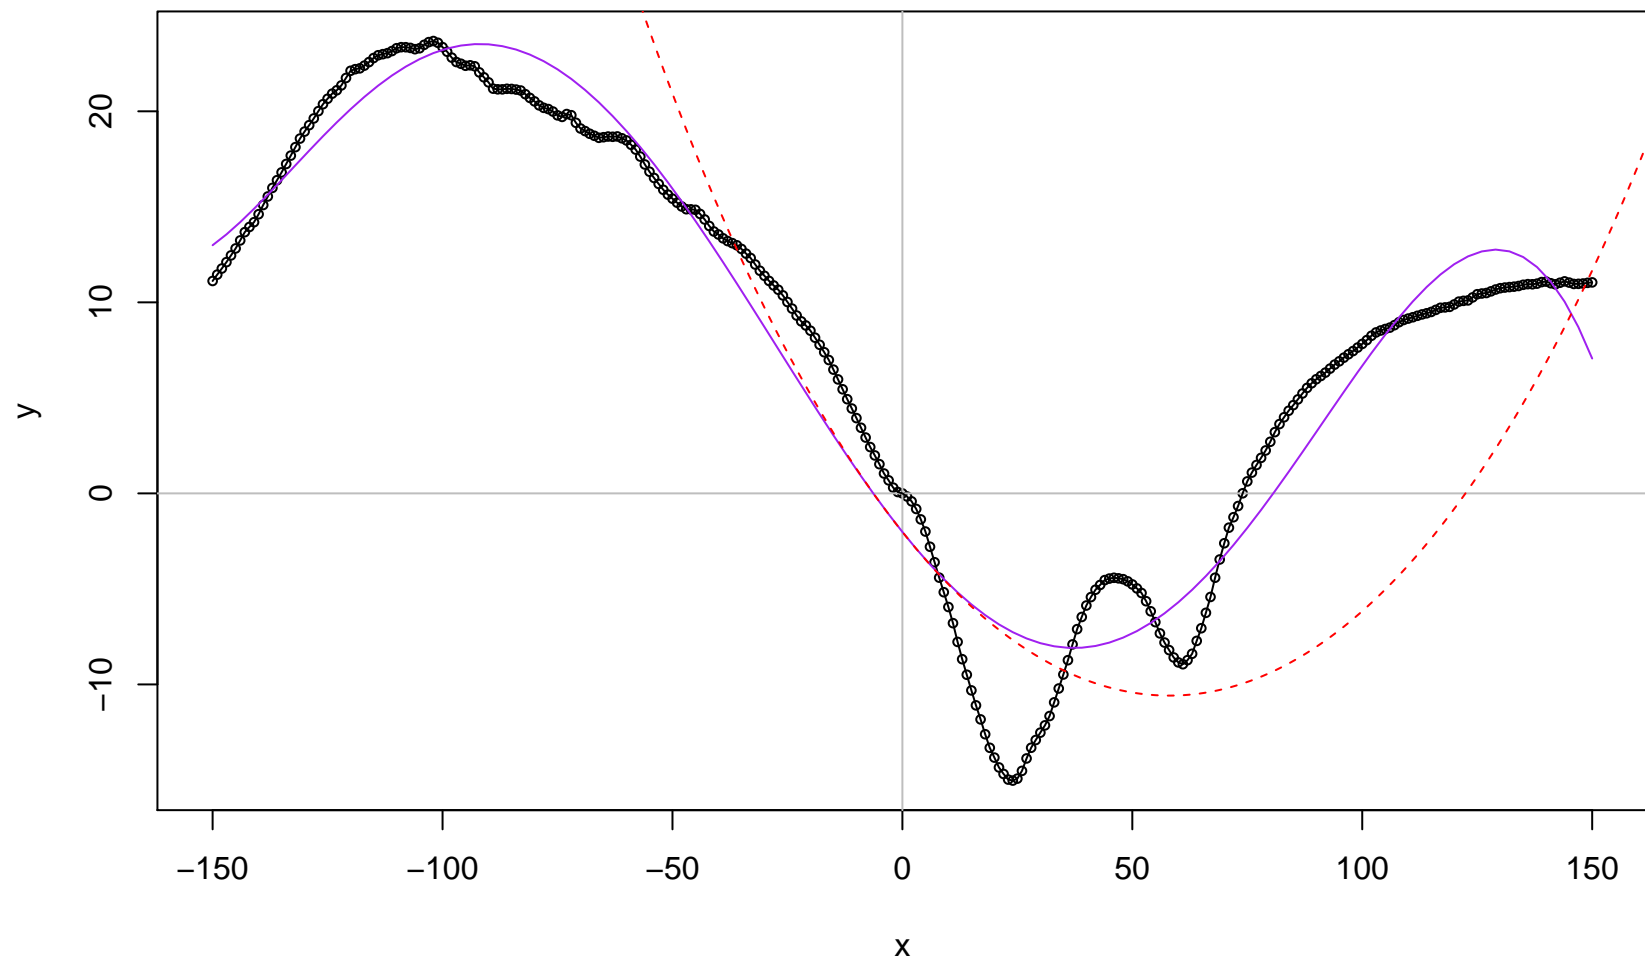

Site 187

$K*100= 1.1392$

$R^2= 0.9591$

radius= 87.7804

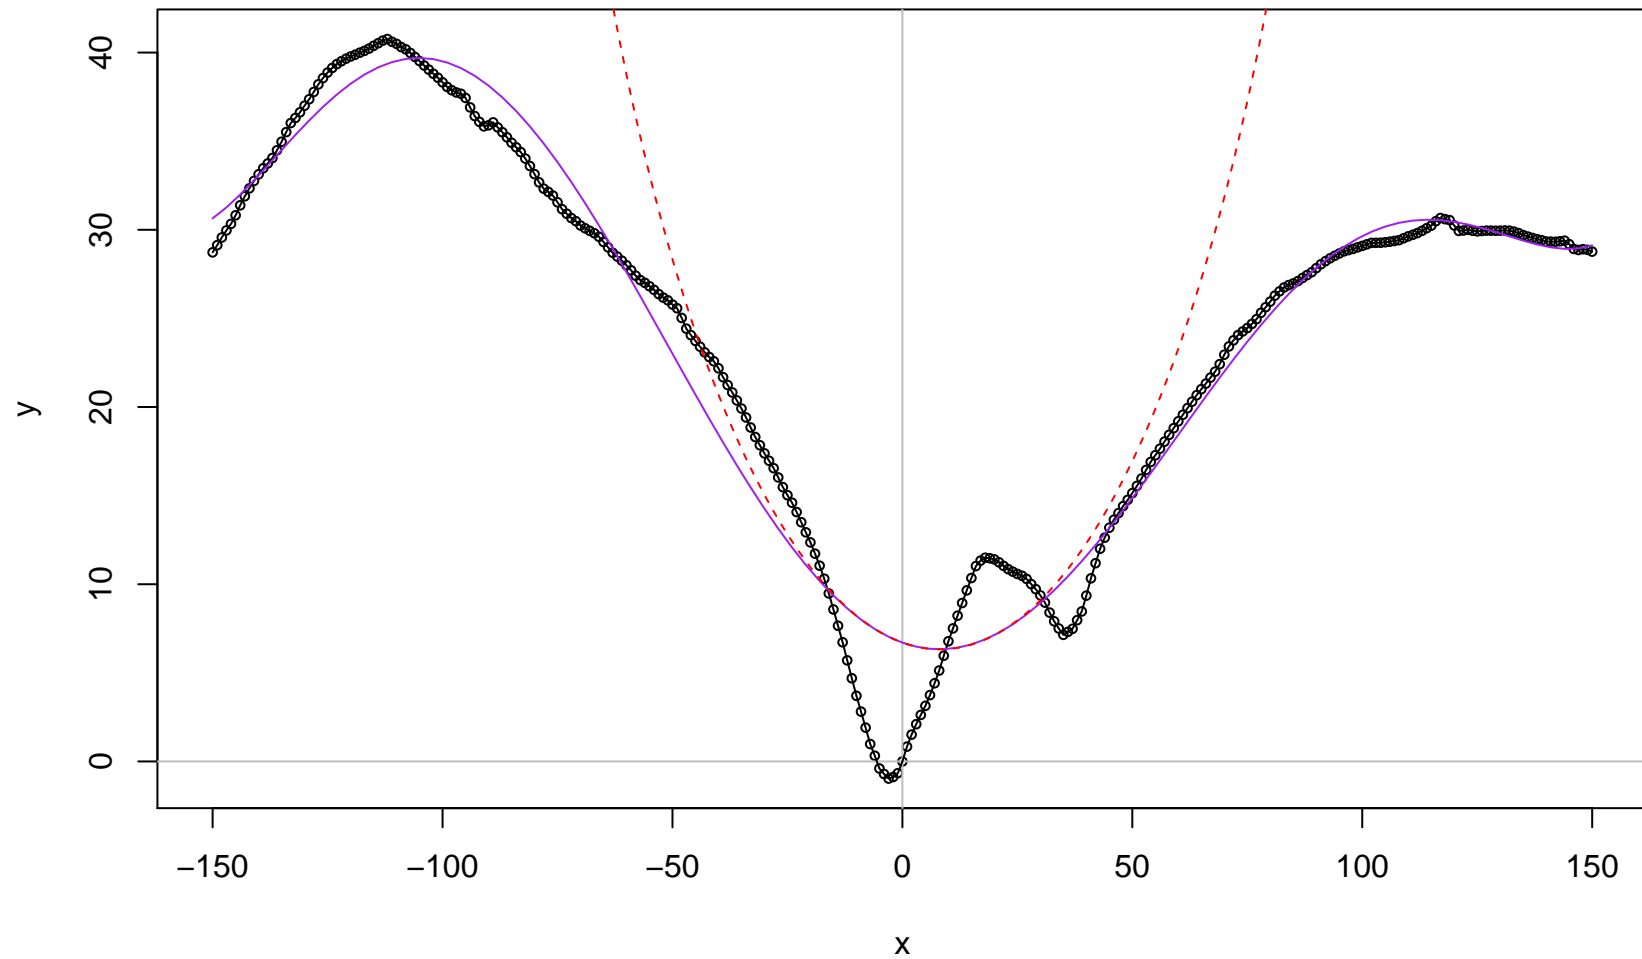

Site 188

$K*100 = -0.1632$

$R^2 = 0.9833$

radius= -612.7682

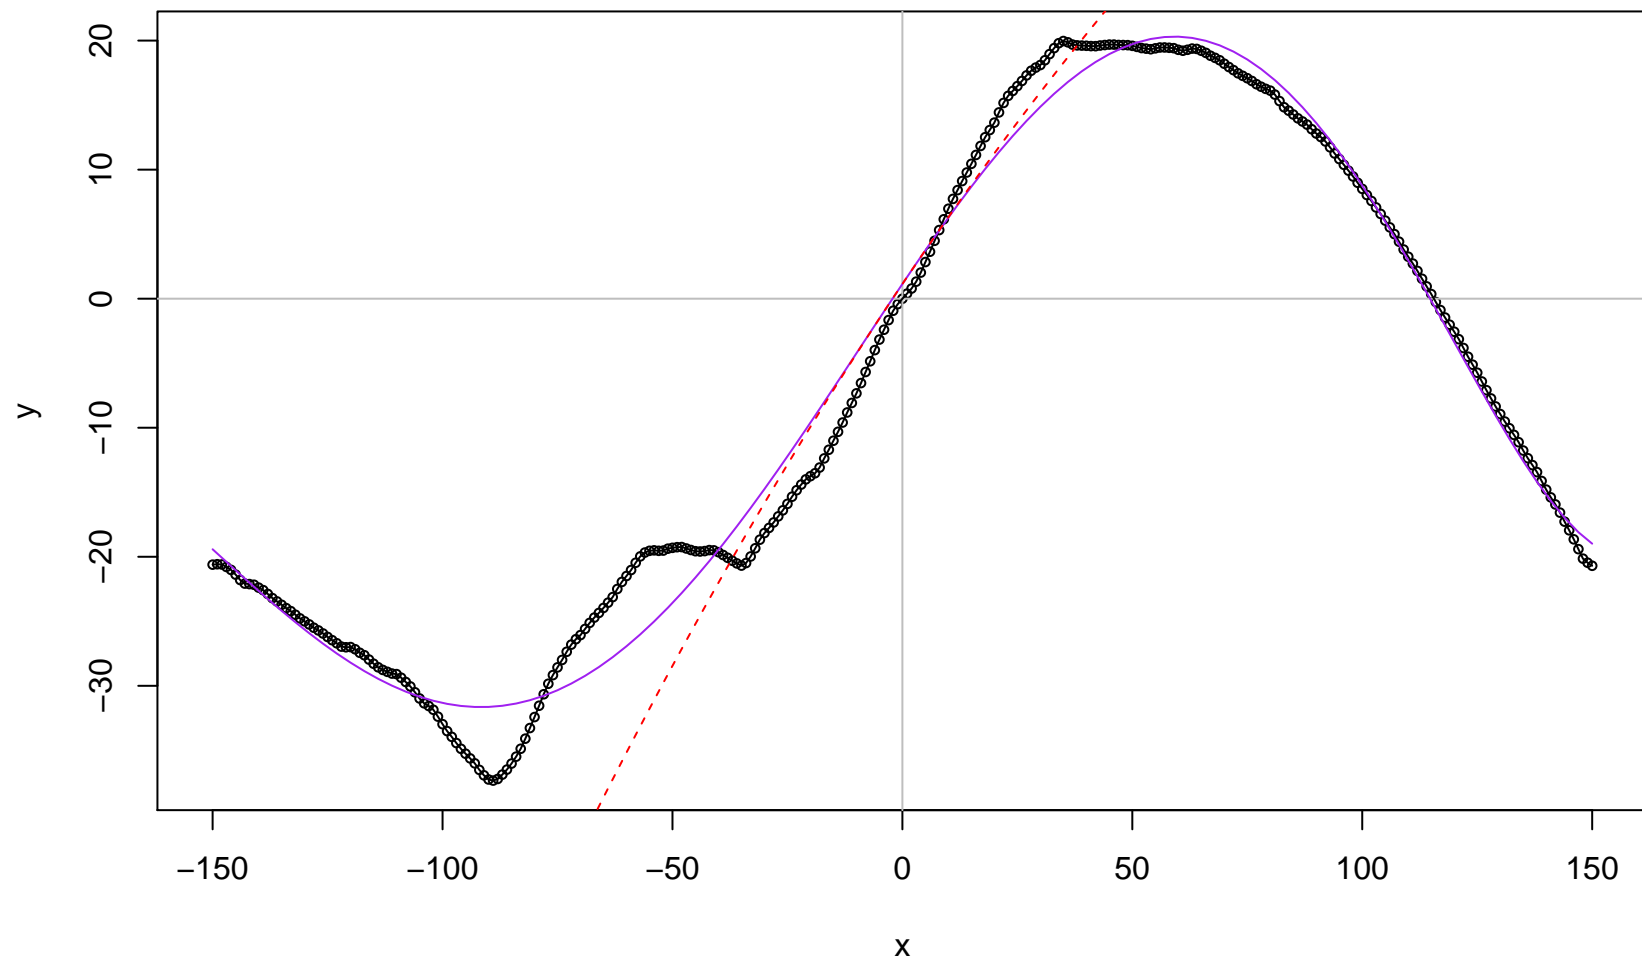

Site 189

$K*100= 0.2523$

$R^2= 0.9719$

radius= 396.308

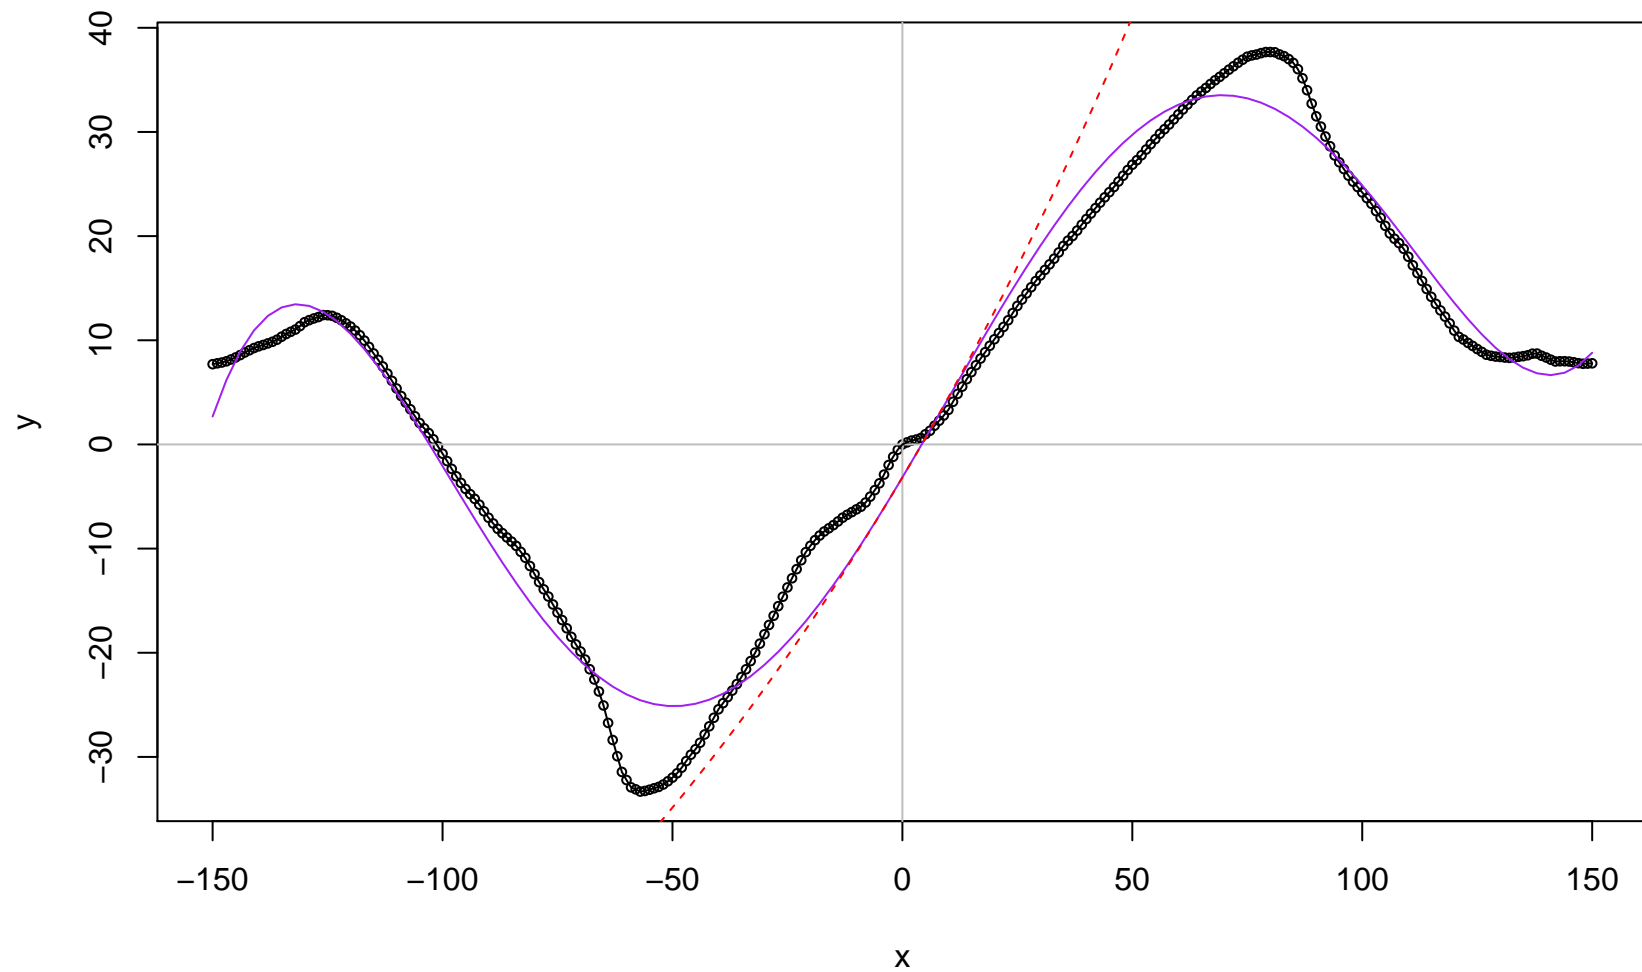

Site 190

$K \cdot 100 = 1.4881$

$R^2 = 0.971$

radius= 67.2003

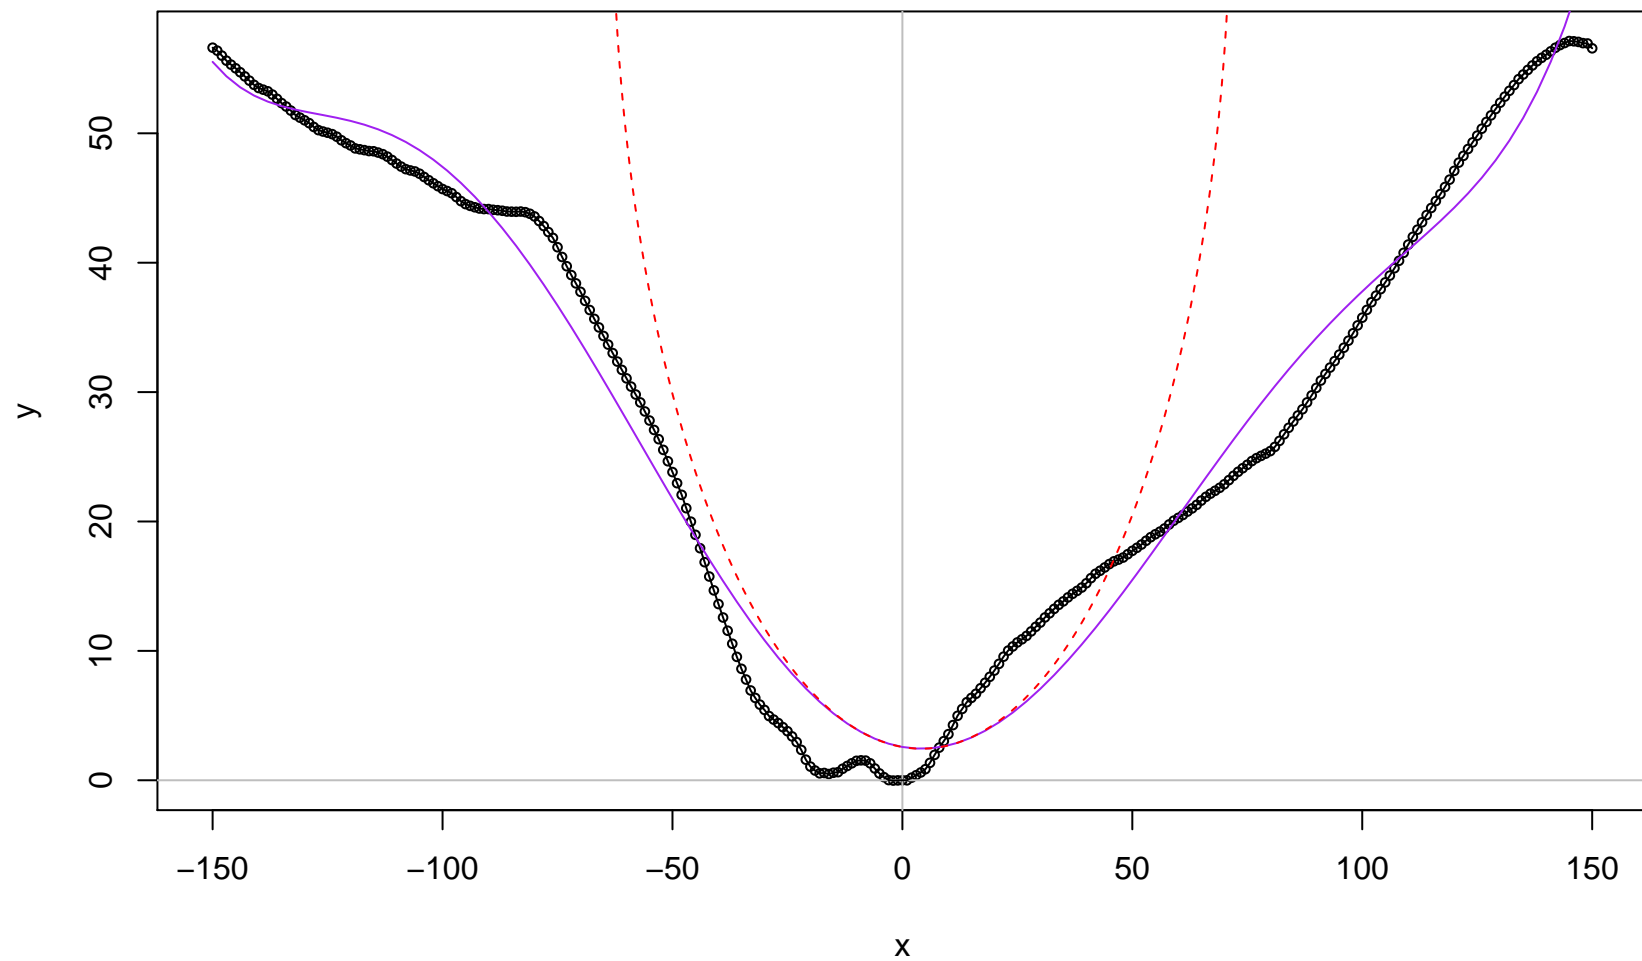

Site 191

$K*100= 0.2914$

$R^2= 0.8647$

radius= 343.1988

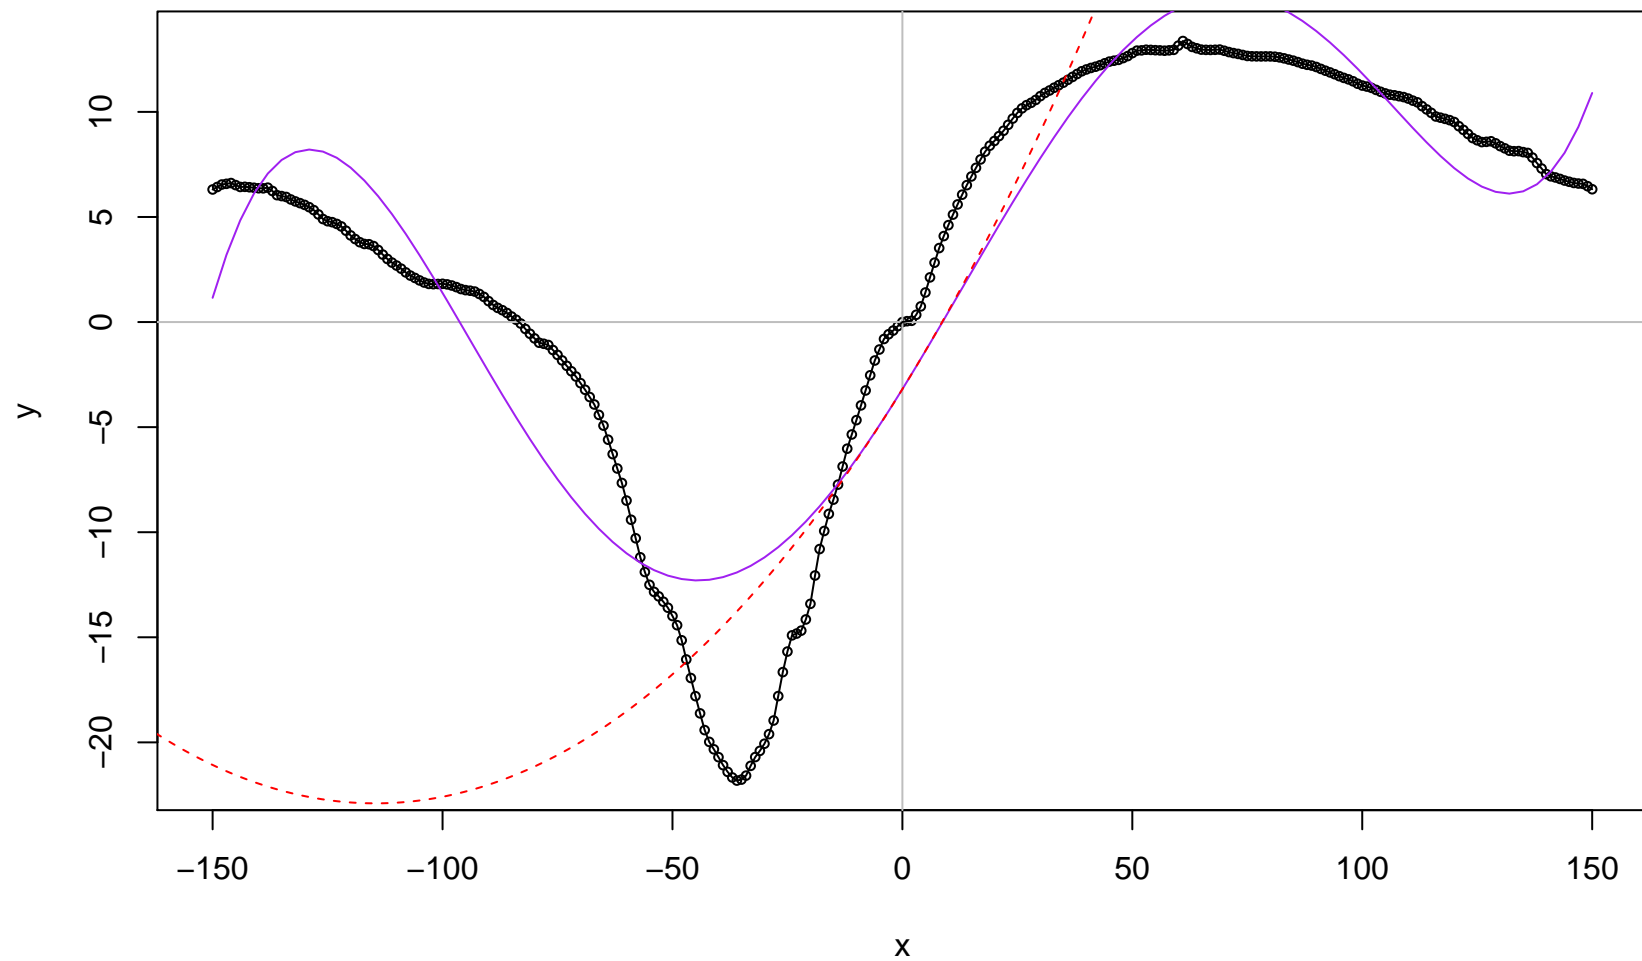

Site 192

$K*100 = -0.9141$

$R^2 = 0.9103$

radius = -109.3959

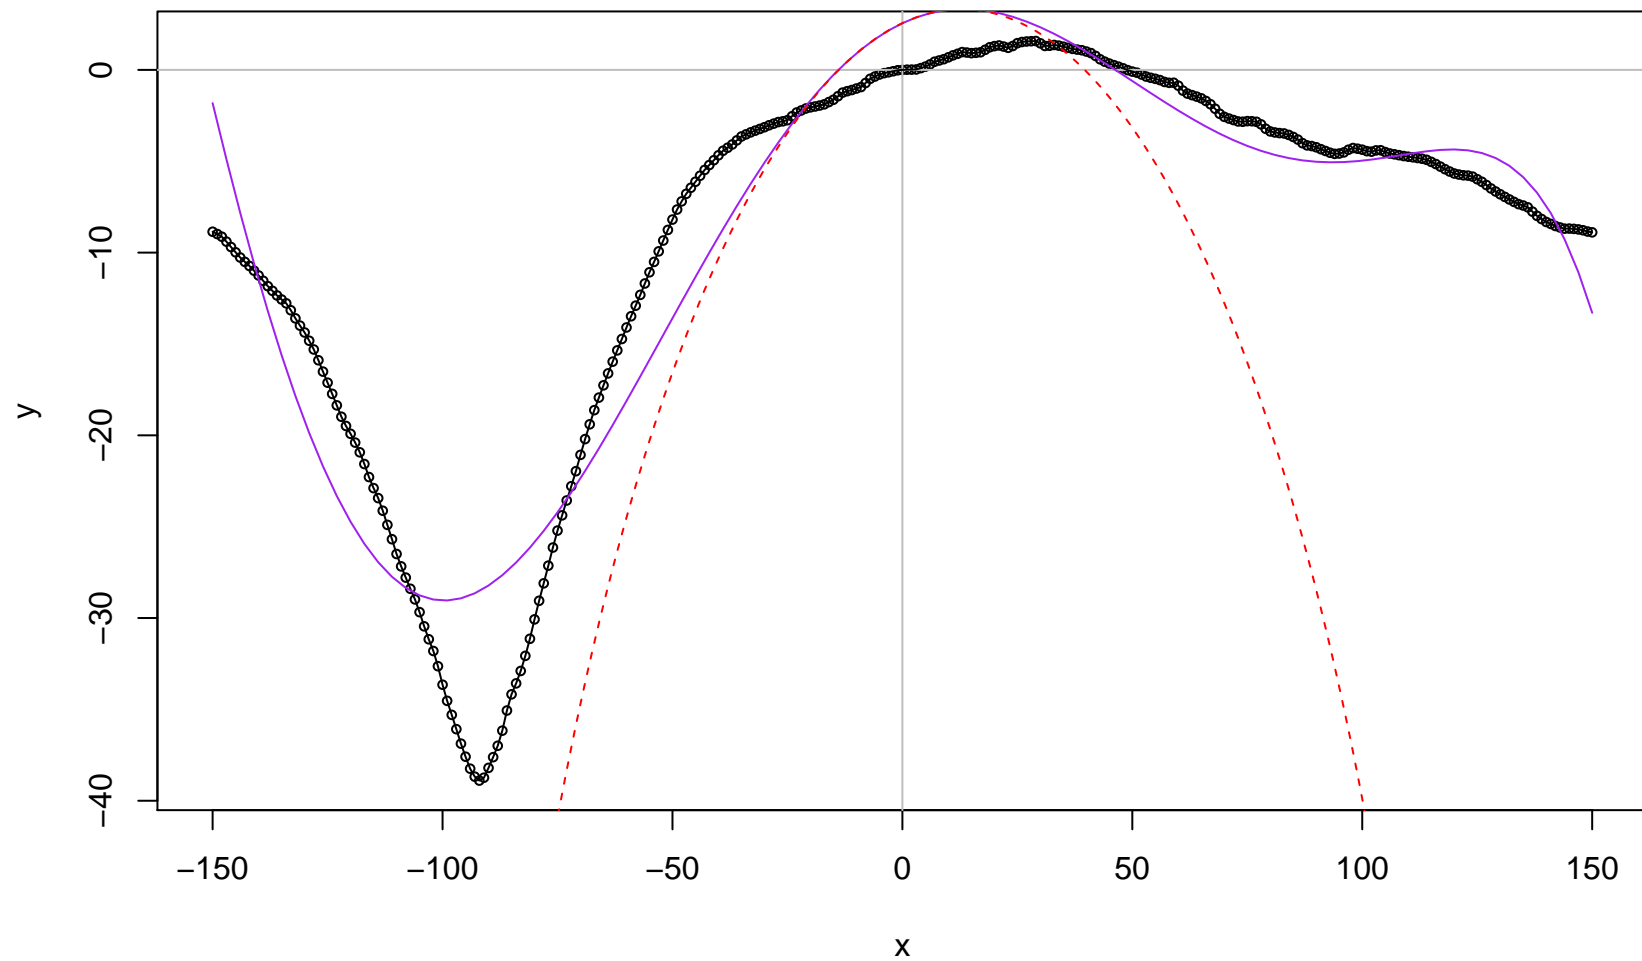



Site 193

$K*100= 2.1395$

$R^2= 0.9617$

radius= 46.7393

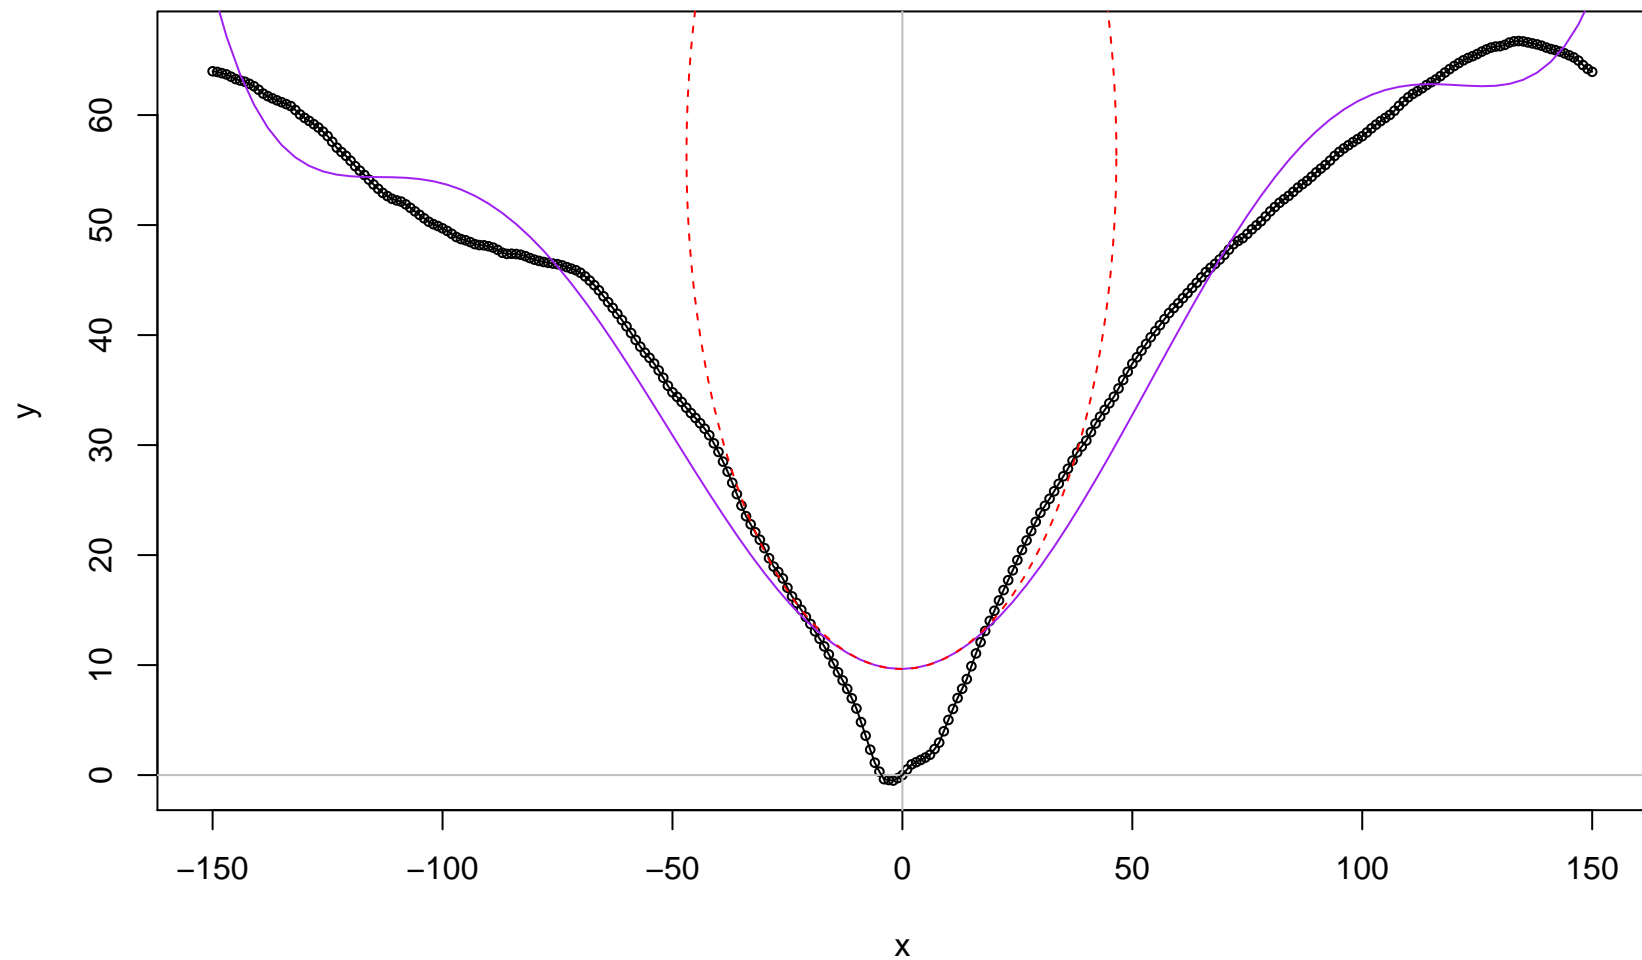

Site 194

$K \cdot 100 = 1.743$

$R^2 = 0.9799$

radius = 57.3735

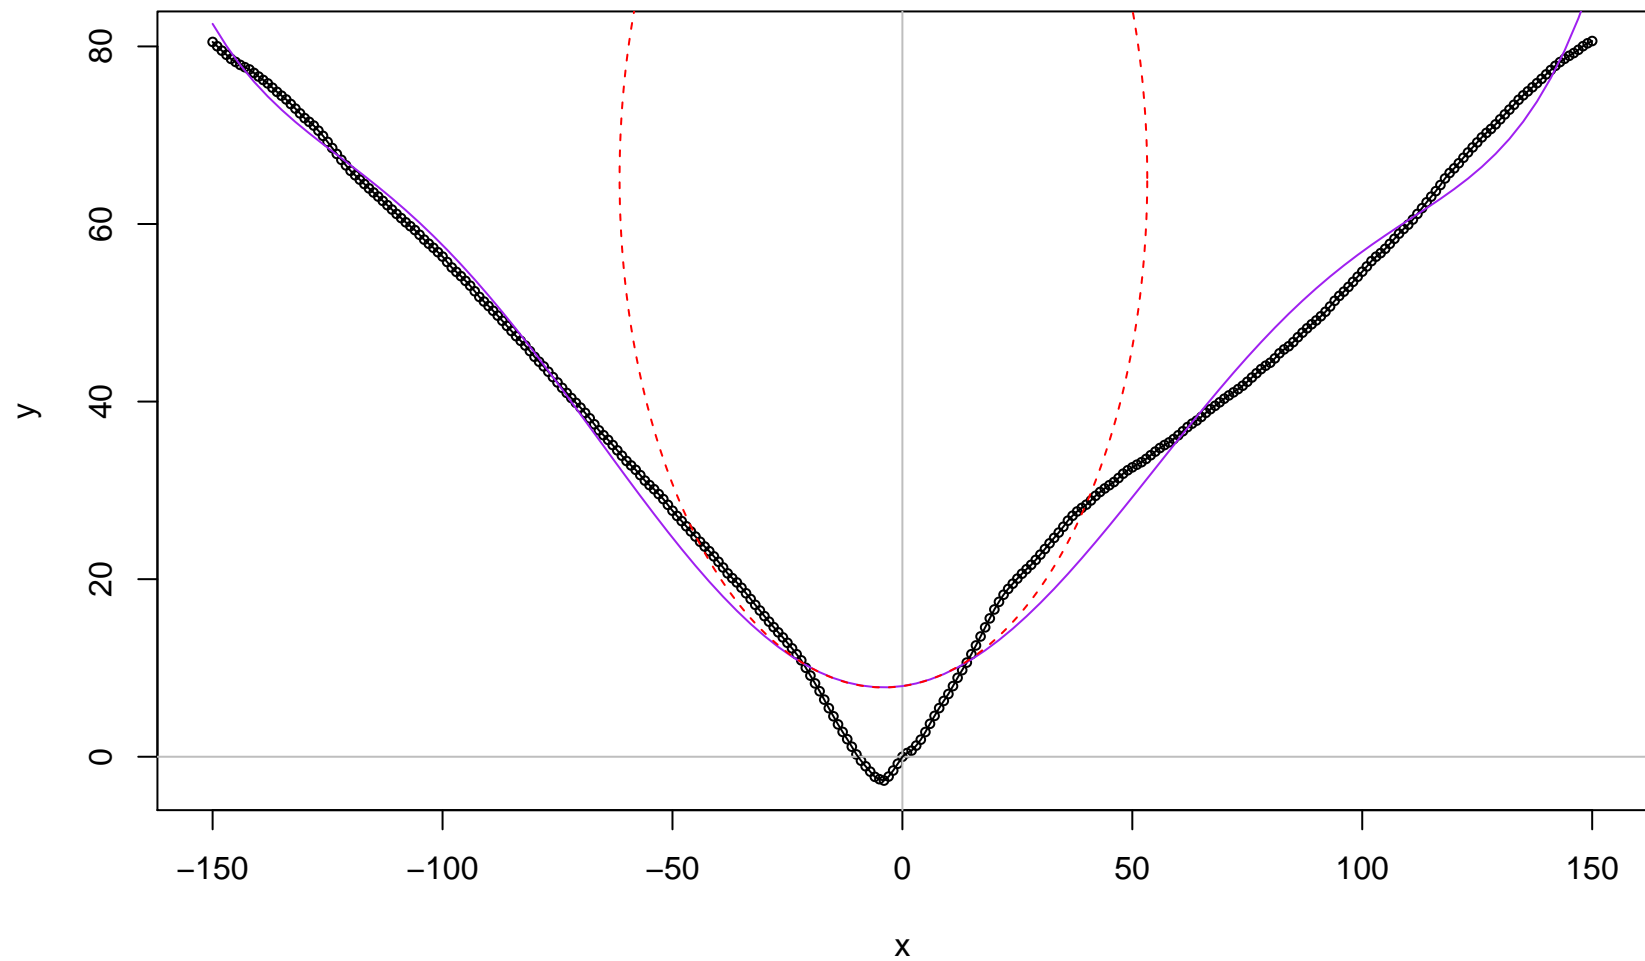

Site 195

$K \cdot 100 = 0.0169$

$R^2 = 0.9835$

radius = 5901.2594

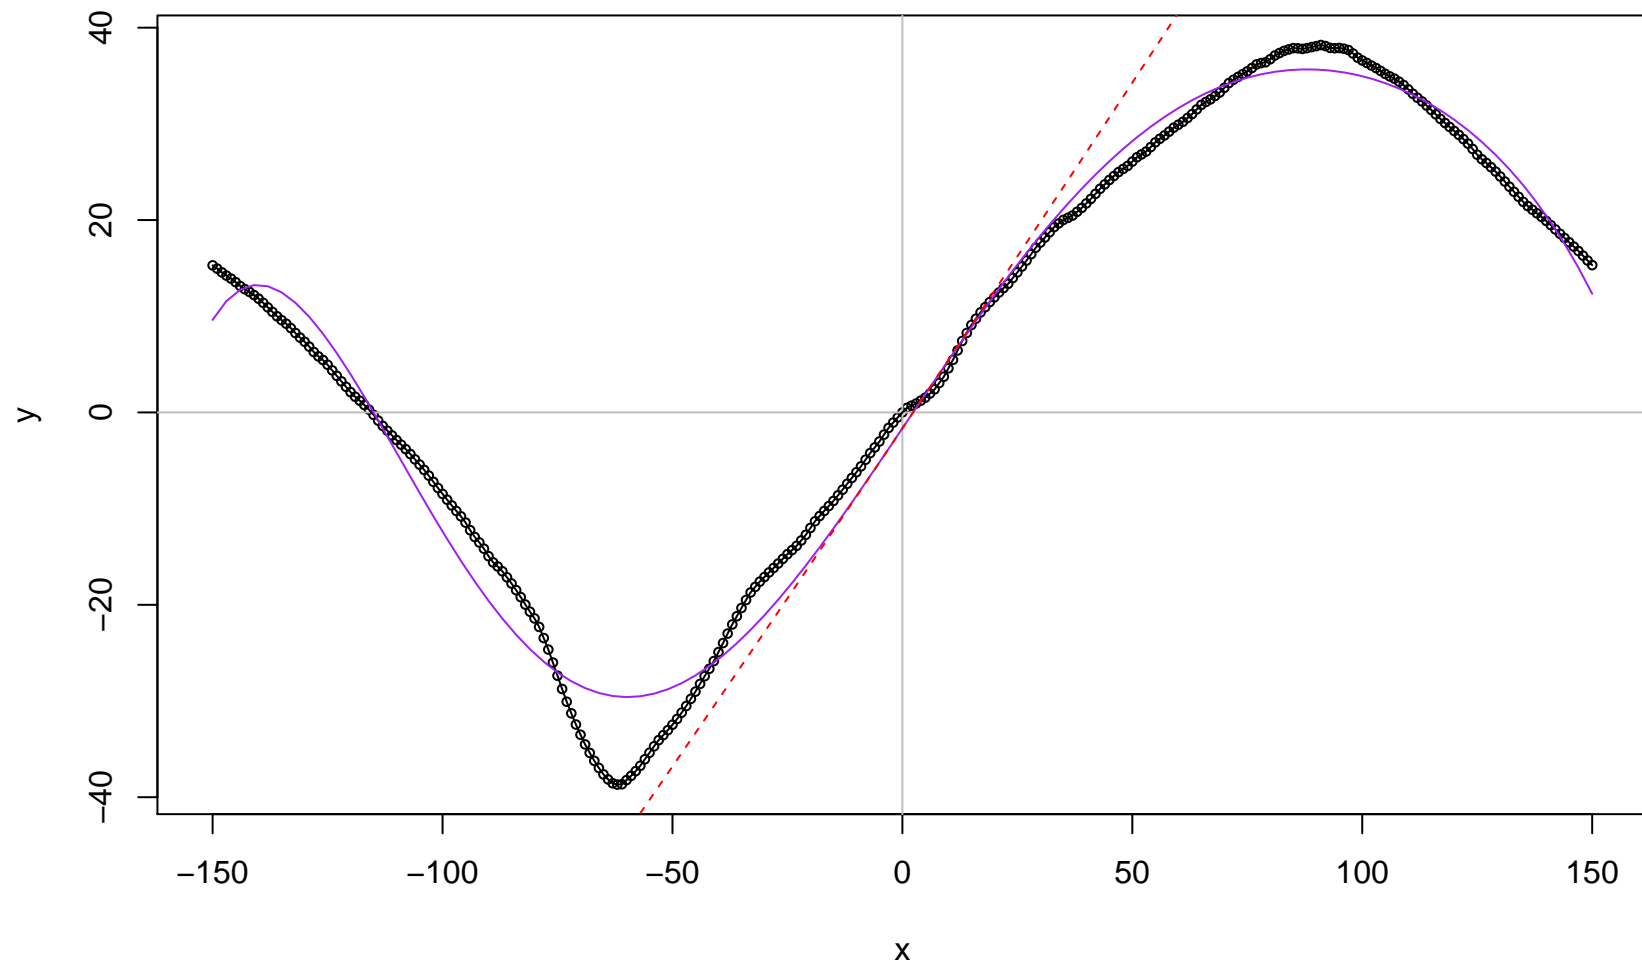

Site 196

$K \cdot 100 = 1.4444$

$R^2 = 0.9231$

radius = 69.233

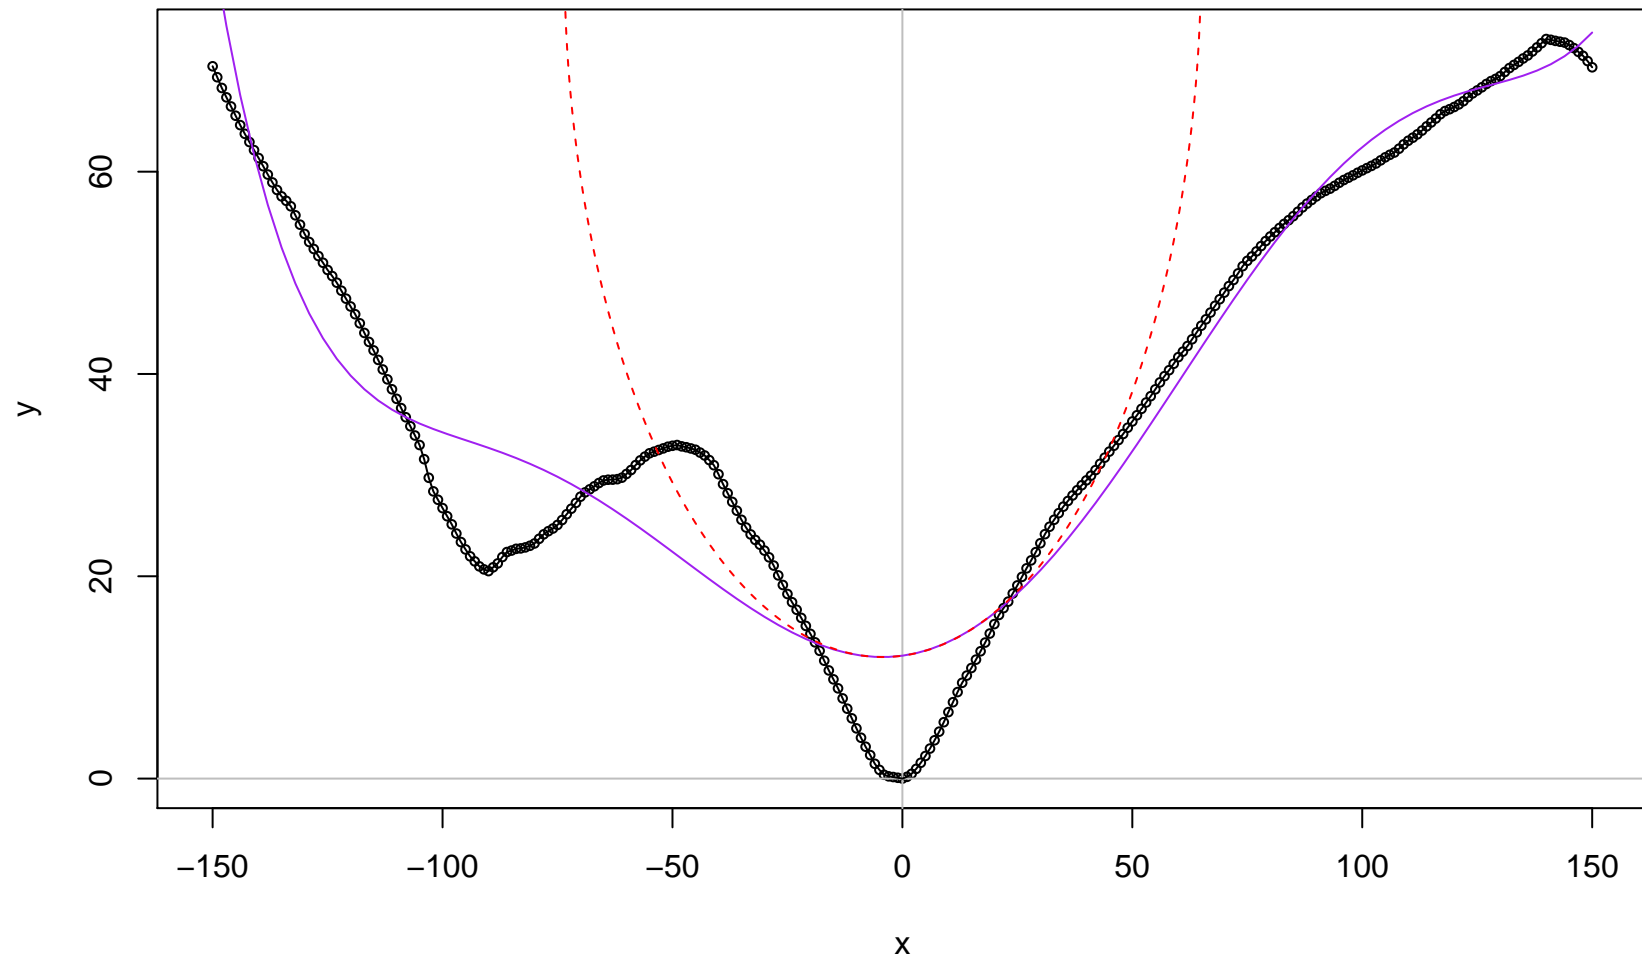

Site 197

$K \cdot 100 = 0.1077$

$R^2 = 0.9879$

radius= 928.9218

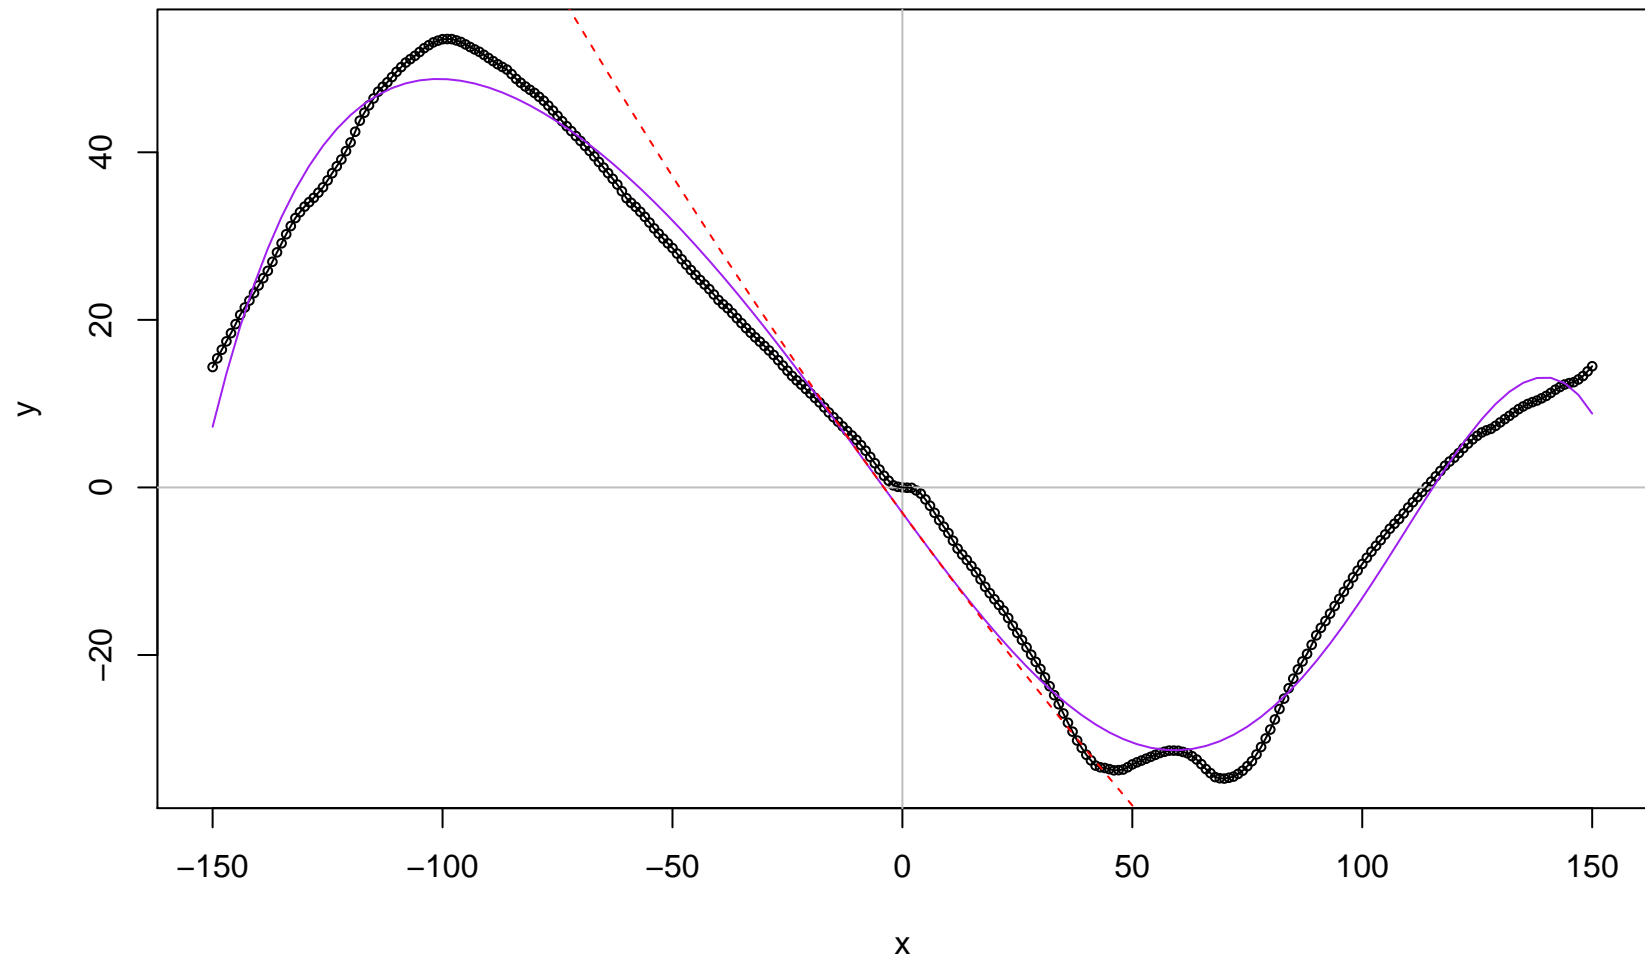

Site 198

$K*100 = -0.0295$

$R^2 = 0.8892$

radius = -3391.2565

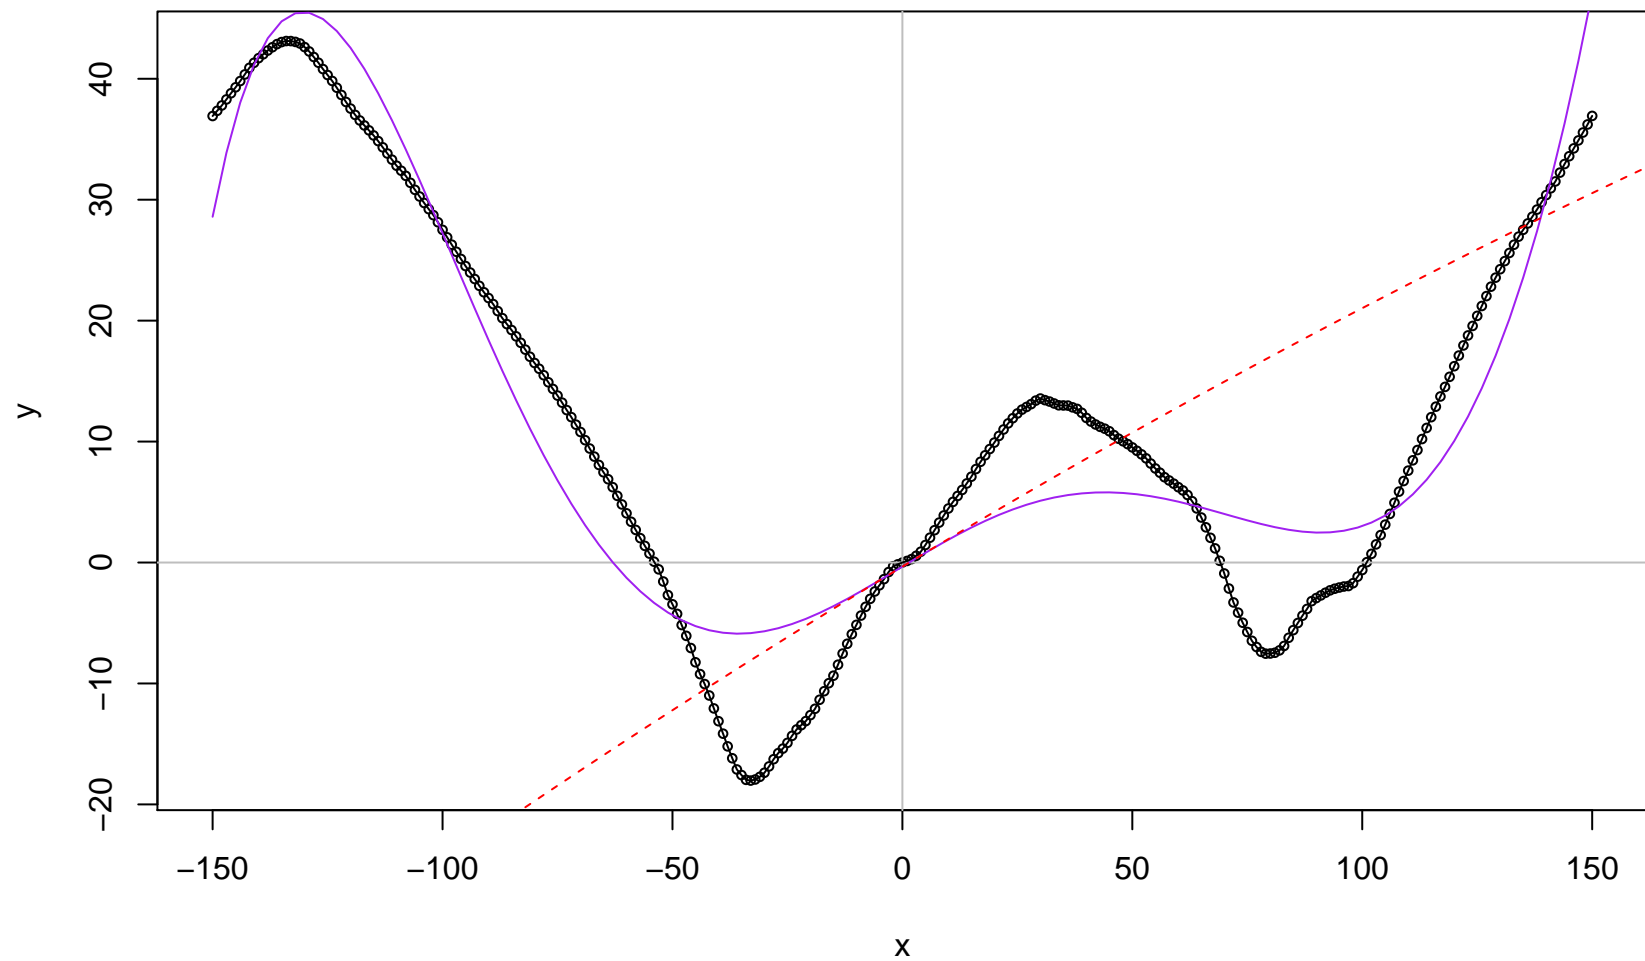

Site 199

$K*100= 0.9828$

$R^2= 0.9629$

radius= 101.7481

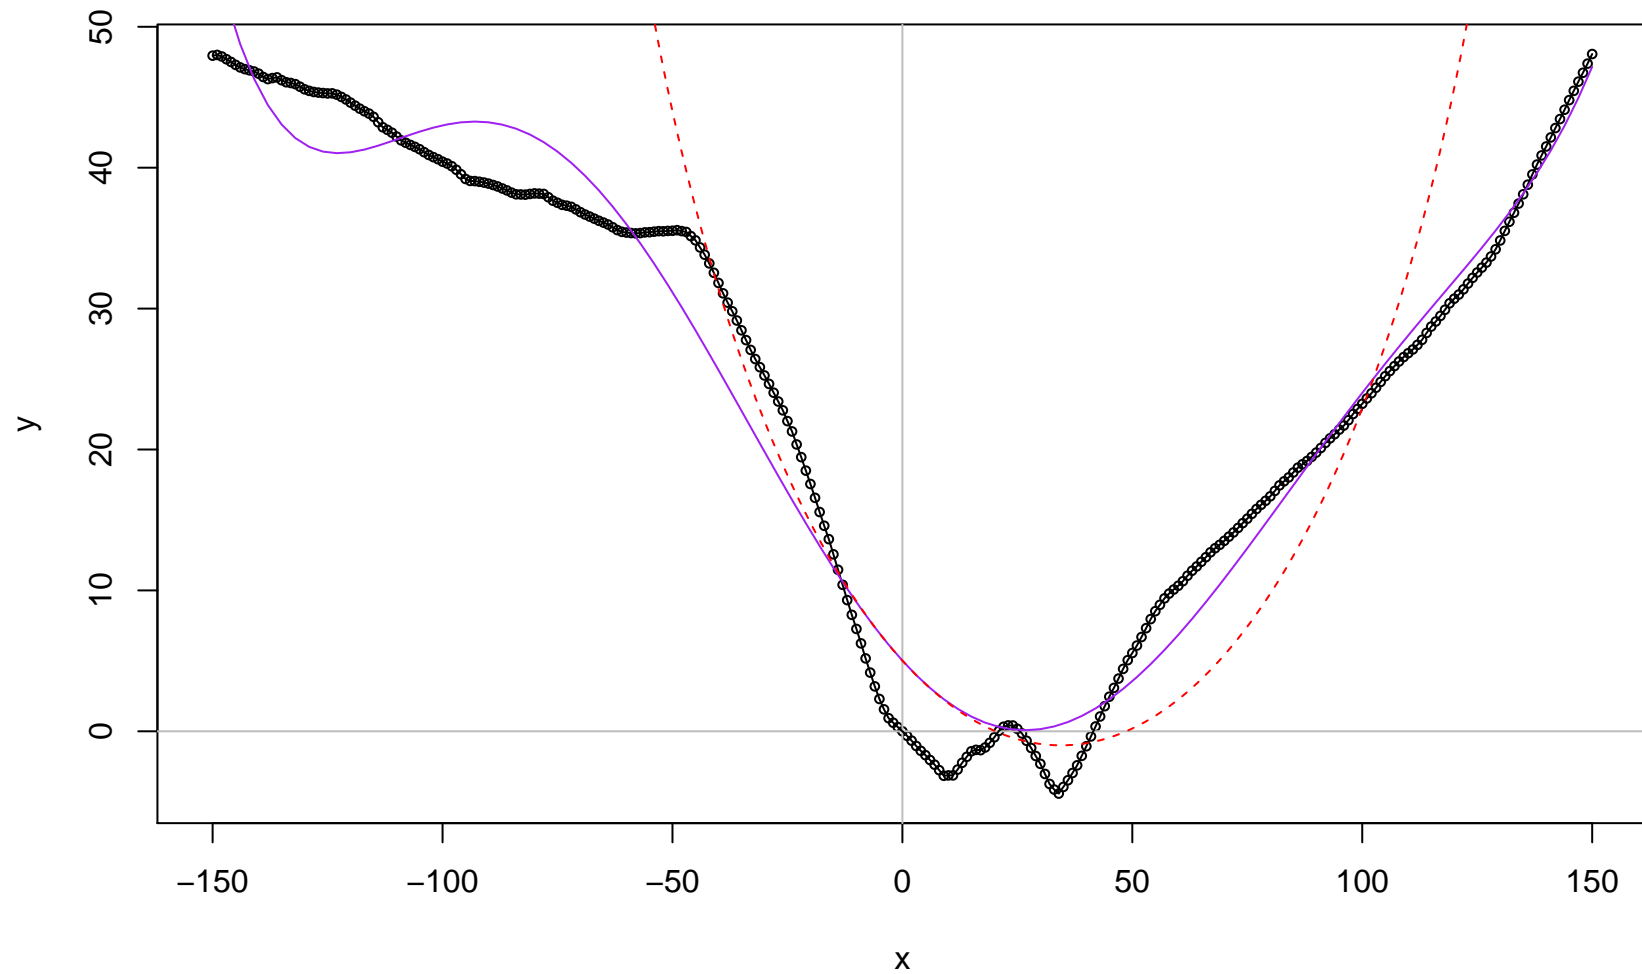

Site 200

$K \cdot 100 = -0.1726$

$R^2 = 0.9782$

radius=  $-579.3013$

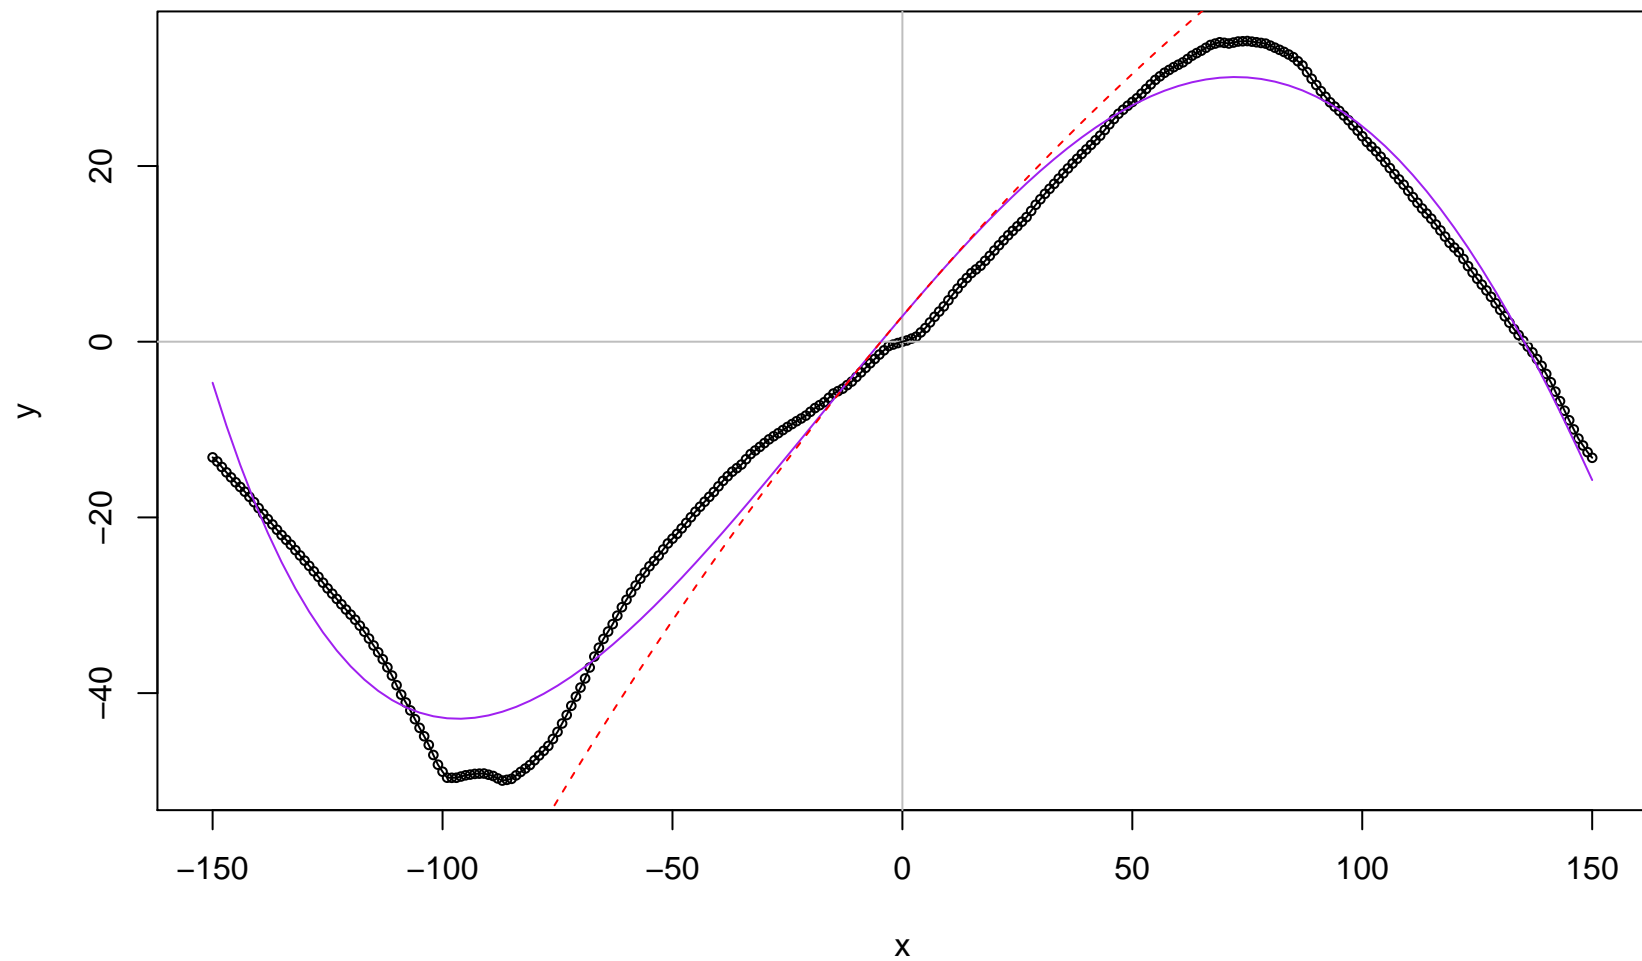



Site 201

$K \cdot 100 = 1.2268$

$R^2 = 0.9799$

radius = 81.5142

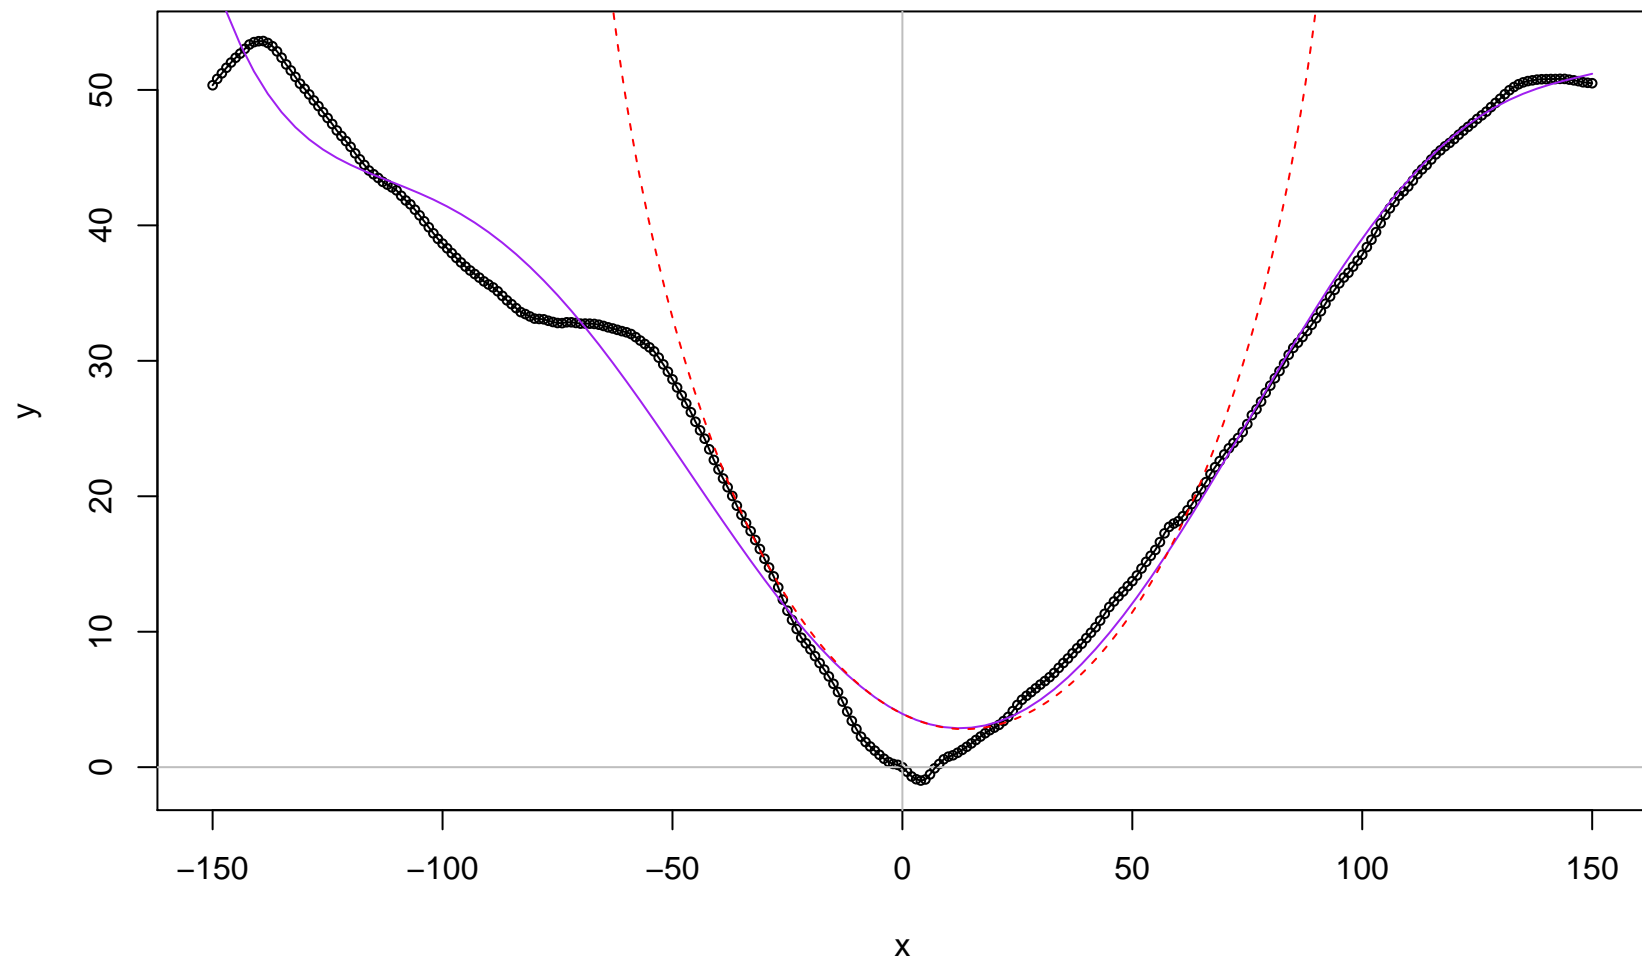

Site 202

$K \cdot 100 = 0.1221$

$R^2 = 0.9864$

radius= 819.2344

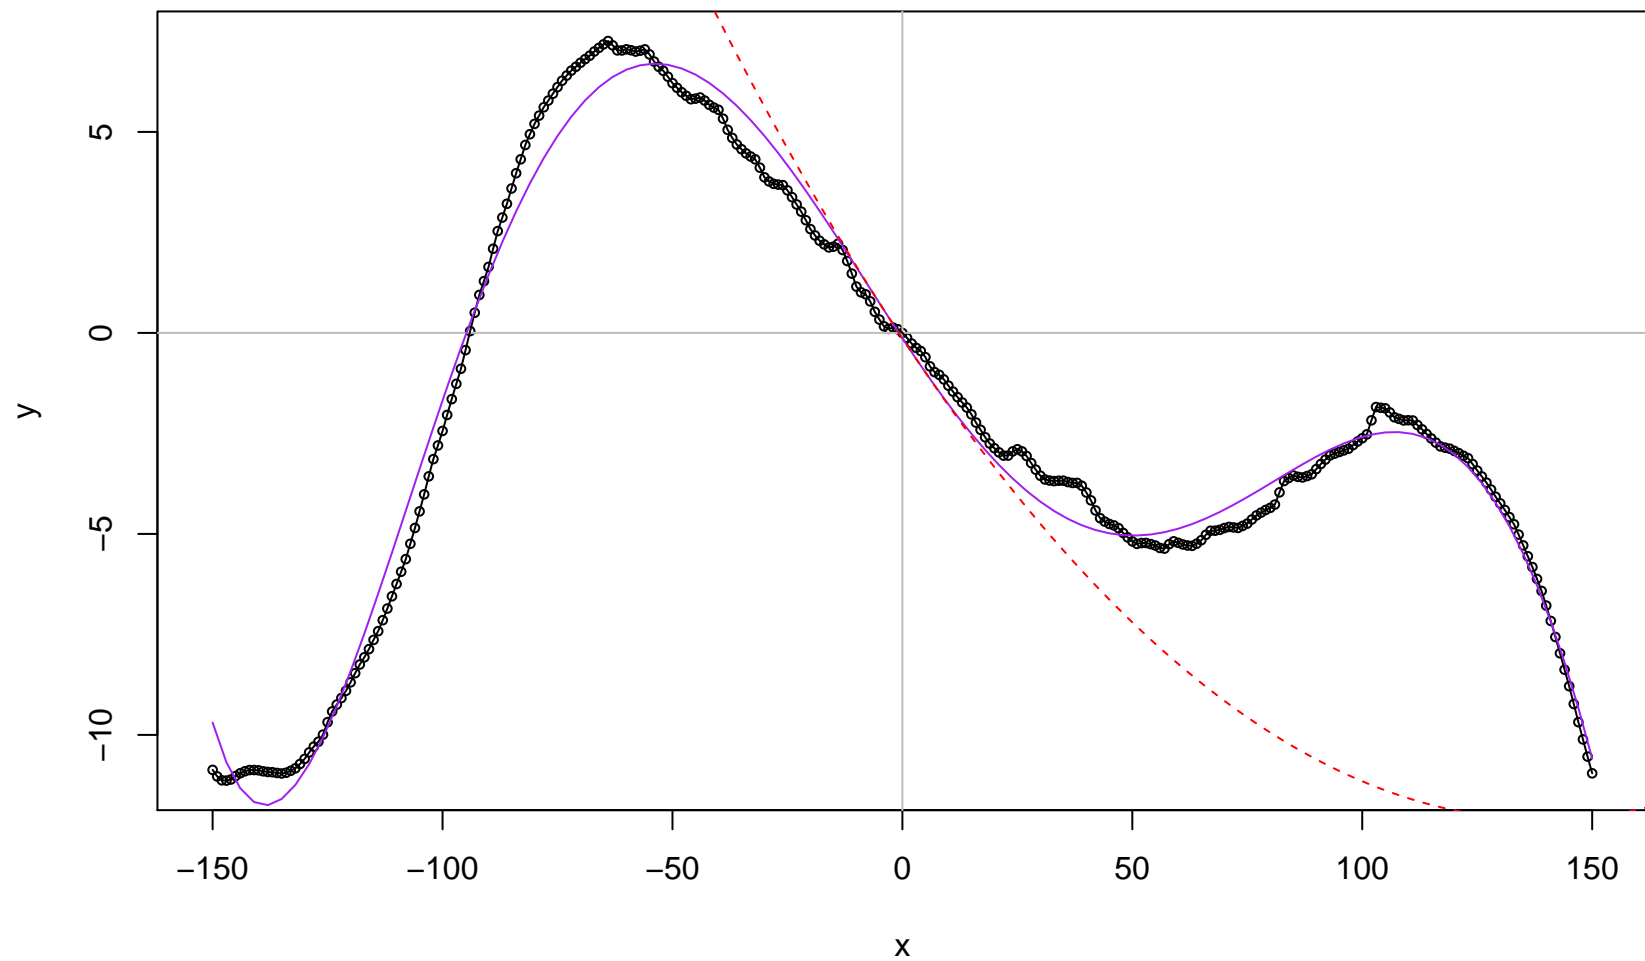

Site 203

$K*100 = -0.7335$

$R^2 = 0.9956$

radius =  $-136.3323$

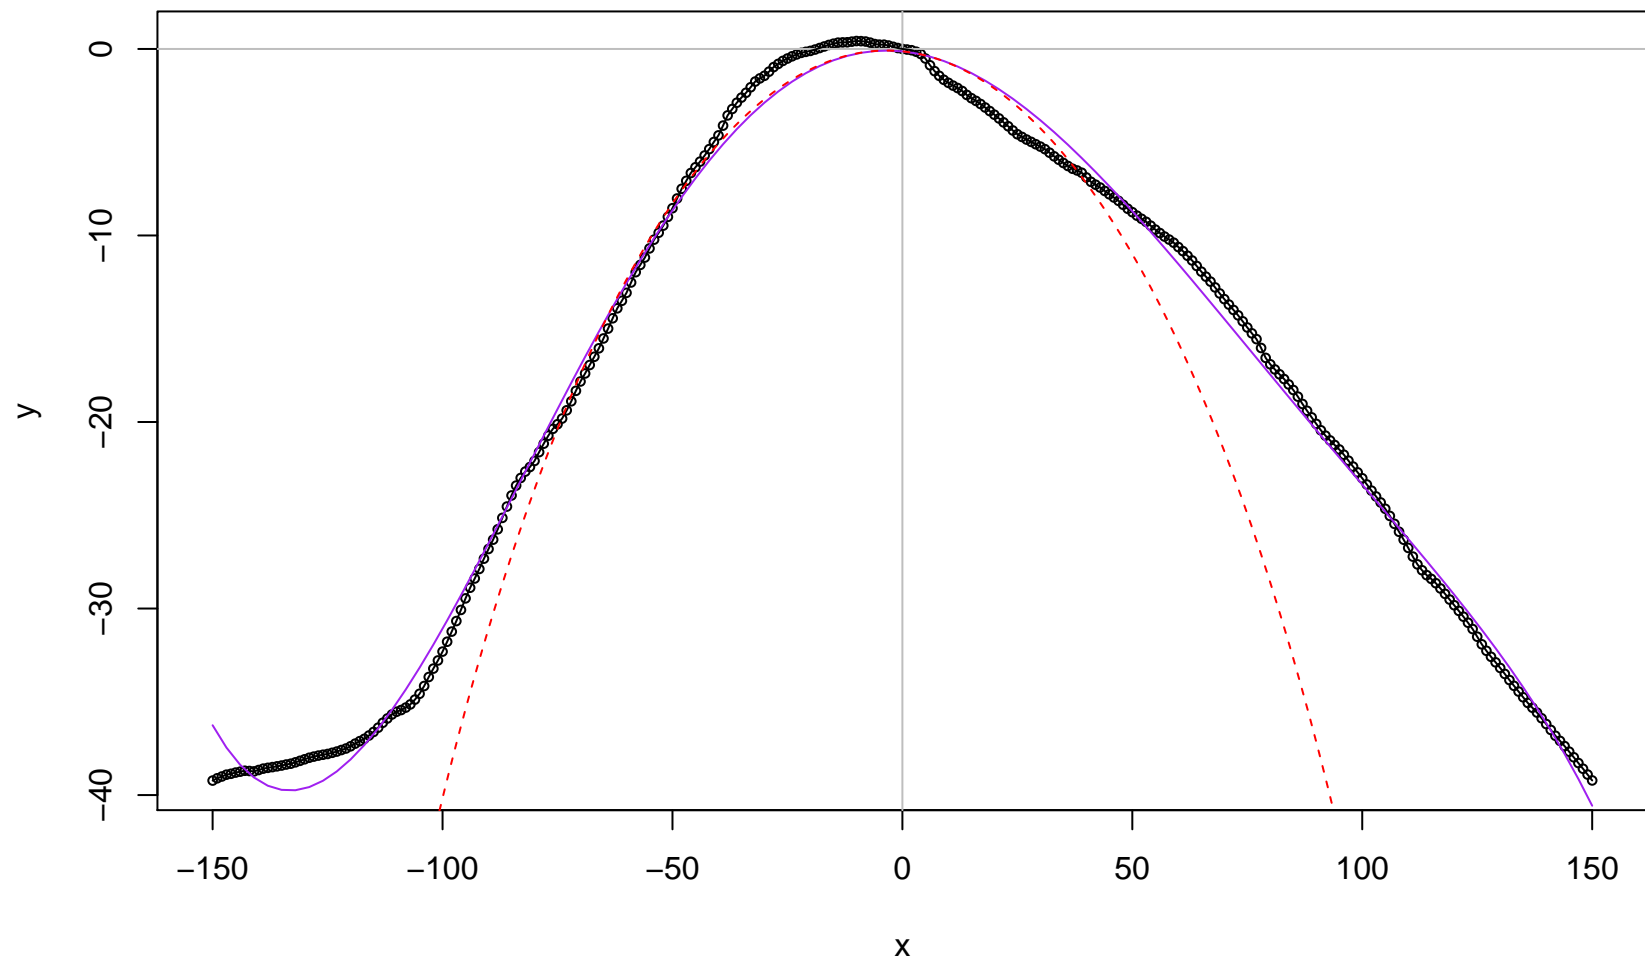

Site 204

$K*100 = -0.5088$

$R^2 = 0.9814$

radius =  $-196.5323$

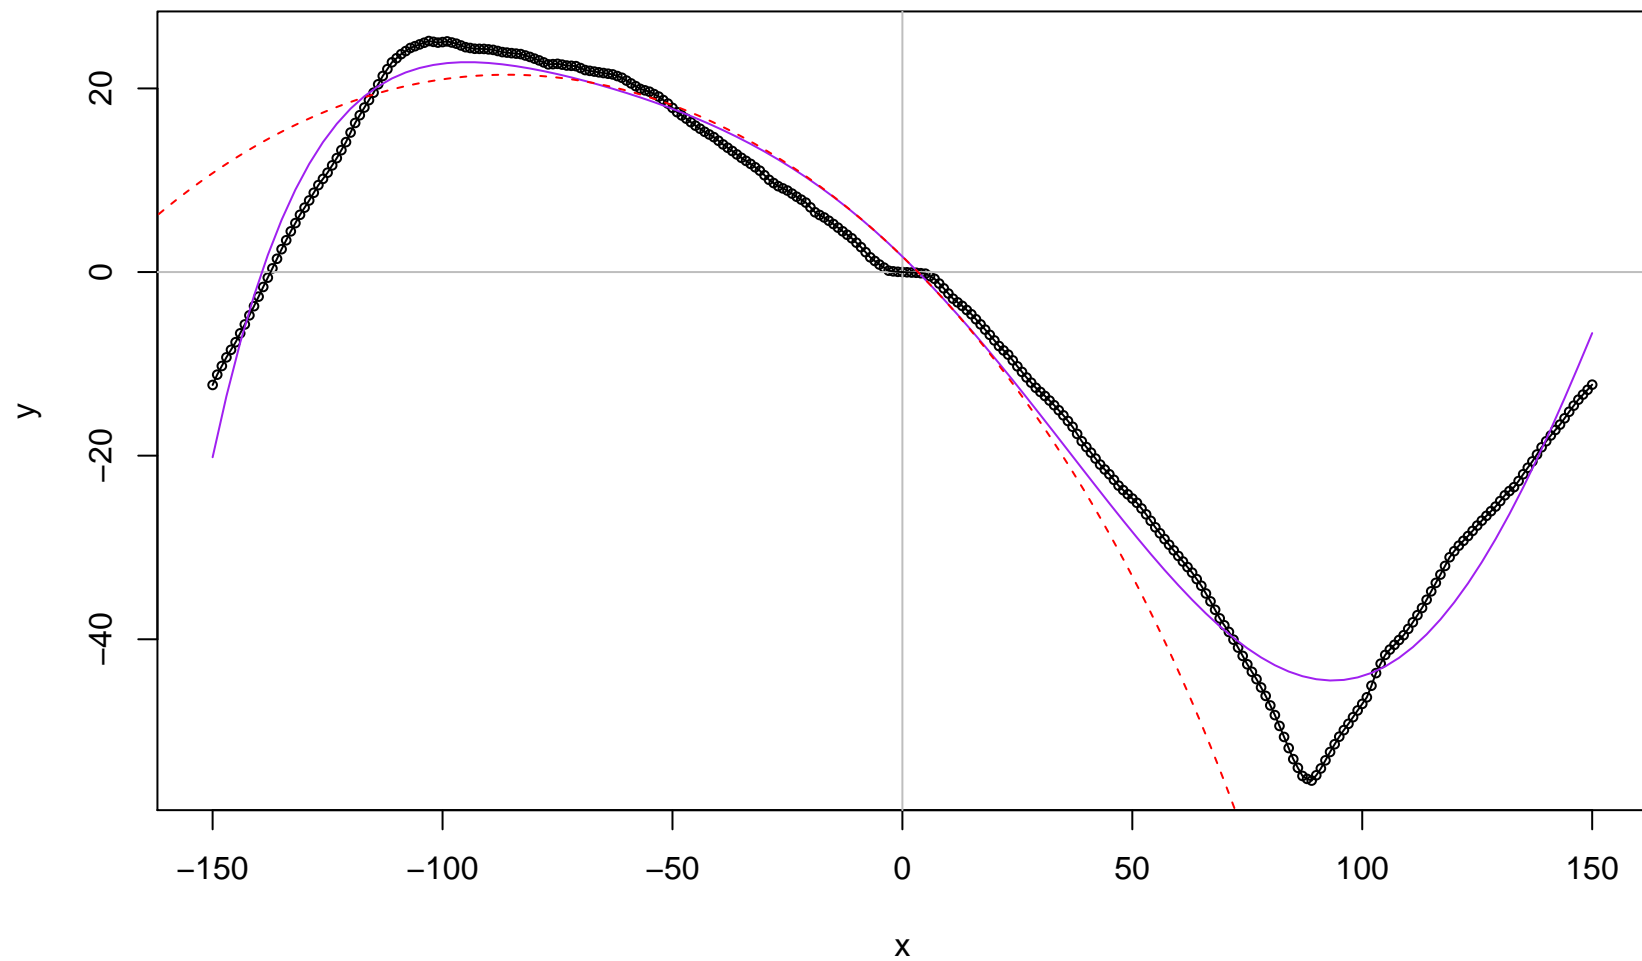

Site 205

$K*100 = -0.9893$

$R^2 = 0.9128$

radius =  $-101.0772$

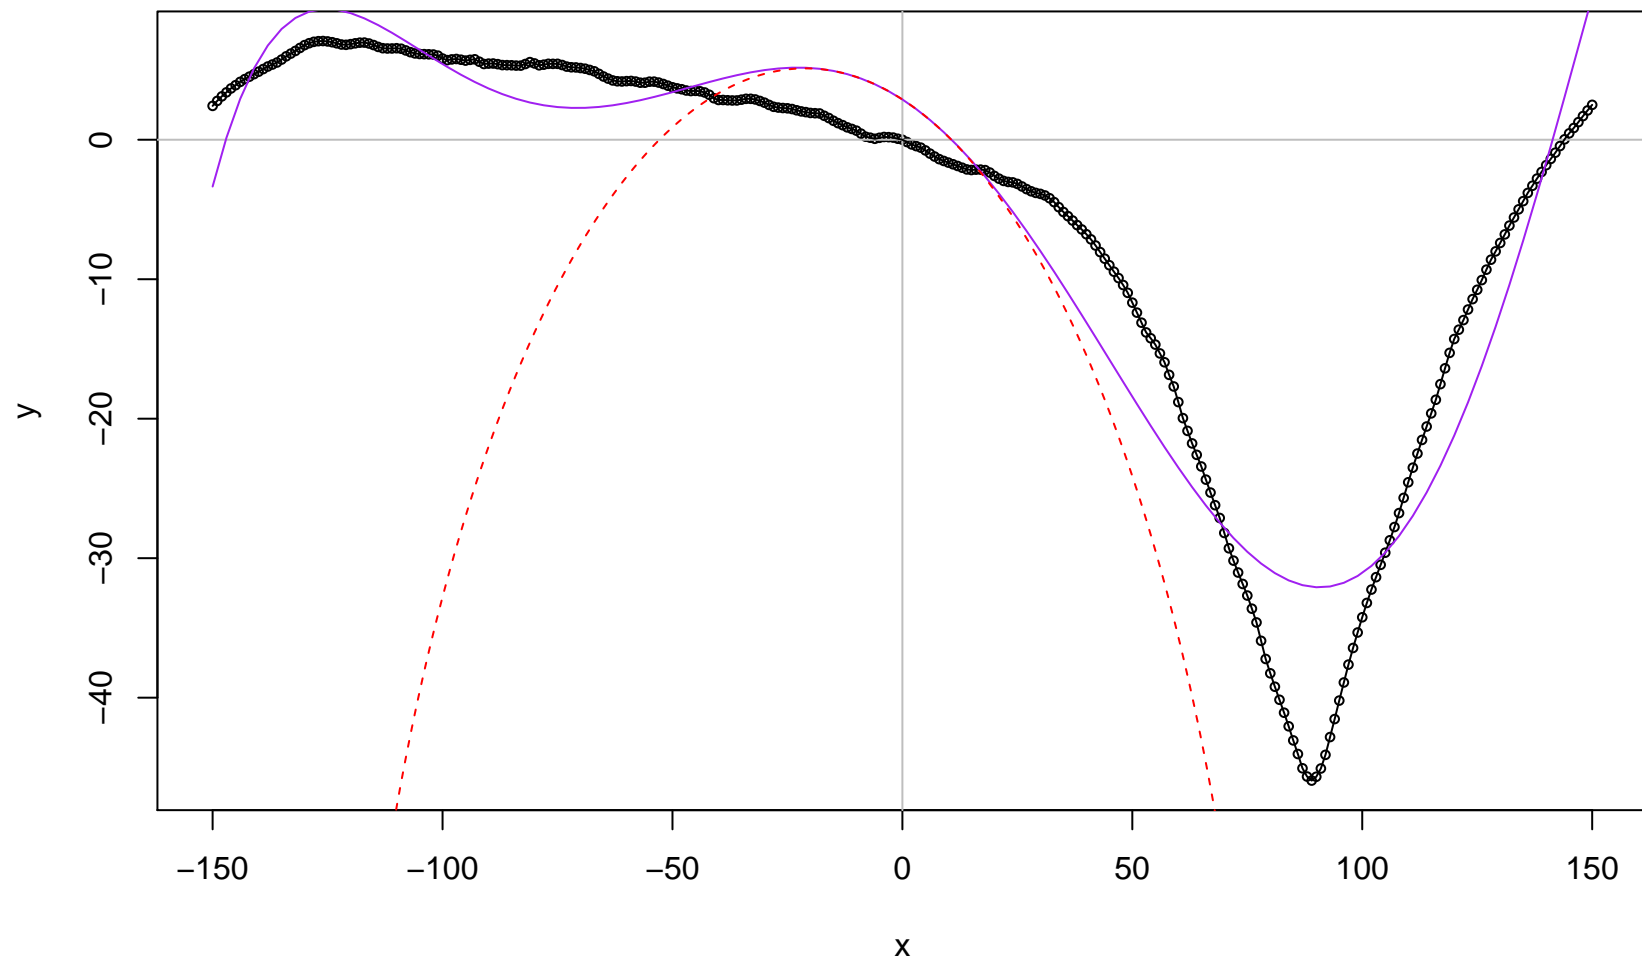

Site 206

$K*100 = -0.2686$

$R^2 = 0.9076$

radius =  $-372.3338$

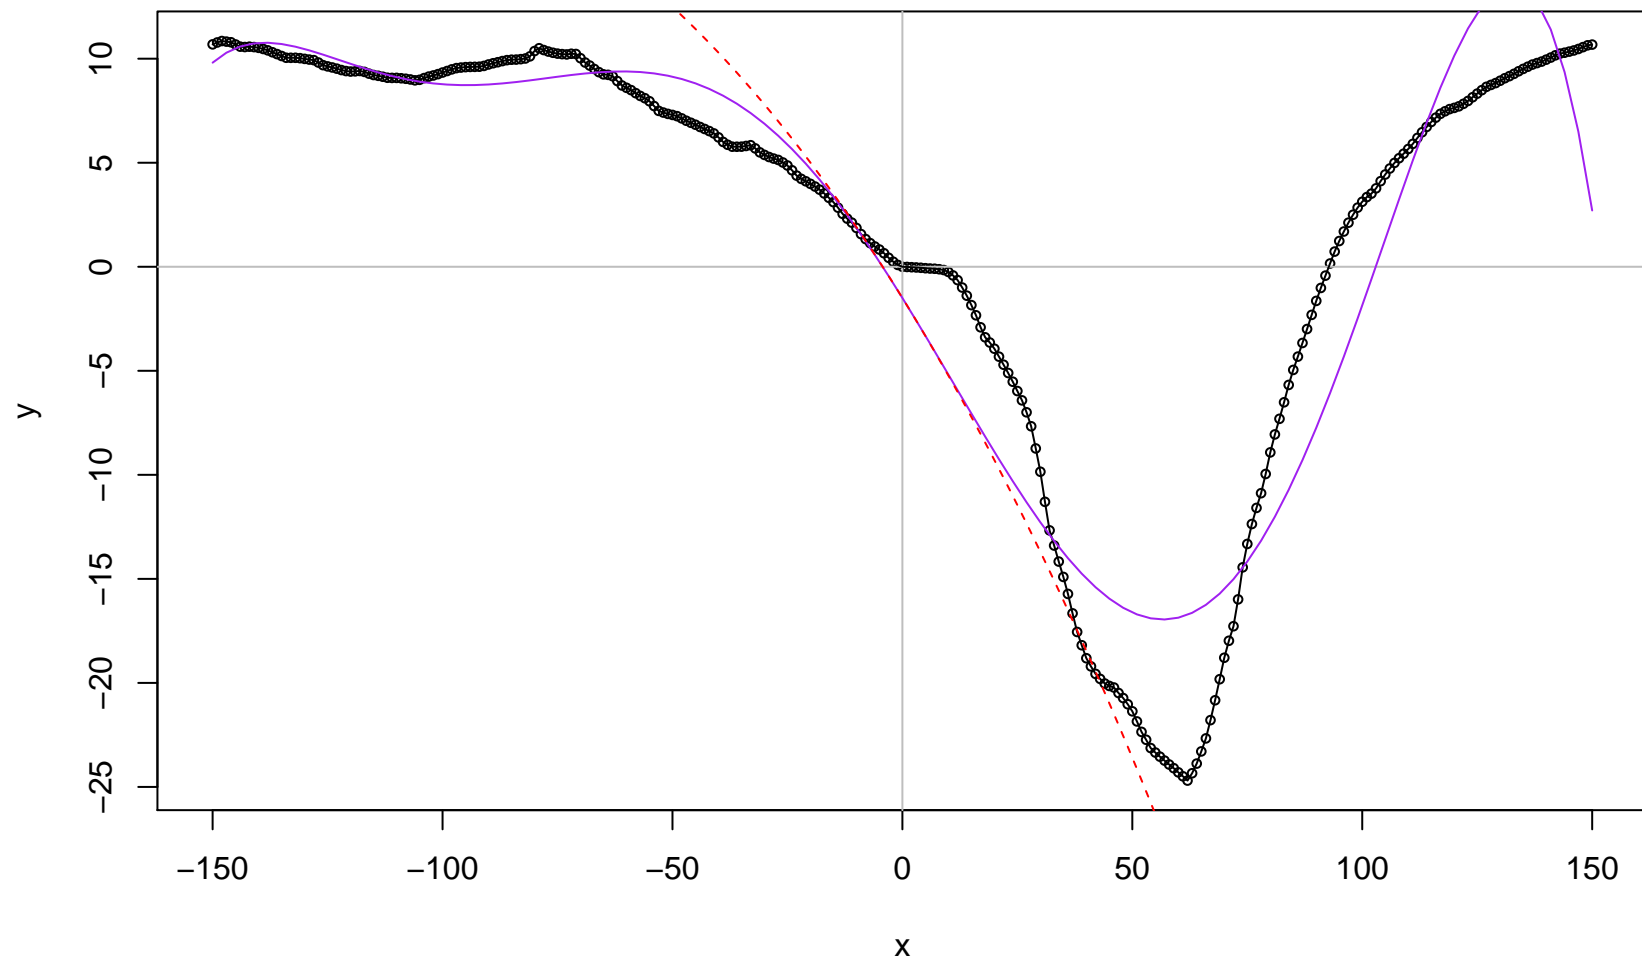

Site 207

$K*100= 0.476$

$R^2= 0.8924$

radius= 210.0708

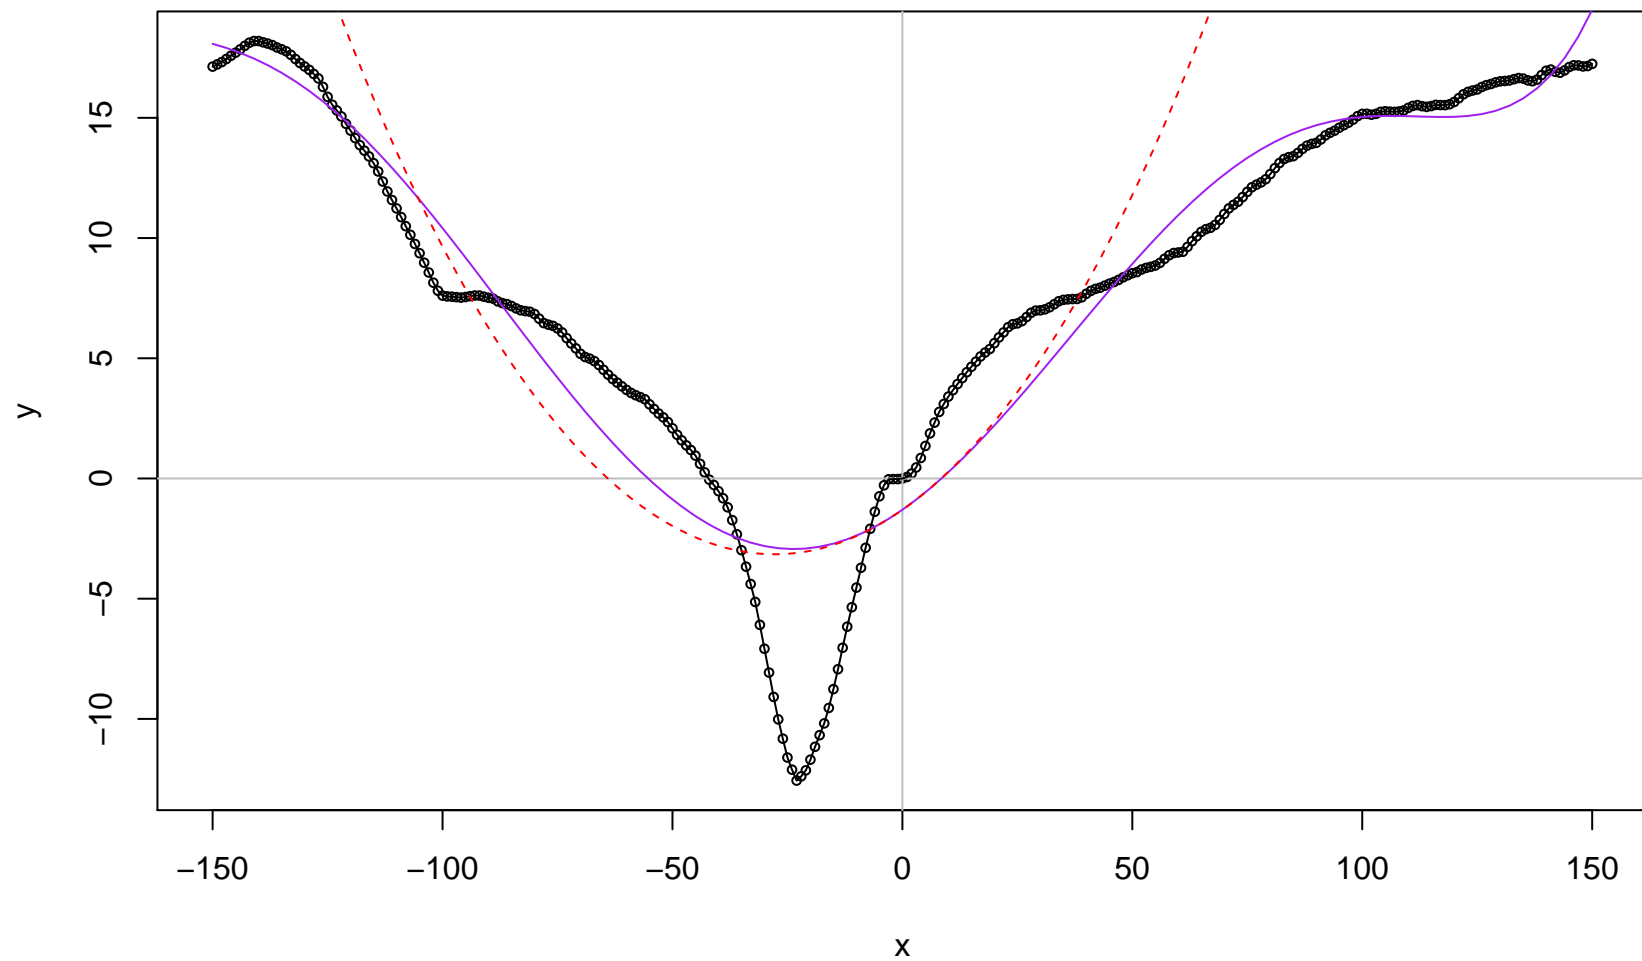

Site 208

$K*100 = -0.2214$

$R^2 = 0.987$

radius = -451.7018

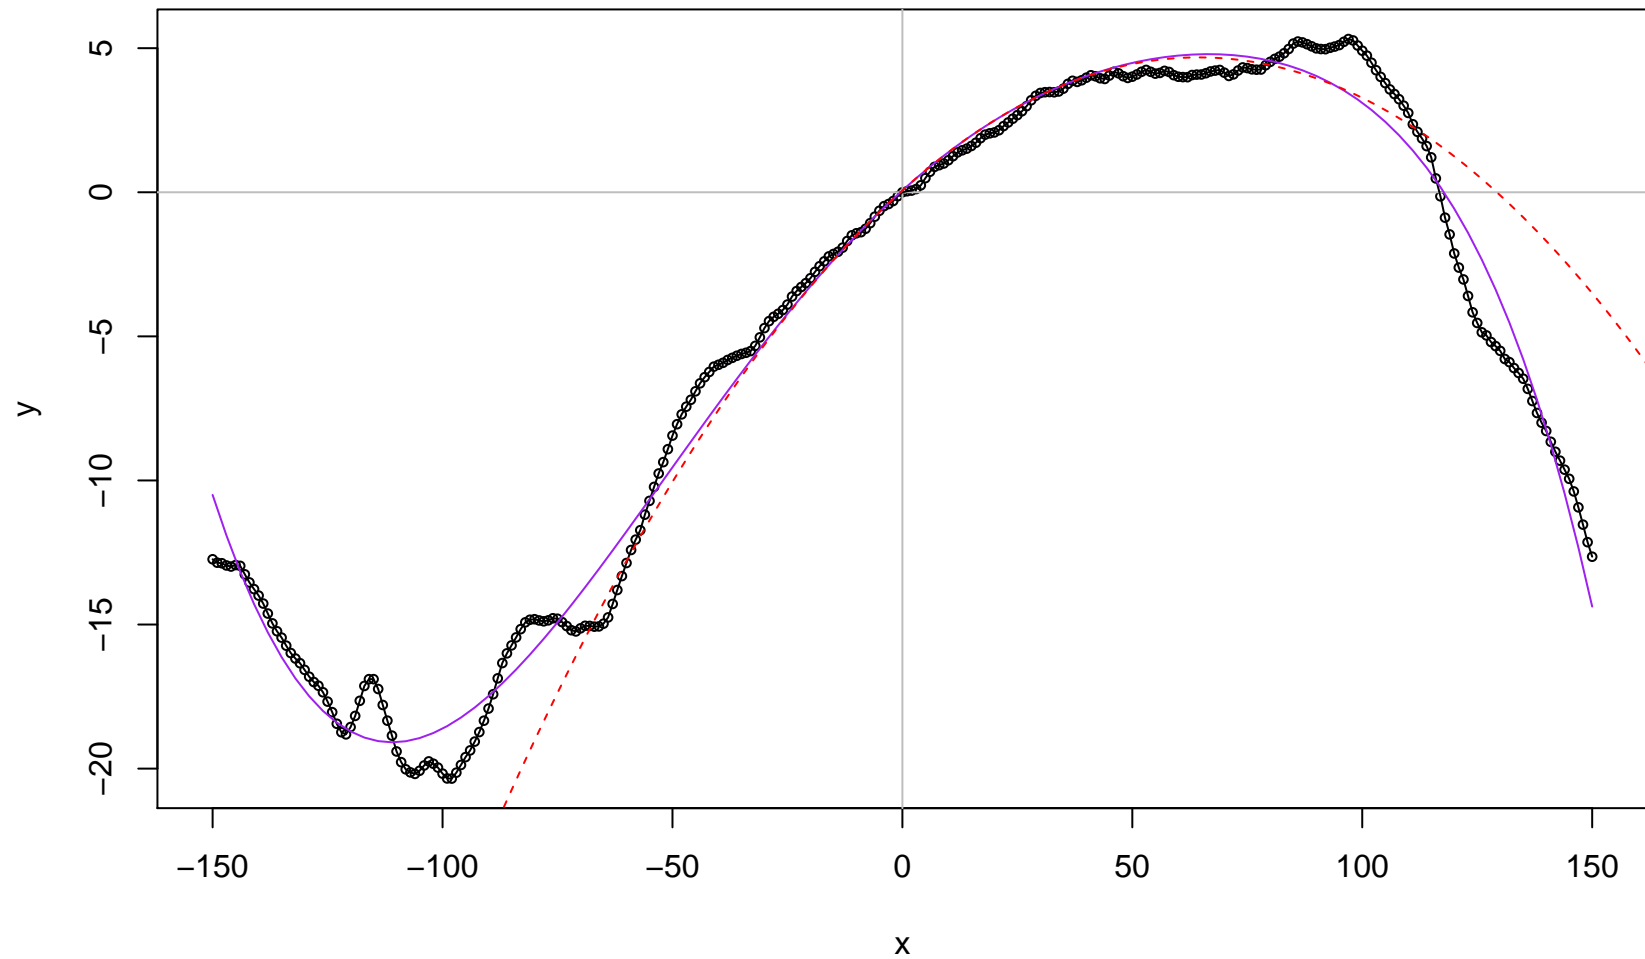



Site 209

$K*100= 0.1647$

$R^2= 0.9383$

radius= 607.2263

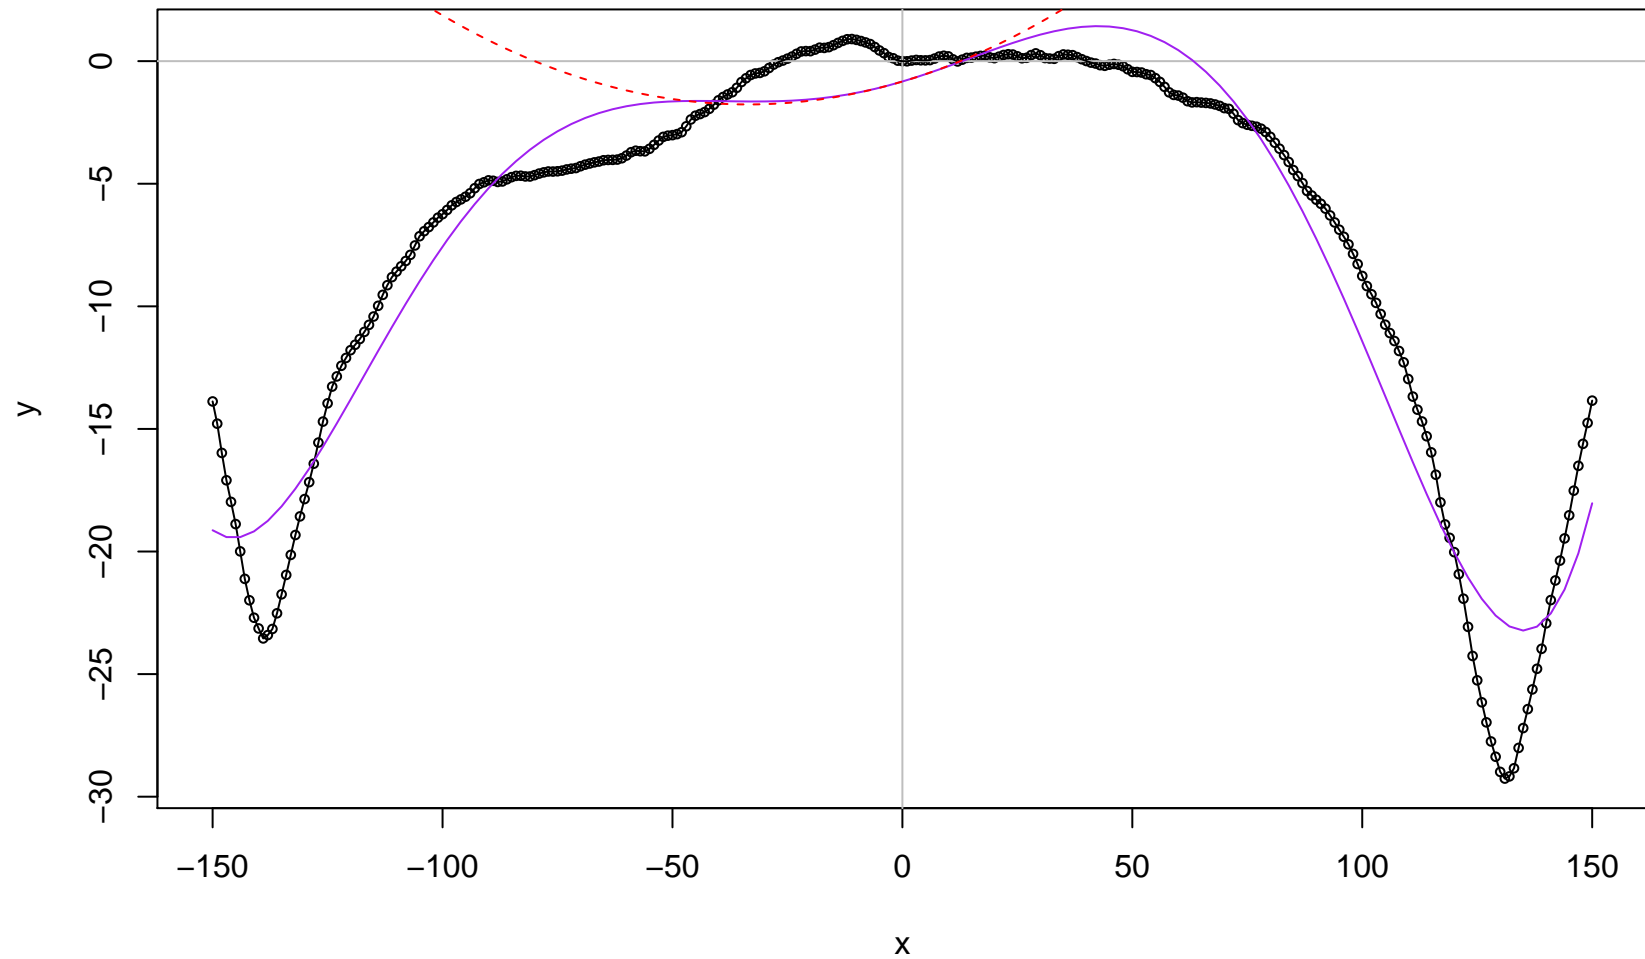

Site 210

$K \cdot 100 = -2.112$

$R^2 = 0.9231$

radius =  $-47.3475$

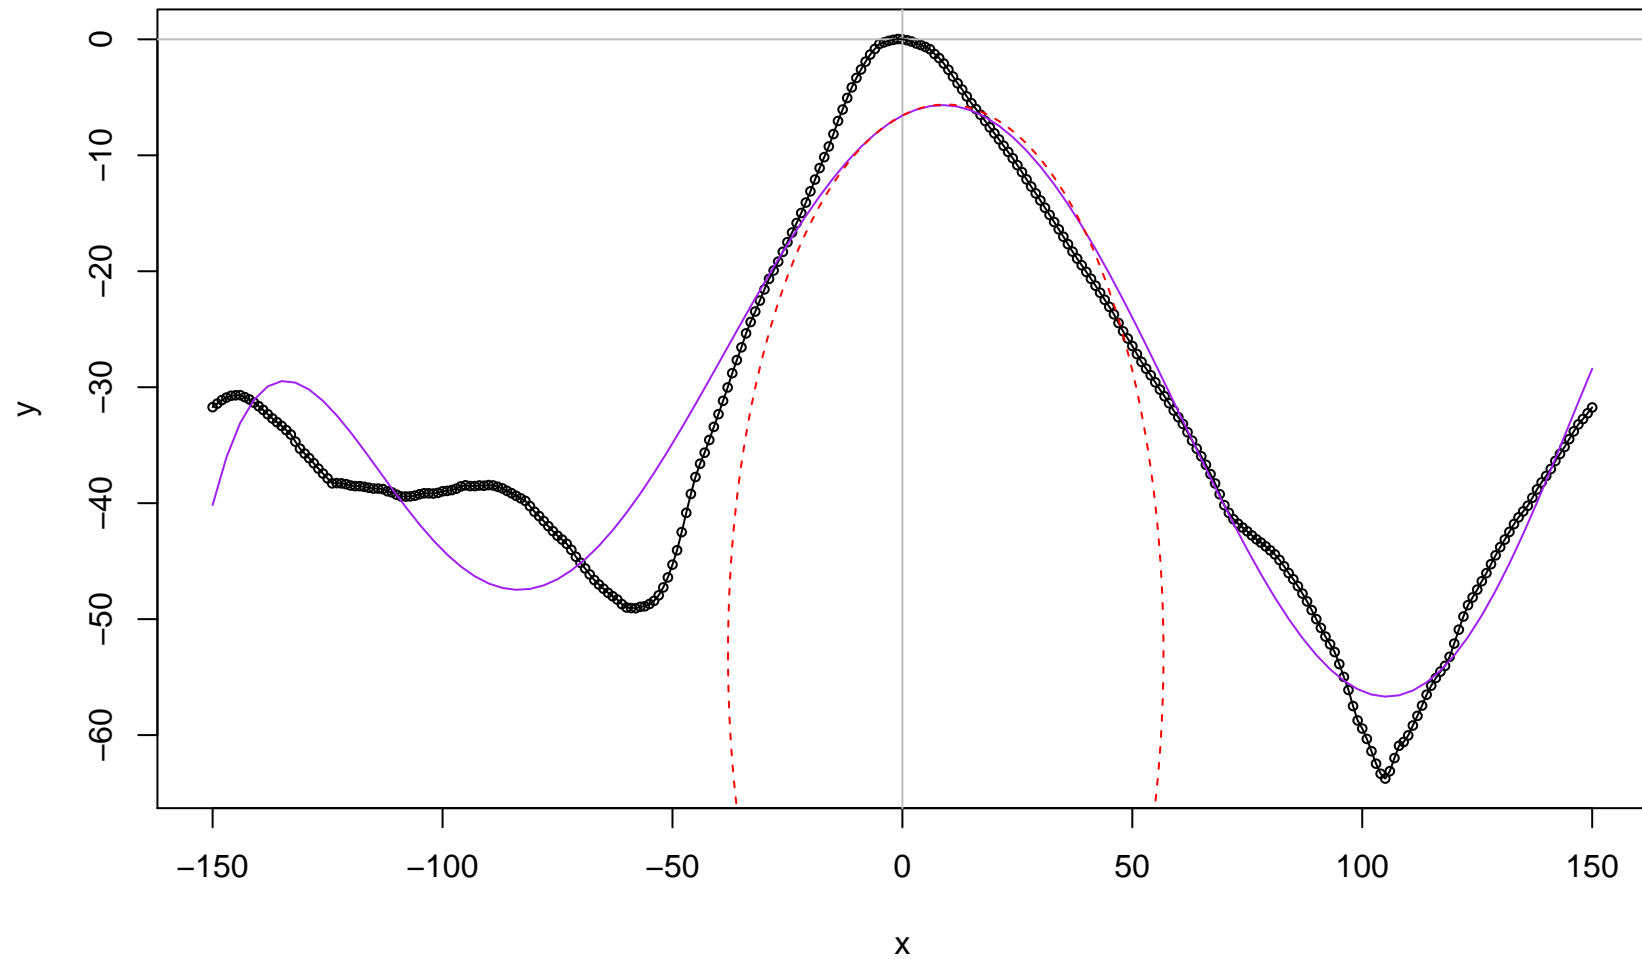

Site 211

$K*100= 0.7756$

$R^2= 0.9156$

radius= 128.9301

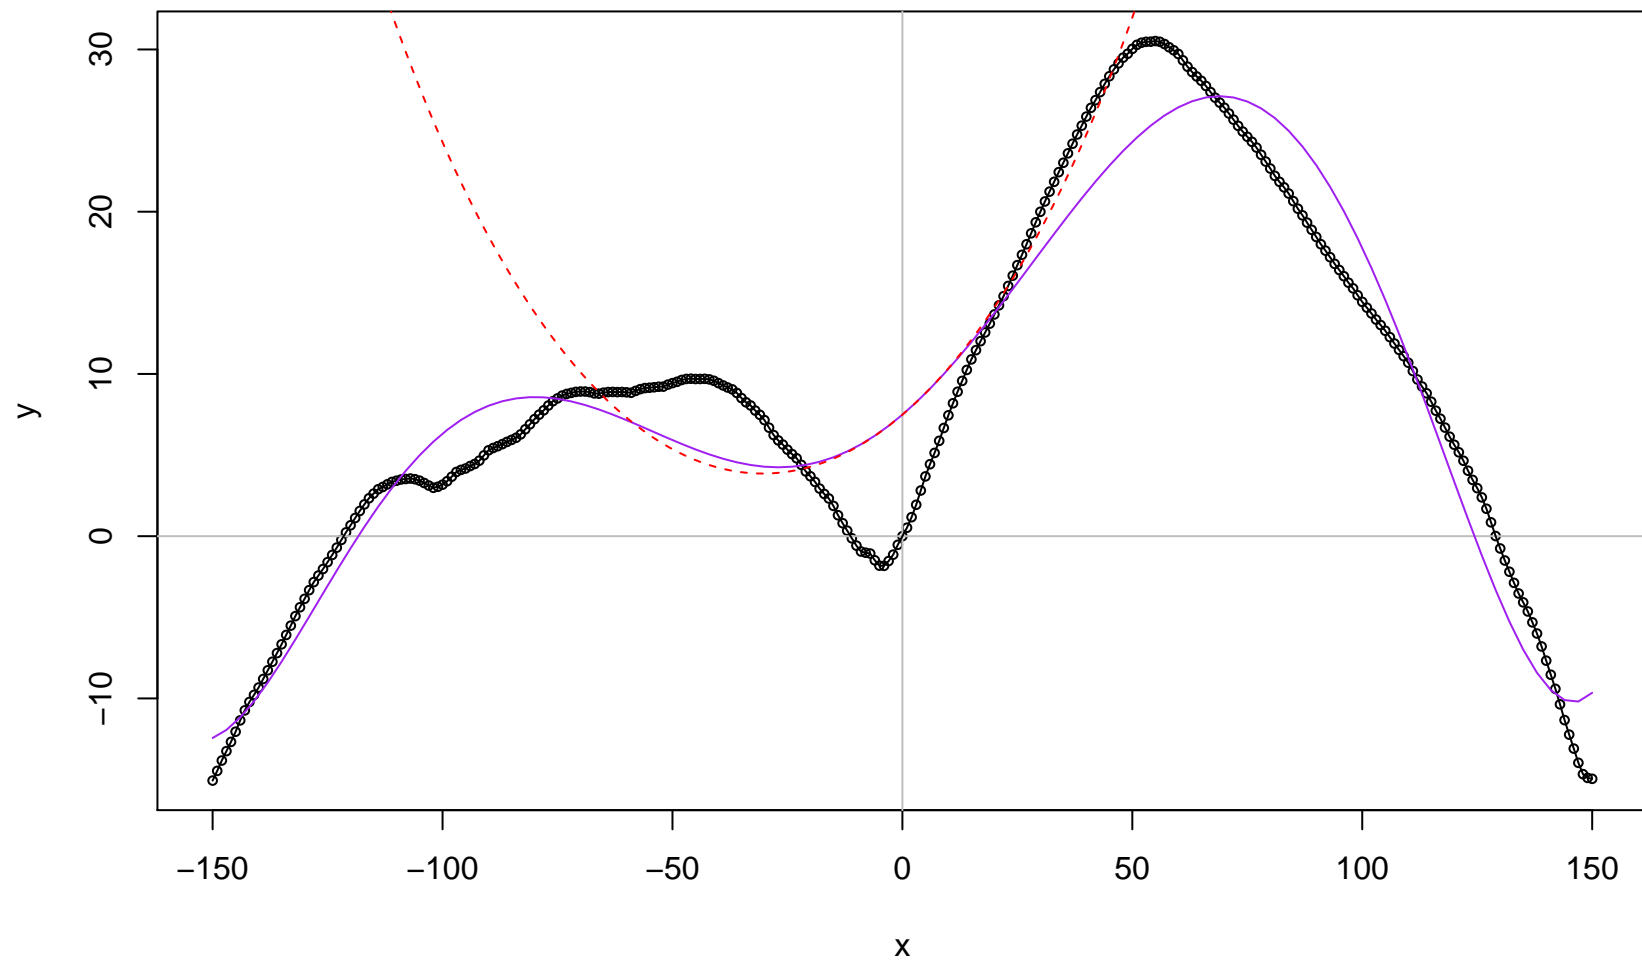

Site 212

$K*100= 1.0571$

$R^2= 0.8547$

radius= 94.6016

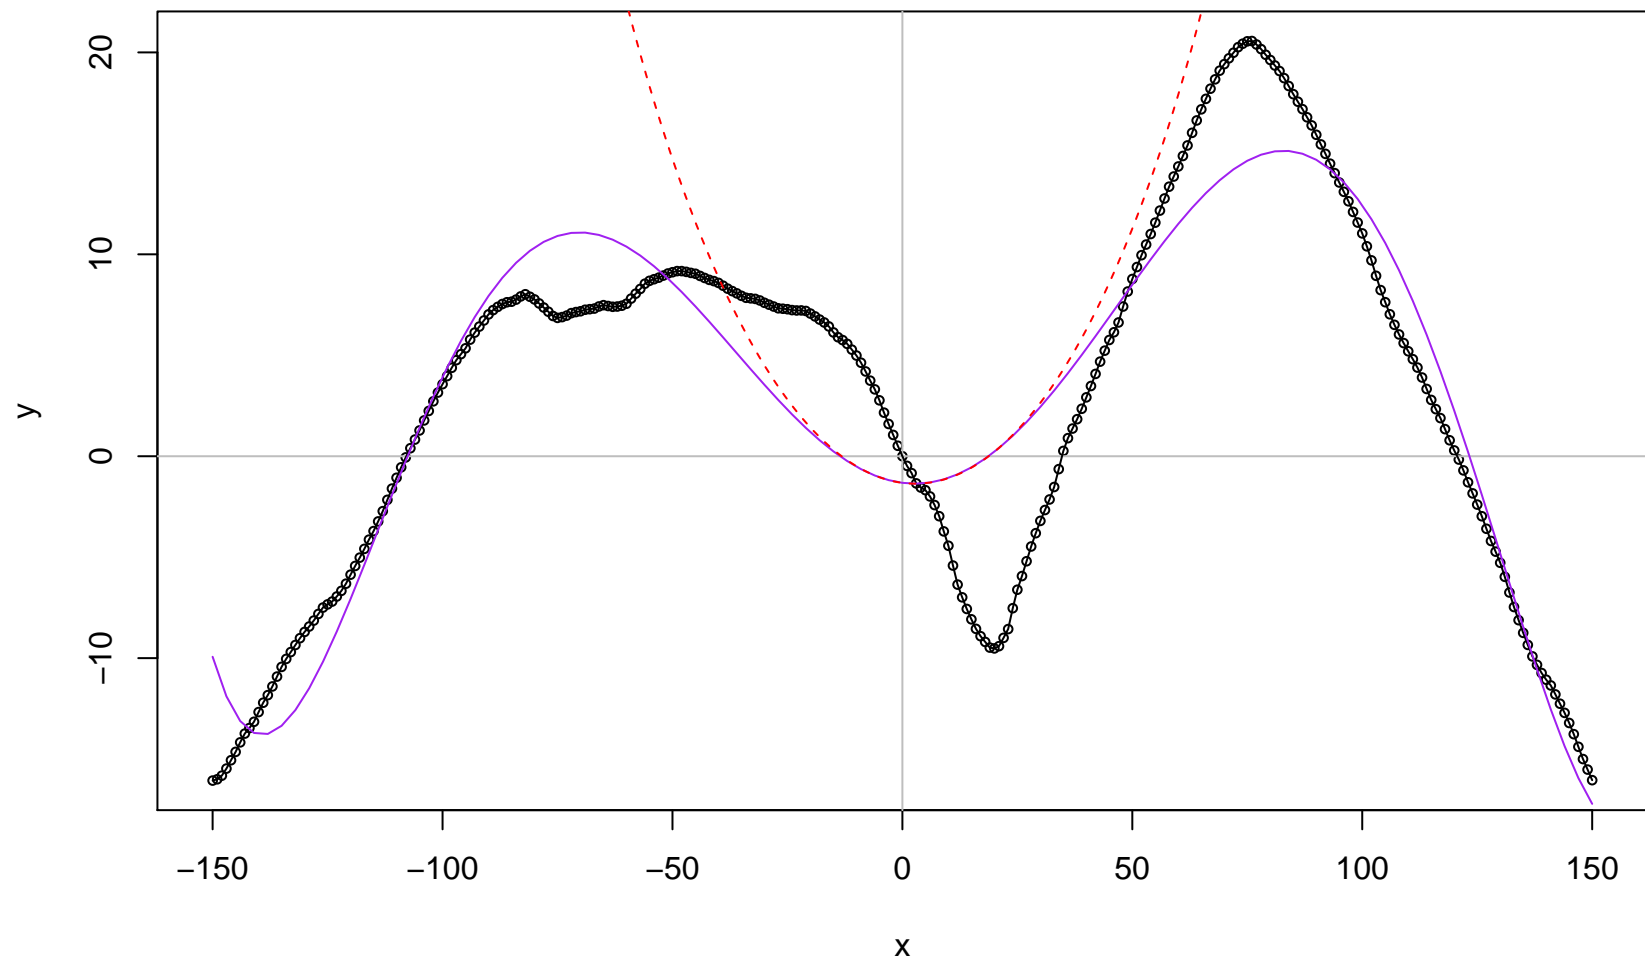

Site 213

$K \cdot 100 = 0.6602$

$R^2 = 0.8635$

radius= 151.4641

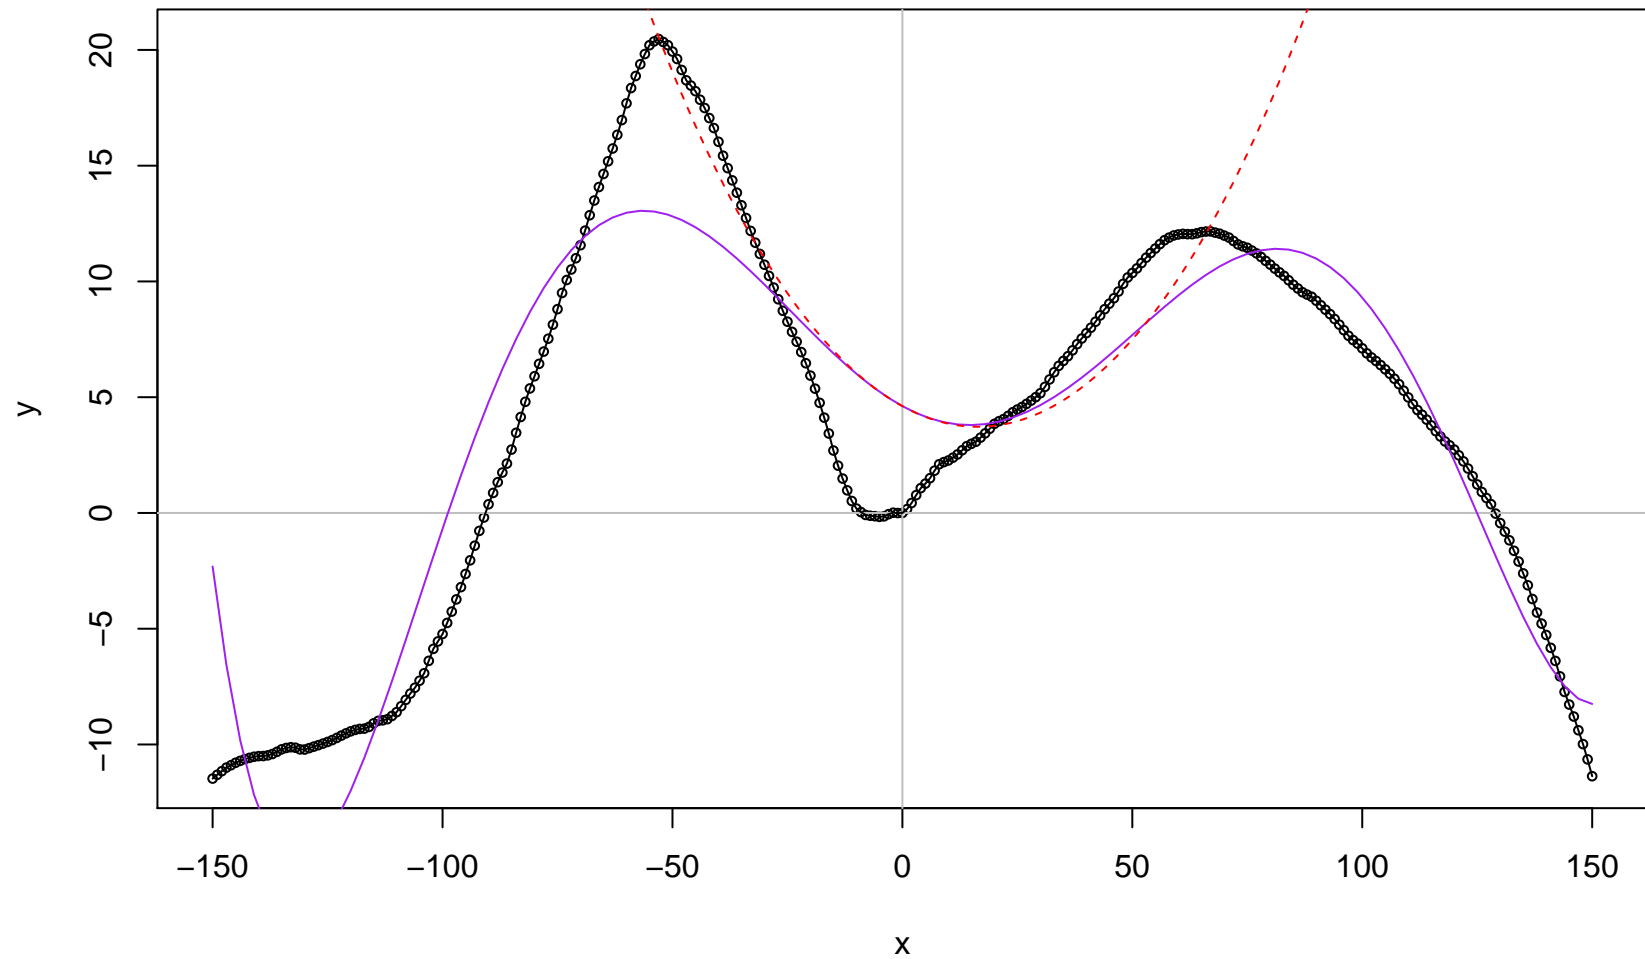

Site 214

$K*100 = -1.0676$

$R^2 = 0.9545$

radius =  $-93.6638$

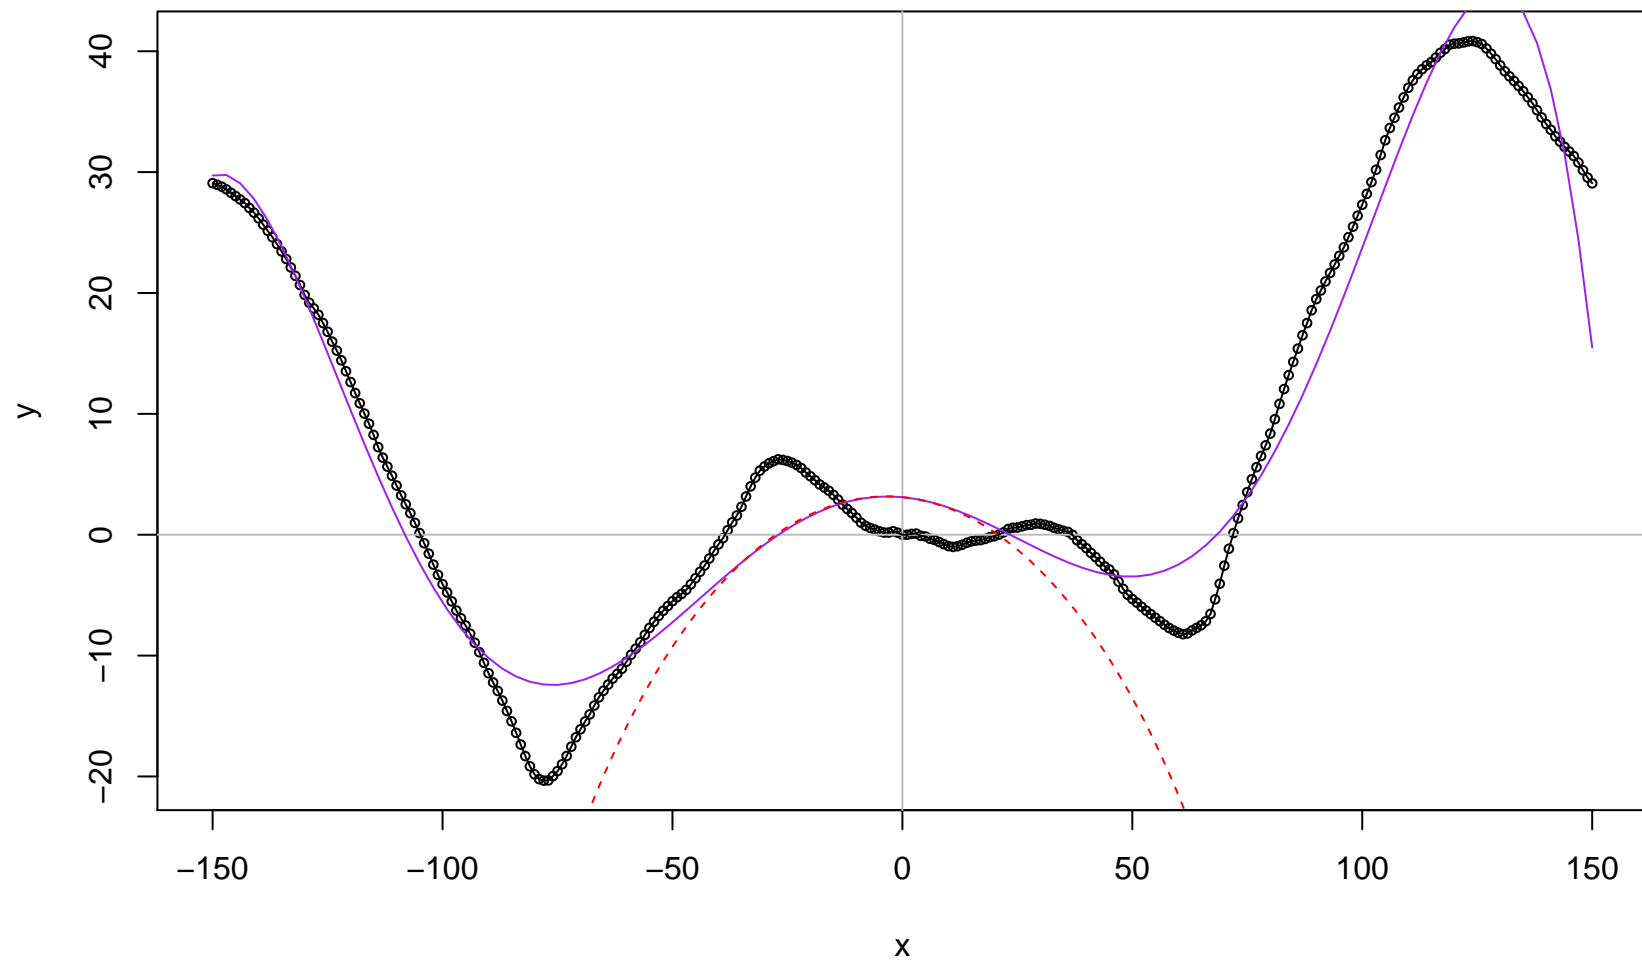

Site 215

$K*100= 1.5927$

$R^2= 0.969$

radius= 62.786

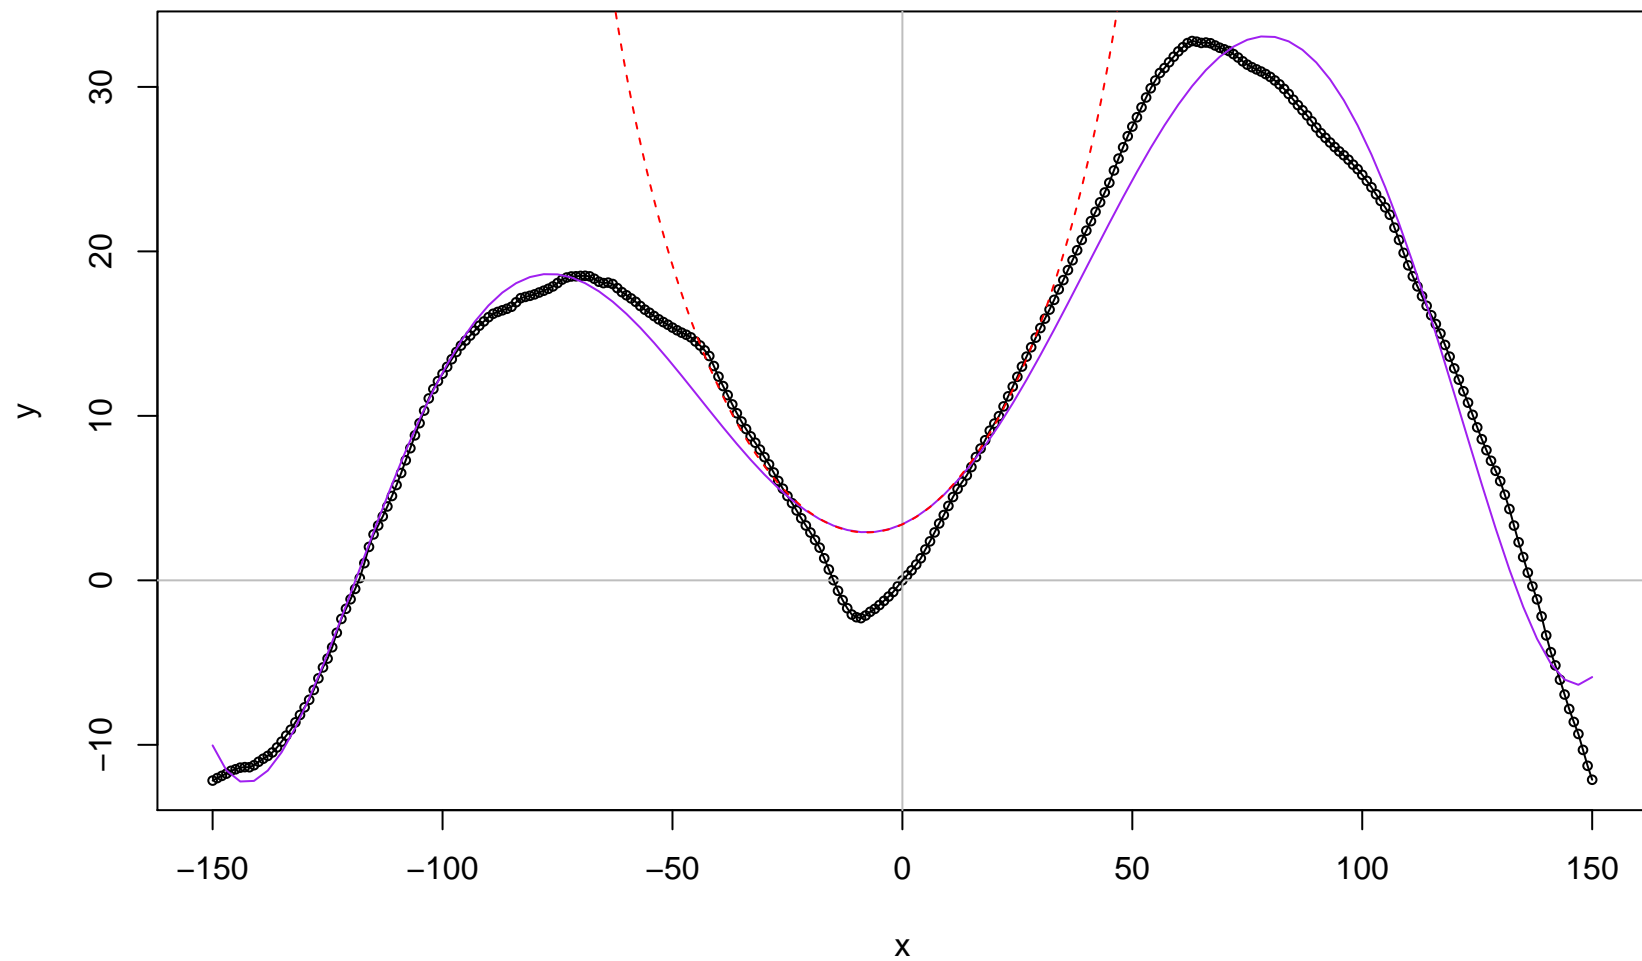

Site 216

$K*100= 0.4006$

$R^2= 0.8542$

radius= 249.5979

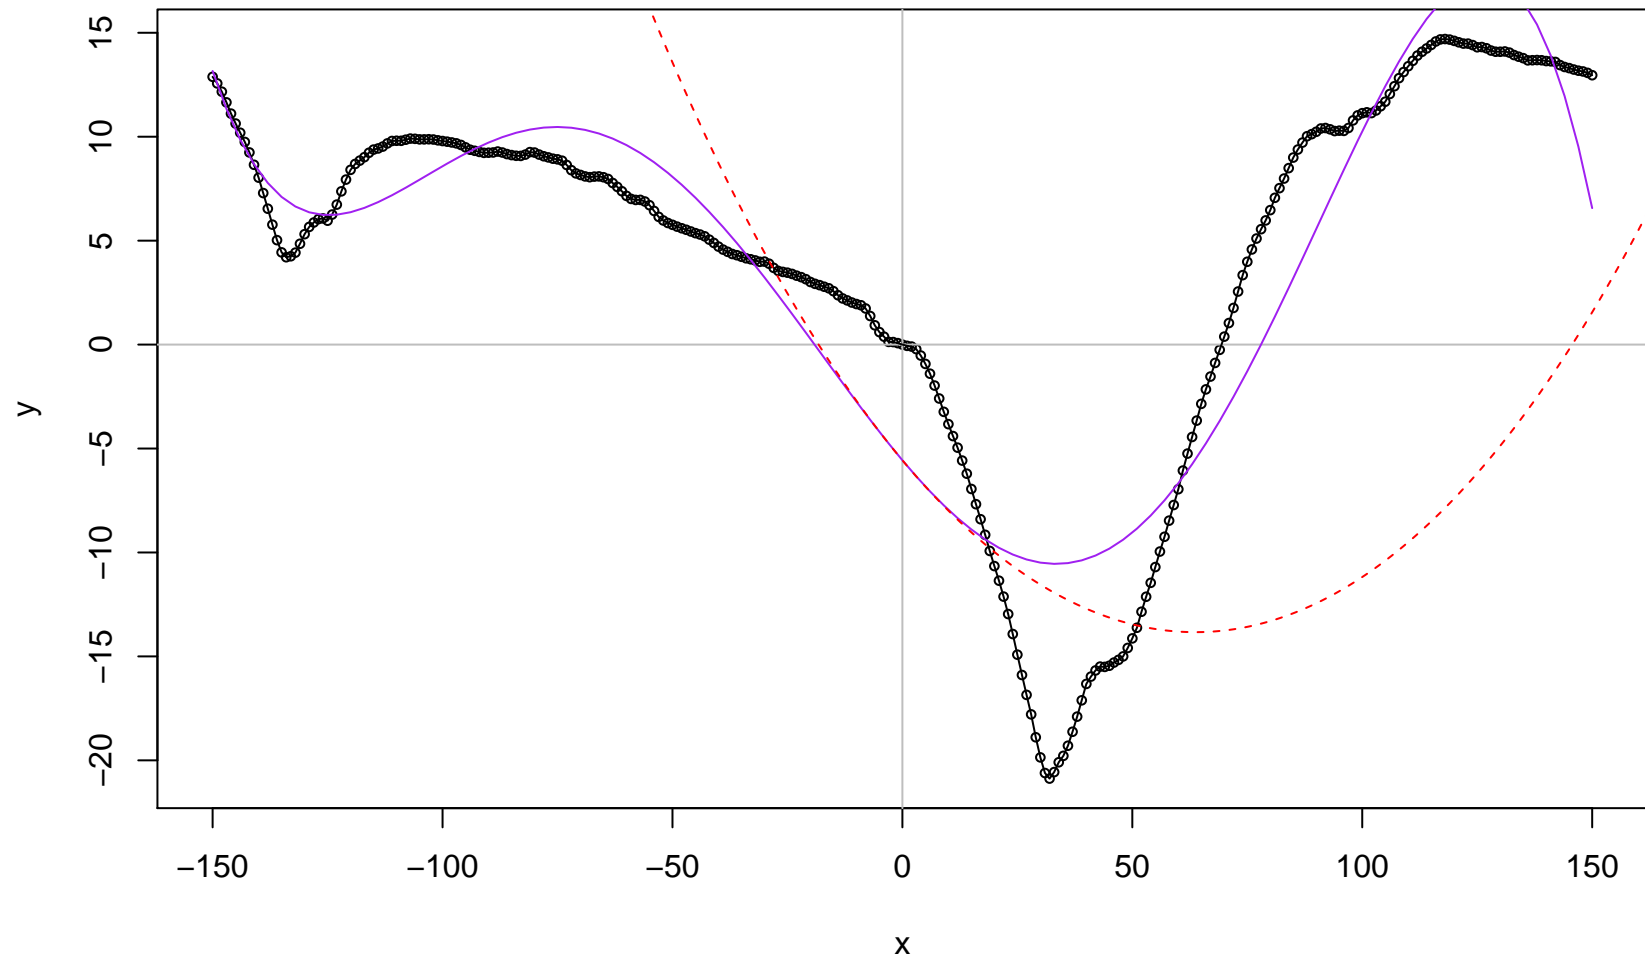



Site 217

$K*100 = -1.0256$

$R^2 = 0.9276$

radius =  $-97.5054$

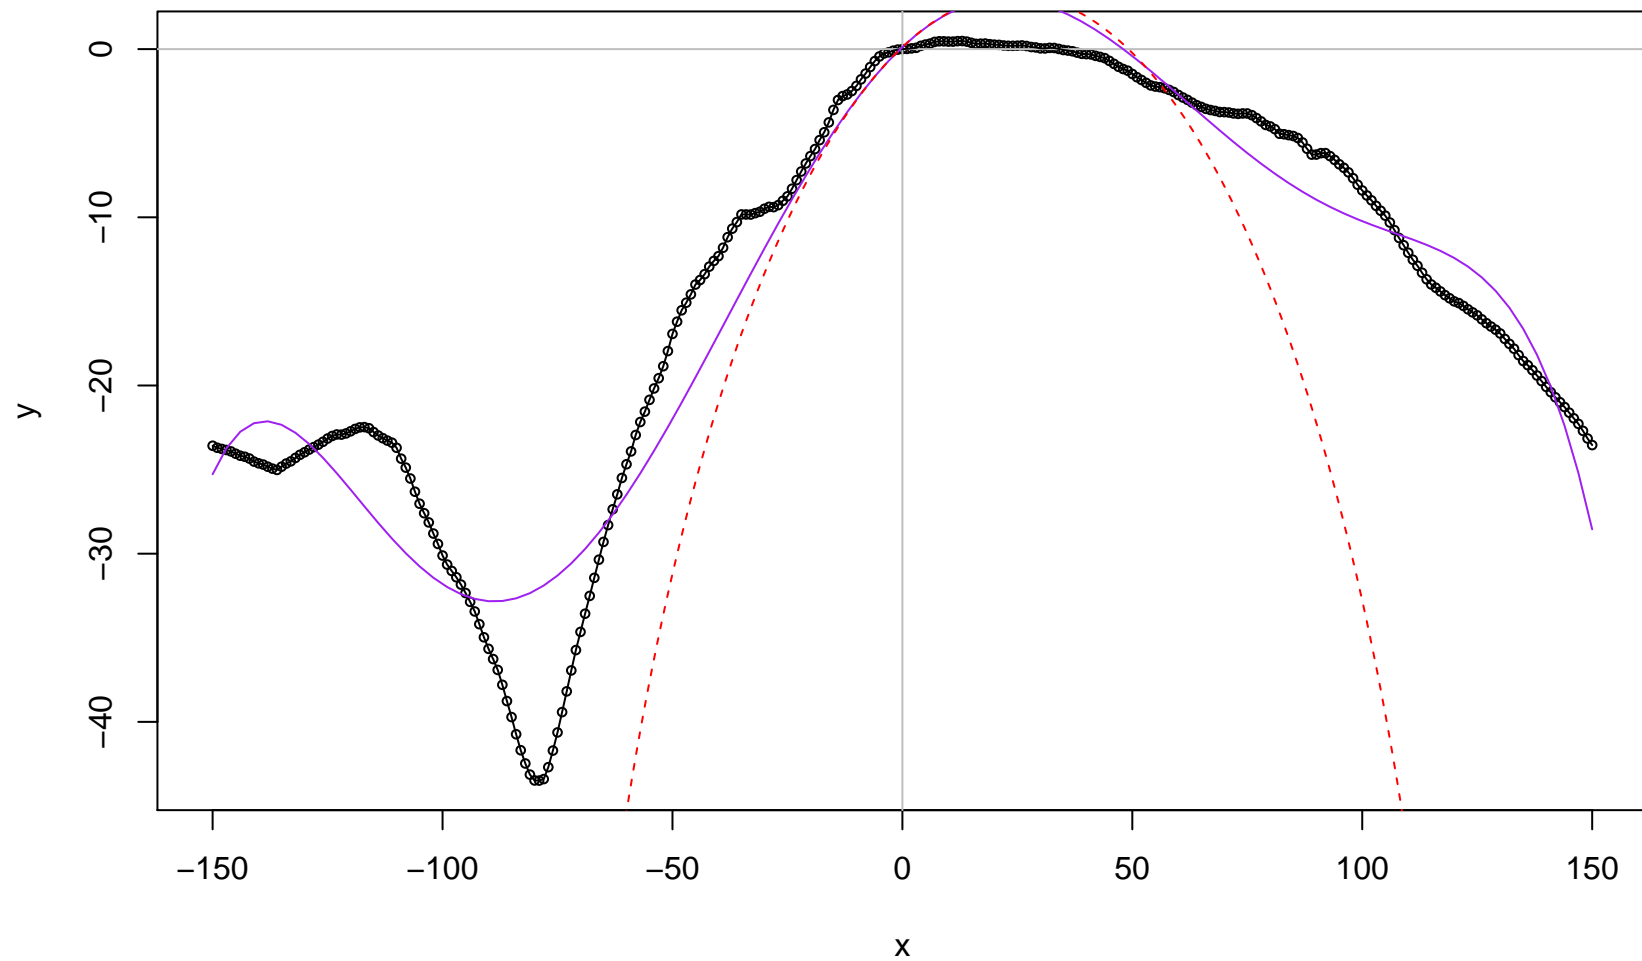

Site 218

$K*100= 1.3228$

$R^2= 0.9786$

radius= 75.595

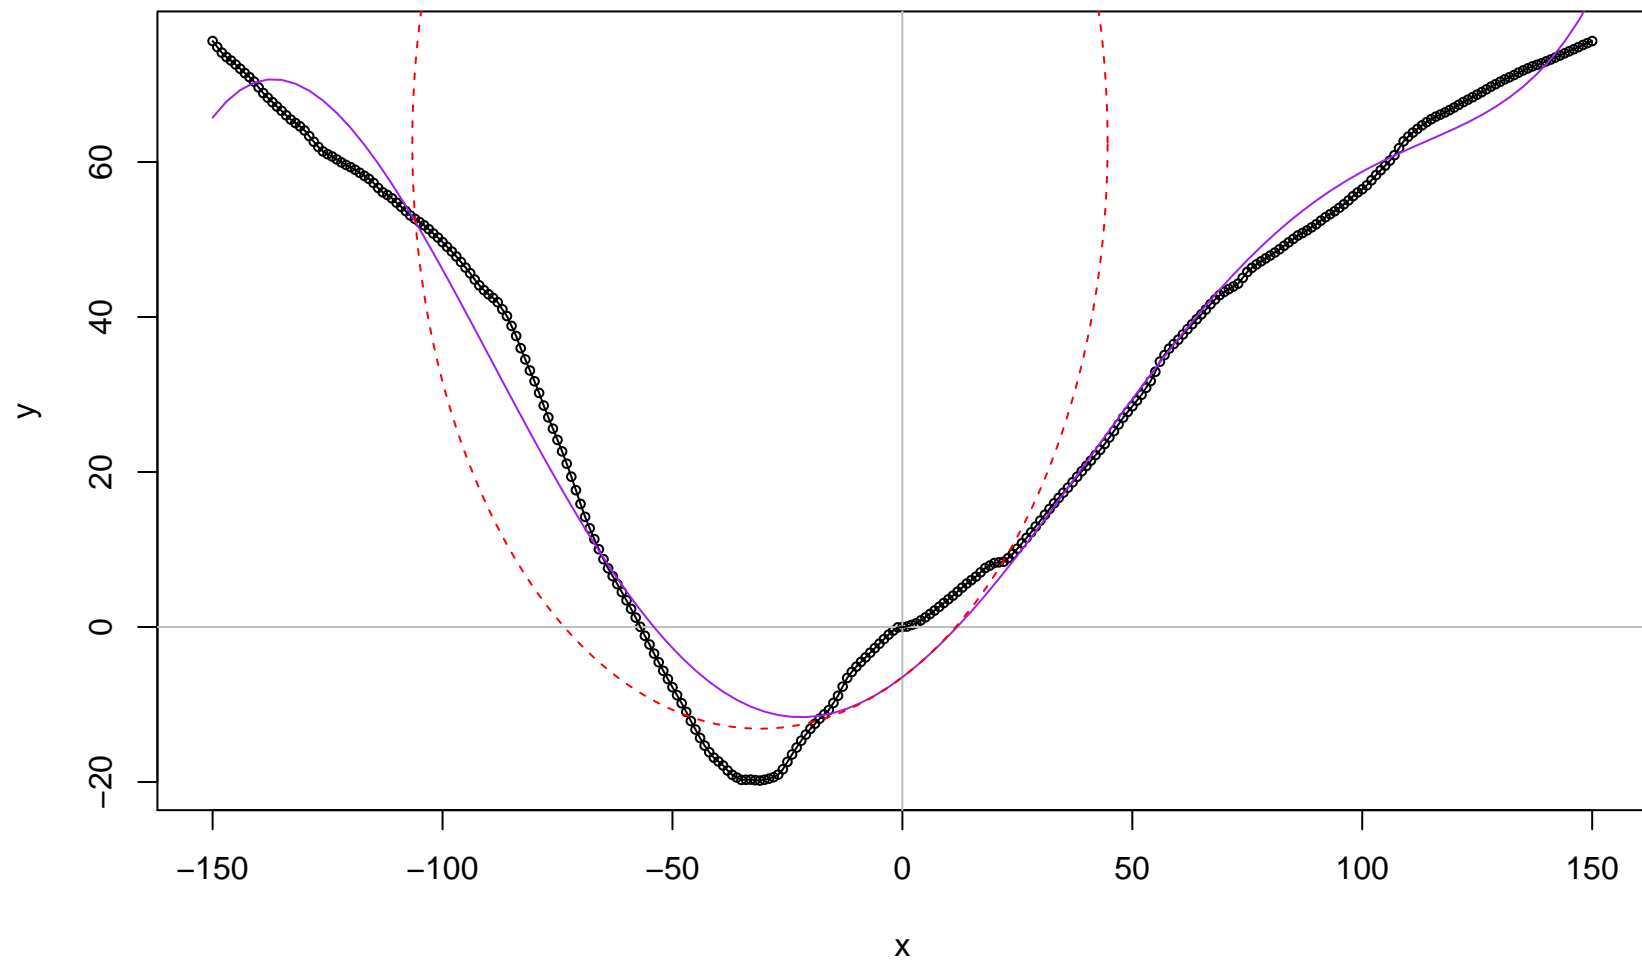

Site 219

$K*100= 0.7834$

$R^2= 0.9794$

radius= 127.651

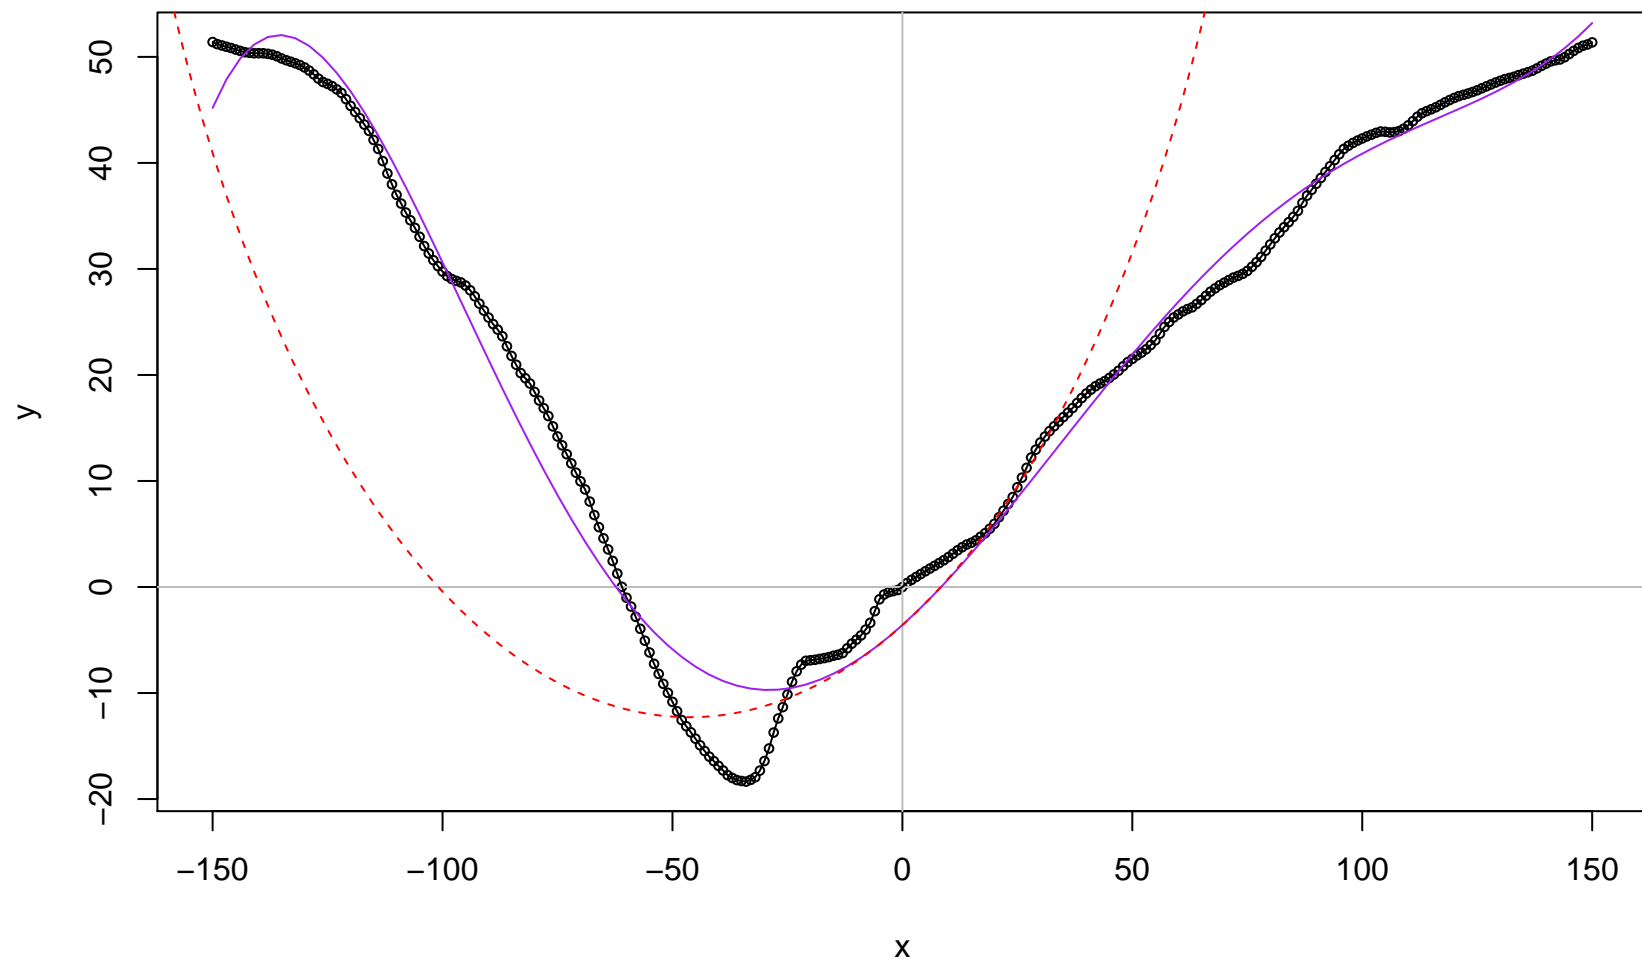

Site 220

$K \cdot 100 = 0.7363$

$R^2 = 0.8019$

radius= 135.8134

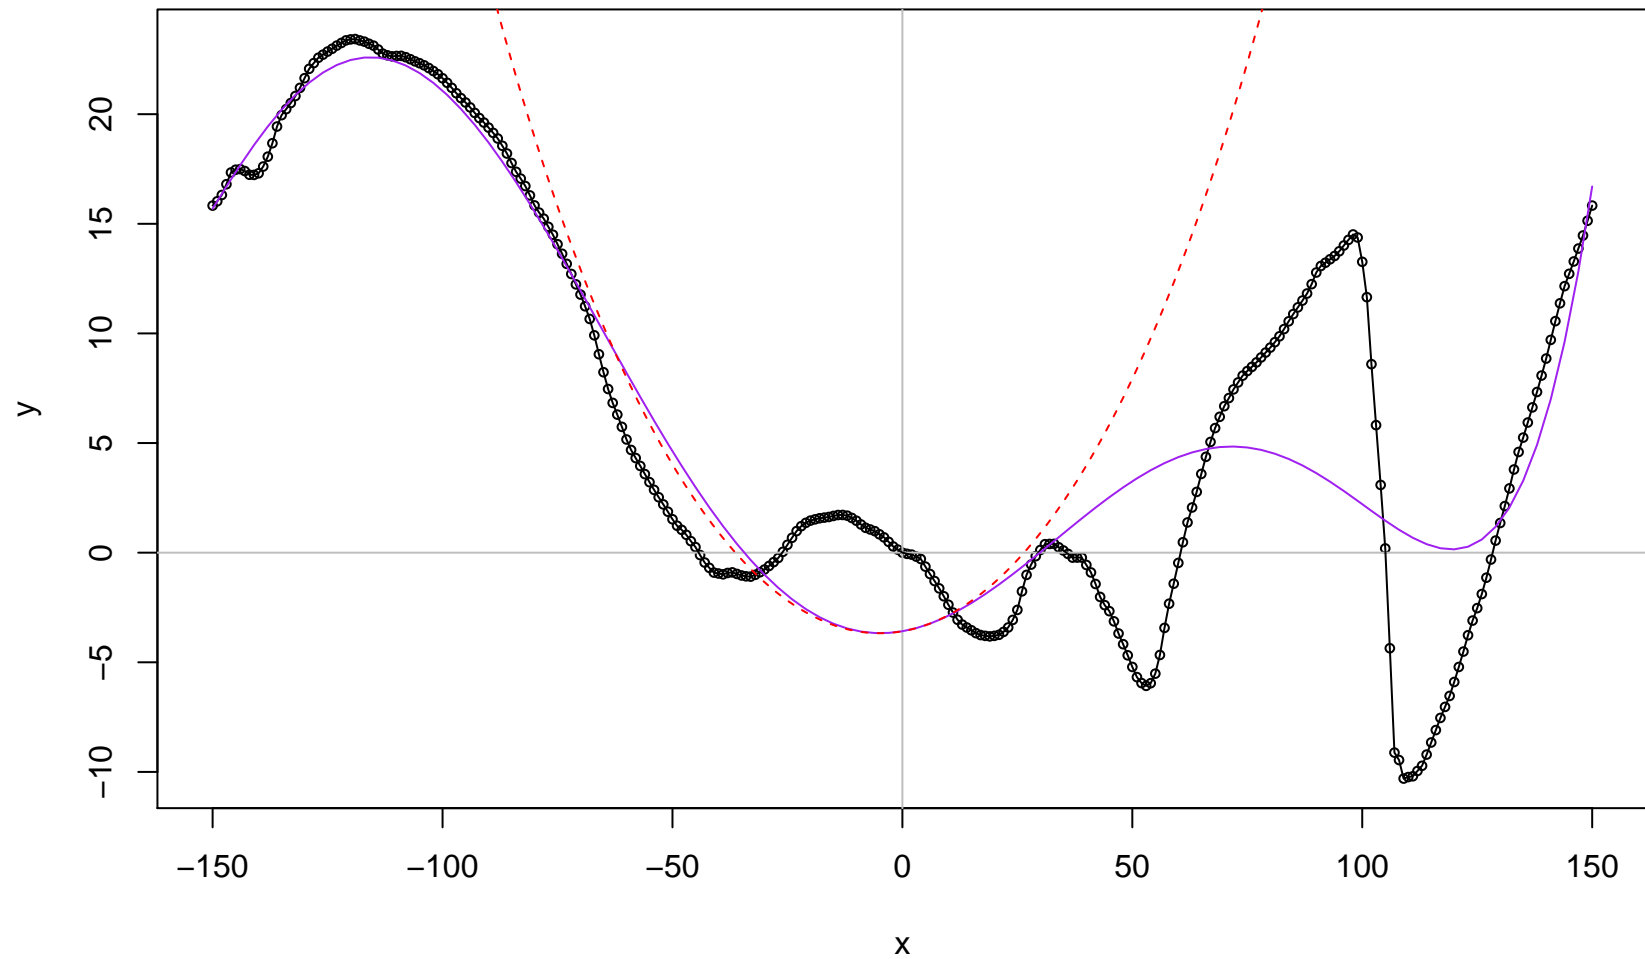

Site 221

$K*100 = -0.2013$

$R^2 = 0.9629$

radius= -496.8419

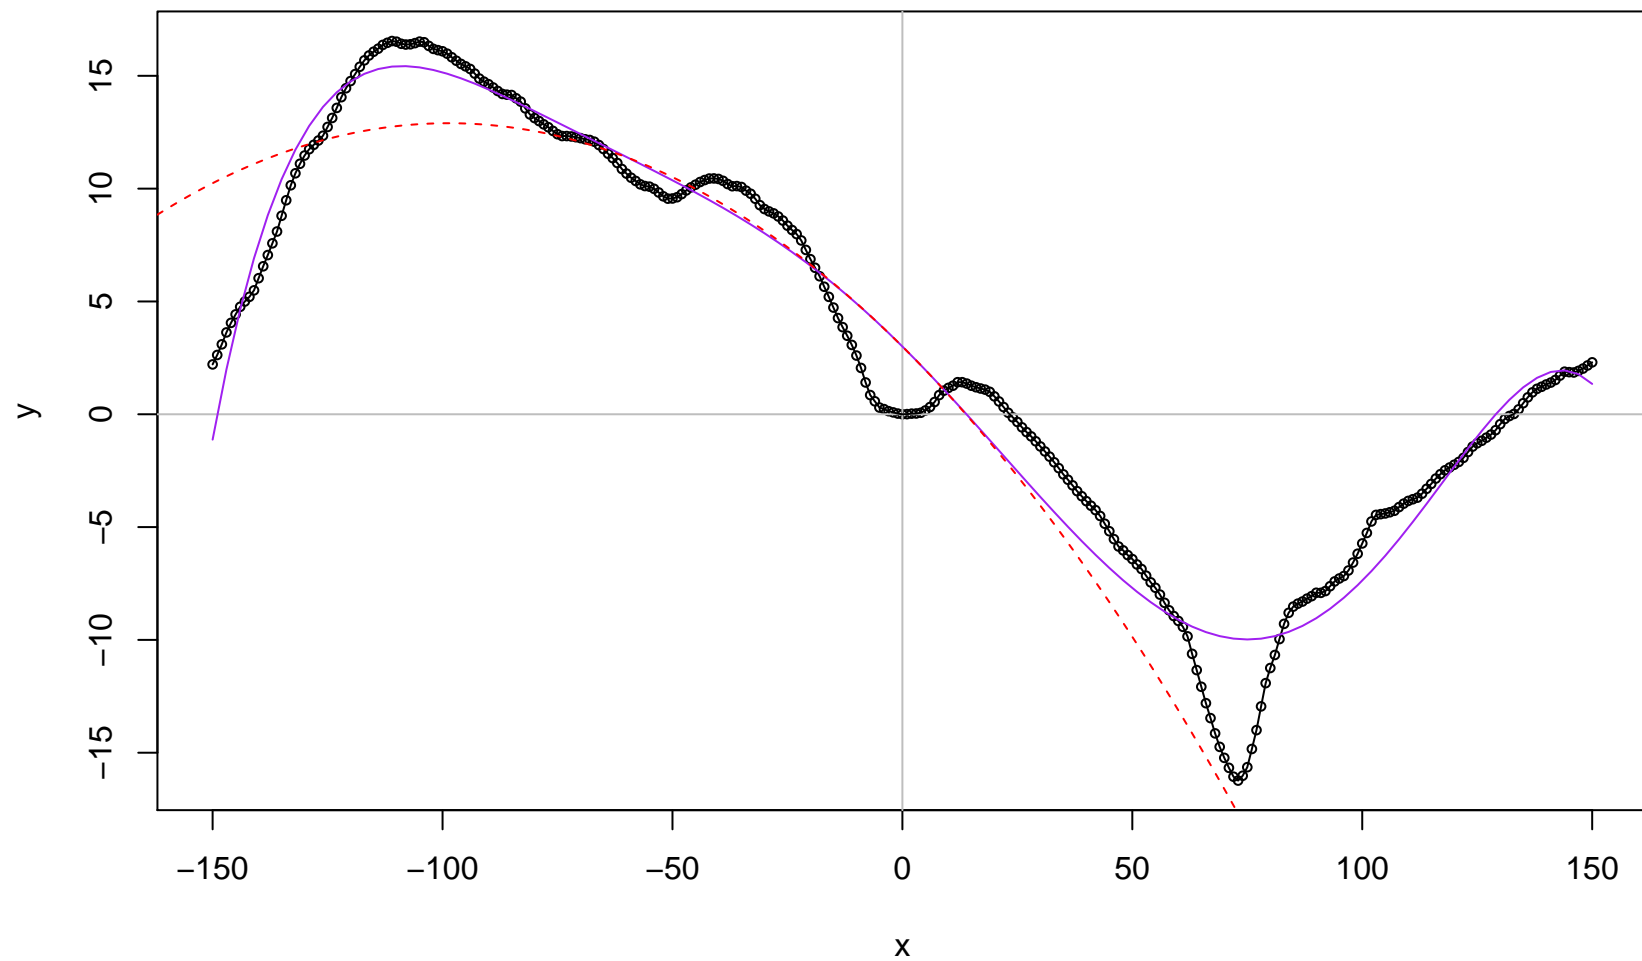

Site 222

$K*100= 0.7367$

$R^2= 0.886$

radius= 135.7341

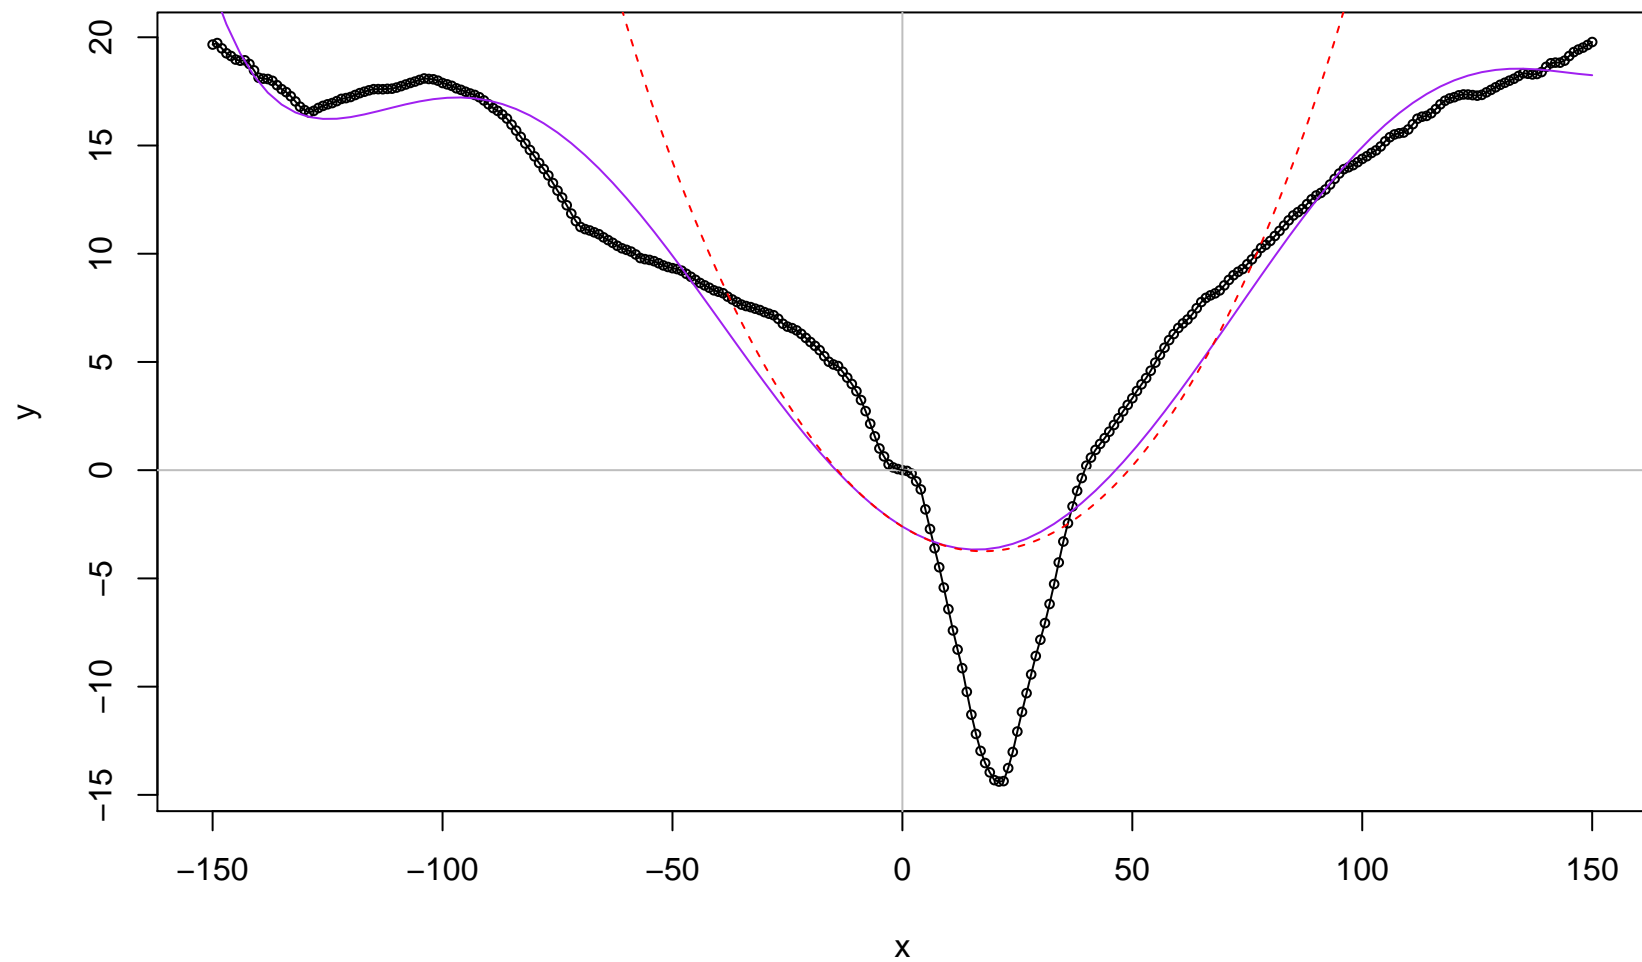

Site 223

$K*100 = -0.3112$

$R^2 = 0.9932$

radius =  $-321.3708$

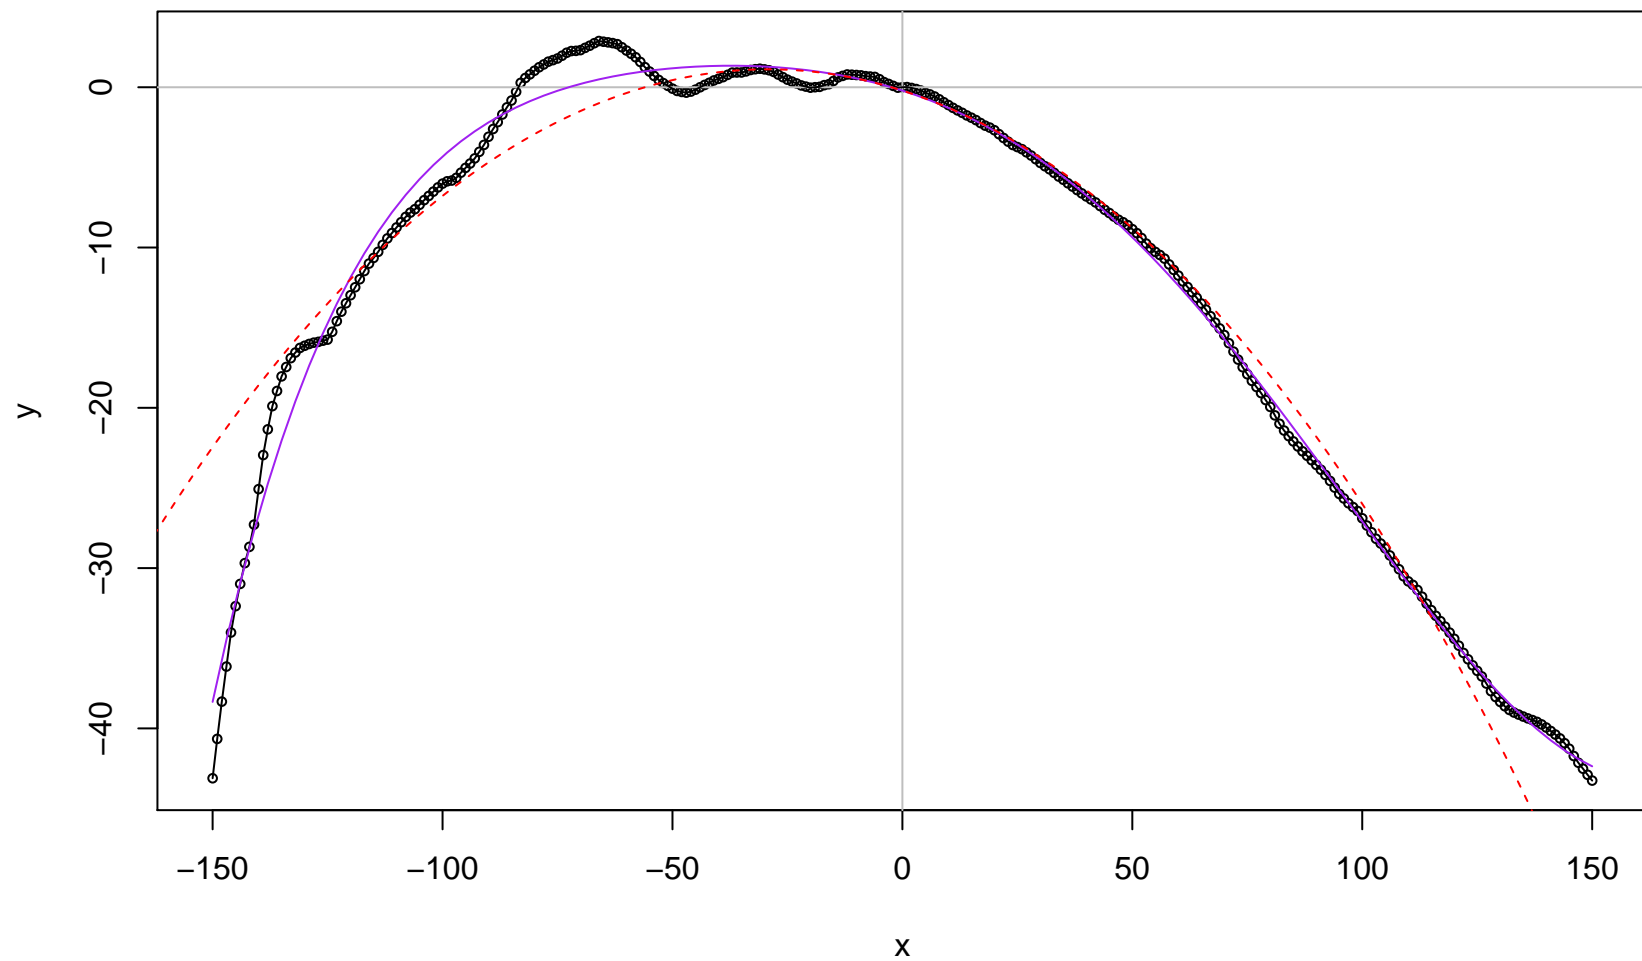

Site 224

$K \cdot 100 = -0.2043$

$R^2 = 0.9287$

radius =  $-489.5891$

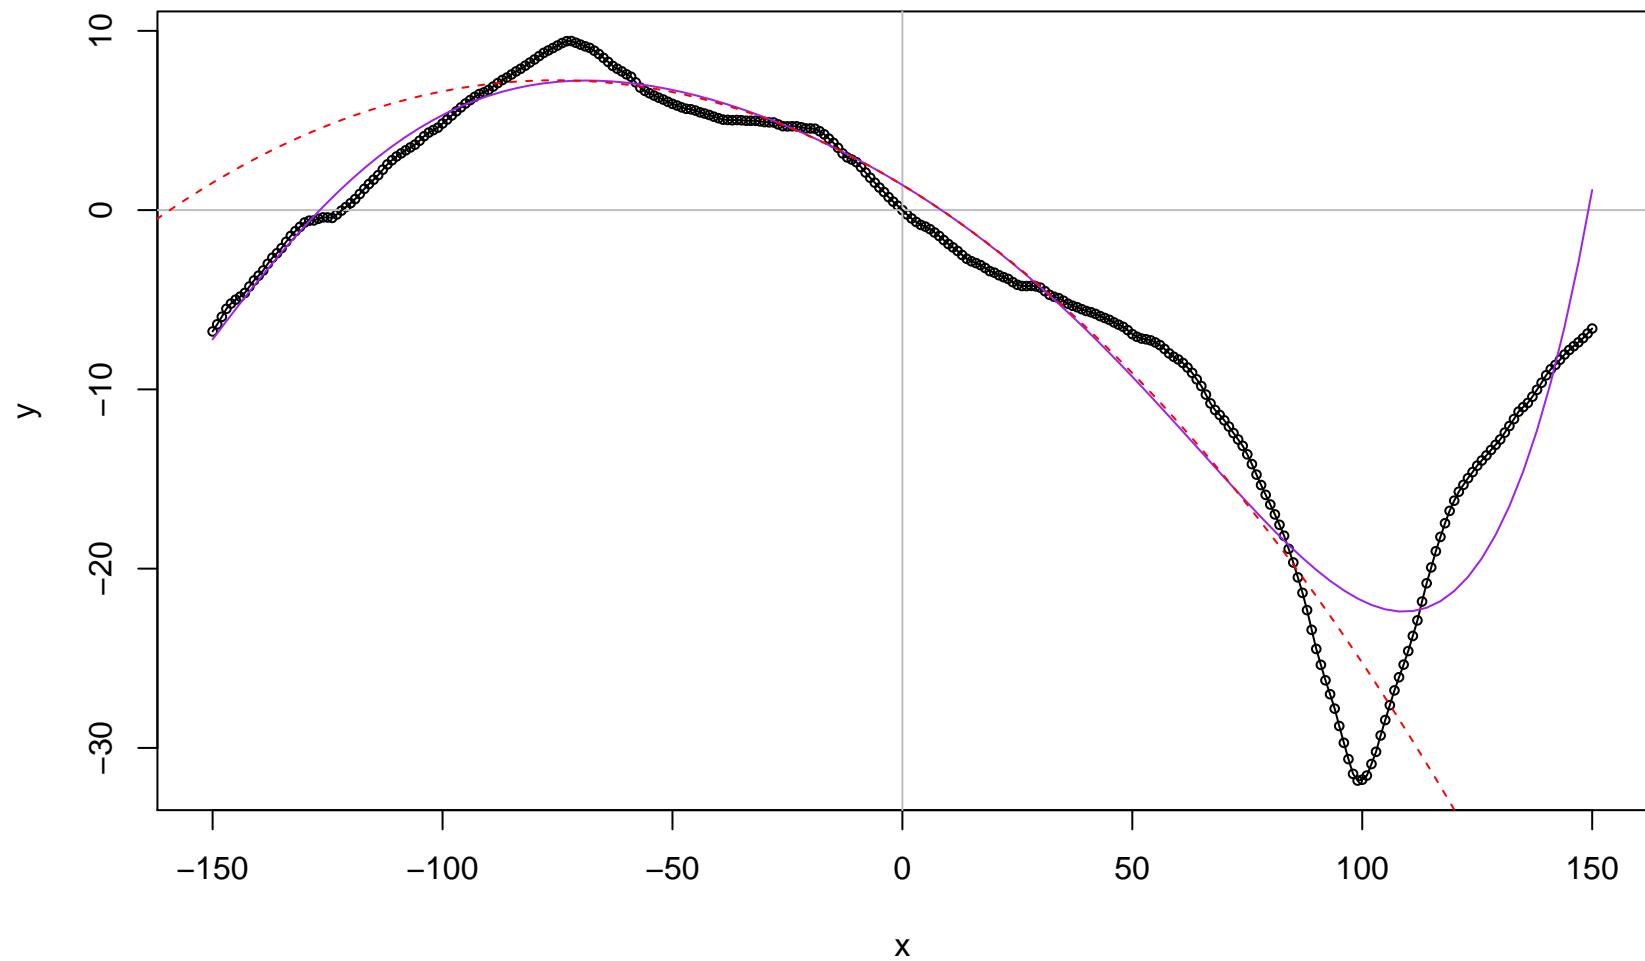



Site 225

$K*100= 1.5636$

$R^2= 0.904$

radius= 63.9549

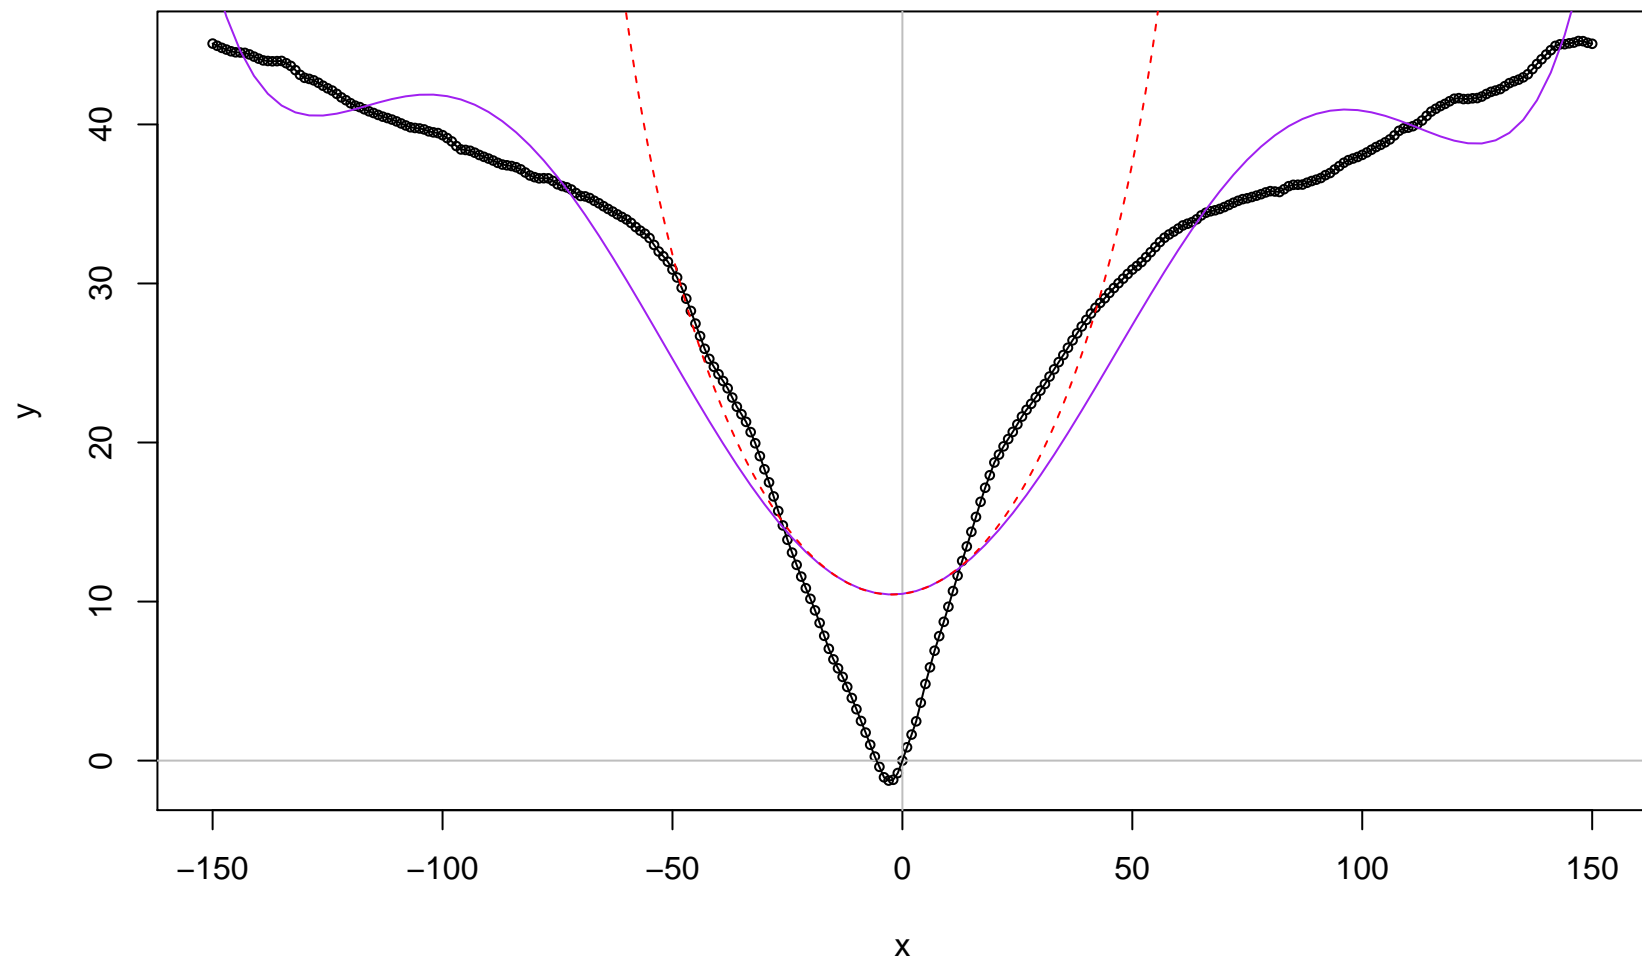

Site 226

$K \cdot 100 = 0.4632$

$R^2 = 0.9702$

radius= 215.8797

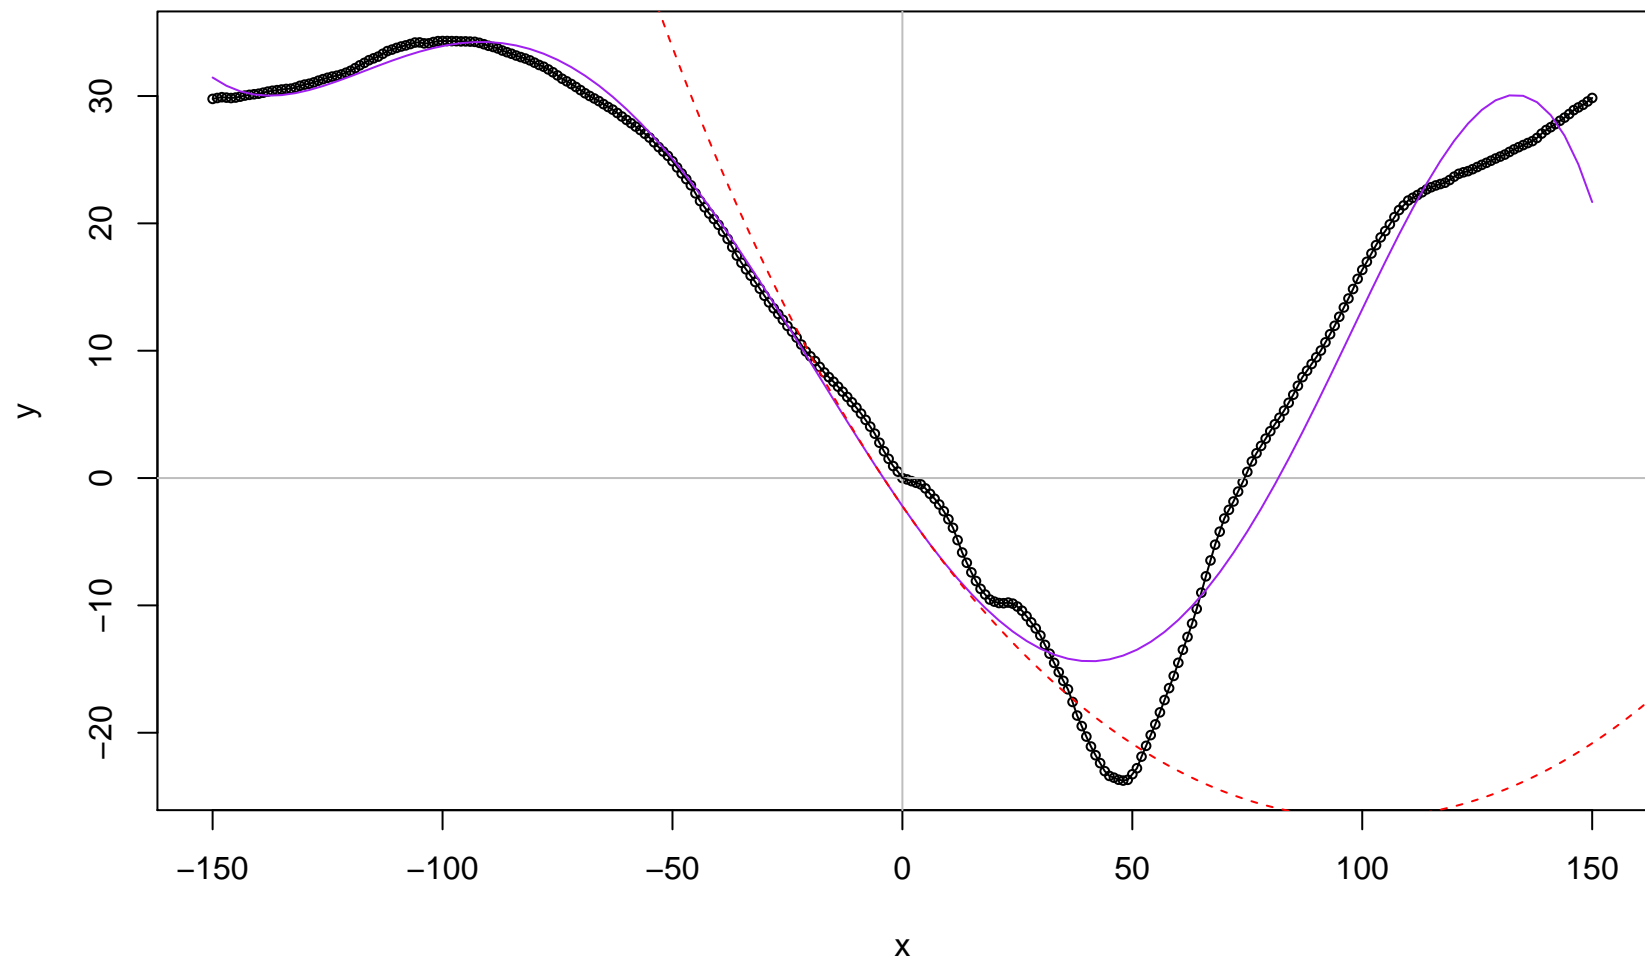

Site 227

$K*100 = -0.3712$

$R^2 = 0.9921$

radius= -269.4015

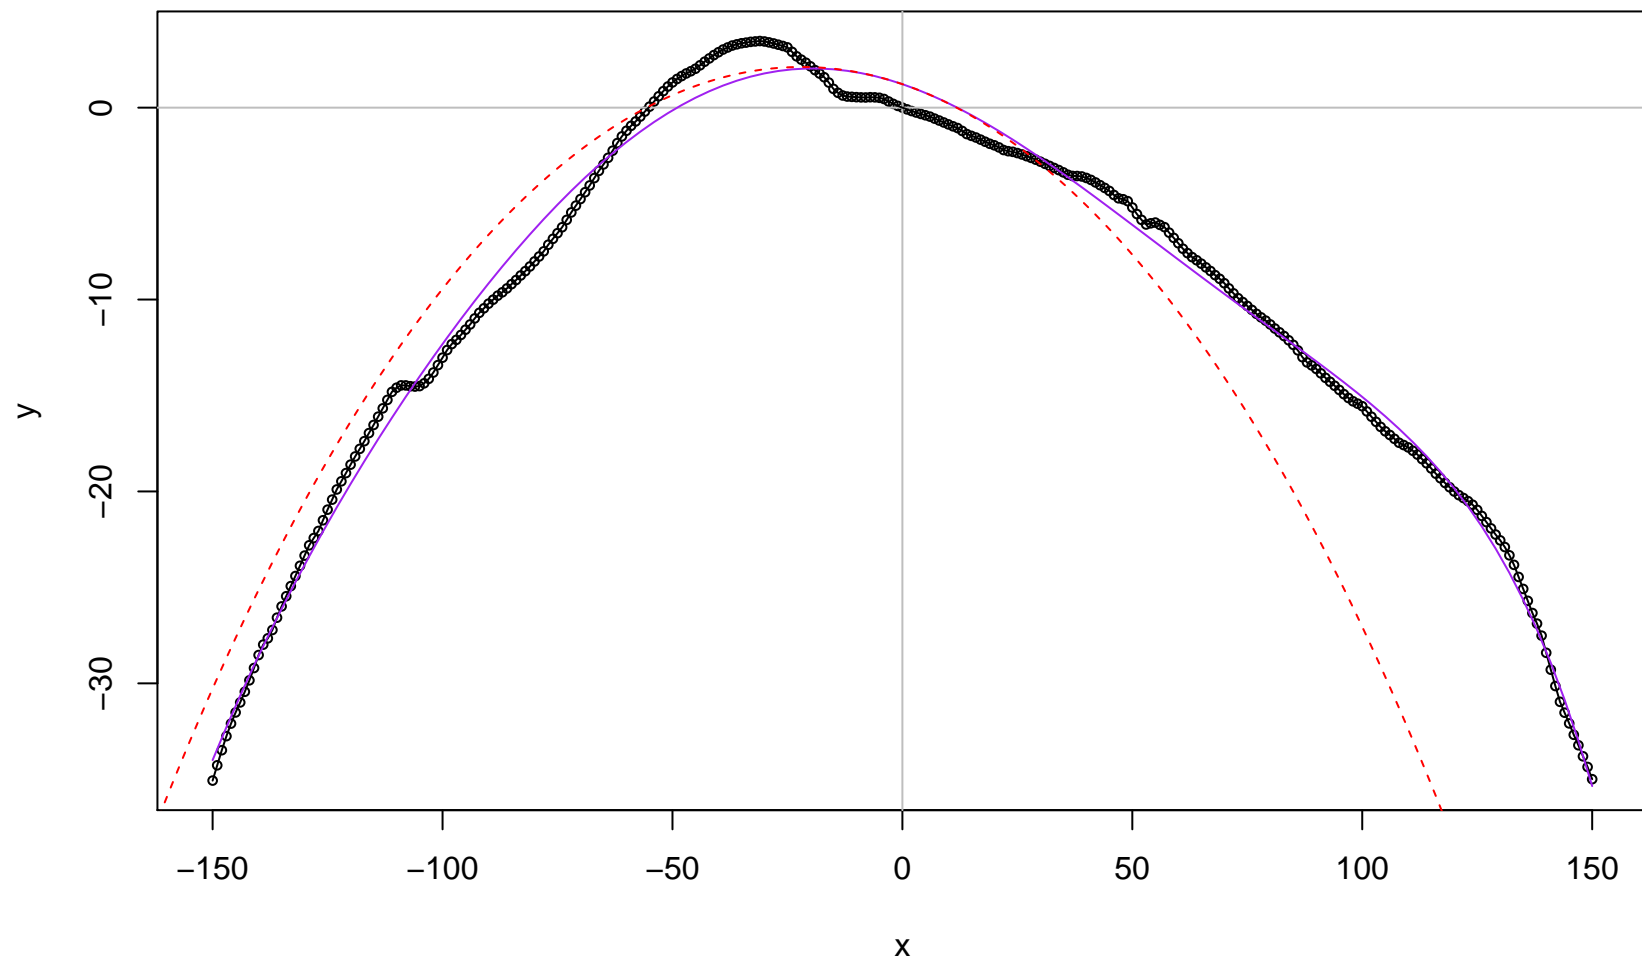

Site 228

$K*100= 1.9215$

$R^2= 0.9696$

radius= 52.0424

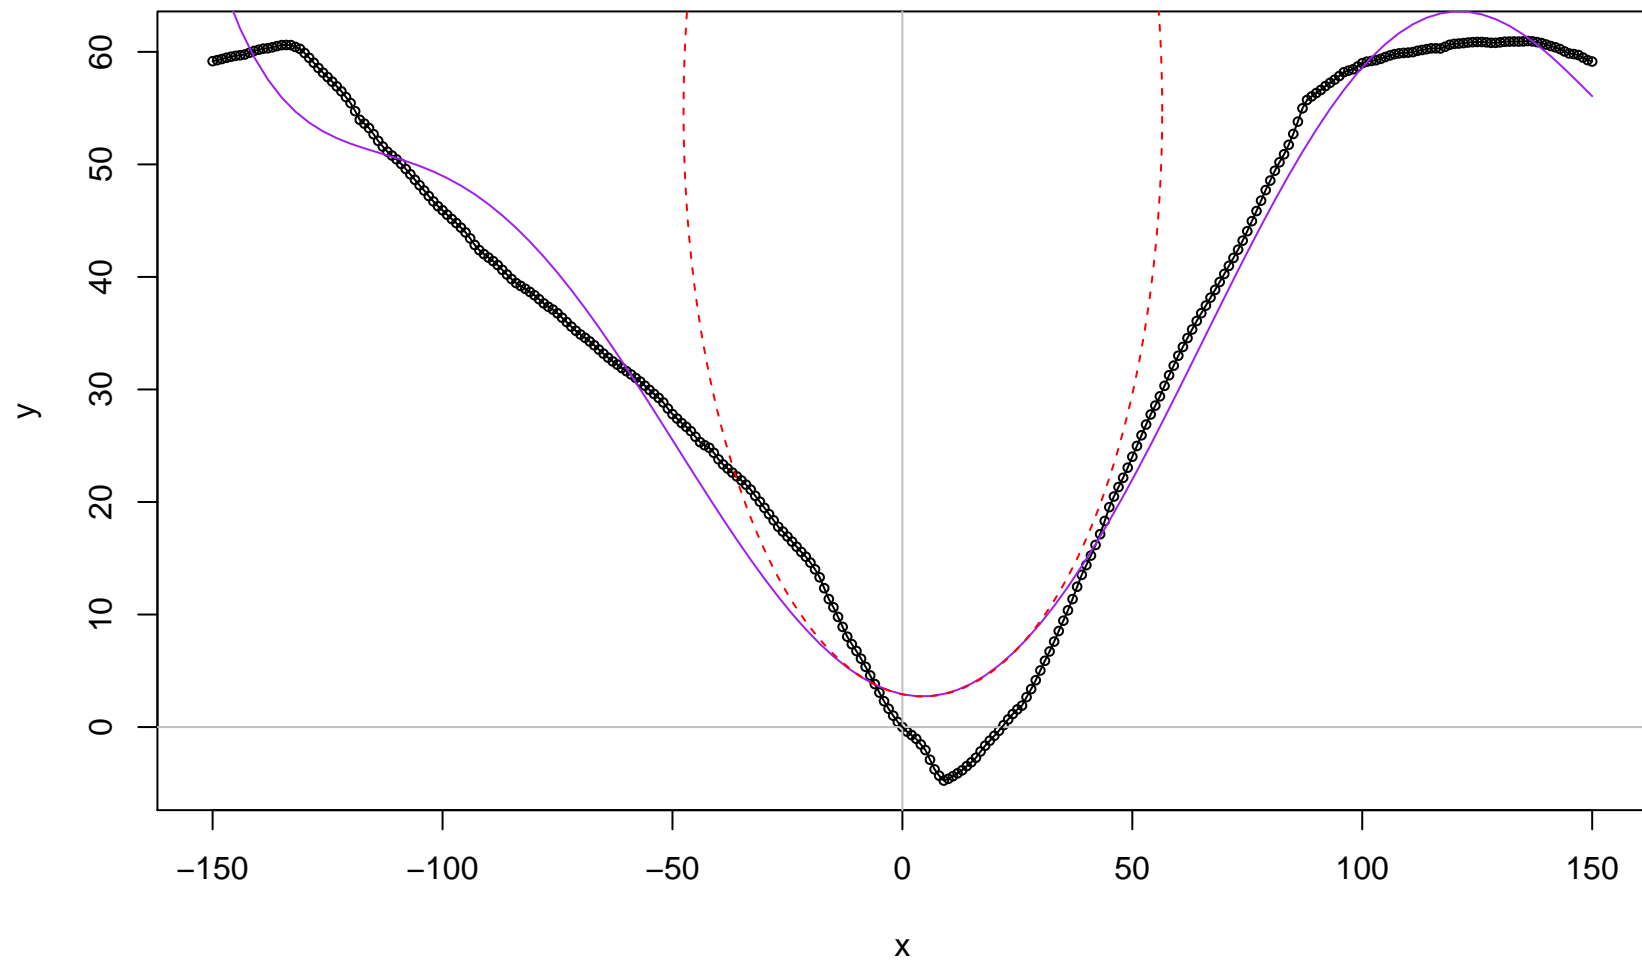

Site 229

$K*100= 1.8321$

$R2= 0.9845$

radius= 54.5812

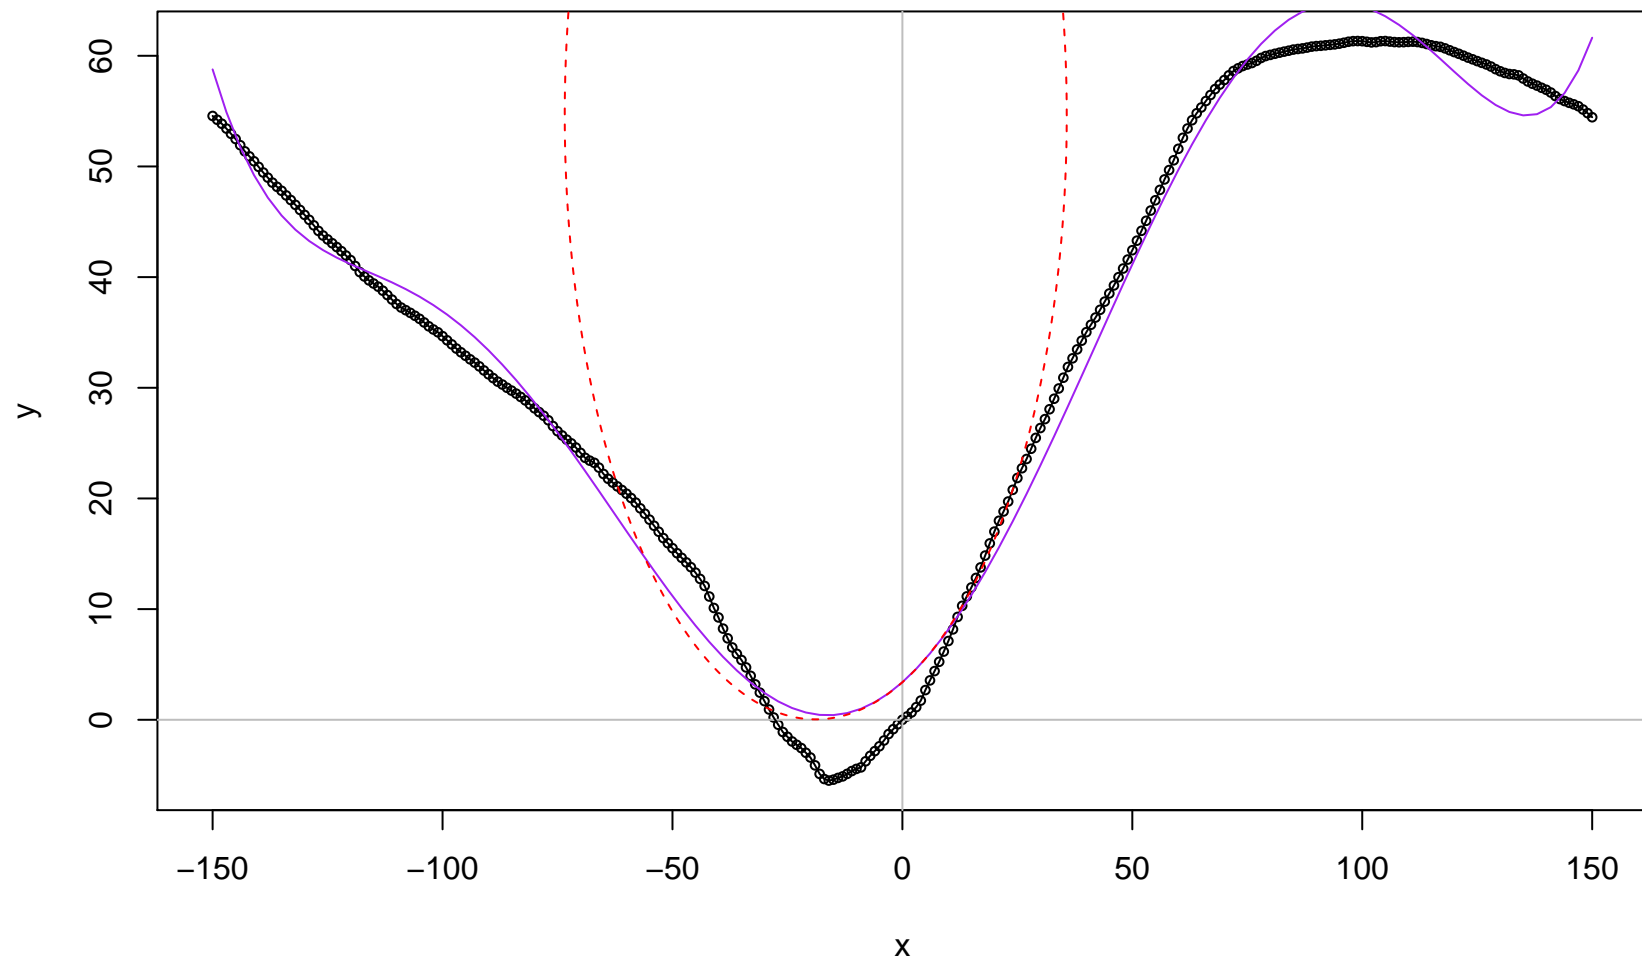

Site 230

$K \cdot 100 = -0.5298$

$R^2 = 0.9679$

radius =  $-188.7622$

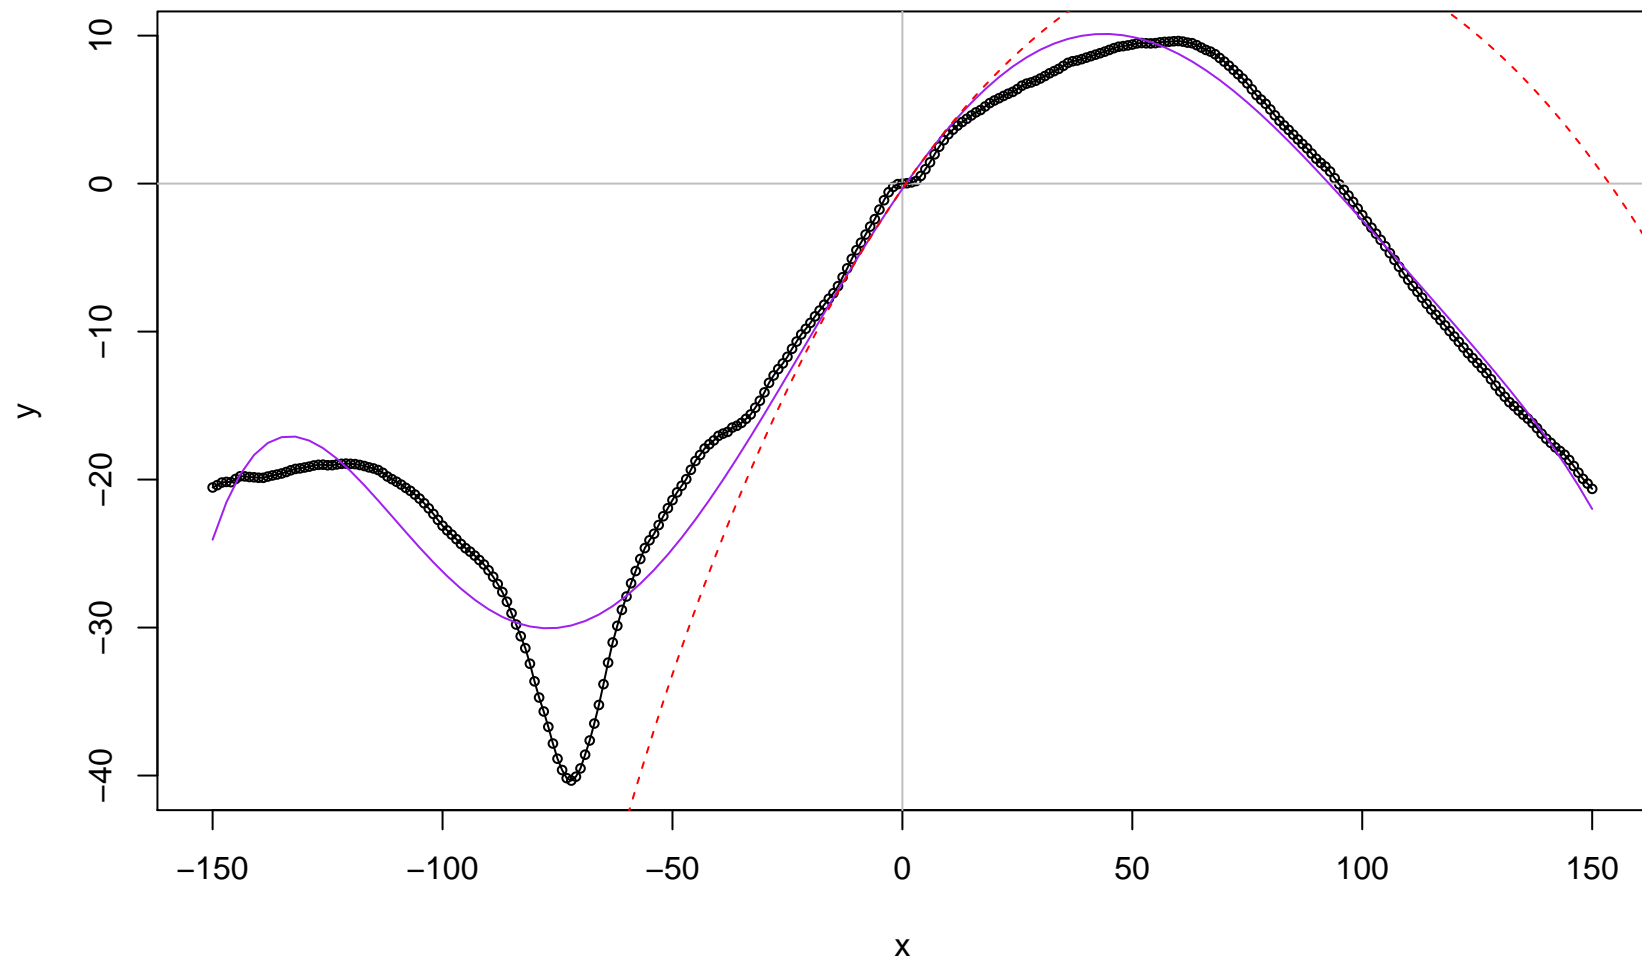

Site 231

$K*100 = -0.8117$

$R^2 = 0.9965$

radius =  $-123.2033$

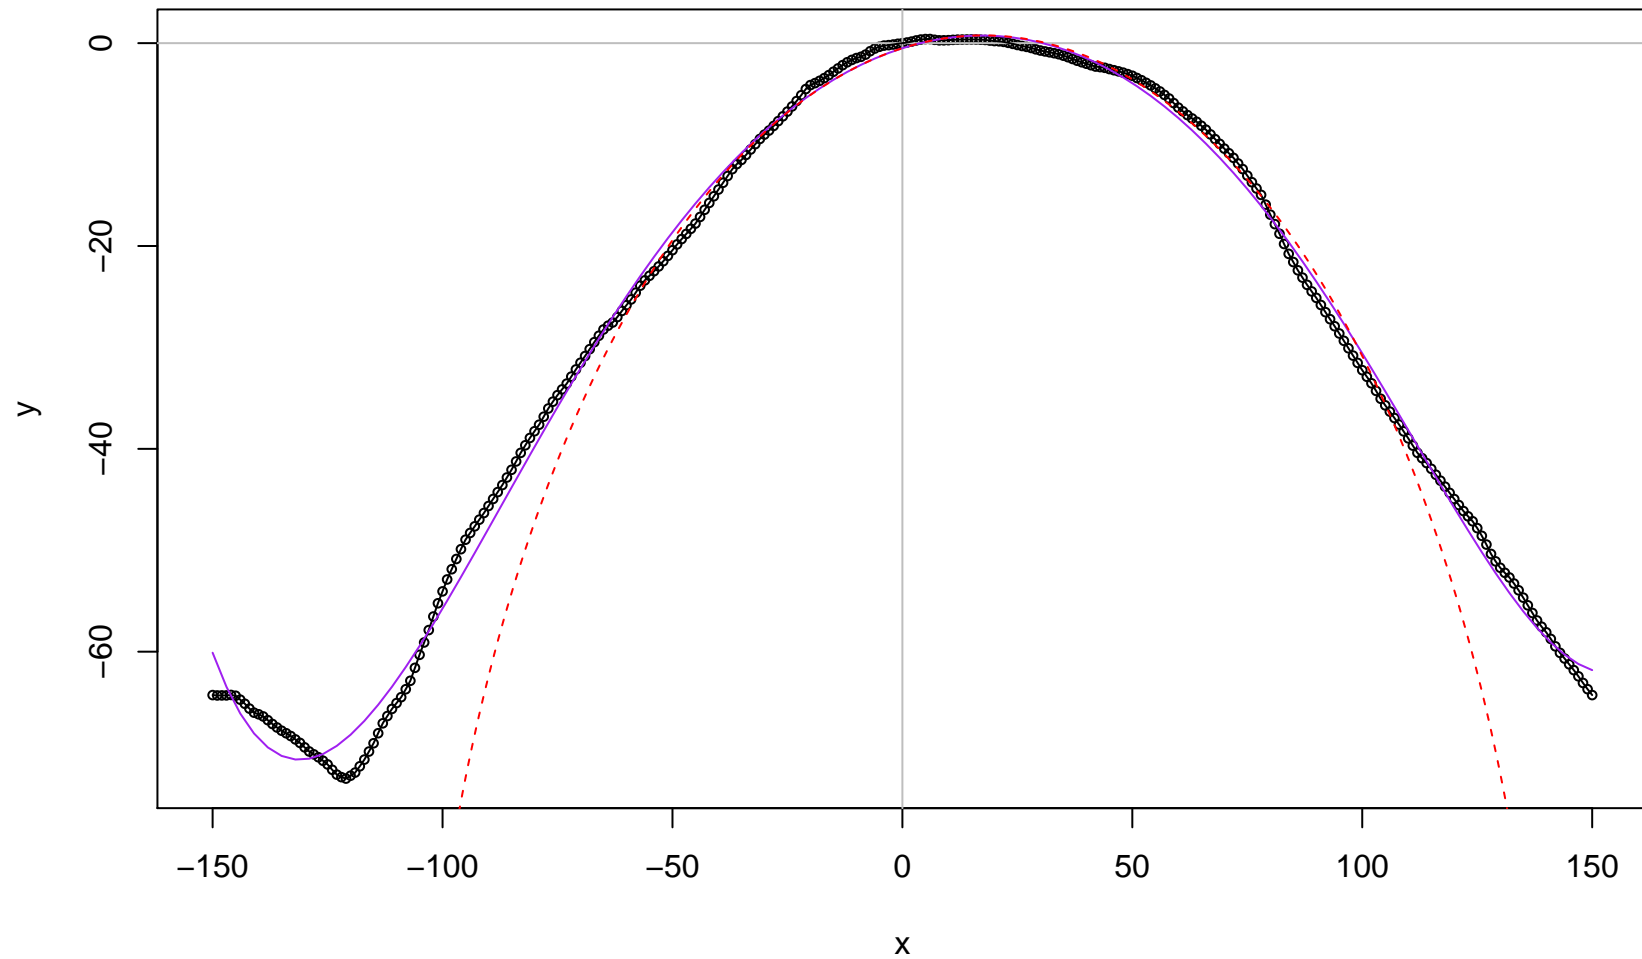

Site 232

$K \cdot 100 = -1.0346$

$R^2 = 0.9993$

radius =  $-96.6571$

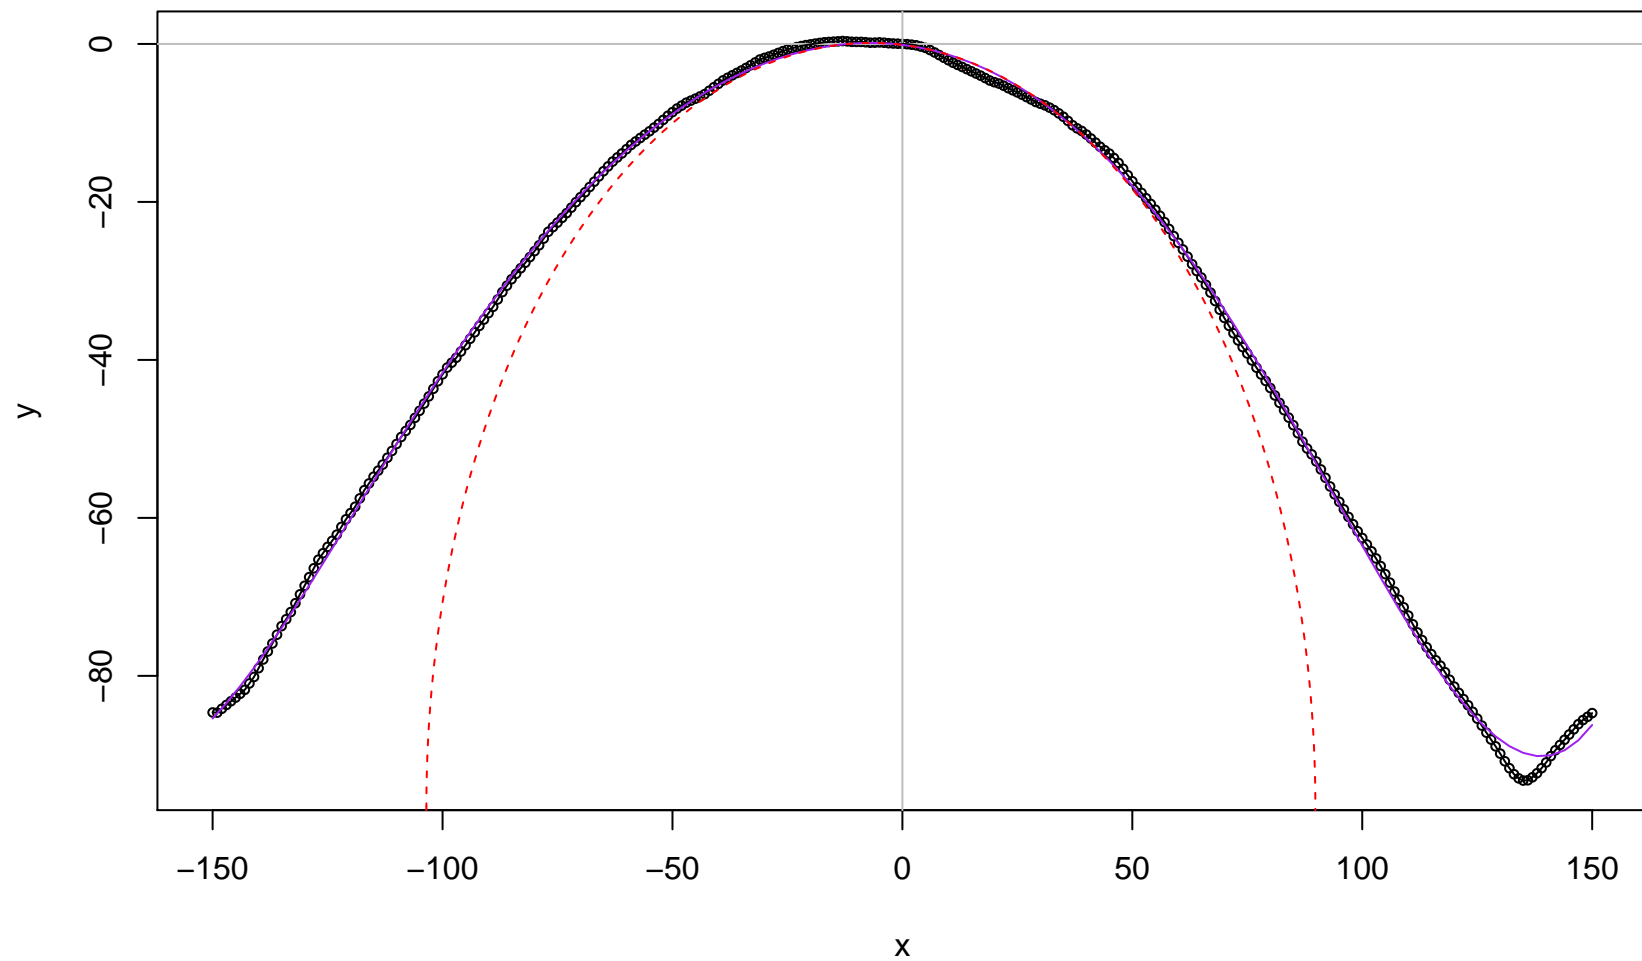



Site 233

$K \cdot 100 = 1.2423$

$R^2 = 0.951$

radius = 80.4958

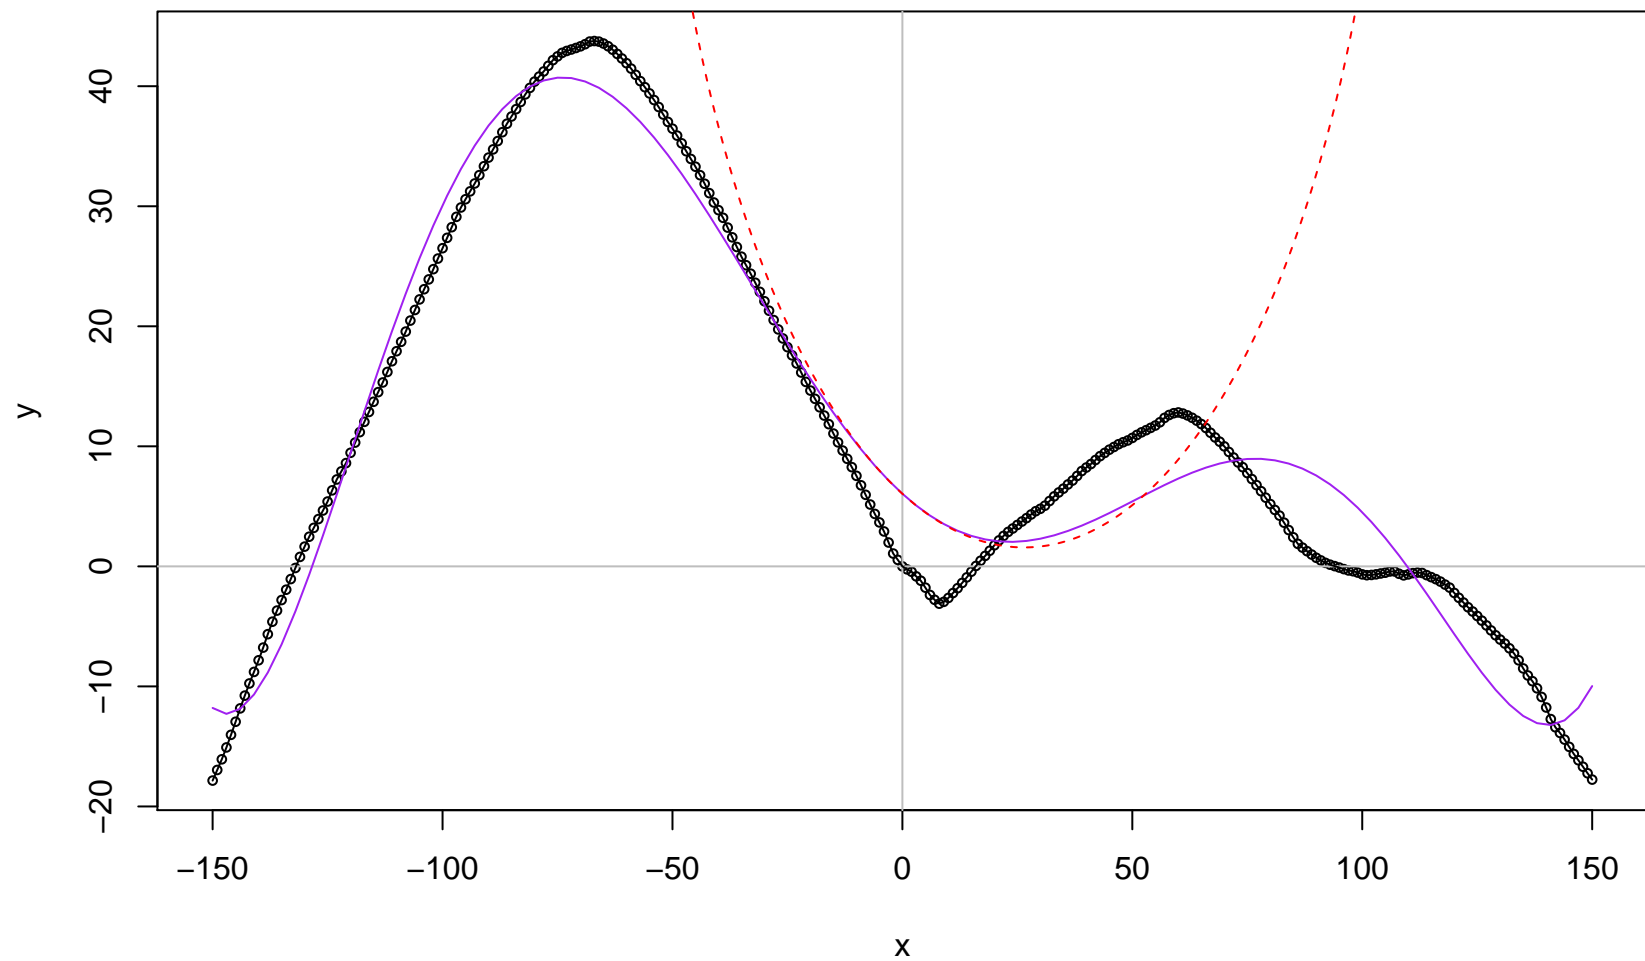

Site 234

$K*100 = -0.1951$

$R^2 = 0.9688$

radius =  $-512.5679$

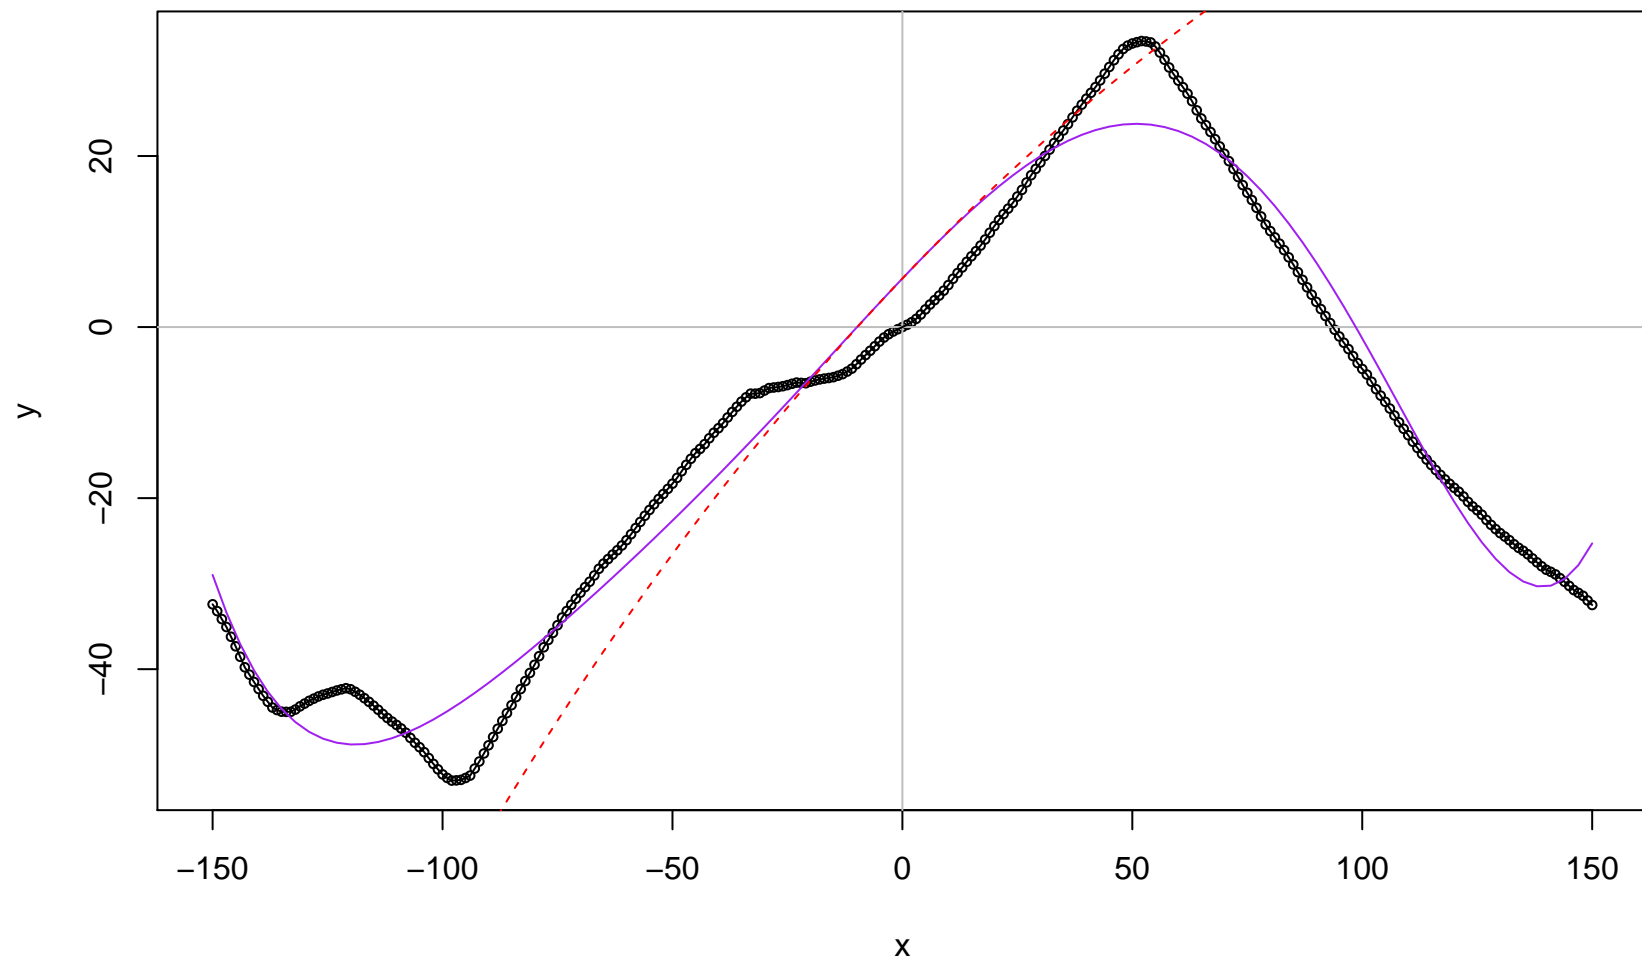

Site 235

$K \cdot 100 = 0.72$

$R^2 = 0.9901$

radius= 138.8867

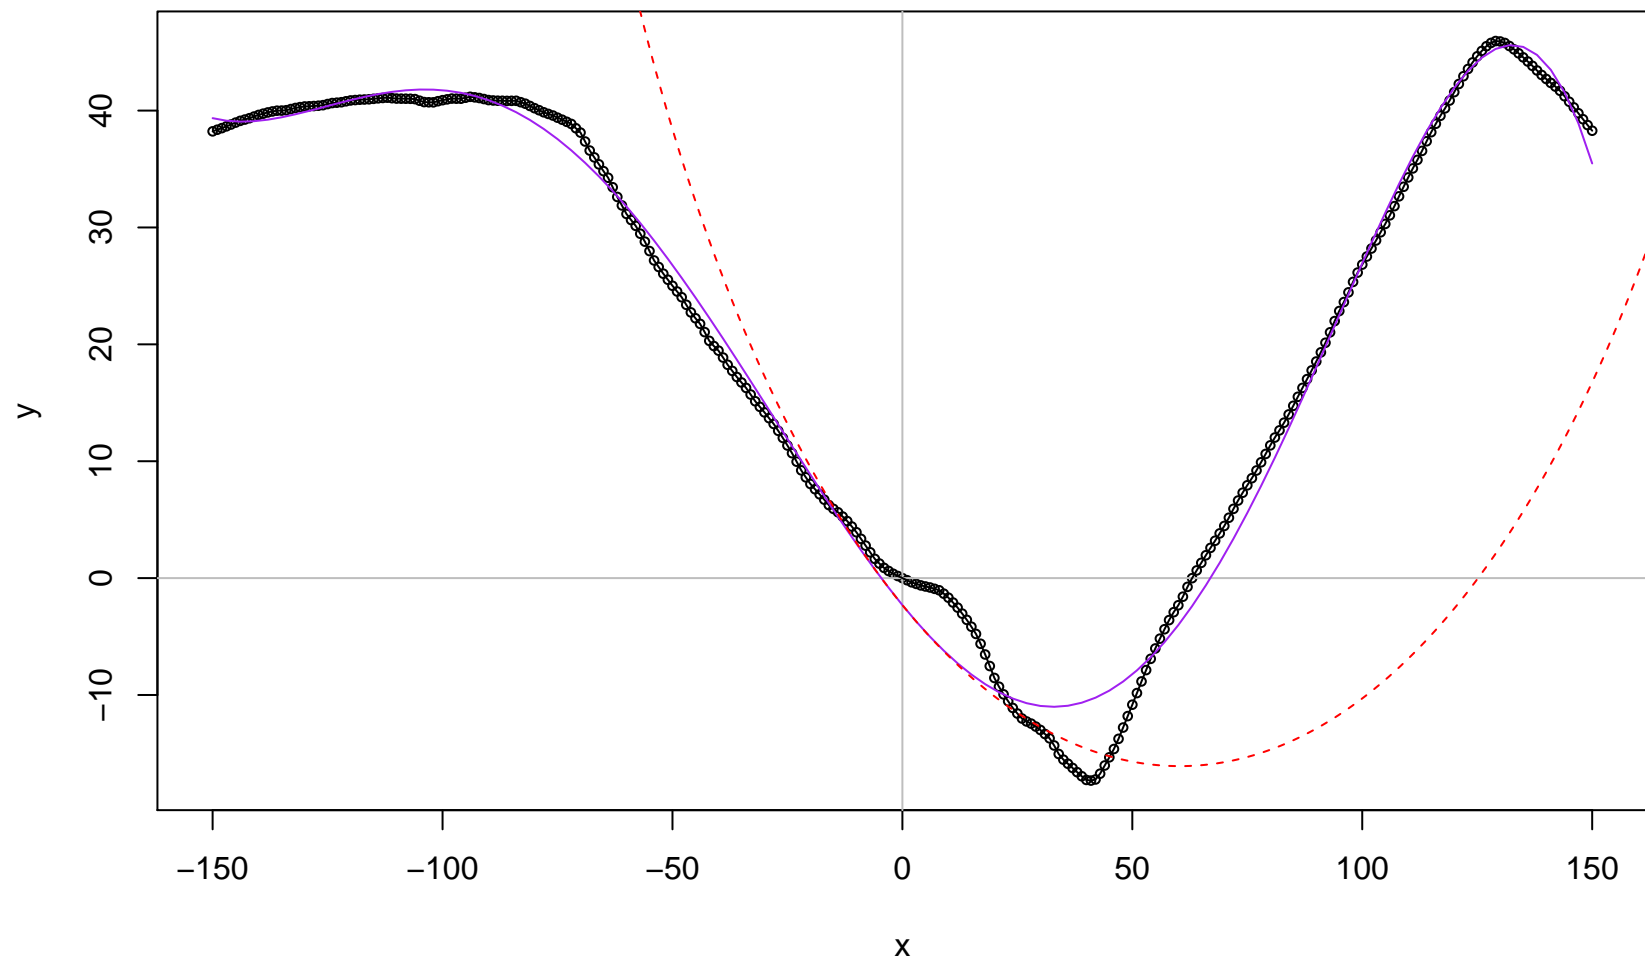

Site 236

$K*100= 0.2575$

$R^2= 0.9529$

radius= 388.3429

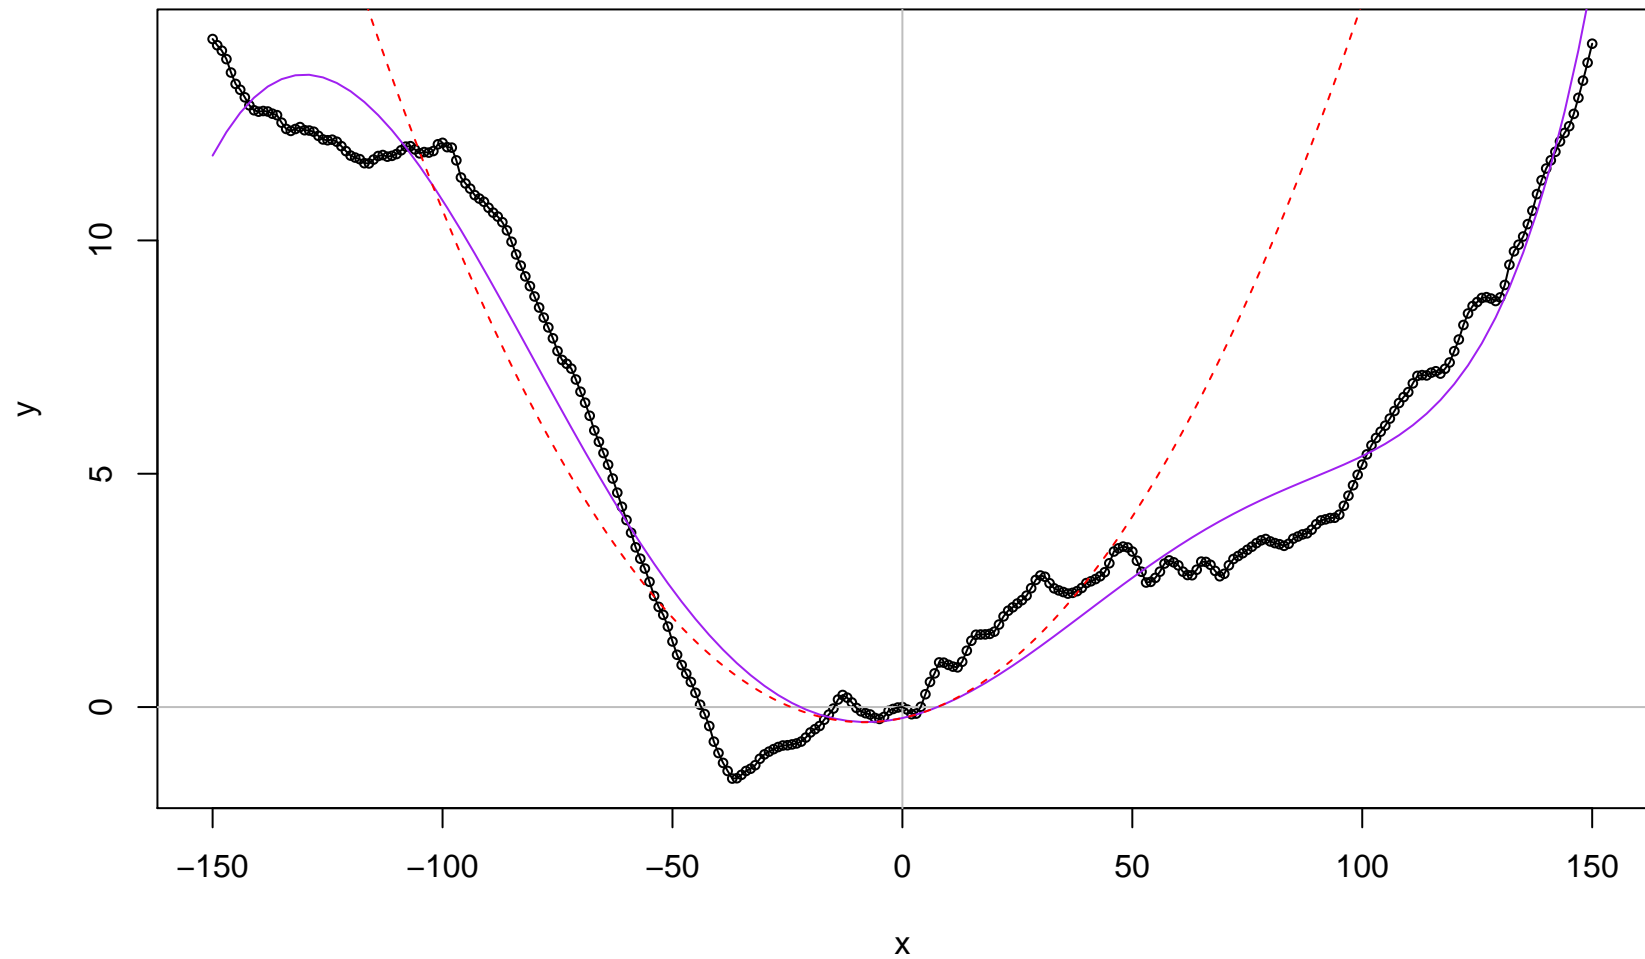

Site 237

$K*100= 0.5646$

$R^2= 0.9617$

radius= 177.1253

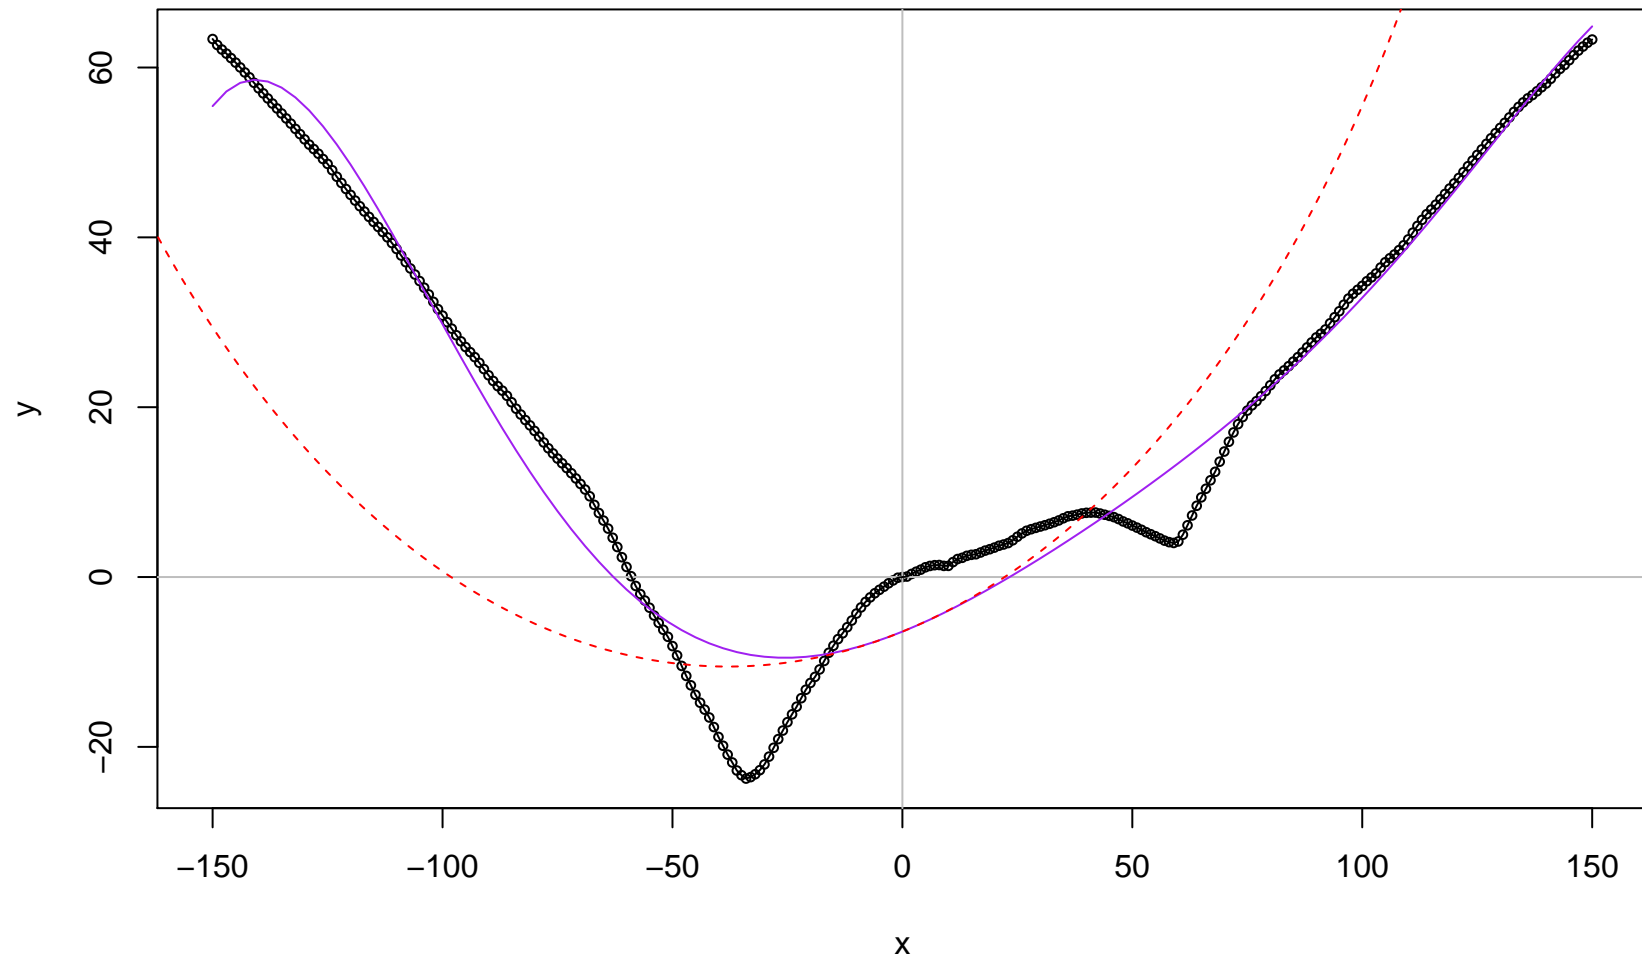

Site 238

$K \cdot 100 = 0.4498$

$R^2 = 0.9661$

radius= 222.3179

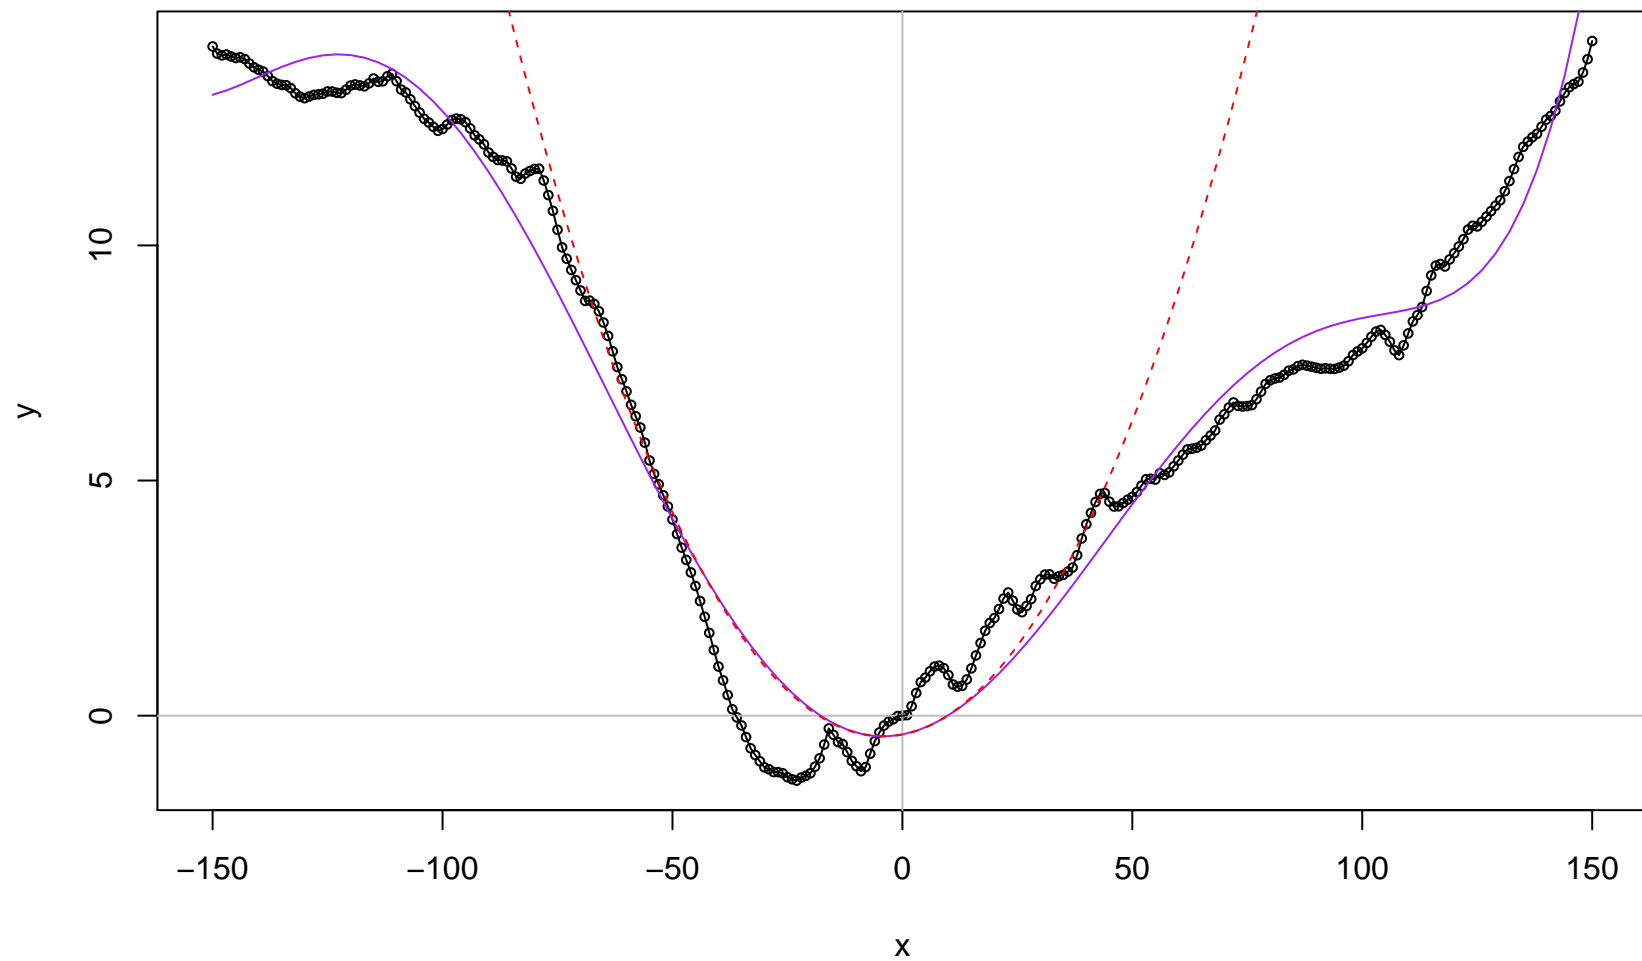

Site 239

$K \cdot 100 = 0.1264$

$R^2 = 0.9291$

radius= 791.0894

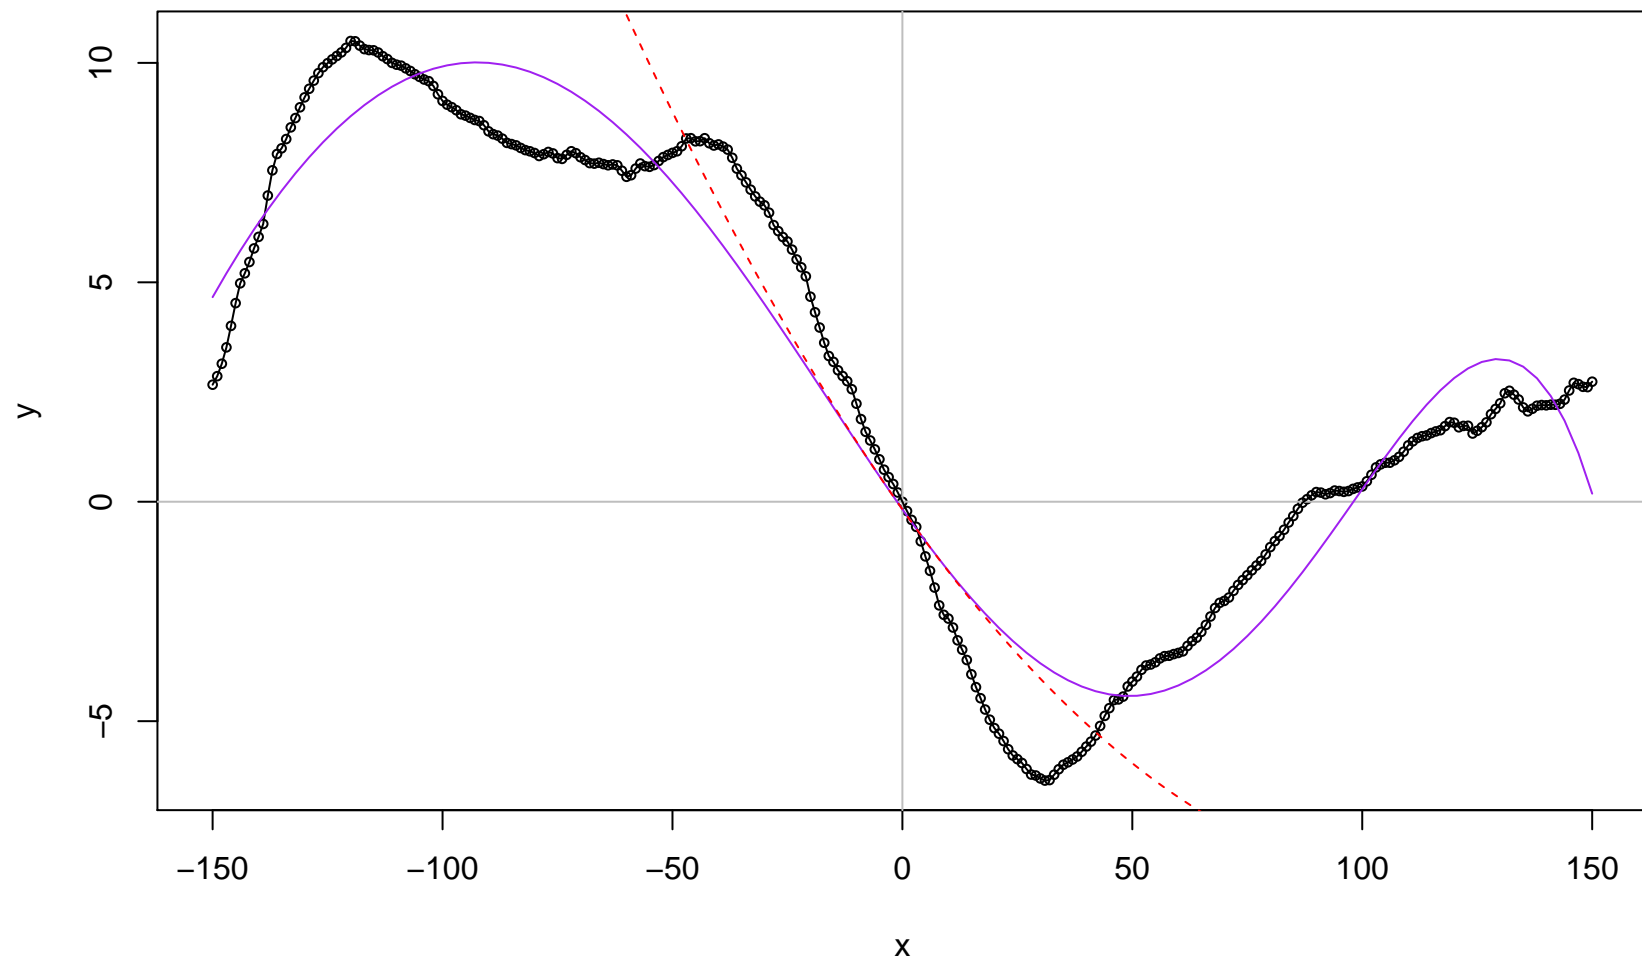

Site 240

$K \cdot 100 = 0.2474$

$R^2 = 0.9721$

radius= 404.1953

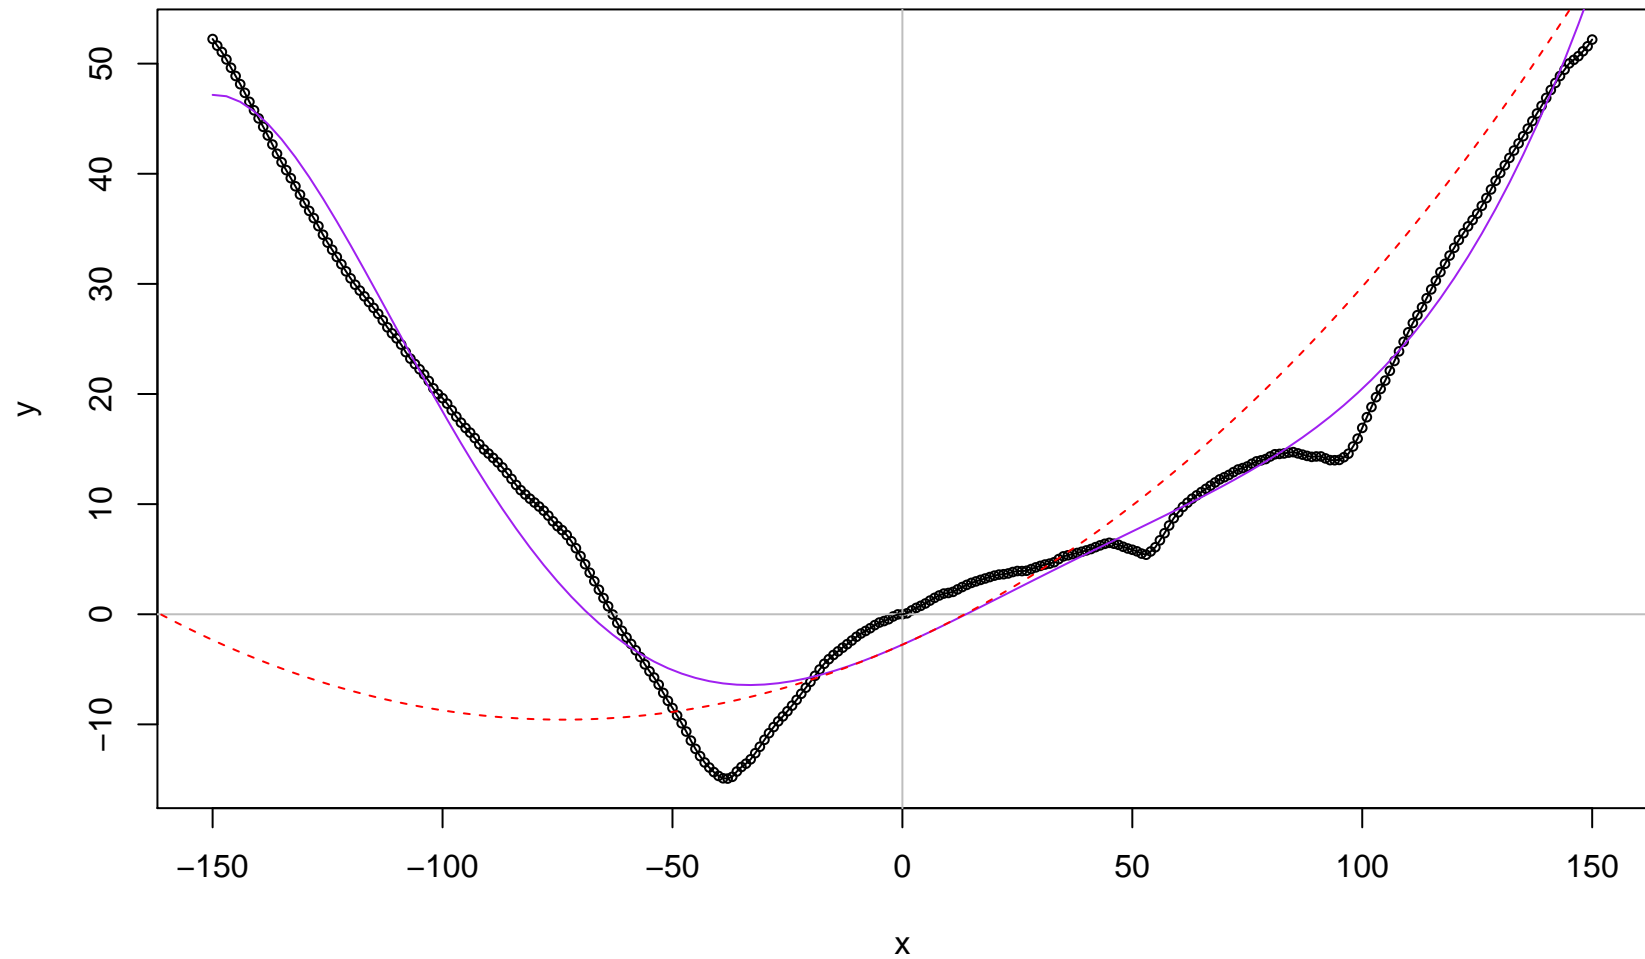



Site 241

$K \cdot 100 = 1.2251$

$R^2 = 0.9807$

radius= 81.6255

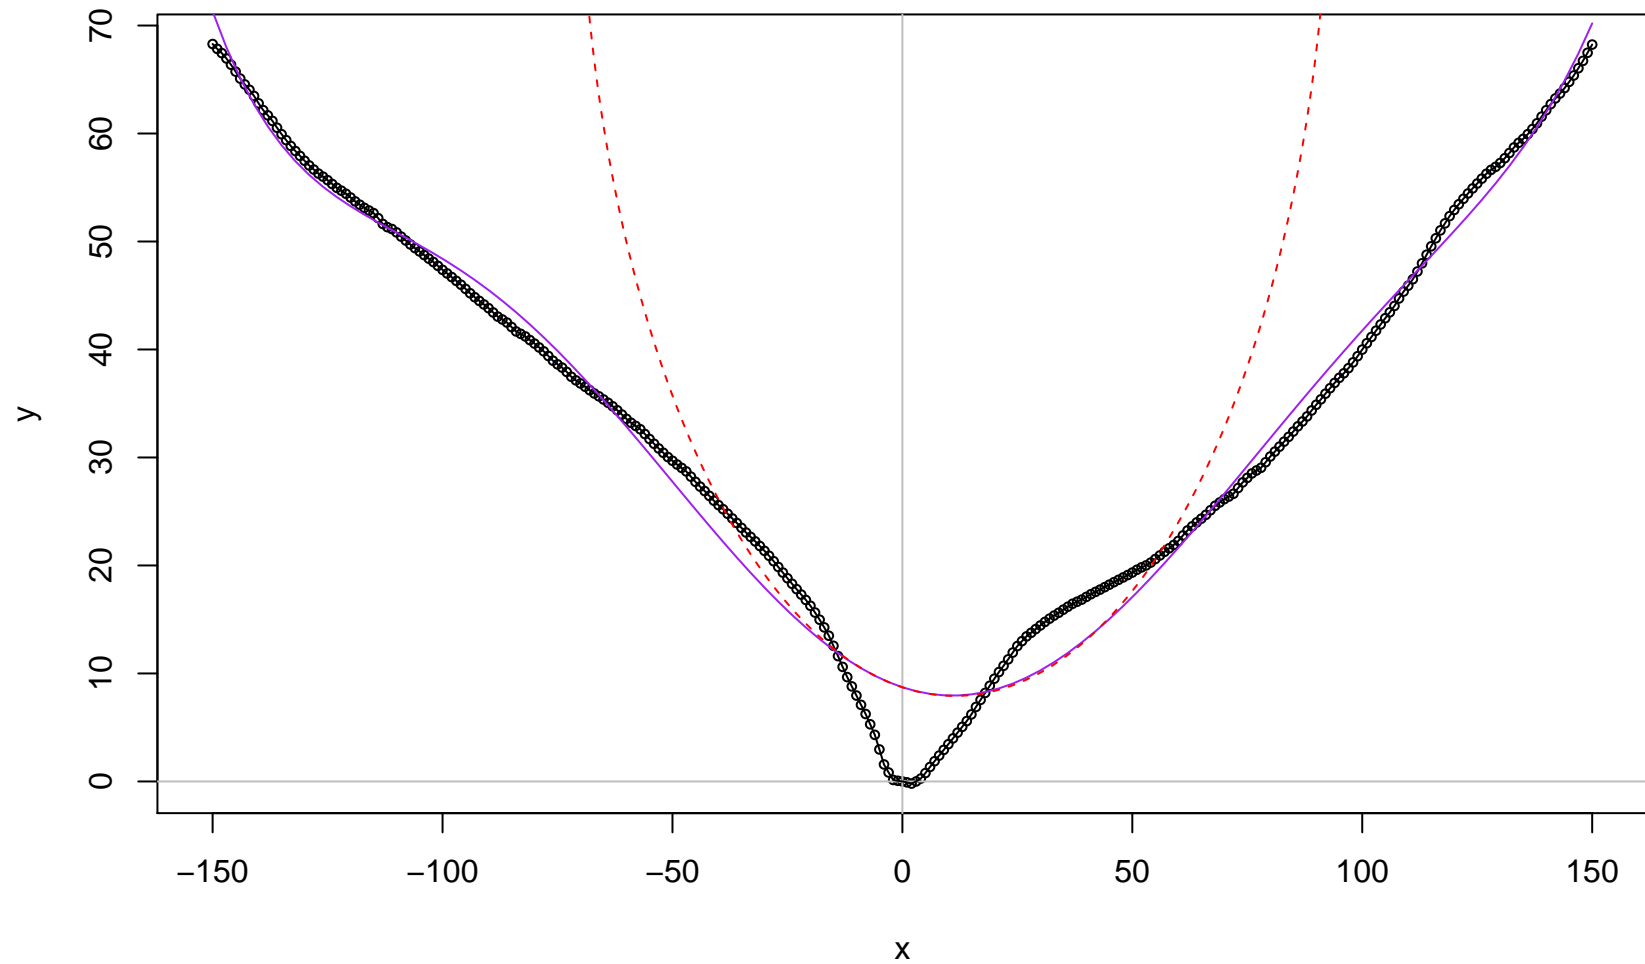

Site 242

$K \cdot 100 = 0.6936$

$R^2 = 0.9796$

radius= 144.1673

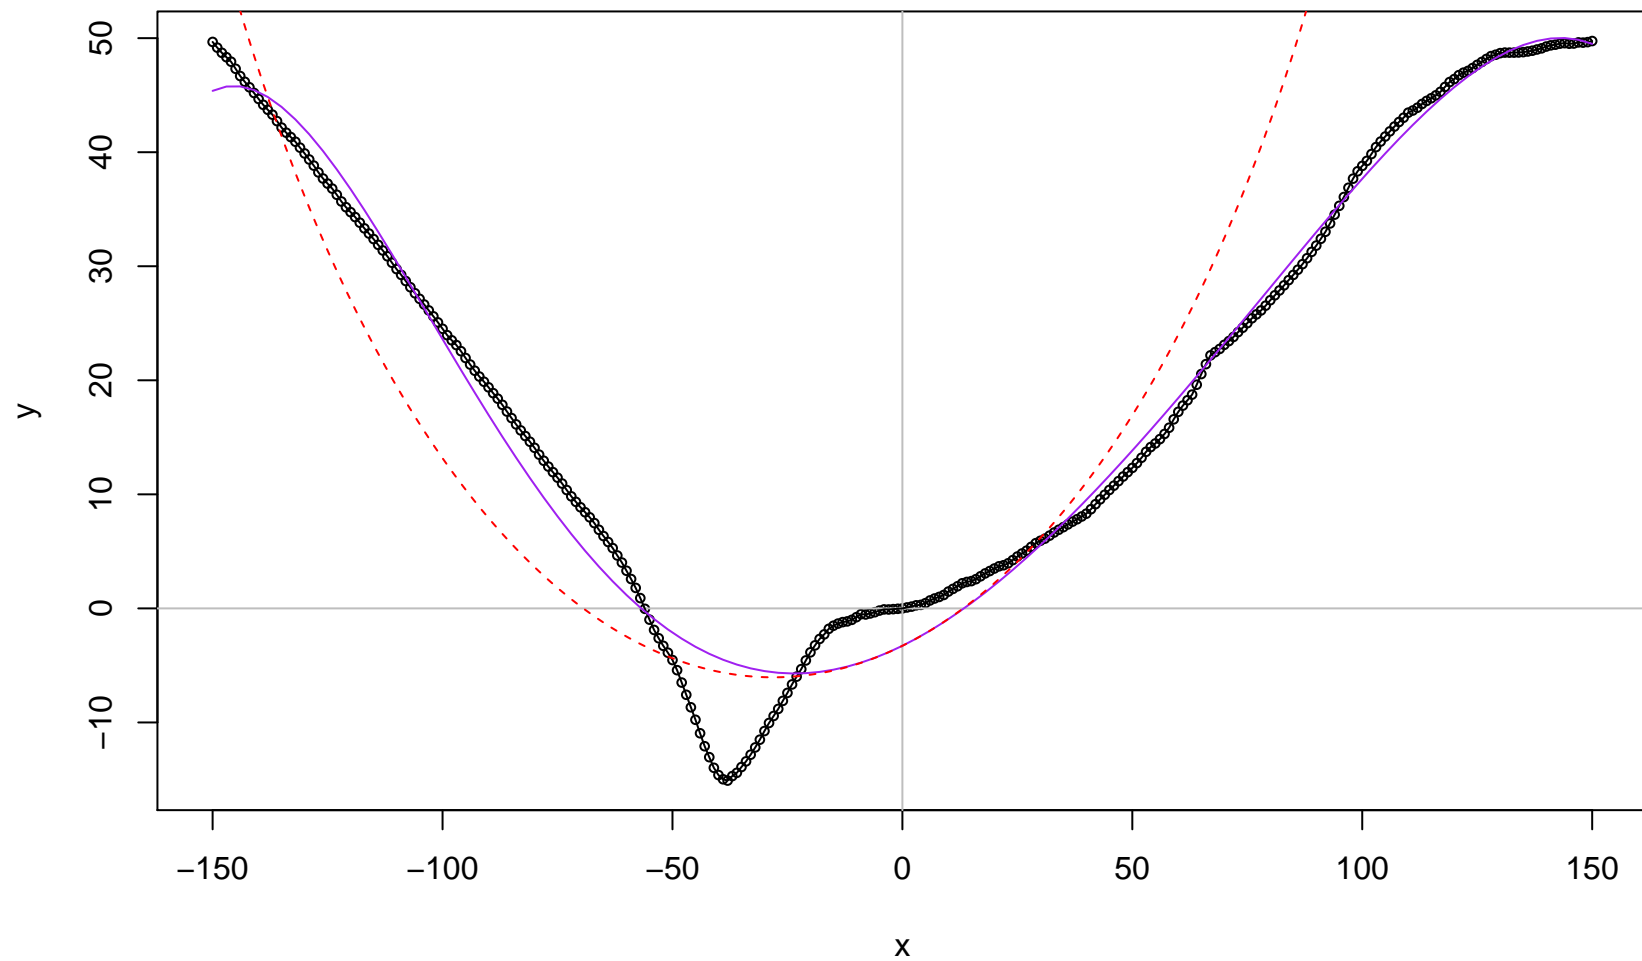

Site 243

$K \cdot 100 = 1.7412$

$R^2 = 0.9659$

radius = 57.4312

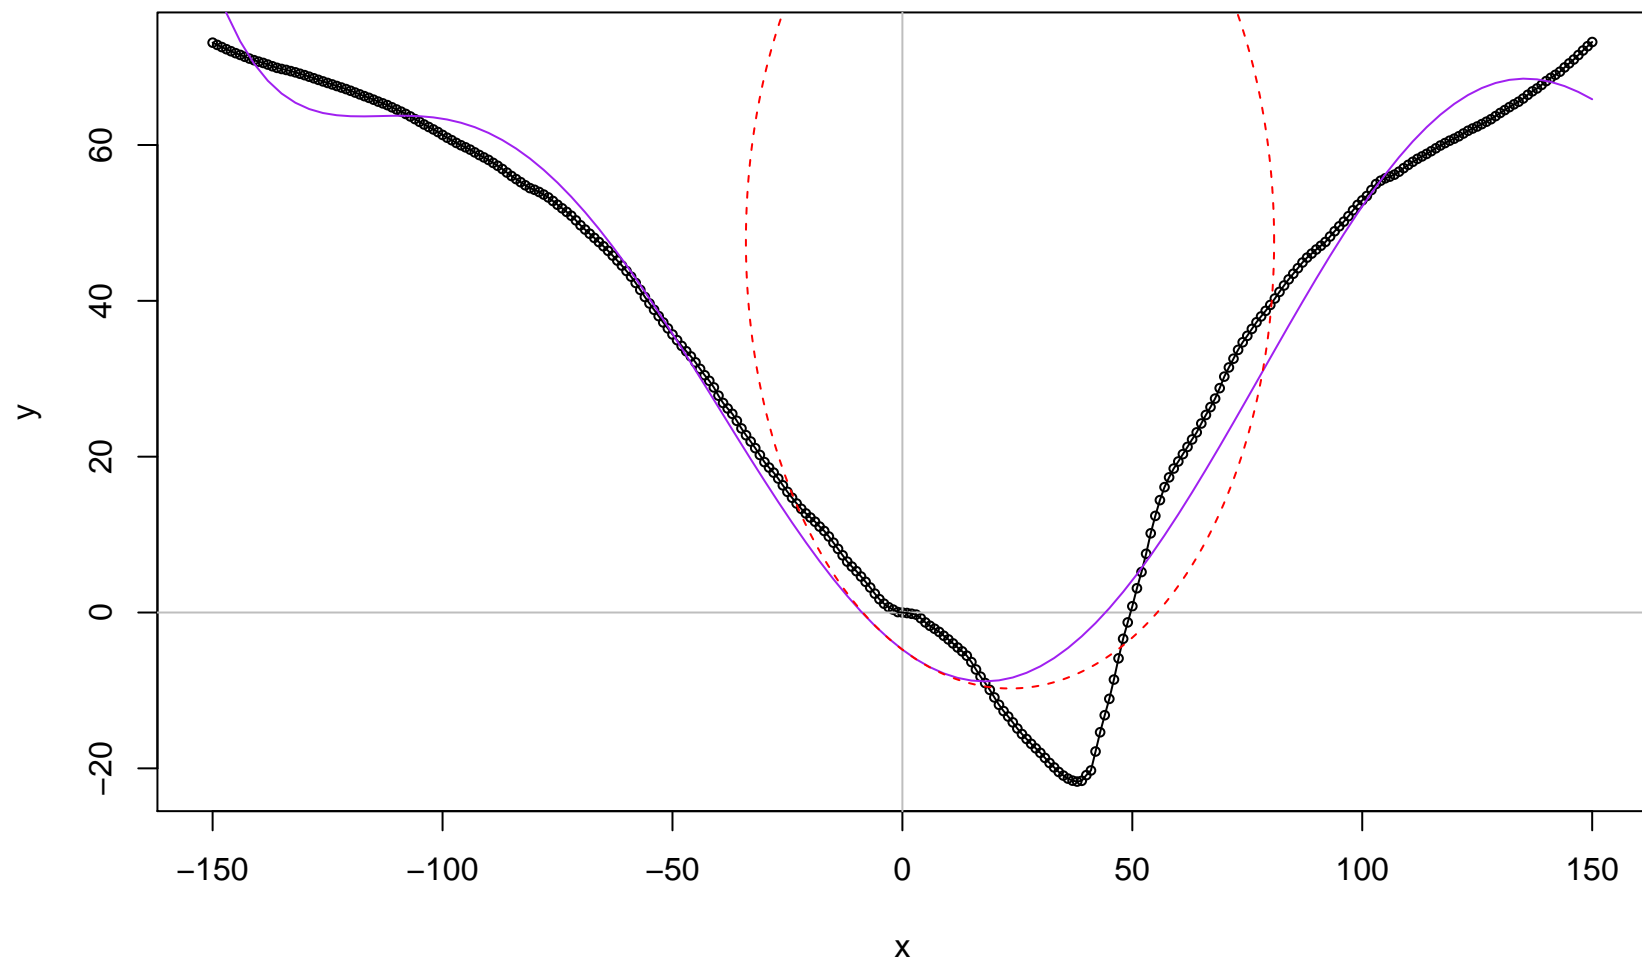

Site 244

$K \cdot 100 = 1.0901$

$R^2 = 0.8099$

radius= 91.7356

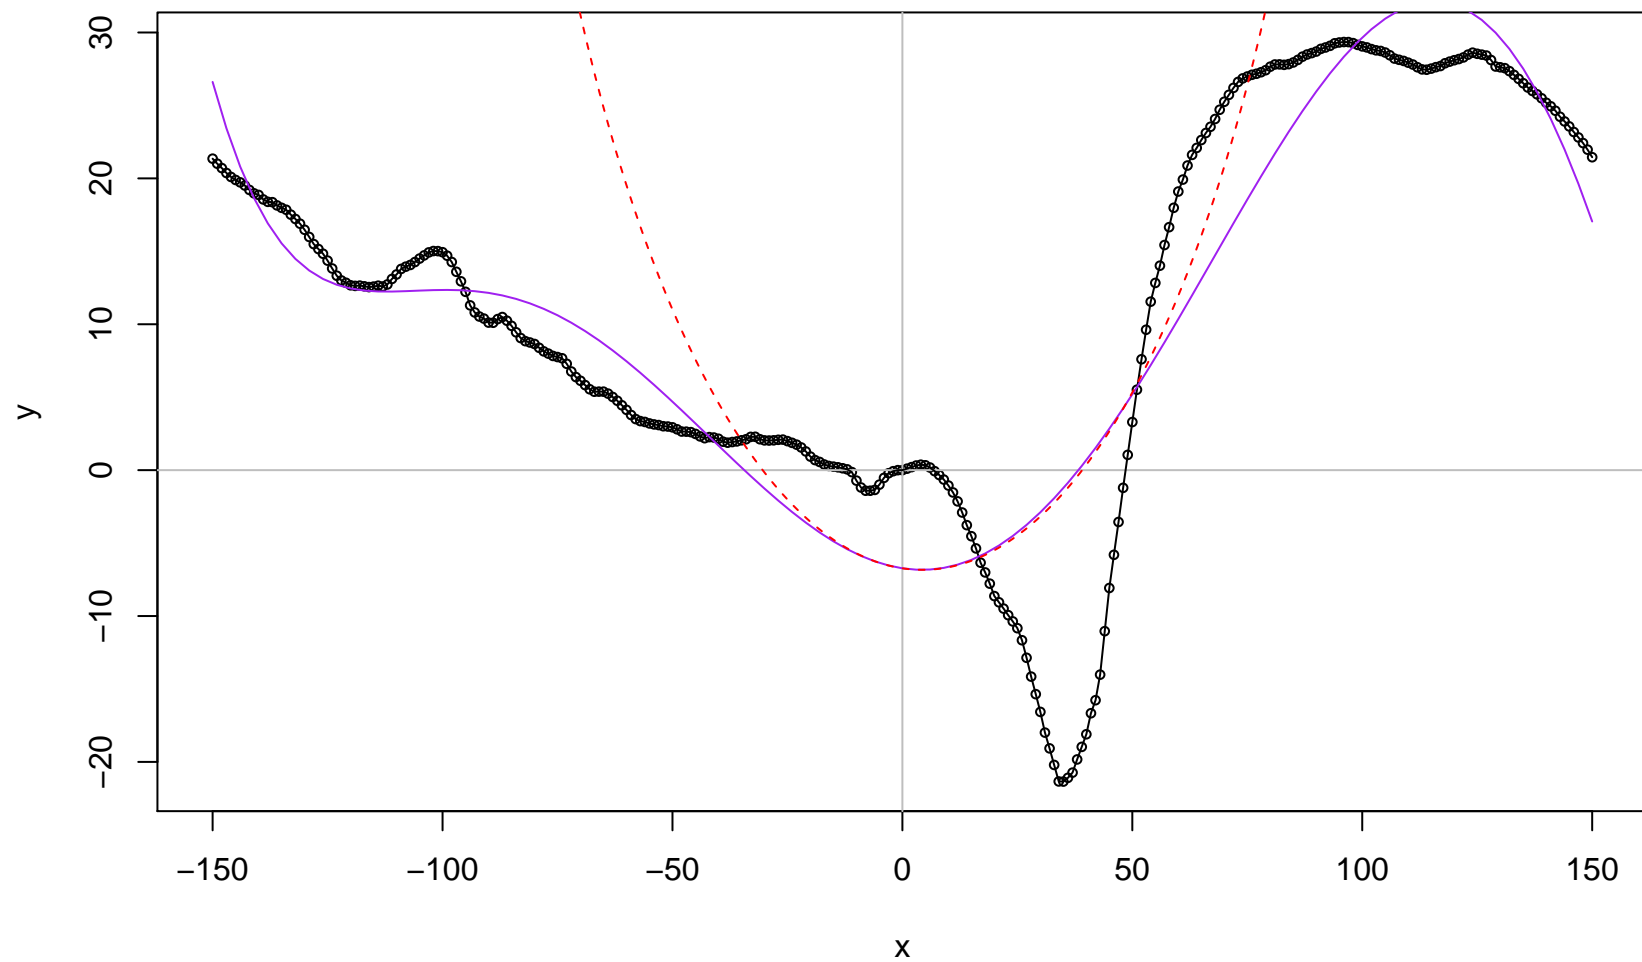

Site 245

$K*100= 0.576$

$R^2= 0.8185$

radius= 173.6029

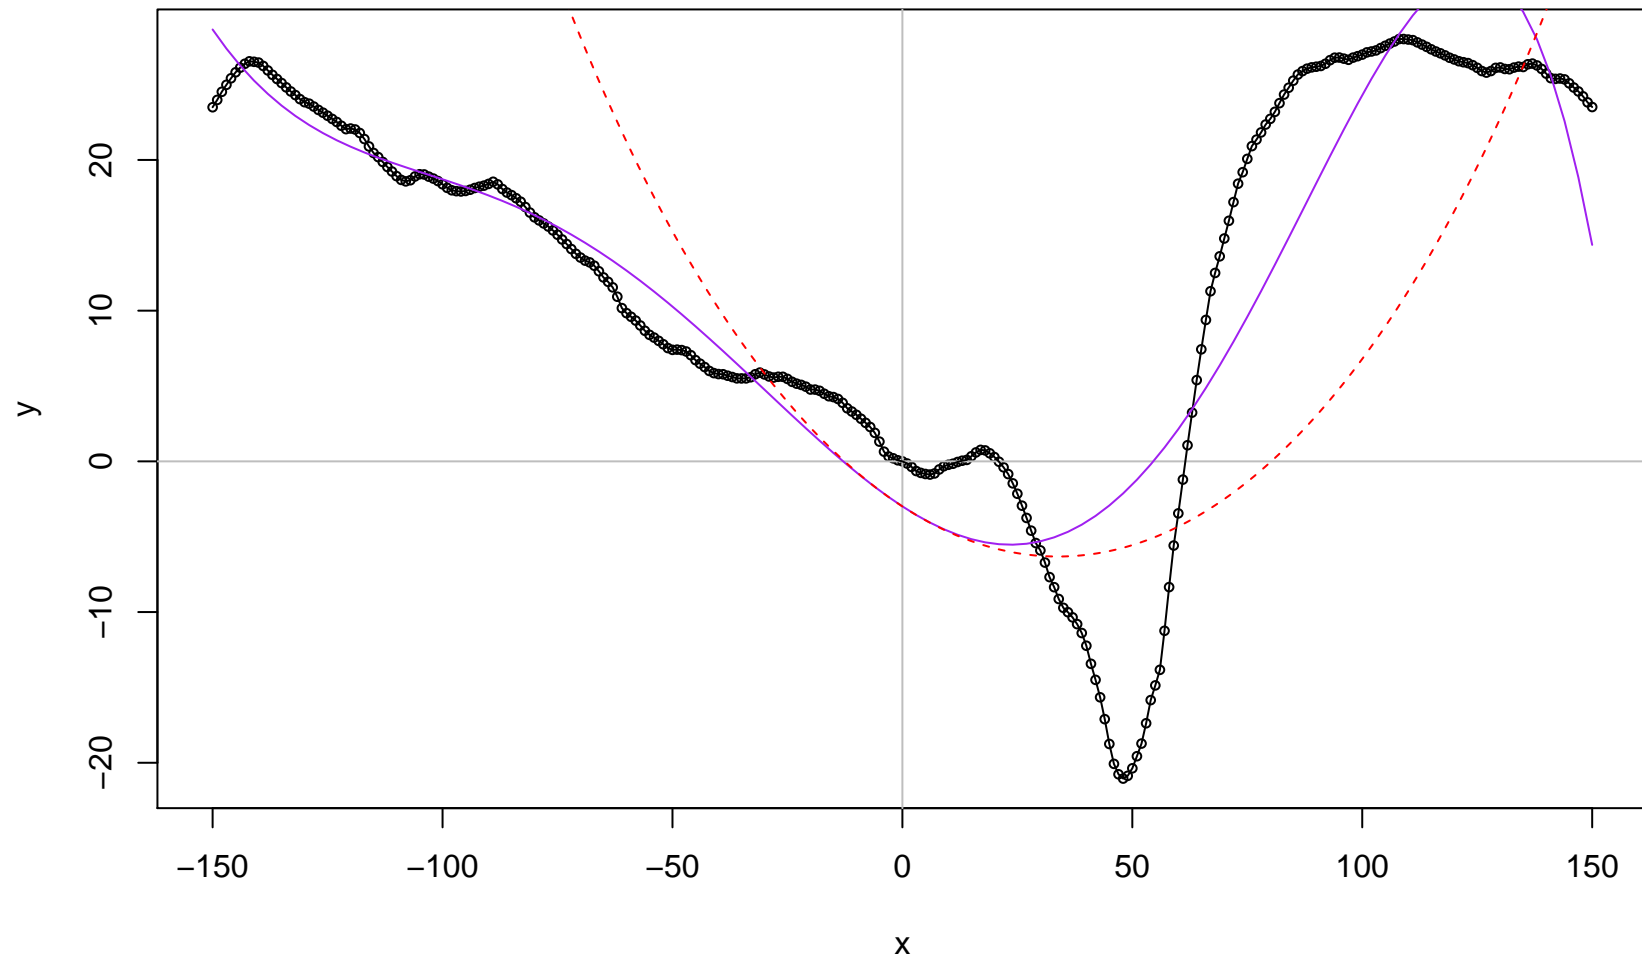

Site 246

$K*100= 0.6608$

$R^2= 0.9307$

radius= 151.3251

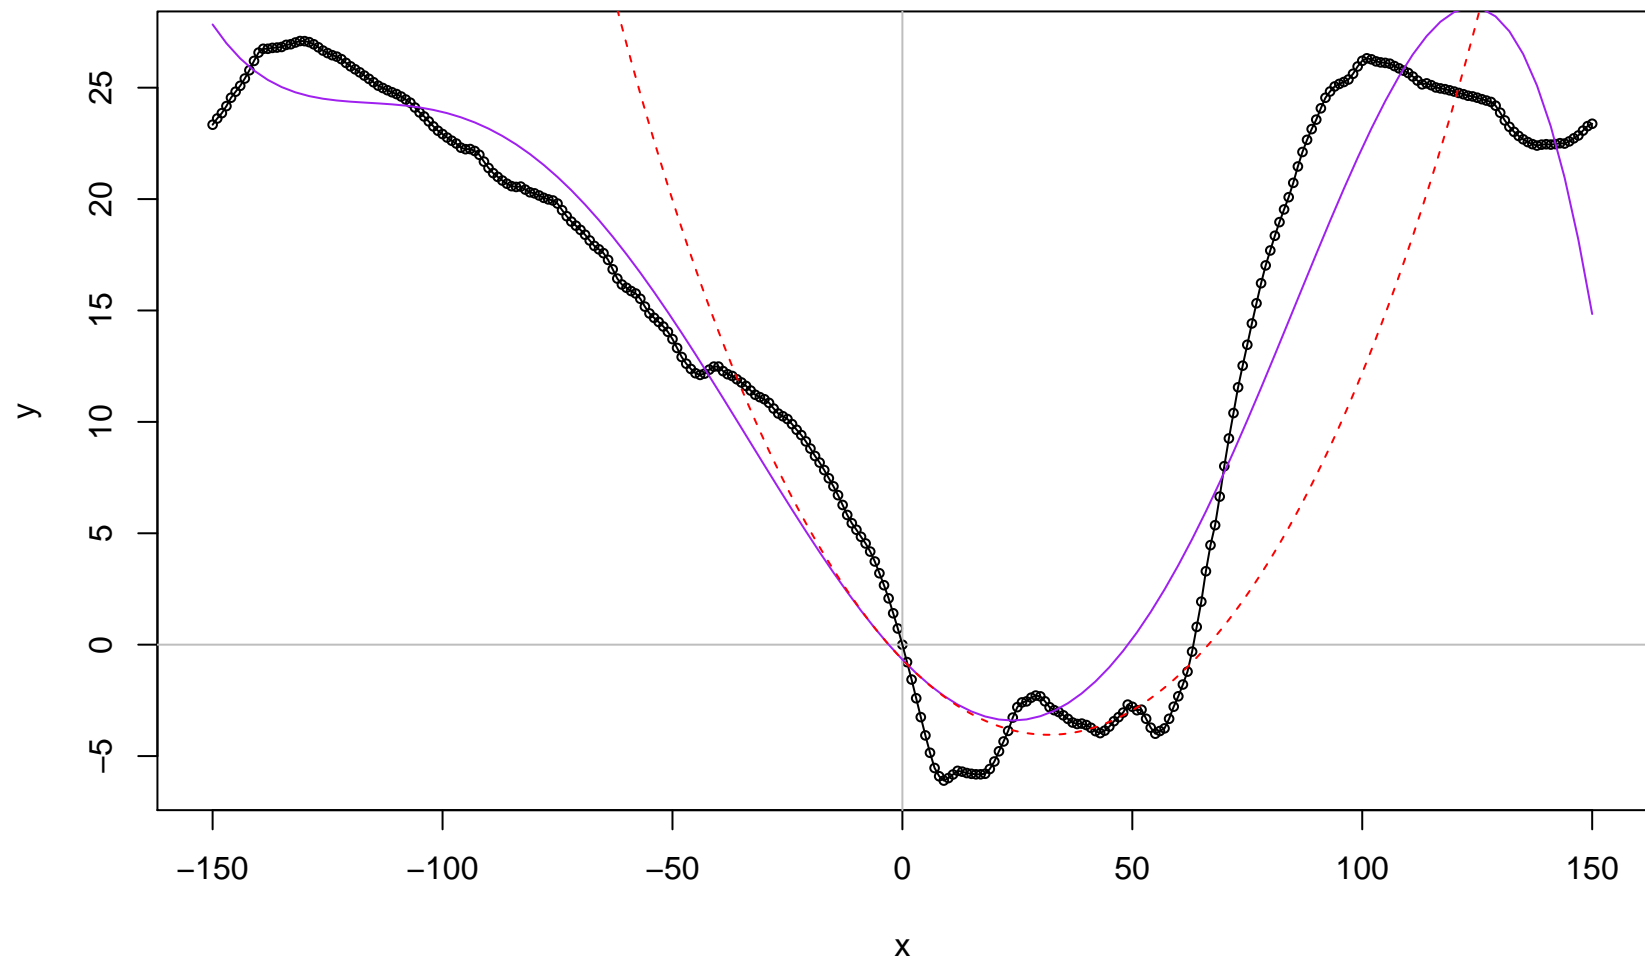

Site 247

$K \cdot 100 = 0.2119$

$R^2 = 0.7807$

radius= 471.9265

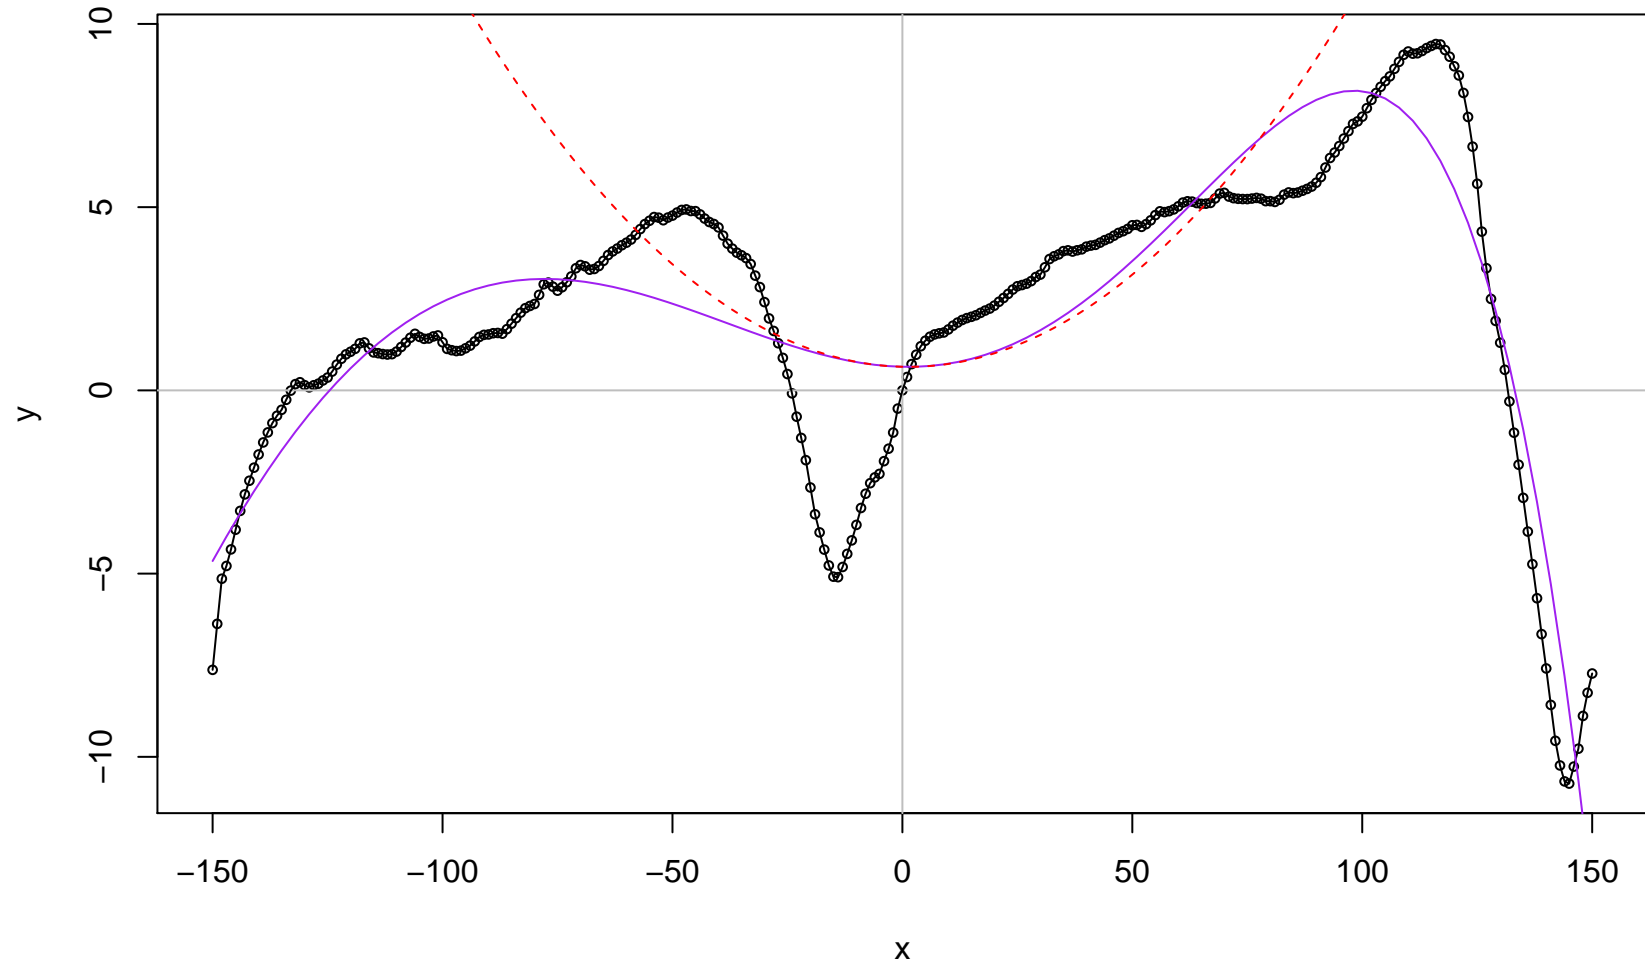

Site 248

$K \cdot 100 = 0.1022$

$R^2 = 0.7073$

radius= 978.2561

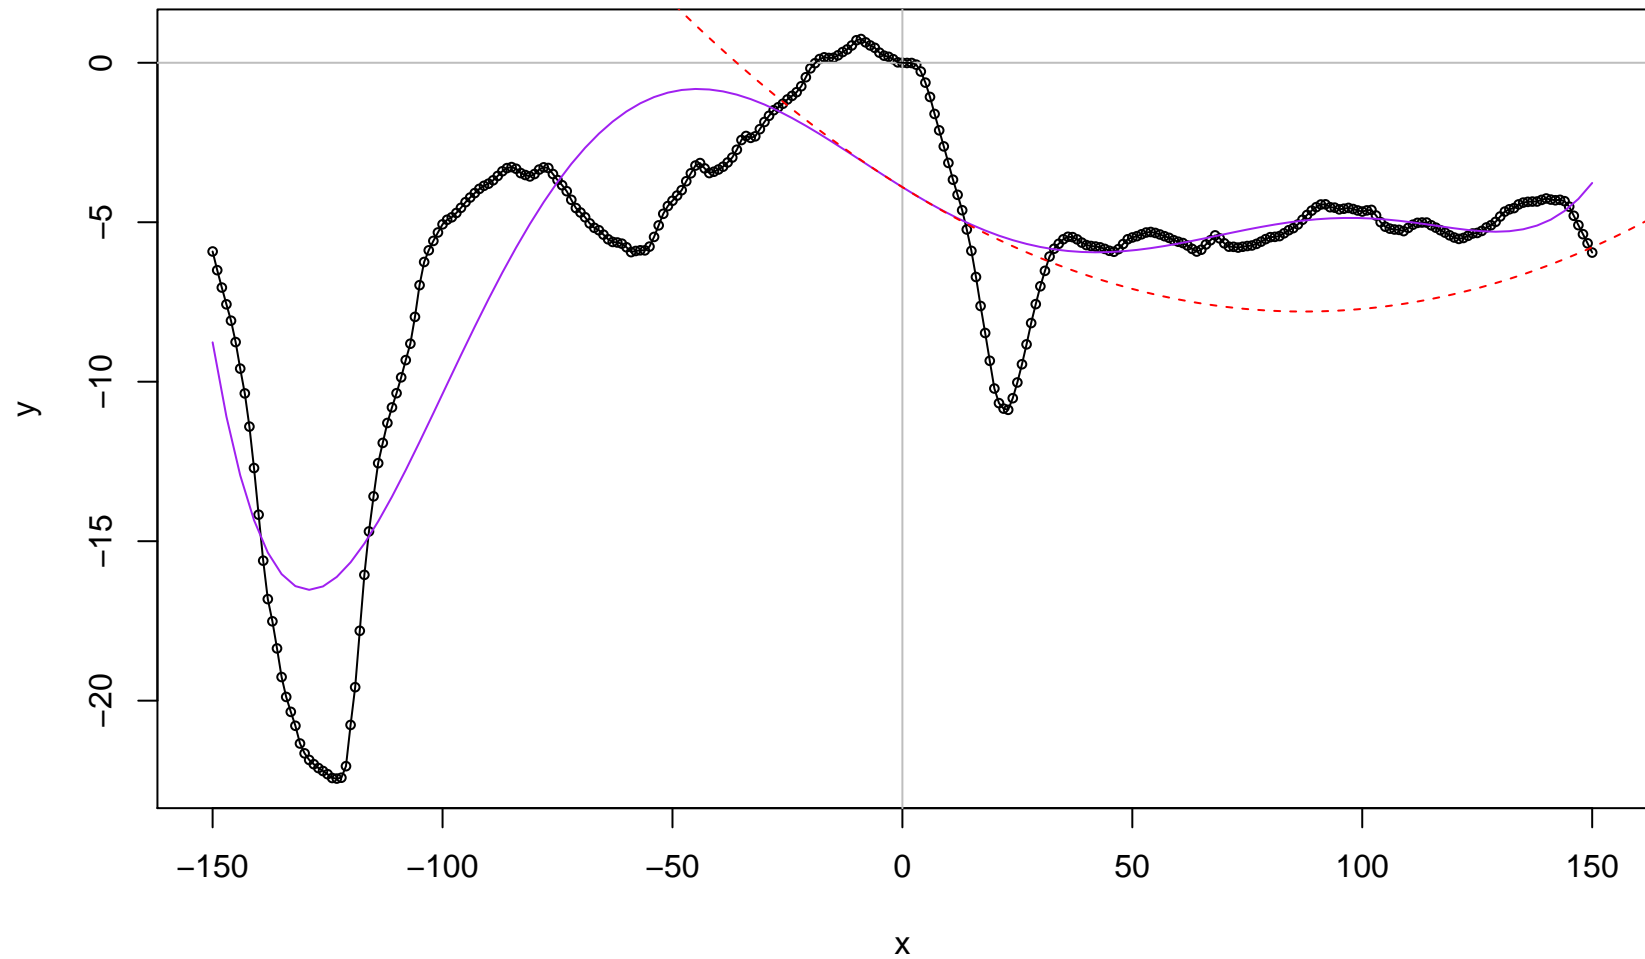



Site 249

$K*100= 0.5342$

$R^2= 0.9628$

radius= 187.2109

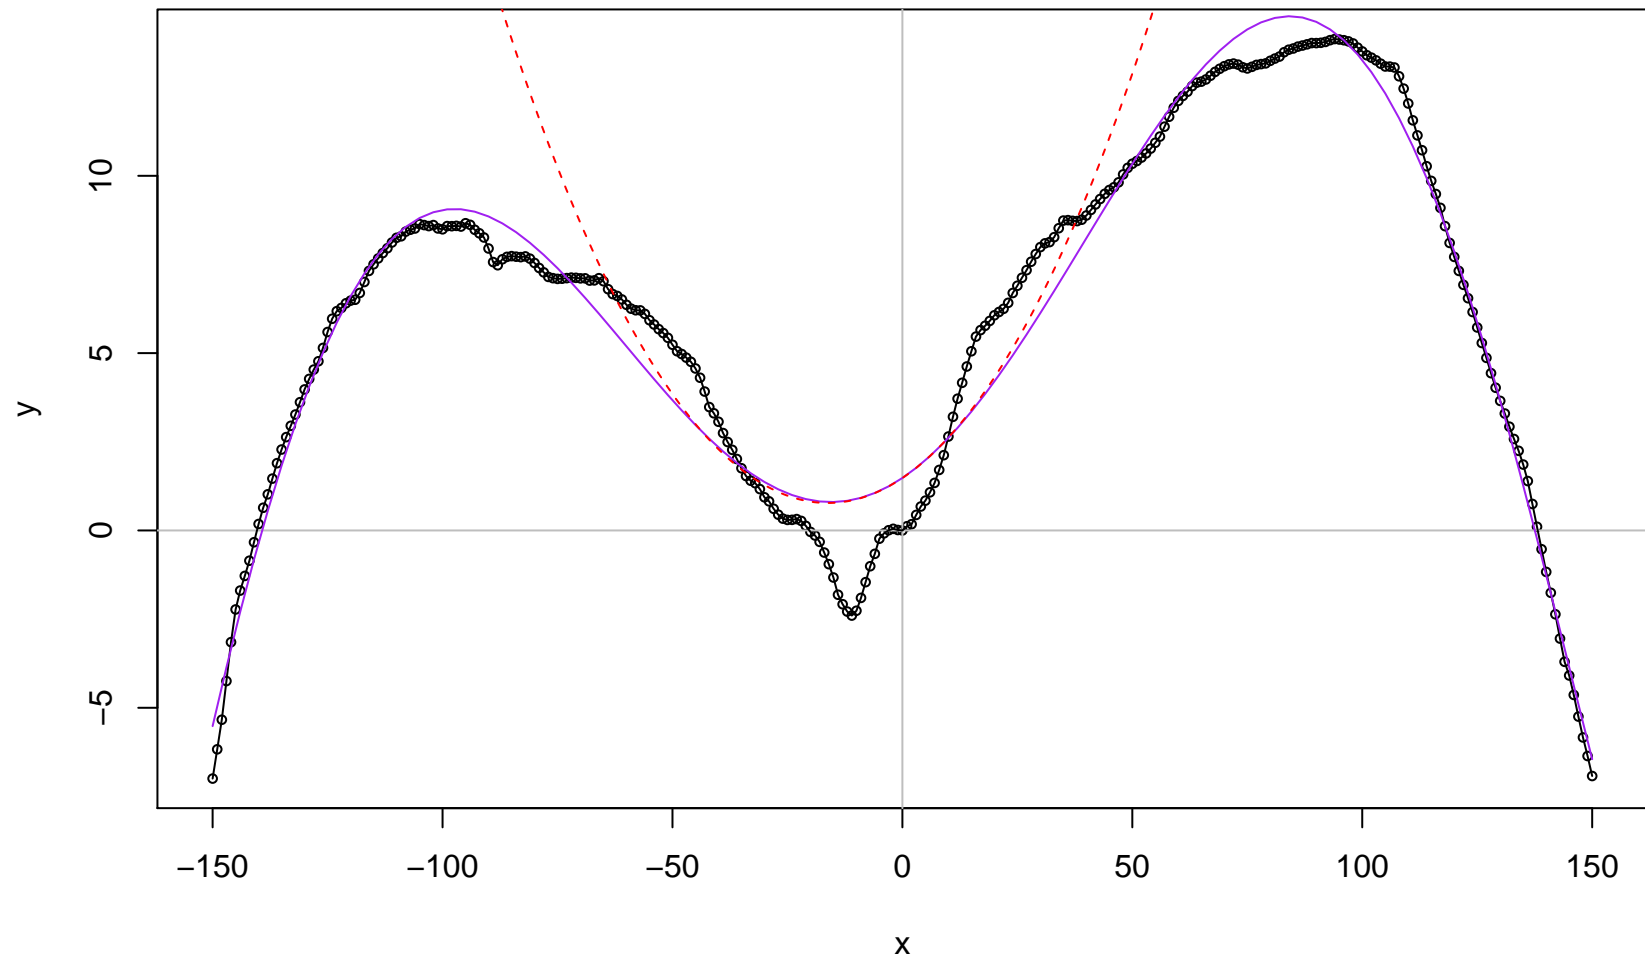

Site 250

$K \cdot 100 = 0.4128$

$R^2 = 0.9726$

radius= 242.2302

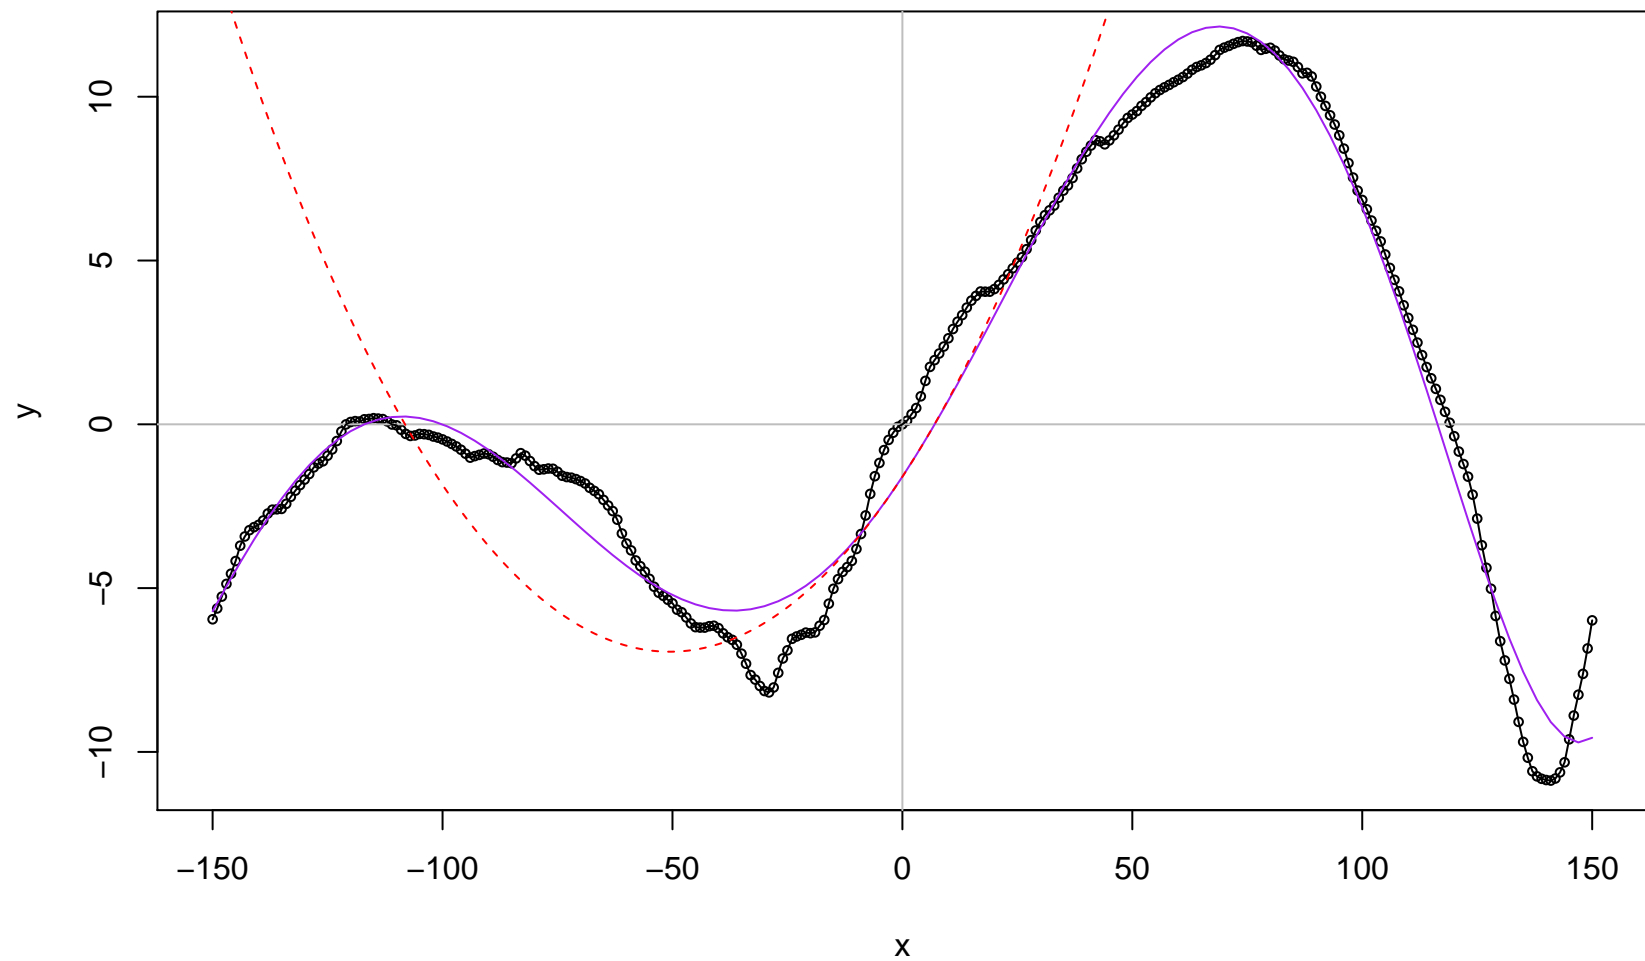

Site 251

$K \cdot 100 = 0.2735$

$R^2 = 0.9566$

radius= 365.6488

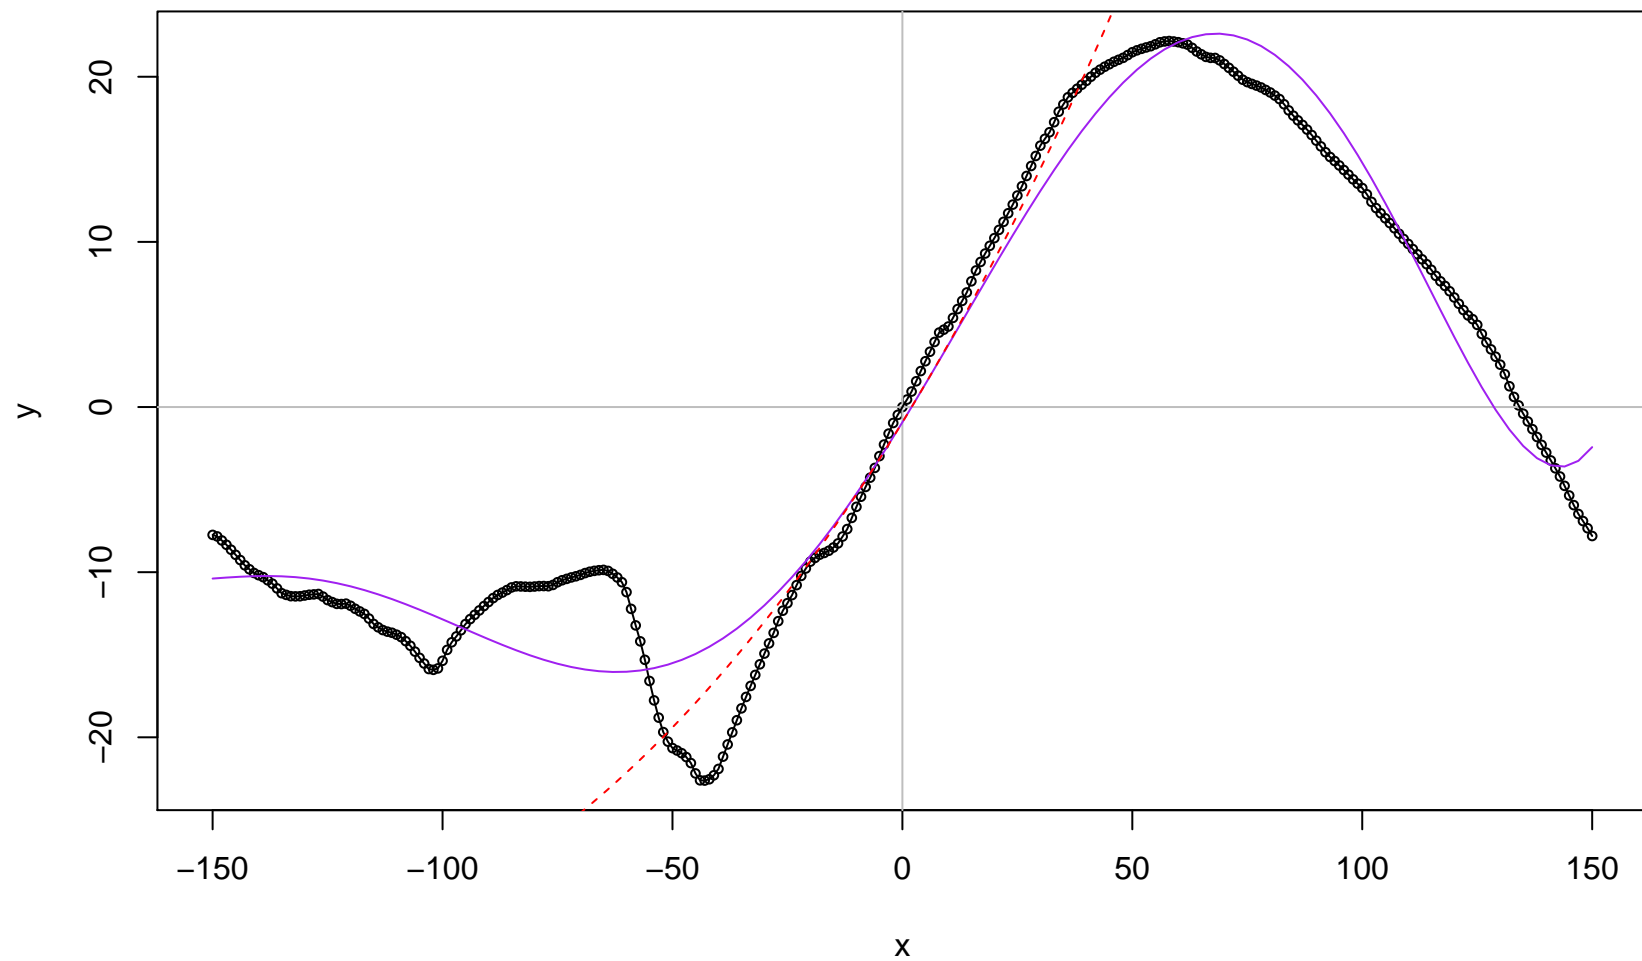

Site 252

$K \cdot 100 = -1.1371$

$R^2 = 0.985$

radius =  $-87.9459$

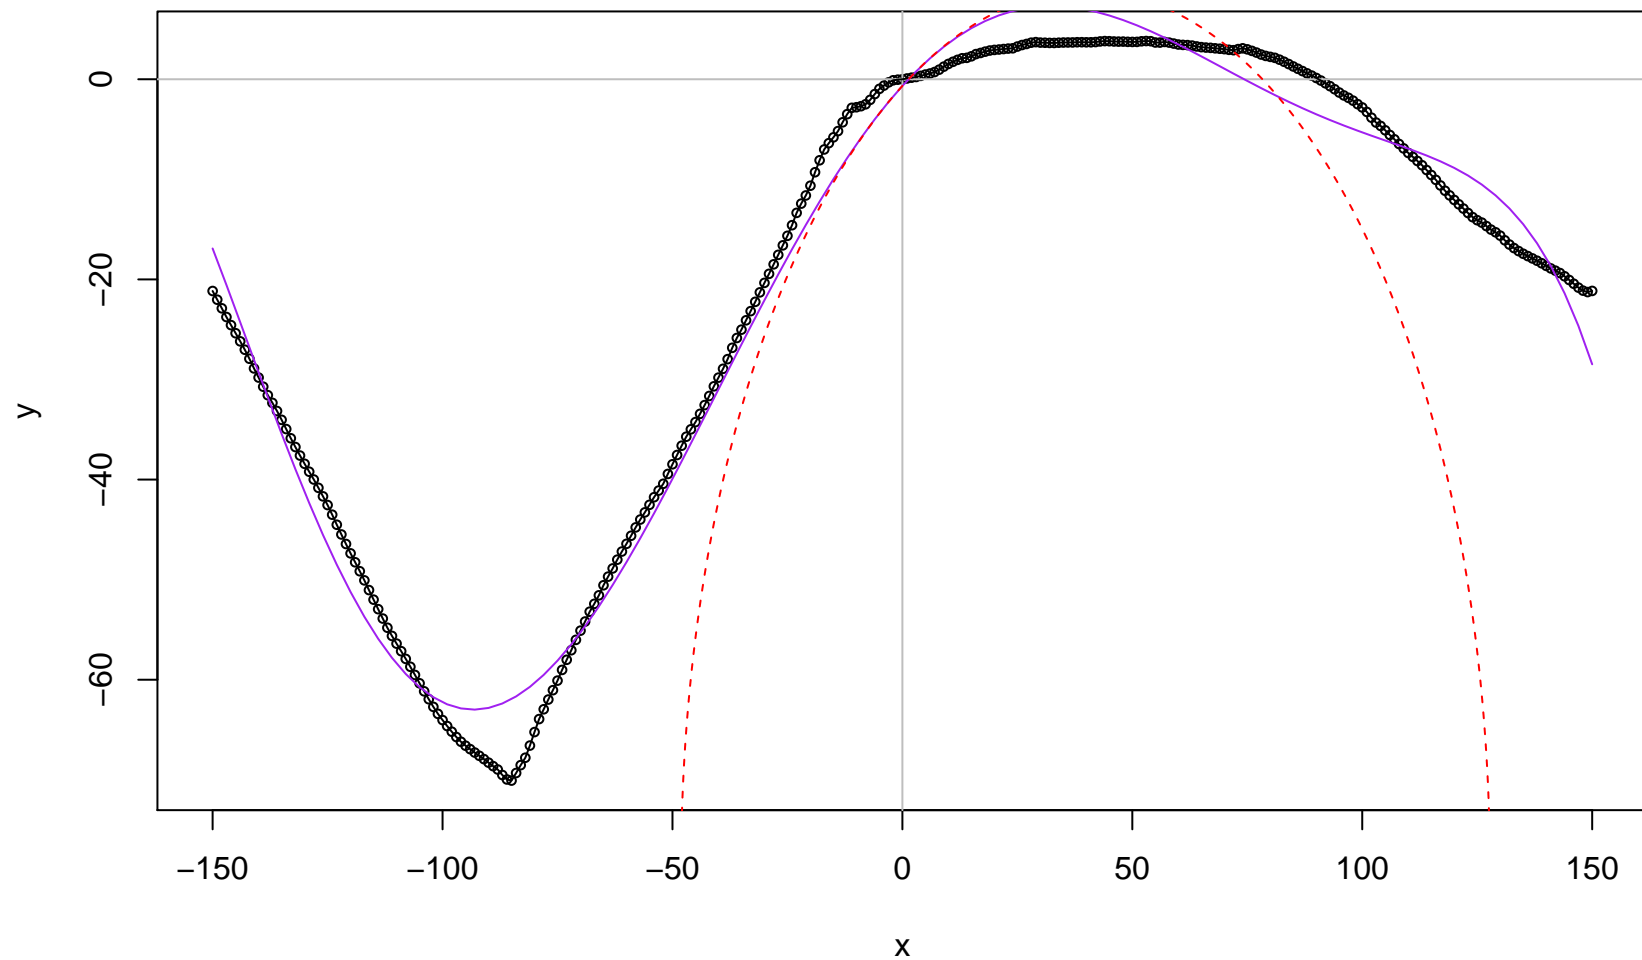

Site 253

$K \cdot 100 = 1.1224$

$R^2 = 0.9375$

radius= 89.0938

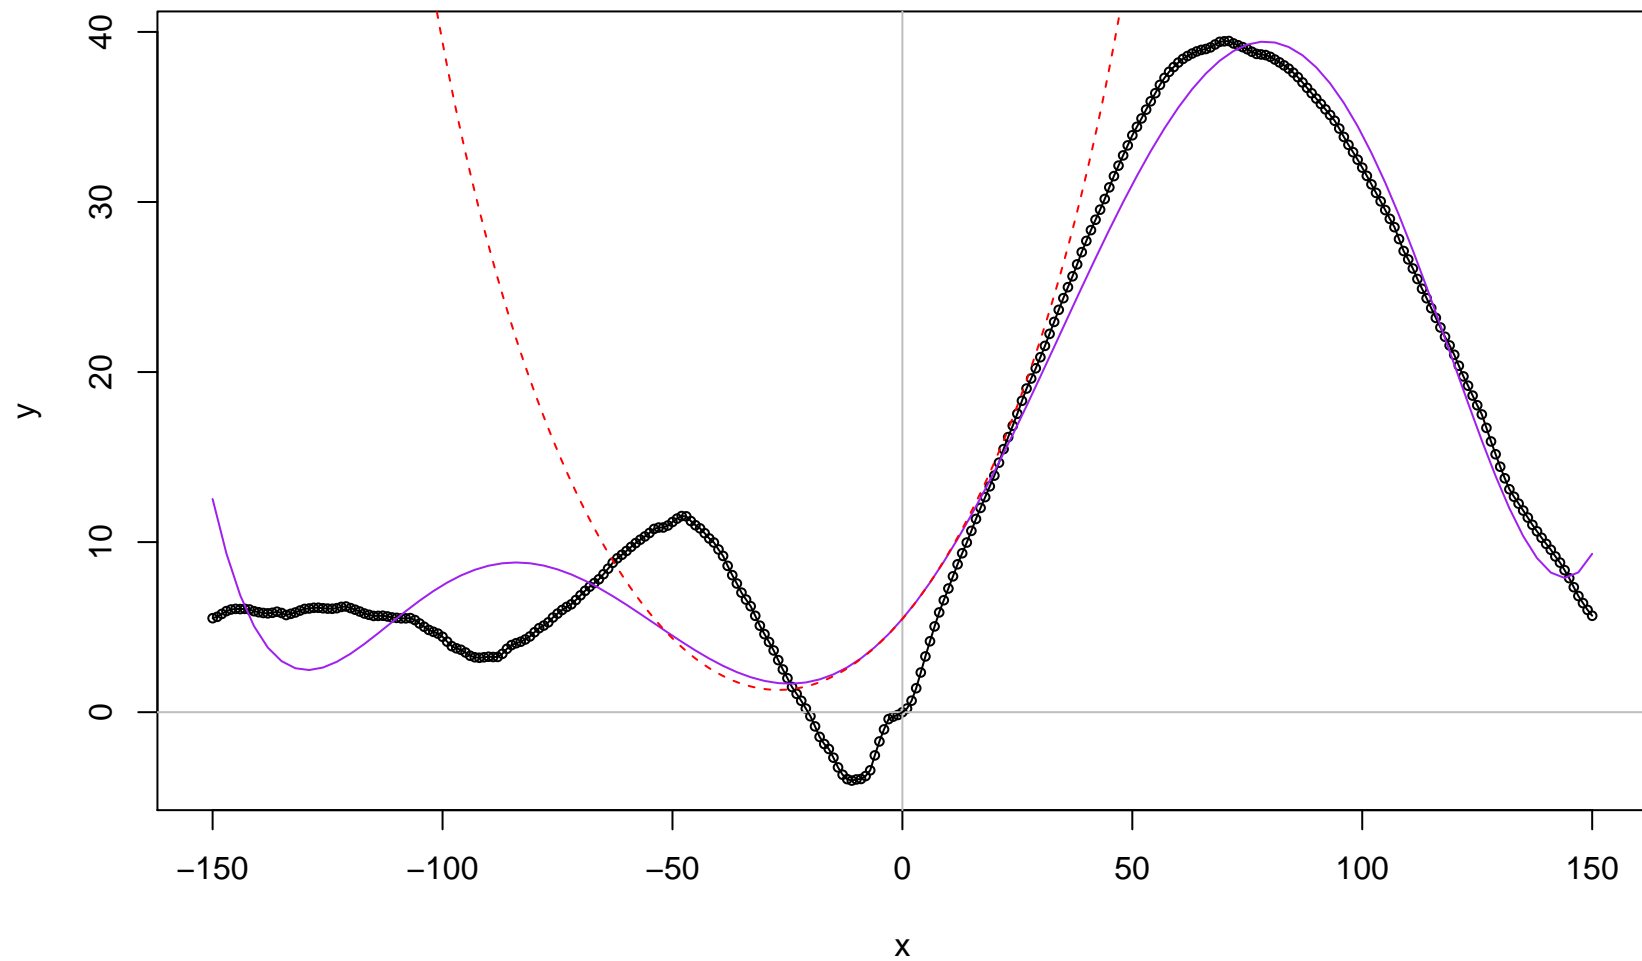

Site 254

$K*100 = -1.3769$

$R^2 = 0.9849$

radius =  $-72.6275$

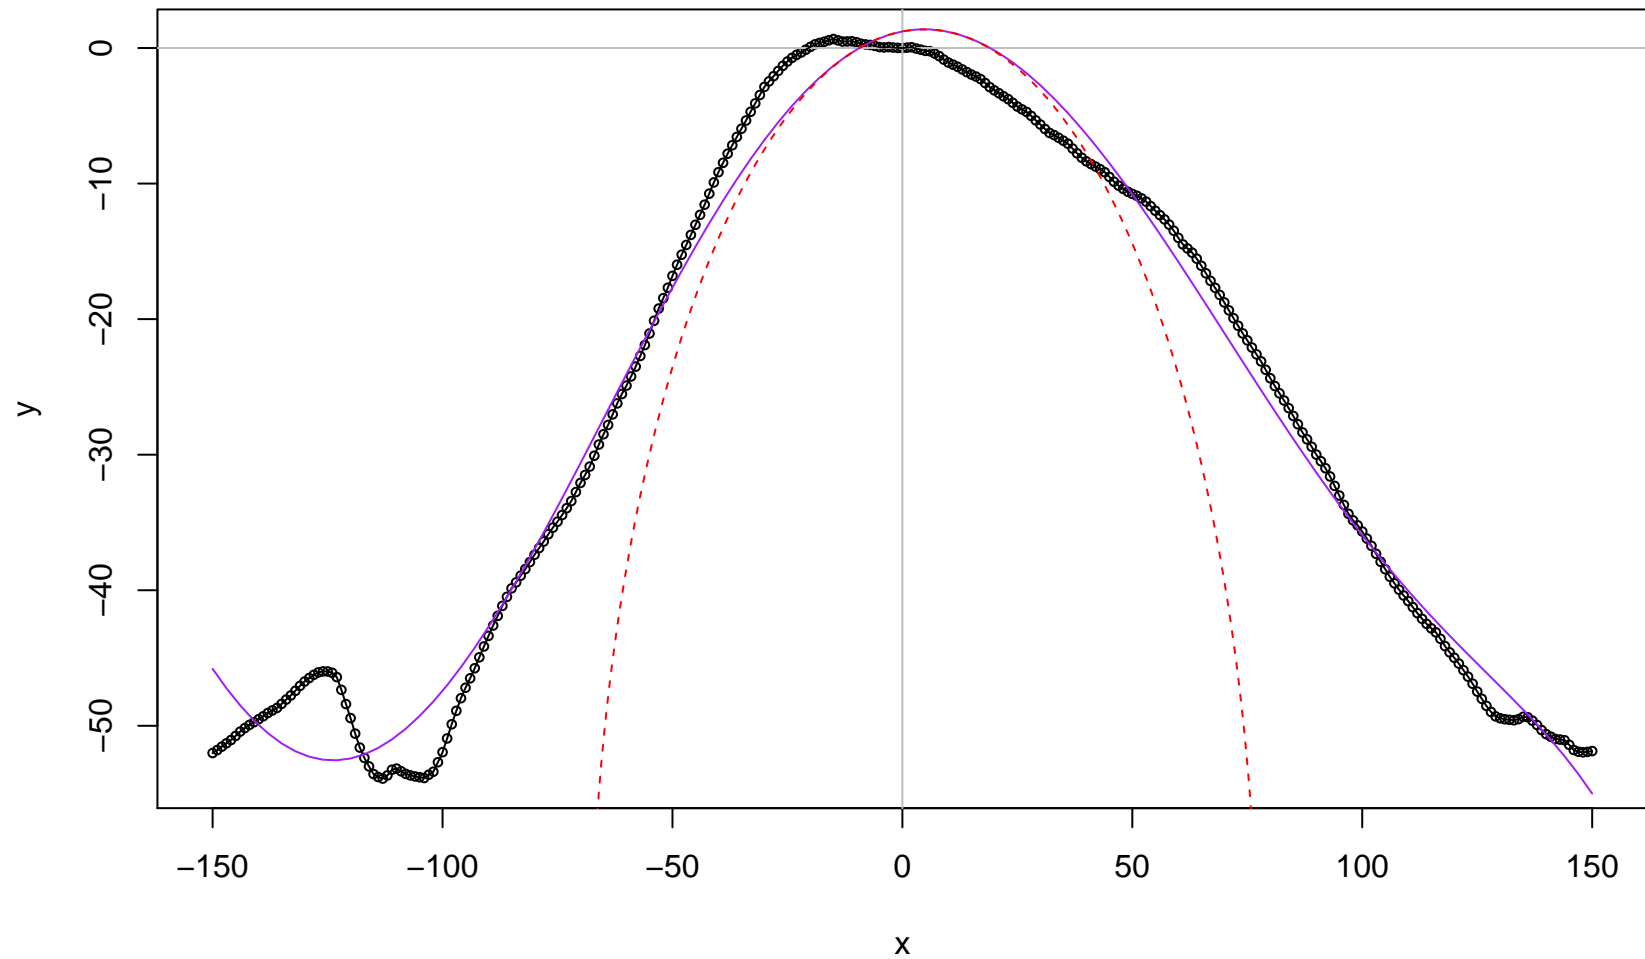

Site 255

$K \cdot 100 = 1.0504$

$R^2 = 0.9546$

radius= 95.1997

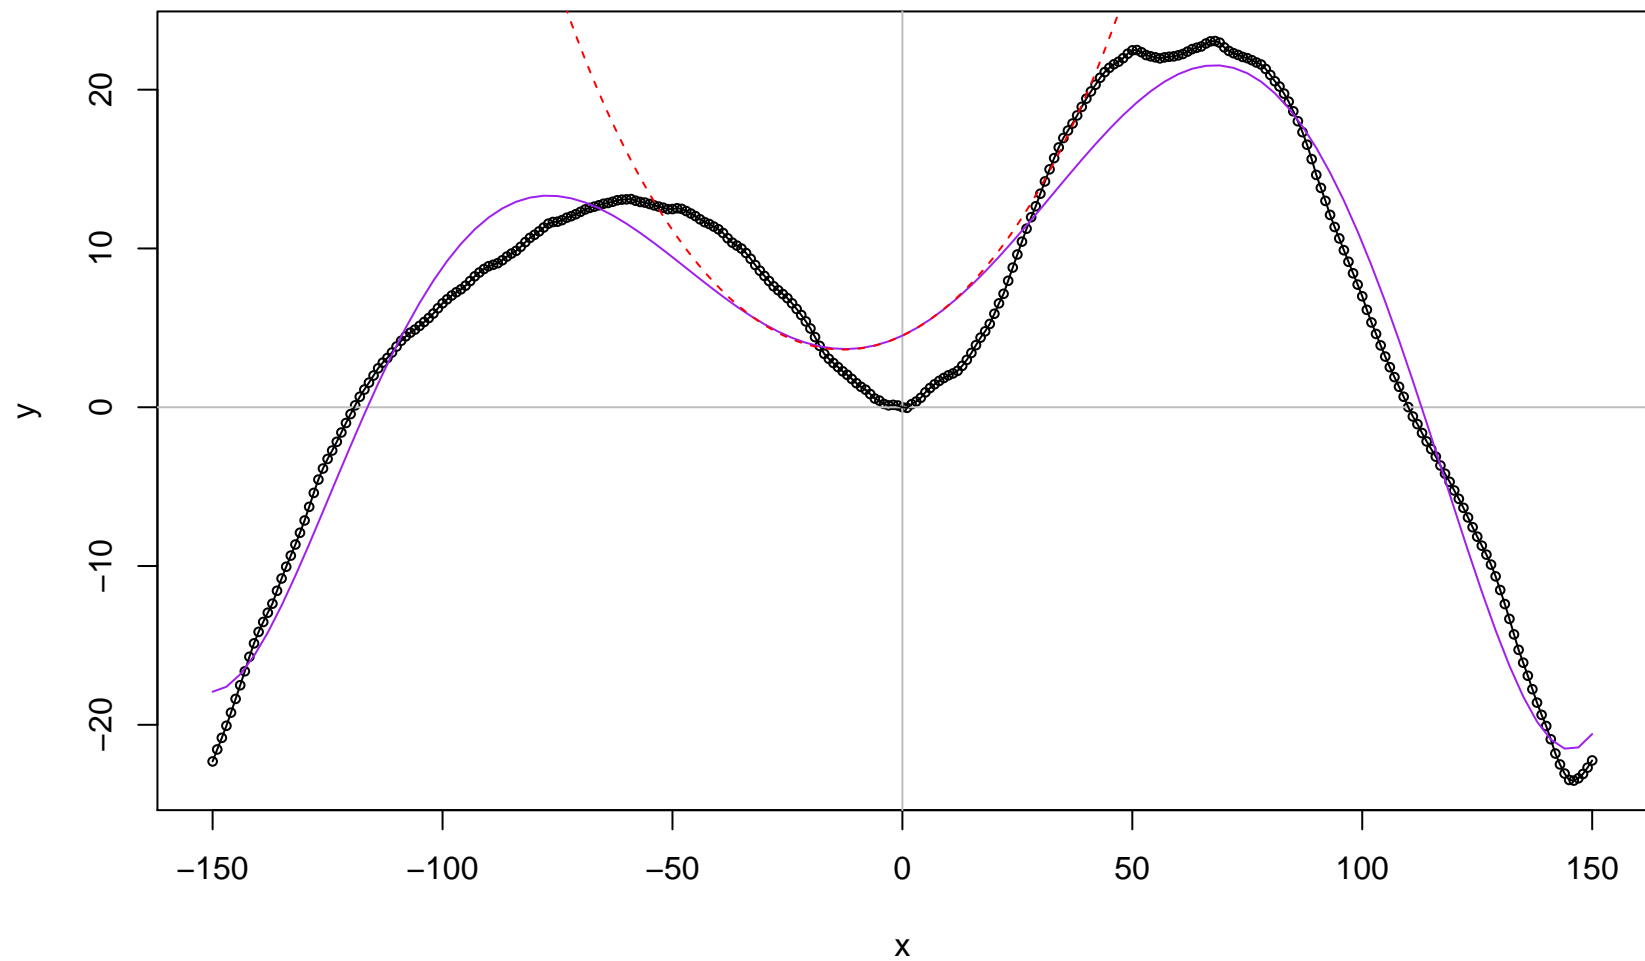

Site 256

$K \cdot 100 = 0.5767$

$R^2 = 0.9745$

radius = 173.392

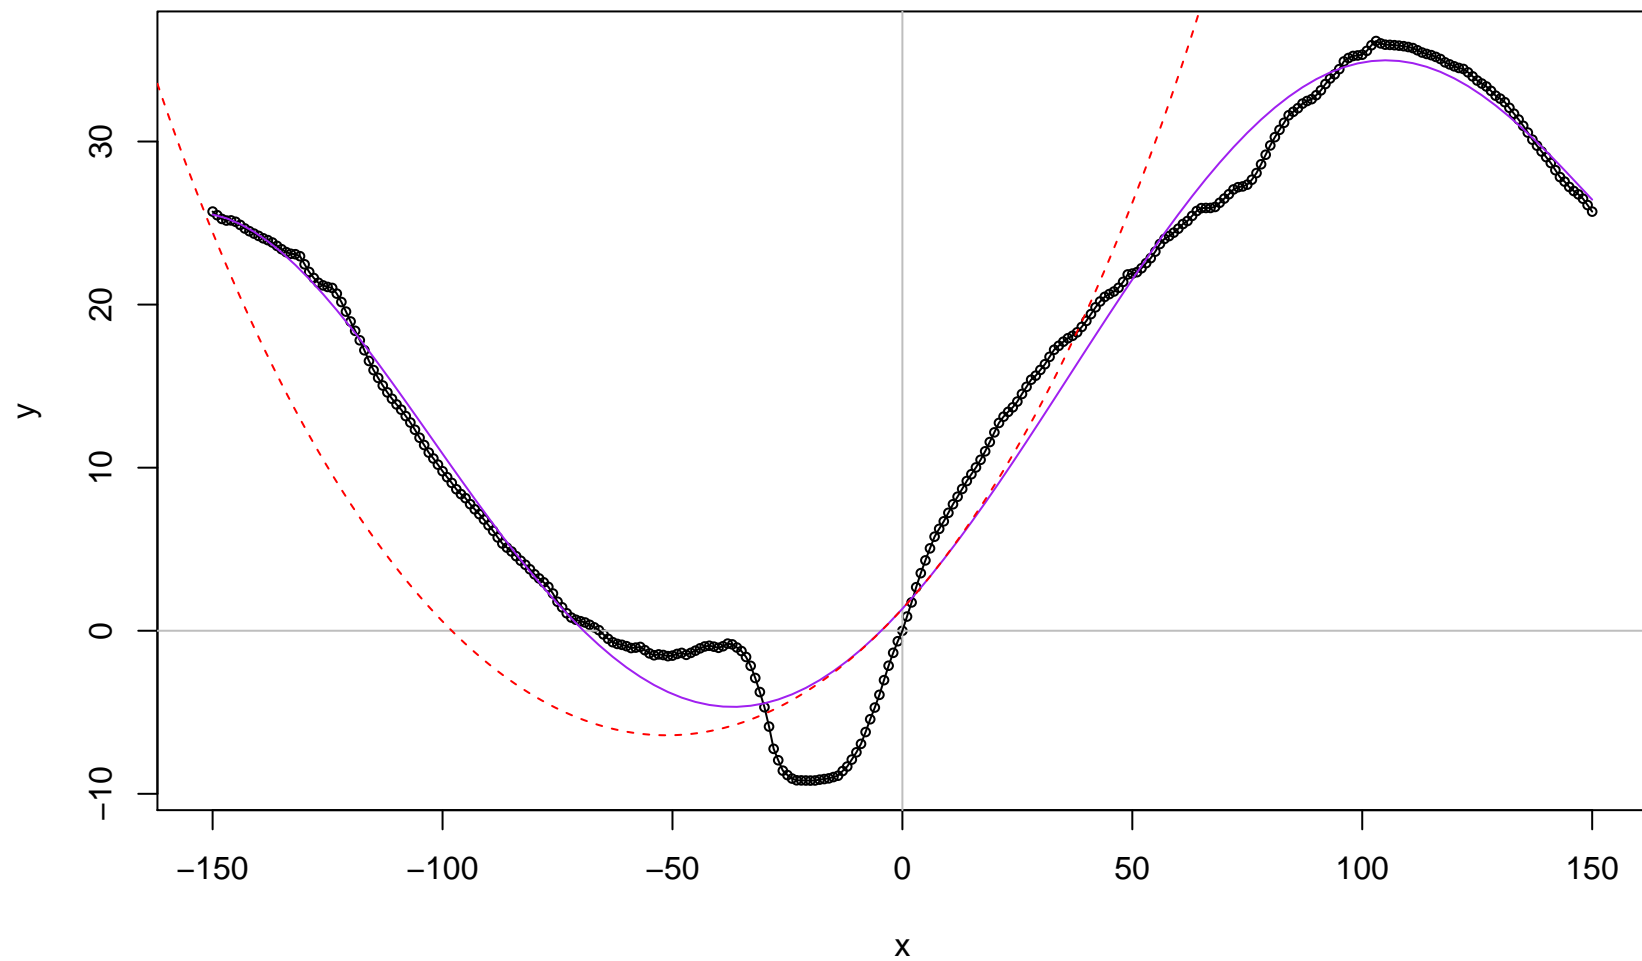



Site 257

$K \cdot 100 = 0.4572$

$R^2 = 0.931$

radius= 218.7232

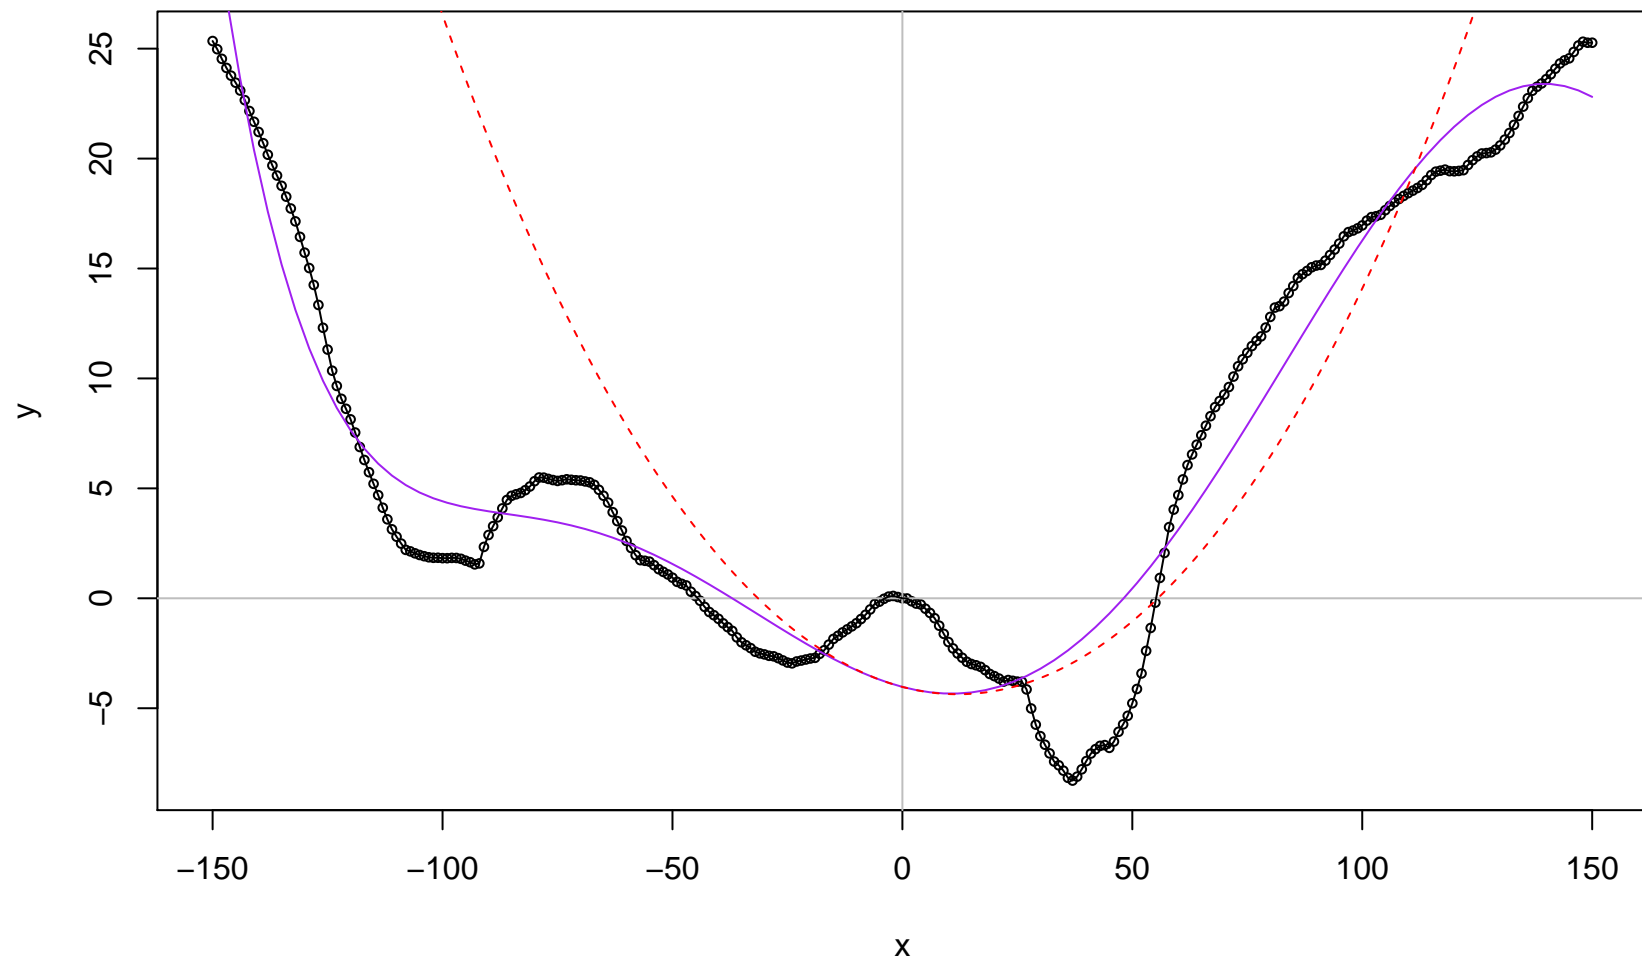

Site 258

$K*100= 0.7179$

$R^2= 0.983$

radius= 139.2891

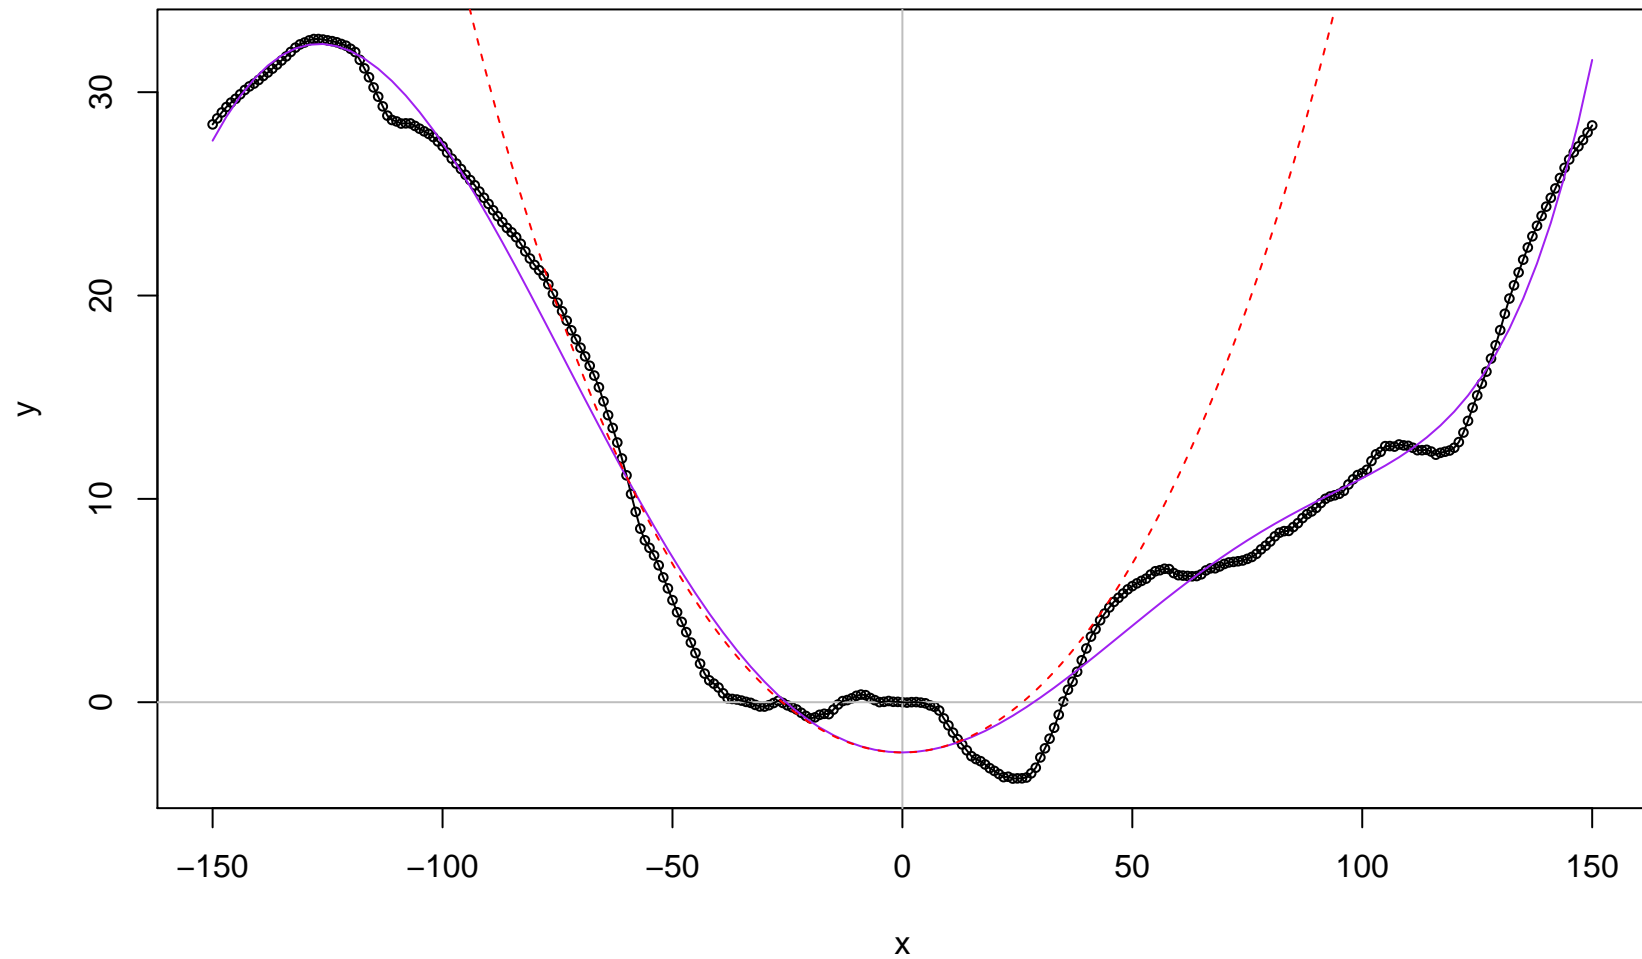

Site 259

$K*100= 0.789$

$R^2= 0.8965$

radius= 126.7496

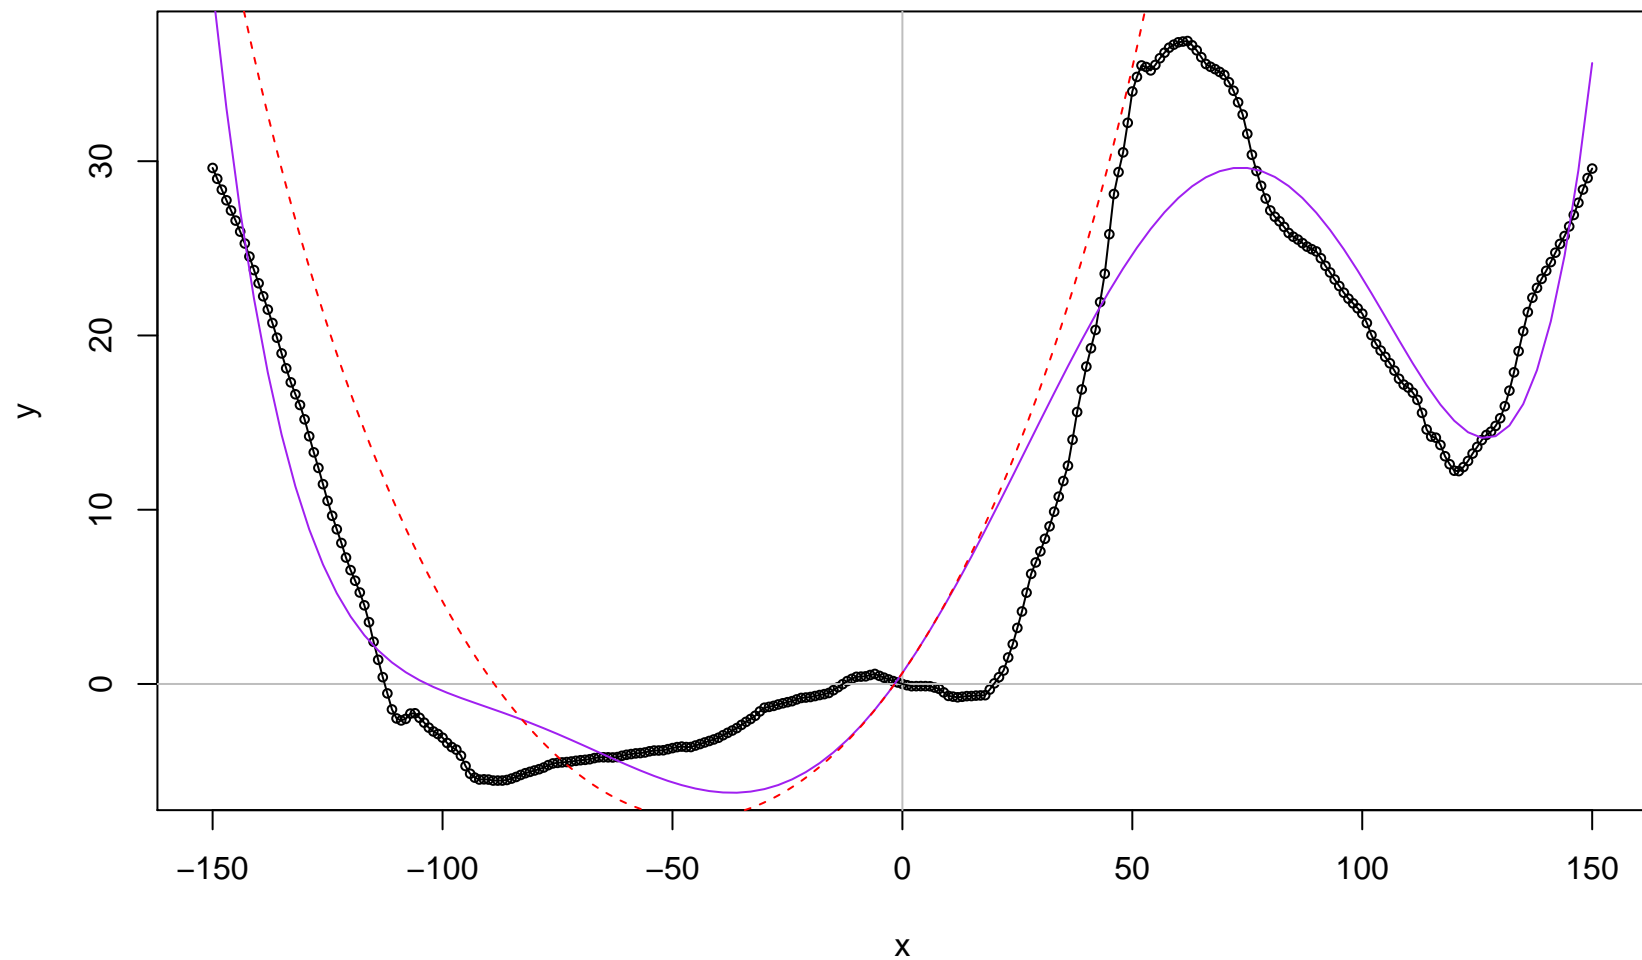

Site 260

$K*100= 1.0162$

$R^2= 0.9854$

radius= 98.4045

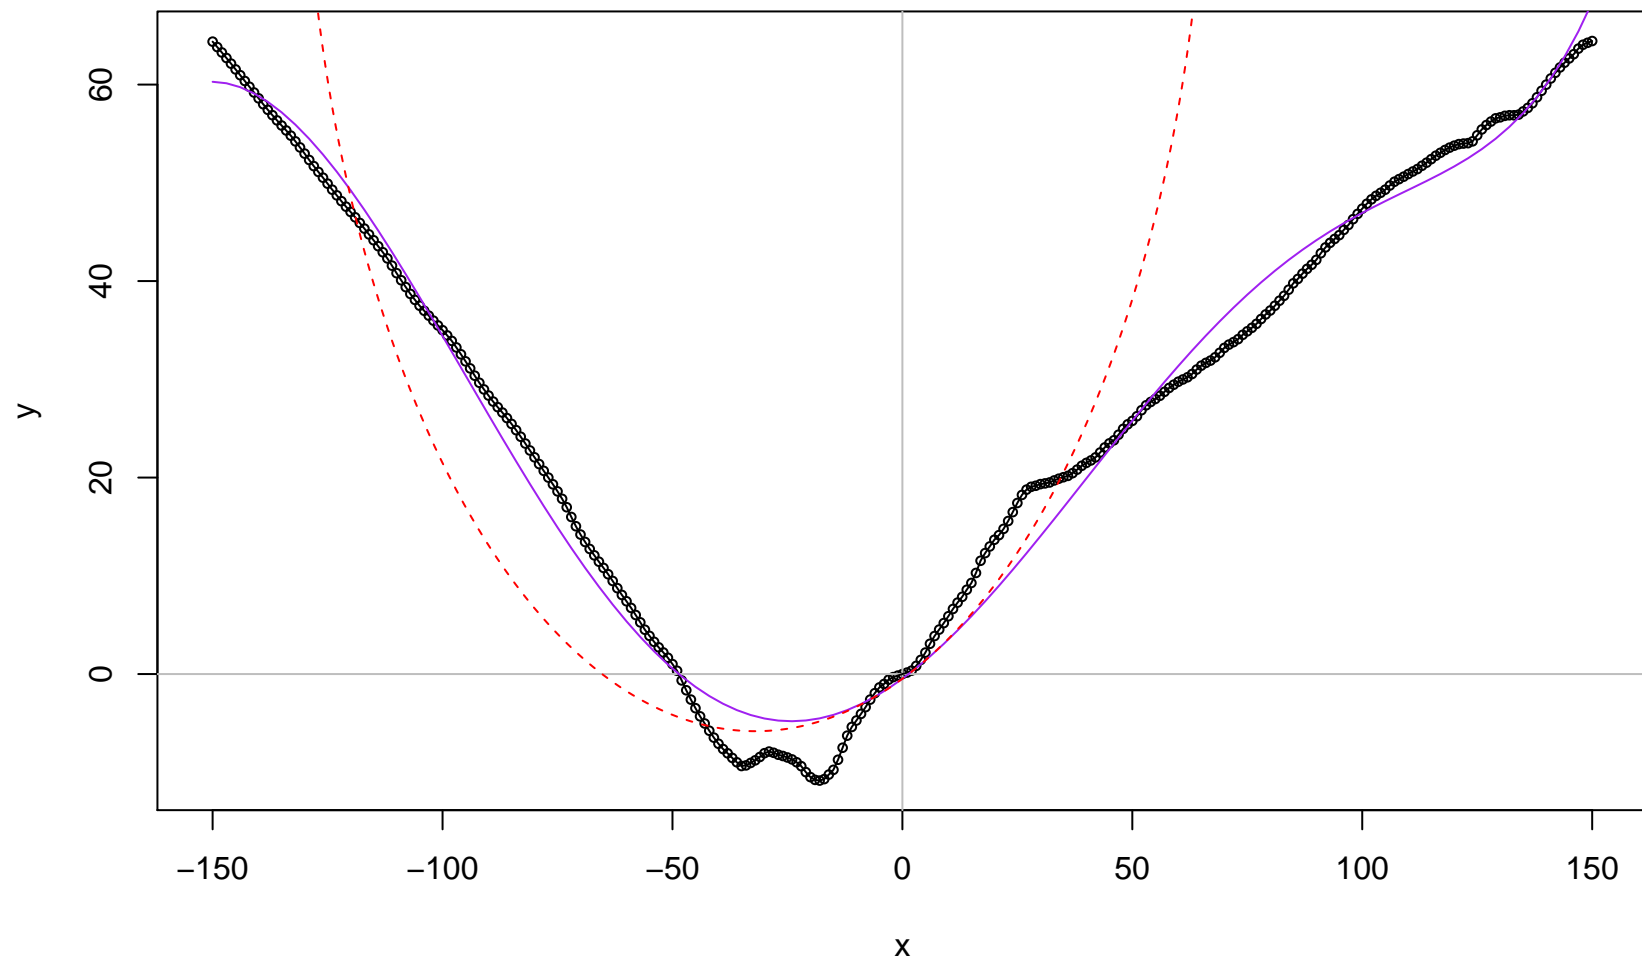

Site 261

$K*100= 0.1563$

$R^2= 0.9708$

radius= 639.8848

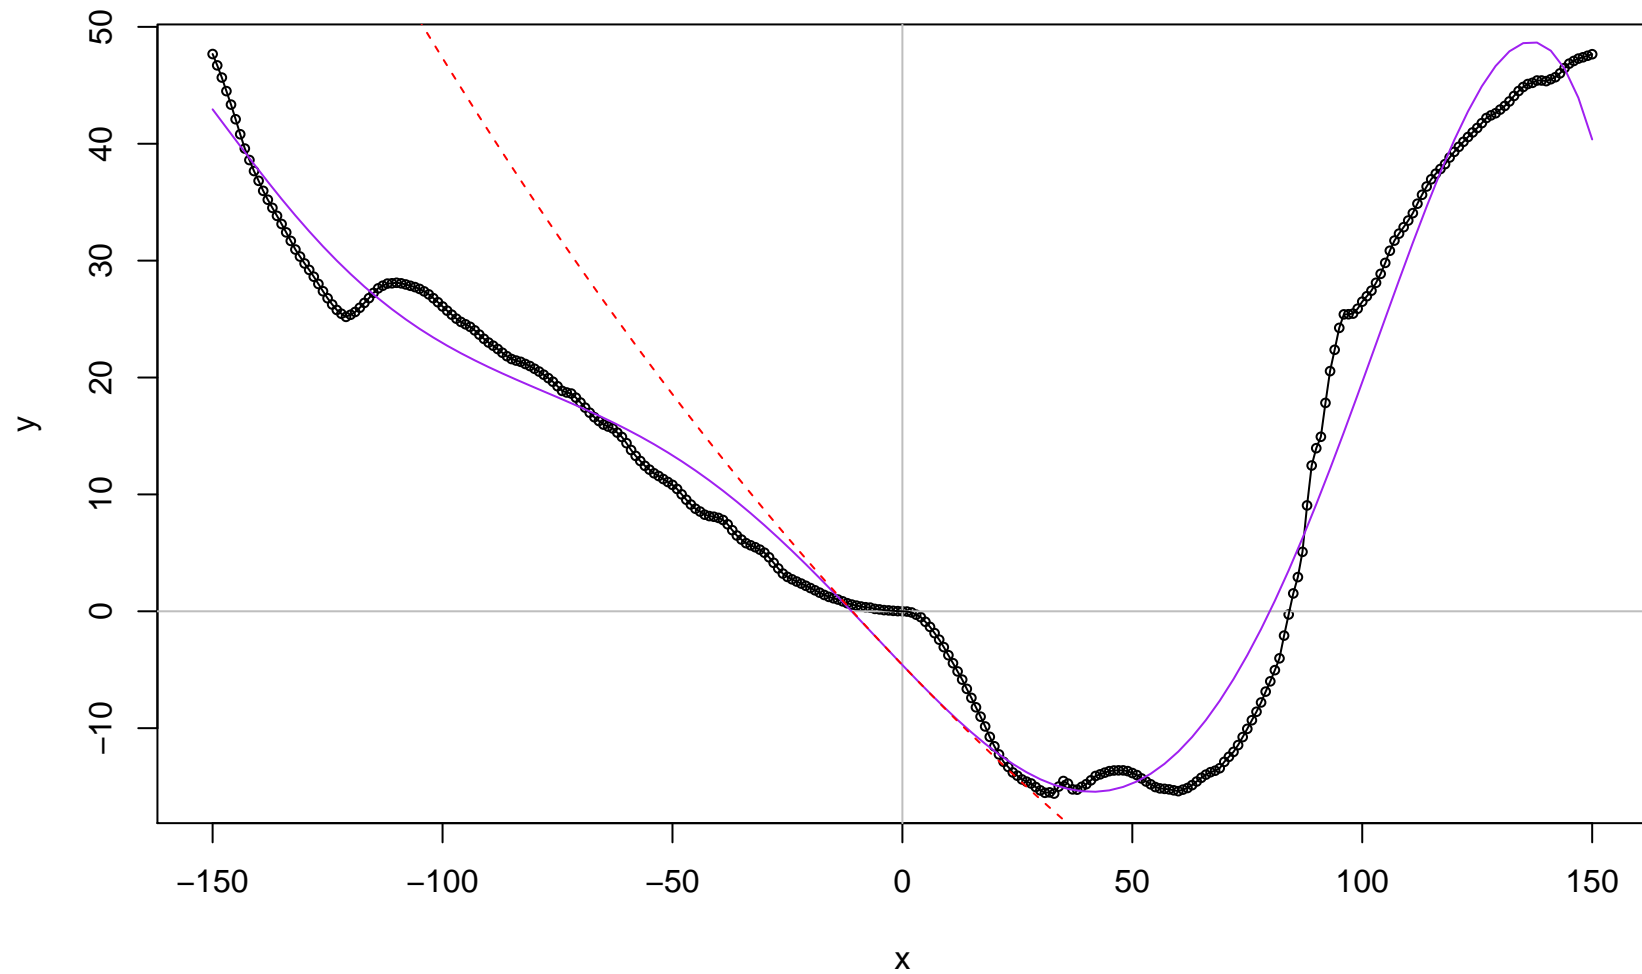

Site 262

$K*100= 0.8708$

$R2= 0.7209$

radius= 114.8315

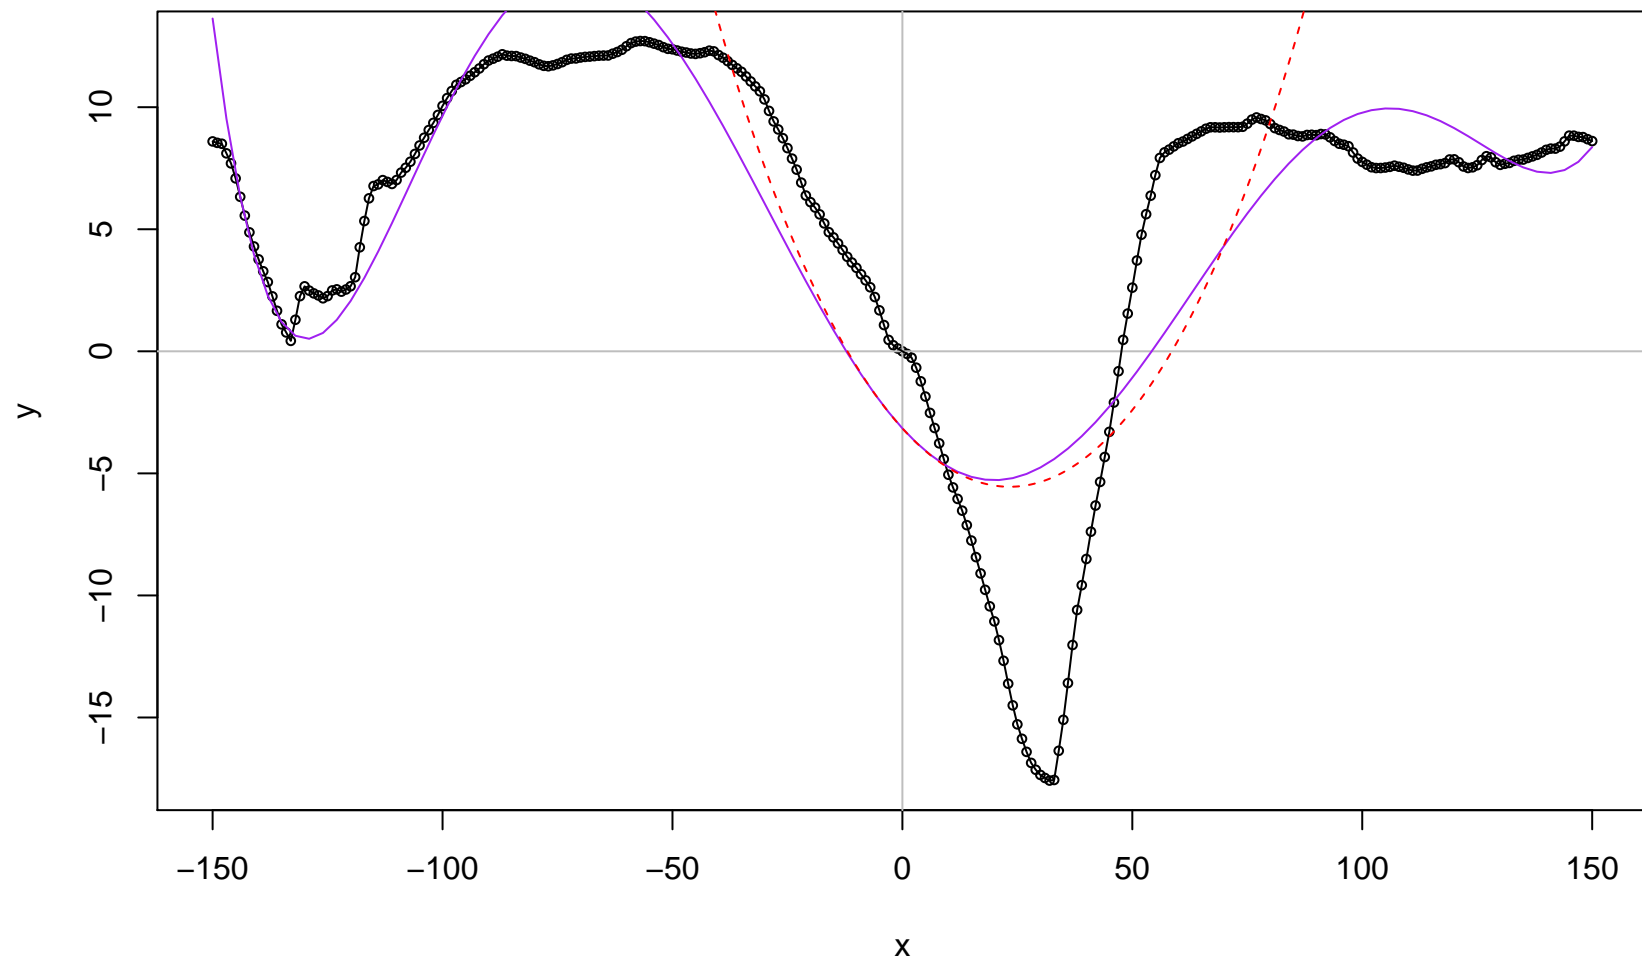

Site 263

$K \cdot 100 = 1.1117$

$R^2 = 0.9663$

radius= 89.9528

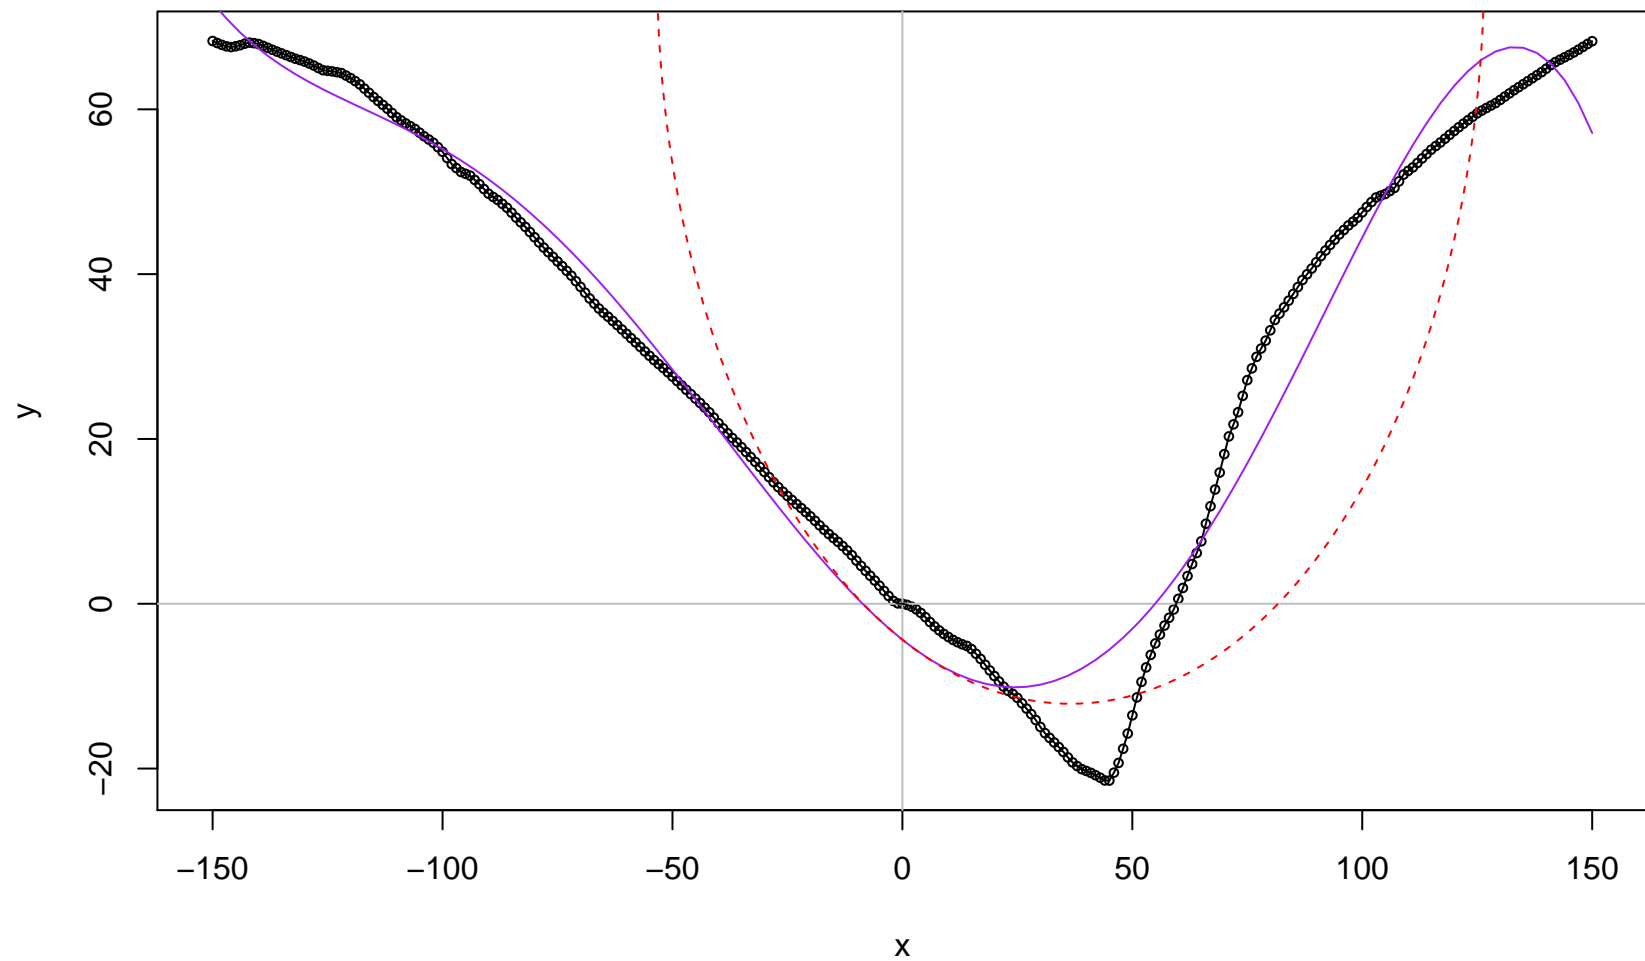

Site 264

$K*100 = -0.5522$

$R^2 = 0.9965$

radius =  $-181.0993$

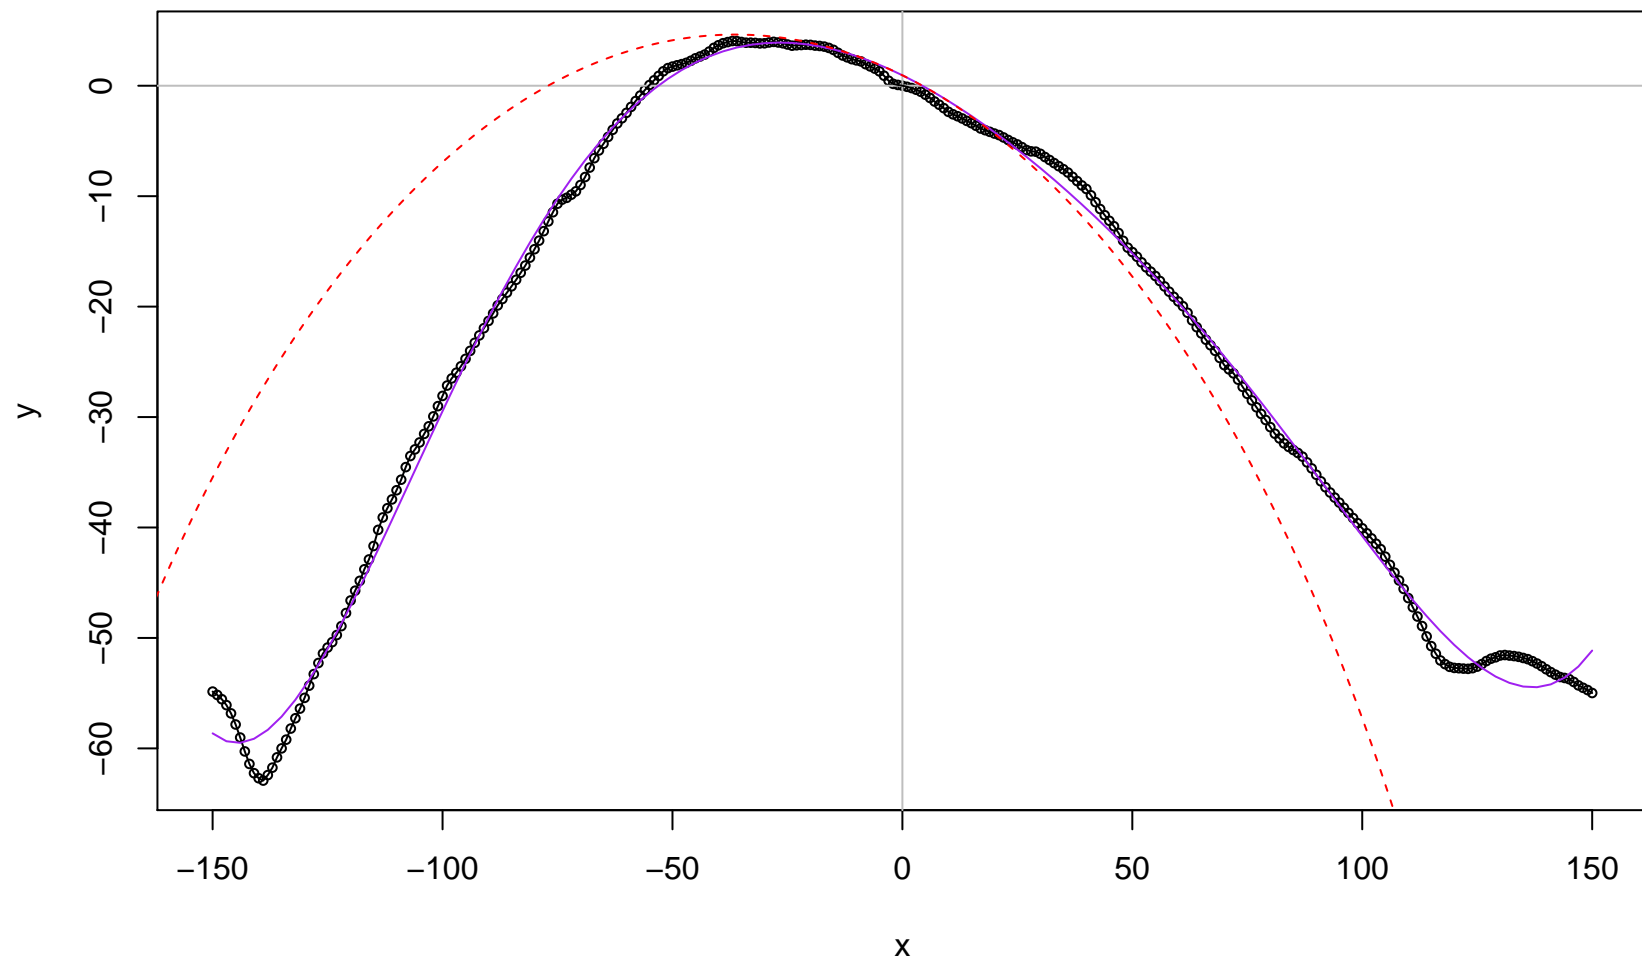



Site 265

$K*100= 0.8773$

$R^2= 0.9126$

radius= 113.9853

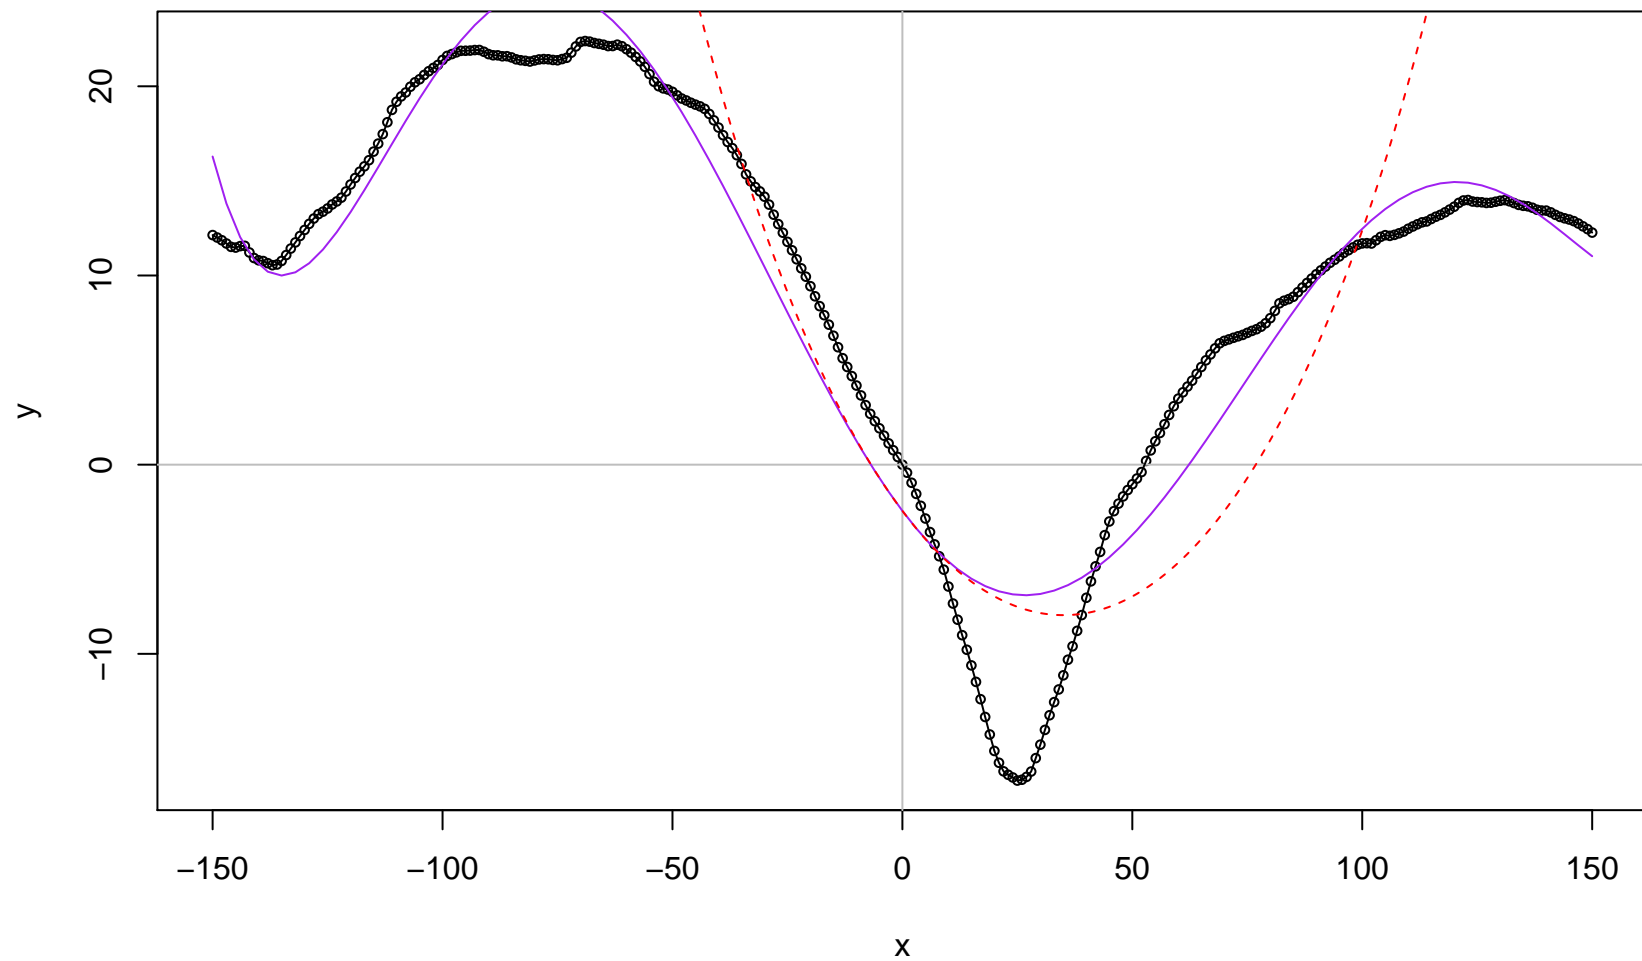

Site 266

$K \cdot 100 = 0.7862$

$R^2 = 0.9756$

radius= 127.1884

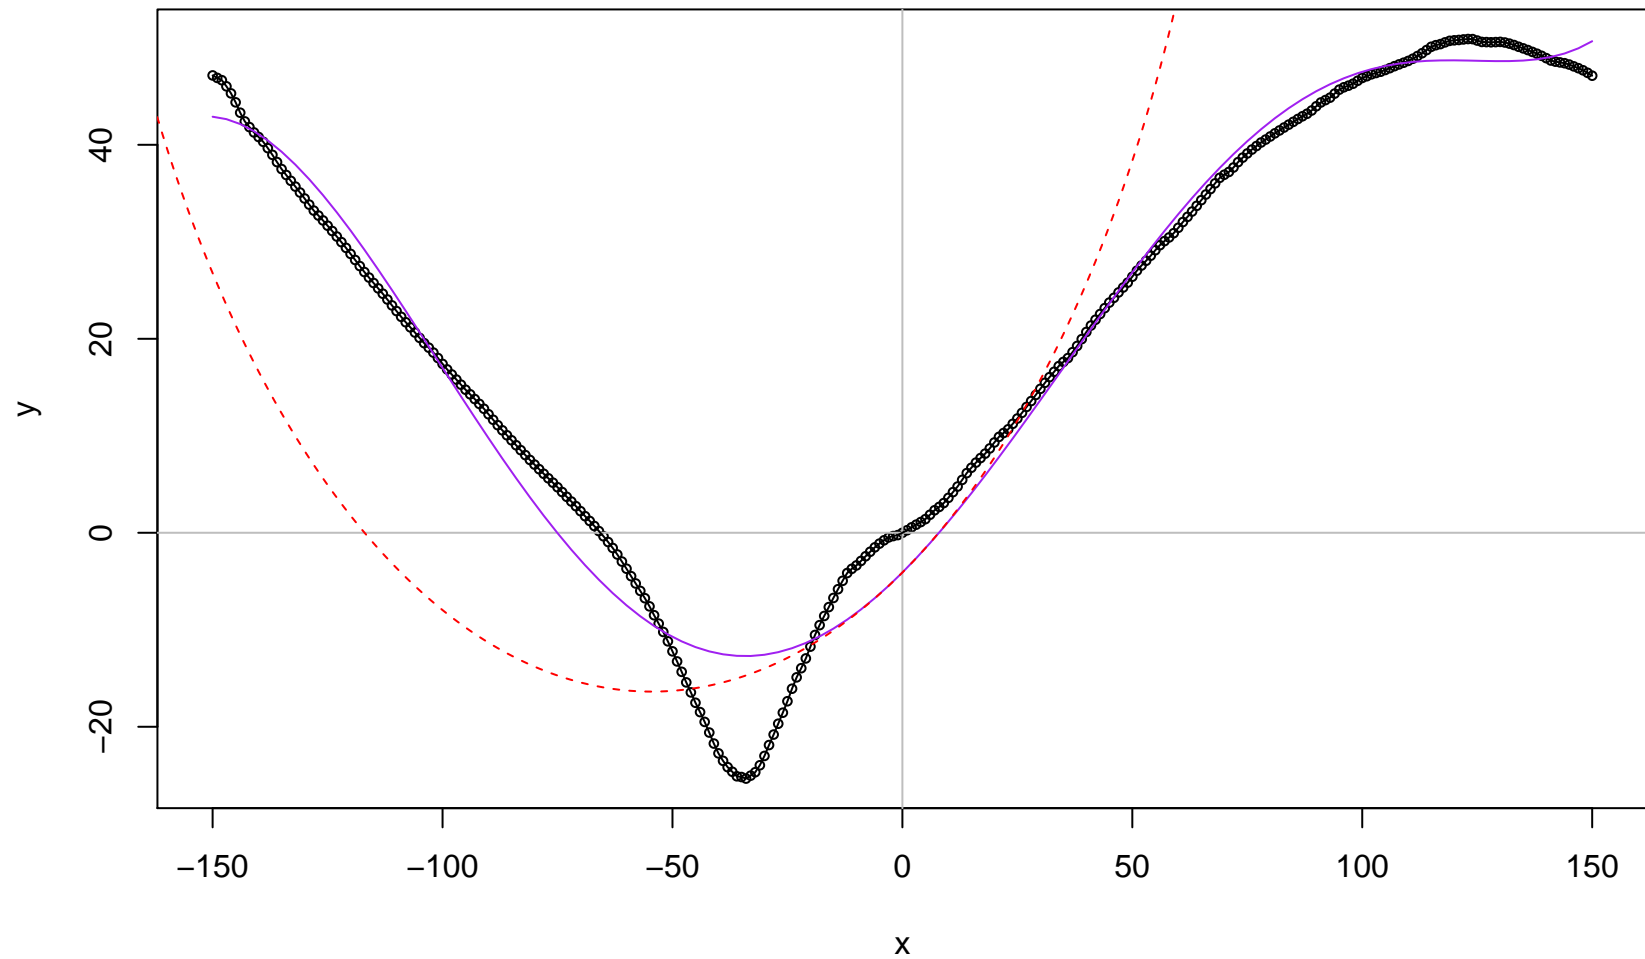

Site 267

$K*100= 0.2896$

$R^2= 0.899$

radius= 345.2985

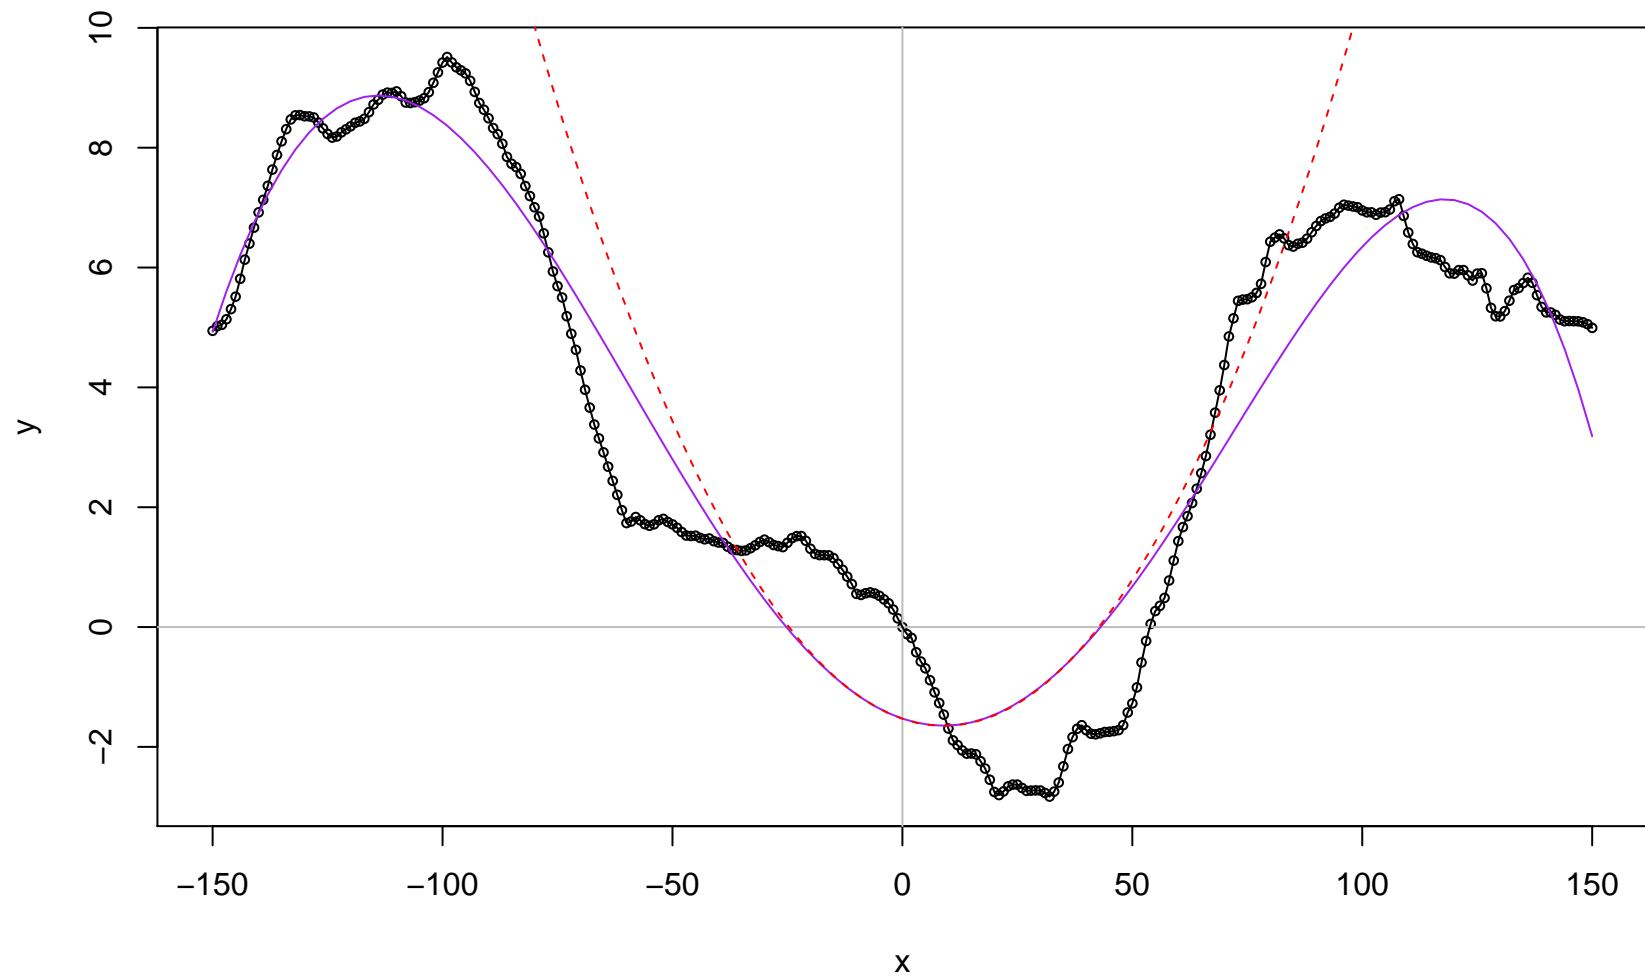

Site 268

$K^*100 = -0.0172$

$R^2 = 0.9734$

radius =  $-5803.5152$

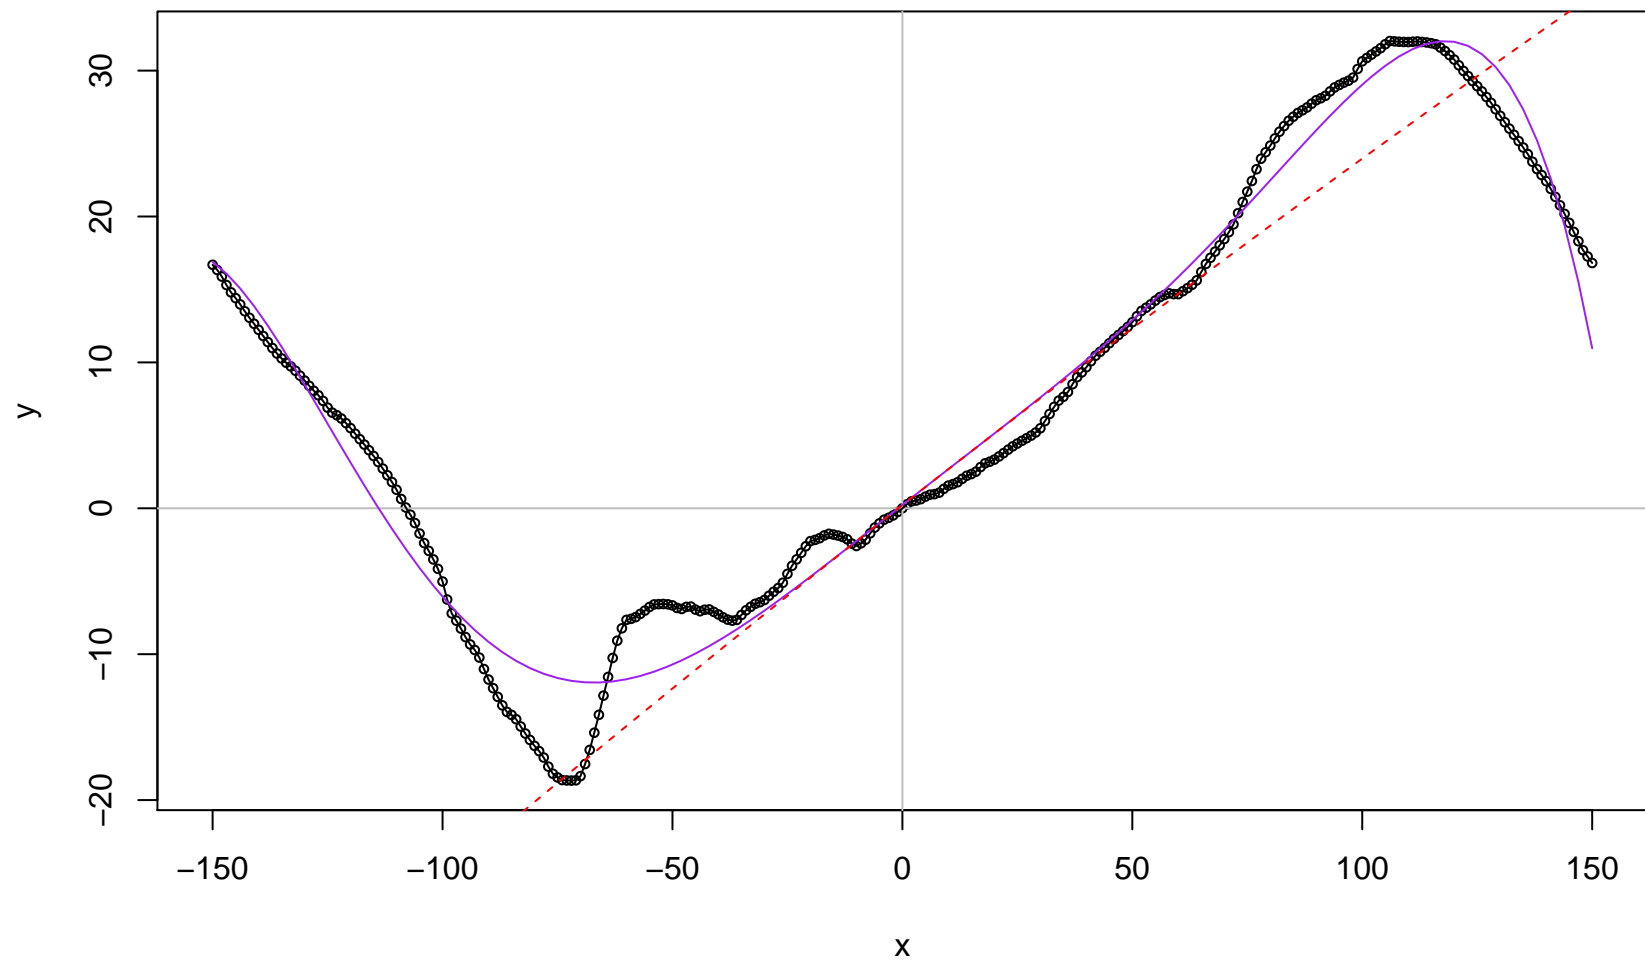

Site 269

$K*100 = -0.0539$

$R^2 = 0.974$

radius =  $-1854.8019$

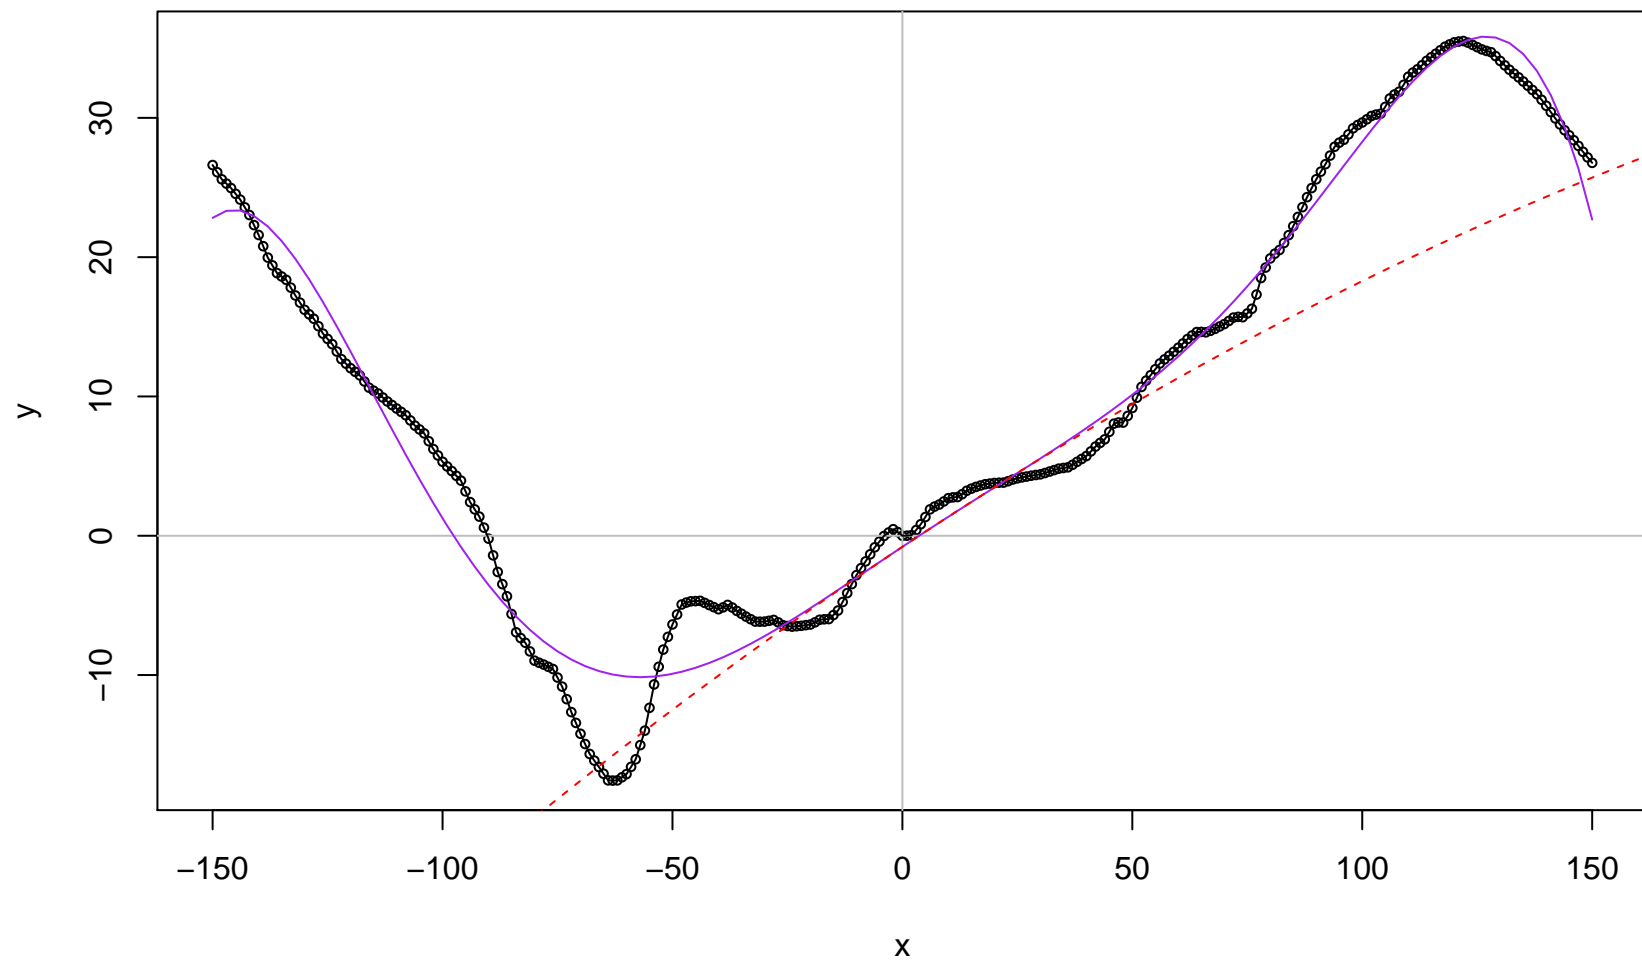

Site 270

$K*100 = -0.5965$

$R^2 = 0.9299$

radius =  $-167.6375$

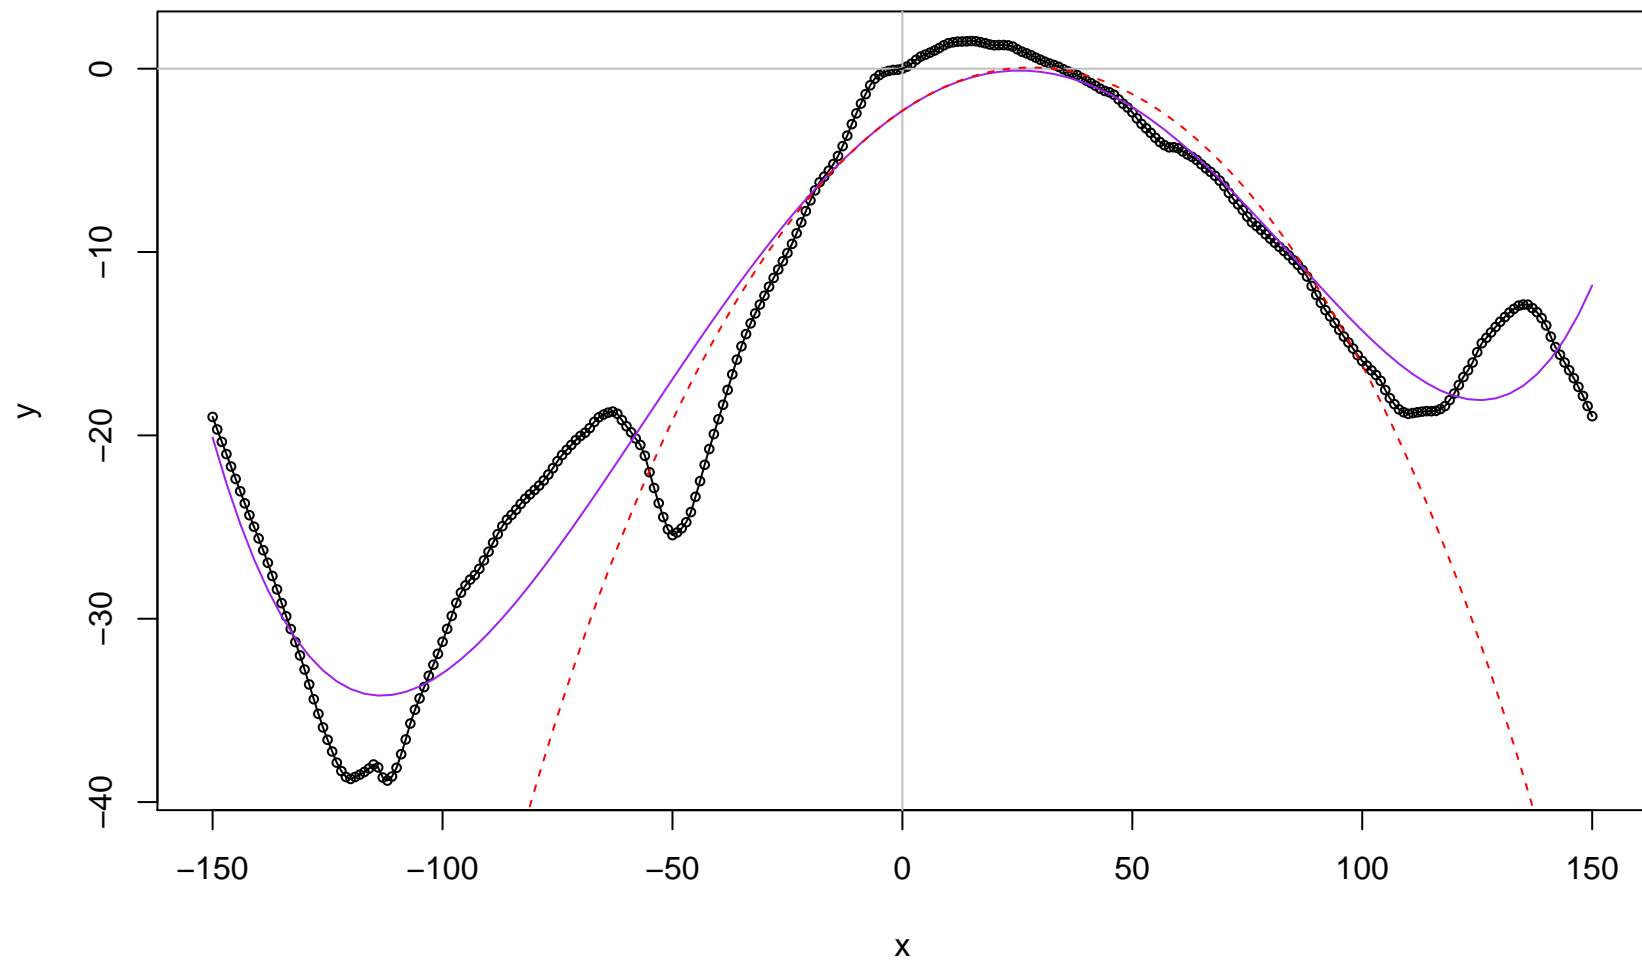

Site 271

$K*100= 0.0308$

$R^2= 0.9484$

radius= 3251.4713

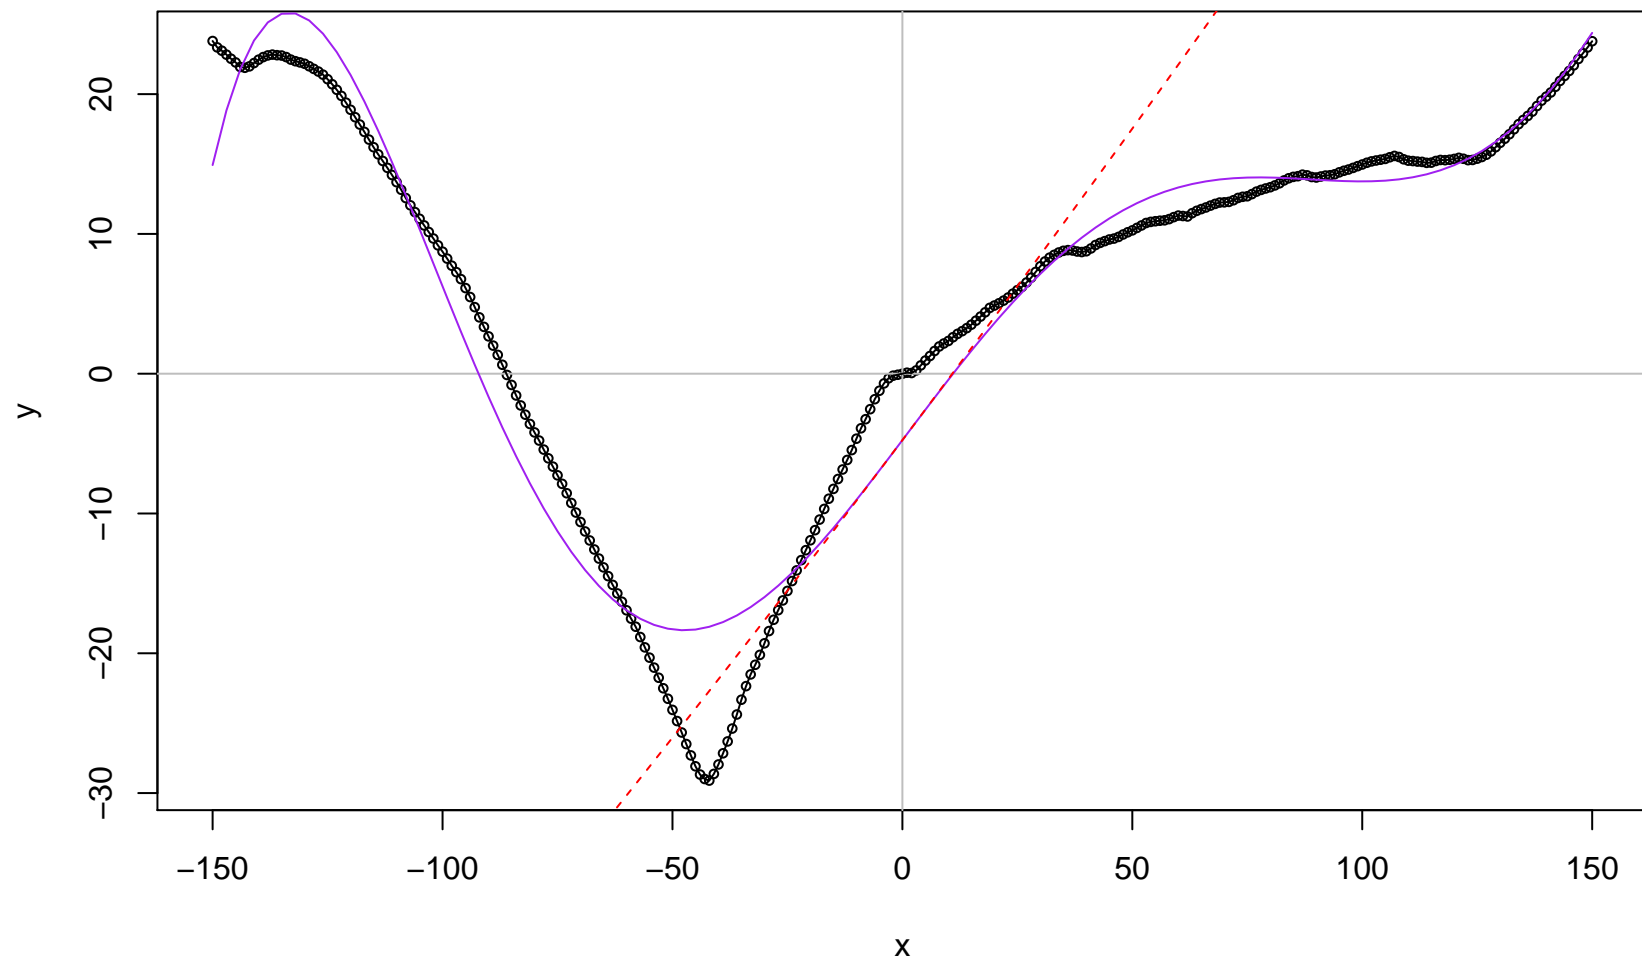

Site 272

$K \cdot 100 = 0.1505$

$R^2 = 0.9557$

radius= 664.4116

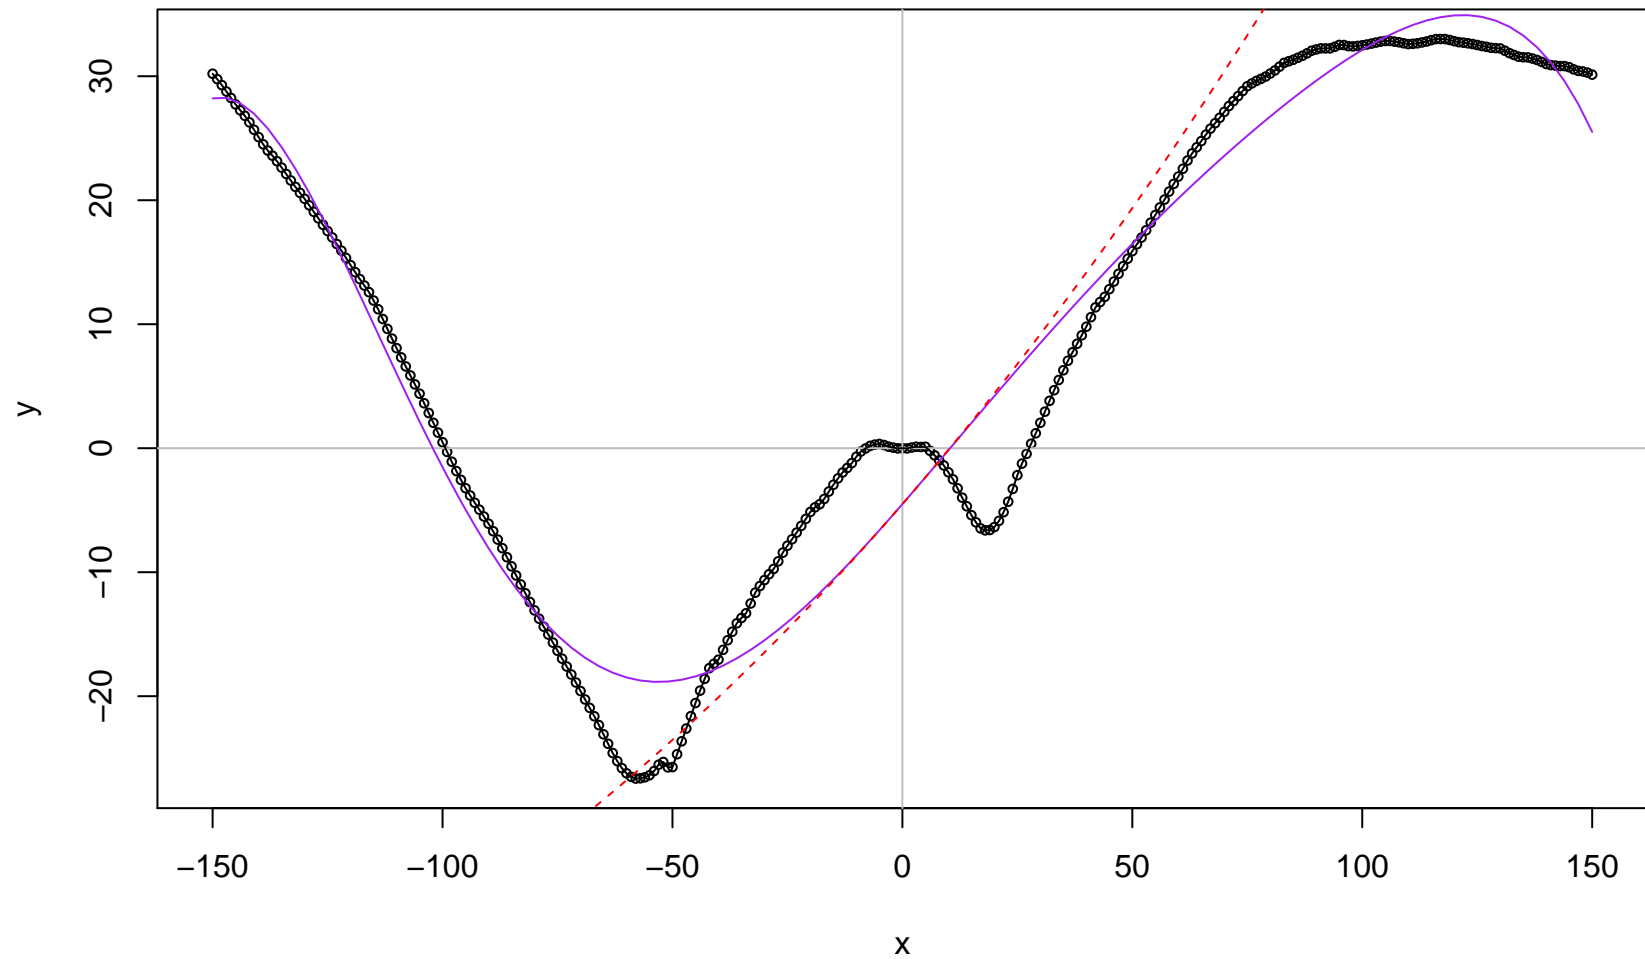



Site 273

$K \cdot 100 = 0.3782$

$R^2 = 0.9871$

radius= 264.4017

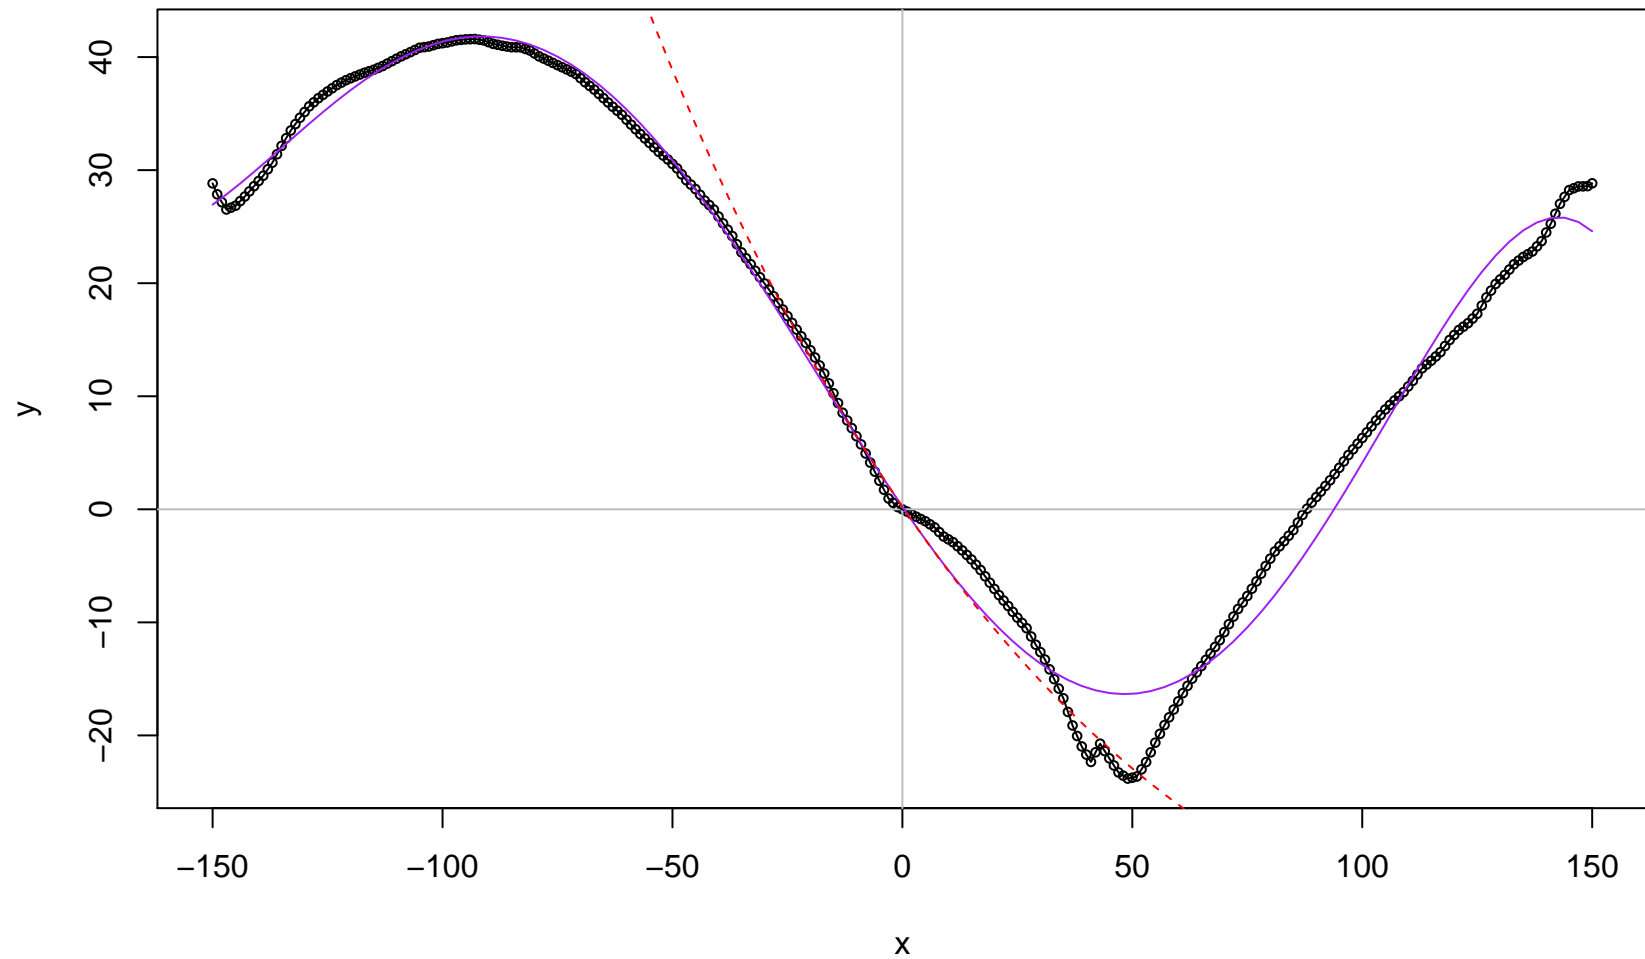

Site 274

$K*100 = -0.6515$

$R^2 = 0.9208$

radius =  $-153.4959$

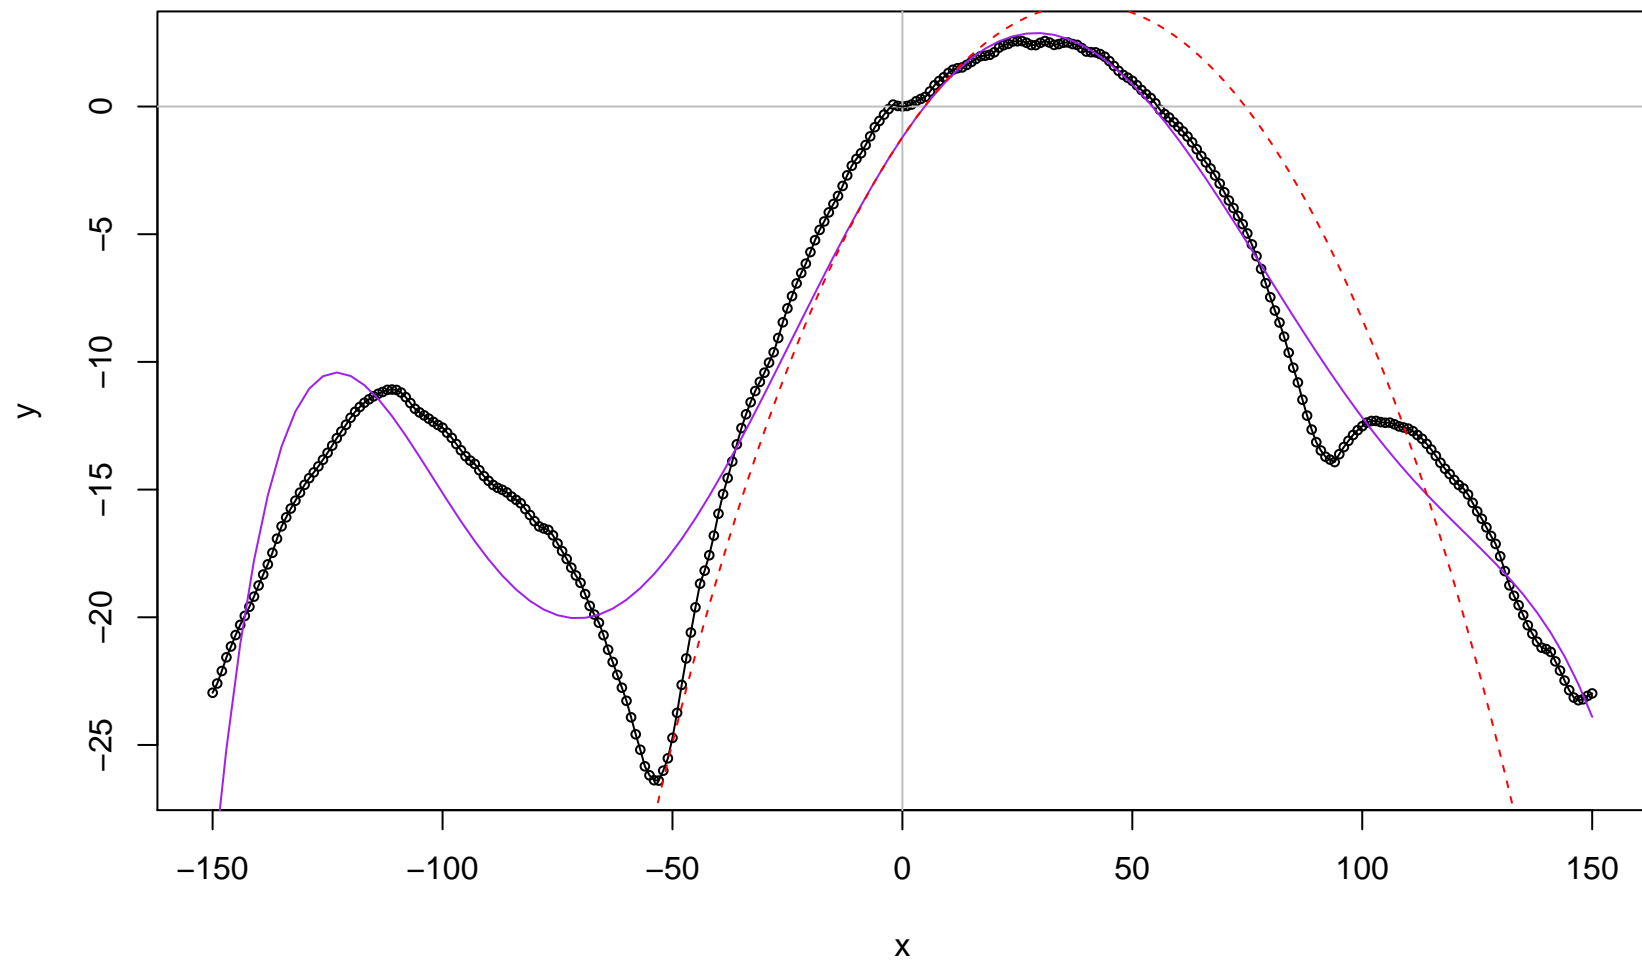

Site 275

$K*100= 1.2196$

$R2= 0.8823$

radius= 81.9946

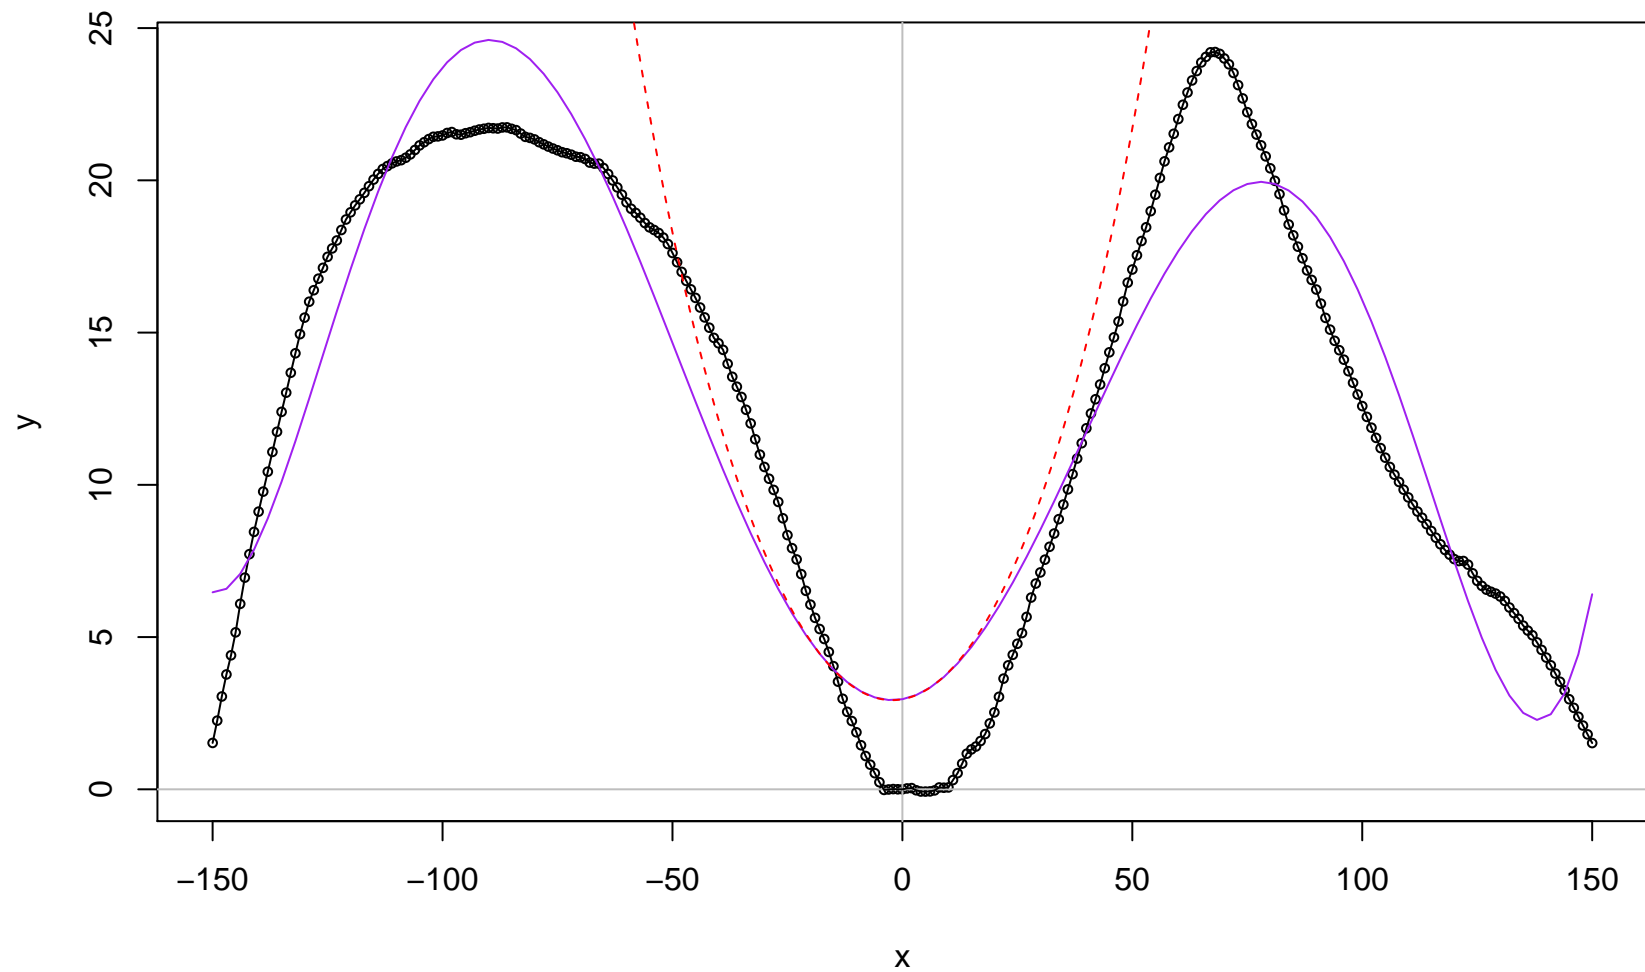

Site 276

$K \cdot 100 = -2.081$

$R^2 = 0.9737$

radius =  $-48.0546$

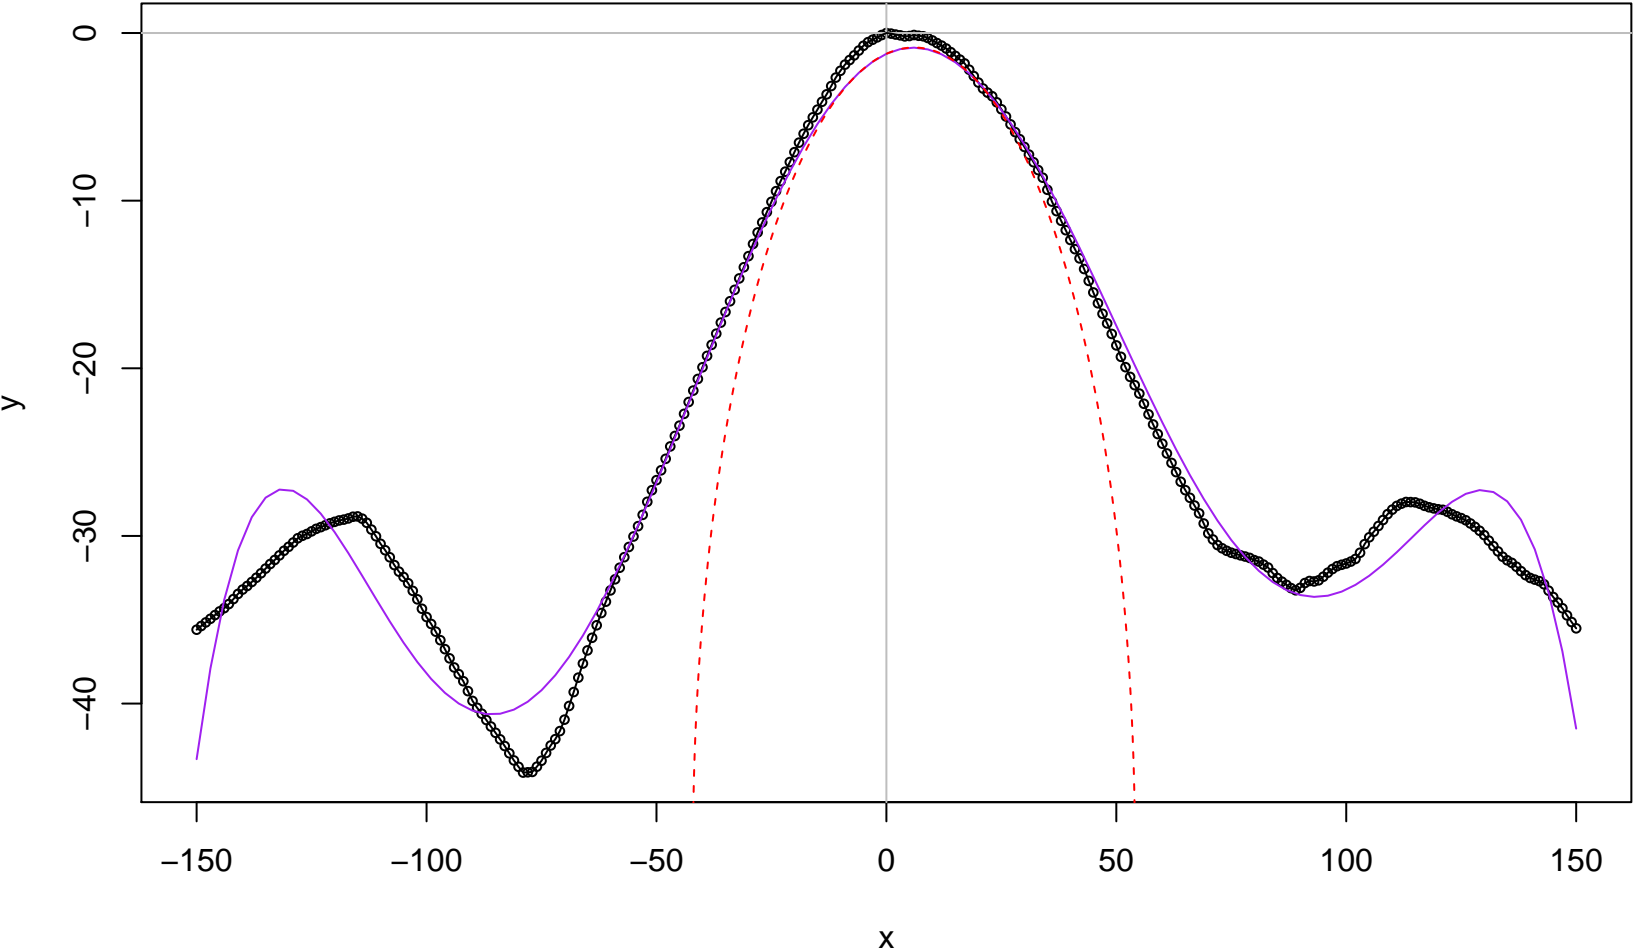

Site 277

$K*100 = -1.0127$

$R^2 = 0.9589$

radius =  $-98.7449$

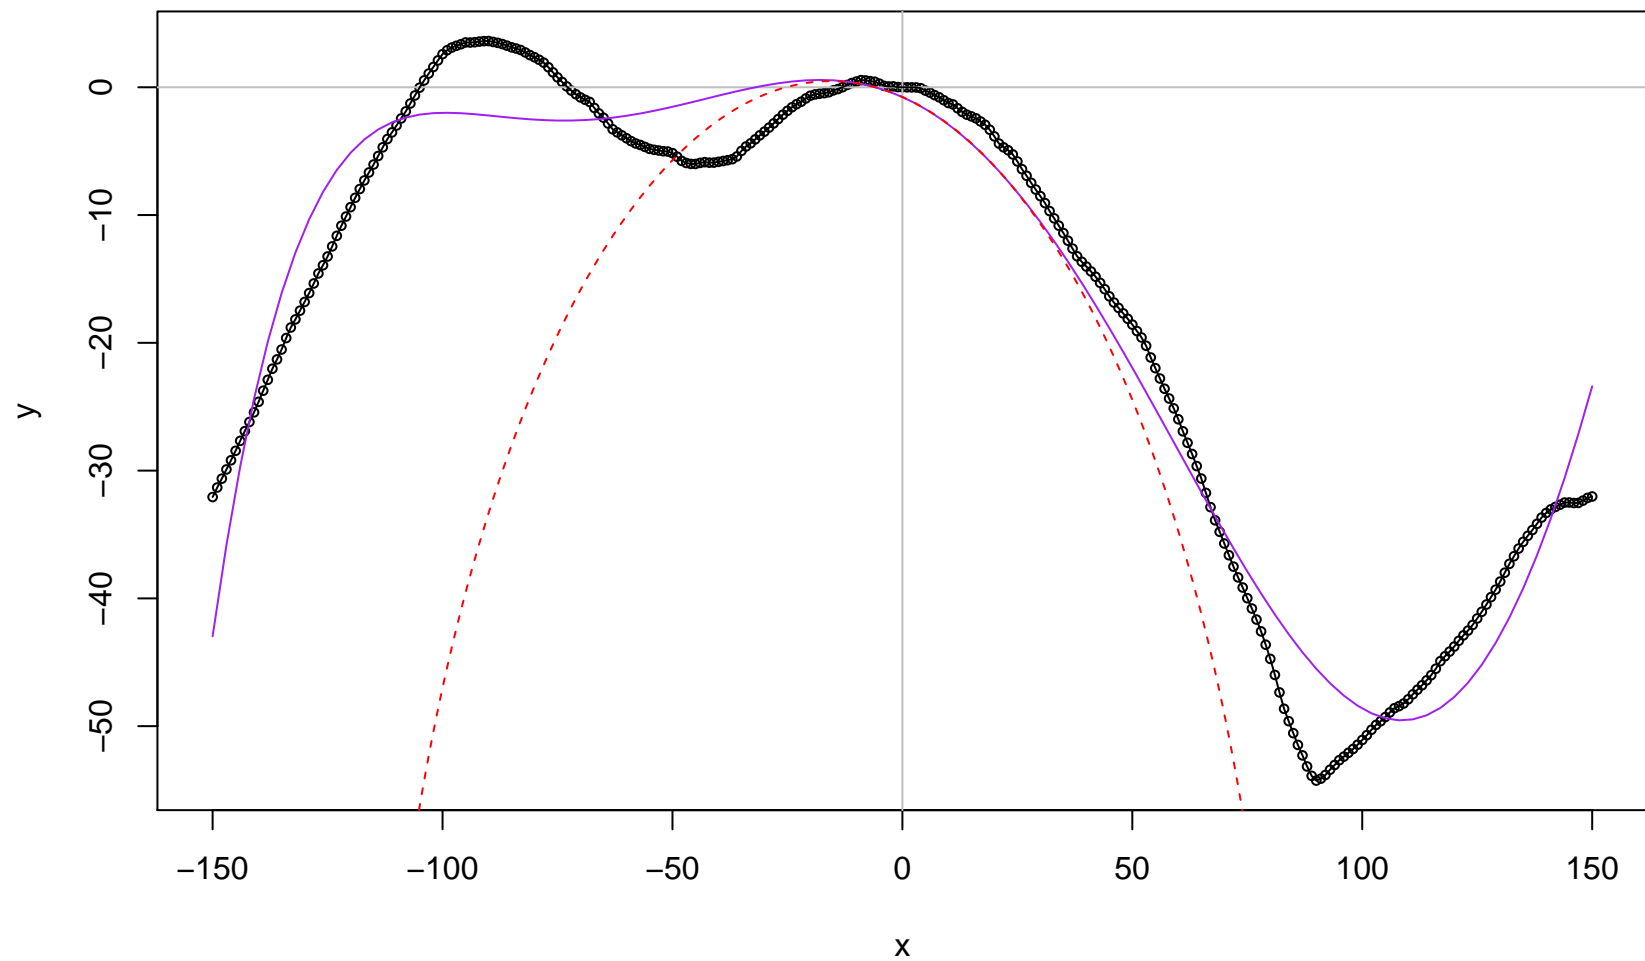

Site 278

$K*100= 0.9837$

$R2= 0.9873$

radius= 101.6543

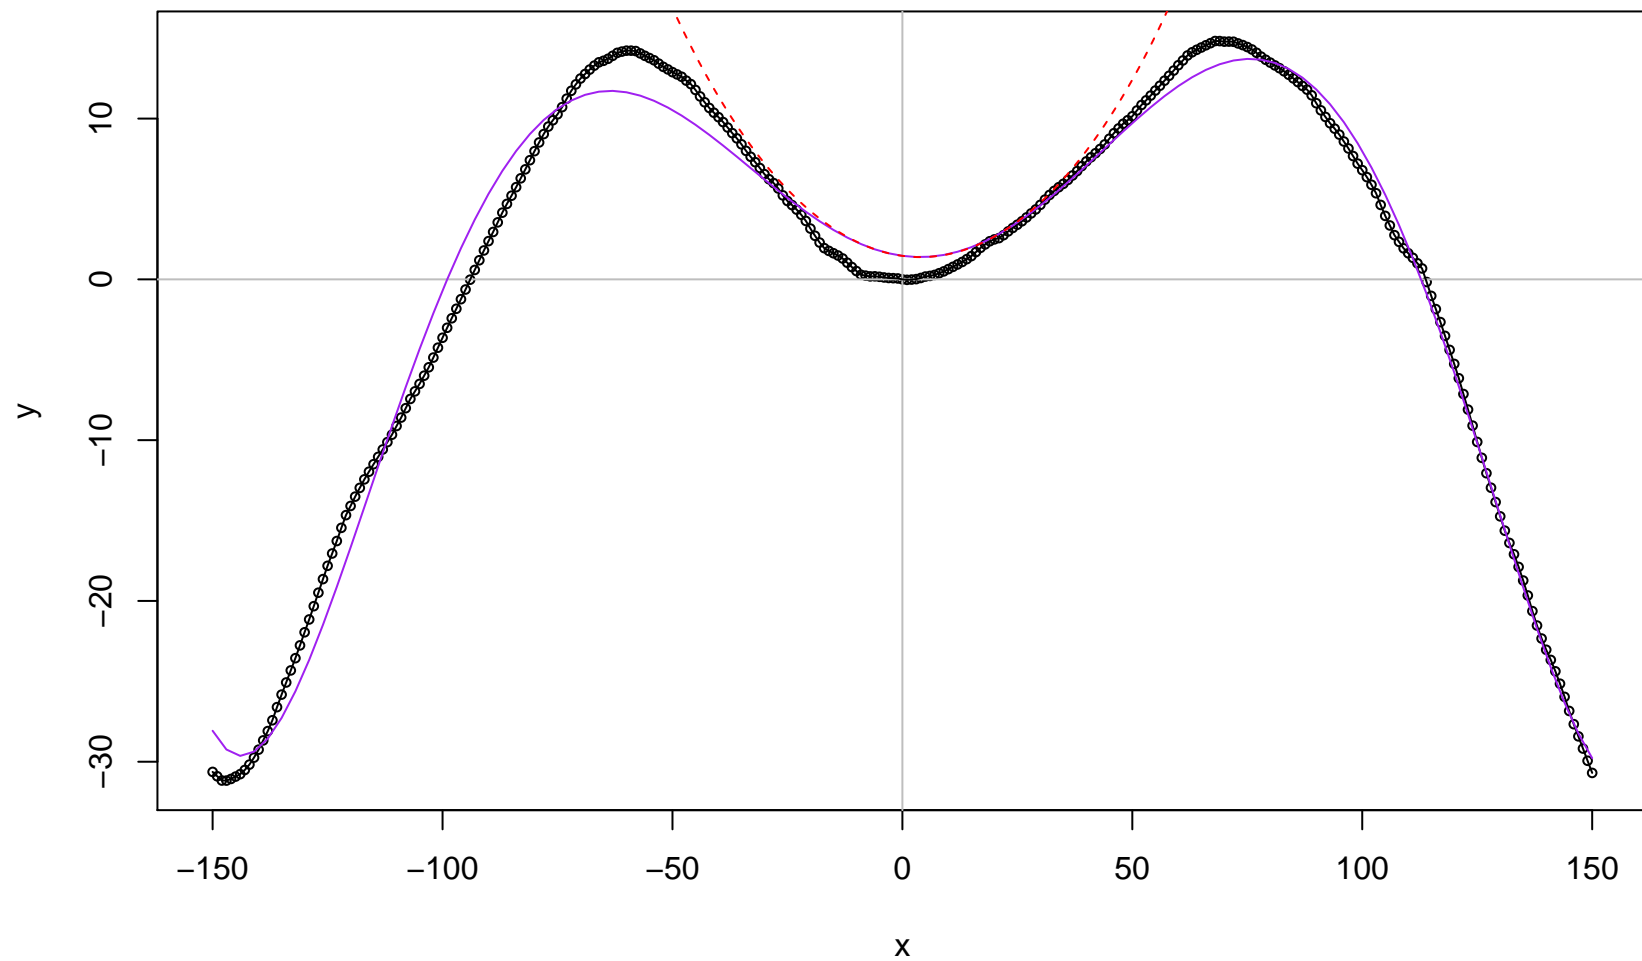

Site 279

$K*100 = -0.8536$

$R^2 = 0.915$

radius = -117.1493

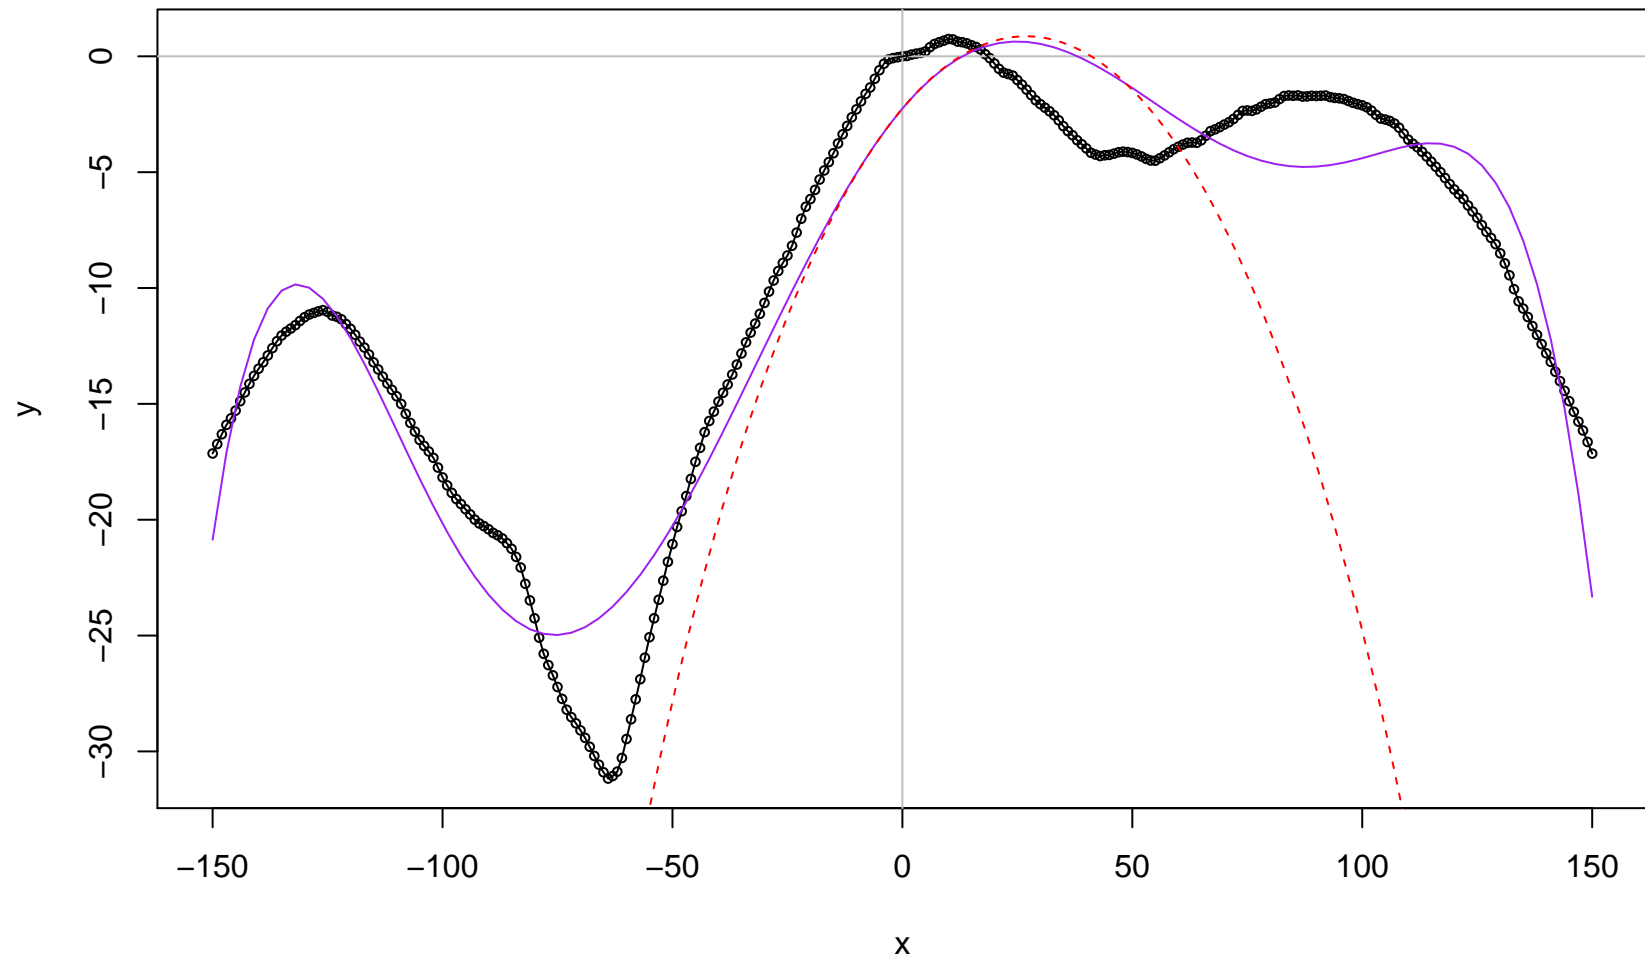

Site 280

$K*100 = -0.1897$

$R^2 = 0.9743$

radius =  $-527.2252$

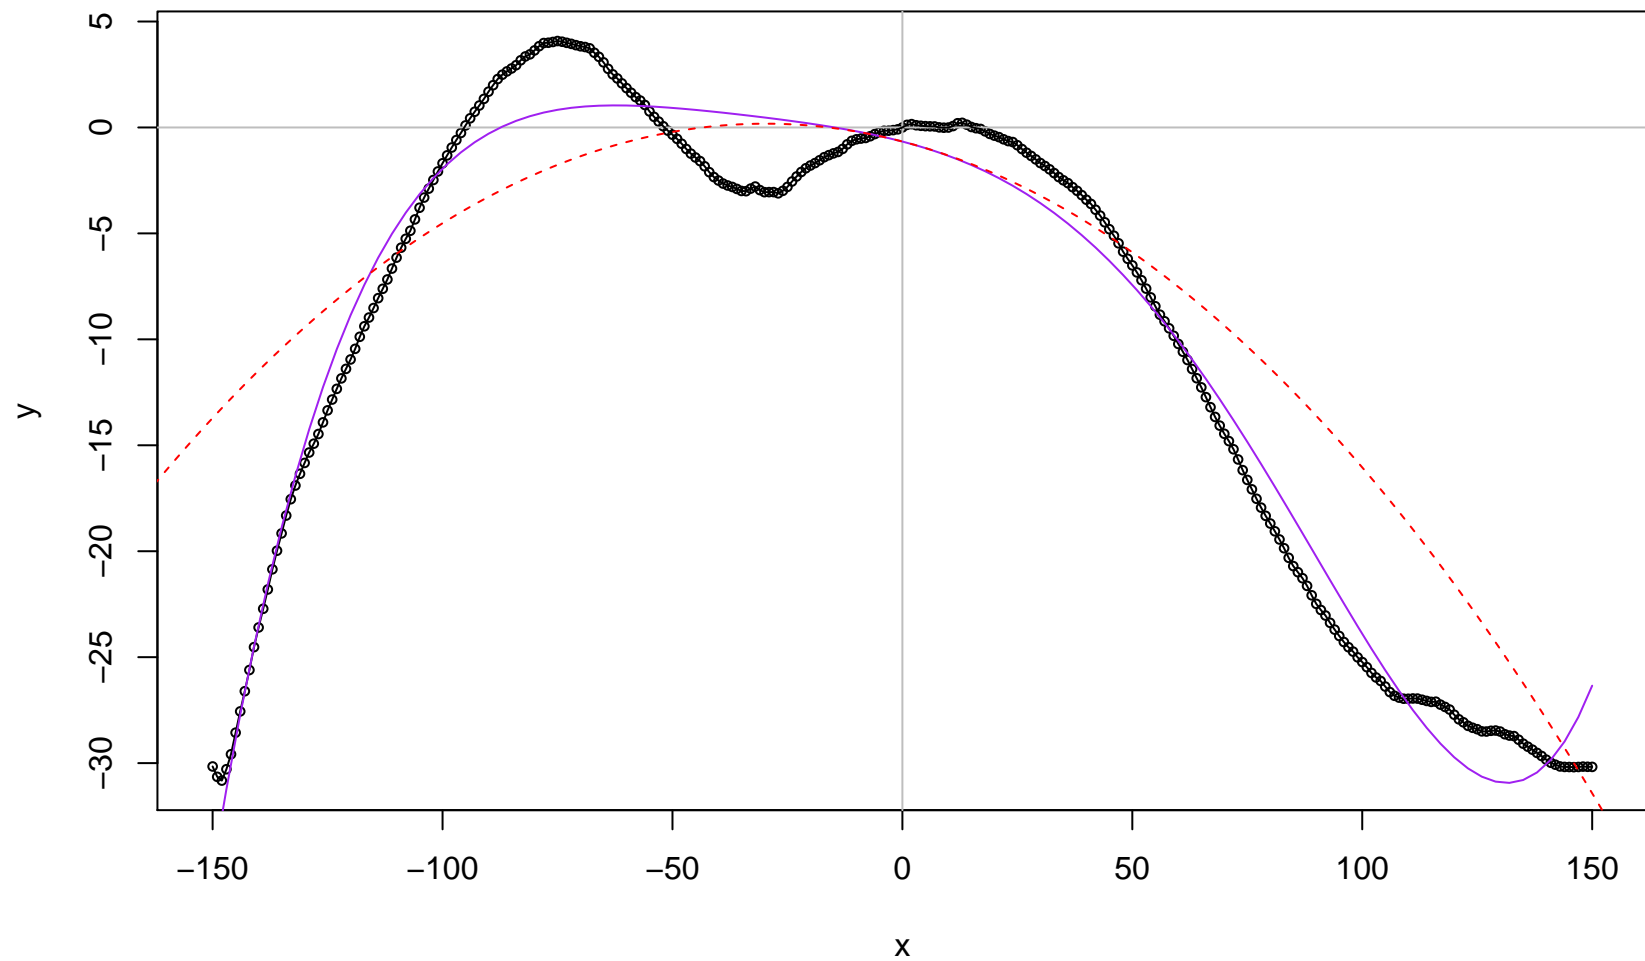



Site 281

$K*100 = -0.1413$

$R^2 = 0.9851$

radius =  $-707.9352$

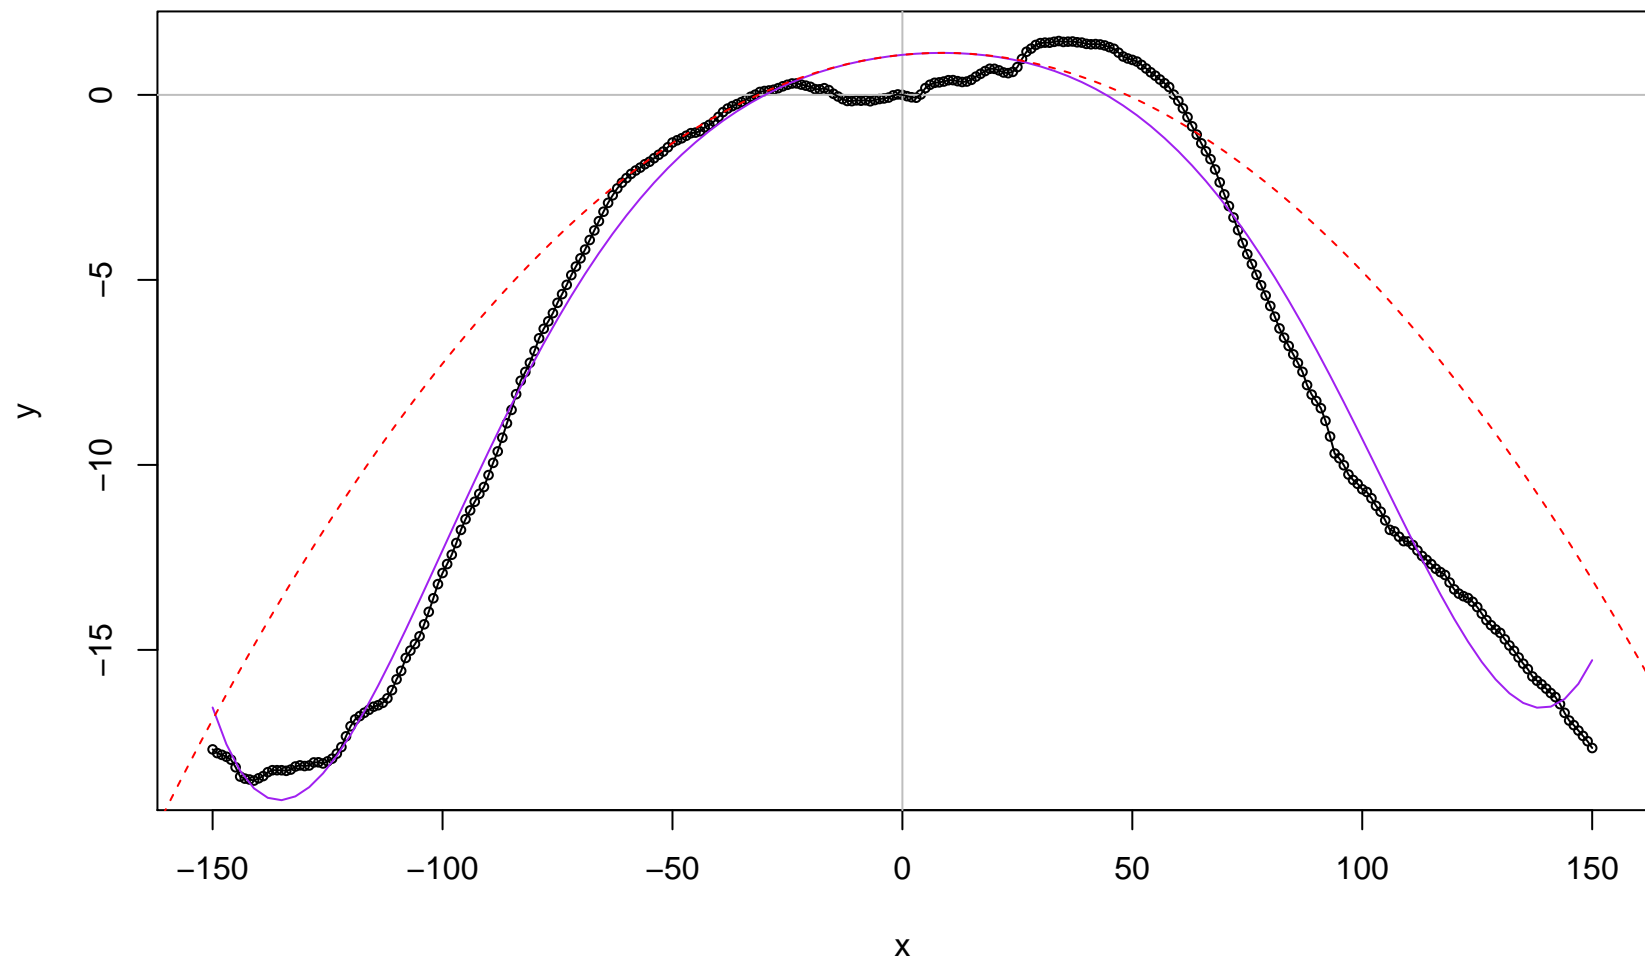

Site 282

$K*100 = -0.4937$

$R^2 = 0.9903$

radius =  $-202.5638$

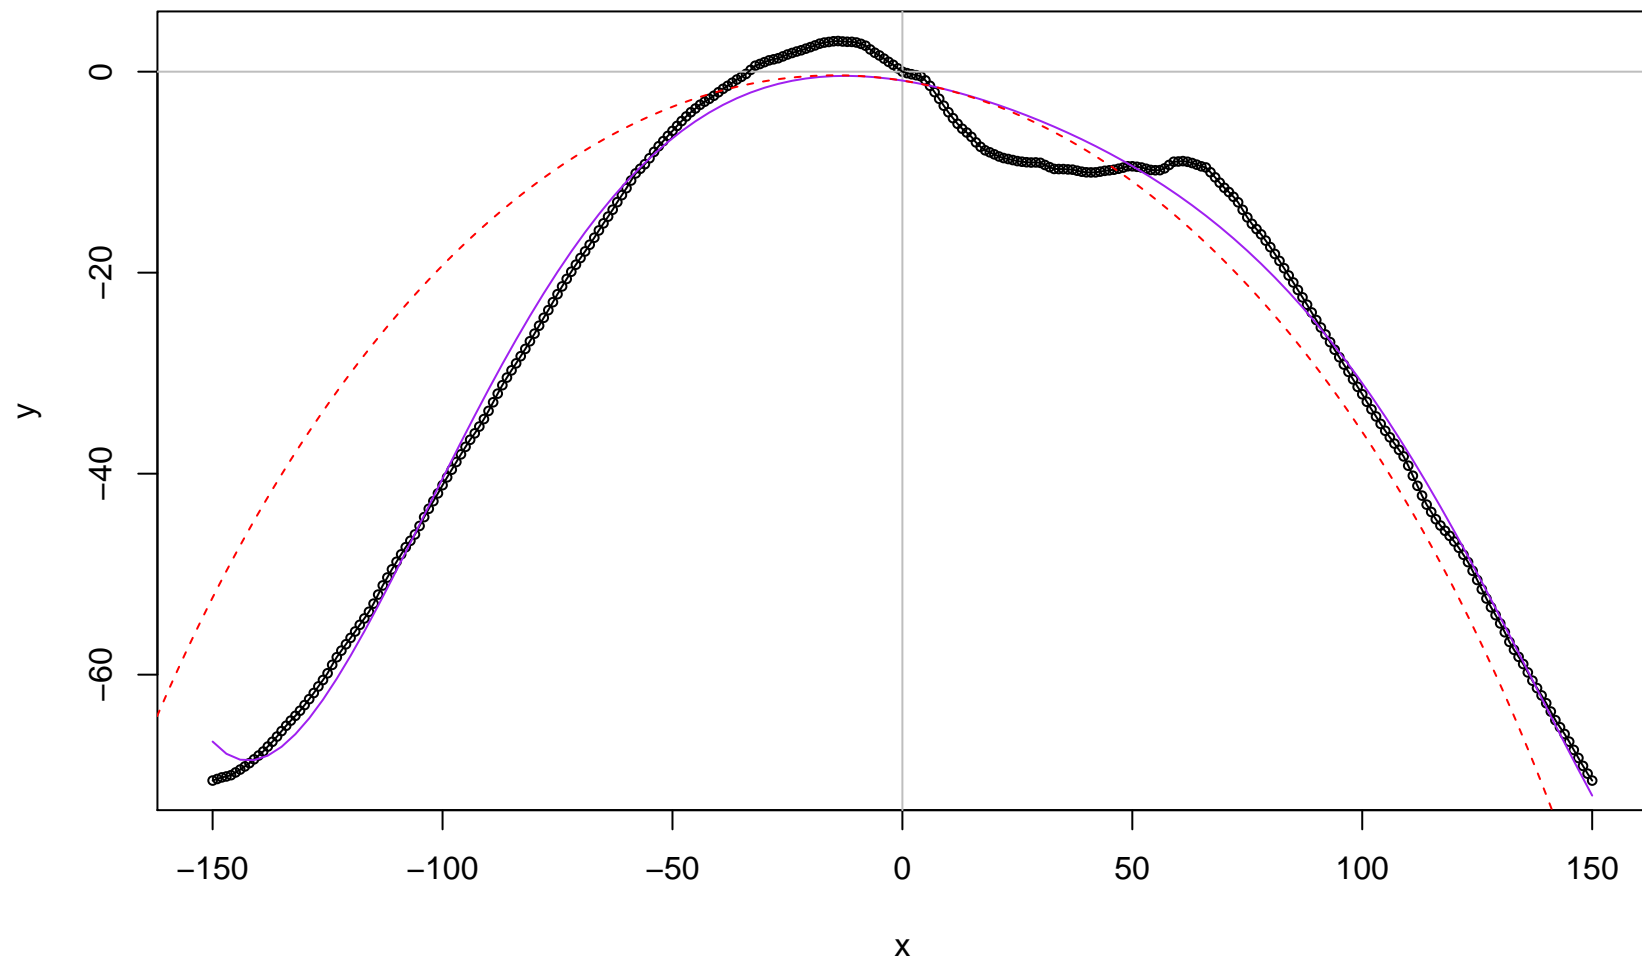

Site 283

$K*100= 0.4285$

$R^2= 0.9756$

radius= 233.3656

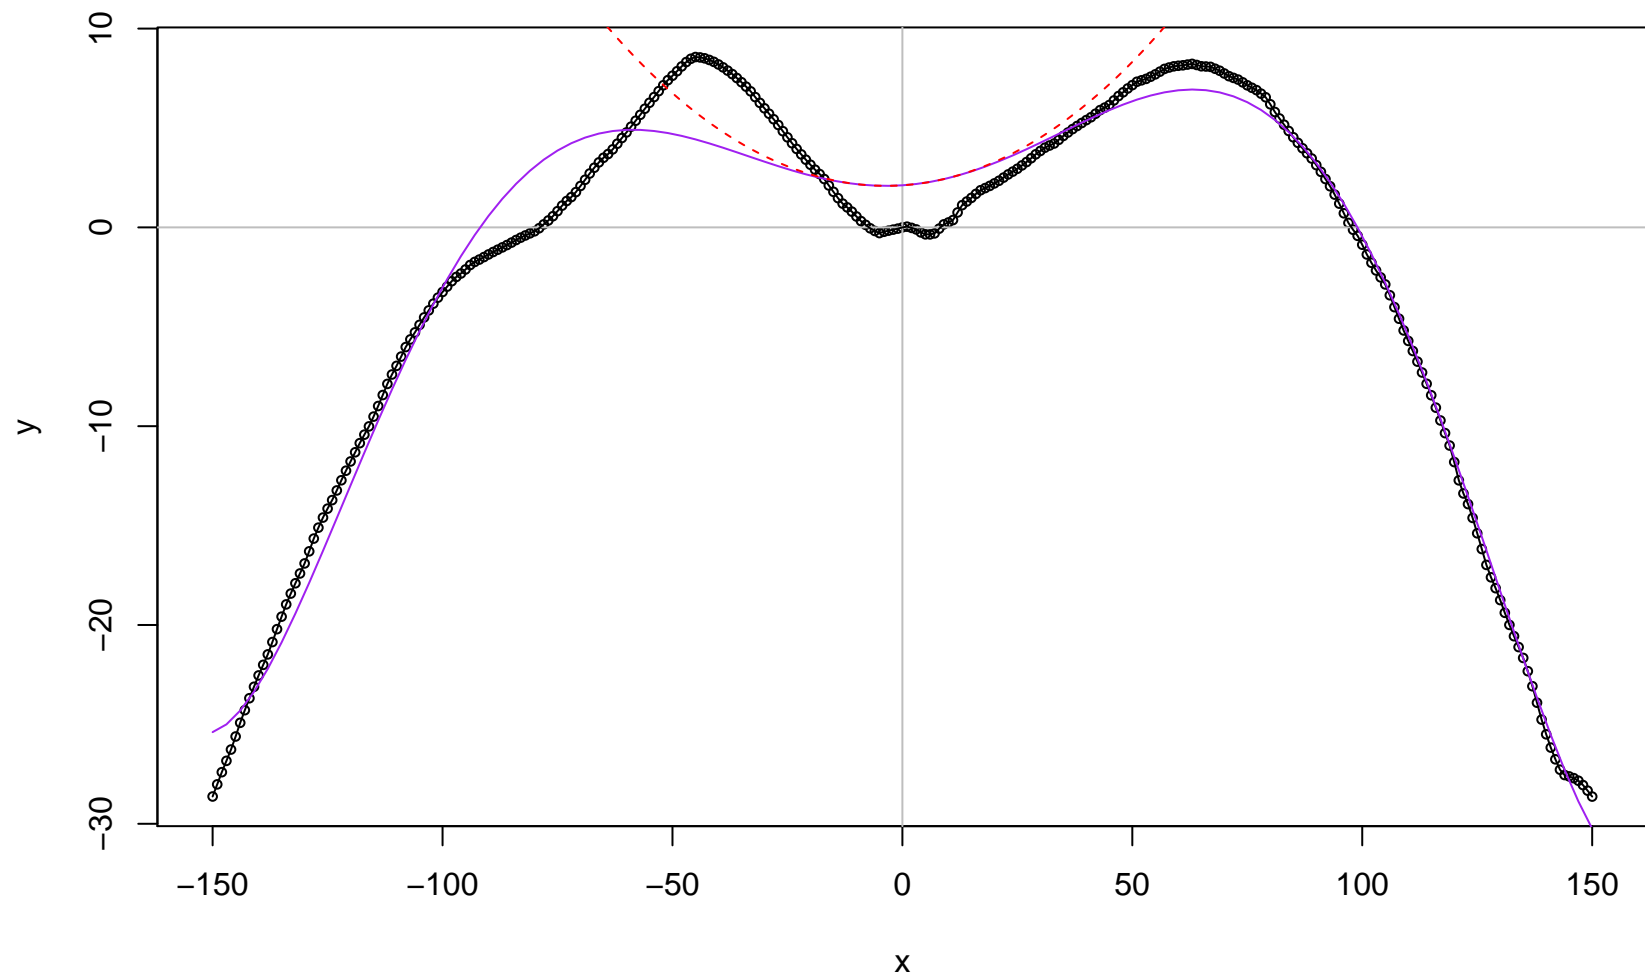

Site 284

$K*100 = -0.2417$

$R^2 = 0.9471$

radius=  $-413.7406$

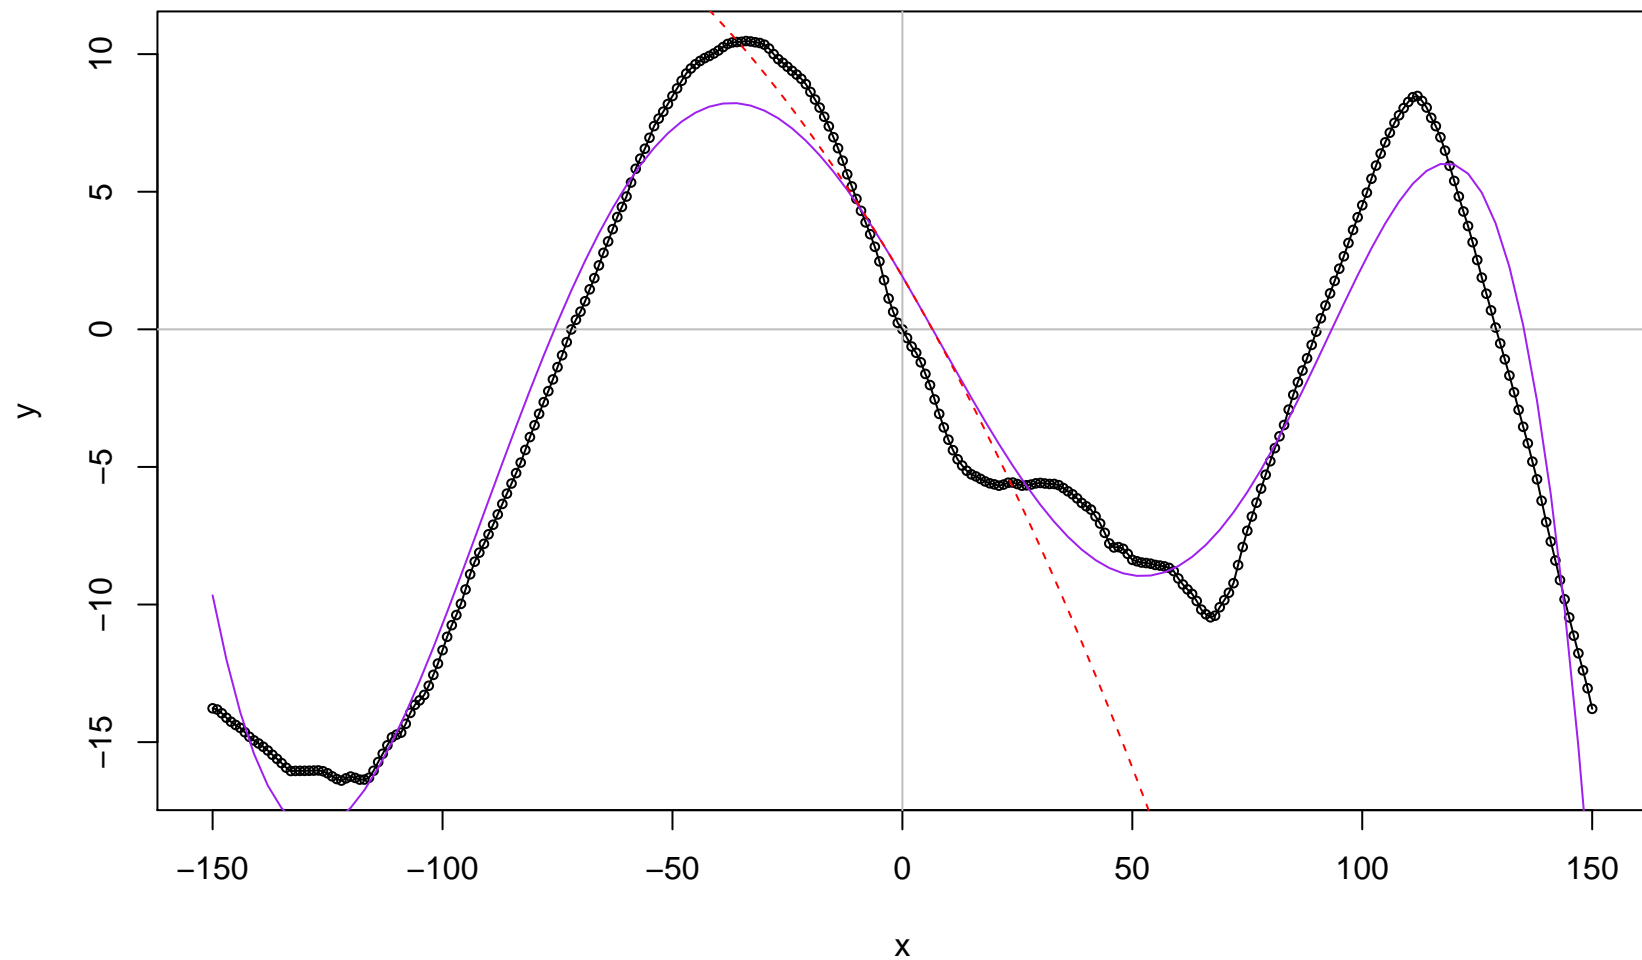

Site 285

$K \cdot 100 = 0.7402$

$R^2 = 0.9702$

radius= 135.1006

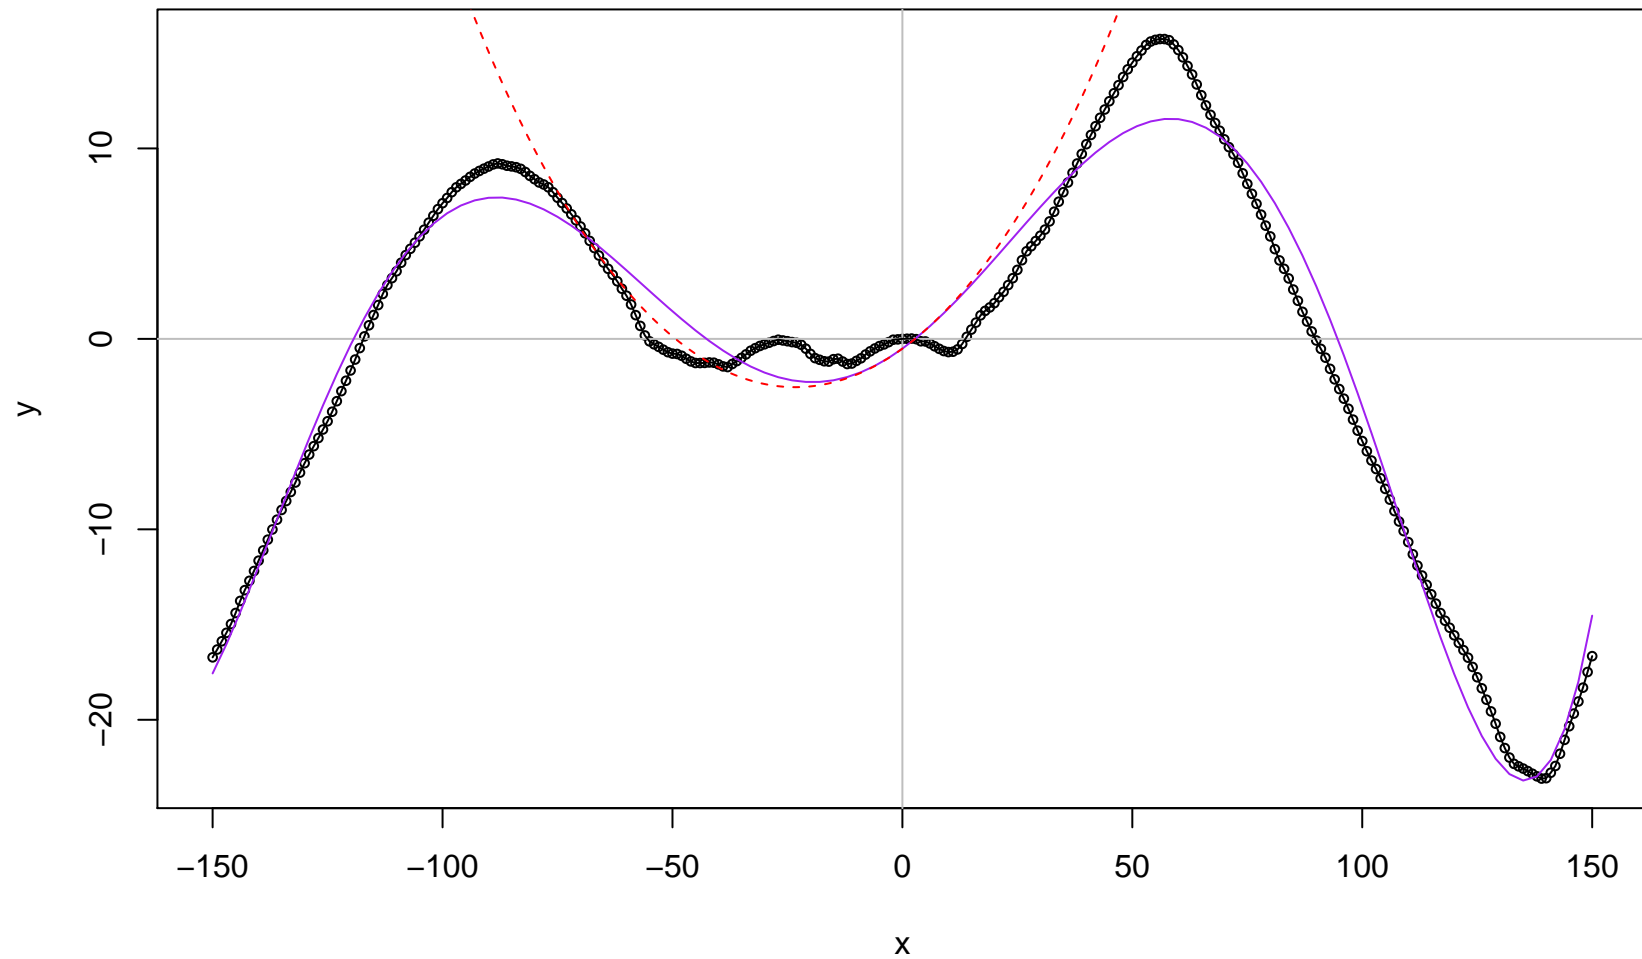

Site 286

$K*100= 0.8818$

$R2= 0.8794$

radius= 113.398

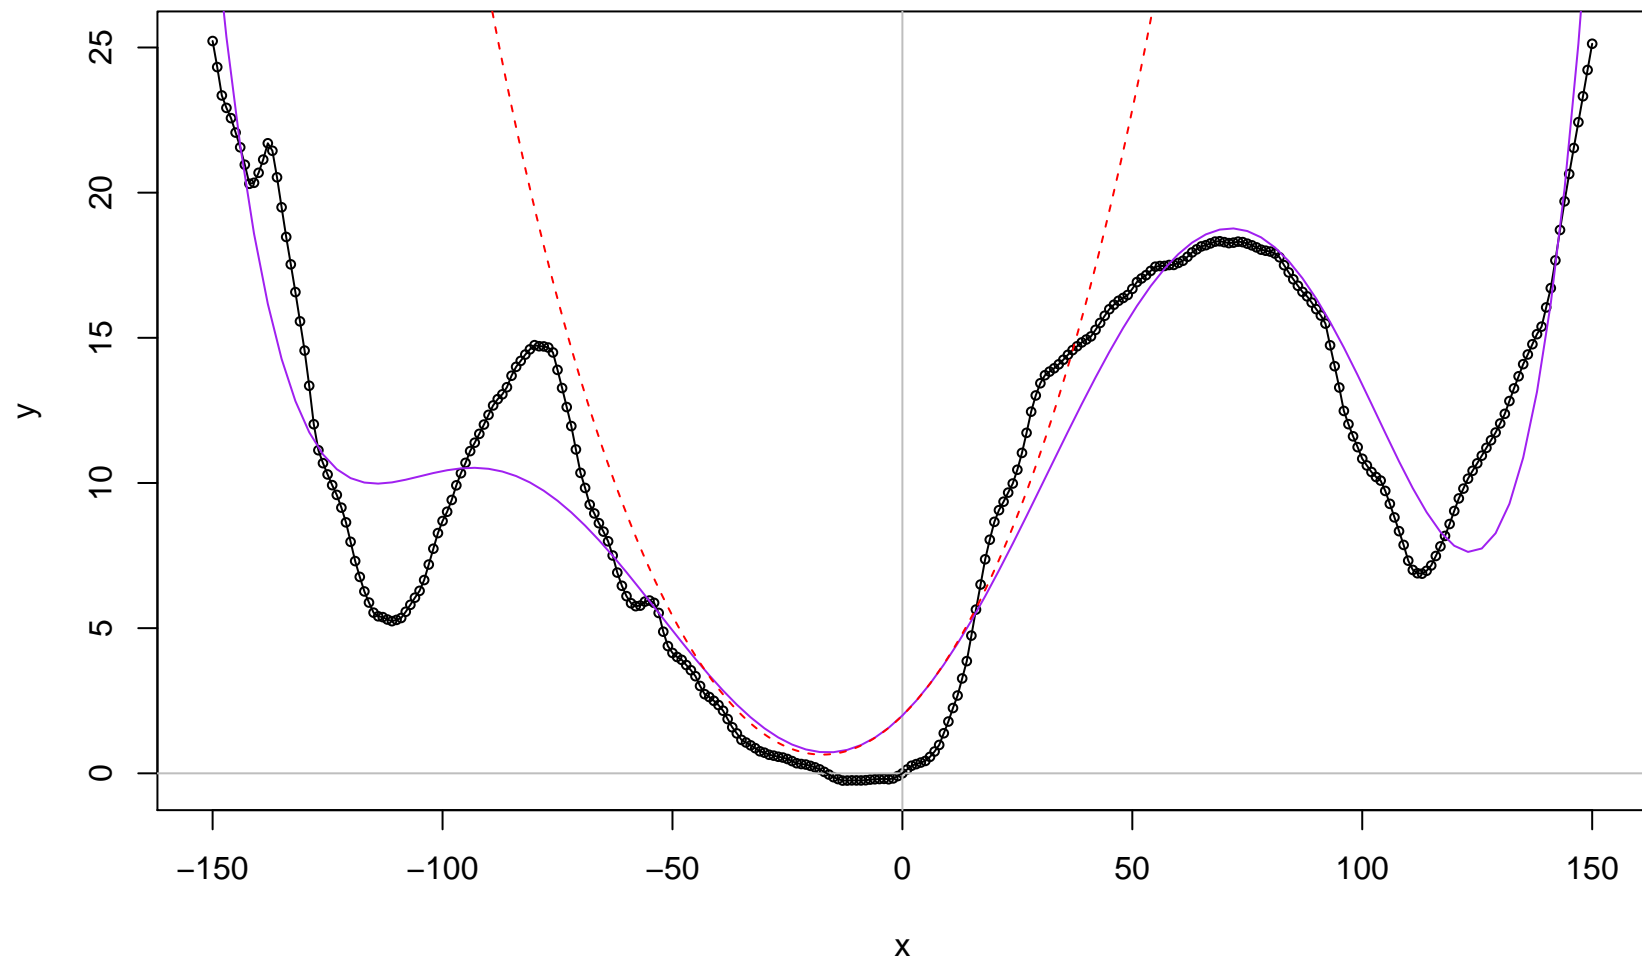

Site 287

$K \cdot 100 = 0.4066$

$R^2 = 0.9193$

radius= 245.9676

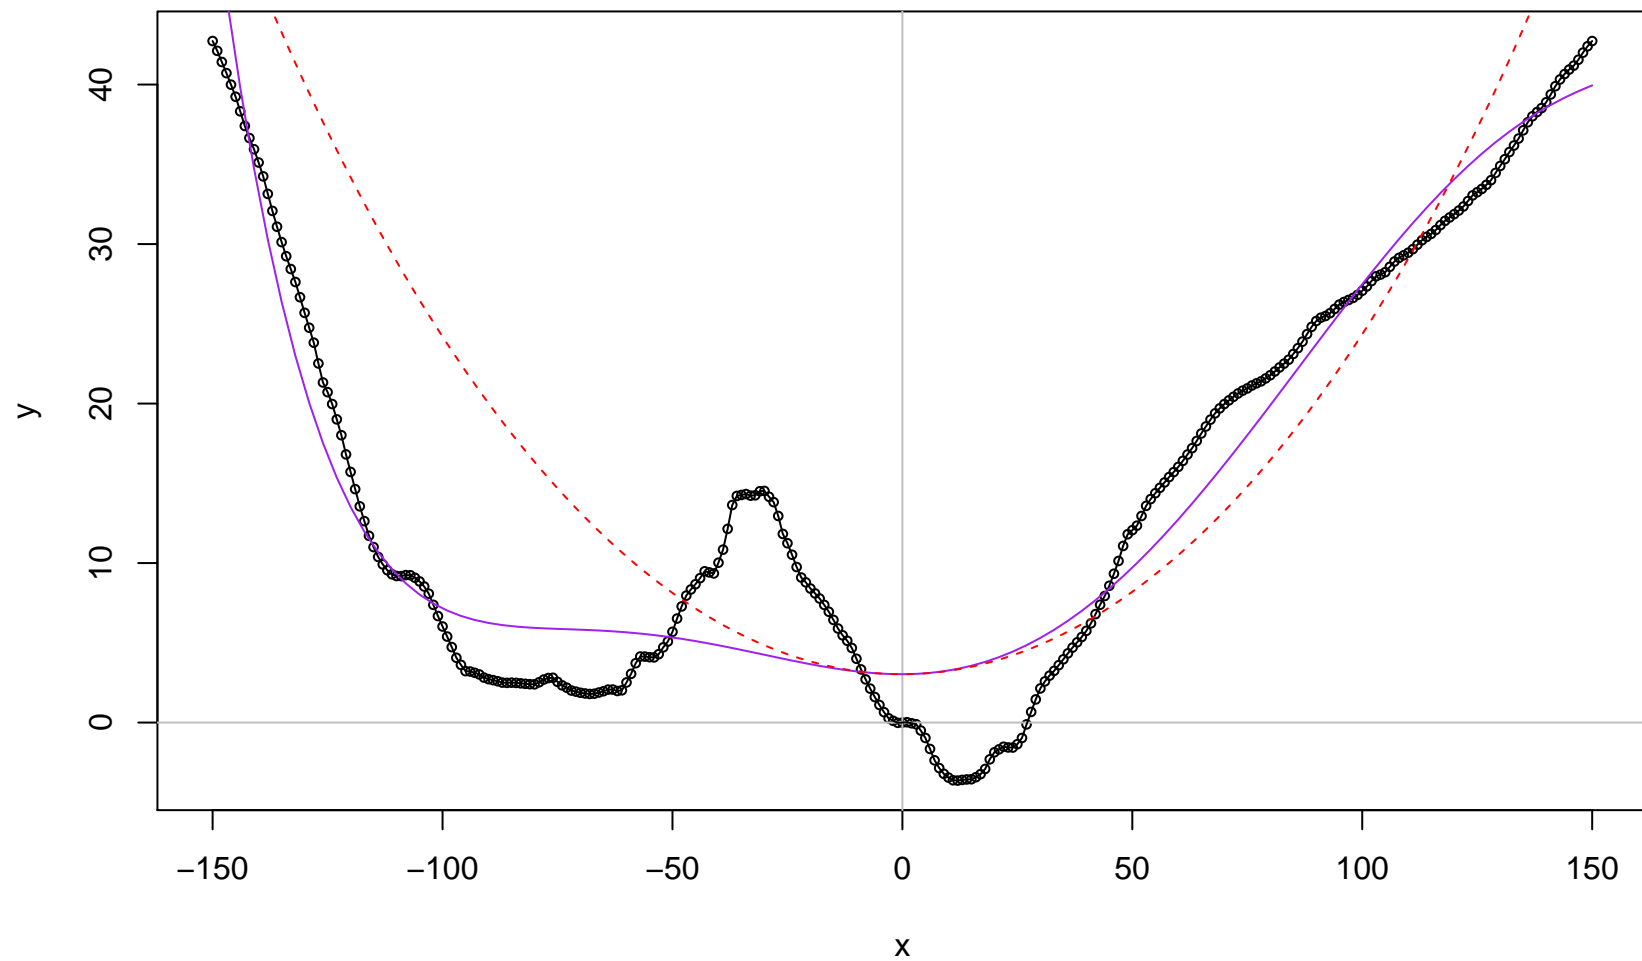

Site 288

$K*100= 1.7494$

$R^2= 0.9513$

radius= 57.1609

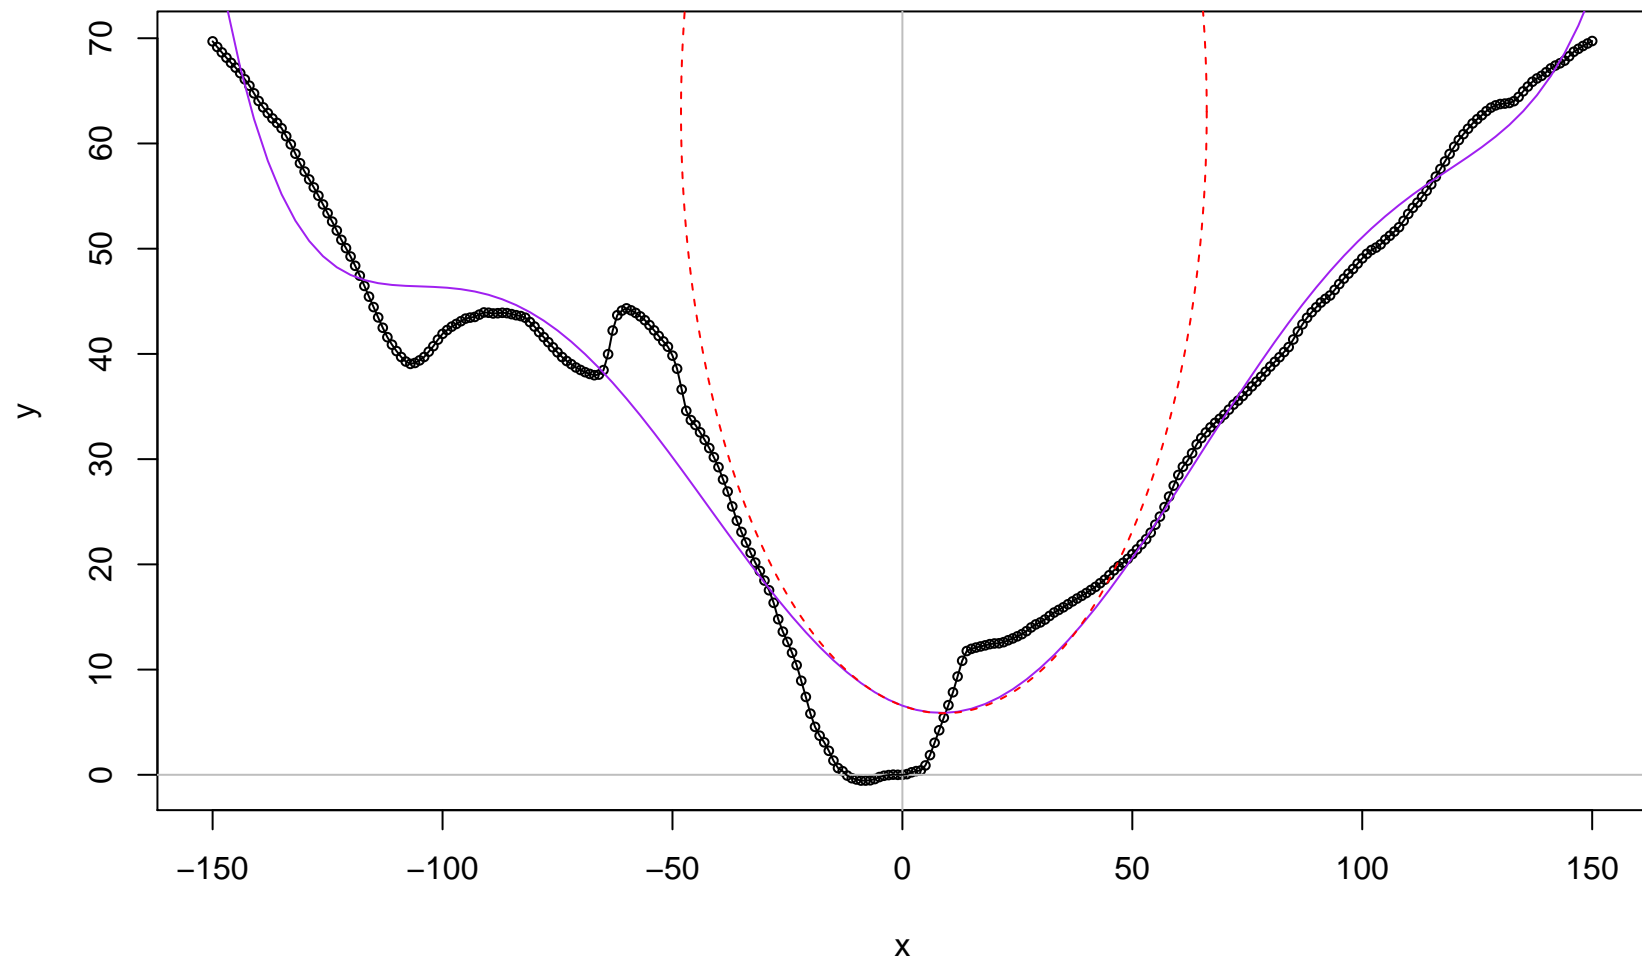



Site 289

$K*100 = -0.6187$

$R^2 = 0.9858$

radius =  $-161.6249$

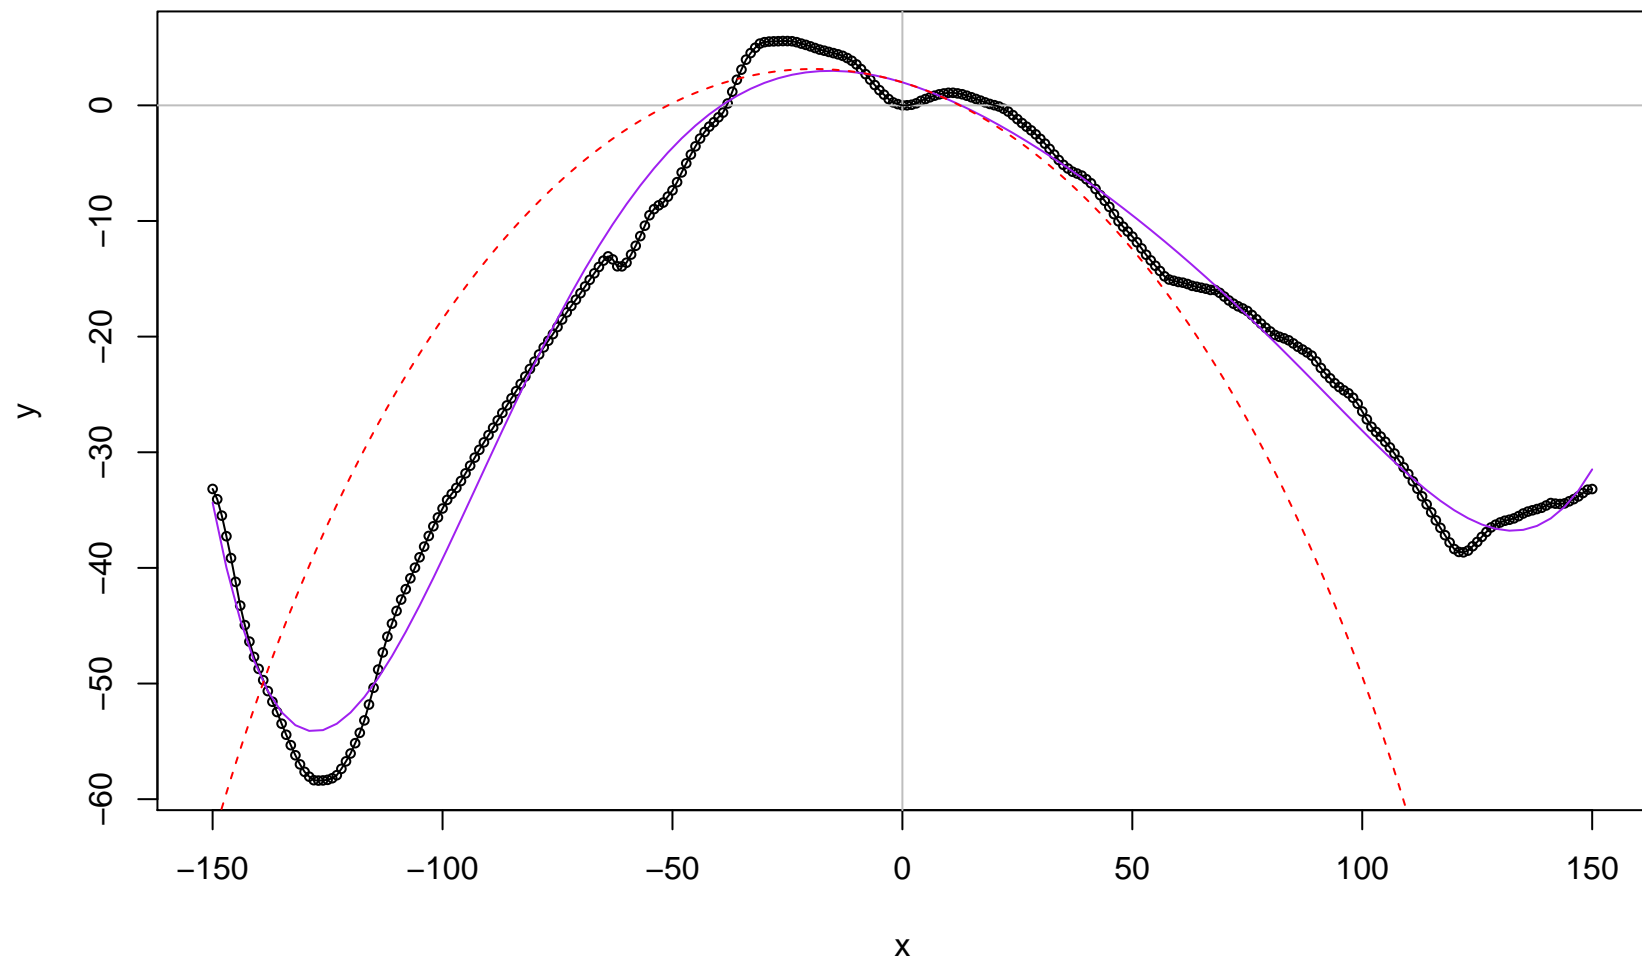

Site 290

$K \cdot 100 = -0.1559$

$R^2 = 0.9841$

radius = -641.4044

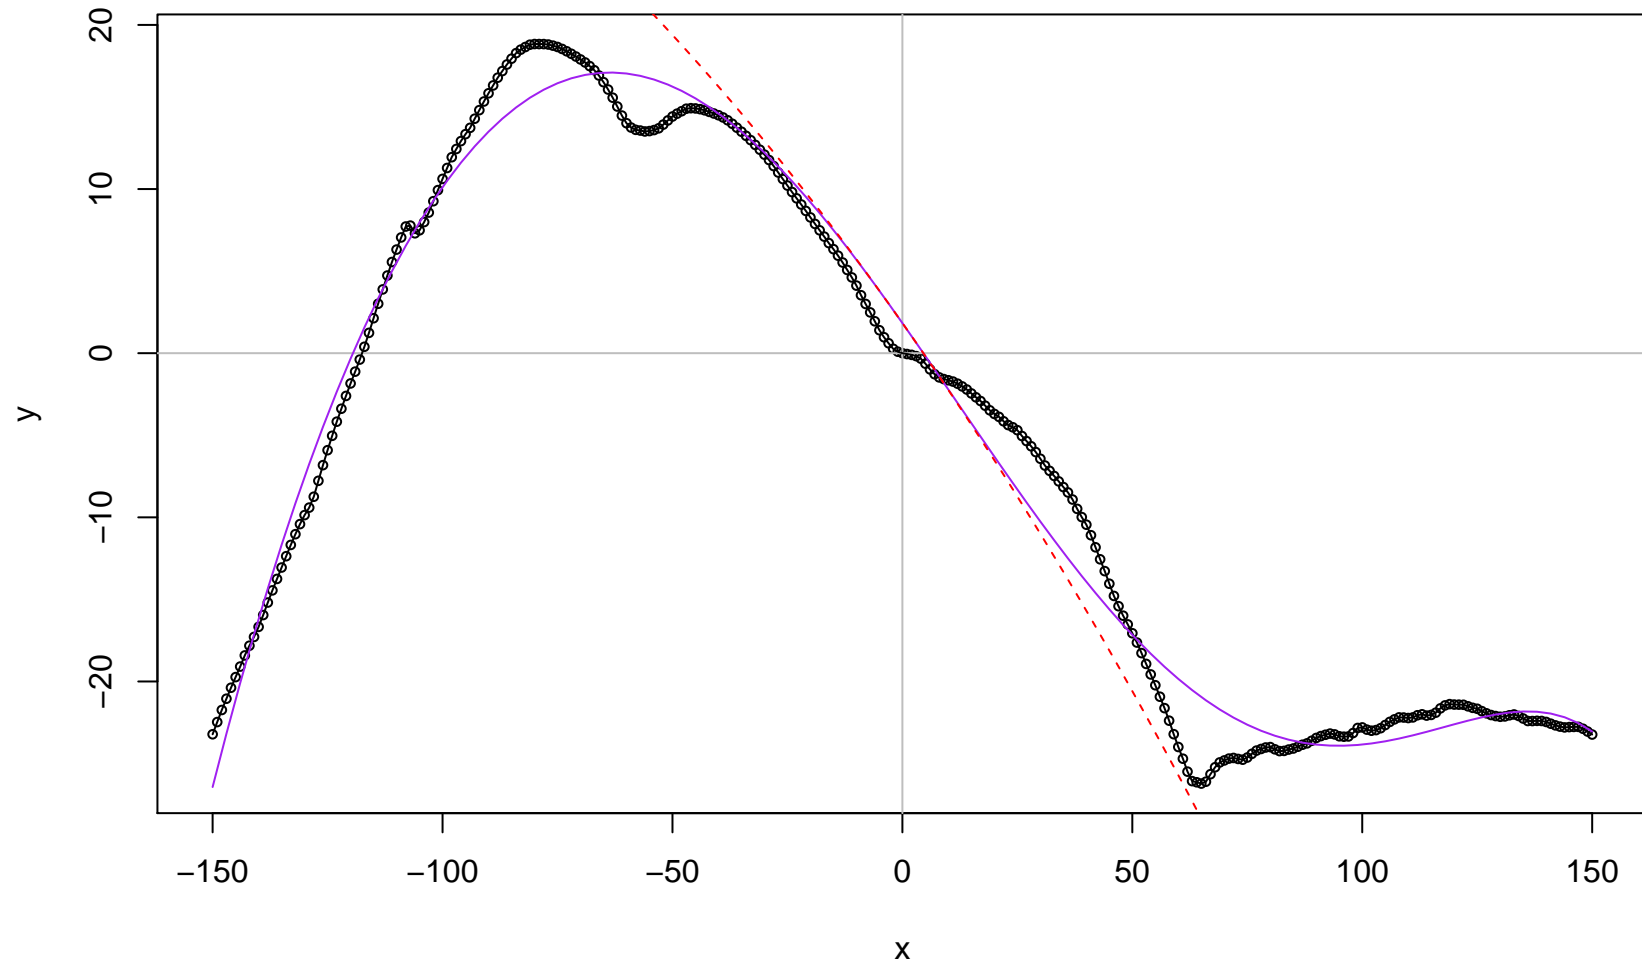

Site 291

$K^*100 = -0.7013$

$R^2 = 0.815$

radius = -142.5998

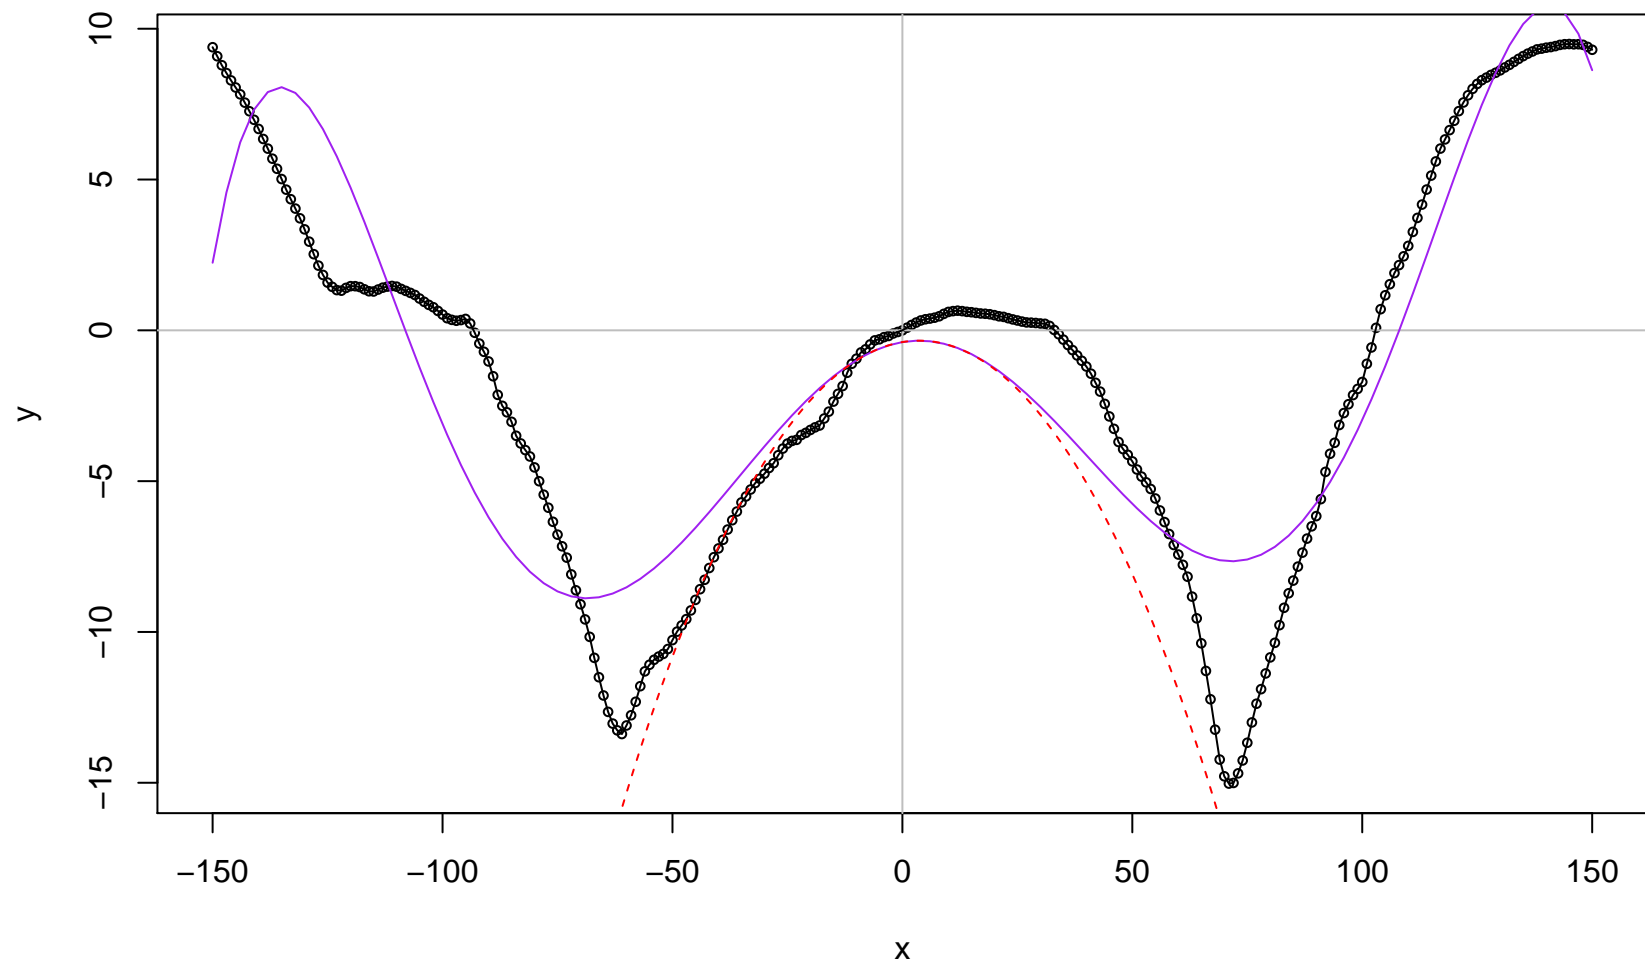

Site 292

$K \cdot 100 = -0.6161$

$R^2 = 0.9963$

radius =  $-162.3137$

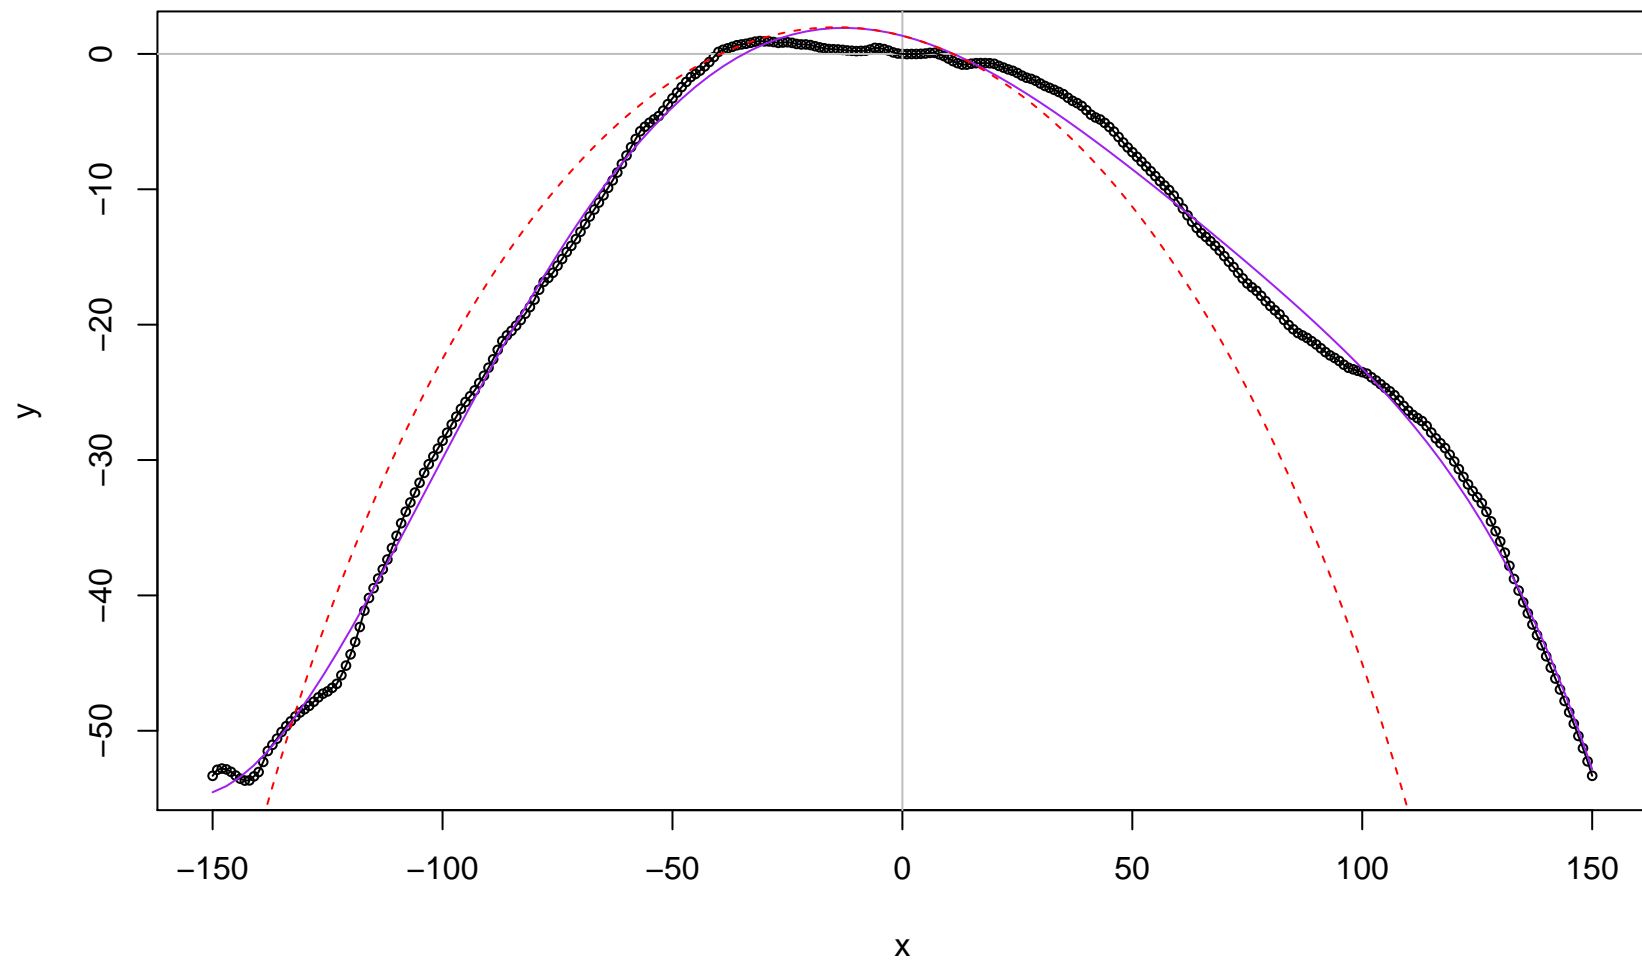

Site 293

$K*100= 0.1026$

$R^2= 0.9114$

radius= 974.5871

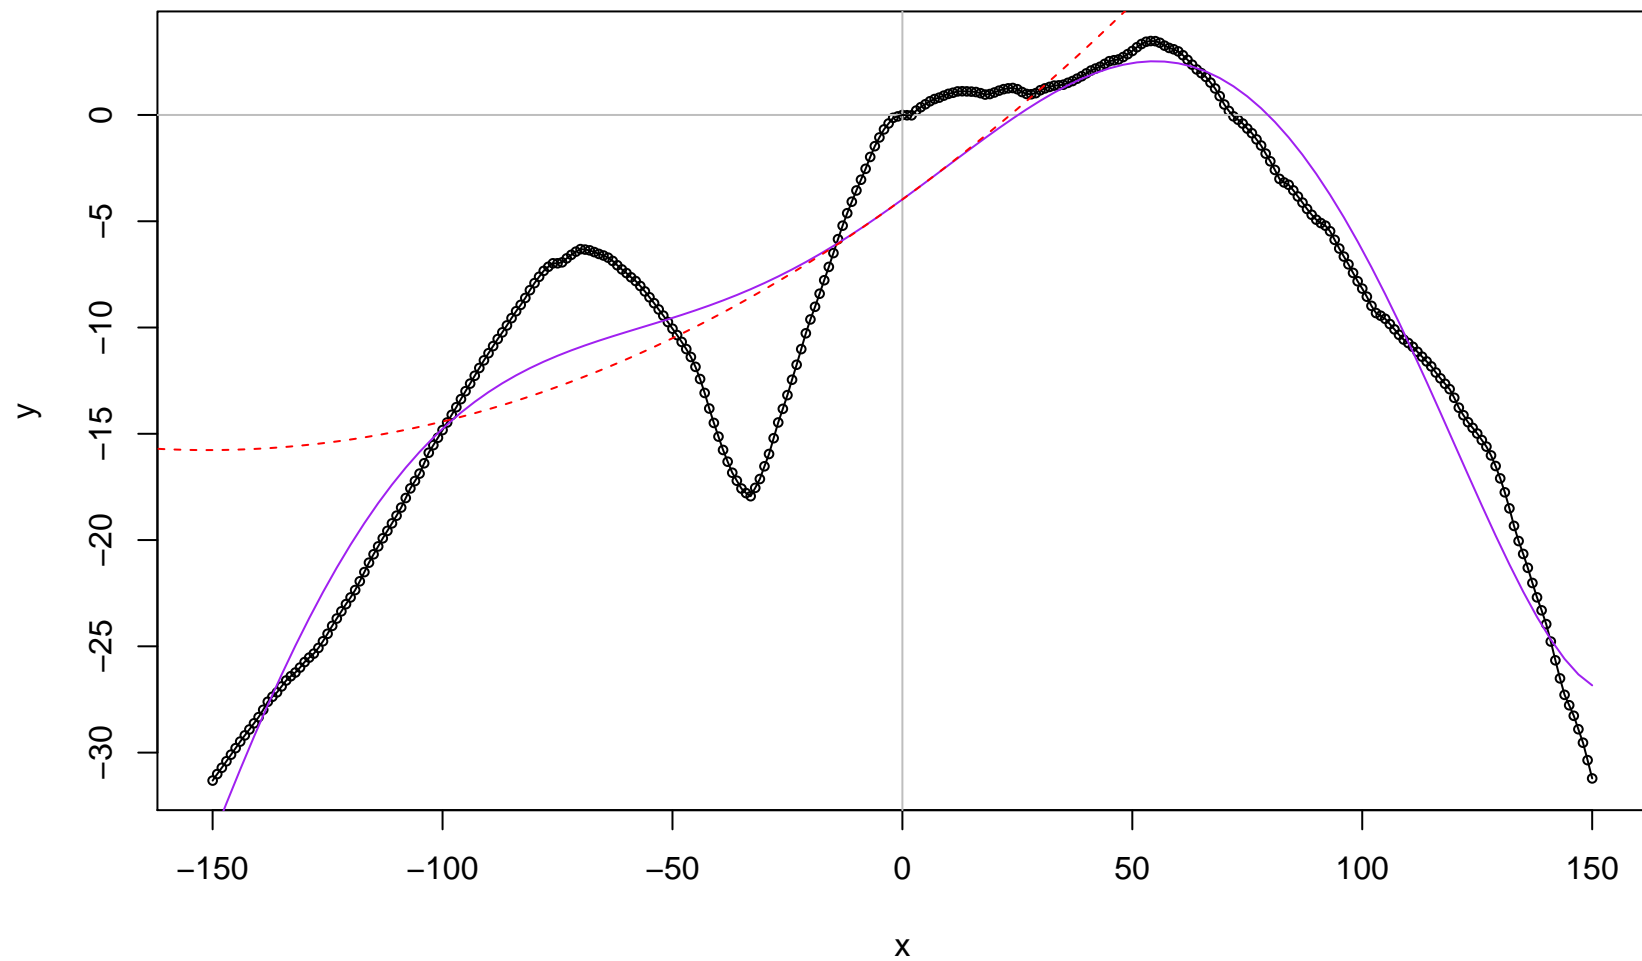

Site 294

$K*100 = -0.7745$

$R^2 = 0.8779$

radius =  $-129.1103$

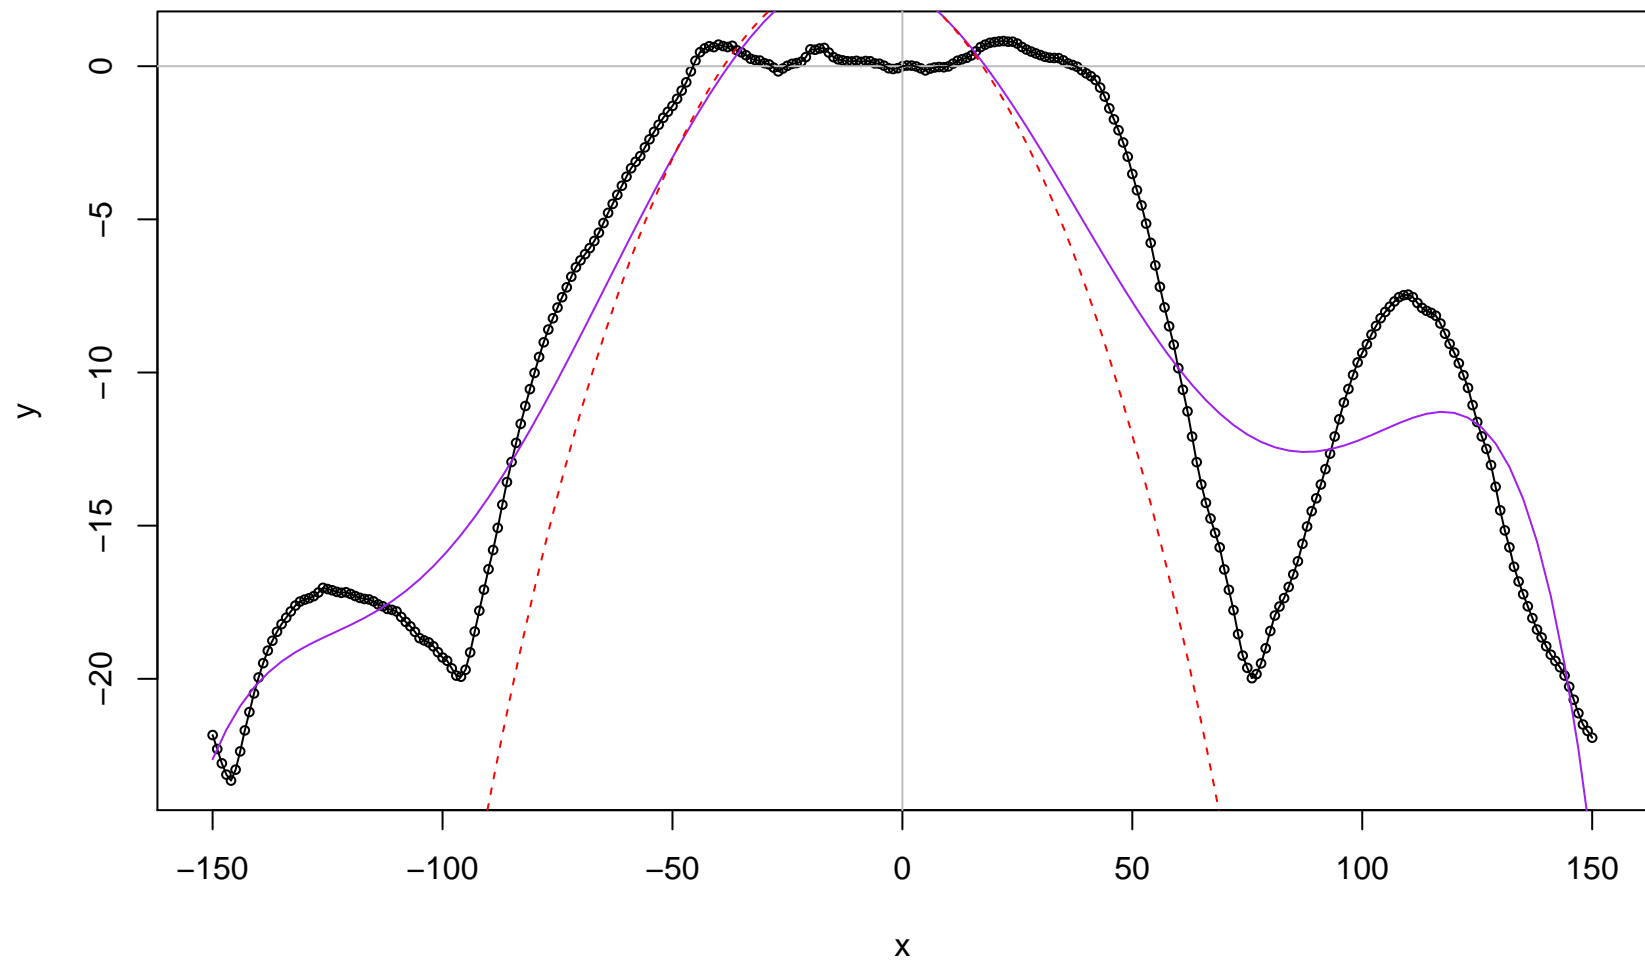

Site 295

$K*100= 0.5544$

$R^2= 0.9331$

radius= 180.3639

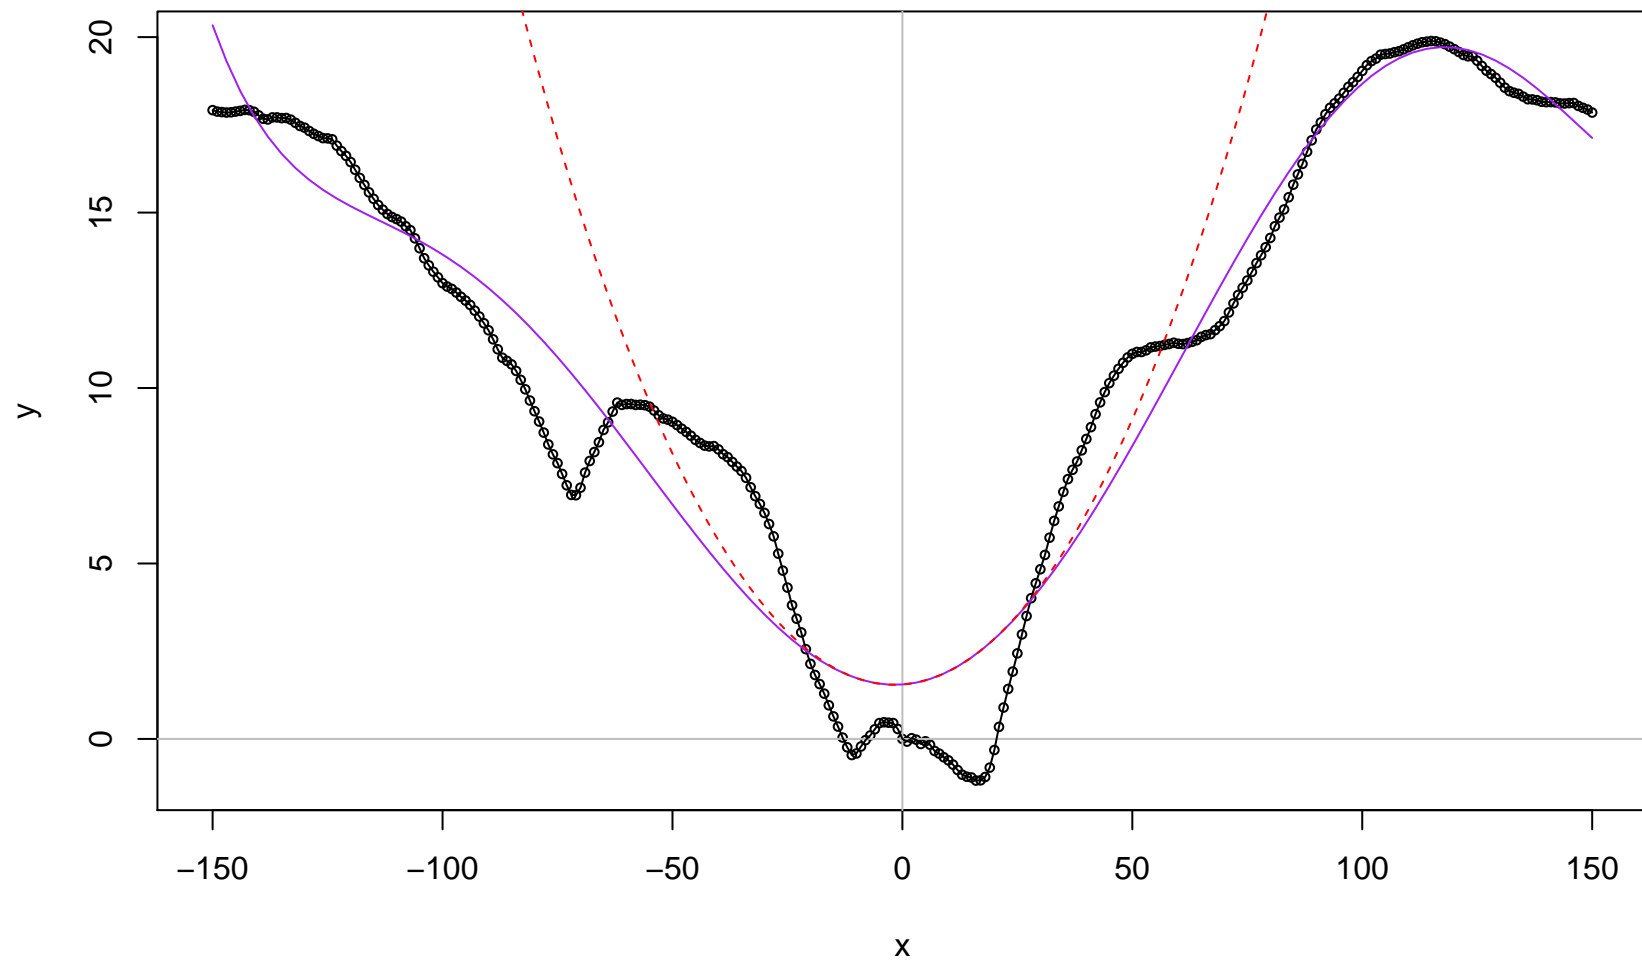

Site 296

$K*100 = -0.2694$

$R^2 = 0.8783$

radius = -371.2179

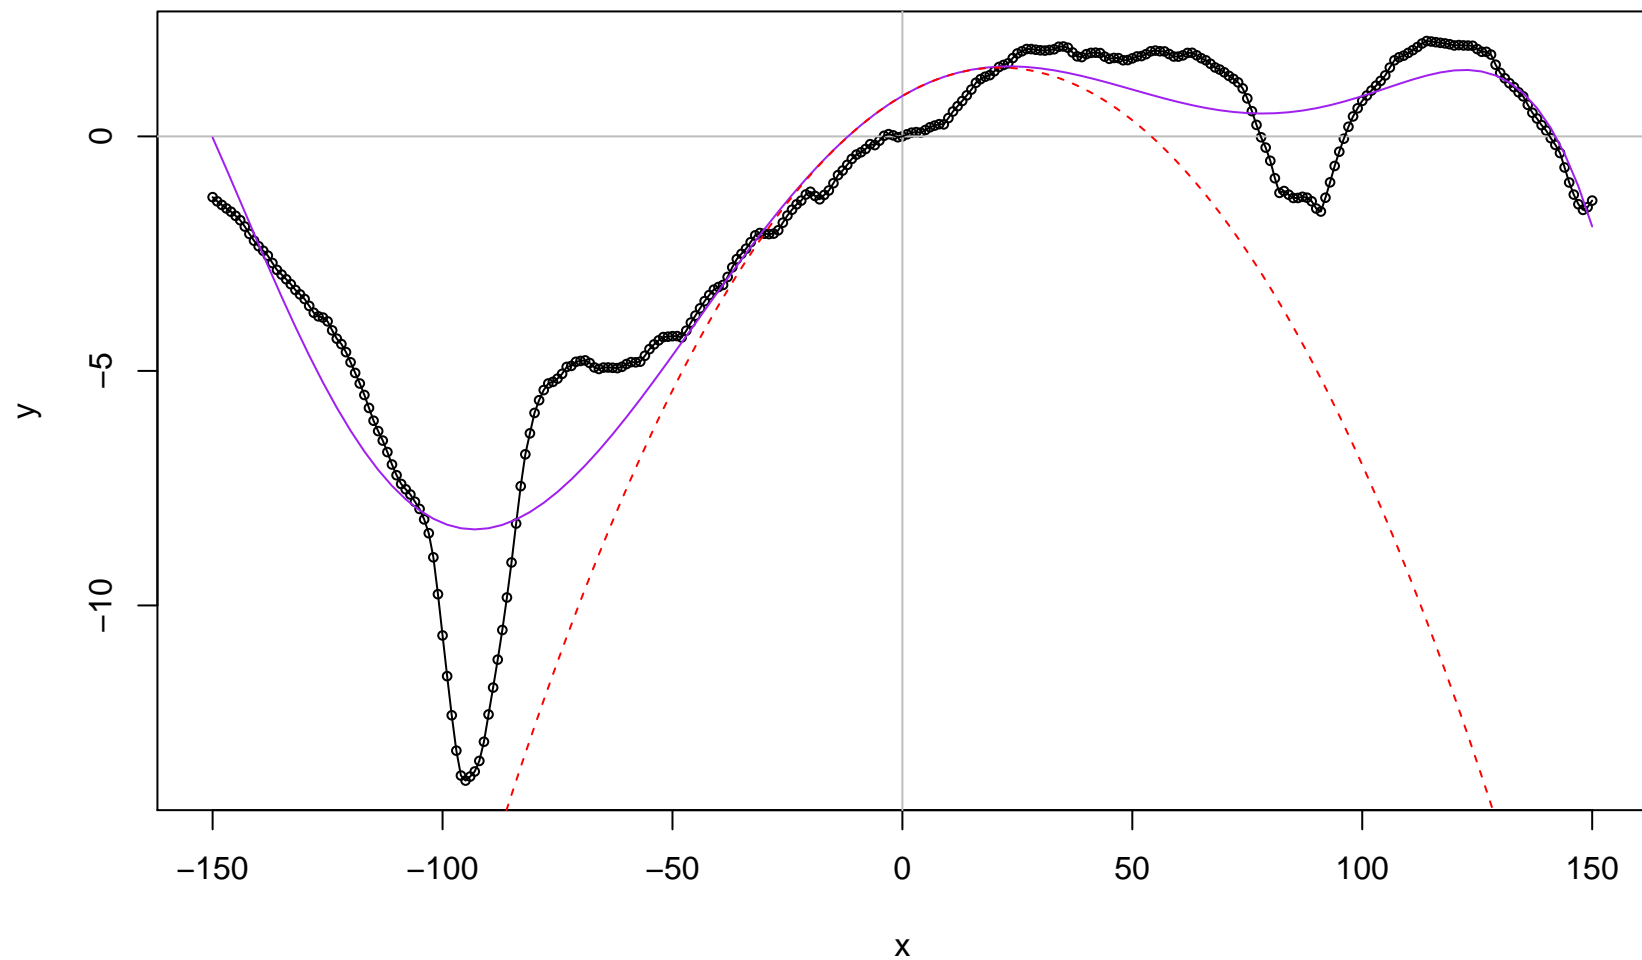



Site 297

$K*100= 0.3662$

$R2= 0.7861$

radius= 273.0811

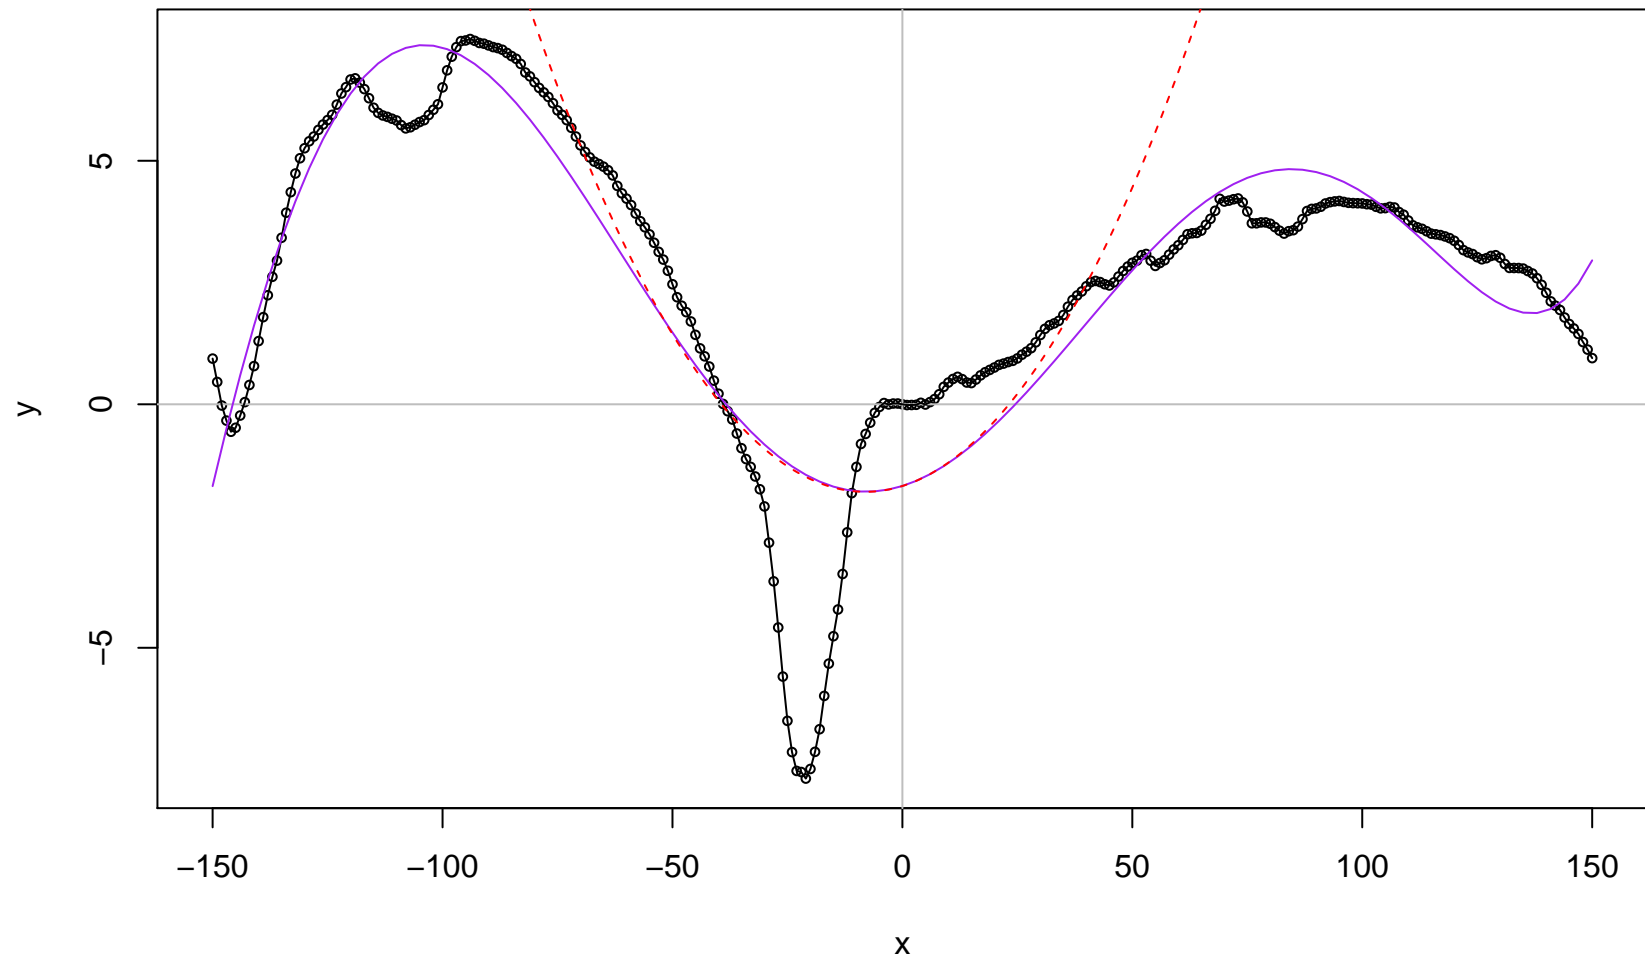

Site 298

$K^*100 = -0.2633$

$R^2 = 0.5567$

radius =  $-379.823$

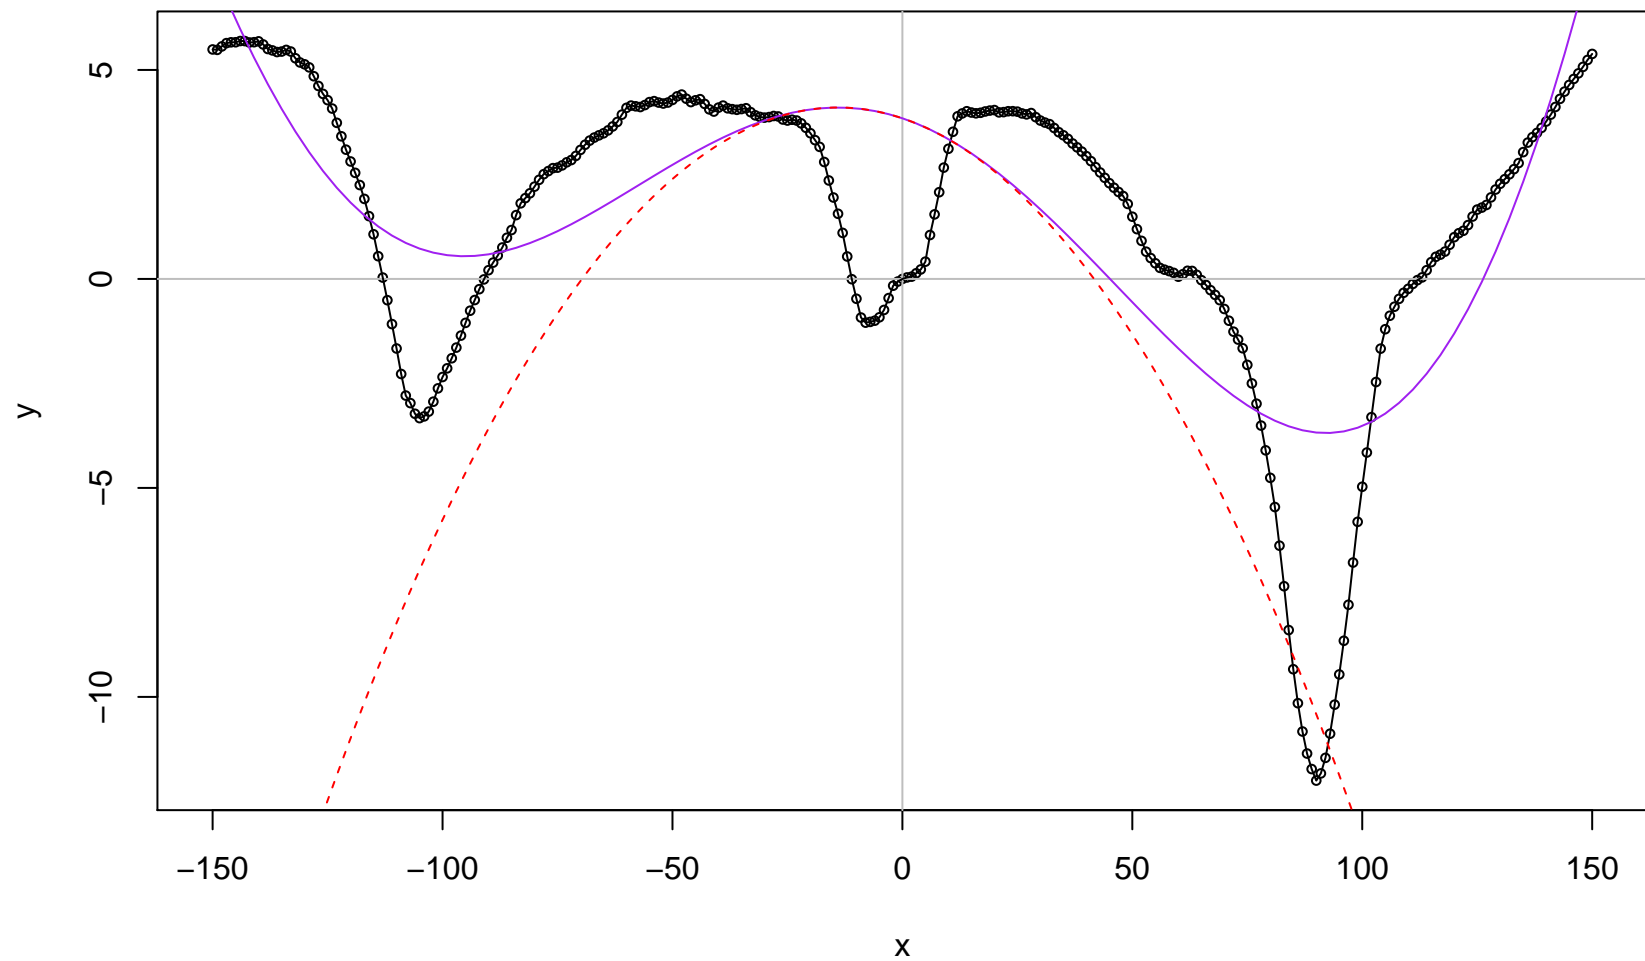

Site 299

$K*100 = -0.0629$

$R^2 = 0.9091$

radius =  $-1589.9732$

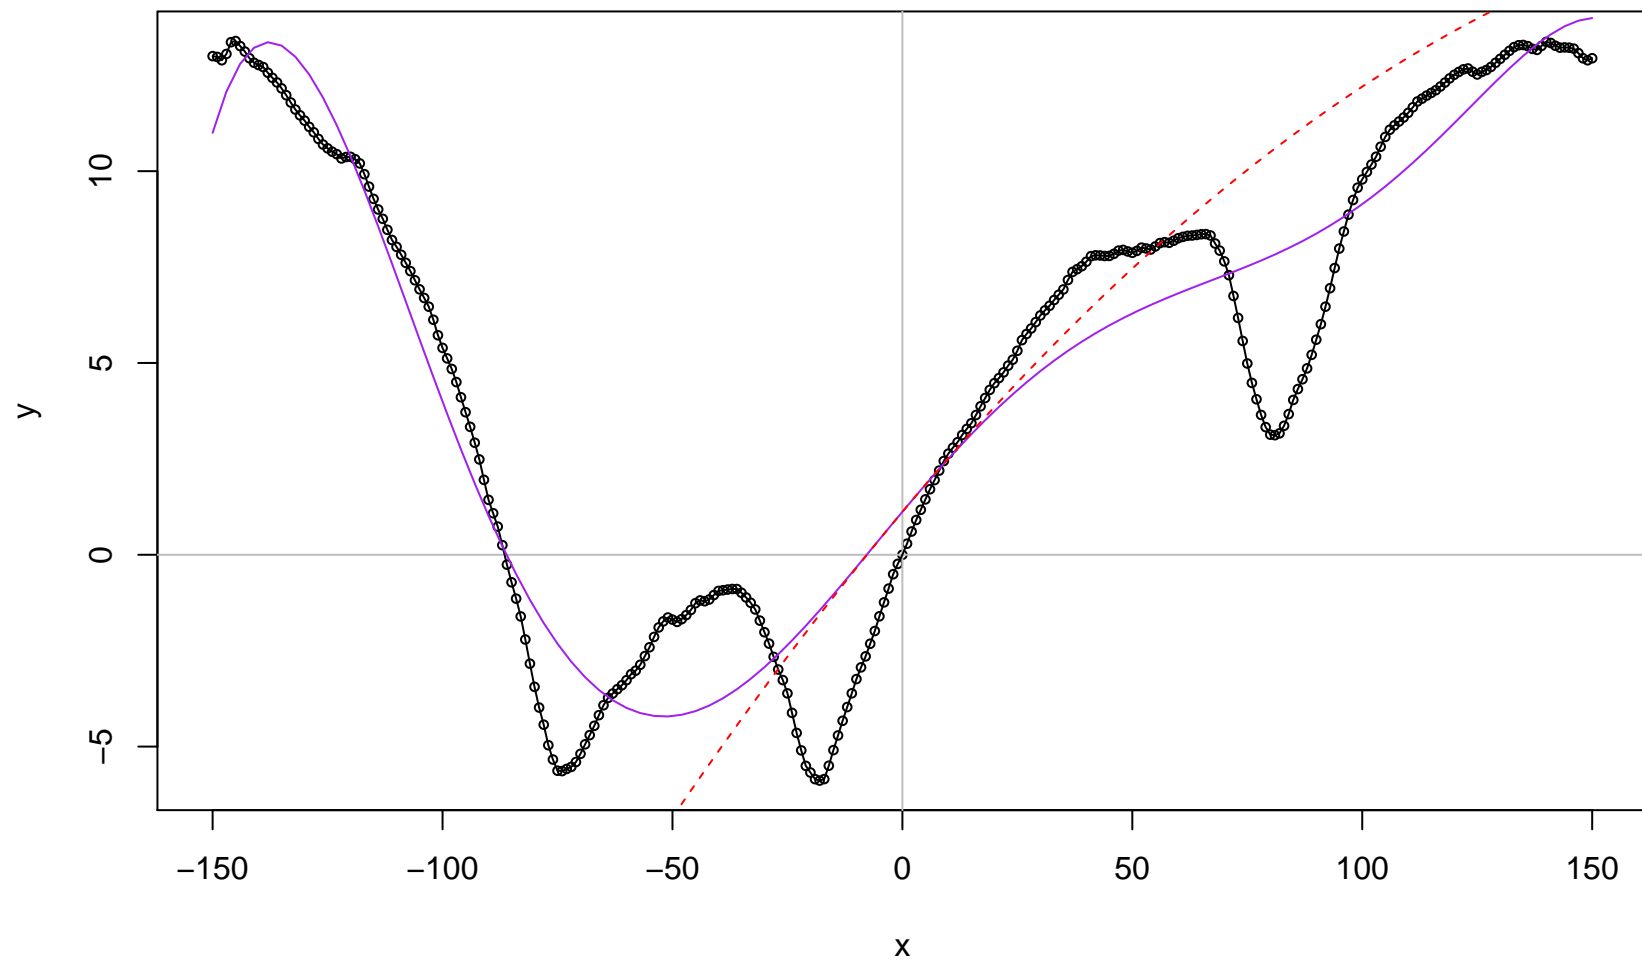

Site 300

$K \cdot 100 = 0.3104$

$R^2 = 0.8391$

radius= 322.1887

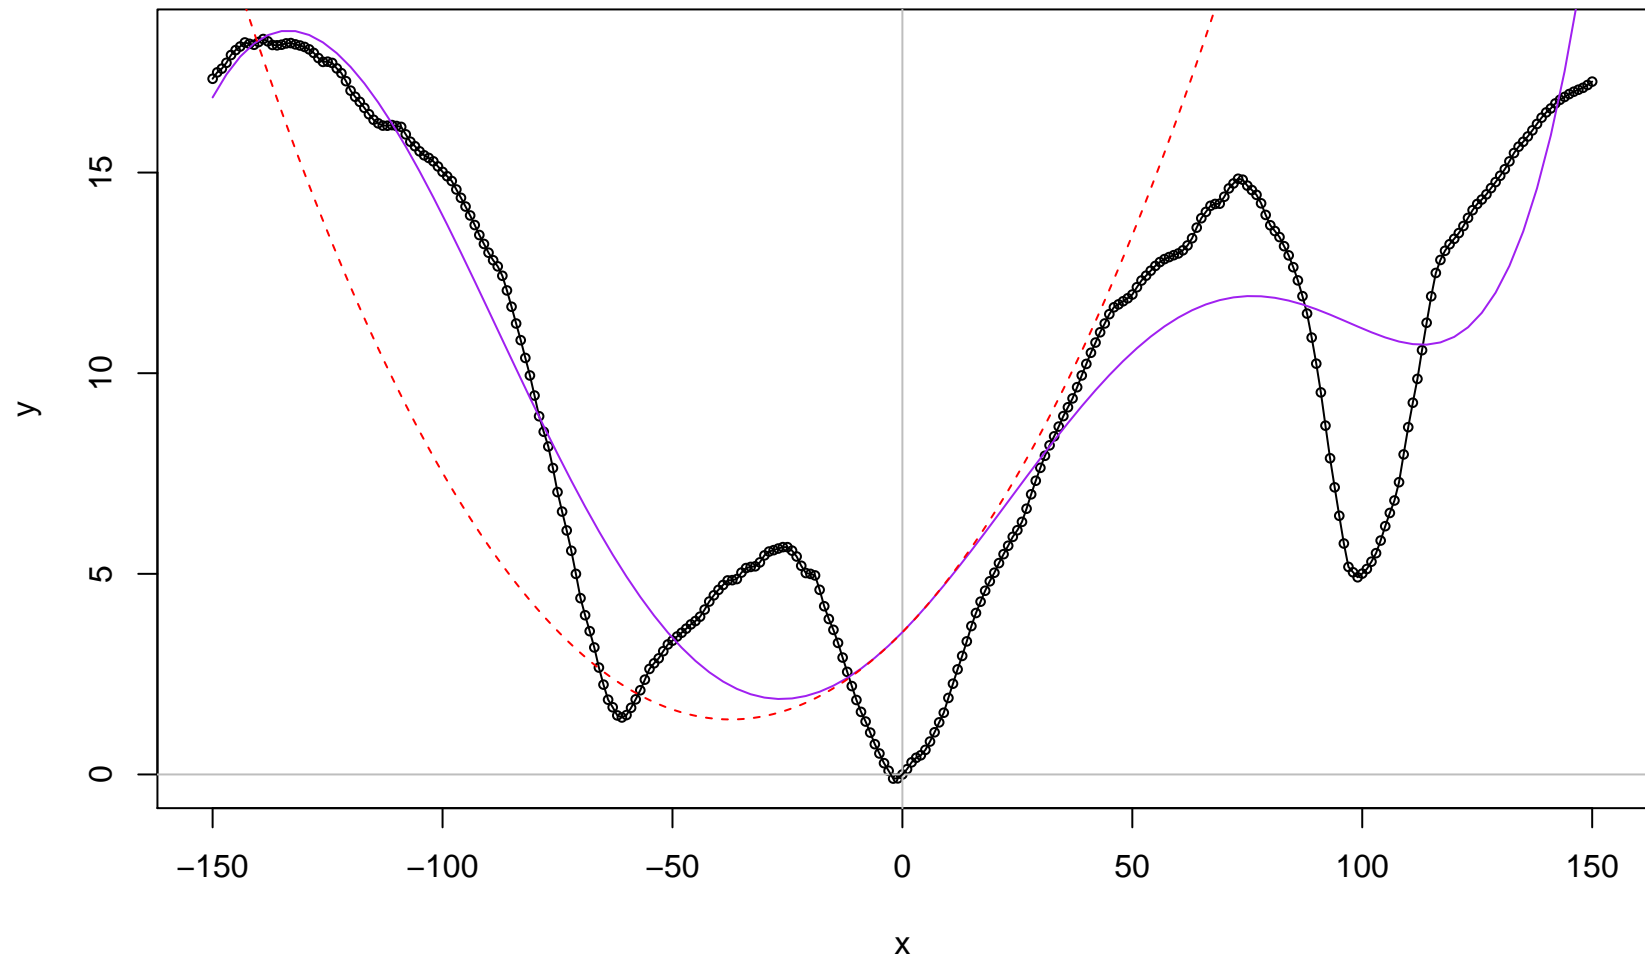

Site 301

$K \cdot 100 = 1.0172$

$R^2 = 0.871$

radius = 98.3119

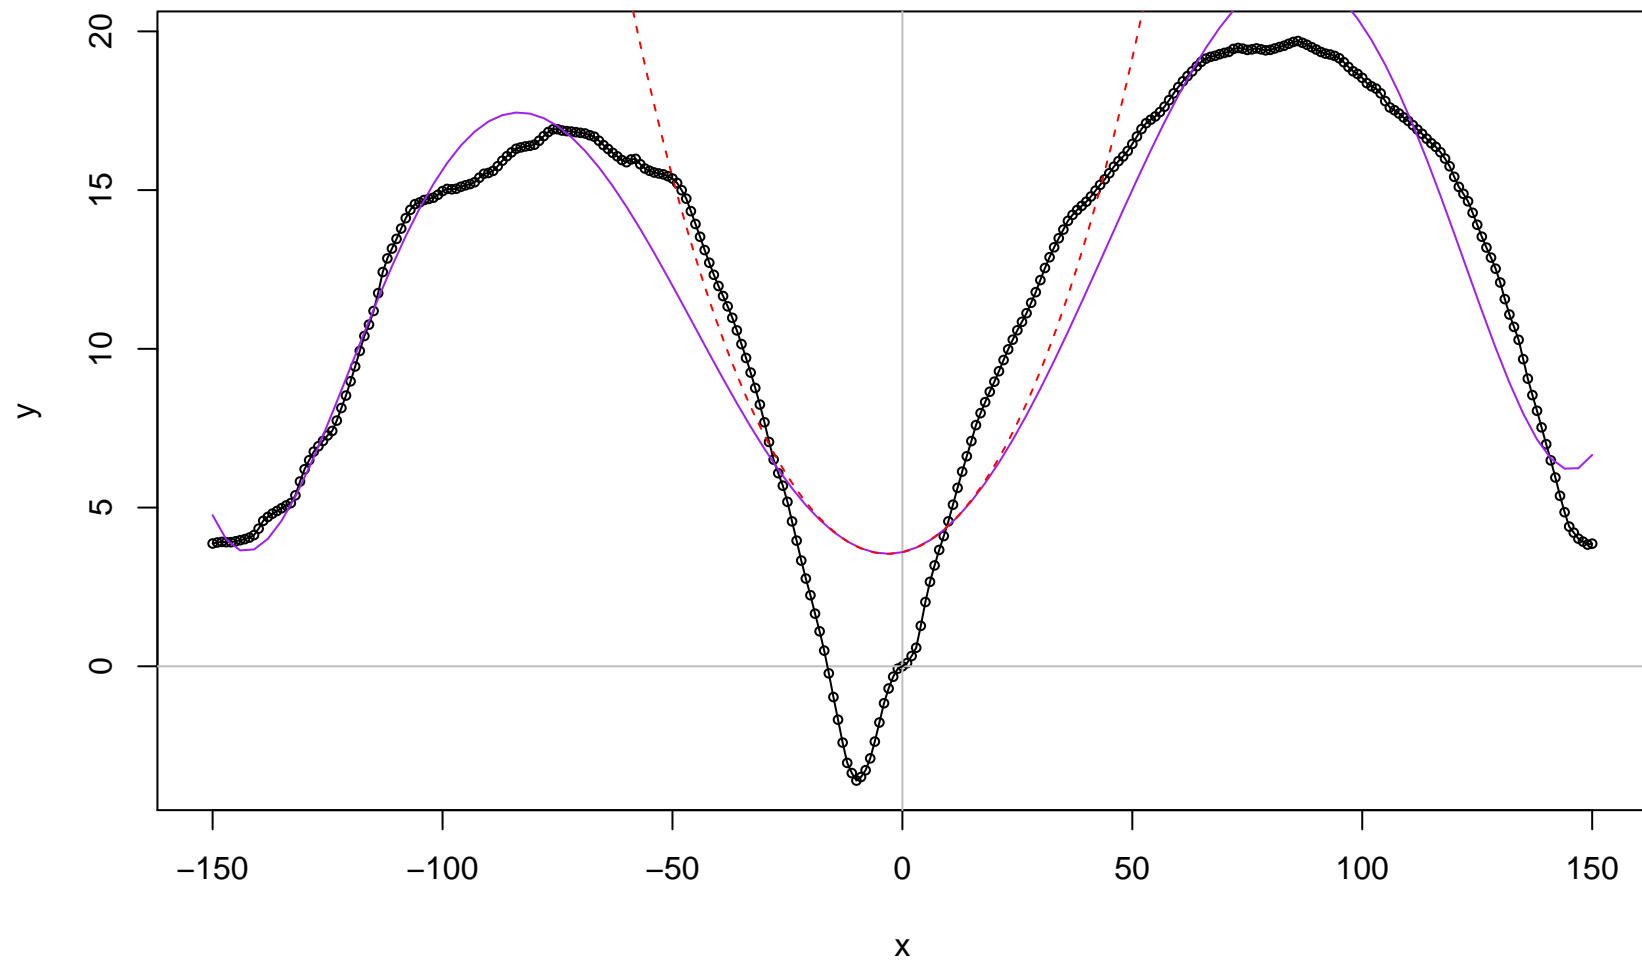

Site 302

$K*100 = -0.1105$

$R^2 = 0.956$

radius =  $-905.1896$

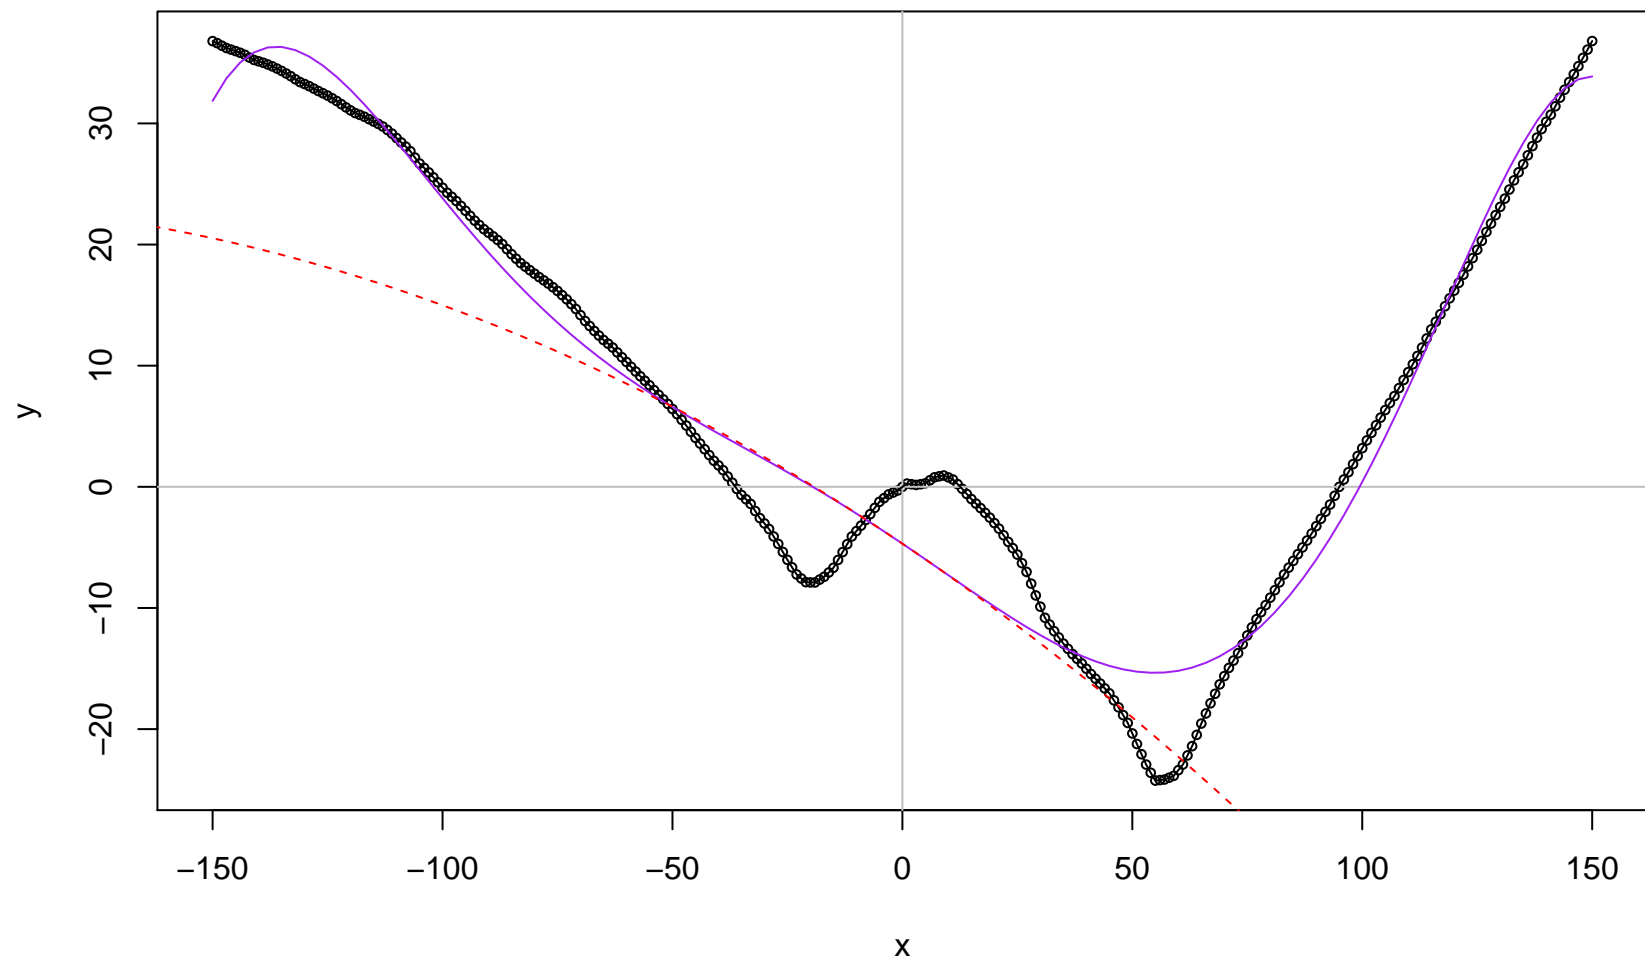

Site 303

$K \cdot 100 = 0.1679$

$R^2 = 0.9579$

radius= 595.5813

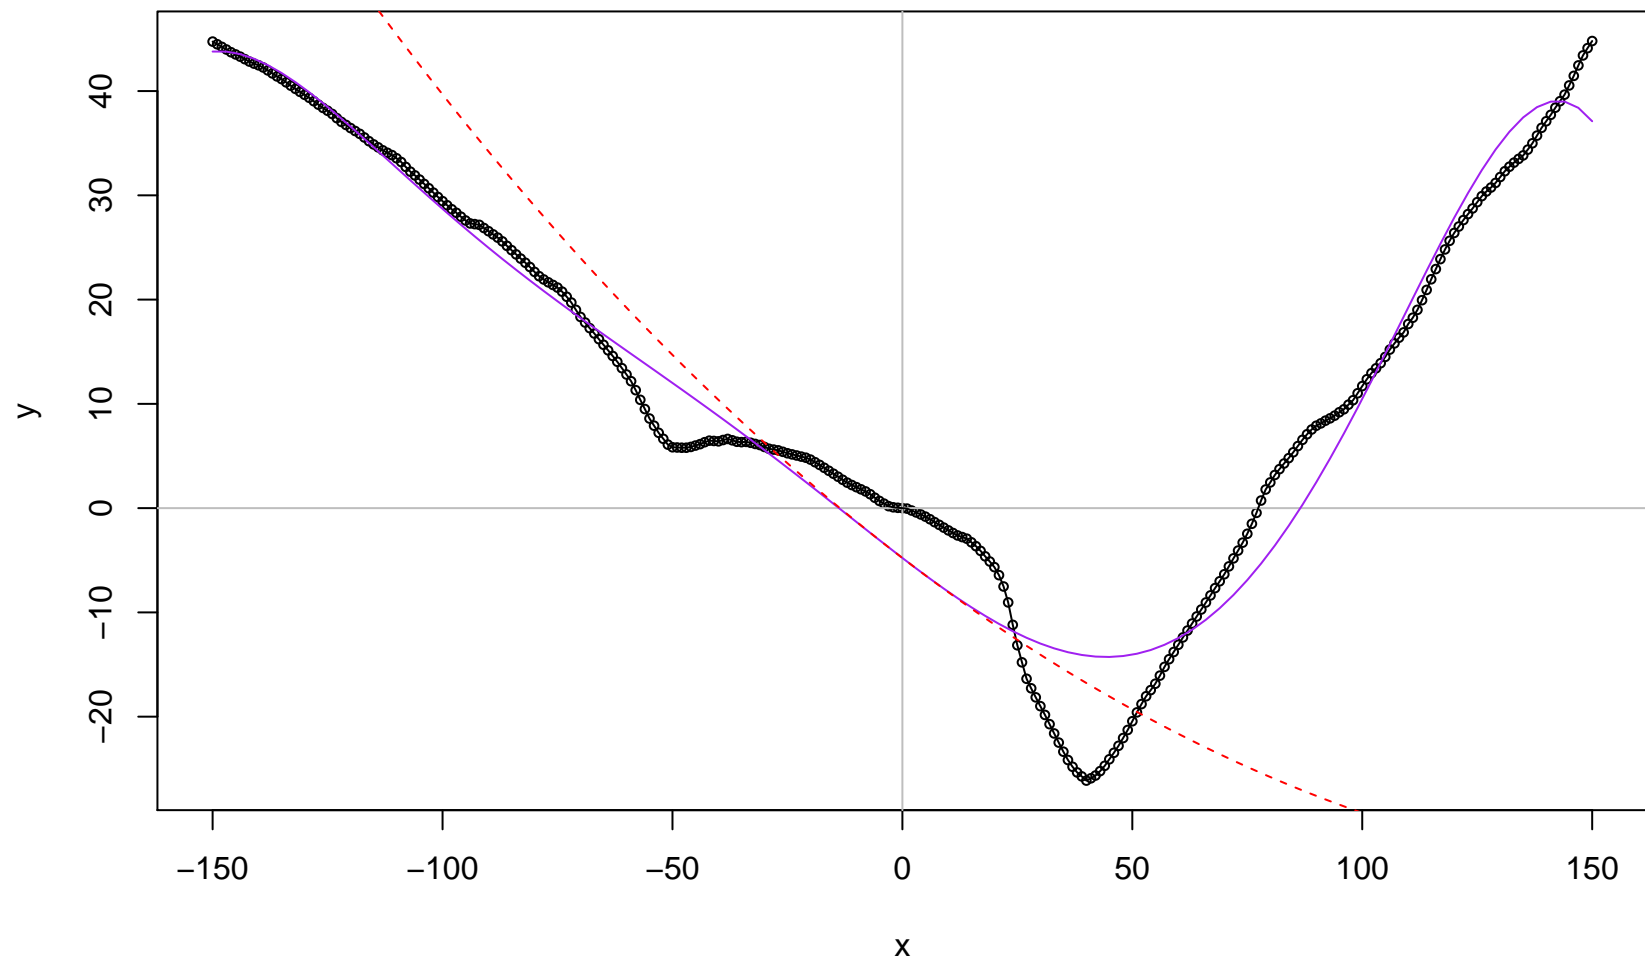

Site 304

$K*100 = -0.0097$

$R^2 = 0.9731$

radius =  $-10359.9026$

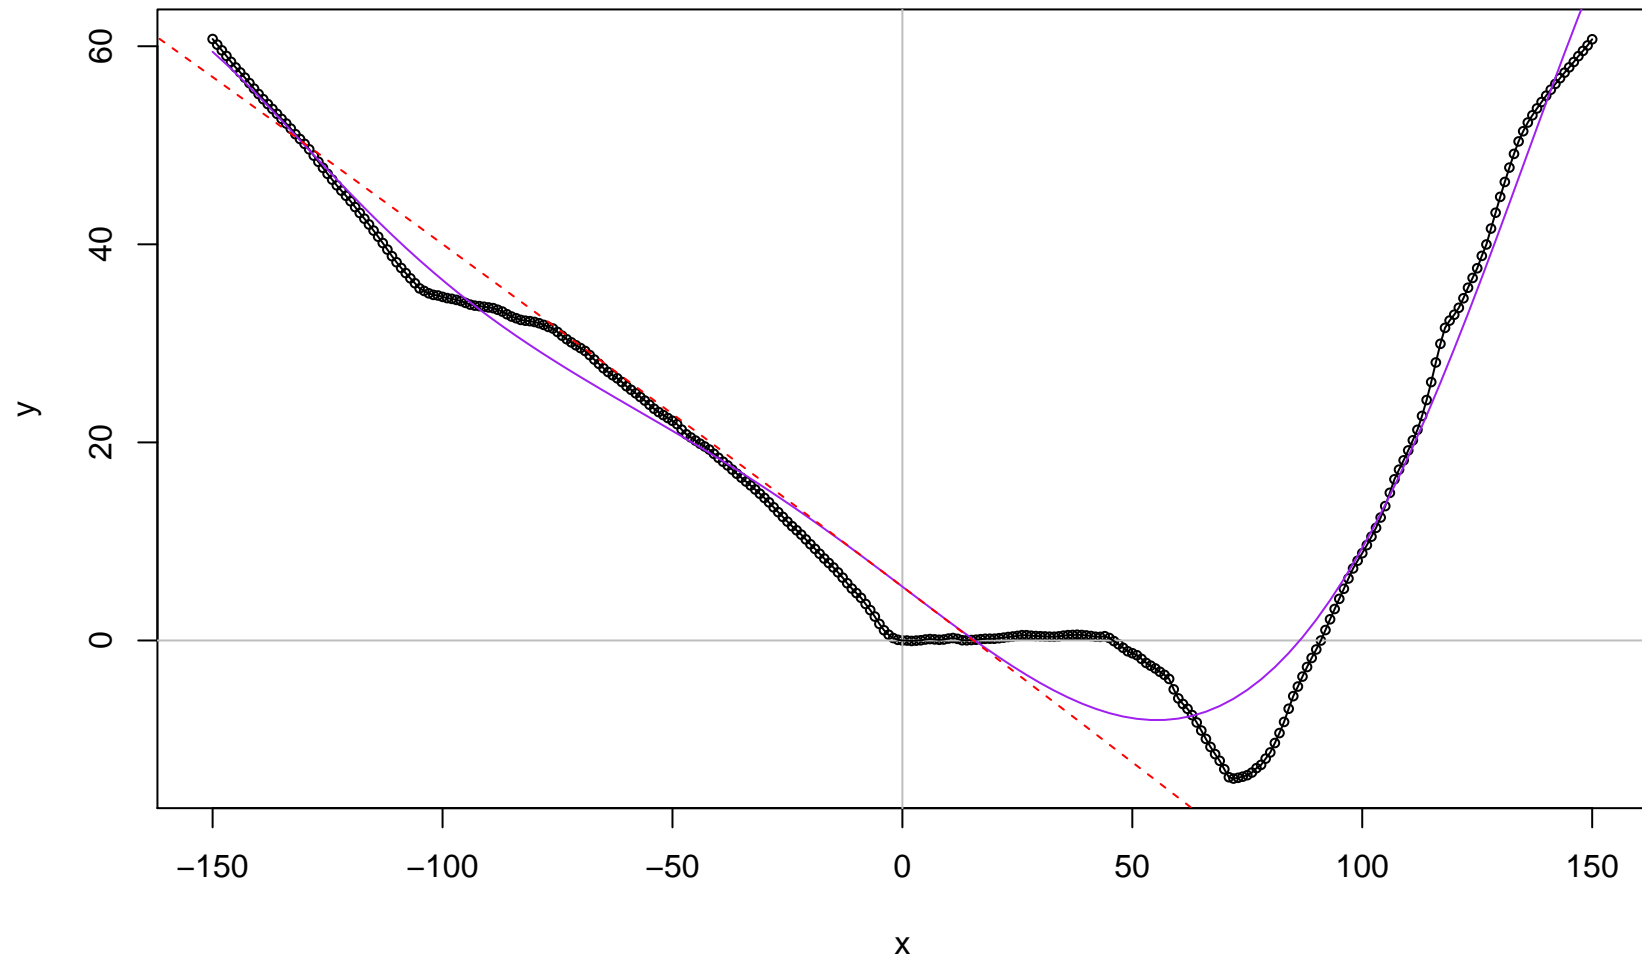



Site 305

$K*100= 0.352$

$R^2= 0.9421$

radius= 284.0733

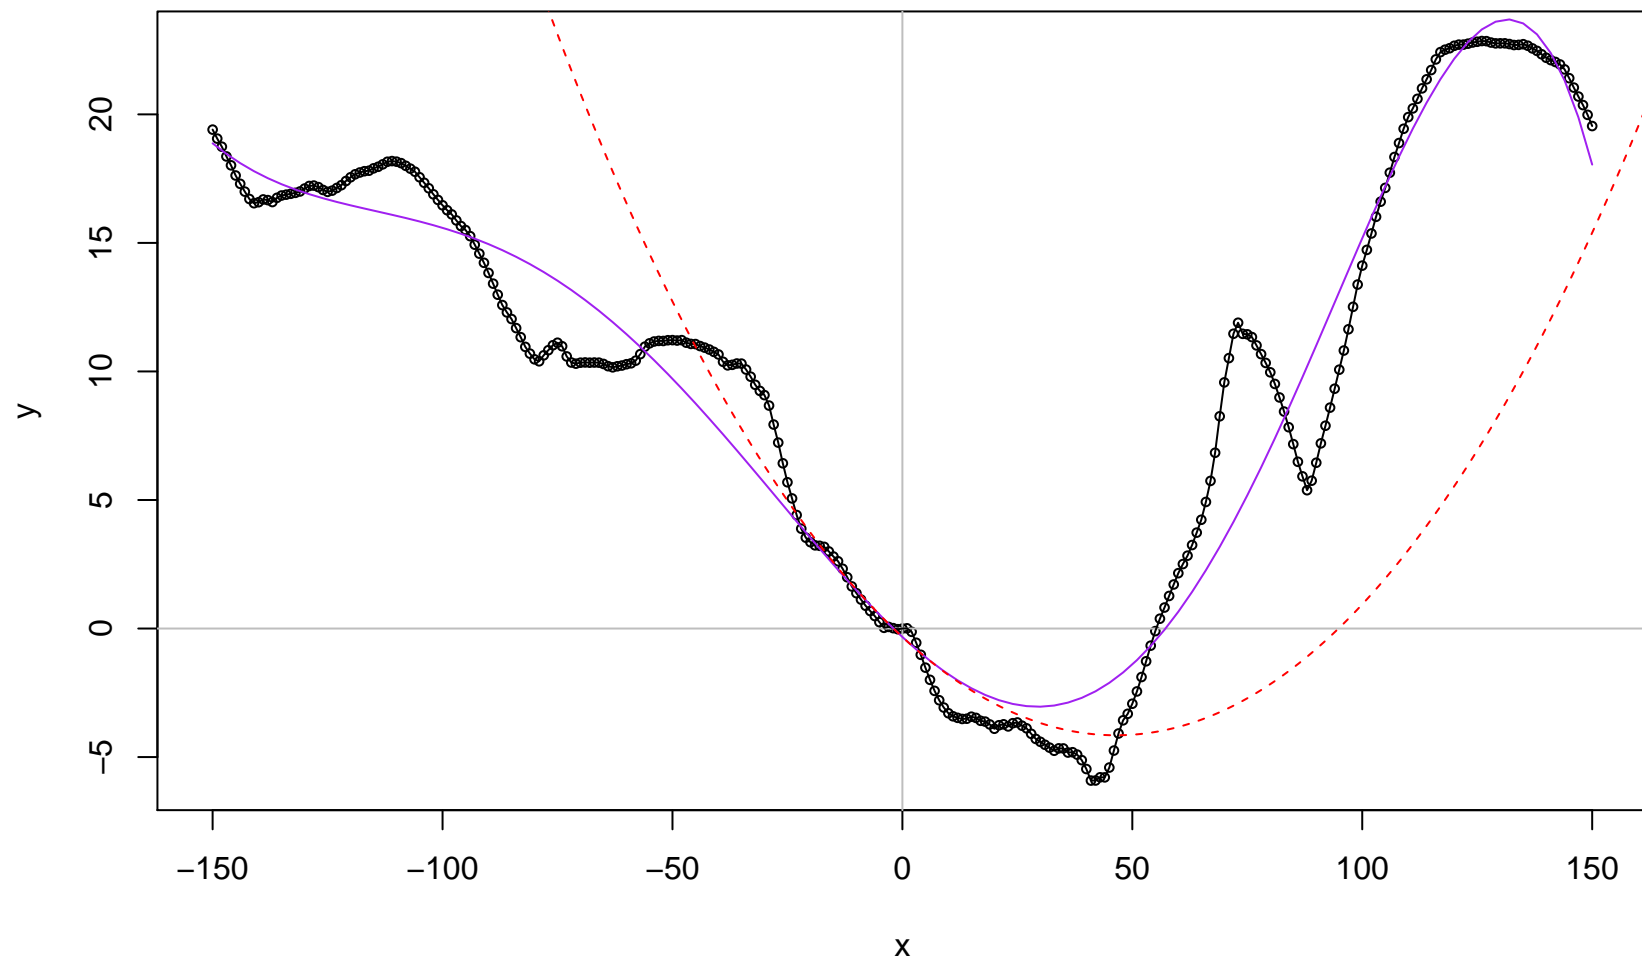

Site 306

$K \cdot 100 = 0.2308$

$R^2 = 0.8852$

radius= 433.1982

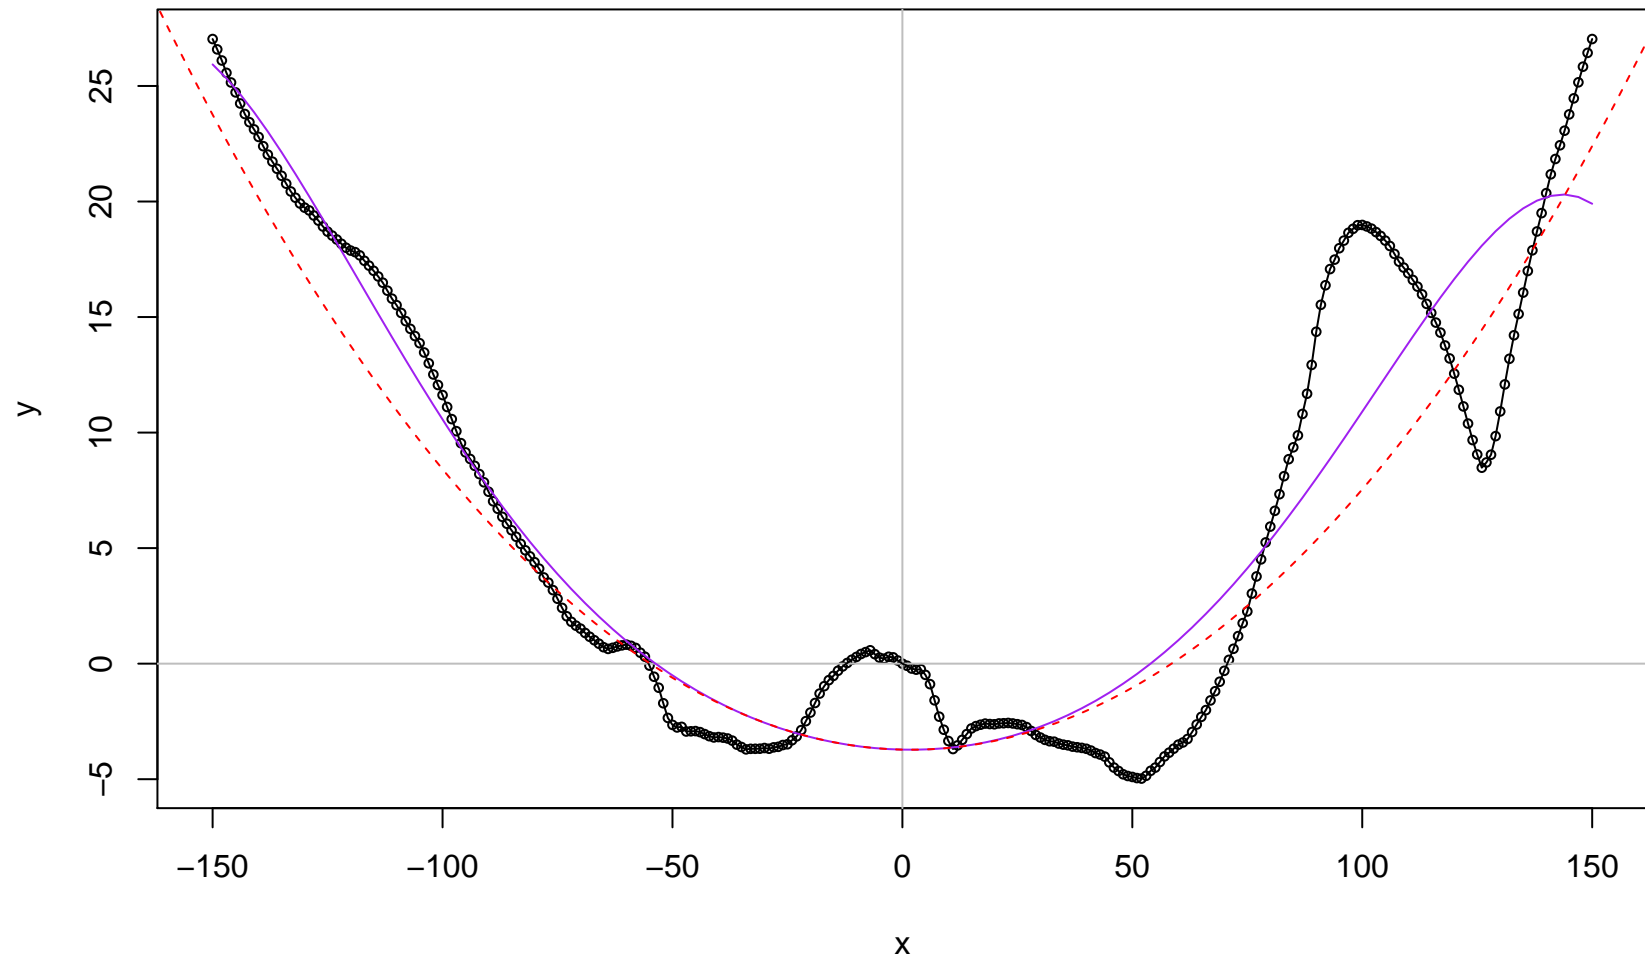

Site 307

$K*100 = -0.3542$

$R^2 = 0.6995$

radius = -282.2883

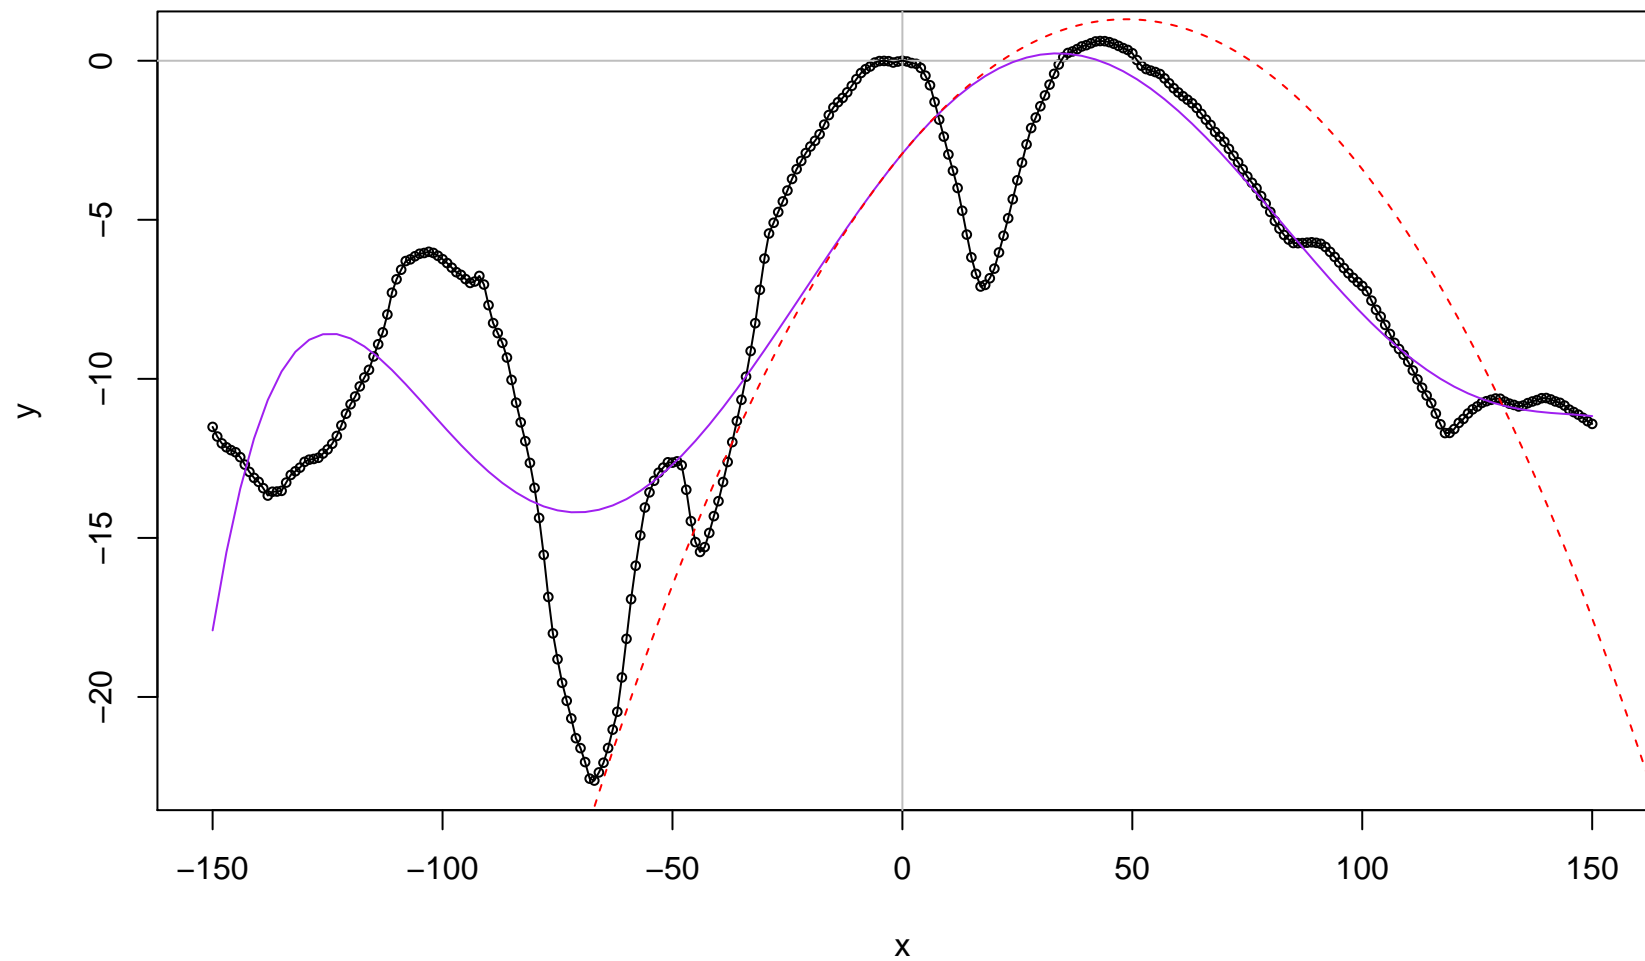

Site 308

$K \cdot 100 = -0.1513$

$R^2 = 0.8755$

radius = -660.8394

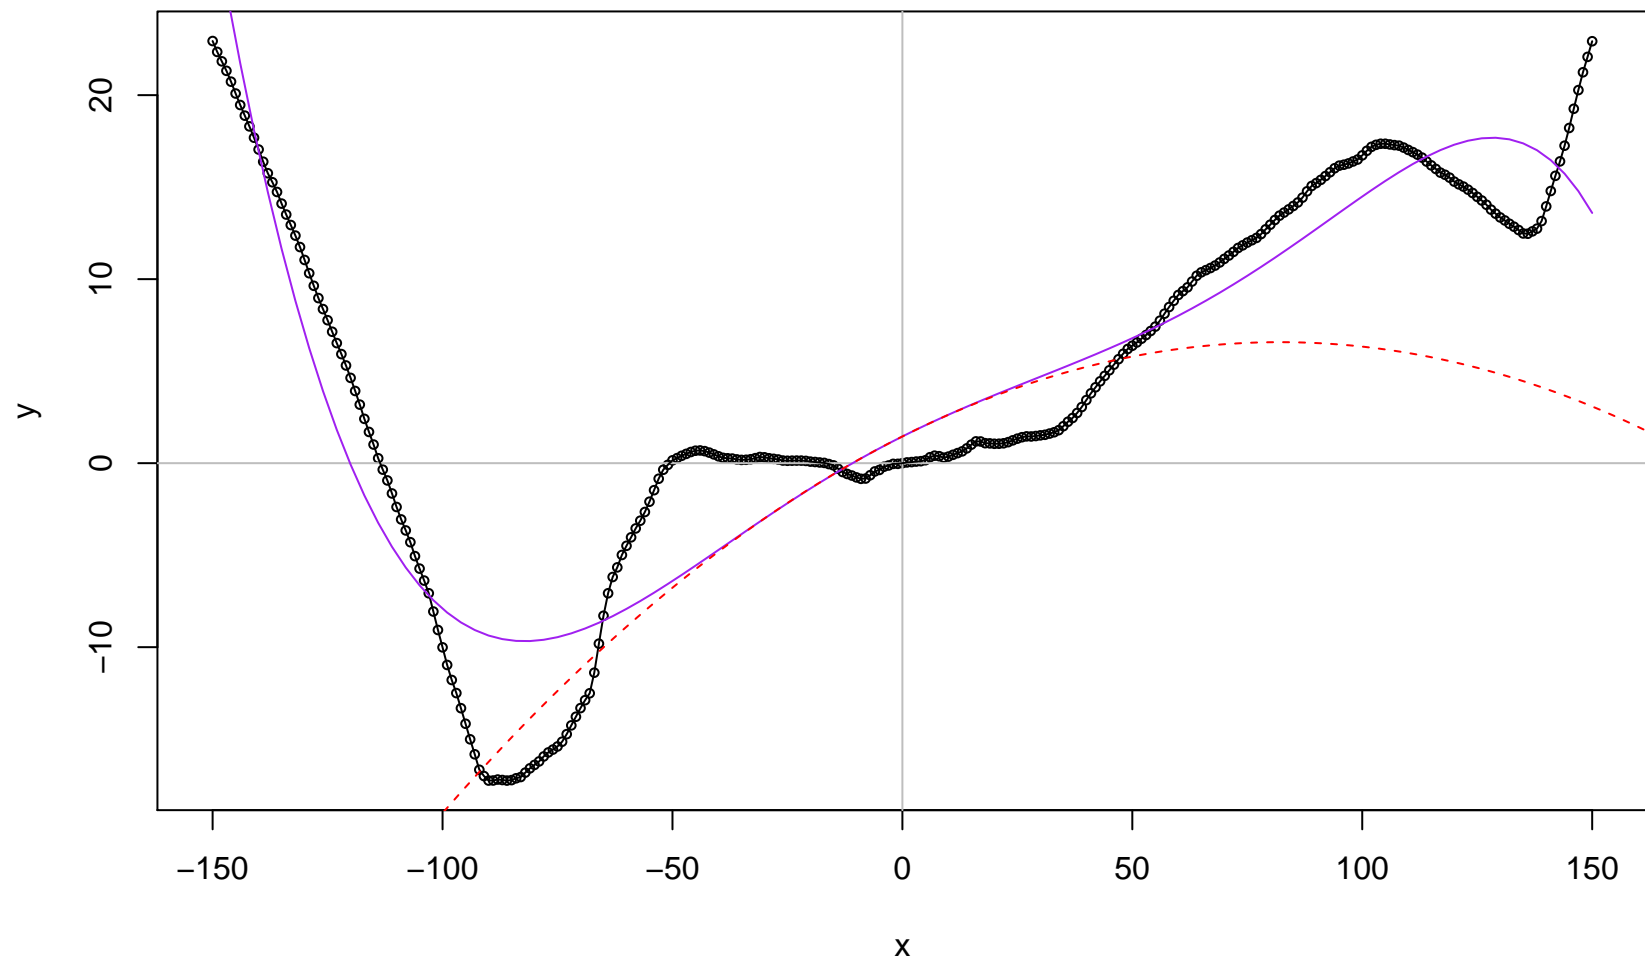

Site 309

$K \cdot 100 = 0.2097$

$R^2 = 0.8556$

radius= 476.9101

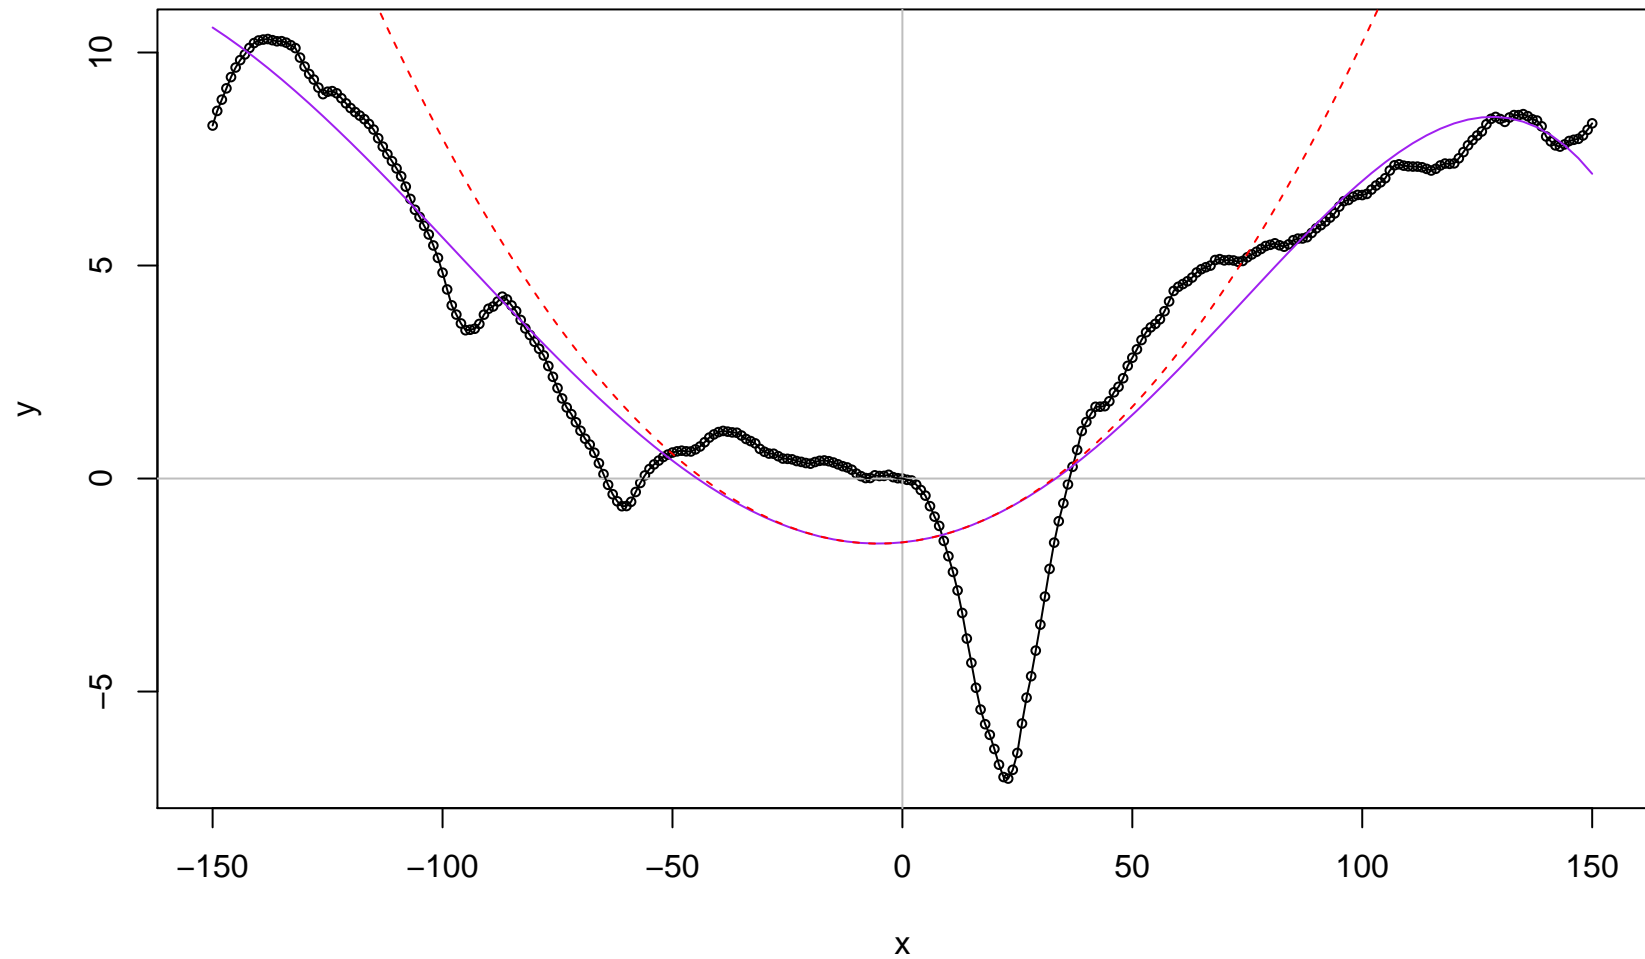

Site 310

$K*100= 0.1775$

$R^2= 0.8152$

radius= 563.5162

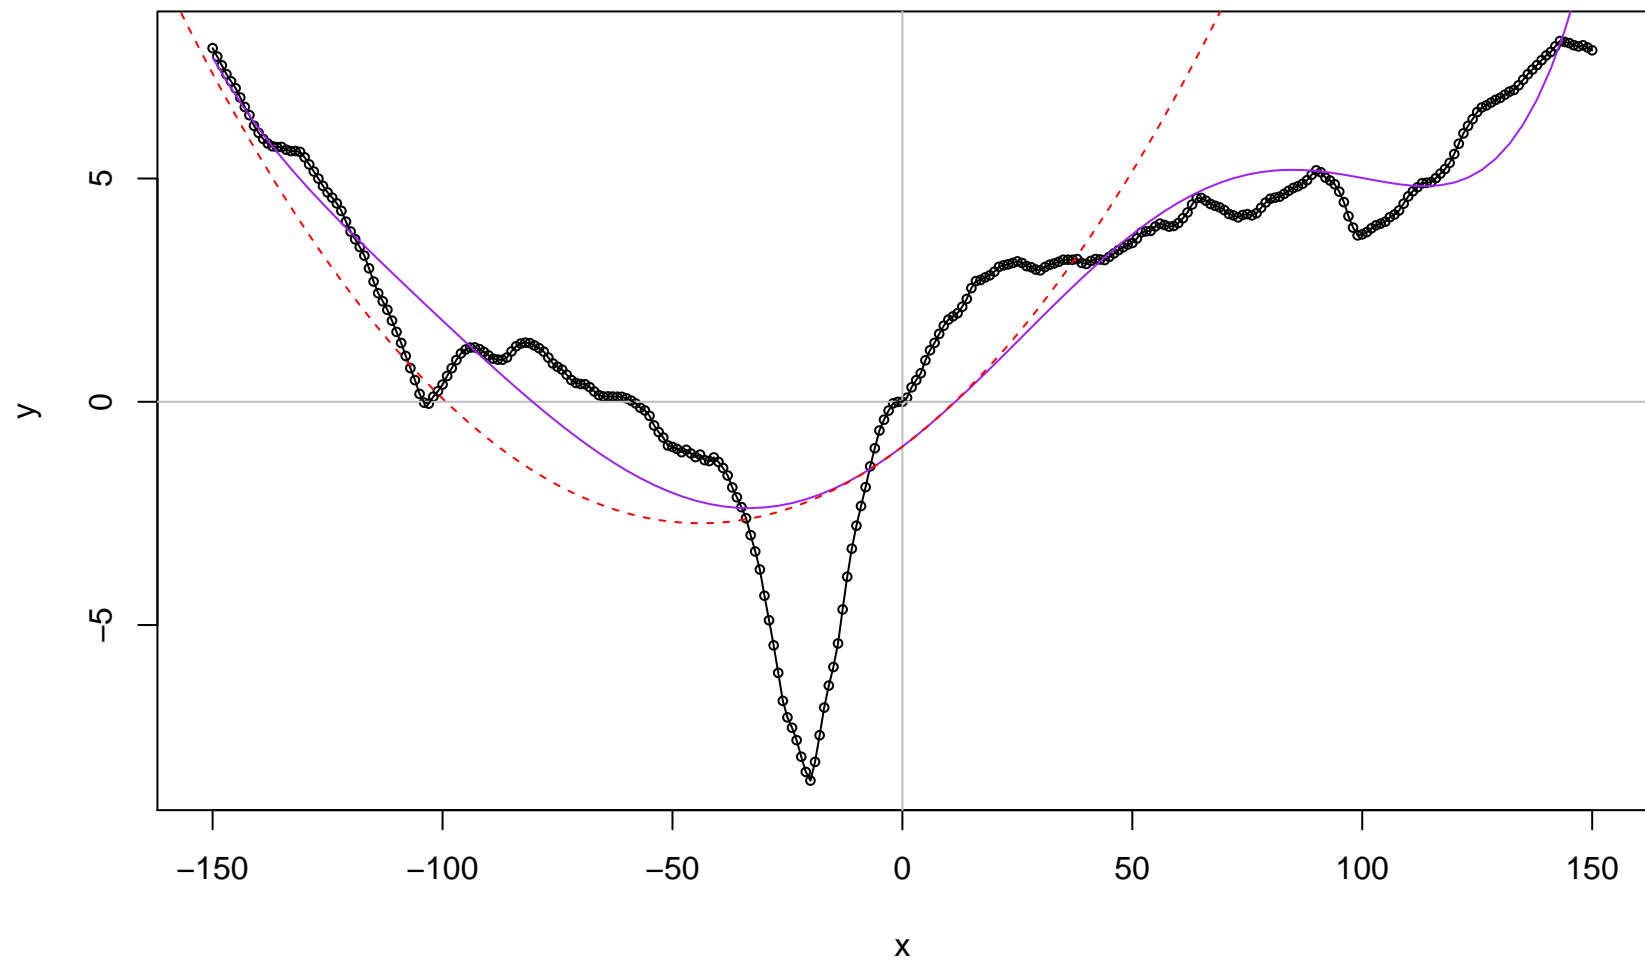

Site 311

$K*100= 0.3773$

$R^2= 0.9386$

radius= 265.0435

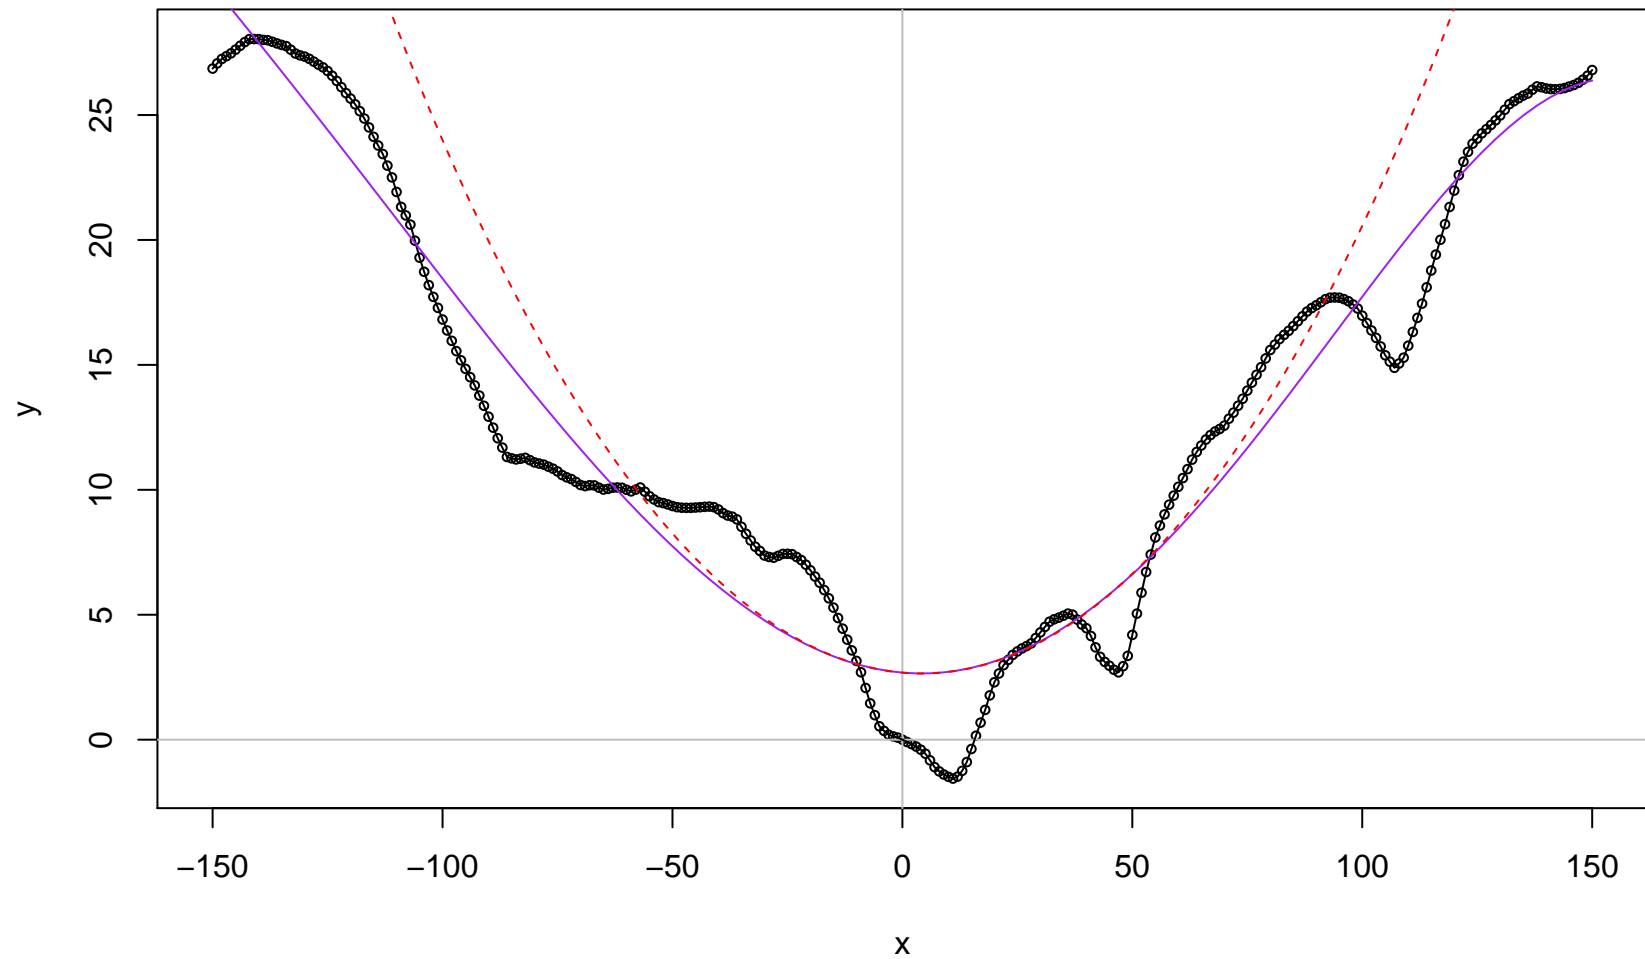

Site 312

$K \cdot 100 = 0.0045$

$R^2 = 0.8901$

radius= 22320.4902

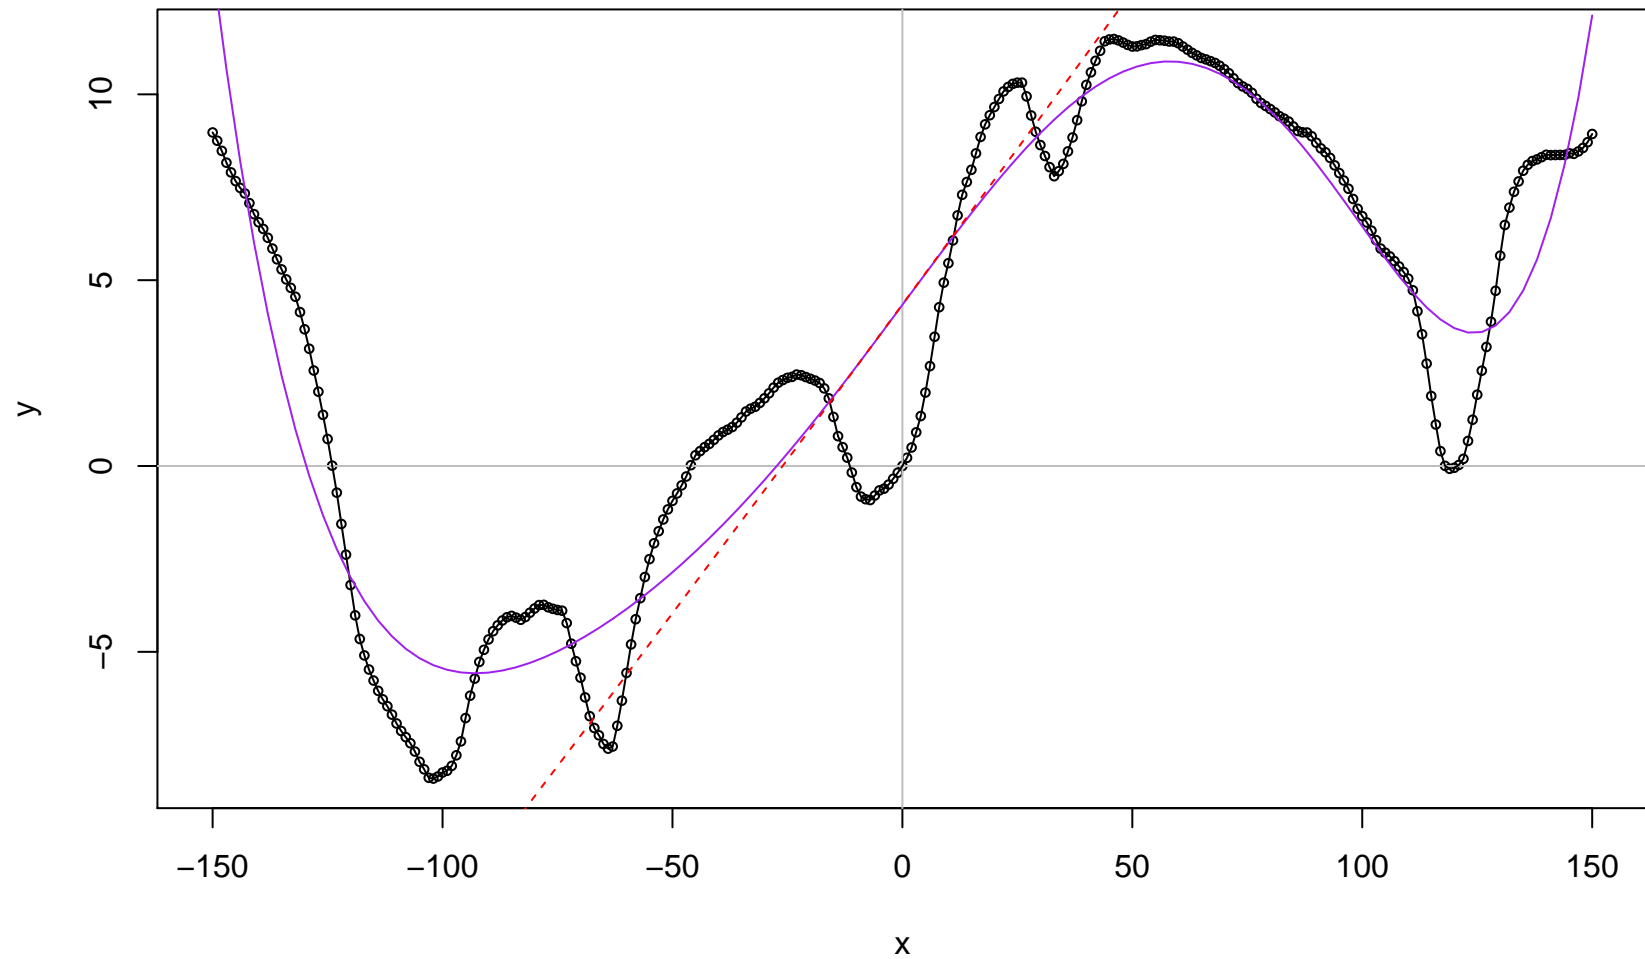



Site 313

$K*100= 0.262$

$R^2= 0.7724$

radius= 381.7267

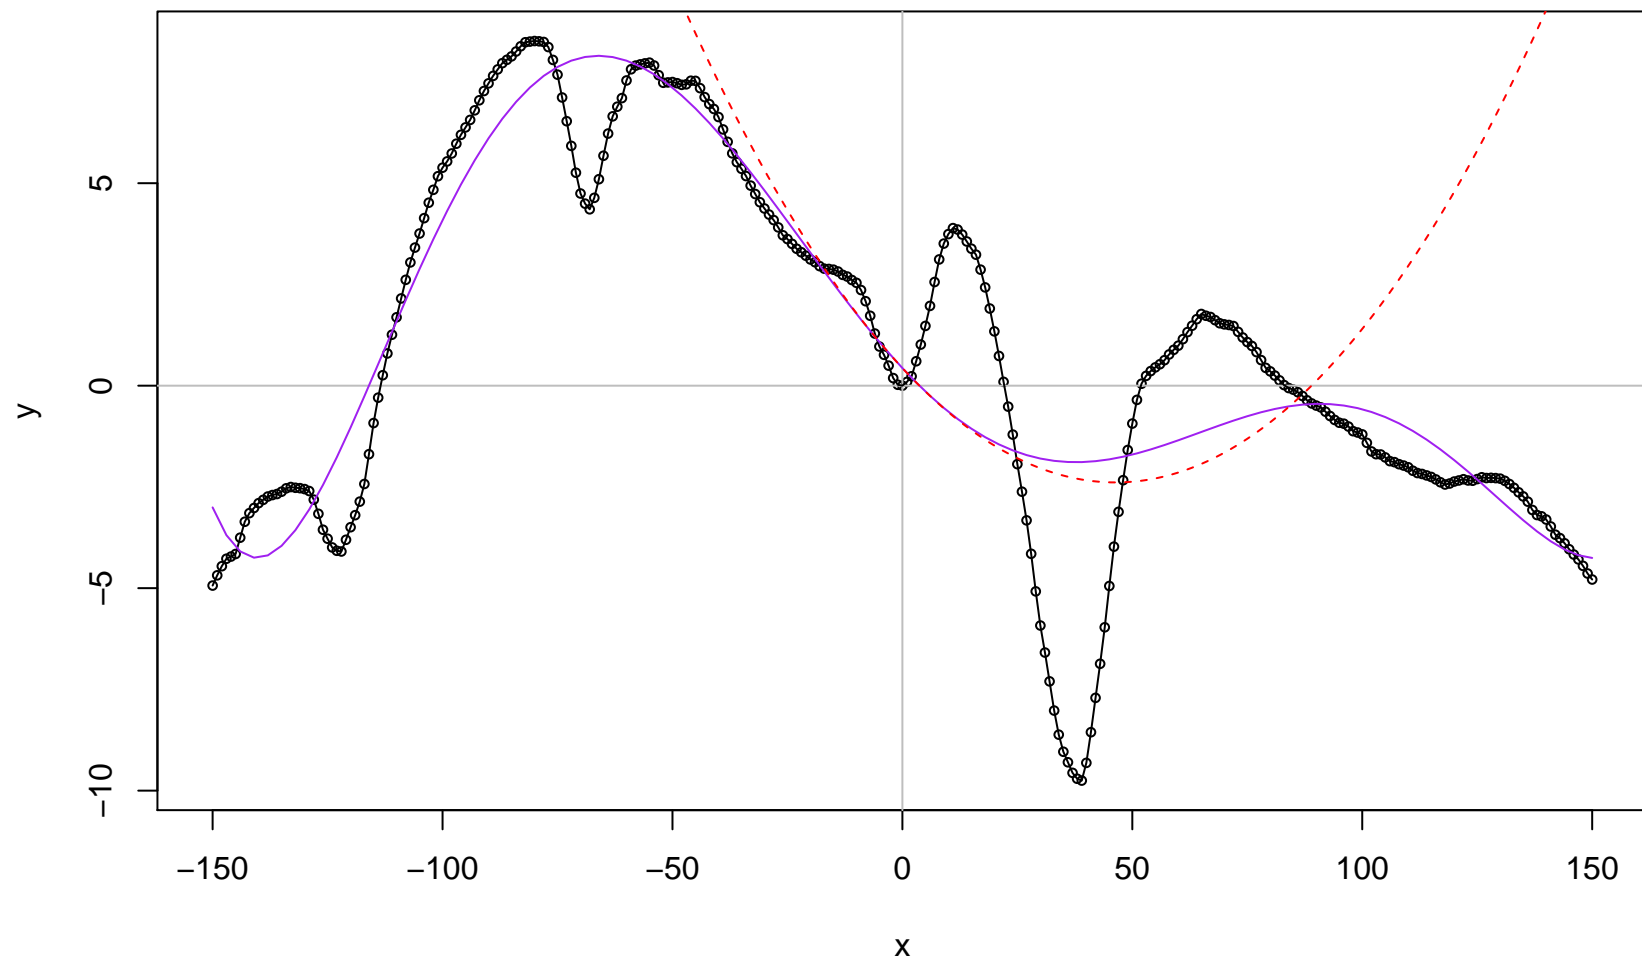

Site 314

$K \cdot 100 = 1.3997$

$R^2 = 0.9839$

radius= 71.4426

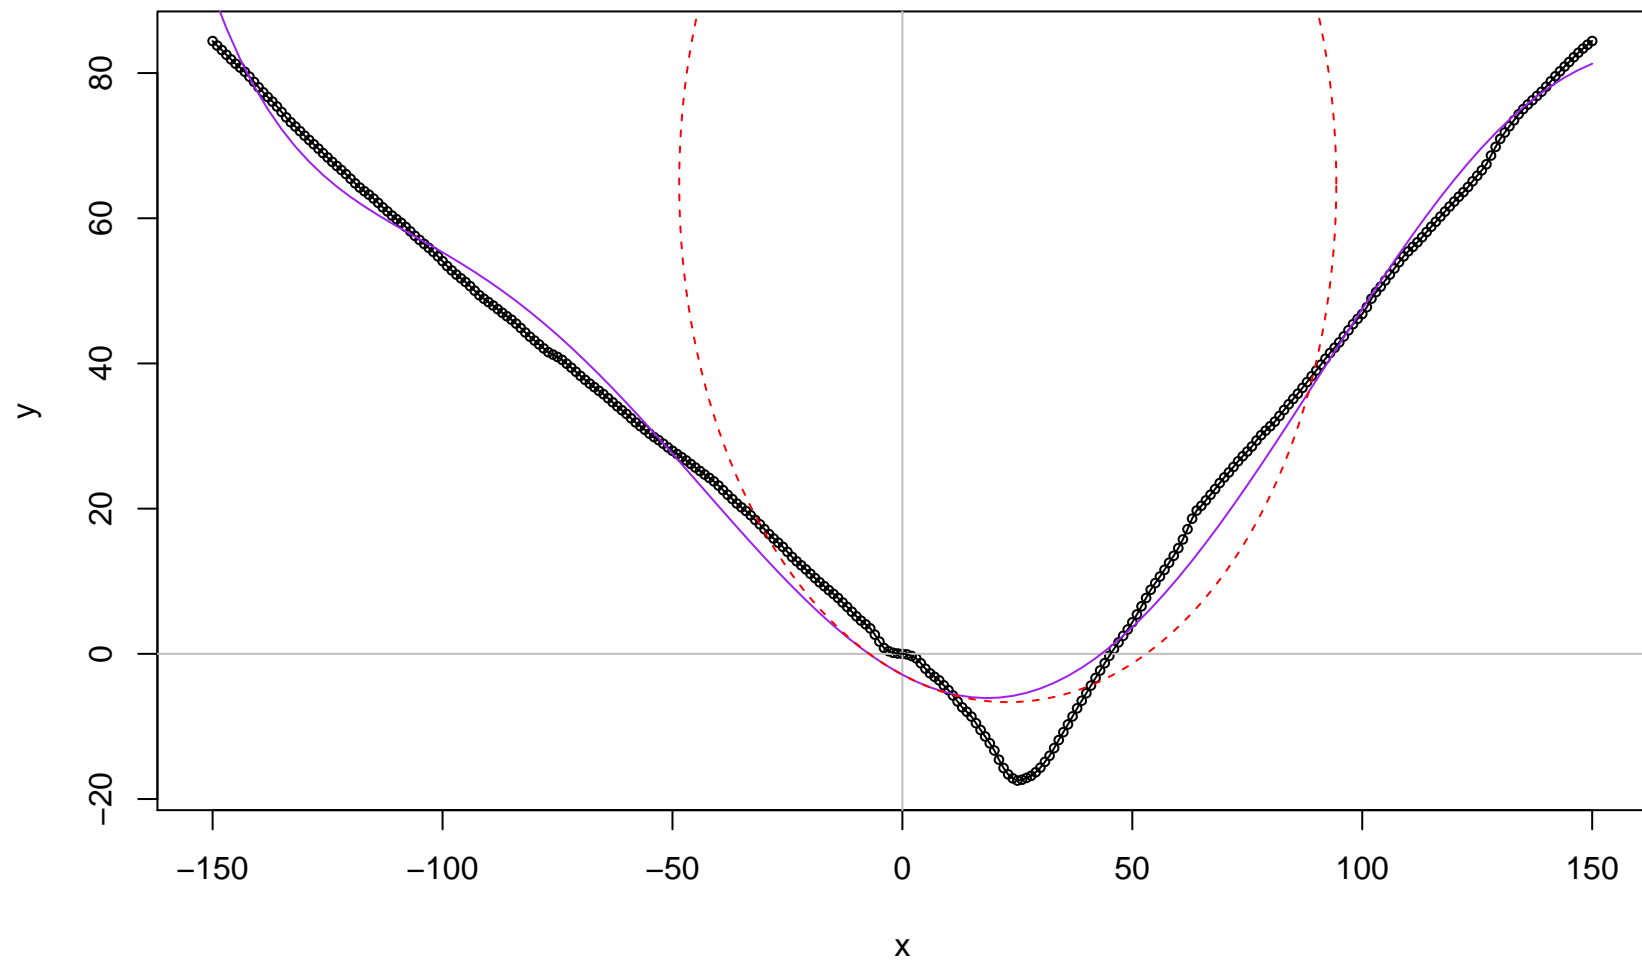

Site 315

$K \cdot 100 = 1.492$

$R^2 = 0.9838$

radius= 67.0233

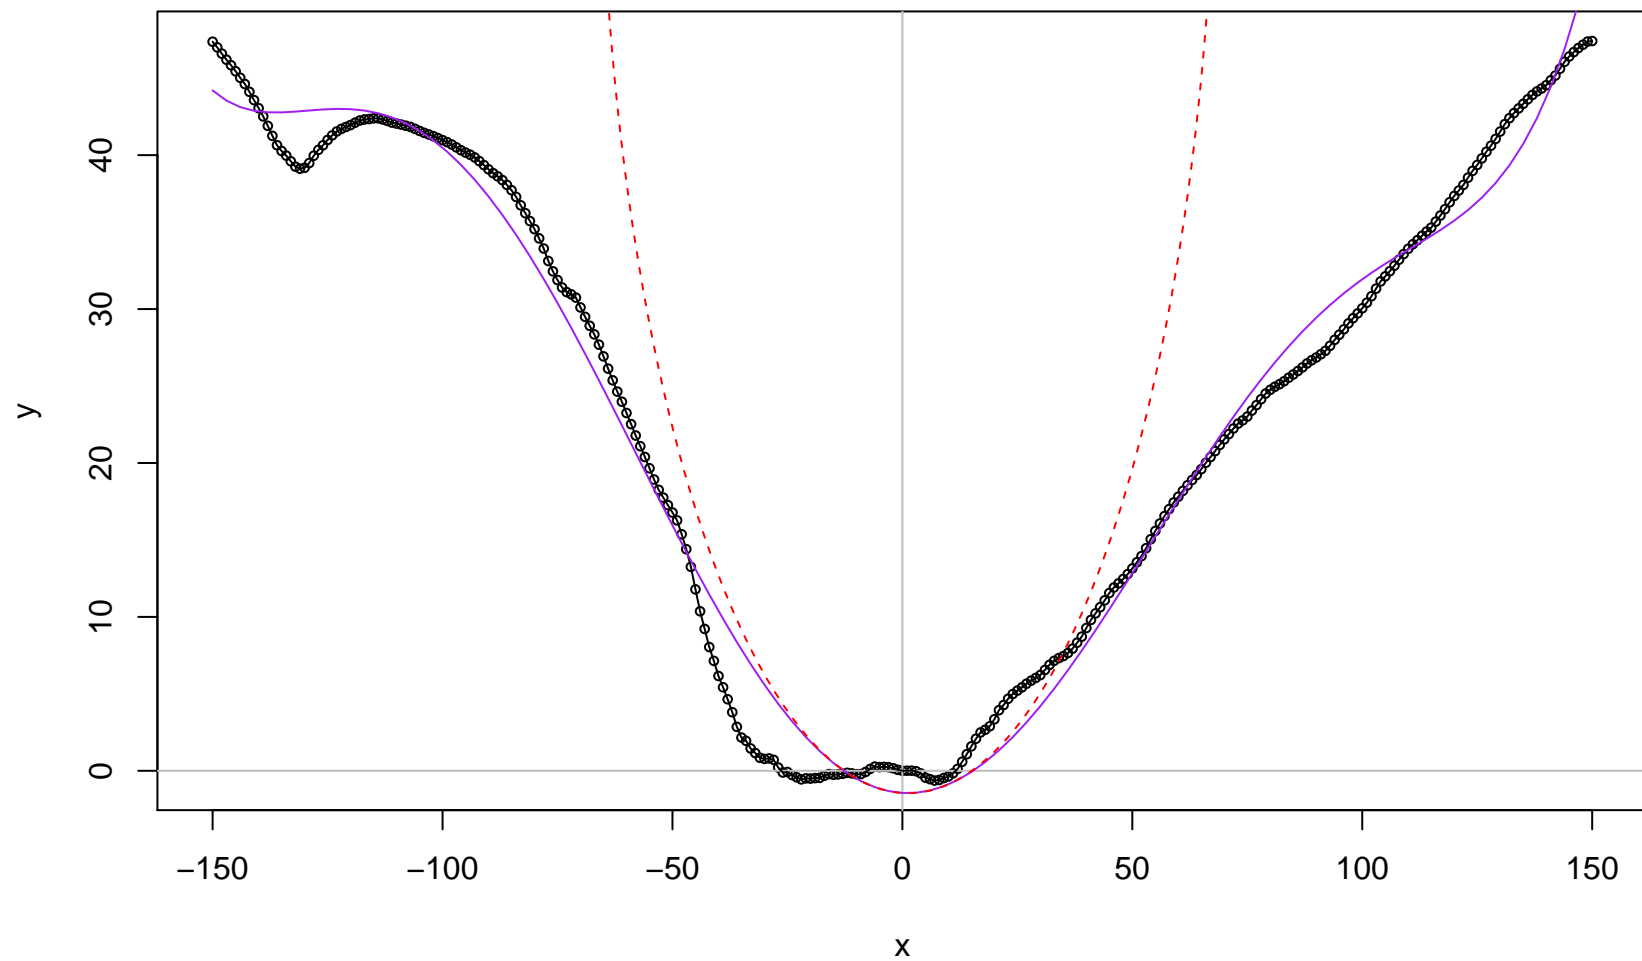

Site 316

$K \cdot 100 = 1.8755$

$R^2 = 0.986$

radius = 53.3188

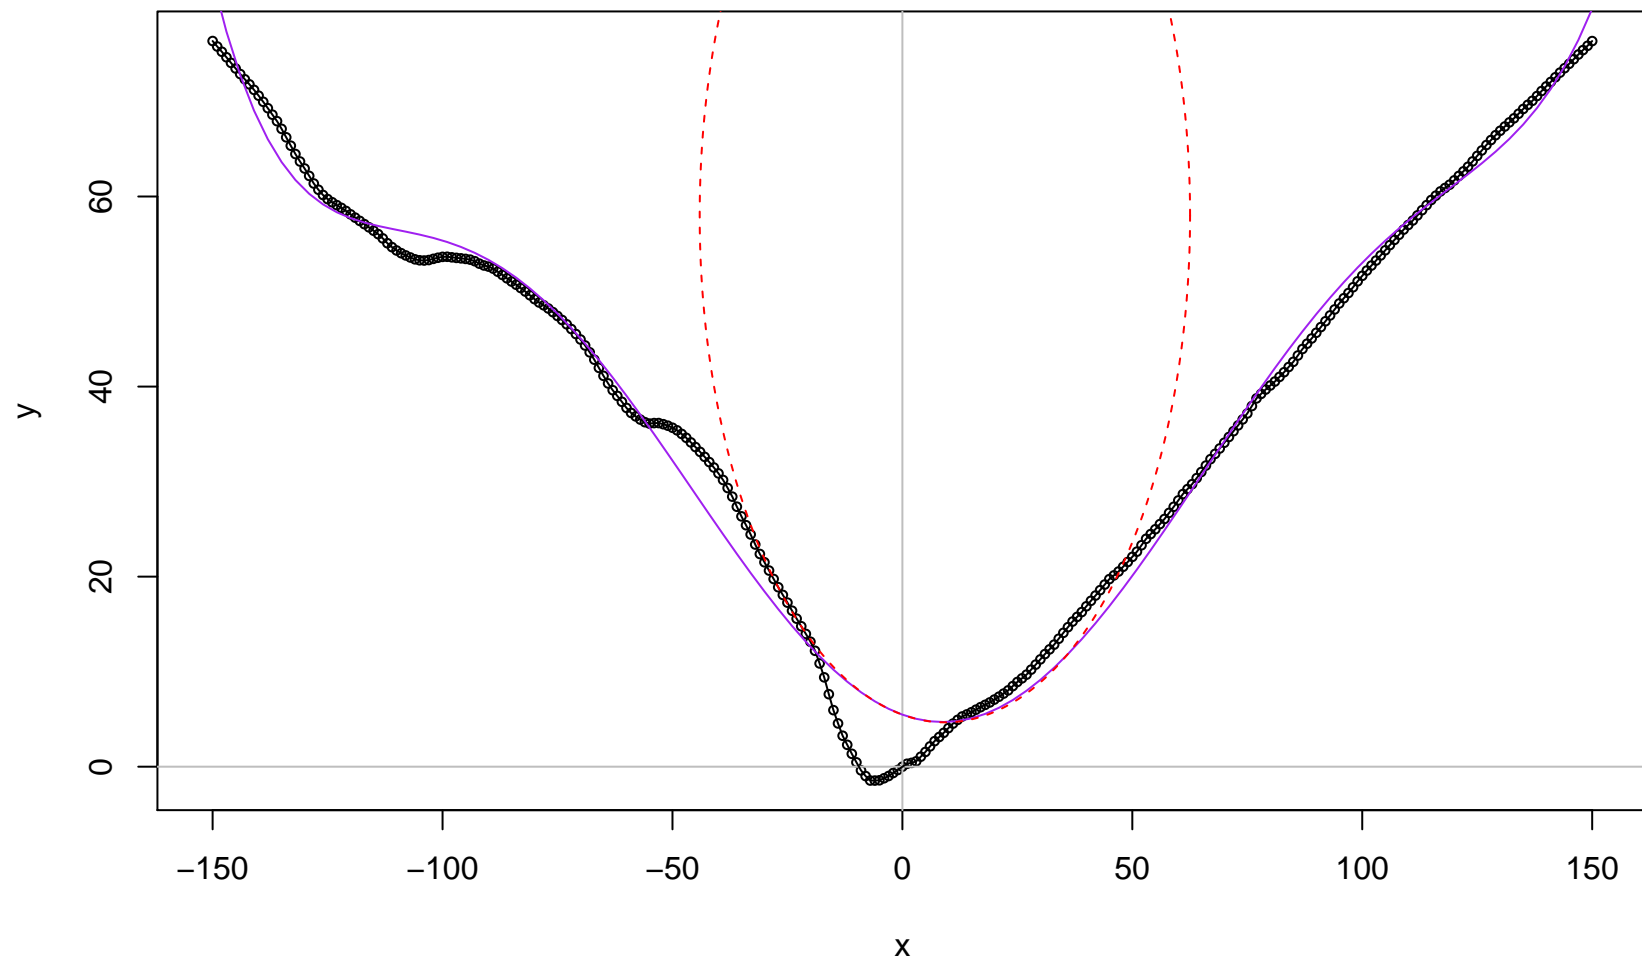

Site 317

$K*100= 1.6048$

$R^2= 0.9781$

radius= 62.3135

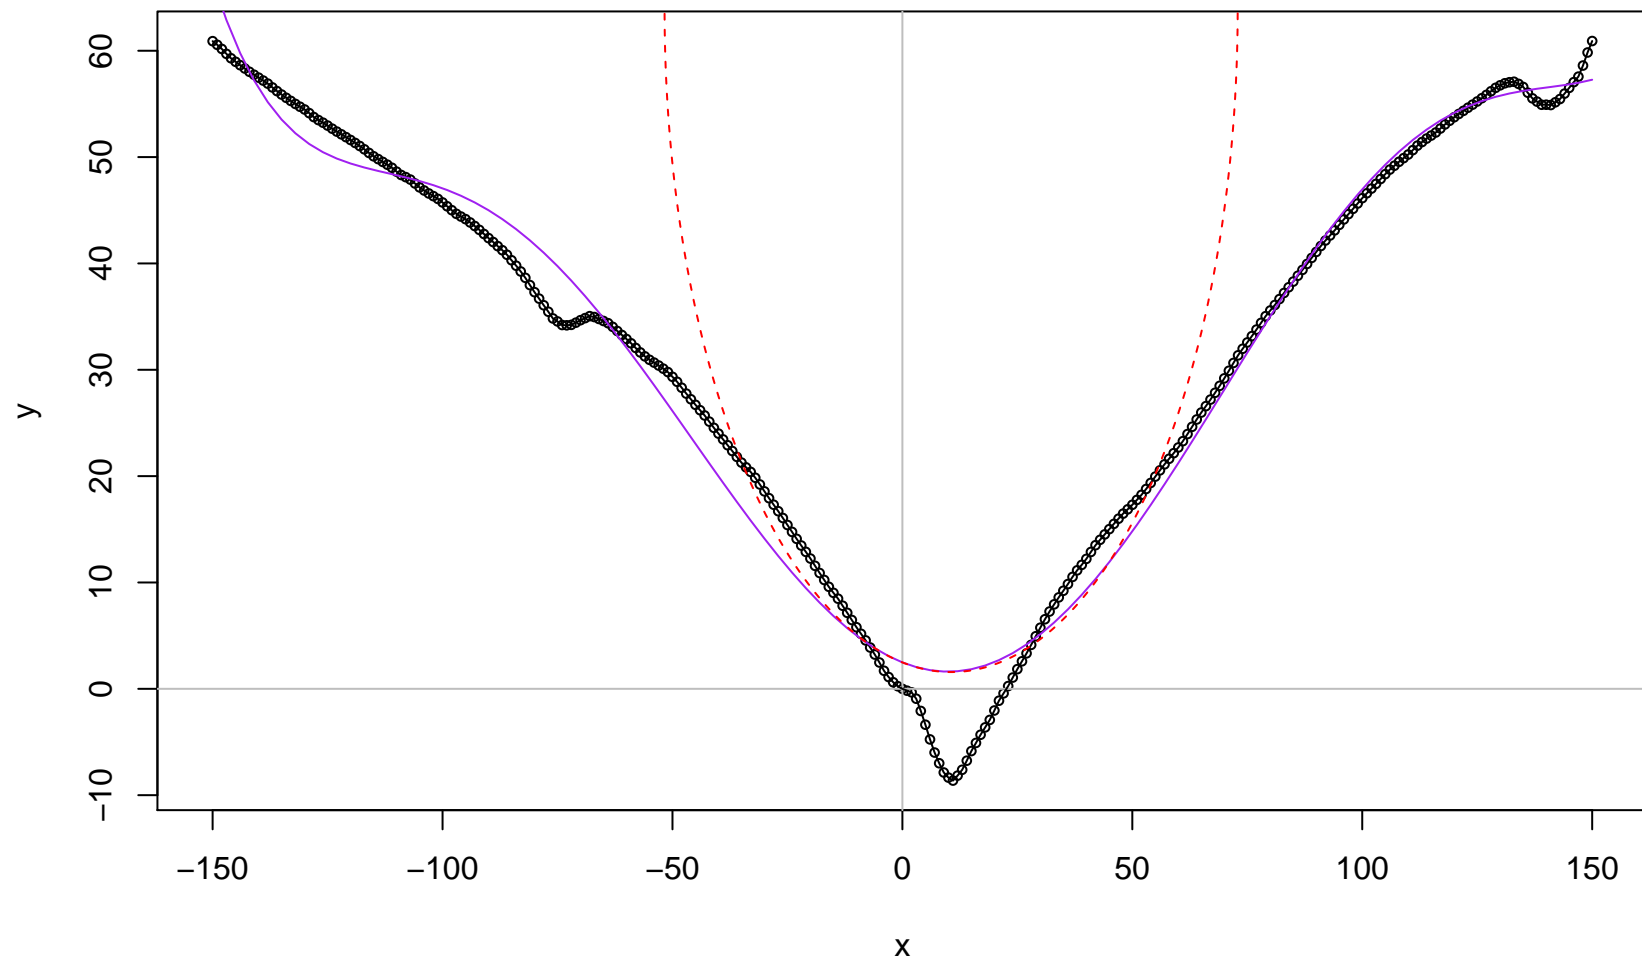

Site 318

$K*100= 1.8422$

$R^2= 0.9882$

radius= 54.2832

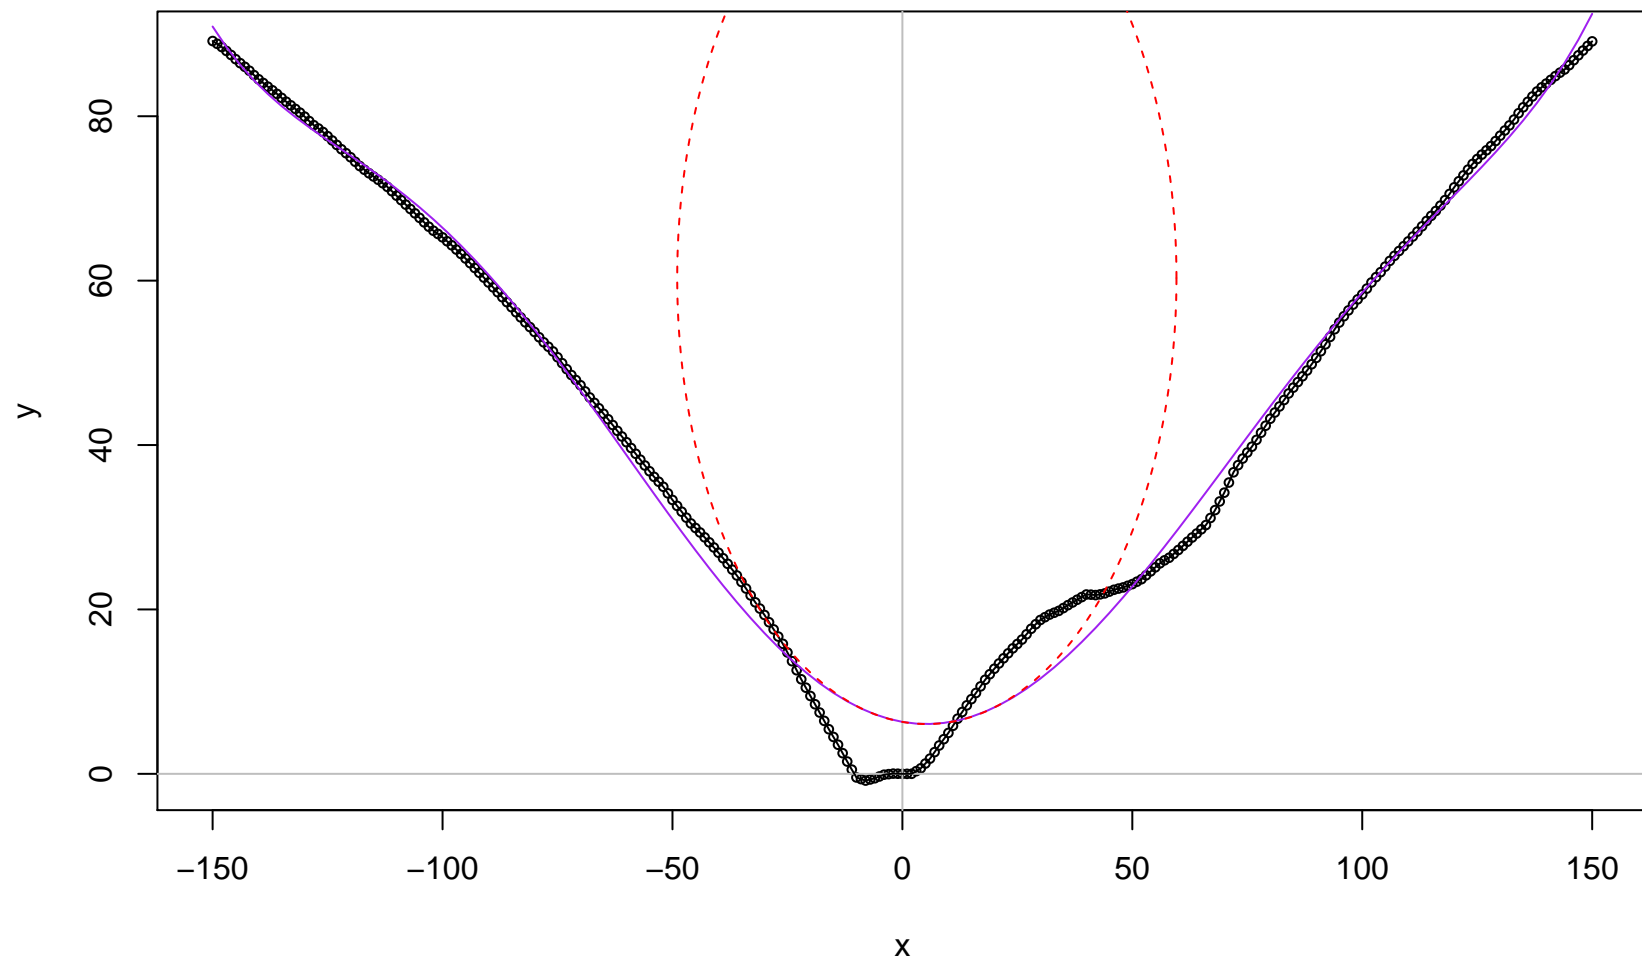

Site 319

$K*100= 1.0749$

$R^2= 0.9076$

radius= 93.032

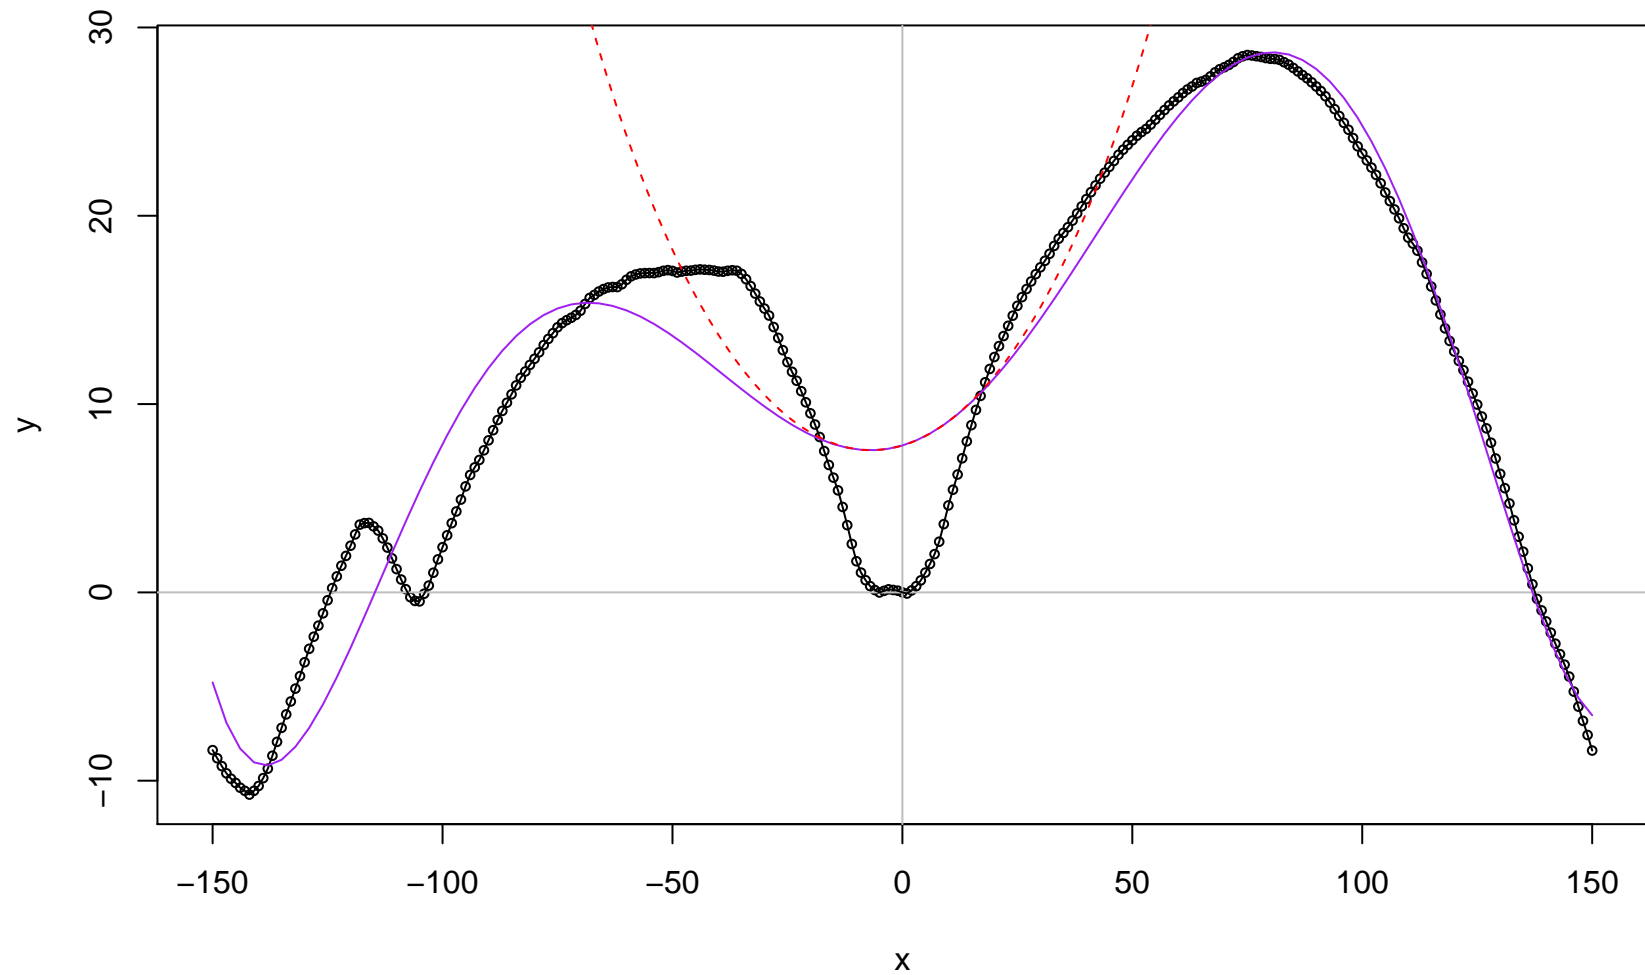

Site 320

$K*100 = -0.9408$

$R^2 = 0.9822$

radius =  $-106.2975$

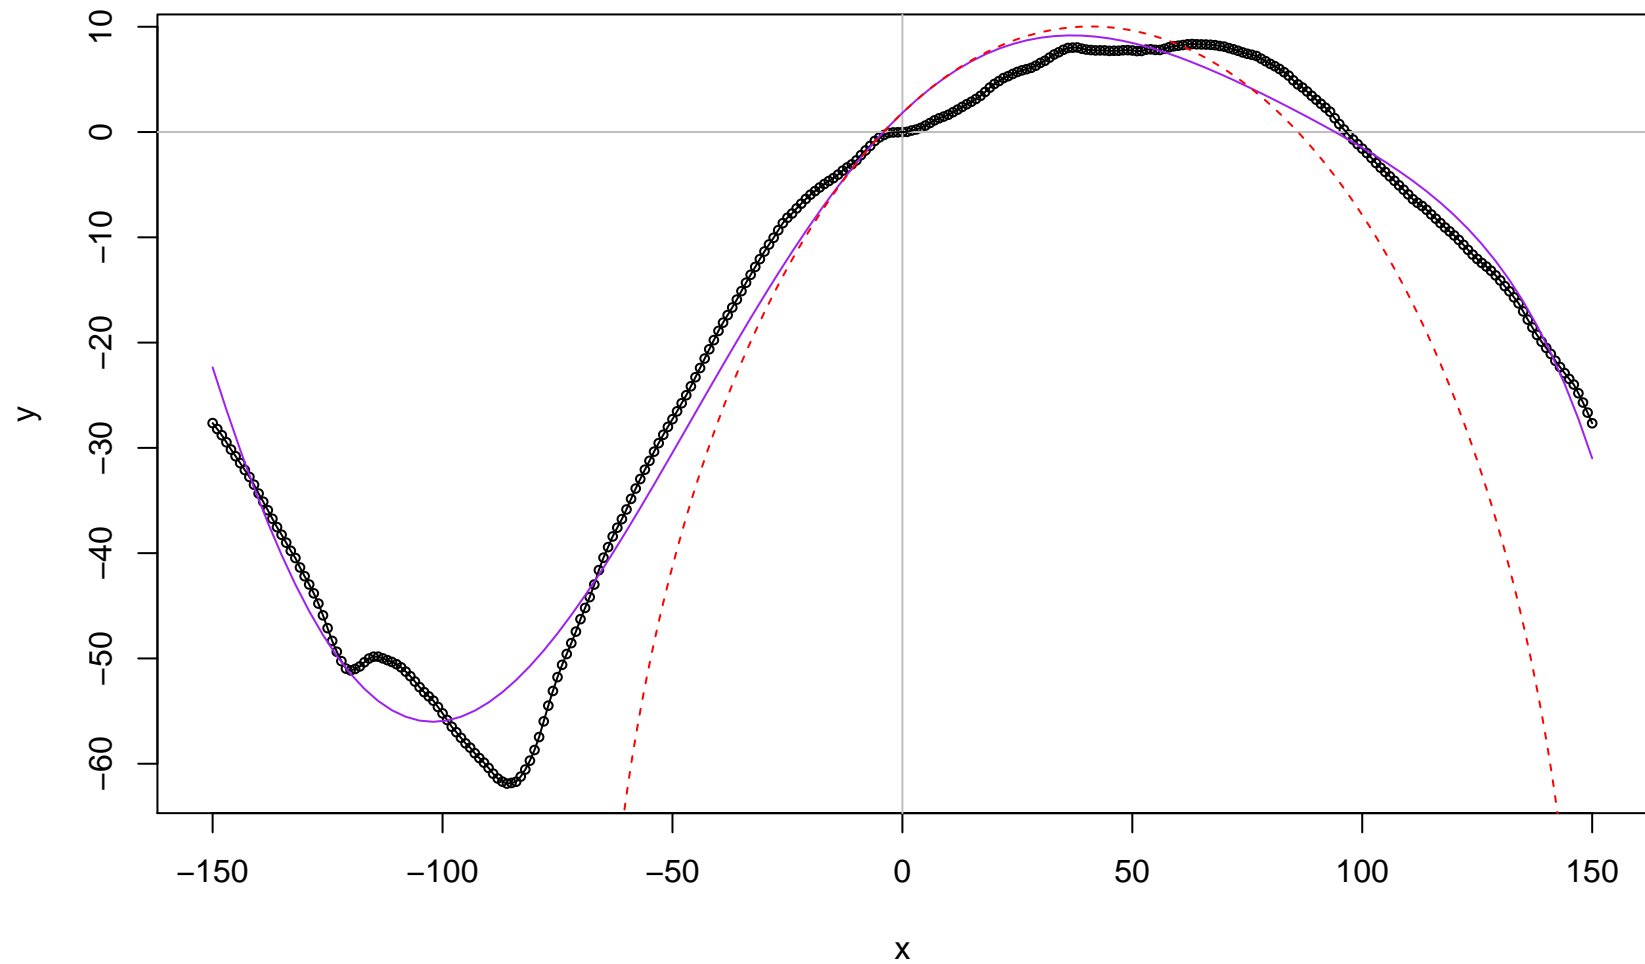



Site 321

$K*100 = -0.4193$

$R^2 = 0.7584$

radius =  $-238.4853$

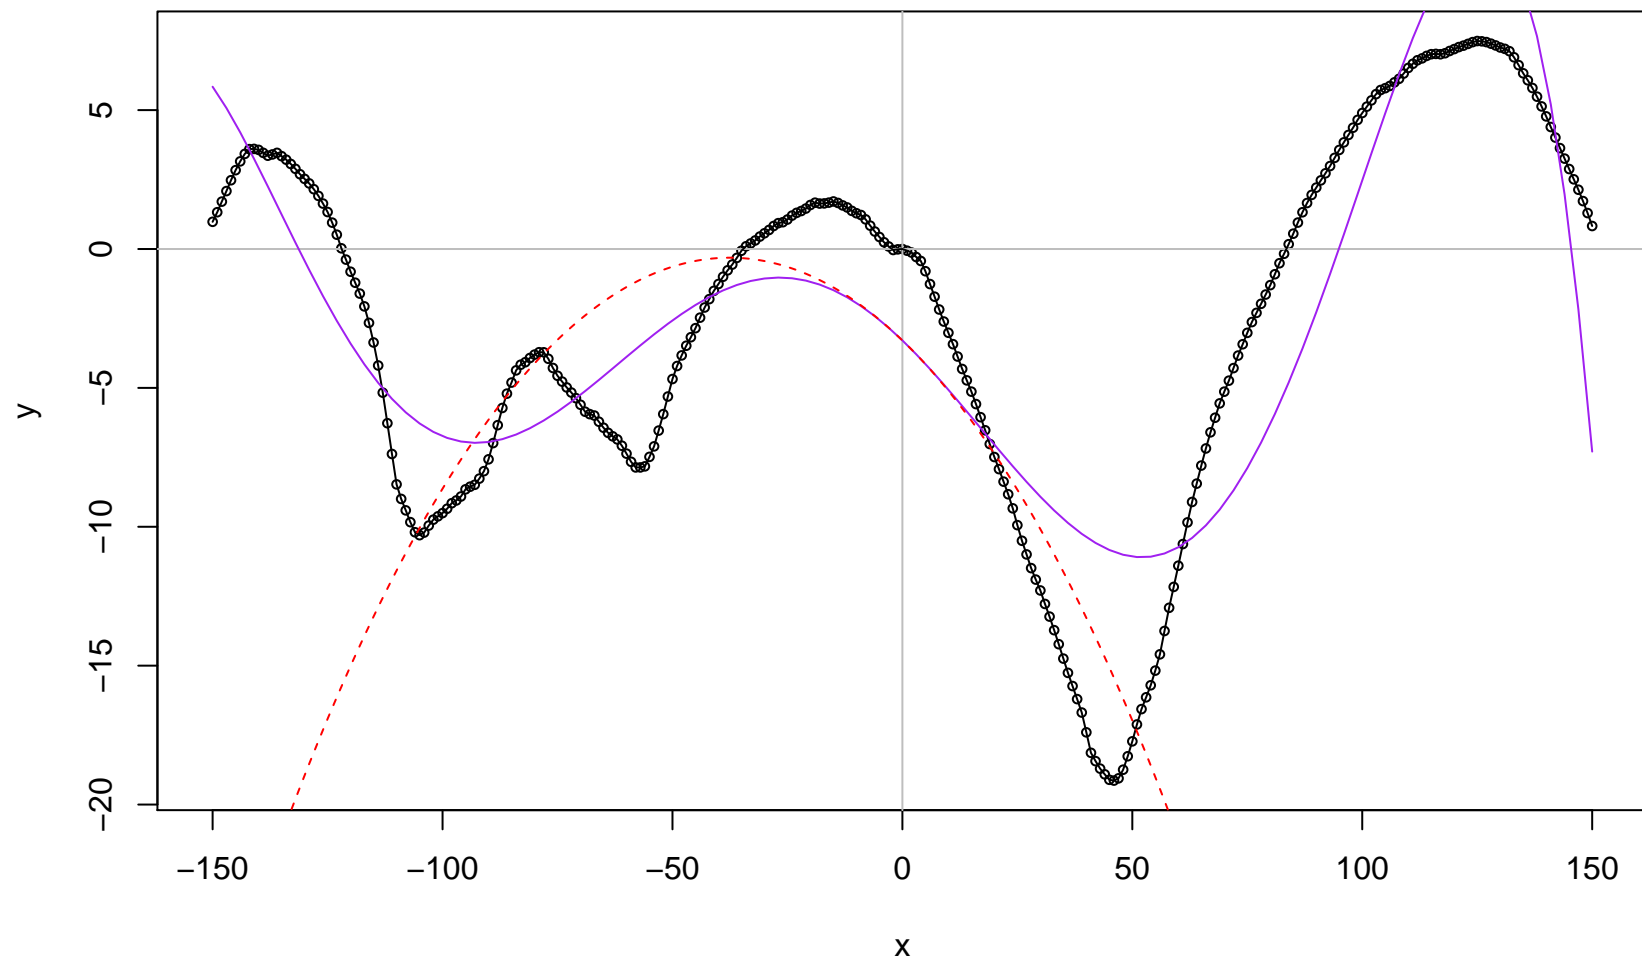

Site 322

$K*100 = -0.0358$

$R^2 = 0.8798$

radius = -2789.6523

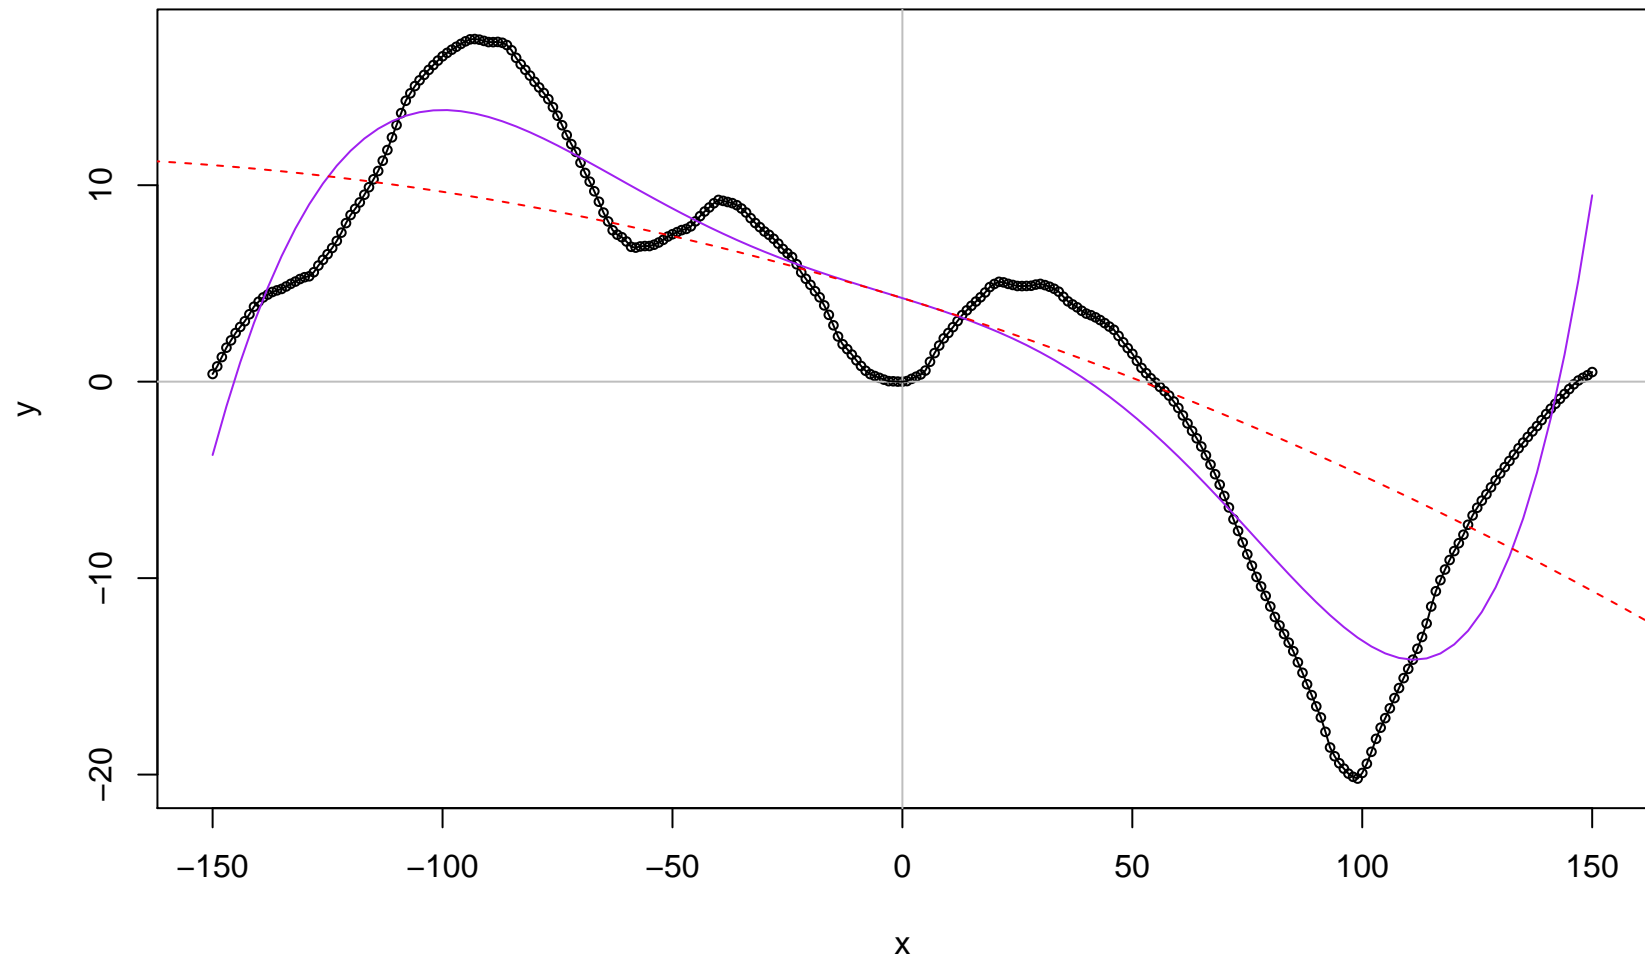

Site 323

$K \cdot 100 = -0.319$

$R^2 = 0.9207$

radius = -313.4453

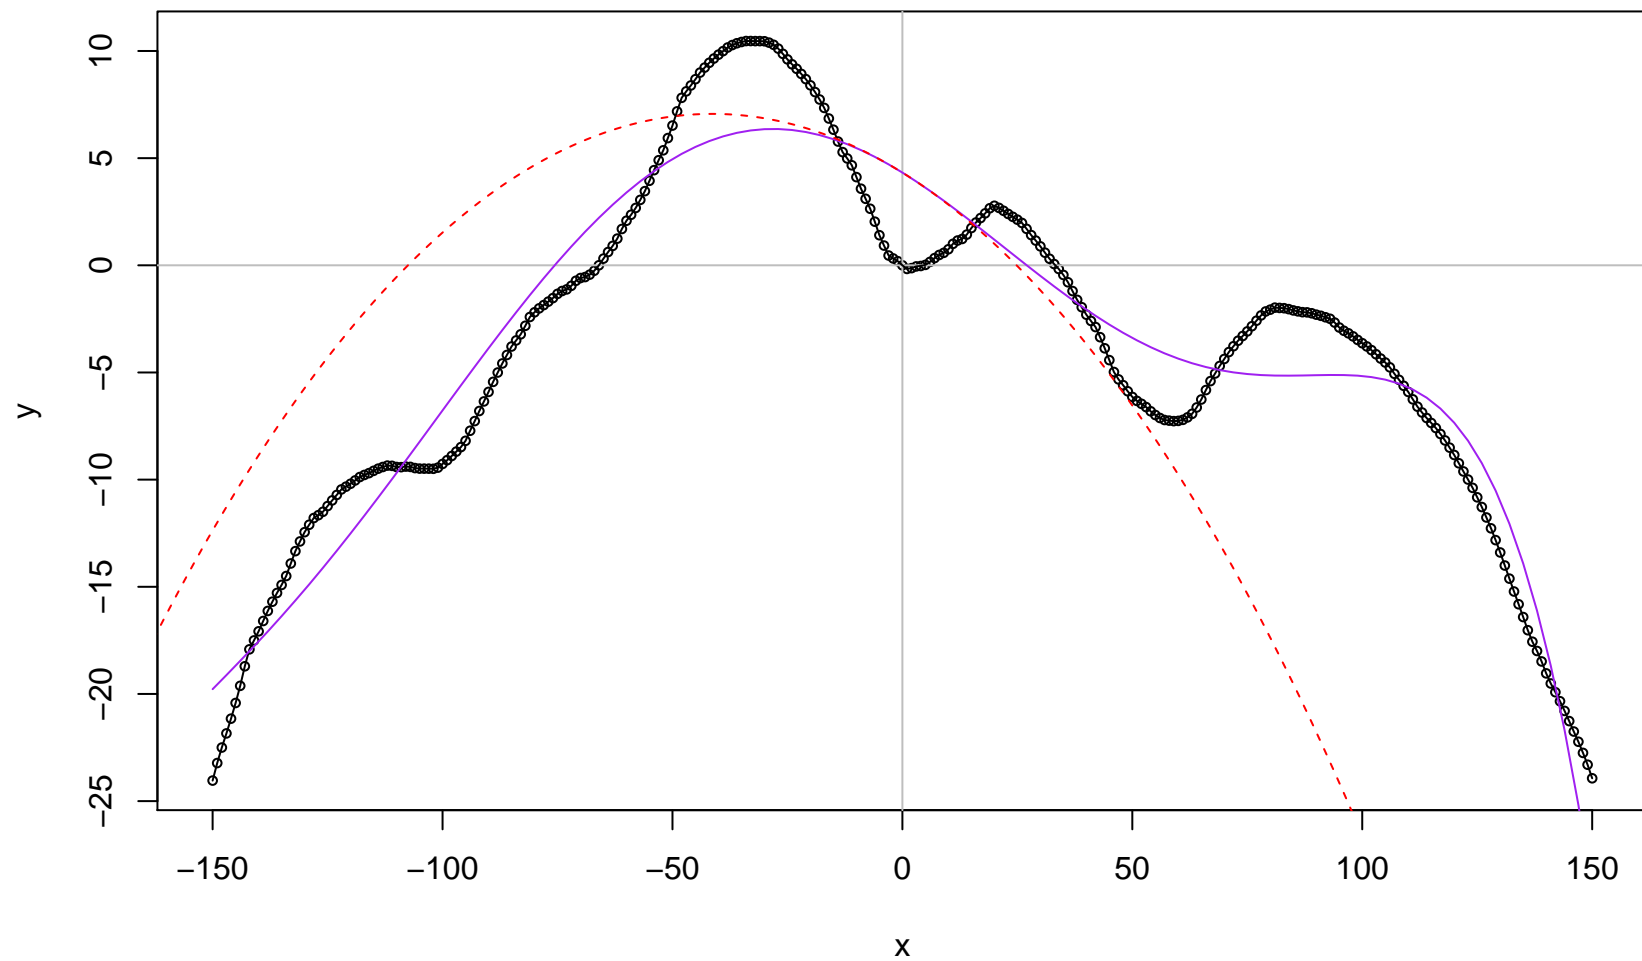

Site 324

$K*100 = -0.1241$

$R^2 = 0.7935$

radius =  $-805.6911$

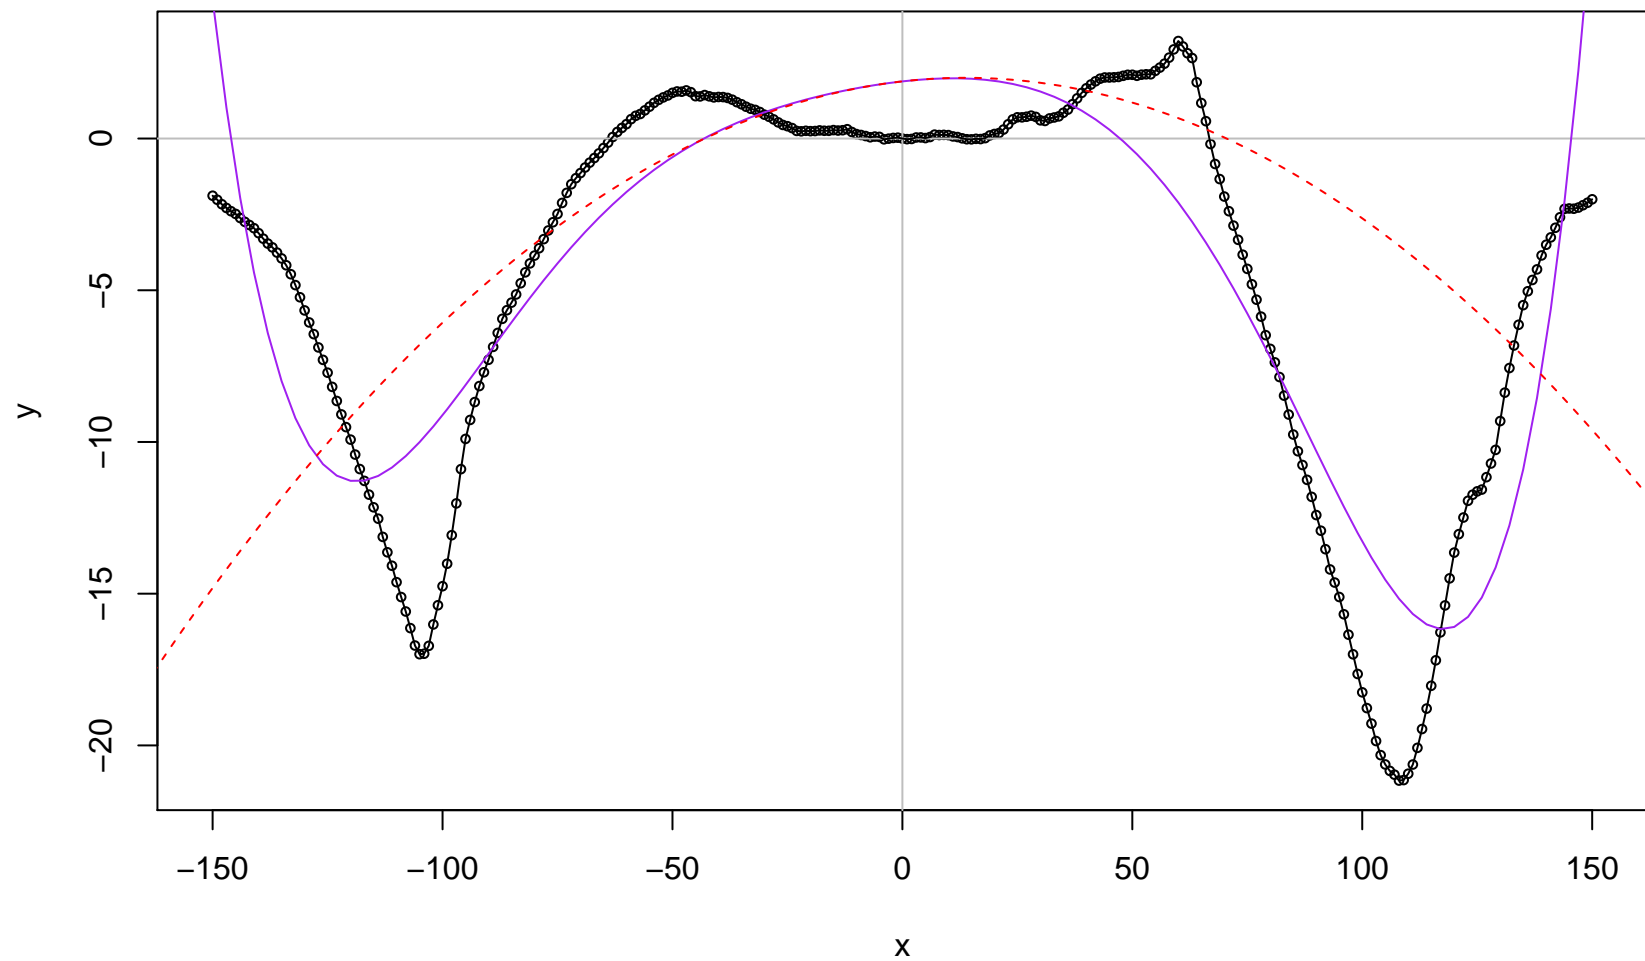

Site 325

$K*100= 0.6865$

$R2= 0.7513$

radius= 145.658

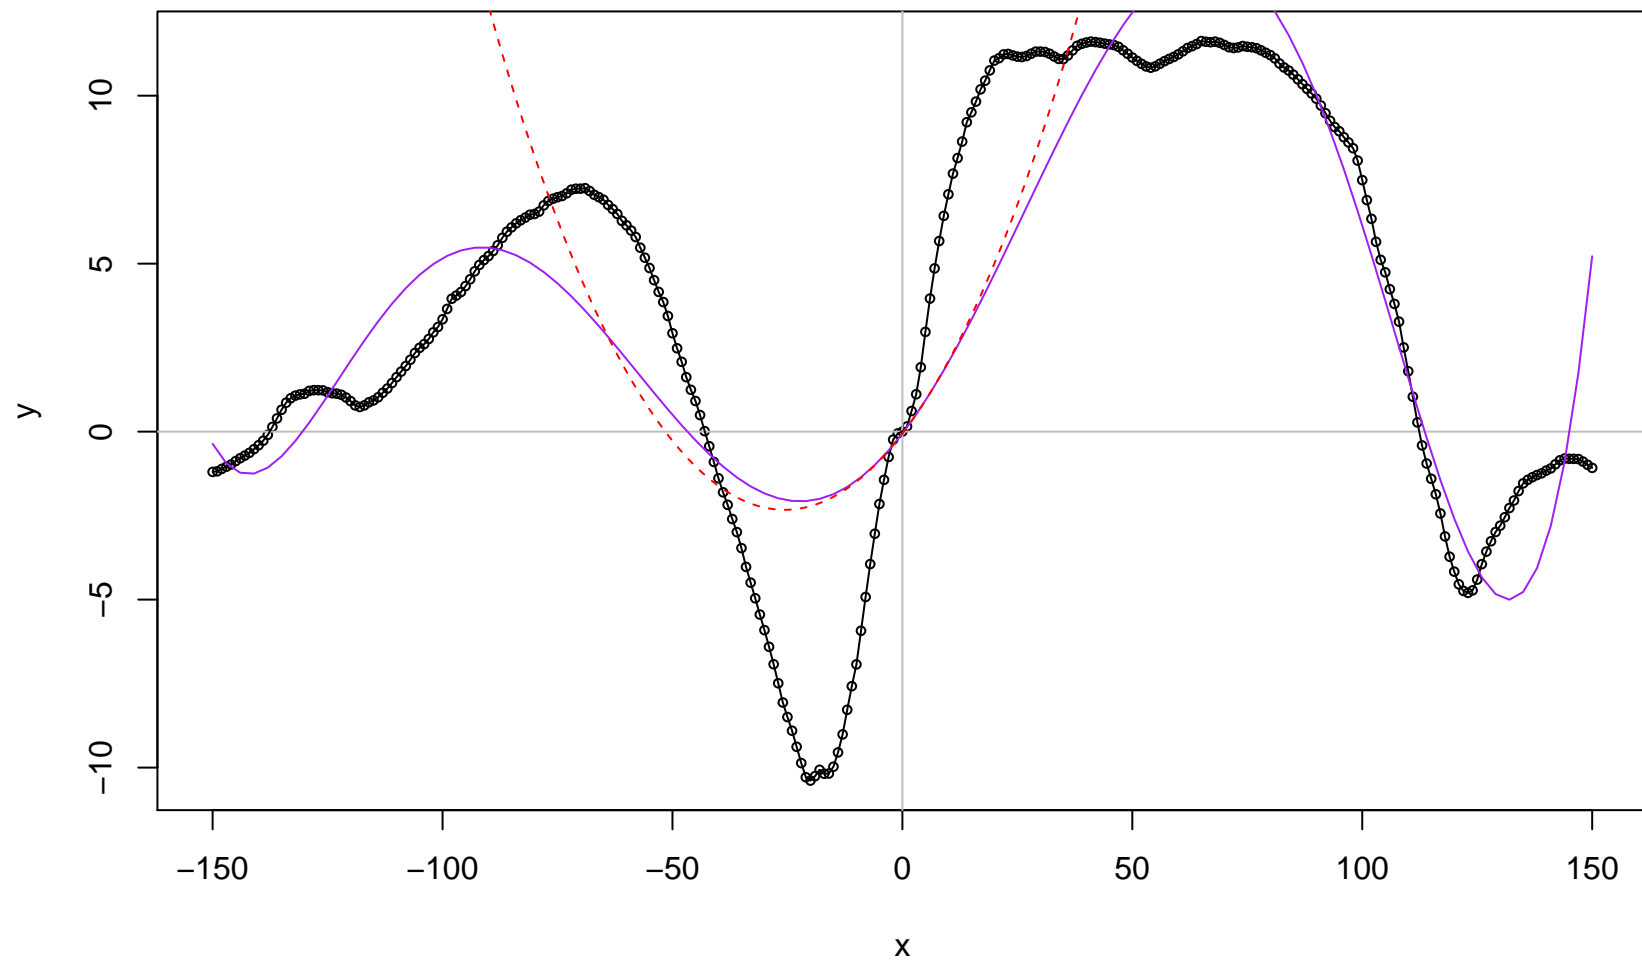

Site 326

$K \cdot 100 = 0.4097$

$R^2 = 0.7417$

radius= 244.0515

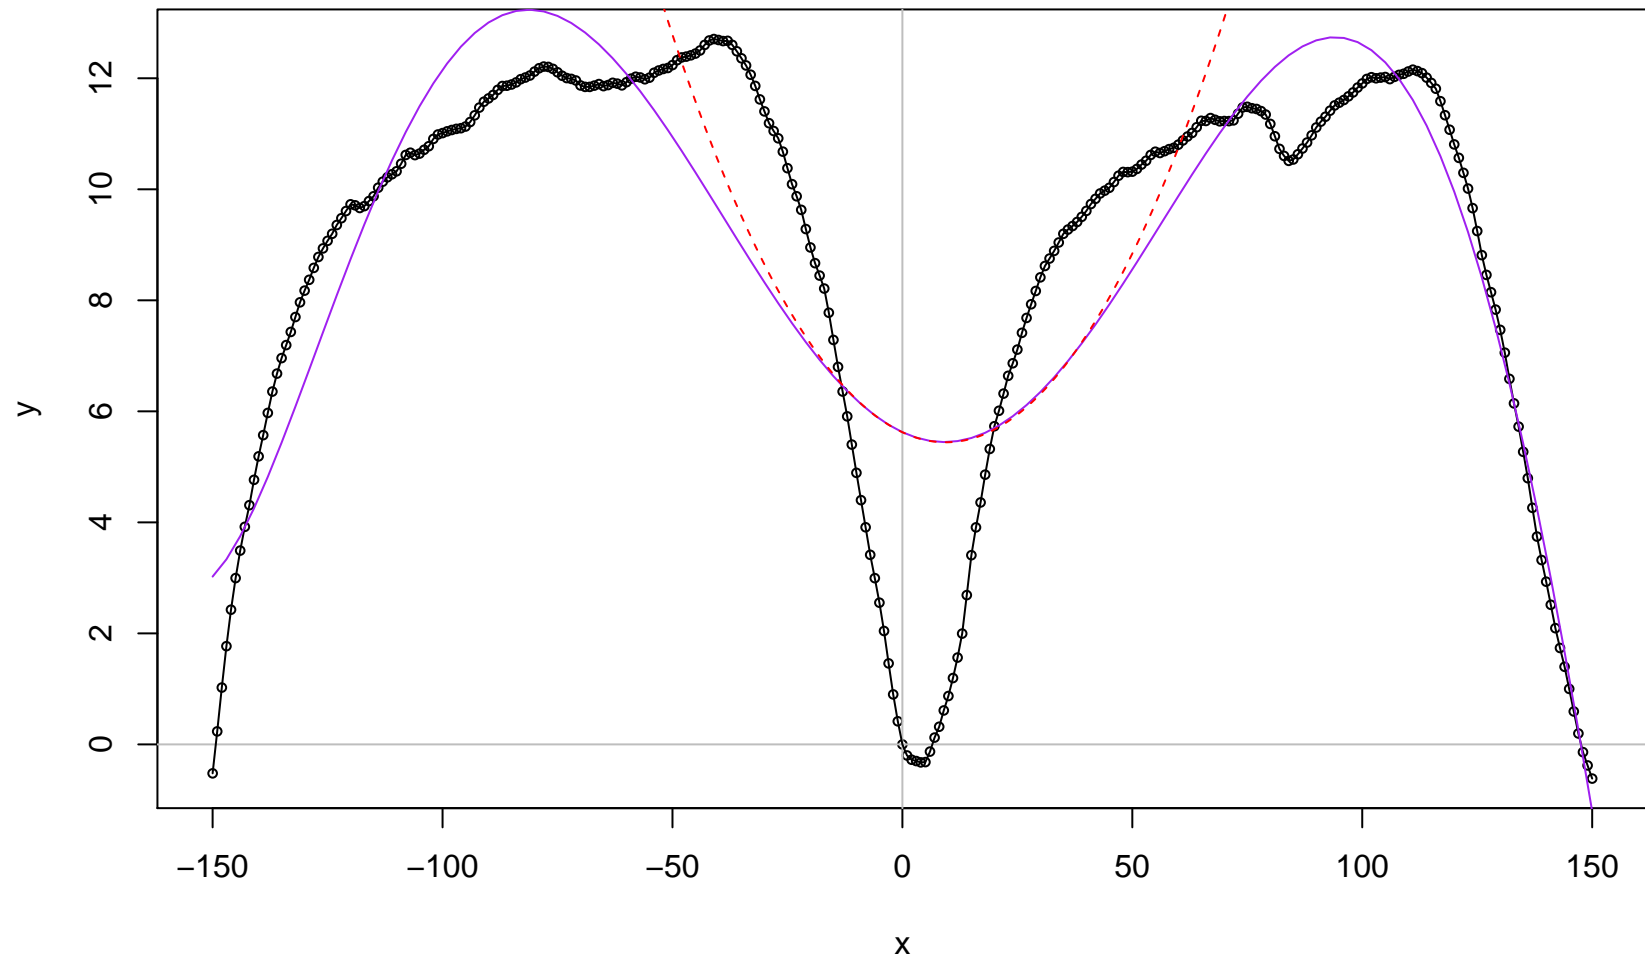

Site 327

$K*100= 2.5977$

$R^2= 0.9883$

radius= 38.4961

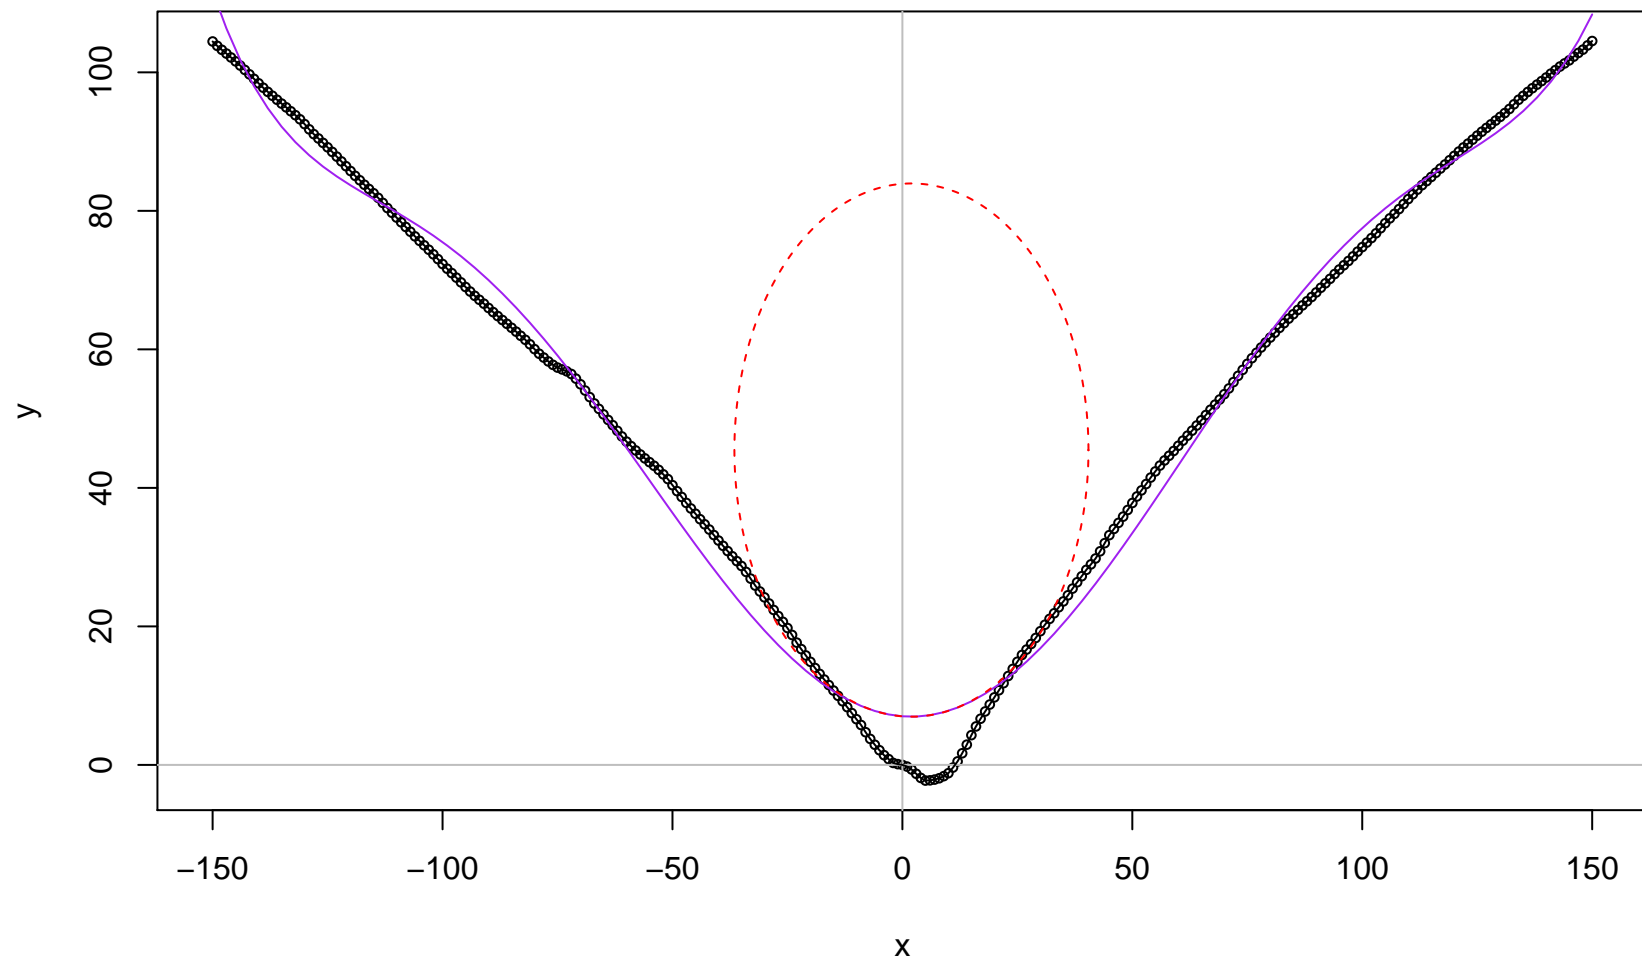

Site 328

$K \cdot 100 = 1.5108$

$R^2 = 0.9883$

radius= 66.1906

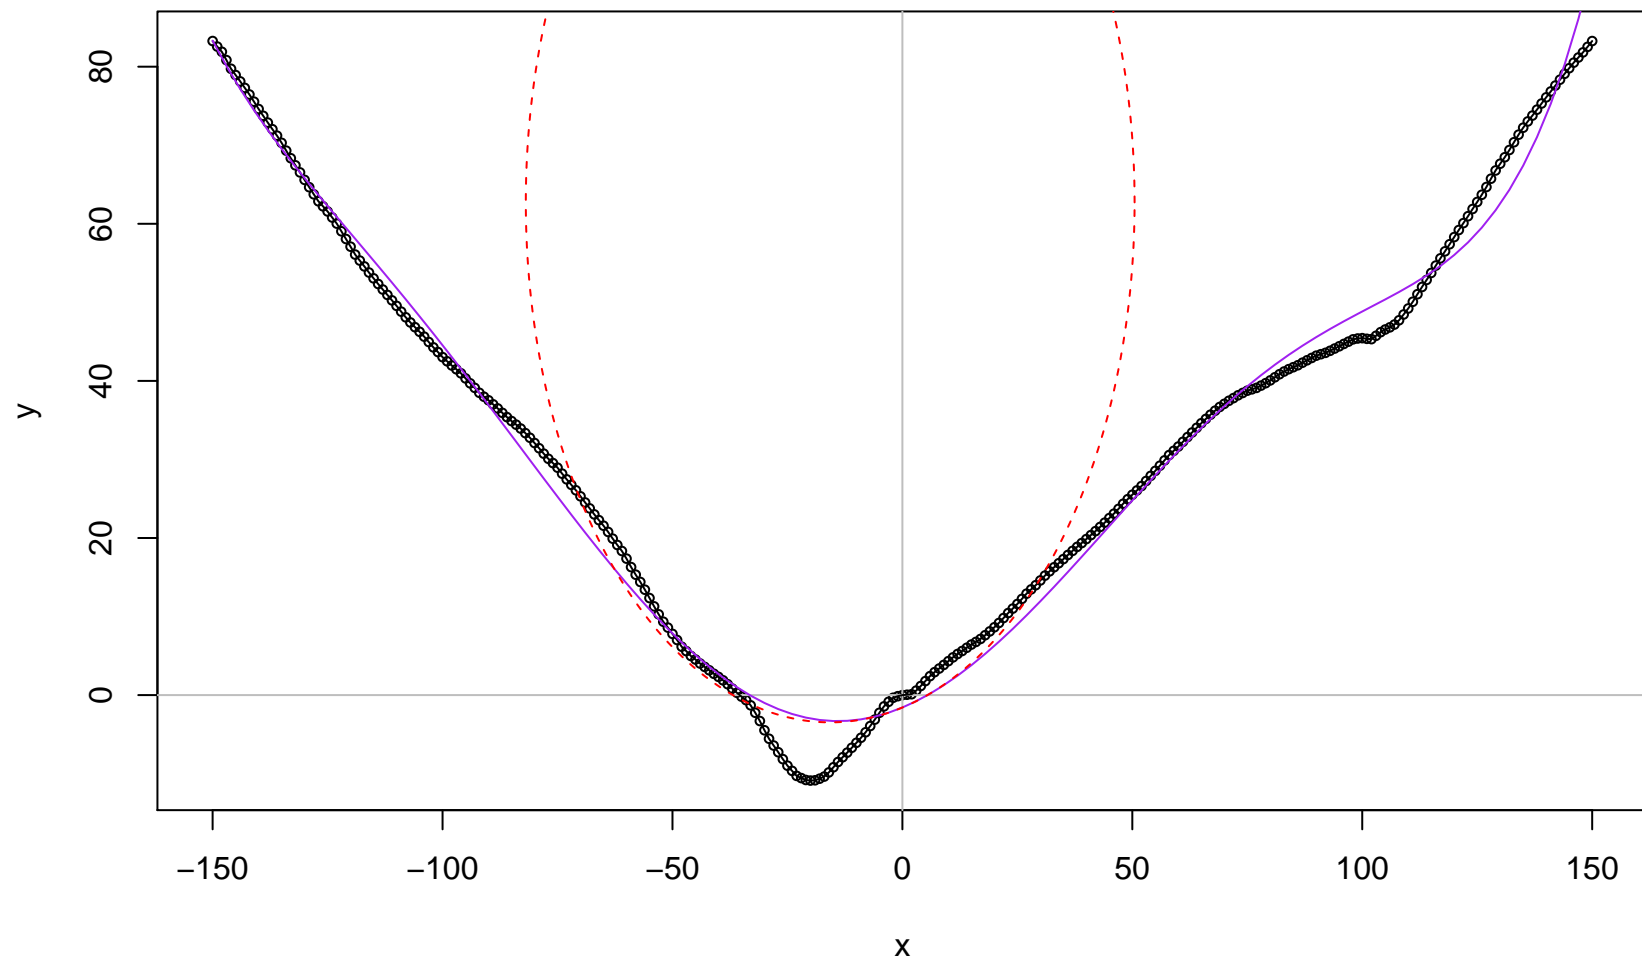



Site 329

$K*100= 0.3119$

$R^2= 0.9168$

radius= 320.6509

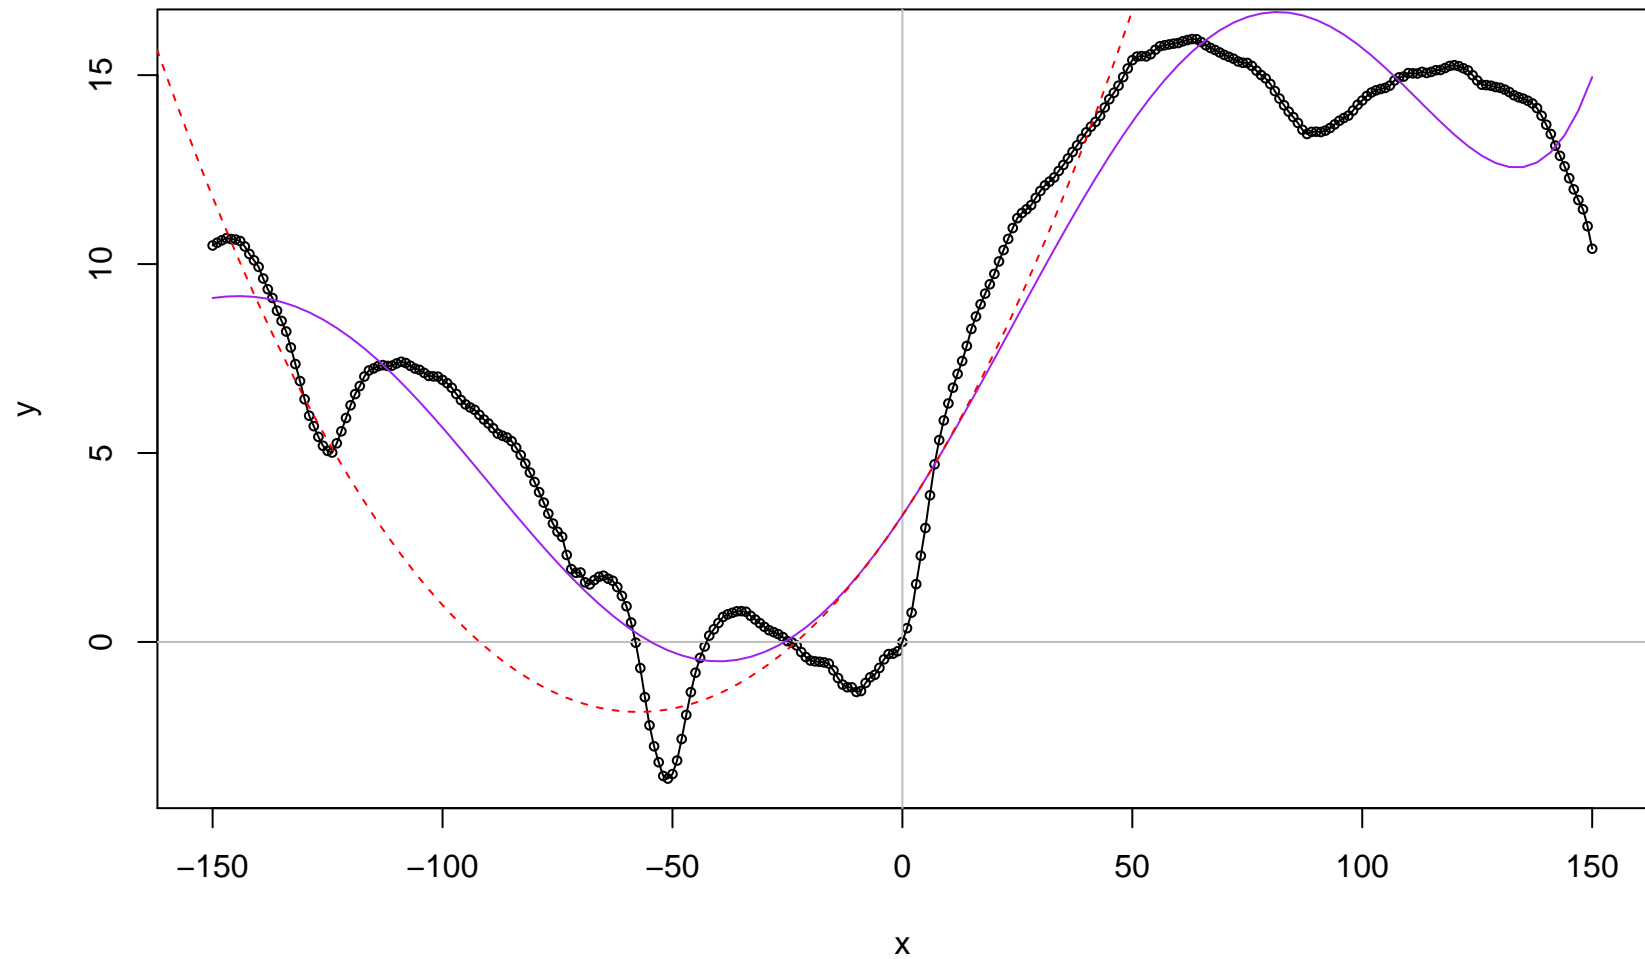

Site 330

$K \cdot 100 = 2.4146$

$R^2 = 0.989$

radius = 41.4147

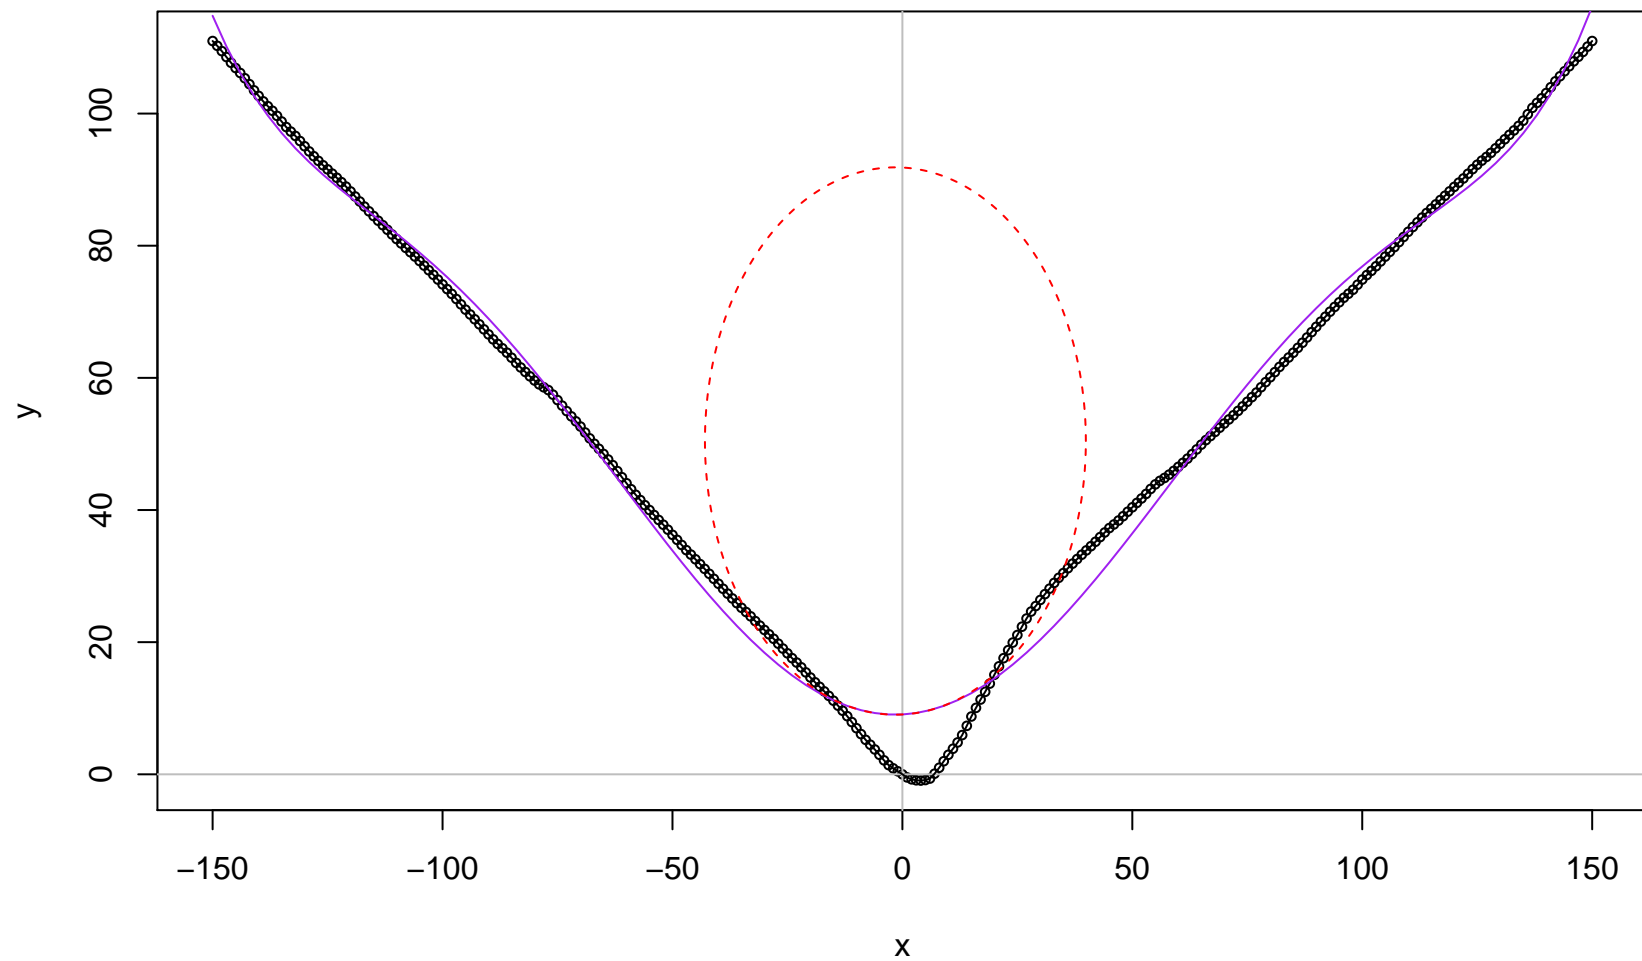

Site 331

$K*100 = -0.3129$

$R^2 = 0.8712$

radius= -319.5459

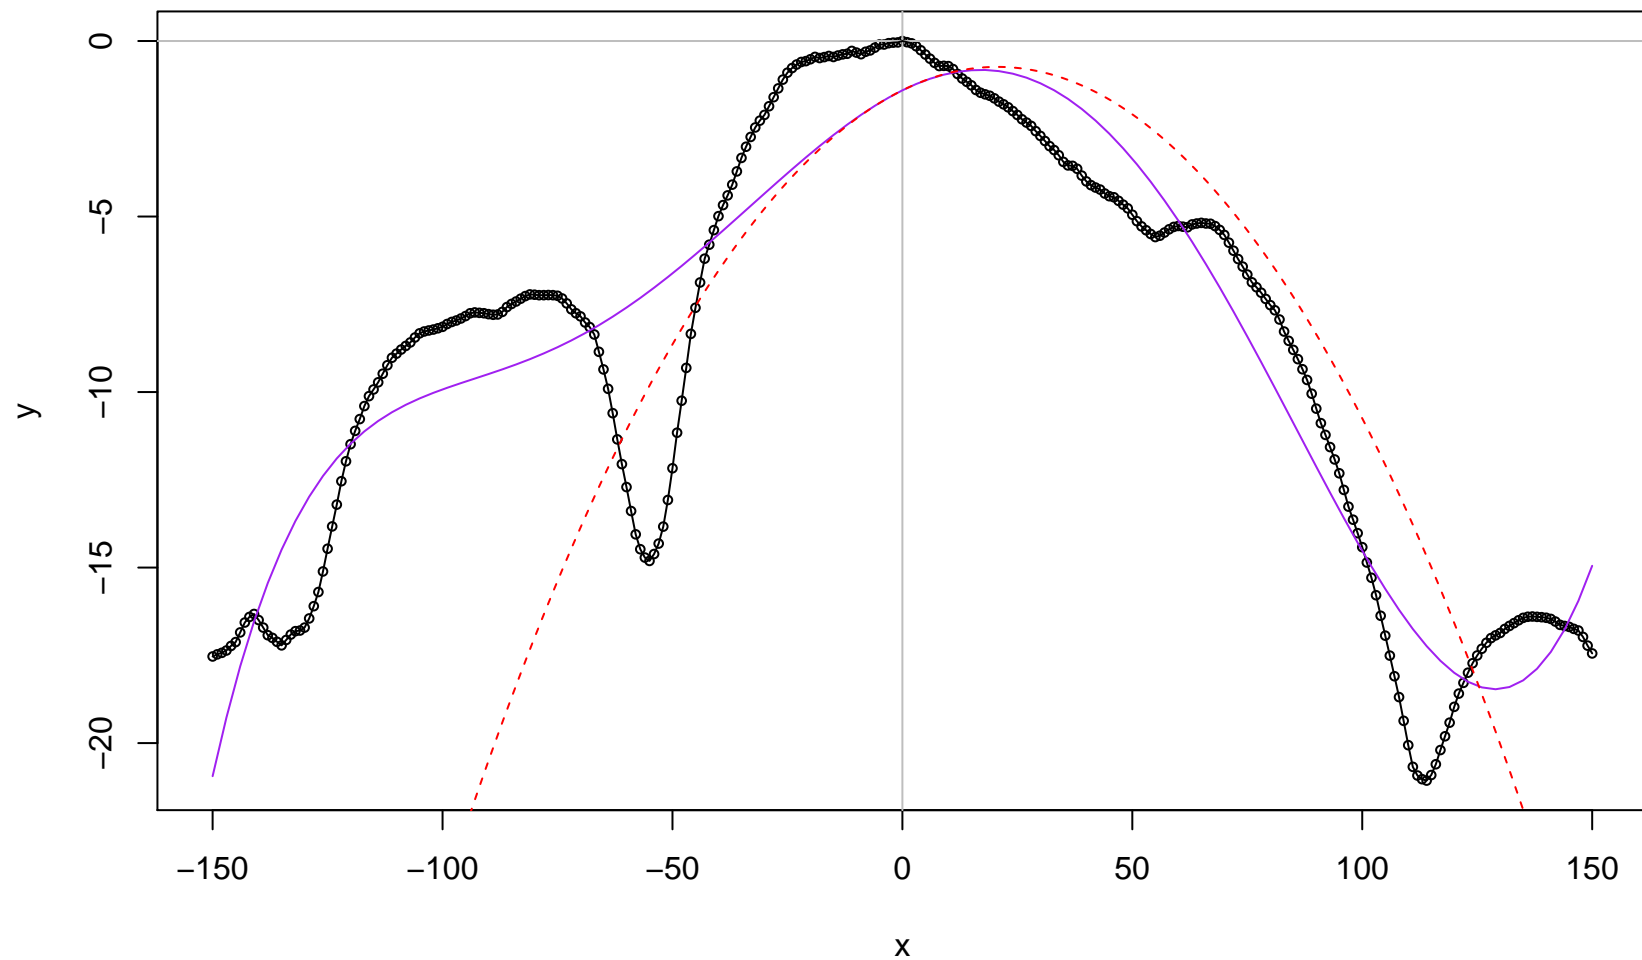

Site 332

$K*100= 0.3079$

$R2= 0.8119$

radius= 324.8319

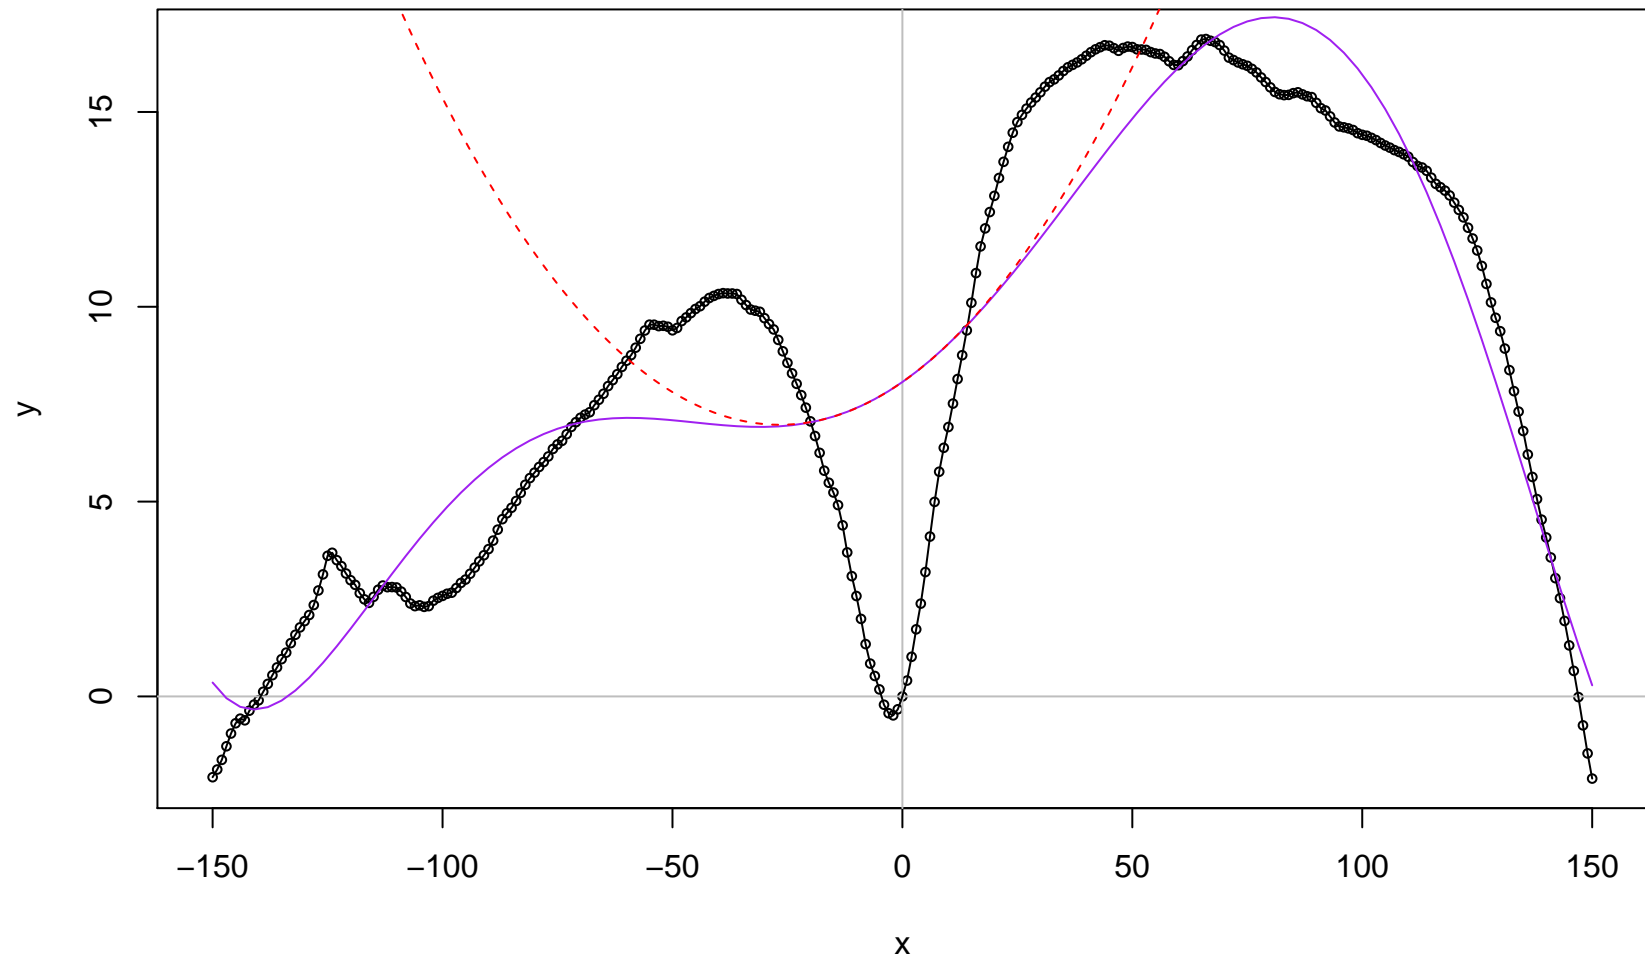

Site 333

$K*100= 1.1321$

$R^2= 0.8894$

radius= 88.3328

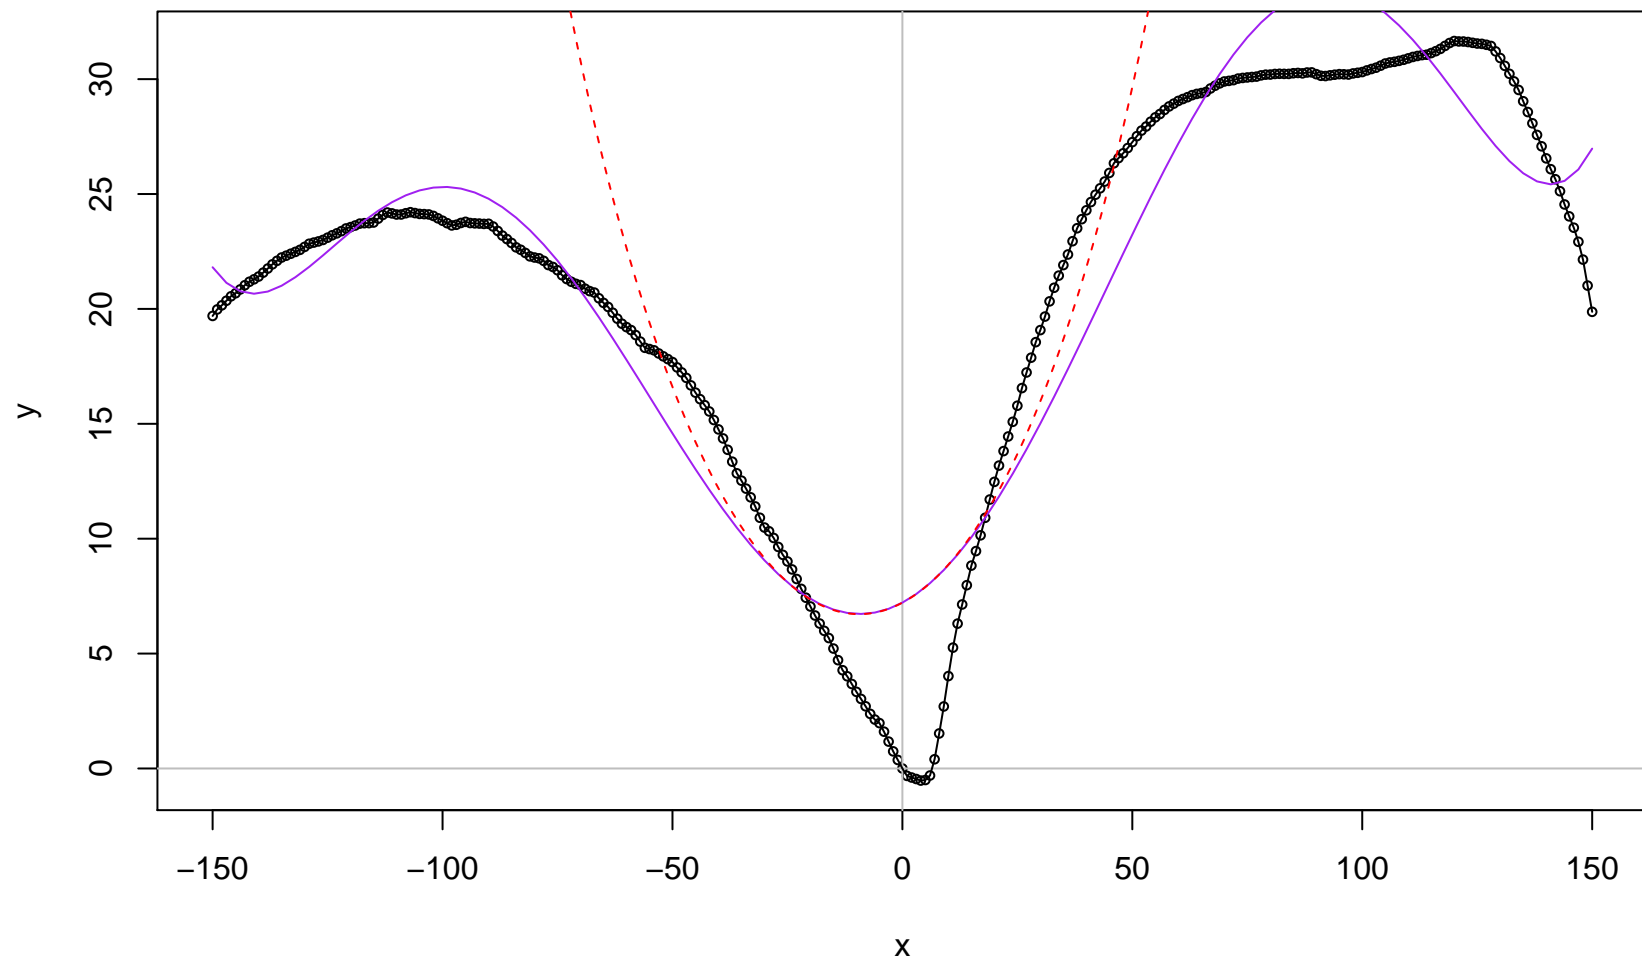

Site 334

$K \cdot 100 = 0.1493$

$R^2 = 0.9419$

radius= 669.5904

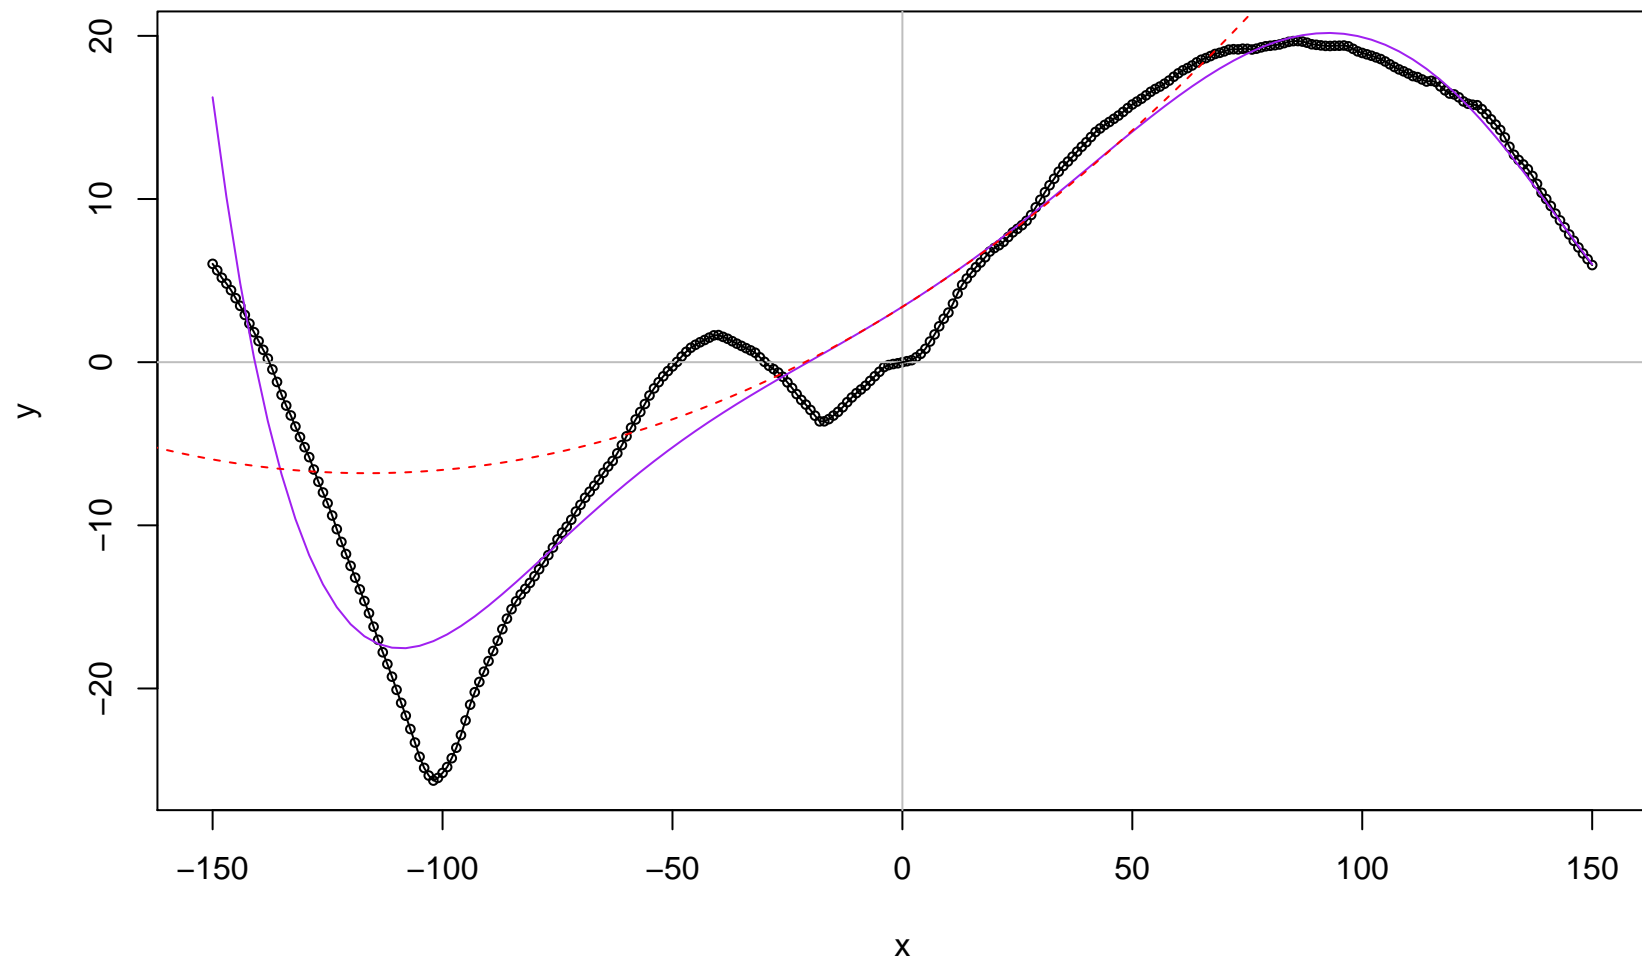

Site 335

$K*100= 1.8649$

$R^2= 0.9207$

radius= 53.6211

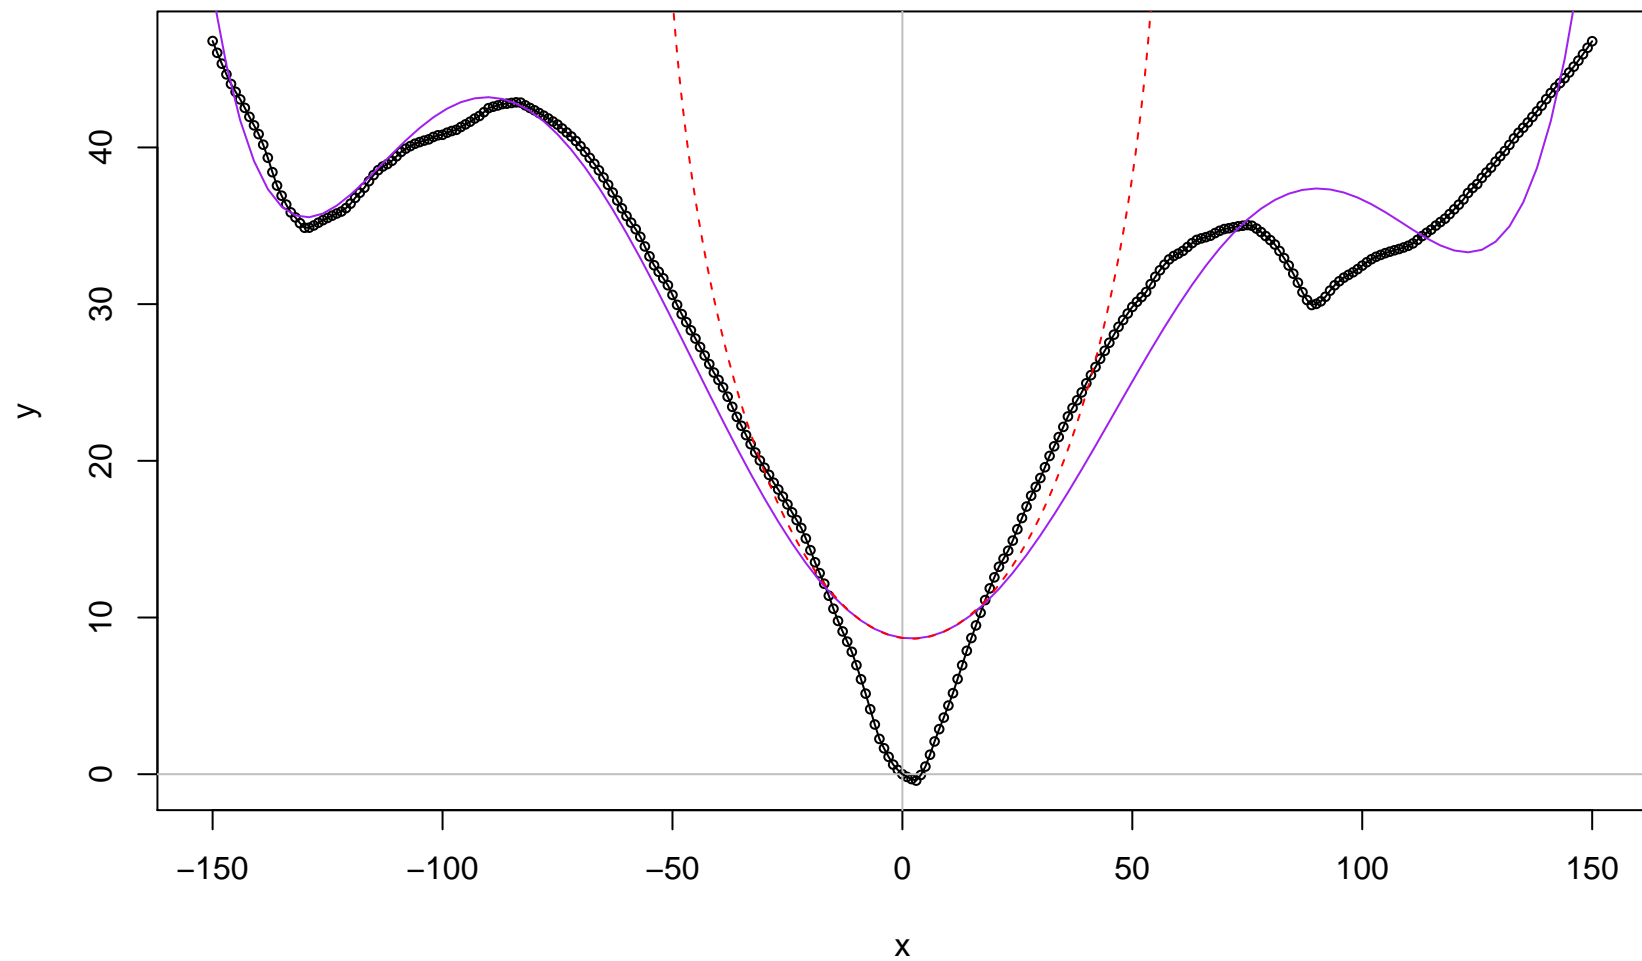

Site 336

$K*100= 0.7339$

$R^2= 0.8963$

radius= 136.2651

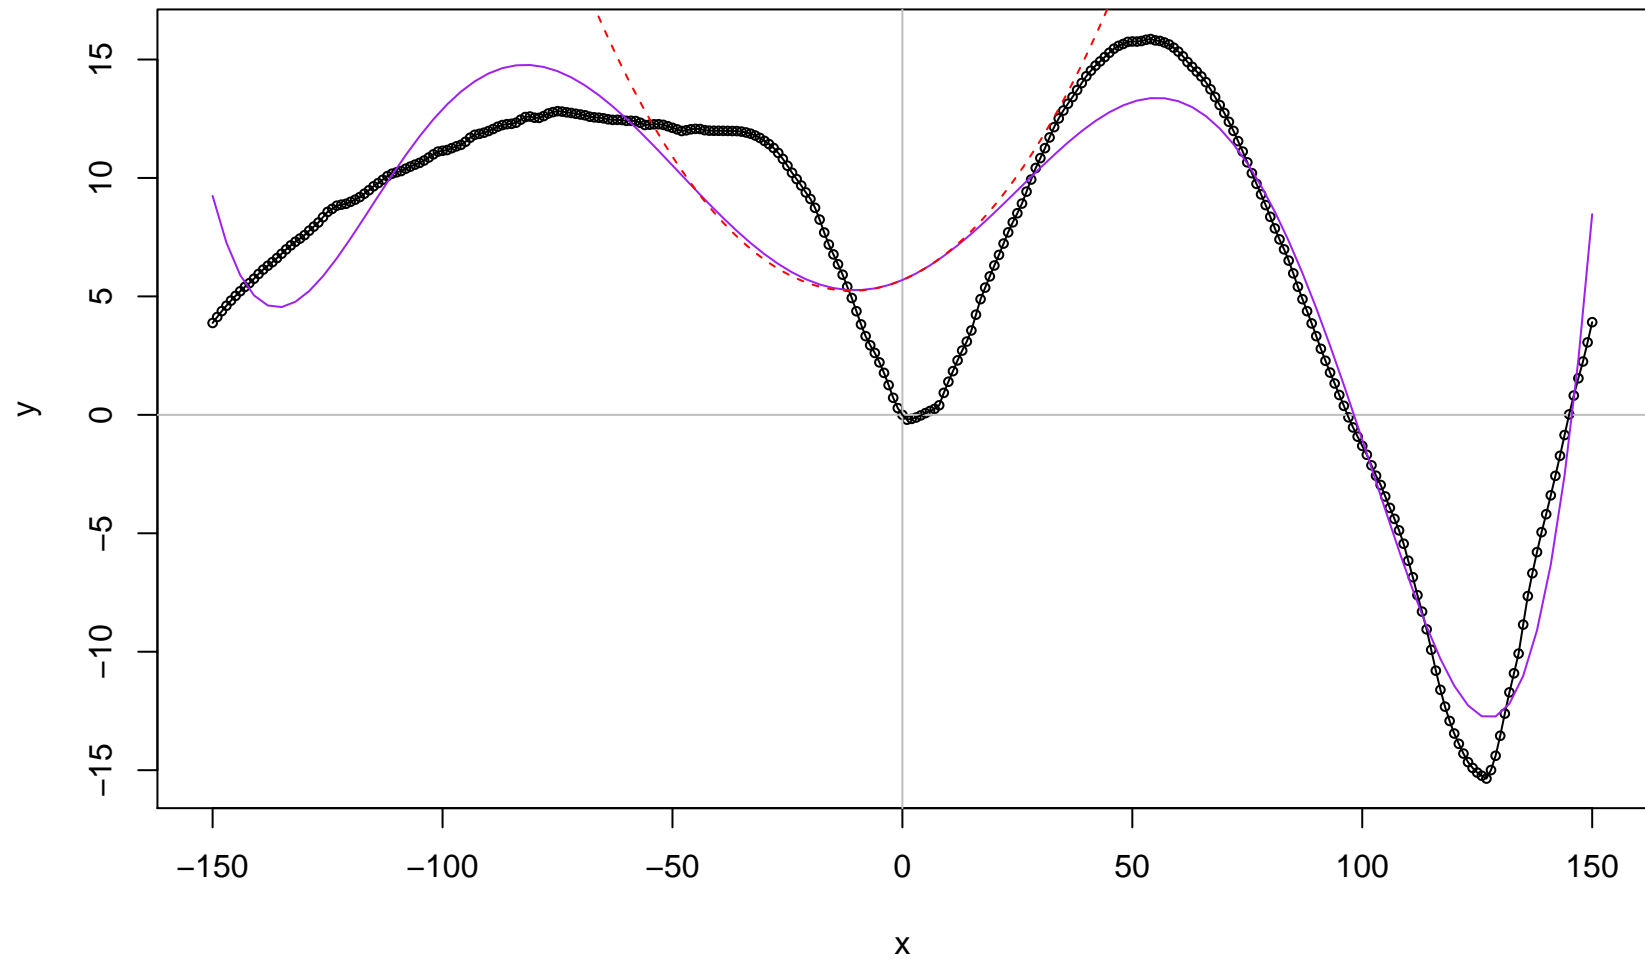



Site 337

$K*100= 0.5417$

$R^2= 0.9055$

radius= 184.5878

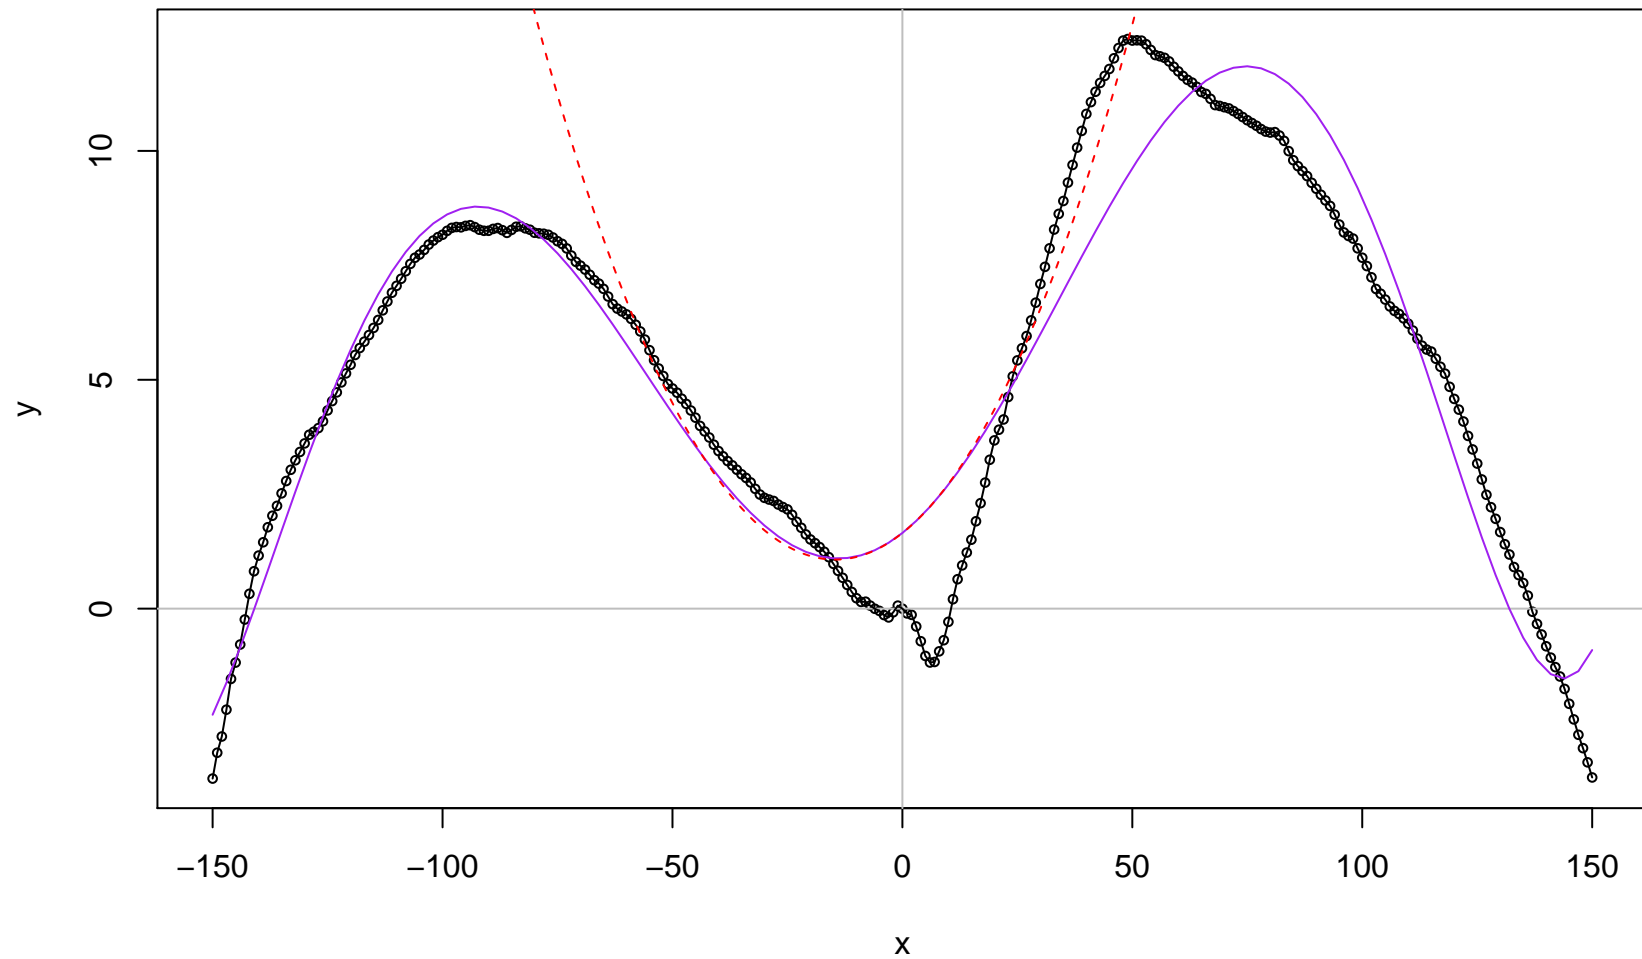

Site 338

$K*100= 0.5393$

$R^2= 0.9871$

radius= 185.4411

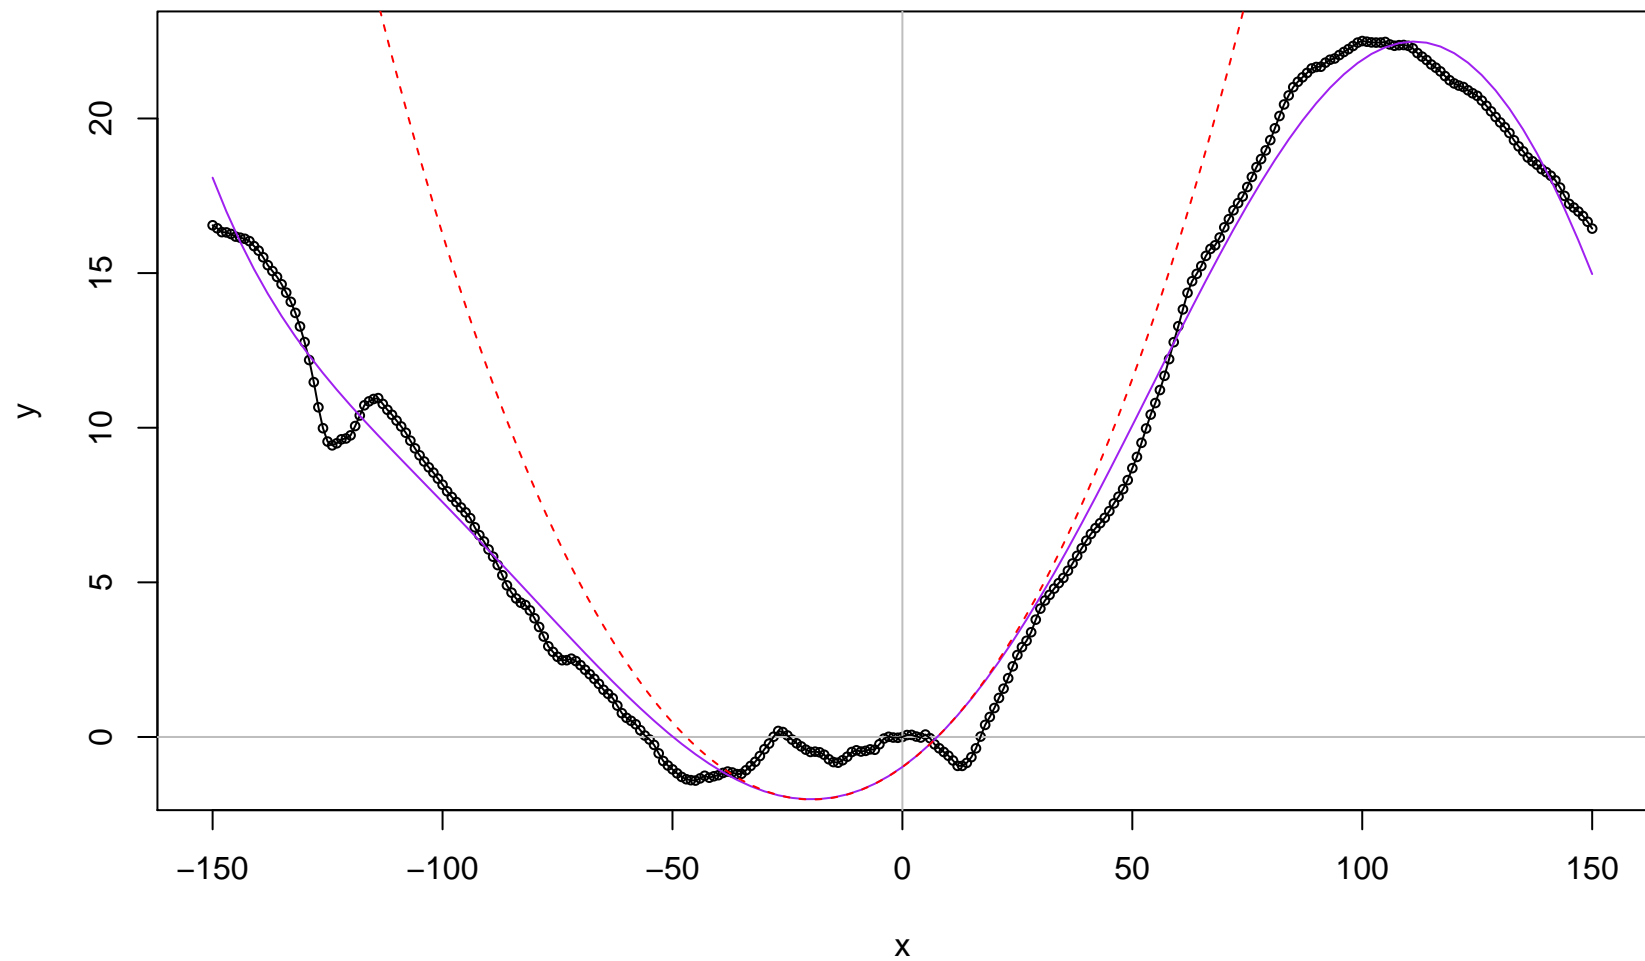

Site 339

$K*100= 1.5836$

$R^2= 0.9707$

radius= 63.1476

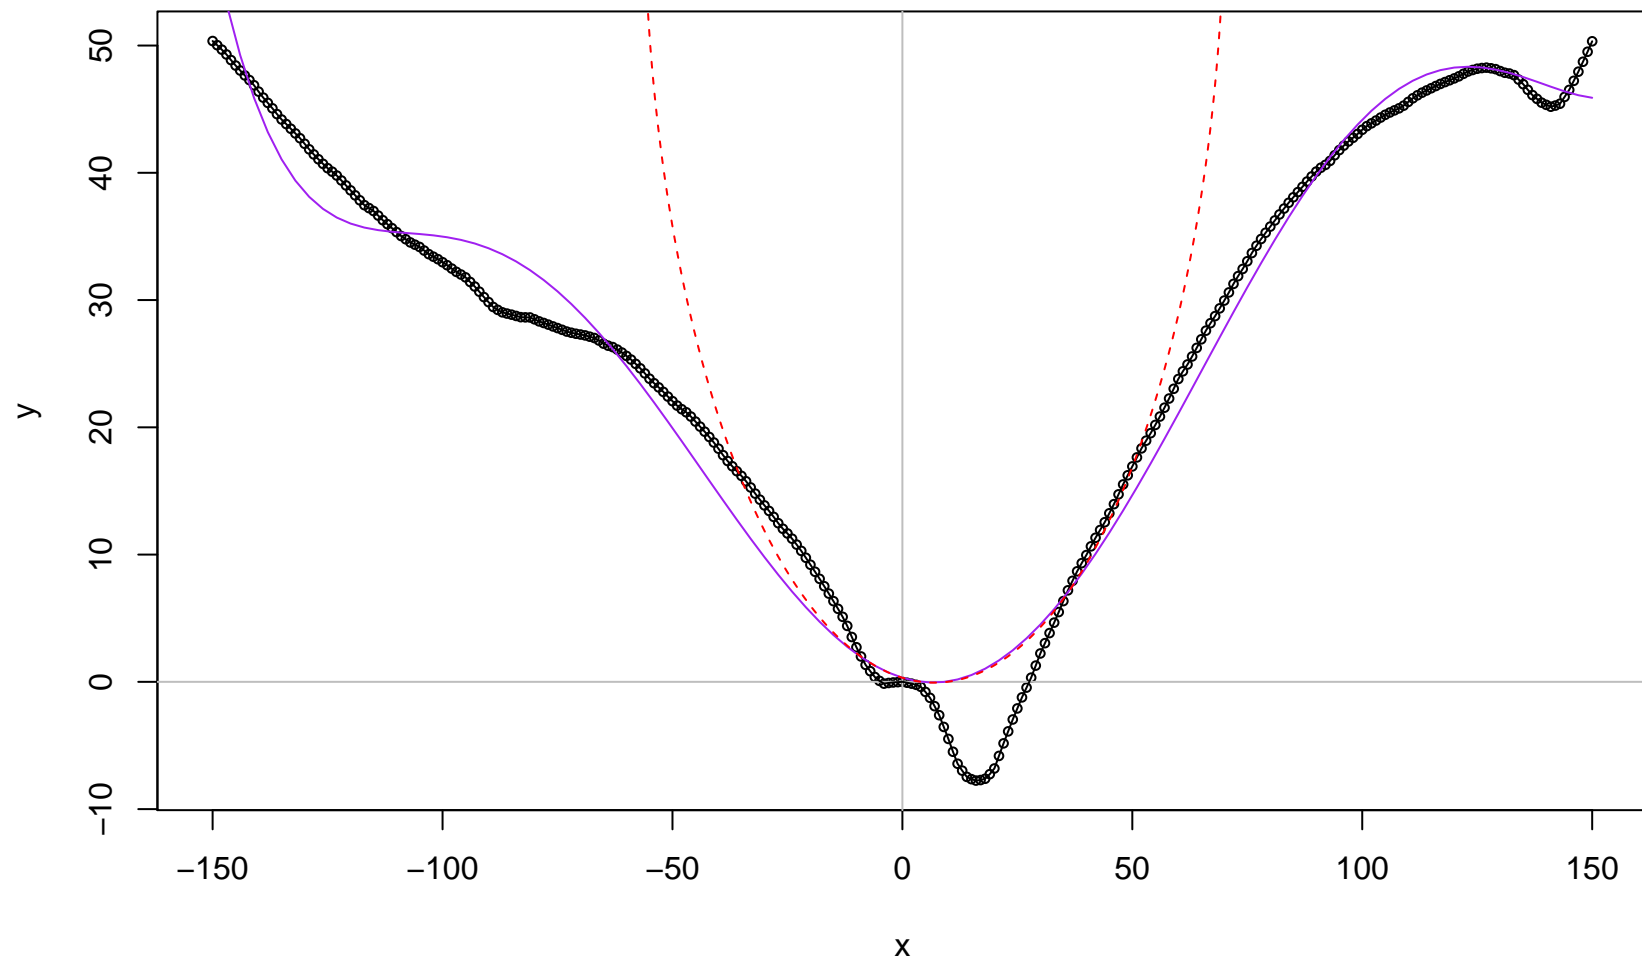

Site 340

$K*100= 1.1909$

$R^2= 0.9549$

radius= 83.9707

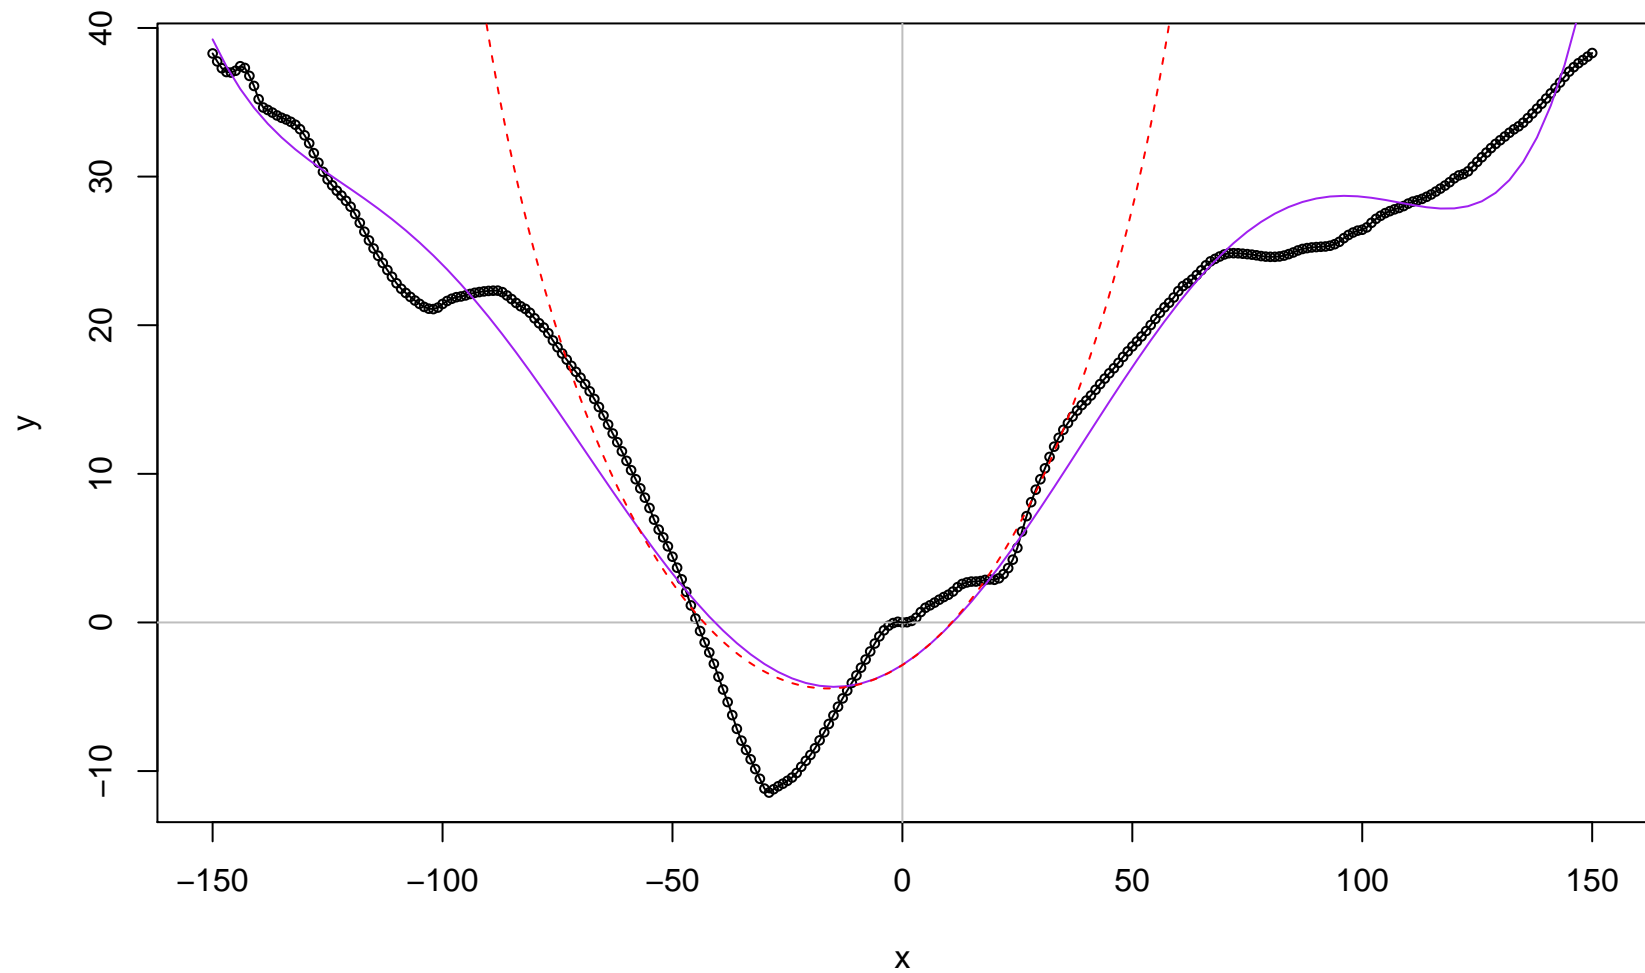

Site 341

$K*100= 0.2535$

$R^2= 0.9922$

radius= 394.4164

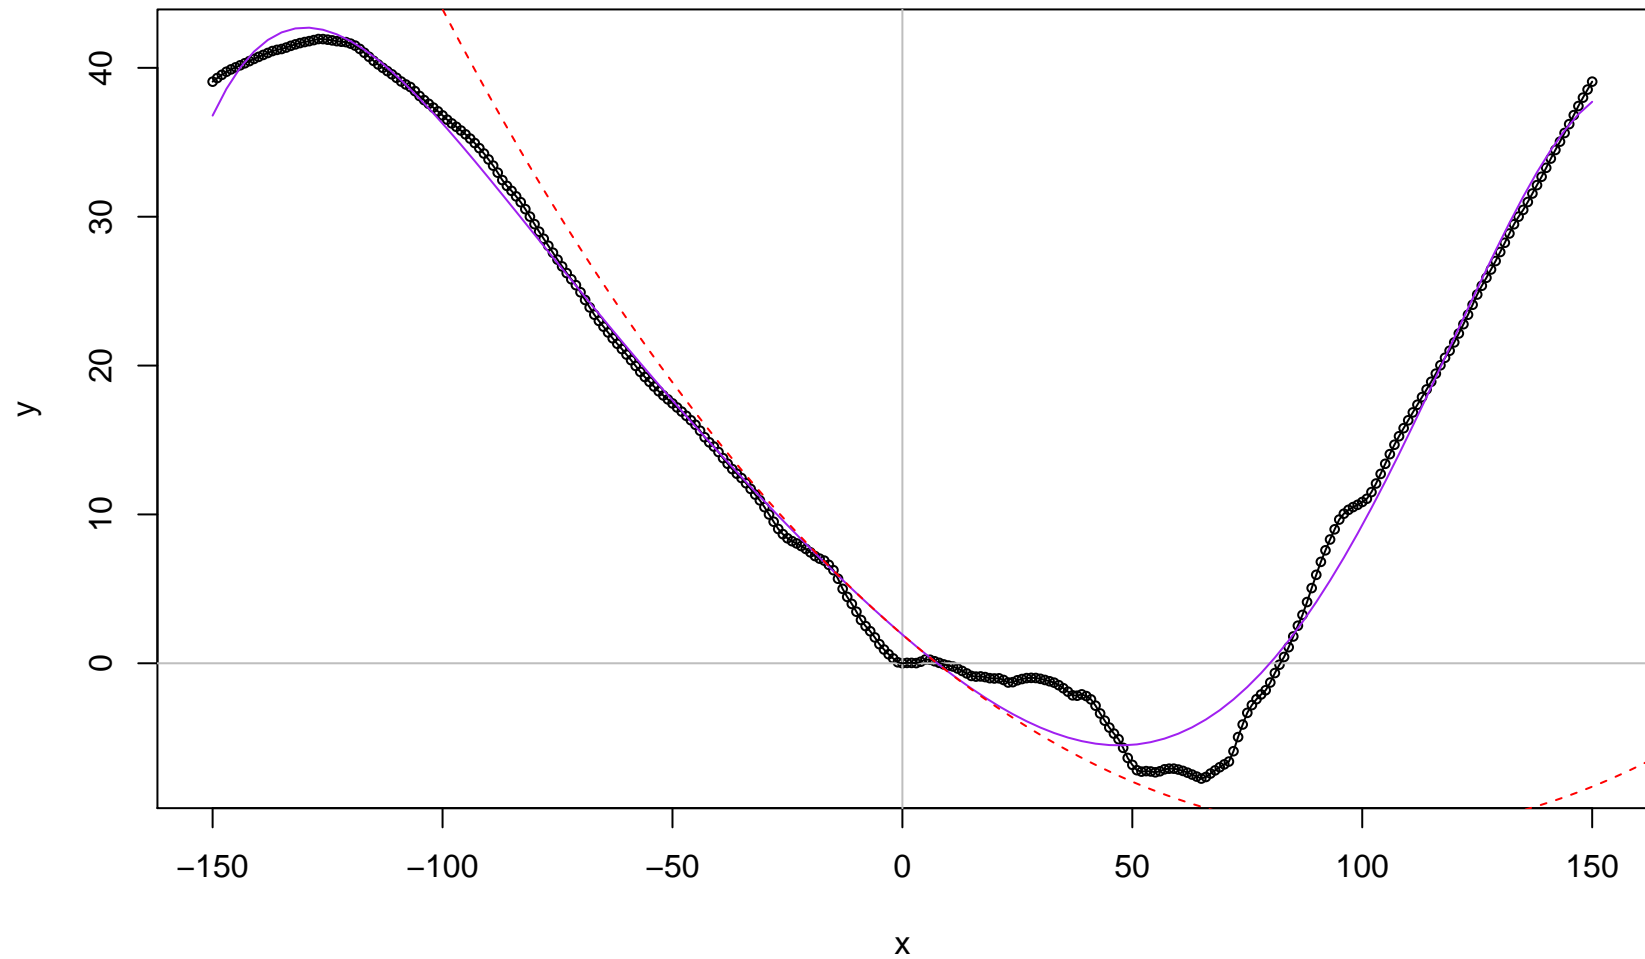

Site 342

$K \cdot 100 = 0.9273$

$R^2 = 0.8099$

radius= 107.8391

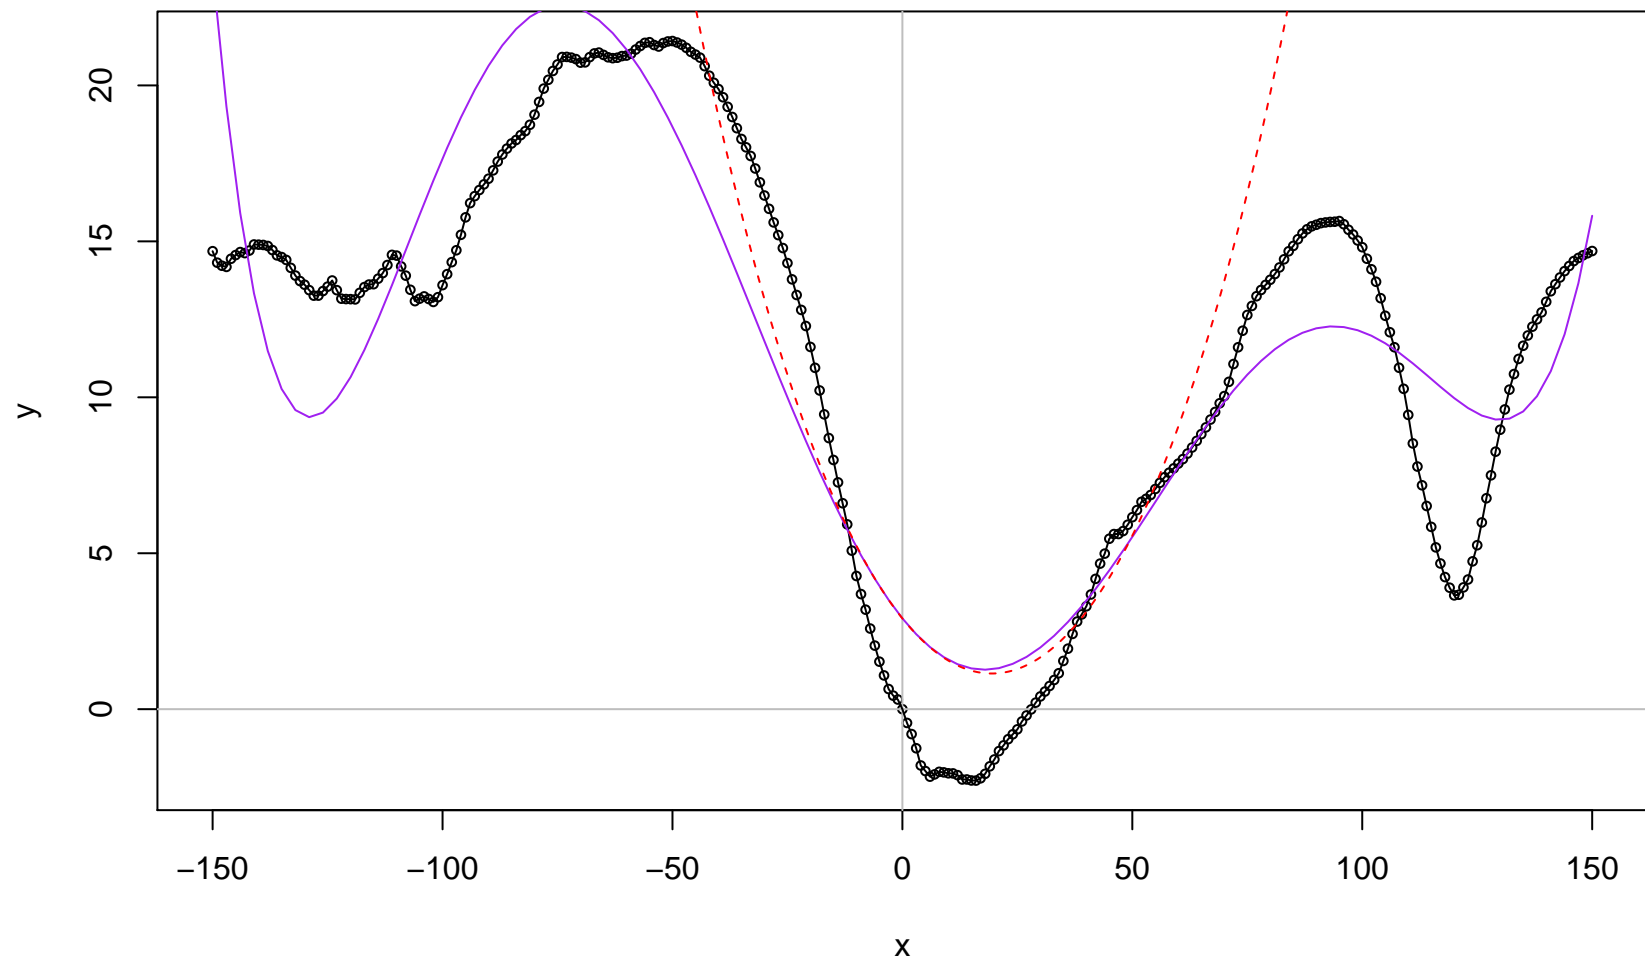

Site 343

$K*100 = -0.524$

$R^2 = 0.7341$

radius =  $-190.8371$

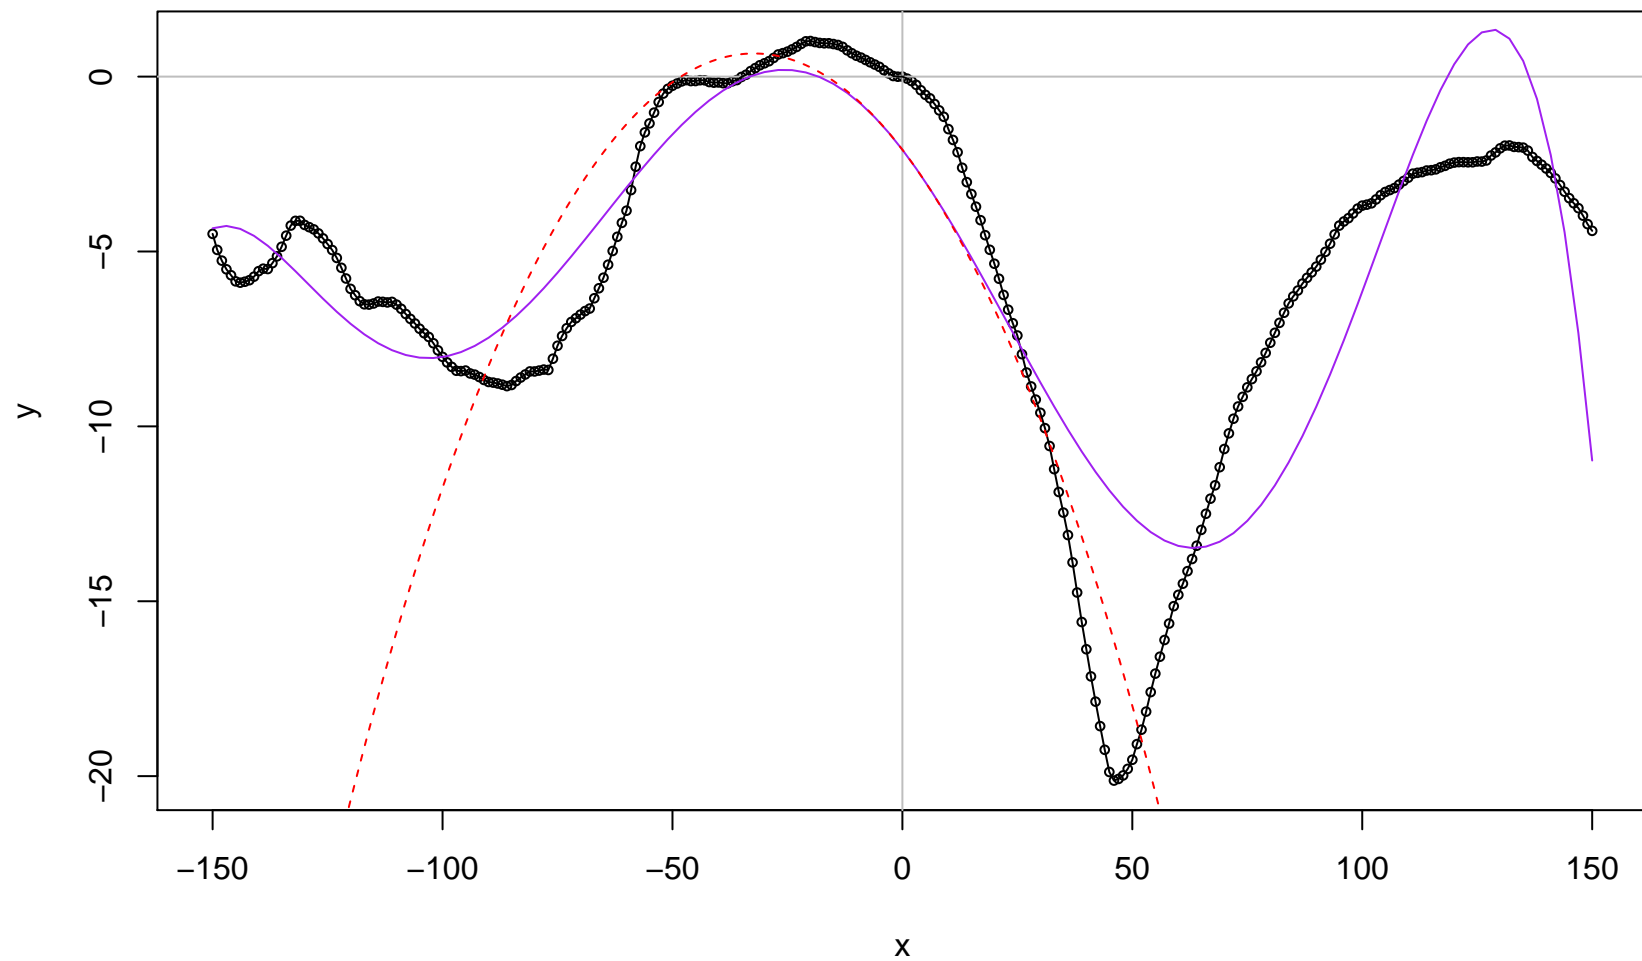

Site 344

$K^*100 = -0.8723$

$R^2 = 0.8489$

radius =  $-114.639$

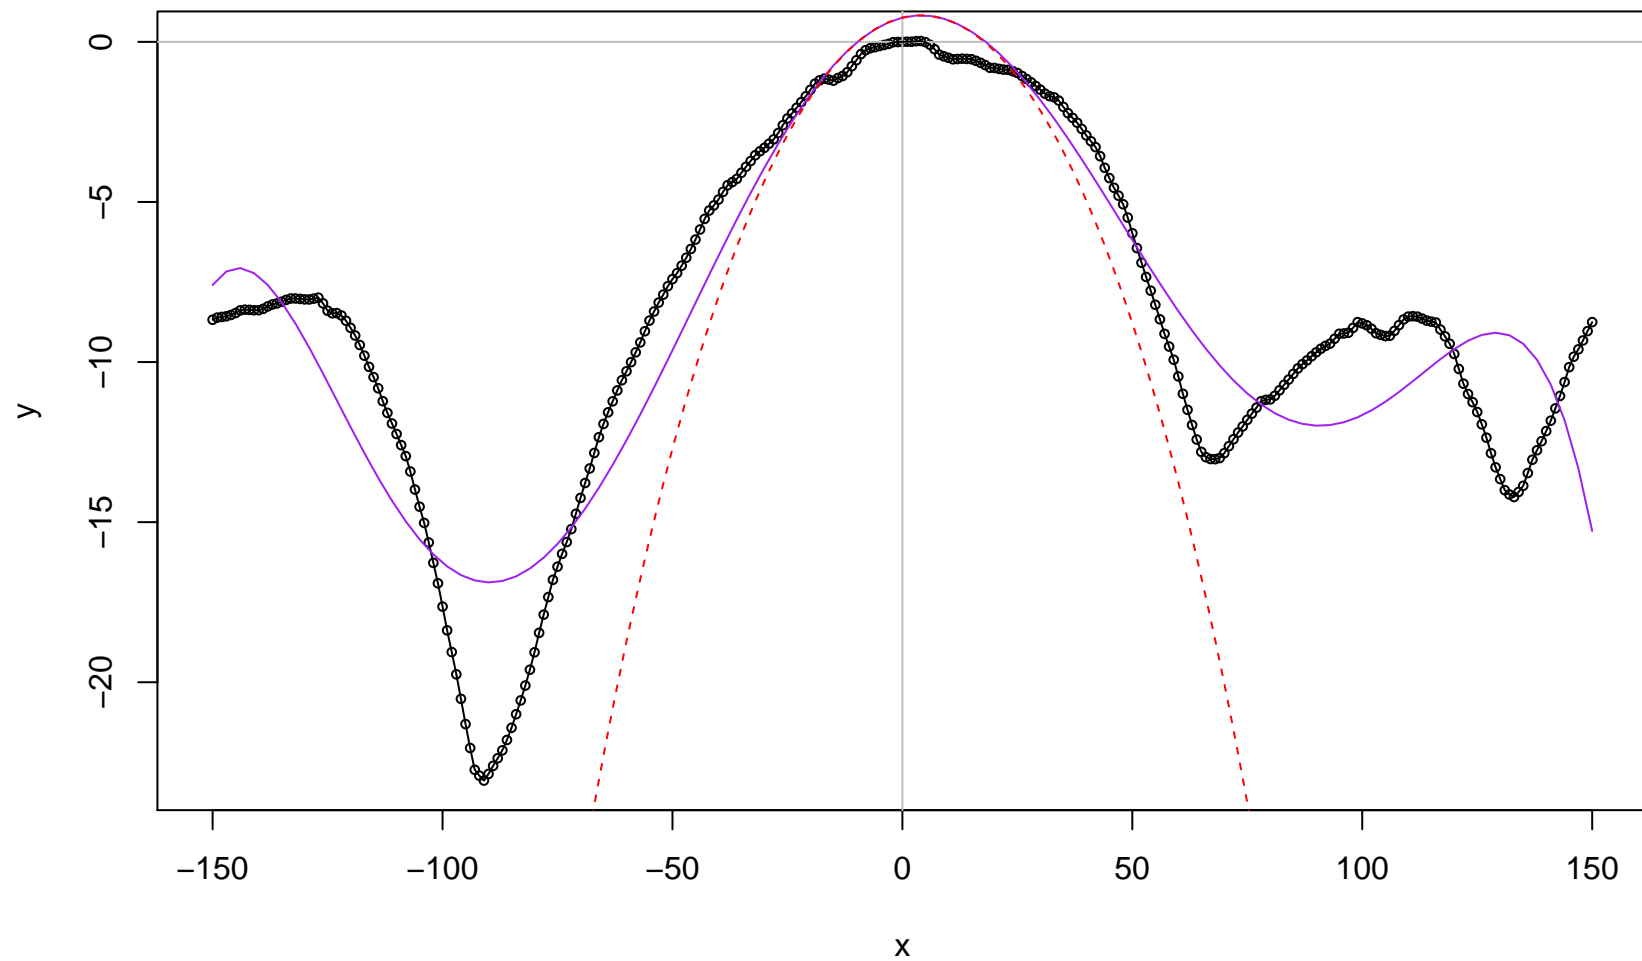



Site 345

$K*100= 0.6596$

$R^2= 0.7986$

radius= 151.599

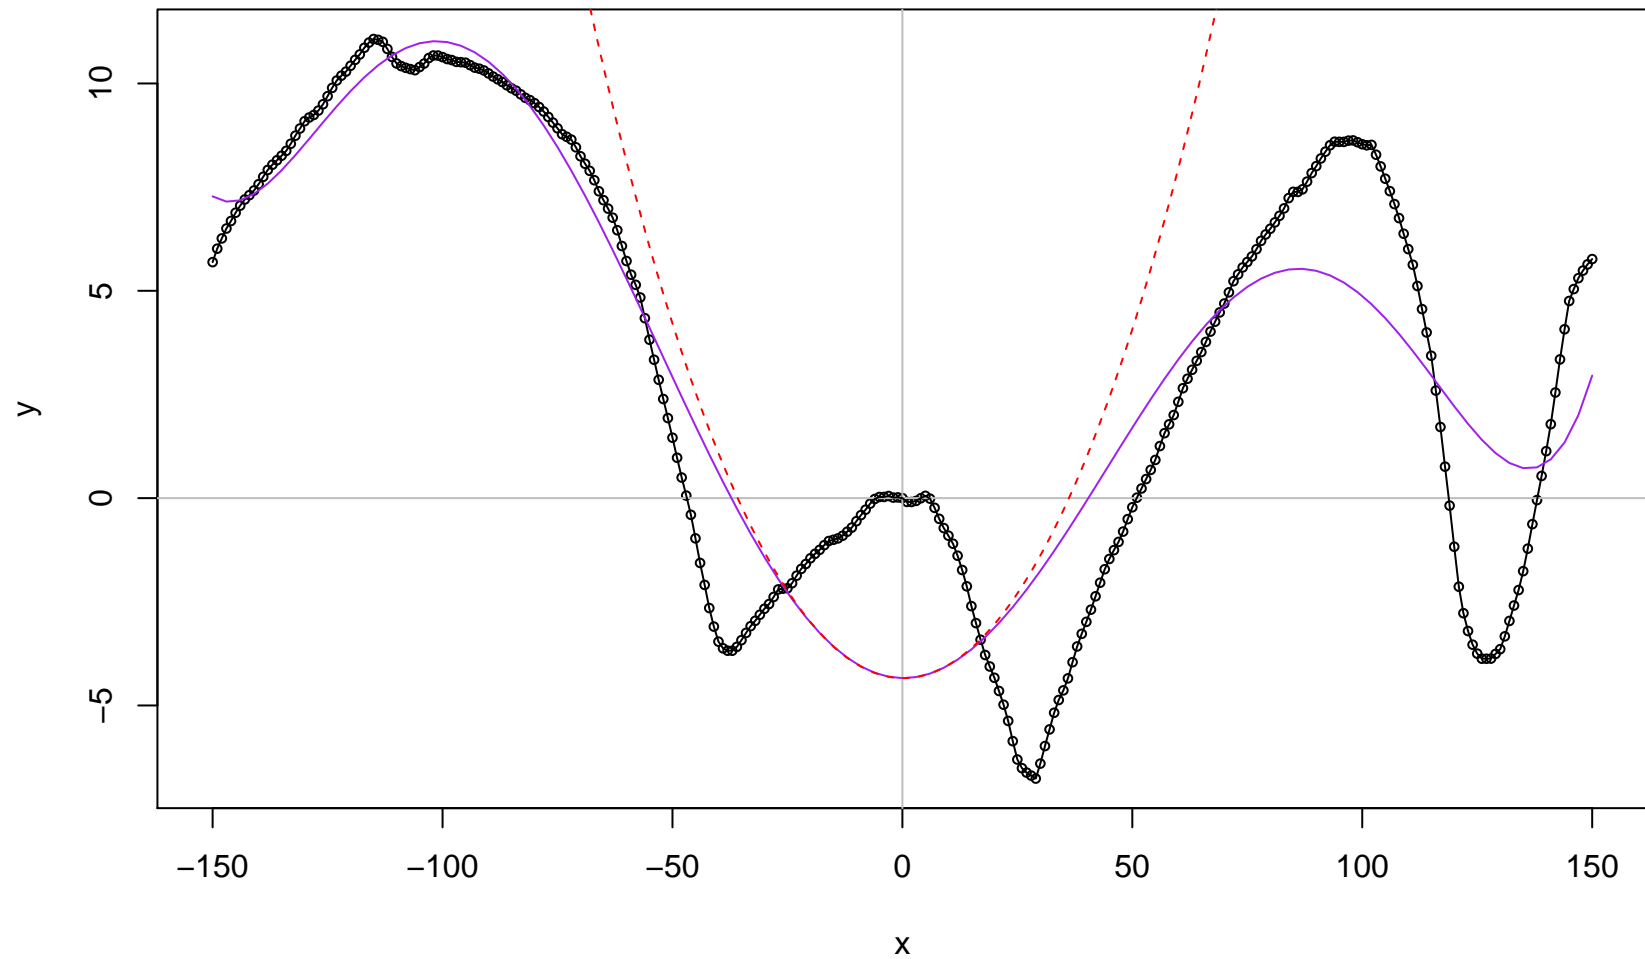

Site 346

$K*100= 0.1276$

$R^2= 0.9936$

radius= 783.3987

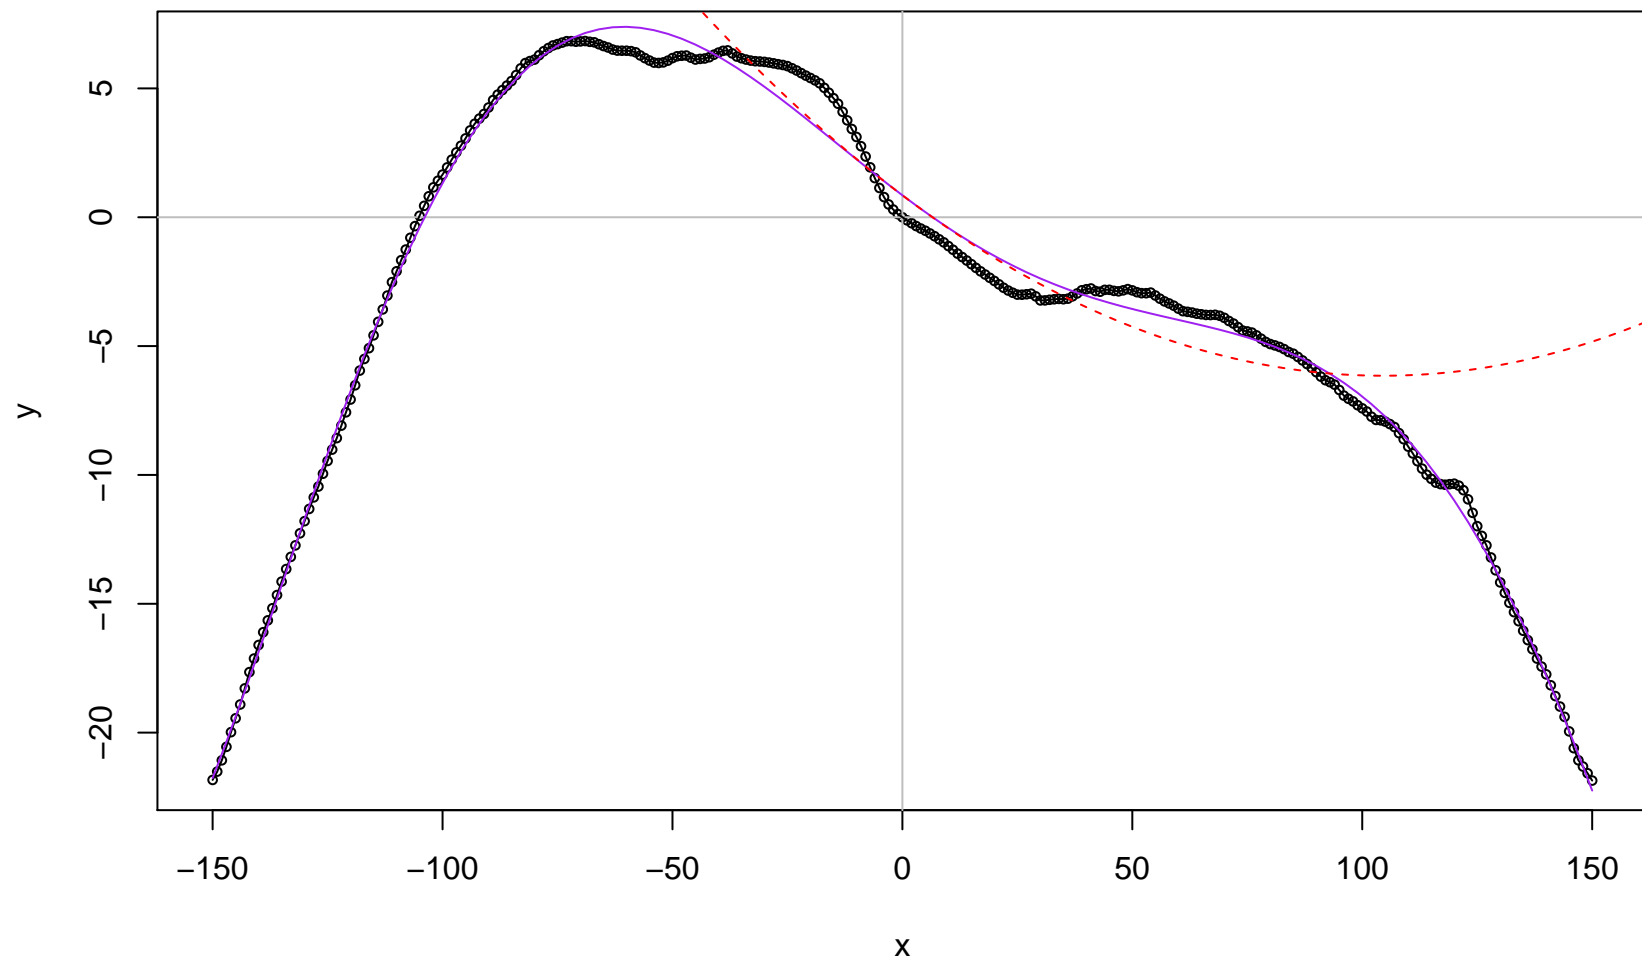

Site 347

$K*100 = -0.21$

$R^2 = 0.9867$

radius = -476.1816

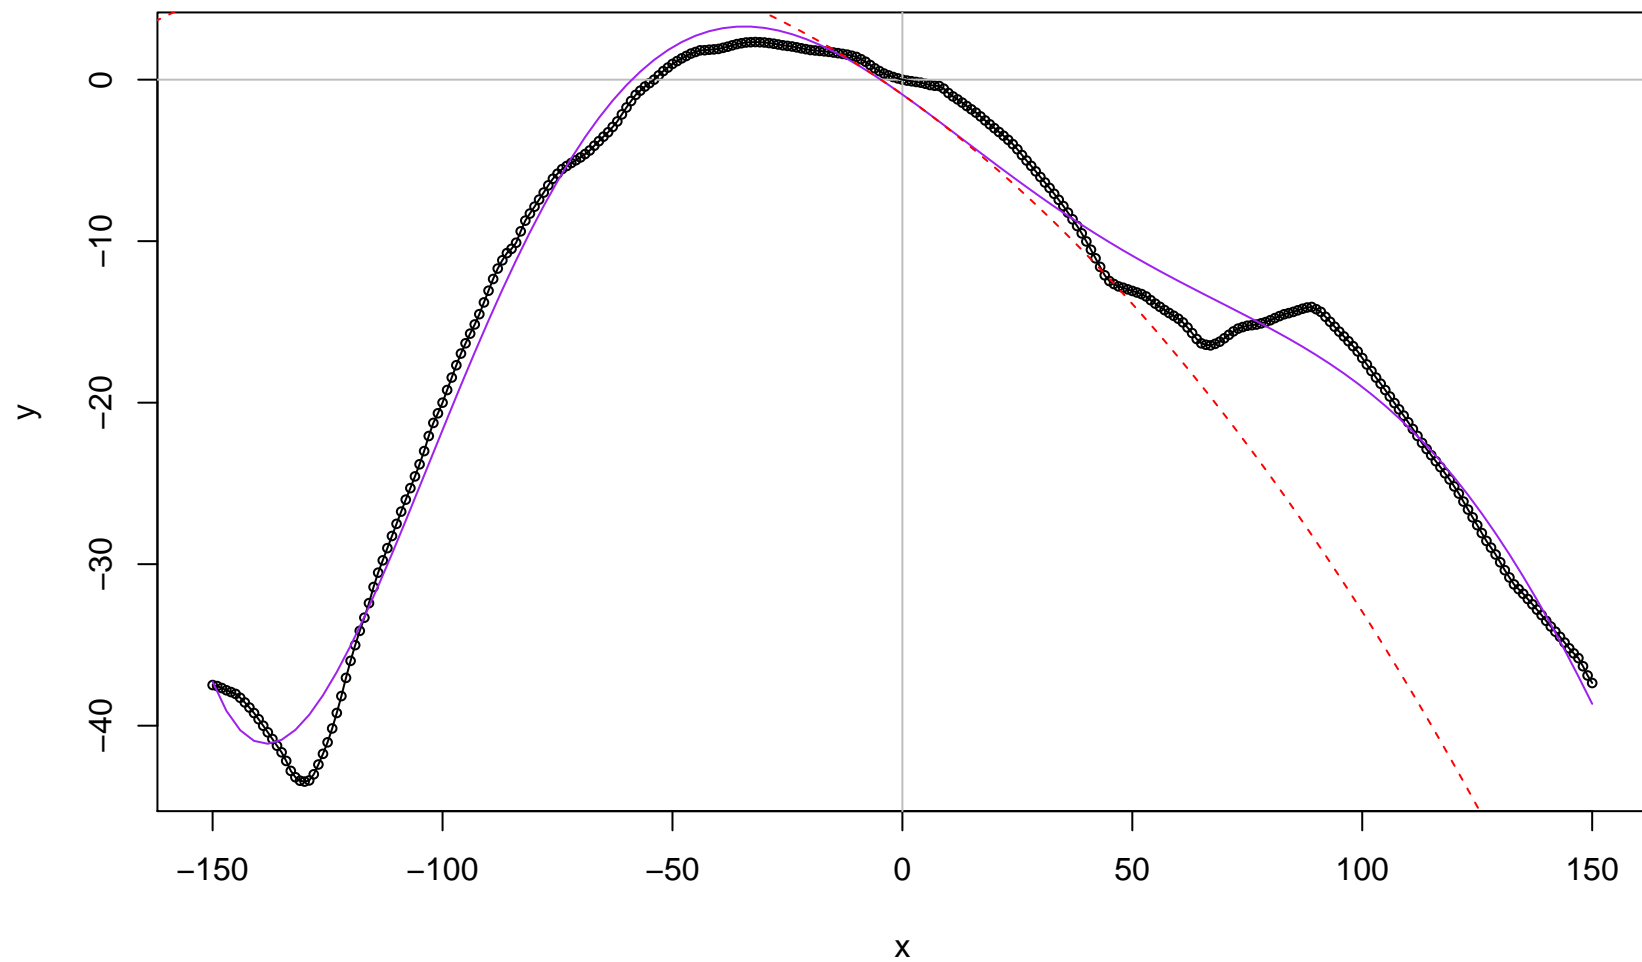

Supplement: Supplementary file 1 [file 2]
